# Supplementary material for: Proteomic-based identification of maternal proteins in mature mouse oocytes
Source: PubMed Central journal article supplement (PMC2730056; doi:10.1186/1471-2164-10-348), 2009-08-03
Supplement: 1471-2164-10-348-S2.pdf [file 1471-2164-10-348-S2.pdf]

## MS/MS spectra and fragment assignments of single peptide-based identifications.

Gene symbol: -

Protein name: 22 kDa protein

Protein accession numbers: IPI00762428

Peptide sequence: (R)LLQCDPSSASQF

Exclusive (unique to this protein): TRUE

SEQUEST XCorr score: 2.13 SEQUEST DCn score: 0.662

Fix modifications: C4: Carbamidomethyl (+57.02)

Variable modifications: None

charge: 2

Observed m/z: 676.8119

Actual minus calculated peptide mass (AMU): 0.0002441

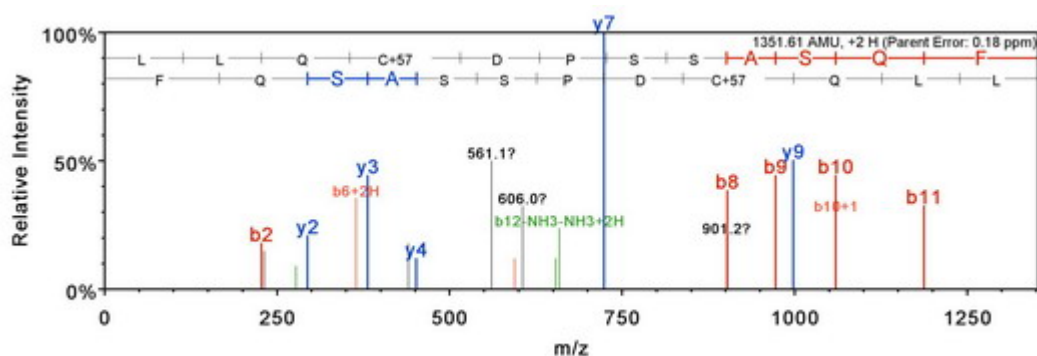

| B  | B ions | B+2H  | B-NH3  | B-H2O  | AA   | Y ions | Y+2H | Y-NH3  | Y-H2O  | Y  |
|----|--------|-------|--------|--------|------|--------|------|--------|--------|----|
| 1  | 114.1  |       |        |        | L    | 1352.6 |      | 1335.6 | 1334.6 | 12 |
| 2  | 227.2  |       |        |        | L    | 1239.5 |      | 1222.5 | 1221.5 | 11 |
| 3  | 355.2  |       | 338.2  |        | Q    | 1126.5 |      | 1109.4 | 1108.4 | 10 |
| 4  | 515.3  |       | 498.2  |        | C+57 | 998.4  |      | 981.4  | 980.4  | 9  |
| 5  | 630.3  |       | 613.3  | 612.3  | D    | 838.4  |      | 821.3  | 820.4  | 8  |
| 6  | 727.4  | 364.2 | 710.3  | 709.3  | P    | 723.3  |      | 706.3  | 705.3  | 7  |
| 7  | 814.4  | 407.7 | 797.4  | 796.4  | S    | 626.3  |      | 609.3  | 608.3  | 6  |
| 8  | 901.4  | 451.2 | 884.4  | 883.4  | S    | 539.3  |      | 522.2  | 521.2  | 5  |
| 9  | 972.5  | 486.7 | 955.4  | 954.4  | A    | 452.2  |      | 435.2  | 434.2  | 4  |
| 10 | 1059.5 | 530.2 | 1042.5 | 1041.5 | S    | 381.2  |      | 364.2  | 363.2  | 3  |
| 11 | 1187.5 | 594.3 | 1170.5 | 1169.5 | Q    | 294.2  |      | 277.1  |        | 2  |
| 12 | 1352.6 | 676.8 | 1335.6 | 1334.6 | F    | 166.1  |      |        |        | 1  |

Gene symbol: -

Protein name: 23 kDa protein

Protein accession numbers: IPI00761220

Peptide sequence: (R)VLNSYWVGEDSTYK(V)

Exclusive (unique to this protein): TRUE

SEQUEST XCorr score: 2.25 SEQUEST DCn score: 0.681

Fix modifications: None

Variable modifications: None

charge: 2

Observed m/z: 830.8931

Actual minus calculated peptide mass (AMU): -0.0074454

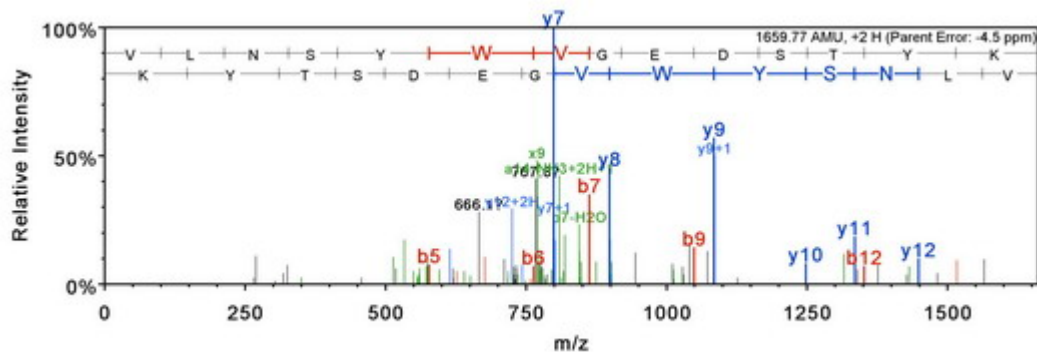

| B  | B ions | B+2H  | B-NH3  | B-H2O  | AA | Y ions | Y+2H  | Y-NH3  | Y-H2O  | Y  |
|----|--------|-------|--------|--------|----|--------|-------|--------|--------|----|
| 1  | 100.1  |       |        |        | V  | 1660.8 | 830.9 | 1643.8 | 1642.8 | 14 |
| 2  | 213.2  |       |        |        | L  | 1561.7 | 781.4 | 1544.7 | 1543.7 | 13 |
| 3  | 327.2  |       | 310.2  |        | N  | 1448.6 | 724.8 | 1431.6 | 1430.6 | 12 |
| 4  | 414.2  |       | 397.2  | 396.2  | S  | 1334.6 | 667.8 | 1317.6 | 1316.6 | 11 |
| 5  | 577.3  |       | 560.3  | 559.3  | Y  | 1247.6 | 624.3 | 1230.5 | 1229.5 | 10 |
| 6  | 763.4  | 382.2 | 746.4  | 745.4  | W  | 1084.5 | 542.8 | 1067.5 | 1066.5 | 9  |
| 7  | 862.5  | 431.7 | 845.4  | 844.4  | V  | 898.4  | 449.7 | 881.4  | 880.4  | 8  |
| 8  | 919.5  | 460.2 | 902.4  | 901.5  | G  | 799.4  | 400.2 | 782.3  | 781.3  | 7  |
| 9  | 1048.5 | 524.8 | 1031.5 | 1030.5 | E  | 742.3  | 371.7 | 725.3  | 724.3  | 6  |
| 10 | 1163.5 | 582.3 | 1146.5 | 1145.5 | D  | 613.3  |       | 596.3  | 595.3  | 5  |
| 11 | 1250.6 | 625.8 | 1233.5 | 1232.6 | S  | 498.3  |       | 481.2  | 480.3  | 4  |
| 12 | 1351.6 | 676.3 | 1334.6 | 1333.6 | T  | 411.2  |       | 394.2  | 393.2  | 3  |
| 13 | 1514.7 | 757.8 | 1497.7 | 1496.7 | Y  | 310.2  |       | 293.2  |        | 2  |
| 14 | 1660.8 | 830.9 | 1643.8 | 1642.8 | K  | 147.1  |       | 130.1  |        | 1  |

Gene symbol: -

Protein name: 27 kDa protein

Protein accession numbers: IPI00625569

Peptide sequence: (K)SPYQEFTDHLVK(T)

Exclusive (unique to this protein): TRUE

SEQUEST XCorr score: 2.47 SEQUEST DCn score: 0.527

Fix modifications: None

Variable modifications: None

charge: 2

Observed m/z: 732.3629

Actual minus calculated peptide mass (AMU): 0.0009766

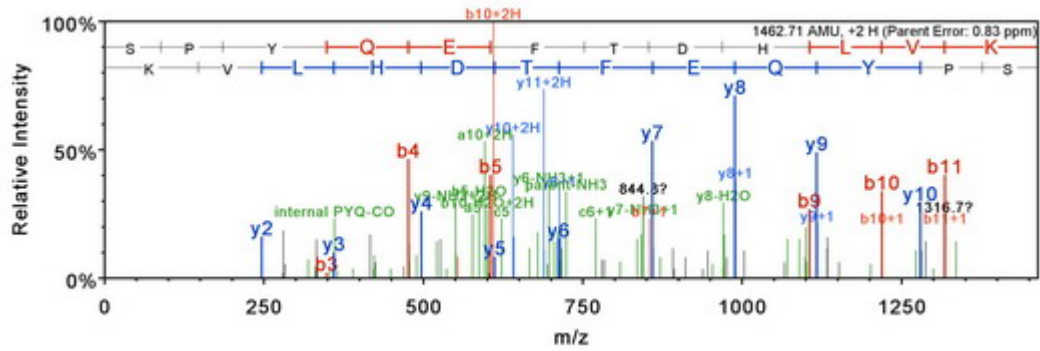

| B  | B ions | B+2H  | B-NH3  | B-H2O  | AA | Y ions | Y+2H  | Y-NH3  | Y-H2O  | Y  |
|----|--------|-------|--------|--------|----|--------|-------|--------|--------|----|
| 1  | 88.0   |       |        | 70.0   | S  | 1463.7 | 732.4 | 1446.7 | 1445.7 | 12 |
| 2  | 185.1  |       |        | 167.1  | P  | 1376.7 | 688.9 | 1359.7 | 1358.7 | 11 |
| 3  | 348.2  |       |        | 330.2  | Y  | 1279.6 | 640.3 | 1262.6 | 1261.6 | 10 |
| 4  | 476.2  |       | 459.2  | 458.2  | Q  | 1116.6 | 558.8 | 1099.5 | 1098.6 | 9  |
| 5  | 605.3  |       | 588.2  | 587.3  | E  | 988.5  | 494.8 | 971.5  | 970.5  | 8  |
| 6  | 752.3  | 376.7 | 735.3  | 734.3  | F  | 859.5  | 430.2 | 842.4  | 841.5  | 7  |
| 7  | 853.4  | 427.2 | 836.4  | 835.4  | T  | 712.4  | 356.7 | 695.4  | 694.4  | 6  |
| 8  | 968.4  | 484.7 | 951.4  | 950.4  | D  | 611.4  | 306.2 | 594.3  | 593.3  | 5  |
| 9  | 1105.5 | 553.2 | 1088.4 | 1087.5 | H  | 496.3  | 248.7 | 479.3  |        | 4  |
| 10 | 1218.5 | 609.8 | 1201.5 | 1200.5 | L  | 359.3  |       | 342.2  |        | 3  |
| 11 | 1317.6 | 659.3 | 1300.6 | 1299.6 | V  | 246.2  |       | 229.2  |        | 2  |
| 12 | 1463.7 | 732.4 | 1446.7 | 1445.7 | K  | 147.1  |       | 130.1  |        | 1  |

Gene symbol: -

Protein name: 29 kDa protein

Protein accession numbers: IPI00626848

Peptide sequence: (R)IVEPYIAWGYPNLK(S)

Exclusive (unique to this protein): TRUE

SEQUEST XCorr score: 2.11 SEQUEST DCn score: 0.52

Fix modifications: None

Variable modifications: None

charge: 2

Observed m/z: 831.9464

Actual minus calculated peptide mass (AMU): -0.004639

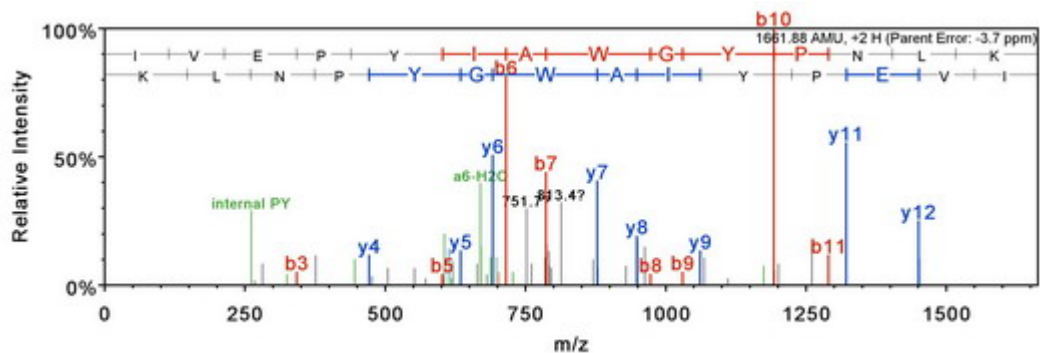

| B  | B Ions | B+2H  | B-NH3  | B-H2O  | AA | Y Ions | Y+2H  | Y-NH3  | Y-H2O  | Y  |
|----|--------|-------|--------|--------|----|--------|-------|--------|--------|----|
| 1  | 114.1  |       |        |        | I  | 1662.9 | 832.0 | 1645.9 | 1644.9 | 14 |
| 2  | 213.2  |       |        |        | V  | 1549.8 | 775.4 | 1532.8 | 1531.8 | 13 |
| 3  | 342.2  |       |        | 324.2  | E  | 1450.7 | 725.9 | 1433.7 | 1432.7 | 12 |
| 4  | 439.3  |       |        | 421.3  | P  | 1321.7 | 661.4 | 1304.7 |        | 11 |
| 5  | 602.3  |       |        | 584.3  | Y  | 1224.6 | 612.8 | 1207.6 |        | 10 |
| 6  | 715.4  | 358.2 |        | 697.4  | I  | 1061.6 | 531.3 | 1044.5 |        | 9  |
| 7  | 786.4  | 393.7 |        | 768.4  | A  | 948.5  | 474.8 | 931.5  |        | 8  |
| 8  | 972.5  | 486.8 |        | 954.5  | W  | 877.5  | 439.2 | 860.4  |        | 7  |
| 9  | 1029.5 | 515.3 |        | 1011.5 | G  | 691.4  | 346.2 | 674.4  |        | 6  |
| 10 | 1192.6 | 596.8 |        | 1174.6 | Y  | 634.4  |       | 617.3  |        | 5  |
| 11 | 1289.7 | 645.3 |        | 1271.7 | P  | 471.3  |       | 454.3  |        | 4  |
| 12 | 1403.7 | 702.4 | 1386.7 | 1385.7 | N  | 374.2  |       | 357.2  |        | 3  |
| 13 | 1516.8 | 758.9 | 1499.8 | 1498.8 | L  | 260.2  |       | 243.2  |        | 2  |
| 14 | 1662.9 | 832.0 | 1645.9 | 1644.9 | K  | 147.1  |       | 130.1  |        | 1  |

Gene symbol: -

Protein name: similar to Glyceraldehyde-3-phosphate dehydrogenase (GAPDH) isoform 1

Protein accession numbers: IPI00849530

Peptide sequence: (R)VPTPNVSIVDLTCR(L)

Exclusive (unique to this protein): TRUE

SEQUEST XCorr score: 2.03 SEQUEST DCn score: 0.442

Fix modifications: C13: Carbamidomethyl (+57.02)

Variable modifications: None

charge: 2 Observed m/z: 785.9143

Actual minus calculated peptide mass (AMU): -0.0056153

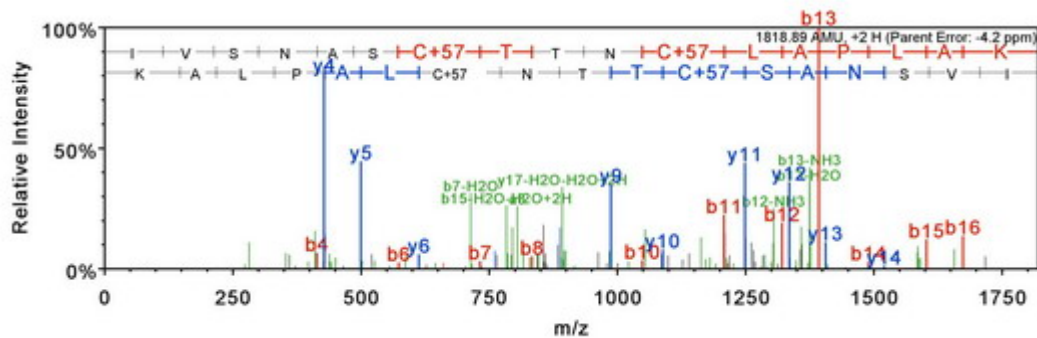

| B  | B Ions | B+2H  | B-NH3  | B-H2O  | AA   | Y Ions | Y+2H  | Y-NH3  | Y-H2O  | Y  |
|----|--------|-------|--------|--------|------|--------|-------|--------|--------|----|
| 1  | 114.1  |       |        |        | I    | 1819.9 | 910.5 | 1802.9 | 1801.9 | 17 |
| 2  | 213.2  |       |        |        | V    | 1706.8 | 853.9 | 1689.8 | 1688.8 | 16 |
| 3  | 300.2  |       |        | 282.2  | S    | 1607.8 | 804.4 | 1590.7 | 1589.7 | 15 |
| 4  | 414.2  |       | 397.2  | 396.2  | N    | 1520.7 | 760.9 | 1503.7 | 1502.7 | 14 |
| 5  | 485.3  |       | 468.3  | 467.3  | A    | 1406.7 | 703.8 | 1389.7 | 1388.7 | 13 |
| 6  | 572.3  | 286.7 | 555.3  | 554.3  | S    | 1335.6 | 668.3 | 1318.6 | 1317.6 | 12 |
| 7  | 732.3  | 366.7 | 715.3  | 714.3  | C+57 | 1248.6 | 624.8 | 1231.6 | 1230.6 | 11 |
| 8  | 833.4  | 417.2 | 816.4  | 815.4  | T    | 1088.6 | 544.8 | 1071.5 | 1070.6 | 10 |
| 9  | 934.4  | 467.7 | 917.4  | 916.4  | T    | 987.5  | 494.3 | 970.5  | 969.5  | 9  |
| 10 | 1048.5 | 524.7 | 1031.5 | 1030.5 | N    | 886.5  | 443.8 | 869.5  |        | 8  |
| 11 | 1208.5 | 604.8 | 1191.5 | 1190.5 | C+57 | 772.4  | 386.7 | 755.4  |        | 7  |
| 12 | 1321.6 | 661.3 | 1304.6 | 1303.6 | L    | 612.4  | 306.7 | 595.4  |        | 6  |
| 13 | 1392.6 | 696.8 | 1375.6 | 1374.6 | A    | 499.3  |       | 482.3  |        | 5  |
| 14 | 1489.7 | 745.3 | 1472.7 | 1471.7 | P    | 428.3  |       | 411.3  |        | 4  |
| 15 | 1602.8 | 801.9 | 1585.7 | 1584.8 | L    | 331.2  |       | 314.2  |        | 3  |
| 16 | 1673.8 | 837.4 | 1656.8 | 1655.8 | A    | 218.2  |       | 201.1  |        | 2  |
| 17 | 1819.9 | 910.5 | 1802.9 | 1801.9 | K    | 147.1  |       | 130.1  |        | 1  |

Gene symbol: -

Protein name: similar to ribosomal protein L21

Protein accession numbers: IPI00661977

Peptide sequence: (R)VYNVTQHAVGIIVNK(Q)

Exclusive (unique to this protein): TRUE

SEQUEST XCorr score: 2.01 SEQUEST DCn score: 0.682

Fix modifications: None

Variable modifications: None

charge: 2

Observed m/z: 827.9692

Actual minus calculated peptide mass (AMU): 0.002686

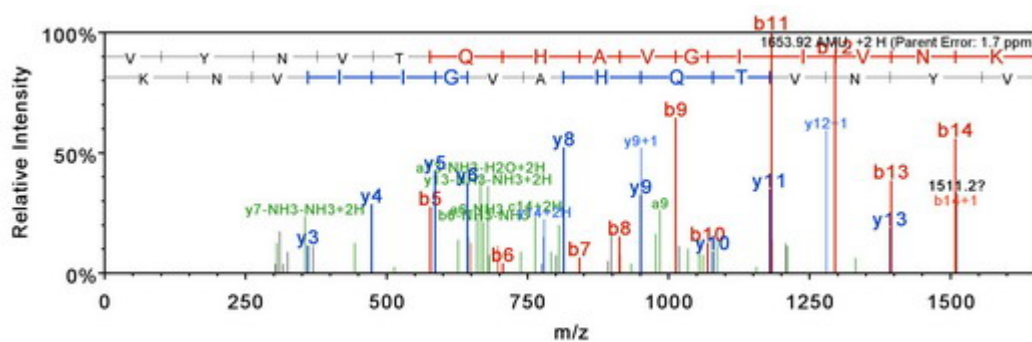

| B  | B ions | B+2H  | B-NH3  | B-H2O  | AA | Y ions | Y+2H  | Y-NH3  | Y-H2O  | Y  |
|----|--------|-------|--------|--------|----|--------|-------|--------|--------|----|
| 1  | 100.1  |       |        |        | V  | 1654.9 | 828.0 | 1637.9 | 1636.9 | 15 |
| 2  | 263.1  |       |        |        | Y  | 1555.9 | 778.4 | 1538.8 | 1537.9 | 14 |
| 3  | 377.2  |       | 360.2  |        | N  | 1392.8 | 696.9 | 1375.8 | 1374.8 | 13 |
| 4  | 476.3  |       | 459.2  |        | V  | 1278.8 | 639.9 | 1261.7 | 1260.7 | 12 |
| 5  | 577.3  |       | 560.3  | 559.3  | T  | 1179.7 | 590.4 | 1162.7 | 1161.7 | 11 |
| 6  | 705.4  | 353.2 | 688.3  | 687.4  | Q  | 1078.6 | 539.8 | 1061.6 |        | 10 |
| 7  | 842.4  | 421.7 | 825.4  | 824.4  | H  | 950.6  | 475.8 | 933.6  |        | 9  |
| 8  | 913.5  | 457.2 | 896.4  | 895.4  | A  | 813.5  | 407.3 | 796.5  |        | 8  |
| 9  | 1012.5 | 506.8 | 995.5  | 994.5  | V  | 742.5  | 371.8 | 725.5  |        | 7  |
| 10 | 1069.5 | 535.3 | 1052.5 | 1051.5 | G  | 643.4  | 322.2 | 626.4  |        | 6  |
| 11 | 1182.6 | 591.8 | 1165.6 | 1164.6 | I  | 586.4  |       | 569.4  |        | 5  |
| 12 | 1295.7 | 648.4 | 1278.7 | 1277.7 | I  | 473.3  |       | 456.3  |        | 4  |
| 13 | 1394.8 | 697.9 | 1377.8 | 1376.8 | V  | 360.2  |       | 343.2  |        | 3  |
| 14 | 1508.8 | 754.9 | 1491.8 | 1490.8 | N  | 261.2  |       | 244.1  |        | 2  |
| 15 | 1654.9 | 828.0 | 1637.9 | 1636.9 | K  | 147.1  |       | 130.1  |        | 1  |

Gene symbol: 0610008C08Rik

Protein name: similar to Novel transmembrane domain containing protein

Protein accession numbers: IPI00807819

Peptide sequence: (R)TQLEENISQLR(H)

Exclusive (unique to this protein): TRUE

SEQUEST XCorr score: 2.47 SEQUEST DCn score: 0.442

Fix modifications: None

Variable modifications: None

charge: 2

Observed m/z: 665.8524

Actual minus calculated peptide mass (AMU): 0.0002441

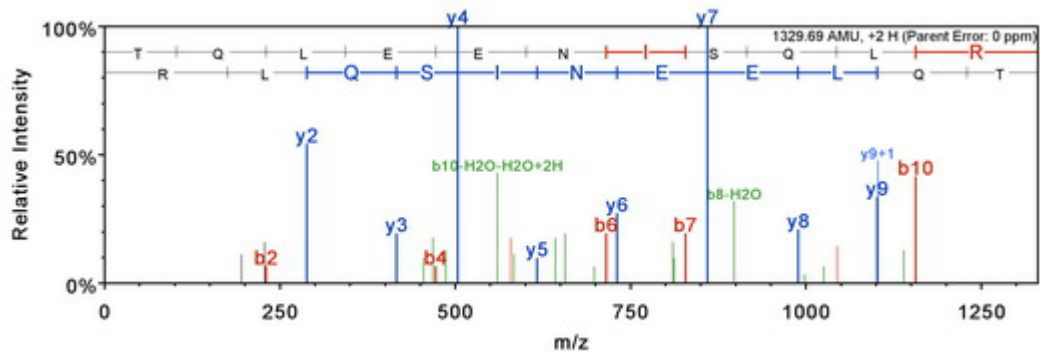

| B  | B ions | B+2H  | B-NH3  | B-H2O  | AA | Y ions | Y+2H  | Y-NH3  | Y-H2O  | Y  |
|----|--------|-------|--------|--------|----|--------|-------|--------|--------|----|
| 1  | 102.1  |       |        | 84.0   | T  | 1330.7 | 665.9 | 1313.7 | 1312.7 | 11 |
| 2  | 230.1  |       | 213.1  | 212.1  | Q  | 1229.7 | 615.3 | 1212.6 | 1211.6 | 10 |
| 3  | 343.2  |       | 326.2  | 325.2  | L  | 1101.6 | 551.3 | 1084.6 | 1083.6 | 9  |
| 4  | 472.2  |       | 455.2  | 454.2  | E  | 988.5  | 494.8 | 971.5  | 970.5  | 8  |
| 5  | 601.3  |       | 584.3  | 583.3  | E  | 859.5  | 430.2 | 842.4  | 841.5  | 7  |
| 6  | 715.3  | 358.2 | 698.3  | 697.3  | N  | 730.4  | 365.7 | 713.4  | 712.4  | 6  |
| 7  | 828.4  | 414.7 | 811.4  | 810.4  | I  | 616.4  |       | 599.4  | 598.4  | 5  |
| 8  | 915.4  | 458.2 | 898.4  | 897.4  | S  | 503.3  |       | 486.3  | 485.3  | 4  |
| 9  | 1043.5 | 522.3 | 1026.5 | 1025.5 | Q  | 416.3  |       | 399.2  |        | 3  |
| 10 | 1156.6 | 578.8 | 1139.6 | 1138.6 | L  | 288.2  |       | 271.2  |        | 2  |
| 11 | 1330.7 | 665.9 | 1313.7 | 1312.7 | R  | 175.1  |       | 158.1  |        | 1  |

Gene symbol: 1110007L15Rik

Protein name: Isoform 1 of UPF0363 protein C7orf20 homolog

Protein accession numbers: IPI00272521,IPI00742325

Peptide sequence: (K)AEVDVADELLENLAK(V)

Exclusive (unique to this protein): TRUE

SEQUEST XCorr score: 2.28 SEQUEST DCn score: 0.725

Fix modifications: None

Variable modifications: None

charge: 2

Observed m/z: 814.9244

Actual minus calculated peptide mass (AMU): 0.002564

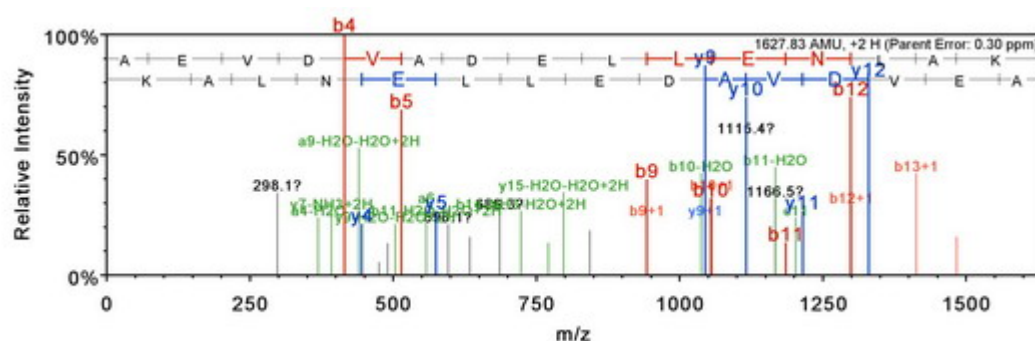

| B  | B ions | B+2H  | B-NH3  | B-H2O  | AA | Y ions | Y+2H  | Y-NH3  | Y-H2O  | Y  |
|----|--------|-------|--------|--------|----|--------|-------|--------|--------|----|
| 1  | 72.0   |       |        |        | A  | 1628.8 | 814.9 | 1611.8 | 1610.8 | 15 |
| 2  | 201.1  |       |        | 183.1  | E  | 1557.8 | 779.4 | 1540.8 | 1539.8 | 14 |
| 3  | 300.2  |       |        | 282.2  | V  | 1428.8 | 714.9 | 1411.7 | 1410.8 | 13 |
| 4  | 415.2  |       |        | 397.2  | D  | 1329.7 | 665.4 | 1312.7 | 1311.7 | 12 |
| 5  | 514.3  |       |        | 496.2  | V  | 1214.7 | 607.8 | 1197.6 | 1196.7 | 11 |
| 6  | 585.3  | 293.2 |        | 567.3  | A  | 1115.6 | 558.3 | 1098.6 | 1097.6 | 10 |
| 7  | 700.3  | 350.7 |        | 682.3  | D  | 1044.6 | 522.8 | 1027.5 | 1026.5 | 9  |
| 8  | 829.4  | 415.2 |        | 811.4  | E  | 929.5  | 465.3 | 912.5  | 911.5  | 8  |
| 9  | 942.4  | 471.7 |        | 924.4  | L  | 800.5  | 400.8 | 783.5  | 782.5  | 7  |
| 10 | 1055.5 | 528.3 |        | 1037.5 | L  | 687.4  | 344.2 | 670.4  | 669.4  | 6  |
| 11 | 1184.6 | 592.8 |        | 1166.6 | E  | 574.3  |       | 557.3  | 556.3  | 5  |
| 12 | 1298.6 | 649.8 | 1281.6 | 1280.6 | N  | 445.3  |       | 428.3  |        | 4  |
| 13 | 1411.7 | 706.4 | 1394.7 | 1393.7 | L  | 331.2  |       | 314.2  |        | 3  |
| 14 | 1482.7 | 741.9 | 1465.7 | 1464.7 | A  | 218.2  |       | 201.1  |        | 2  |
| 15 | 1628.8 | 814.9 | 1611.8 | 1610.8 | K  | 147.1  |       | 130.1  |        | 1  |

Gene symbol: 1500019G21Rik

Protein name: Hsp70-binding protein 1

Protein accession numbers: IPI00120257

Peptide sequence: (R)EQEAGLLQFLR(L)

Exclusive (unique to this protein): TRUE

SEQUEST XCorr score: 2 SEQUEST DCn score: 0.49

Fix modifications: None

Variable modifications: None

charge: 2

Observed m/z: 652.3553

Actual minus calculated peptide mass (AMU): 0.001709

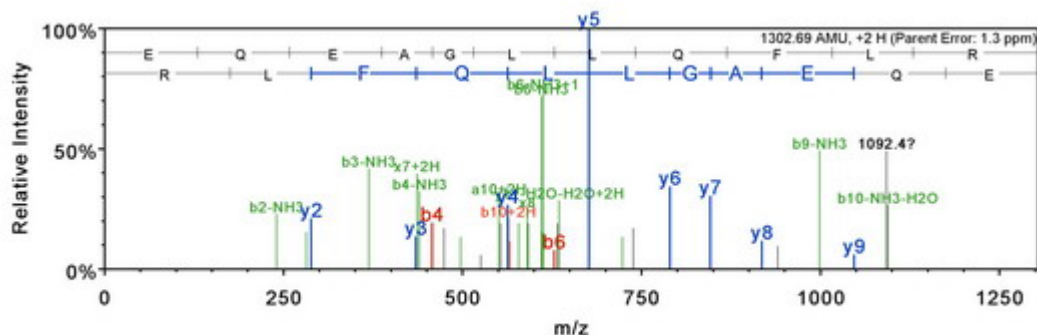

| B  | B ions | B+2H  | B-NH3  | B-H2O  | AA | Y ions | Y+2H  | Y-NH3  | Y-H2O  | Y  |
|----|--------|-------|--------|--------|----|--------|-------|--------|--------|----|
| 1  | 130.1  |       |        | 112.0  | E  | 1303.7 | 652.4 | 1286.7 | 1285.7 | 11 |
| 2  | 258.1  |       | 241.1  | 240.1  | Q  | 1174.7 | 587.8 | 1157.6 | 1156.7 | 10 |
| 3  | 387.2  |       | 370.1  | 369.1  | E  | 1046.6 | 523.8 | 1029.6 | 1028.6 | 9  |
| 4  | 458.2  |       | 441.2  | 440.2  | A  | 917.6  | 459.3 | 900.5  |        | 8  |
| 5  | 515.2  |       | 498.2  | 497.2  | G  | 846.5  | 423.8 | 829.5  |        | 7  |
| 6  | 628.3  | 314.7 | 611.3  | 610.3  | L  | 789.5  | 395.3 | 772.5  |        | 6  |
| 7  | 741.4  | 371.2 | 724.4  | 723.4  | L  | 676.4  |       | 659.4  |        | 5  |
| 8  | 869.4  | 435.2 | 852.4  | 851.4  | Q  | 563.3  |       | 546.3  |        | 4  |
| 9  | 1016.5 | 508.8 | 999.5  | 998.5  | F  | 435.3  |       | 418.3  |        | 3  |
| 10 | 1129.6 | 565.3 | 1112.6 | 1111.6 | L  | 288.2  |       | 271.2  |        | 2  |
| 11 | 1303.7 | 652.4 | 1286.7 | 1285.7 | R  | 175.1  |       | 158.1  |        | 1  |

Gene symbol: 1700012G19Rik

Protein name: RIKEN cDNA 1700012G19 gene

Protein accession numbers: IPI00380195

Peptide sequence: (R)FIFDCVSQYGINPER(T)

Exclusive (unique to this protein): TRUE

SEQUEST XCorr score: 2.31 SEQUEST DCn score: 0.71

Fix modifications: C5: Carbamidomethyl (+57.02)

Variable modifications: None

charge: 2

Observed m/z: 987.4552

Actual minus calculated peptide mass (AMU): -0.004273

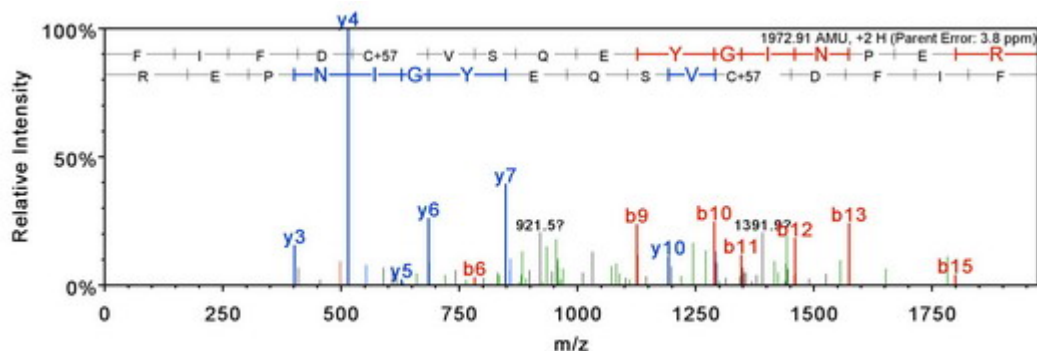



| B  | B Ions | B+2H  | B-NH3  | B-H2O  | AA   | Y Ions | Y+2H  | Y-NH3  | Y-H2O  | Y  |
|----|--------|-------|--------|--------|------|--------|-------|--------|--------|----|
| 1  | 148.1  |       |        |        | F    | 1973.9 | 987.5 | 1956.9 | 1955.9 | 16 |
| 2  | 261.2  |       |        |        | I    | 1826.8 | 913.9 | 1809.8 | 1808.8 | 15 |
| 3  | 408.2  |       |        |        | F    | 1713.8 | 857.4 | 1696.7 | 1695.7 | 14 |
| 4  | 523.3  |       |        | 505.3  | D    | 1566.7 | 783.9 | 1549.7 | 1548.7 | 13 |
| 5  | 683.3  |       |        | 665.3  | C+57 | 1451.7 | 726.3 | 1434.6 | 1433.7 | 12 |
| 6  | 782.4  | 391.7 |        | 764.3  | V    | 1291.6 | 646.3 | 1274.6 | 1273.6 | 11 |
| 7  | 869.4  | 435.2 |        | 851.4  | S    | 1192.6 | 596.8 | 1175.5 | 1174.5 | 10 |
| 8  | 997.5  | 499.2 | 980.4  | 979.4  | Q    | 1105.5 | 553.3 | 1088.5 | 1087.5 | 9  |
| 9  | 1126.5 | 563.8 | 1109.5 | 1108.5 | E    | 977.5  | 489.2 | 960.4  | 959.5  | 8  |
| 10 | 1289.5 | 645.3 | 1272.5 | 1271.5 | Y    | 848.4  | 424.7 | 831.4  | 830.4  | 7  |
| 11 | 1346.6 | 673.8 | 1329.5 | 1328.6 | G    | 685.4  | 343.2 | 668.3  | 667.4  | 6  |
| 12 | 1459.7 | 730.3 | 1442.6 | 1441.7 | I    | 628.3  |       | 611.3  | 610.3  | 5  |
| 13 | 1573.7 | 787.4 | 1556.7 | 1555.7 | N    | 515.3  |       | 498.2  | 497.3  | 4  |
| 14 | 1670.8 | 835.9 | 1653.7 | 1652.7 | P    | 401.2  |       | 384.2  | 383.2  | 3  |
| 15 | 1799.8 | 900.4 | 1782.8 | 1781.8 | E    | 304.2  |       | 287.1  | 286.2  | 2  |
| 16 | 1973.9 | 987.5 | 1956.9 | 1955.9 | R    | 175.1  |       | 158.1  |        | 1  |

Gene symbol: 2410014A08Rik

Protein name: Uncharacterized protein KIAA0152 precursor

Protein accession numbers: IPI00312018

Peptide sequence: (R)STPEDQILYQTER(Y)

Exclusive (unique to this protein): TRUE

SEQUEST XCorr score: 3.15 SEQUEST DCn score: 0.657

Fix modifications: None

Variable modifications: None

charge: 2

Observed m/z: 790.3846

Actual minus calculated peptide mass (AMU): 0.0008545

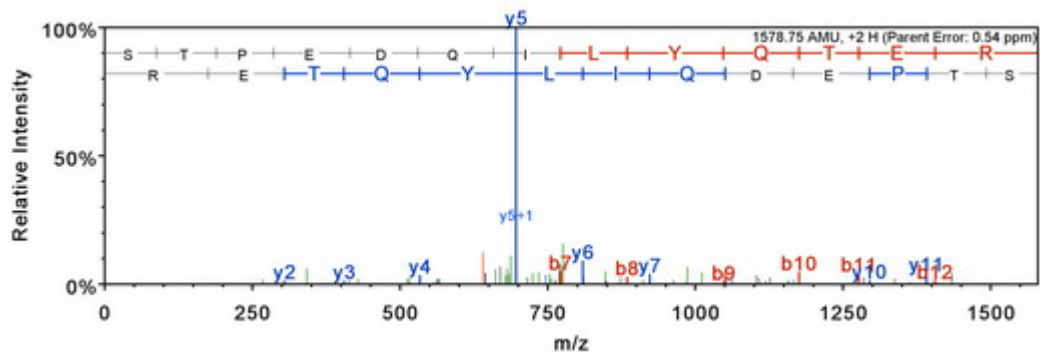

| B  | B Ions | B+2H  | B-NH3  | B-H2O  | AA | Y Ions | Y+2H  | Y-NH3  | Y-H2O  | Y  |
|----|--------|-------|--------|--------|----|--------|-------|--------|--------|----|
| 1  | 88.0   |       |        | 70.0   | S  | 1579.8 | 790.4 | 1562.7 | 1561.8 | 13 |
| 2  | 189.1  |       |        | 171.1  | T  | 1492.7 | 746.9 | 1475.7 | 1474.7 | 12 |
| 3  | 286.1  |       |        | 268.1  | P  | 1391.7 | 696.3 | 1374.7 | 1373.7 | 11 |
| 4  | 415.2  |       |        | 397.2  | E  | 1294.6 | 647.8 | 1277.6 | 1276.6 | 10 |
| 5  | 530.2  |       |        | 512.2  | D  | 1165.6 | 583.3 | 1148.6 | 1147.6 | 9  |
| 6  | 658.3  | 329.6 | 641.2  | 640.3  | Q  | 1050.6 | 525.8 | 1033.5 | 1032.5 | 8  |
| 7  | 771.4  | 386.2 | 754.3  | 753.3  | I  | 922.5  | 461.8 | 905.5  | 904.5  | 7  |
| 8  | 884.4  | 442.7 | 867.4  | 866.4  | L  | 809.4  | 405.2 | 792.4  | 791.4  | 6  |
| 9  | 1047.5 | 524.3 | 1030.5 | 1029.5 | Y  | 696.3  |       | 679.3  | 678.3  | 5  |
| 10 | 1175.6 | 588.3 | 1158.5 | 1157.5 | Q  | 533.3  |       | 516.2  | 515.3  | 4  |
| 11 | 1276.6 | 638.8 | 1259.6 | 1258.6 | T  | 405.2  |       | 388.2  | 387.2  | 3  |
| 12 | 1405.7 | 703.3 | 1388.6 | 1387.6 | E  | 304.2  |       | 287.1  | 286.2  | 2  |
| 13 | 1579.8 | 790.4 | 1562.7 | 1561.8 | R  | 175.1  |       | 158.1  |        | 1  |

Gene symbol: 2610019P18Rik

Protein name: 10 days embryo whole body cDNA, RIKEN full-length enriched library, clone:2610019P18 product:hypothetical protein, full insert sequence

Protein accession numbers: IPI00224957

Peptide sequence: (K)ISDGQEEADDEEEEEEEEEITK(T)

Exclusive (unique to this protein): TRUE

SEQUEST XCorr score: 2.41 SEQUEST DCn score: 0.793

Fix modifications: None

Variable modifications: None

charge: 2

Observed m/z: 1227.0017

Actual minus calculated peptide mass (AMU): 0.010458

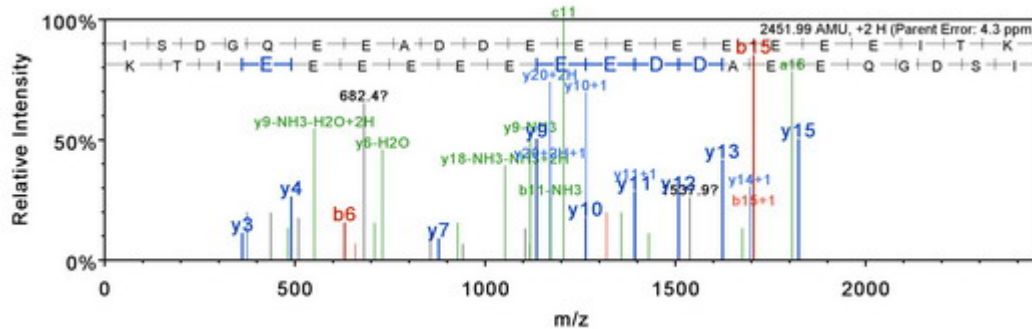

| B  | B Ions | B+2H   | B-NH3  | B-H2O  | AA | Y Ions | Y+2H   | Y-NH3  | Y-H2O  | Y  |
|----|--------|--------|--------|--------|----|--------|--------|--------|--------|----|
| 1  | 114.1  |        |        |        | I  | 2453.0 | 1227.0 | 2436.0 | 2435.0 | 21 |
| 2  | 201.1  |        |        | 183.1  | S  | 2339.9 | 1170.5 | 2322.9 | 2321.9 | 20 |
| 3  | 316.2  |        |        | 298.1  | D  | 2252.9 | 1126.9 | 2235.8 | 2234.9 | 19 |
| 4  | 373.2  |        |        | 355.2  | G  | 2137.8 | 1069.4 | 2120.8 | 2119.8 | 18 |
| 5  | 501.2  |        | 484.2  | 483.2  | Q  | 2080.8 | 1040.9 | 2063.8 | 2062.8 | 17 |
| 6  | 630.3  | 315.6  | 613.3  | 612.3  | E  | 1952.8 | 976.9  | 1935.7 | 1934.8 | 16 |
| 7  | 759.3  | 380.2  | 742.3  | 741.3  | E  | 1823.7 | 912.4  | 1806.7 | 1805.7 | 15 |
| 8  | 830.4  | 415.7  | 813.3  | 812.3  | A  | 1694.7 | 847.8  | 1677.7 | 1676.7 | 14 |
| 9  | 945.4  | 473.2  | 928.4  | 927.4  | D  | 1623.6 | 812.3  | 1606.6 | 1605.6 | 13 |
| 10 | 1060.4 | 530.7  | 1043.4 | 1042.4 | D  | 1508.6 | 754.8  | 1491.6 | 1490.6 | 12 |
| 11 | 1189.5 | 595.2  | 1172.4 | 1171.4 | E  | 1393.6 | 697.3  | 1376.6 | 1375.6 | 11 |
| 12 | 1318.5 | 659.8  | 1301.5 | 1300.5 | E  | 1264.5 | 632.8  | 1247.5 | 1246.5 | 10 |
| 13 | 1447.5 | 724.3  | 1430.5 | 1429.5 | E  | 1135.5 | 568.3  | 1118.5 | 1117.5 | 9  |
| 14 | 1576.6 | 788.8  | 1559.5 | 1558.6 | E  | 1006.5 | 503.7  | 989.4  | 988.5  | 8  |
| 15 | 1705.6 | 853.3  | 1688.6 | 1687.6 | E  | 877.4  | 439.2  | 860.4  | 859.4  | 7  |
| 16 | 1834.7 | 917.8  | 1817.6 | 1816.7 | E  | 748.4  | 374.7  | 731.4  | 730.4  | 6  |
| 17 | 1963.7 | 982.4  | 1946.7 | 1945.7 | E  | 619.3  |        | 602.3  | 601.3  | 5  |
| 18 | 2092.8 | 1046.9 | 2075.7 | 2074.7 | E  | 490.3  |        | 473.3  | 472.3  | 4  |
| 19 | 2205.8 | 1103.4 | 2188.8 | 2187.8 | I  | 361.3  |        | 344.2  | 343.2  | 3  |
| 20 | 2306.9 | 1153.9 | 2289.8 | 2288.9 | T  | 248.2  |        | 231.1  | 230.2  | 2  |
| 21 | 2453.0 | 1227.0 | 2436.0 | 2435.0 | K  | 147.1  |        | 130.1  |        | 1  |

Gene symbol: 2610030H06Rik

Protein name: ES cells cDNA, RIKEN full-length enriched library, clone:C330020E23  
product:similar to RNA BINDING PROTEIN

Protein accession numbers: IPI00132334,IPI00652117,IPI00762458

Peptide sequence: (K)AALNALQPPEFR(N)

Exclusive (unique to this protein): TRUE

SEQUEST XCorr score: 2.15 SEQUEST DCn score: 0.582

Fix modifications: None

Variable modifications: None

charge: 2

Observed m/z: 663.8586

Actual minus calculated peptide mass (AMU): -0.007568

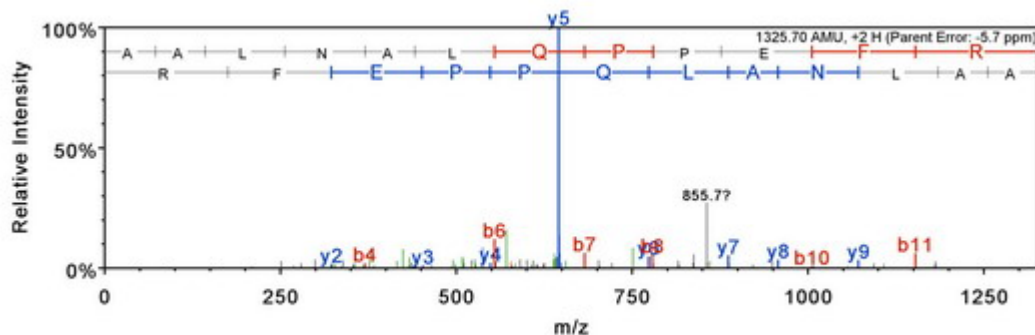

| B  | B Ions | B+2H  | B-NH3  | B-H2O  | AA | Y Ions | Y+2H  | Y-NH3  | Y-H2O  | Y  |
|----|--------|-------|--------|--------|----|--------|-------|--------|--------|----|
| 1  | 72.0   |       |        |        | A  | 1326.7 | 663.9 | 1309.7 | 1308.7 | 12 |
| 2  | 143.1  |       |        |        | A  | 1255.7 | 628.3 | 1238.7 | 1237.7 | 11 |
| 3  | 256.2  |       |        |        | L  | 1184.6 | 592.8 | 1167.6 | 1166.6 | 10 |
| 4  | 370.2  |       | 353.2  |        | N  | 1071.6 | 536.3 | 1054.5 | 1053.5 | 9  |
| 5  | 441.3  |       | 424.2  |        | A  | 957.5  | 479.3 | 940.5  | 939.5  | 8  |
| 6  | 554.3  | 277.7 | 537.3  |        | L  | 886.5  | 443.7 | 869.5  | 868.5  | 7  |
| 7  | 682.4  | 341.7 | 665.4  |        | Q  | 773.4  | 387.2 | 756.4  | 755.4  | 6  |
| 8  | 779.4  | 390.2 | 762.4  |        | P  | 645.3  |       | 628.3  | 627.3  | 5  |
| 9  | 876.5  | 438.8 | 859.5  |        | P  | 548.3  |       | 531.3  | 530.3  | 4  |
| 10 | 1005.5 | 503.3 | 988.5  | 987.5  | E  | 451.2  |       | 434.2  | 433.2  | 3  |
| 11 | 1152.6 | 576.8 | 1135.6 | 1134.6 | F  | 322.2  |       | 305.2  |        | 2  |
| 12 | 1326.7 | 663.9 | 1309.7 | 1308.7 | R  | 175.1  |       | 158.1  |        | 1  |

Gene symbol: 4930420K17Rik

Protein name: similar to chromosome 7 open reading frame 23 isoform 2

Protein accession numbers: IPI00752344,IPI00754821,IPI00755055

Peptide sequence: (R)TYGTSGLDNRPLFGETSAK(D)

Exclusive (unique to this protein): TRUE

SEQUEST XCorr score: 2.39 SEQUEST DCn score: 0.671

Fix modifications: None

Variable modifications: None

charge: 2

Observed m/z: 1007.5013

Actual minus calculated peptide mass (AMU): 0.0063456

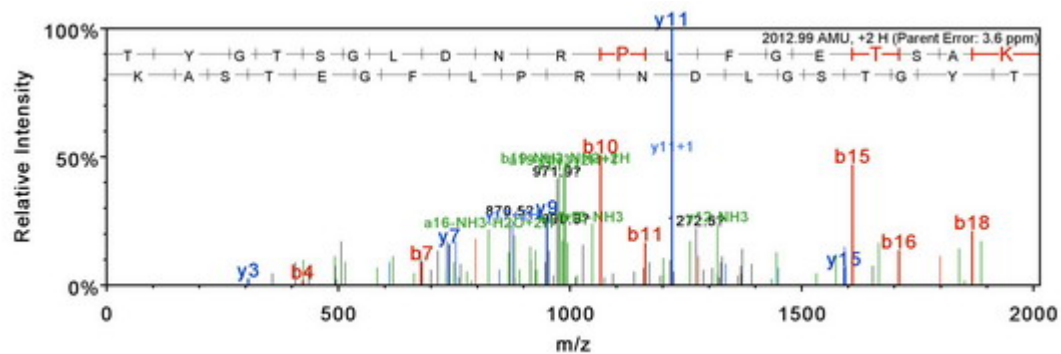

| B  | B Ions | B+2H   | B-NH3  | B-H2O  | AA | Y Ions | Y+2H   | Y-NH3  | Y-H2O  | Y  |
|----|--------|--------|--------|--------|----|--------|--------|--------|--------|----|
| 1  | 102.1  |        |        | 84.0   | T  | 2014.0 | 1007.5 | 1997.0 | 1996.0 | 19 |
| 2  | 265.1  |        |        | 247.1  | Y  | 1912.9 | 957.0  | 1895.9 | 1894.9 | 18 |
| 3  | 322.1  |        |        | 304.1  | G  | 1749.9 | 875.4  | 1732.9 | 1731.9 | 17 |
| 4  | 423.2  |        |        | 405.2  | T  | 1692.9 | 846.9  | 1675.8 | 1674.9 | 16 |
| 5  | 510.2  |        |        | 492.2  | S  | 1591.8 | 796.4  | 1574.8 | 1573.8 | 15 |
| 6  | 567.2  | 284.1  |        | 549.2  | G  | 1504.8 | 752.9  | 1487.8 | 1486.8 | 14 |
| 7  | 680.3  | 340.7  |        | 662.3  | L  | 1447.8 | 724.4  | 1430.7 | 1429.7 | 13 |
| 8  | 795.4  | 398.2  |        | 777.3  | D  | 1334.7 | 667.8  | 1317.6 | 1316.7 | 12 |
| 9  | 909.4  | 455.2  | 892.4  | 891.4  | N  | 1219.6 | 610.3  | 1202.6 | 1201.6 | 11 |
| 10 | 1065.5 | 533.3  | 1048.5 | 1047.5 | R  | 1105.6 | 553.3  | 1088.6 | 1087.6 | 10 |
| 11 | 1162.5 | 581.8  | 1145.5 | 1144.5 | P  | 949.5  | 475.3  | 932.5  | 931.5  | 9  |
| 12 | 1275.6 | 638.3  | 1258.6 | 1257.6 | L  | 852.5  | 426.7  | 835.4  | 834.4  | 8  |
| 13 | 1422.7 | 711.9  | 1405.7 | 1404.7 | F  | 739.4  | 370.2  | 722.3  | 721.4  | 7  |
| 14 | 1479.7 | 740.4  | 1462.7 | 1461.7 | G  | 592.3  | 296.7  | 575.3  | 574.3  | 6  |
| 15 | 1608.8 | 804.9  | 1591.7 | 1590.8 | E  | 535.3  |        | 518.3  | 517.3  | 5  |
| 16 | 1709.8 | 855.4  | 1692.8 | 1691.8 | T  | 406.2  |        | 389.2  | 388.2  | 4  |
| 17 | 1796.9 | 898.9  | 1779.8 | 1778.8 | S  | 305.2  |        | 288.2  | 287.2  | 3  |
| 18 | 1867.9 | 934.5  | 1850.9 | 1849.9 | A  | 218.2  |        | 201.1  |        | 2  |
| 19 | 2014.0 | 1007.5 | 1997.0 | 1996.0 | K  | 147.1  |        | 130.1  |        | 1  |

Gene symbol: Aco1

Protein name: Cytoplasmic aconitase

Protein accession numbers: IPI00622780

Peptide sequence: (R)YQQAGLPLIVLAGK(E)

Exclusive (unique to this protein): TRUE

SEQUEST XCorr score: 2.1 SEQUEST DCn score: 0.446

Fix modifications: None

Variable modifications: None

charge: 2

Observed m/z: 735.935

Actual minus calculated peptide mass (AMU): -0.00647

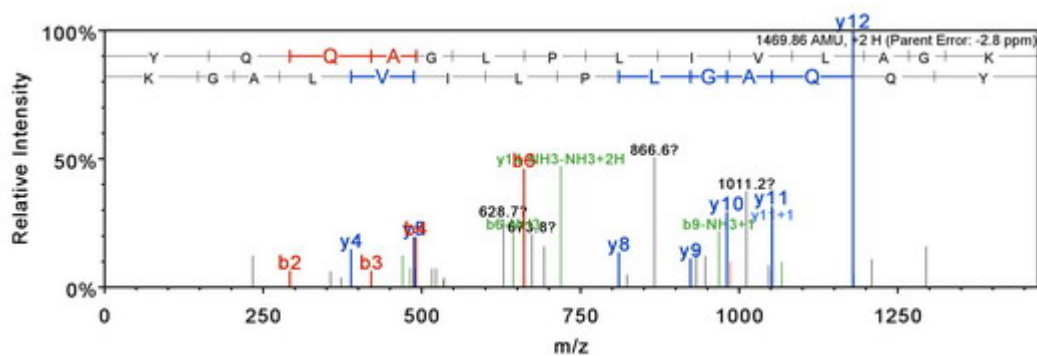

| B  | B Ions | B+2H  | B-NH3  | B-H2O | A,A | Y Ions | Y+2H  | Y-NH3  | Y-H2O | Y  |
|----|--------|-------|--------|-------|-----|--------|-------|--------|-------|----|
| 1  | 164.1  |       |        |       | Y   | 1470.9 | 735.9 | 1453.8 |       | 14 |
| 2  | 292.1  |       | 275.1  |       | Q   | 1307.8 | 654.4 | 1290.8 |       | 13 |
| 3  | 420.2  |       | 403.2  |       | Q   | 1179.8 | 590.4 | 1162.7 |       | 12 |
| 4  | 491.2  |       | 474.2  |       | A   | 1051.7 | 526.4 | 1034.7 |       | 11 |
| 5  | 548.3  |       | 531.2  |       | G   | 980.7  | 490.8 | 963.6  |       | 10 |
| 6  | 661.3  | 331.2 | 644.3  |       | L   | 923.6  | 462.3 | 906.6  |       | 9  |
| 7  | 758.4  | 379.7 | 741.4  |       | P   | 810.6  | 405.8 | 793.5  |       | 8  |
| 8  | 871.5  | 436.2 | 854.4  |       | L   | 713.5  | 357.3 | 696.5  |       | 7  |
| 9  | 984.6  | 492.8 | 967.5  |       | I   | 600.4  | 300.7 | 583.4  |       | 6  |
| 10 | 1083.6 | 542.3 | 1066.6 |       | V   | 487.3  |       | 470.3  |       | 5  |
| 11 | 1196.7 | 598.9 | 1179.7 |       | L   | 388.3  |       | 371.2  |       | 4  |
| 12 | 1267.7 | 634.4 | 1250.7 |       | A   | 275.2  |       | 258.1  |       | 3  |
| 13 | 1324.8 | 662.9 | 1307.7 |       | G   | 204.1  |       | 187.1  |       | 2  |
| 14 | 1470.9 | 735.9 | 1453.8 |       | K   | 147.1  |       | 130.1  |       | 1  |

Gene symbol: Acox3

Protein name: Acyl-coenzyme A oxidase 3, peroxisomal

Protein accession numbers: IPI00318108,IPI00404363

Peptide sequence: (R)TGNITSEGTYNSPFK(D)

Exclusive (unique to this protein): TRUE

SEQUEST XCorr score: 2.53 SEQUEST DCn score: 0.689

Fix modifications: None

Variable modifications: None

charge: 2

Observed m/z: 808.3798

Actual minus calculated peptide mass (AMU): -0.008789

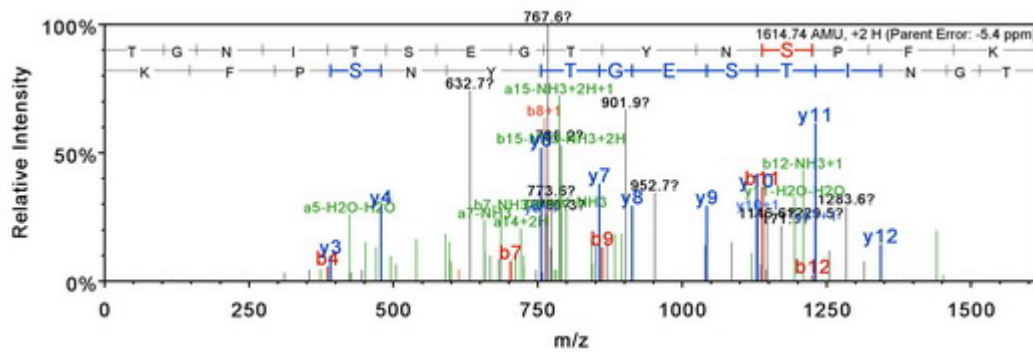

| B  | B Ions | B+2H  | B-NH3  | B-H2O  | AA | Y Ions | Y+2H  | Y-NH3  | Y-H2O  | Y  |
|----|--------|-------|--------|--------|----|--------|-------|--------|--------|----|
| 1  | 102.1  |       |        | 84.0   | T  | 1615.8 | 808.4 | 1598.7 | 1597.8 | 15 |
| 2  | 159.1  |       |        | 141.1  | G  | 1514.7 | 757.9 | 1497.7 | 1496.7 | 14 |
| 3  | 273.1  |       | 256.1  | 255.1  | N  | 1457.7 | 729.4 | 1440.7 | 1439.7 | 13 |
| 4  | 386.2  |       | 369.2  | 368.2  | I  | 1343.7 | 672.3 | 1326.6 | 1325.6 | 12 |
| 5  | 487.3  |       | 470.2  | 469.2  | T  | 1230.6 | 615.8 | 1213.5 | 1212.5 | 11 |
| 6  | 574.3  | 287.7 | 557.3  | 556.3  | S  | 1129.5 | 565.3 | 1112.5 | 1111.5 | 10 |
| 7  | 703.3  | 352.2 | 686.3  | 685.3  | E  | 1042.5 | 521.8 | 1025.5 | 1024.5 | 9  |
| 8  | 760.4  | 380.7 | 743.3  | 742.3  | G  | 913.4  | 457.2 | 896.4  | 895.4  | 8  |
| 9  | 861.4  | 431.2 | 844.4  | 843.4  | T  | 856.4  | 428.7 | 839.4  | 838.4  | 7  |
| 10 | 1024.5 | 512.7 | 1007.4 | 1006.5 | Y  | 755.4  | 378.2 | 738.4  | 737.4  | 6  |
| 11 | 1138.5 | 569.8 | 1121.5 | 1120.5 | N  | 592.3  |       | 575.3  | 574.3  | 5  |
| 12 | 1225.5 | 613.3 | 1208.5 | 1207.5 | S  | 478.3  |       | 461.2  | 460.3  | 4  |
| 13 | 1322.6 | 661.8 | 1305.6 | 1304.6 | P  | 391.2  |       | 374.2  |        | 3  |
| 14 | 1469.7 | 735.3 | 1452.6 | 1451.6 | F  | 294.2  |       | 277.2  |        | 2  |
| 15 | 1615.8 | 808.4 | 1598.7 | 1597.8 | K  | 147.1  |       | 130.1  |        | 1  |

Gene symbol: Acta1

Protein name: Actin, alpha skeletal muscle

Protein accession numbers: IPI00110827,IPI00114593,IPI00480406,IPI00653007,IPI00654242

Peptide sequence: (K)YPIEHGITNWDDMEK(I)

Exclusive (unique to this protein): TRUE

SEQUEST XCorr score: 2.01 SEQUEST DCn score: 0.533

Fix modifications: None

Variable modifications: M14: Oxidation (+16.00)

charge: 2 Observed m/z: 988.9535

Actual minus calculated peptide mass (AMU): -0.0074454

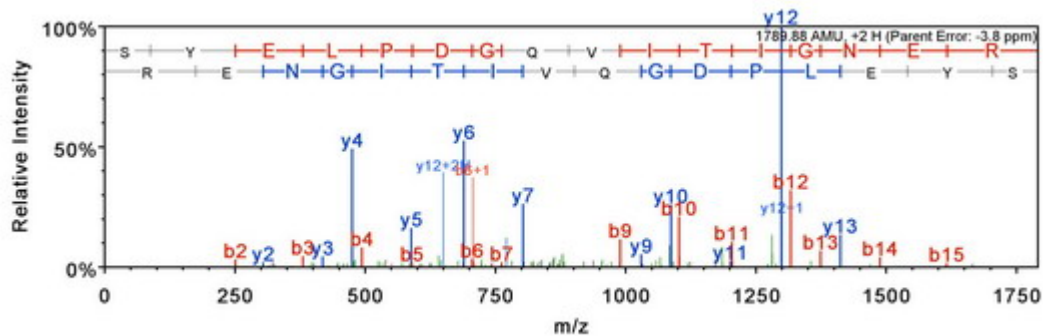

| B  | B Ions | B+2H  | B-NH3  | B-H2O  | AA | Y Ions | Y+2H  | Y-NH3  | Y-H2O  | Y  |
|----|--------|-------|--------|--------|----|--------|-------|--------|--------|----|
| 1  | 88.0   |       |        | 70.0   | S  | 1790.9 | 896.0 | 1773.9 | 1772.9 | 16 |
| 2  | 251.1  |       |        | 233.1  | Y  | 1703.9 | 852.4 | 1686.8 | 1685.9 | 15 |
| 3  | 380.2  |       |        | 362.1  | E  | 1540.8 | 770.9 | 1523.8 | 1522.8 | 14 |
| 4  | 493.2  |       |        | 475.2  | L  | 1411.8 | 706.4 | 1394.7 | 1393.7 | 13 |
| 5  | 590.3  |       |        | 572.3  | P  | 1298.7 | 649.8 | 1281.6 | 1280.7 | 12 |
| 6  | 705.3  | 353.2 |        | 687.3  | D  | 1201.6 | 601.3 | 1184.6 | 1183.6 | 11 |
| 7  | 762.3  | 381.7 |        | 744.3  | G  | 1086.6 | 543.8 | 1069.6 | 1068.6 | 10 |
| 8  | 890.4  | 445.7 | 873.4  | 872.4  | Q  | 1029.6 | 515.3 | 1012.5 | 1011.6 | 9  |
| 9  | 989.5  | 495.2 | 972.4  | 971.5  | V  | 901.5  | 451.3 | 884.5  | 883.5  | 8  |
| 10 | 1102.5 | 551.8 | 1085.5 | 1084.5 | I  | 802.4  | 401.7 | 785.4  | 784.4  | 7  |
| 11 | 1203.6 | 602.3 | 1186.6 | 1185.6 | T  | 689.4  | 345.2 | 672.3  | 671.4  | 6  |
| 12 | 1316.7 | 658.8 | 1299.7 | 1298.7 | I  | 588.3  |       | 571.3  | 570.3  | 5  |
| 13 | 1373.7 | 687.4 | 1356.7 | 1355.7 | G  | 475.2  |       | 458.2  | 457.2  | 4  |
| 14 | 1487.7 | 744.4 | 1470.7 | 1469.7 | N  | 418.2  |       | 401.2  | 400.2  | 3  |
| 15 | 1616.8 | 808.9 | 1599.8 | 1598.8 | E  | 304.2  |       | 287.1  | 286.2  | 2  |
| 16 | 1790.9 | 896.0 | 1773.9 | 1772.9 | R  | 175.1  |       | 158.1  |        | 1  |

Gene symbol: Actr2

Protein name: Actin-like protein 2

Protein accession numbers: IPI00177038,IPI00457901

Peptide sequence: (R)GYAFNHSADFETVR(M)

Exclusive (unique to this protein): TRUE

SEQUEST XCorr score: 2.11 SEQUEST DCn score: 0.44

Fix modifications: None

Variable modifications: None

charge: 2

Observed m/z: 807.3679

Actual minus calculated peptide mass (AMU): -0.0067152

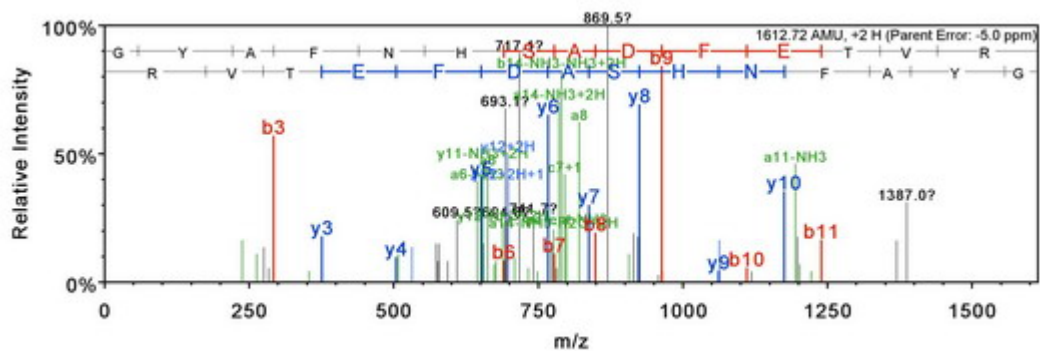



| B  | B Ions | B+2H  | B-NH3  | B-H2O  | A,A | Y Ions | Y+2H  | Y-NH3  | Y-H2O  | Y  |
|----|--------|-------|--------|--------|-----|--------|-------|--------|--------|----|
| 1  | 58.0   |       |        |        | G   | 1613.7 | 807.4 | 1596.7 | 1595.7 | 14 |
| 2  | 221.1  |       |        |        | Y   | 1556.7 | 778.9 | 1539.7 | 1538.7 | 13 |
| 3  | 292.1  |       |        |        | A   | 1393.7 | 697.3 | 1376.6 | 1375.6 | 12 |
| 4  | 439.2  |       |        |        | F   | 1322.6 | 661.8 | 1305.6 | 1304.6 | 11 |
| 5  | 553.2  |       | 536.2  |        | N   | 1175.5 | 588.3 | 1158.5 | 1157.5 | 10 |
| 6  | 690.3  | 345.7 | 673.3  |        | H   | 1061.5 | 531.3 | 1044.5 | 1043.5 | 9  |
| 7  | 777.3  | 389.2 | 760.3  | 759.3  | S   | 924.4  | 462.7 | 907.4  | 906.4  | 8  |
| 8  | 848.4  | 424.7 | 831.3  | 830.4  | A   | 837.4  | 419.2 | 820.4  | 819.4  | 7  |
| 9  | 963.4  | 482.2 | 946.4  | 945.4  | D   | 766.4  | 383.7 | 749.4  | 748.4  | 6  |
| 10 | 1110.5 | 555.7 | 1093.4 | 1092.5 | F   | 651.4  |       | 634.3  | 633.3  | 5  |
| 11 | 1239.5 | 620.3 | 1222.5 | 1221.5 | E   | 504.3  |       | 487.3  | 486.3  | 4  |
| 12 | 1340.5 | 670.8 | 1323.5 | 1322.5 | T   | 375.2  |       | 358.2  | 357.2  | 3  |
| 13 | 1439.6 | 720.3 | 1422.6 | 1421.6 | V   | 274.2  |       | 257.2  |        | 2  |
| 14 | 1613.7 | 807.4 | 1596.7 | 1595.7 | R   | 175.1  |       | 158.1  |        | 1  |

Gene symbol: Ada

Protein name: Adenosine deaminase

Protein accession numbers: IPI00261467

Peptide sequence: (R)VGHG YHTIEDEALYNGV

Exclusive (unique to this protein): TRUE

SEQUEST XCorr score: 2.25 SEQUEST DCn score: 0.583

Fix modifications: None

Variable modifications: None

charge: 2

Observed m/z: 937.4477

Actual minus calculated peptide mass (AMU): 0.004273

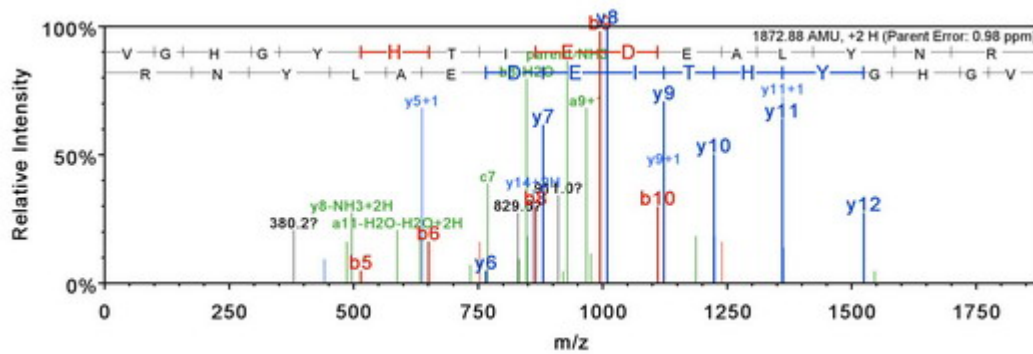

| B  | B Ions | B+2H  | B-NH3  | B-H2O  | AA | Y Ions | Y+2H  | Y-NH3  | Y-H2O  | Y  |
|----|--------|-------|--------|--------|----|--------|-------|--------|--------|----|
| 1  | 100.1  |       |        |        | V  | 1873.9 | 937.5 | 1856.9 | 1855.9 | 16 |
| 2  | 157.1  |       |        |        | G  | 1774.8 | 887.9 | 1757.8 | 1756.8 | 15 |
| 3  | 294.2  | 147.6 |        |        | H  | 1717.8 | 859.4 | 1700.8 | 1699.8 | 14 |
| 4  | 351.2  | 176.1 |        |        | G  | 1580.7 | 790.9 | 1563.7 | 1562.7 | 13 |
| 5  | 514.2  | 257.6 |        |        | Y  | 1523.7 | 762.4 | 1506.7 | 1505.7 | 12 |
| 6  | 651.3  | 326.2 |        |        | H  | 1360.7 | 680.8 | 1343.6 | 1342.6 | 11 |
| 7  | 752.4  | 376.7 |        | 734.3  | T  | 1223.6 | 612.3 | 1206.6 | 1205.6 | 10 |
| 8  | 865.4  | 433.2 |        | 847.4  | I  | 1122.5 | 561.8 | 1105.5 | 1104.5 | 9  |
| 9  | 994.5  | 497.7 |        | 976.5  | E  | 1009.5 | 505.2 | 992.4  | 991.5  | 8  |
| 10 | 1109.5 | 555.3 |        | 1091.5 | D  | 880.4  | 440.7 | 863.4  | 862.4  | 7  |
| 11 | 1238.5 | 619.8 |        | 1220.5 | E  | 765.4  | 383.2 | 748.4  | 747.4  | 6  |
| 12 | 1309.6 | 655.3 |        | 1291.6 | A  | 636.4  |       | 619.3  |        | 5  |
| 13 | 1422.7 | 711.8 |        | 1404.7 | L  | 565.3  |       | 548.3  |        | 4  |
| 14 | 1585.7 | 793.4 |        | 1567.7 | Y  | 452.2  |       | 435.2  |        | 3  |
| 15 | 1699.8 | 850.4 | 1682.8 | 1681.8 | N  | 289.2  |       | 272.1  |        | 2  |
| 16 | 1873.9 | 937.5 | 1856.9 | 1855.9 | R  | 175.1  |       | 158.1  |        | 1  |

Gene symbol: Adh5

Protein name: Alcohol dehydrogenase class 3

Protein accession numbers: IPI00555004

Peptide sequence: (K)AGDTVIPLYIPQCGECK(F)

Exclusive (unique to this protein): TRUE

SEQUEST XCorr score: 2.33 SEQUEST DCn score: 0.48

Fix modifications: C13: Carbamidomethyl (+57.02), C16: Carbamidomethyl (+57.02) Variable modifications: None

charge: 2

Observed m/z: 960.9618

Actual minus calculated peptide mass (AMU): -0.004395

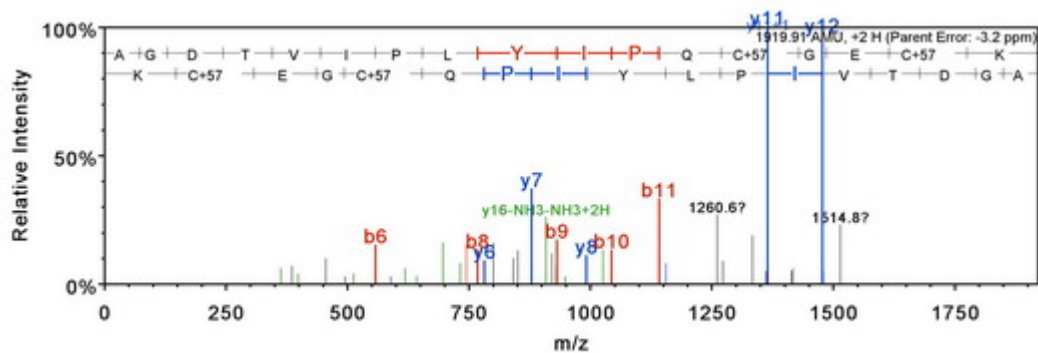

| B  | B Ions | B+2H  | B-NH3  | B-H2O  | AA   | Y Ions | Y+2H  | Y-NH3  | Y-H2O  | Y  |
|----|--------|-------|--------|--------|------|--------|-------|--------|--------|----|
| 1  | 72.0   |       |        |        | A    | 1920.9 | 961.0 | 1903.9 | 1902.9 | 17 |
| 2  | 129.1  |       |        |        | G    | 1849.9 | 925.5 | 1832.9 | 1831.9 | 16 |
| 3  | 244.1  |       |        | 226.1  | D    | 1792.9 | 896.9 | 1775.8 | 1774.9 | 15 |
| 4  | 345.1  |       |        | 327.1  | T    | 1677.8 | 839.4 | 1660.8 | 1659.8 | 14 |
| 5  | 444.2  |       |        | 426.2  | V    | 1576.8 | 788.9 | 1559.8 | 1558.8 | 13 |
| 6  | 557.3  | 279.2 |        | 539.3  | I    | 1477.7 | 739.4 | 1460.7 | 1459.7 | 12 |
| 7  | 654.4  | 327.7 |        | 636.3  | P    | 1364.6 | 682.8 | 1347.6 | 1346.6 | 11 |
| 8  | 767.4  | 384.2 |        | 749.4  | L    | 1267.6 | 634.3 | 1250.6 | 1249.6 | 10 |
| 9  | 930.5  | 465.8 |        | 912.5  | Y    | 1154.5 | 577.8 | 1137.5 | 1136.5 | 9  |
| 10 | 1043.6 | 522.3 |        | 1025.6 | I    | 991.4  | 496.2 | 974.4  | 973.4  | 8  |
| 11 | 1140.6 | 570.8 |        | 1122.6 | P    | 878.4  | 439.7 | 861.3  | 860.3  | 7  |
| 12 | 1268.7 | 634.9 | 1251.7 | 1250.7 | Q    | 781.3  | 391.2 | 764.3  | 763.3  | 6  |
| 13 | 1428.7 | 714.9 | 1411.7 | 1410.7 | C+57 | 653.2  |       | 636.2  | 635.2  | 5  |
| 14 | 1485.7 | 743.4 | 1468.7 | 1467.7 | G    | 493.2  |       | 476.2  | 475.2  | 4  |
| 15 | 1614.8 | 807.9 | 1597.8 | 1596.8 | E    | 436.2  |       | 419.2  | 418.2  | 3  |
| 16 | 1774.8 | 887.9 | 1757.8 | 1756.8 | C+57 | 307.1  |       | 290.1  |        | 2  |
| 17 | 1920.9 | 961.0 | 1903.9 | 1902.9 | K    | 147.1  |       | 130.1  |        | 1  |

Gene symbol: Adk

Protein name: Isoform Long of Adenosine kinase

Protein accession numbers: IPI00126940,IPI00138084

Peptide sequence: (R)SLVANLAAANCYK(K)

Exclusive (unique to this protein): TRUE

SEQUEST XCorr score: 3.11 SEQUEST DCn score: 0.725

Fix modifications: C11: Carbamidomethyl (+57.02)Variable modifications: None

charge: 2

Observed m/z: 697.8556

Actual minus calculated peptide mass (AMU): -0.006592

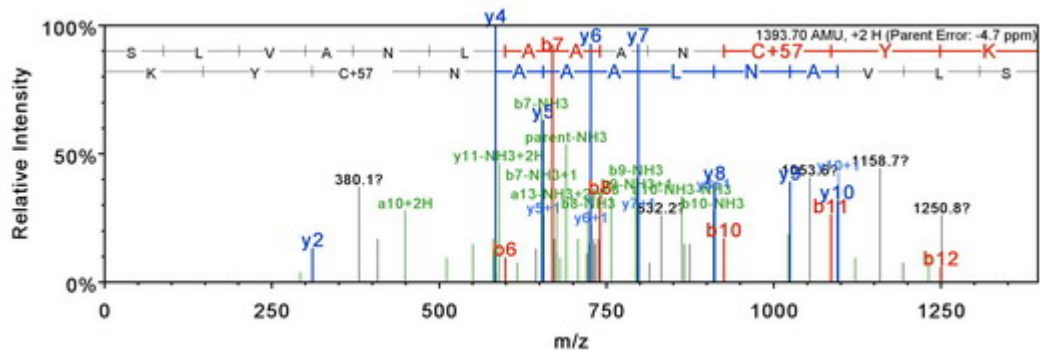

| B  | B Ions | B+2H  | B-NH3  | B-H2O  | AA   | Y Ions | Y+2H  | Y-NH3  | Y-H2O  | Y  |
|----|--------|-------|--------|--------|------|--------|-------|--------|--------|----|
| 1  | 88.0   |       |        | 70.0   | S    | 1394.7 | 697.9 | 1377.7 | 1376.7 | 13 |
| 2  | 201.1  |       |        | 183.1  | L    | 1307.7 | 654.3 | 1290.7 |        | 12 |
| 3  | 300.2  |       |        | 282.2  | V    | 1194.6 | 597.8 | 1177.6 |        | 11 |
| 4  | 371.2  |       |        | 353.2  | A    | 1095.5 | 548.3 | 1078.5 |        | 10 |
| 5  | 485.3  |       | 468.3  | 467.3  | N    | 1024.5 | 512.8 | 1007.5 |        | 9  |
| 6  | 598.4  | 299.7 | 581.3  | 580.4  | L    | 910.5  | 455.7 | 893.4  |        | 8  |
| 7  | 669.4  | 335.2 | 652.4  | 651.4  | A    | 797.4  | 399.2 | 780.3  |        | 7  |
| 8  | 740.4  | 370.7 | 723.4  | 722.4  | A    | 726.3  | 363.7 | 709.3  |        | 6  |
| 9  | 811.5  | 406.2 | 794.4  | 793.5  | A    | 655.3  |       | 638.3  |        | 5  |
| 10 | 925.5  | 463.3 | 908.5  | 907.5  | N    | 584.3  |       | 567.2  |        | 4  |
| 11 | 1085.5 | 543.3 | 1068.5 | 1067.5 | C+57 | 470.2  |       | 453.2  |        | 3  |
| 12 | 1248.6 | 624.8 | 1231.6 | 1230.6 | Y    | 310.2  |       | 293.2  |        | 2  |
| 13 | 1394.7 | 697.9 | 1377.7 | 1376.7 | K    | 147.1  |       | 130.1  |        | 1  |

Gene symbol: Adpgk

Protein name: Isoform 2 of ADP-dependent glucokinase

Protein accession numbers: IPI00556819

Peptide sequence: (R)LGPAPVPVGPLSPESR(L)

Exclusive (unique to this protein): TRUE

SEQUEST XCorr score: 2.09 SEQUEST DCn score: 0.46

Fix modifications: None

Variable modifications: None

charge: 2 Observed m/z: 786.938

Actual minus calculated peptide mass (AMU): -0.0070758

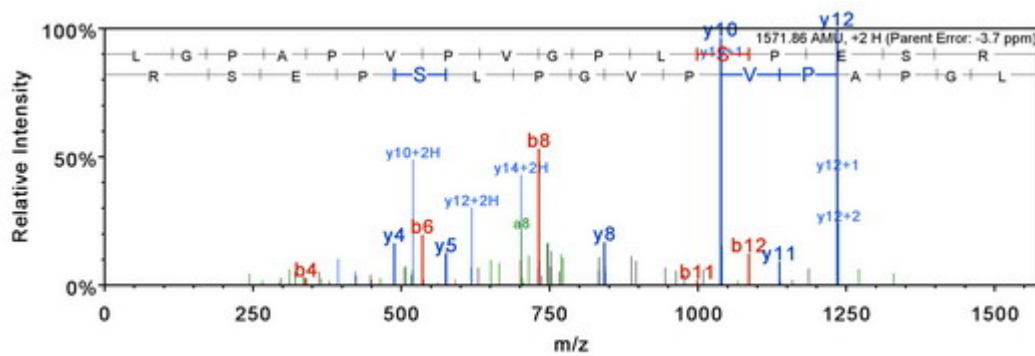

| B  | B Ions | B+2H  | B-NH3  | B-H2O  | AA | Y Ions | Y+2H  | Y-NH3  | Y-H2O  | Y  |
|----|--------|-------|--------|--------|----|--------|-------|--------|--------|----|
| 1  | 114.1  |       |        |        | L  | 1572.9 | 786.9 | 1555.9 | 1554.9 | 16 |
| 2  | 171.1  |       |        |        | G  | 1459.8 | 730.4 | 1442.8 | 1441.8 | 15 |
| 3  | 268.2  |       |        |        | P  | 1402.8 | 701.9 | 1385.7 | 1384.8 | 14 |
| 4  | 339.2  |       |        |        | A  | 1305.7 | 653.4 | 1288.7 | 1287.7 | 13 |
| 5  | 436.3  |       |        |        | P  | 1234.7 | 617.8 | 1217.7 | 1216.7 | 12 |
| 6  | 535.3  | 268.2 |        |        | V  | 1137.6 | 569.3 | 1120.6 | 1119.6 | 11 |
| 7  | 632.4  | 316.7 |        |        | P  | 1038.6 | 519.8 | 1021.5 | 1020.6 | 10 |
| 8  | 731.5  | 366.2 |        |        | V  | 941.5  | 471.3 | 924.5  | 923.5  | 9  |
| 9  | 788.5  | 394.7 |        |        | G  | 842.4  | 421.7 | 825.4  | 824.4  | 8  |
| 10 | 885.5  | 443.3 |        |        | P  | 785.4  | 393.2 | 768.4  | 767.4  | 7  |
| 11 | 998.6  | 499.8 |        |        | L  | 688.4  | 344.7 | 671.3  | 670.4  | 6  |
| 12 | 1085.6 | 543.3 |        | 1067.6 | S  | 575.3  |       | 558.3  | 557.3  | 5  |
| 13 | 1182.7 | 591.9 |        | 1164.7 | P  | 488.3  |       | 471.2  | 470.2  | 4  |
| 14 | 1311.7 | 656.4 |        | 1293.7 | E  | 391.2  |       | 374.2  | 373.2  | 3  |
| 15 | 1398.8 | 699.9 |        | 1380.8 | S  | 262.1  |       | 245.1  | 244.1  | 2  |
| 16 | 1572.9 | 786.9 | 1555.9 | 1554.9 | R  | 175.1  |       | 158.1  |        | 1  |

Gene symbol: Adsl

Protein name: Lung RCB-0558 LLC cDNA, RIKEN full-length enriched library,  
clone:G730029K06 product:adenylosuccinate lyase, full insert sequence

Protein accession numbers: IPI00265471,IPI00308217

Peptide sequence: (R)AFIITGQTYTR(K)

Exclusive (unique to this protein): TRUE

SEQUEST XCorr score: 2.85 SEQUEST DCn score: 0.637

Fix modifications: None

Variable modifications: None

charge: 2

Observed m/z: 635.8395

Actual minus calculated peptide mass (AMU): -0.0085453

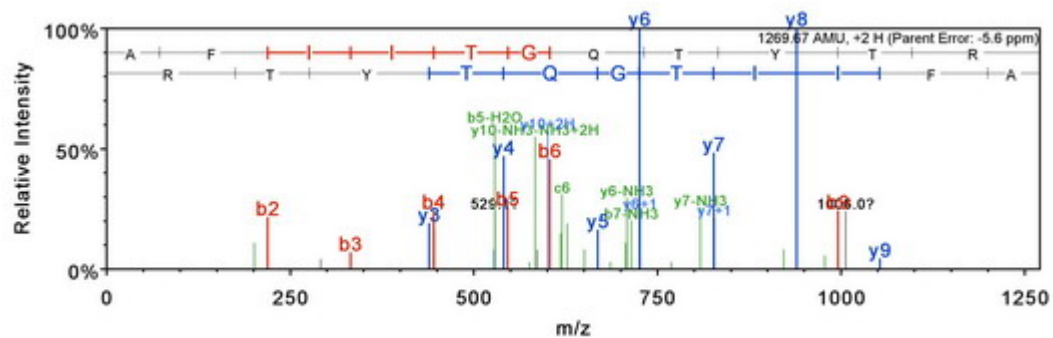

| B  | B Ions | B+2H  | B-NH3  | B-H2O  | AA | Y Ions | Y+2H  | Y-NH3  | Y-H2O  | Y  |
|----|--------|-------|--------|--------|----|--------|-------|--------|--------|----|
| 1  | 72.0   |       |        |        | A  | 1270.7 | 635.8 | 1253.7 | 1252.7 | 11 |
| 2  | 219.1  |       |        |        | F  | 1199.6 | 600.3 | 1182.6 | 1181.6 | 10 |
| 3  | 332.2  |       |        |        | I  | 1052.6 | 526.8 | 1035.5 | 1034.6 | 9  |
| 4  | 445.3  |       |        |        | I  | 939.5  | 470.3 | 922.5  | 921.5  | 8  |
| 5  | 546.3  |       |        | 528.3  | T  | 826.4  | 413.7 | 809.4  | 808.4  | 7  |
| 6  | 603.4  | 302.2 |        | 585.3  | G  | 725.4  | 363.2 | 708.3  | 707.4  | 6  |
| 7  | 731.4  | 366.2 | 714.4  | 713.4  | Q  | 668.3  |       | 651.3  | 650.3  | 5  |
| 8  | 832.5  | 416.7 | 815.4  | 814.5  | T  | 540.3  |       | 523.3  | 522.3  | 4  |
| 9  | 995.5  | 498.3 | 978.5  | 977.5  | Y  | 439.2  |       | 422.2  | 421.2  | 3  |
| 10 | 1096.6 | 548.8 | 1079.5 | 1078.6 | T  | 276.2  |       | 259.1  | 258.2  | 2  |
| 11 | 1270.7 | 635.8 | 1253.7 | 1252.7 | R  | 175.1  |       | 158.1  |        | 1  |

Gene symbol: AI316787

Protein name: Uncharacterized protein C17orf32 homolog

Protein accession numbers: IPI00265298

Peptide sequence: (R)NVTCQDAQCGGTLSDLGK(Q)

Exclusive (unique to this protein): TRUE

SEQUEST XCorr score: 2.06 SEQUEST DCn score: 0.617

Fix modifications: C4: Carbamidomethyl (+57.02), C9: Carbamidomethyl (+57.02) Variable modifications: None

charge: 2

Observed m/z: 962.433

Actual minus calculated peptide mass (AMU): 0.003662

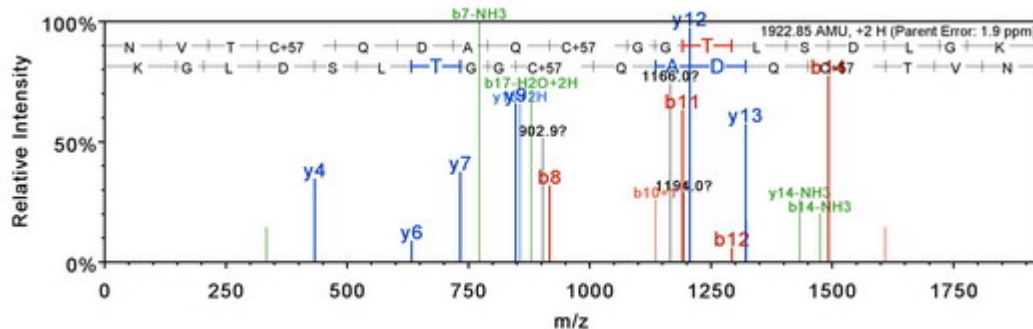

| B  | B Ions | B+2H  | B-NH3  | B-H2O  | AA   | Y Ions | Y+2H  | Y-NH3  | Y-H2O  | Y  |
|----|--------|-------|--------|--------|------|--------|-------|--------|--------|----|
| 1  | 115.1  |       | 98.0   |        | N    | 1923.9 | 962.4 | 1906.8 | 1905.8 | 18 |
| 2  | 214.1  |       | 197.1  |        | V    | 1809.8 | 905.4 | 1792.8 | 1791.8 | 17 |
| 3  | 315.2  |       | 298.1  | 297.2  | T    | 1710.7 | 855.9 | 1693.7 | 1692.7 | 16 |
| 4  | 475.2  |       | 458.2  | 457.2  | C+57 | 1609.7 | 805.4 | 1592.7 | 1591.7 | 15 |
| 5  | 603.3  |       | 586.2  | 585.3  | Q    | 1449.7 | 725.3 | 1432.6 | 1431.7 | 14 |
| 6  | 718.3  | 359.7 | 701.3  | 700.3  | D    | 1321.6 | 661.3 | 1304.6 | 1303.6 | 13 |
| 7  | 789.3  | 395.2 | 772.3  | 771.3  | A    | 1206.6 | 603.8 | 1189.5 | 1188.6 | 12 |
| 8  | 917.4  | 459.2 | 900.4  | 899.4  | Q    | 1135.5 | 568.3 | 1118.5 | 1117.5 | 11 |
| 9  | 1077.4 | 539.2 | 1060.4 | 1059.4 | C+57 | 1007.5 | 504.3 | 990.5  | 989.5  | 10 |
| 10 | 1134.4 | 567.7 | 1117.4 | 1116.4 | G    | 847.5  | 424.2 | 830.4  | 829.4  | 9  |
| 11 | 1191.5 | 596.2 | 1174.4 | 1173.4 | G    | 790.4  | 395.7 | 773.4  | 772.4  | 8  |
| 12 | 1292.5 | 646.8 | 1275.5 | 1274.5 | T    | 733.4  | 367.2 | 716.4  | 715.4  | 7  |
| 13 | 1405.6 | 703.3 | 1388.6 | 1387.6 | L    | 632.4  | 316.7 | 615.3  | 614.4  | 6  |
| 14 | 1492.6 | 746.8 | 1475.6 | 1474.6 | S    | 519.3  |       | 502.3  | 501.3  | 5  |
| 15 | 1607.6 | 804.3 | 1590.6 | 1589.6 | D    | 432.3  |       | 415.2  | 414.2  | 4  |
| 16 | 1720.7 | 860.9 | 1703.7 | 1702.7 | L    | 317.2  |       | 300.2  |        | 3  |
| 17 | 1777.8 | 889.4 | 1760.7 | 1759.7 | G    | 204.1  |       | 187.1  |        | 2  |
| 18 | 1923.9 | 962.4 | 1906.8 | 1905.8 | K    | 147.1  |       | 130.1  |        | 1  |

Gene symbol: Amacr

Protein name: Alpha-methylacyl-CoA racemase

Protein accession numbers: IPI00114331,IPI00607025

Peptide sequence: (R)ASFITDGEQLPSR(P)

Exclusive (unique to this protein): TRUE

SEQUEST XCorr score: 2.01 SEQUEST DCn score: 0.655

Fix modifications: None

Variable modifications: None

charge: 2

Observed m/z: 759.3793

Actual minus calculated peptide mass (AMU): -0.009522

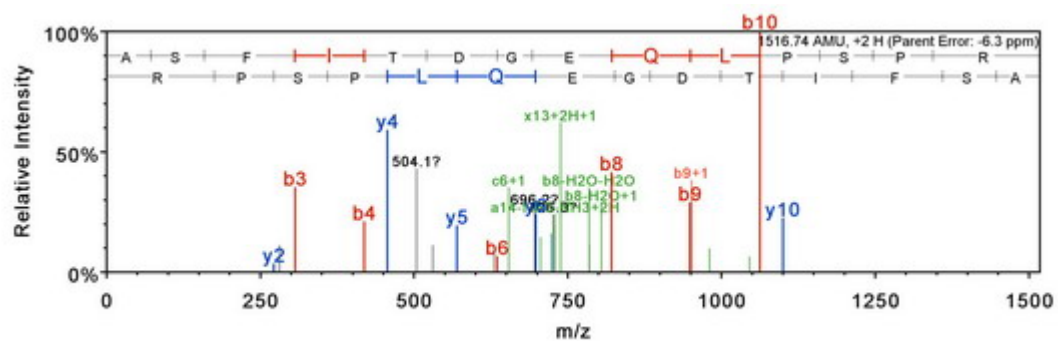

| B  | B ions | B+2H  | B-NH3  | B-H2O  | AA | Y ions | Y+2H  | Y-NH3  | Y-H2O  | Y  |
|----|--------|-------|--------|--------|----|--------|-------|--------|--------|----|
| 1  | 72.0   |       |        |        | A  | 1517.8 | 759.4 | 1500.7 | 1499.8 | 14 |
| 2  | 159.1  |       |        | 141.1  | S  | 1446.7 | 723.9 | 1429.7 | 1428.7 | 13 |
| 3  | 306.2  |       |        | 288.1  | F  | 1359.7 | 680.4 | 1342.7 | 1341.7 | 12 |
| 4  | 419.2  |       |        | 401.2  | I  | 1212.6 | 606.8 | 1195.6 | 1194.6 | 11 |
| 5  | 520.3  |       |        | 502.3  | T  | 1099.5 | 550.3 | 1082.5 | 1081.5 | 10 |
| 6  | 635.3  | 318.2 |        | 617.3  | D  | 998.5  | 499.8 | 981.5  | 980.5  | 9  |
| 7  | 692.3  | 346.7 |        | 674.3  | G  | 883.5  | 442.2 | 866.4  | 865.5  | 8  |
| 8  | 821.4  | 411.2 |        | 803.4  | E  | 826.4  | 413.7 | 809.4  | 808.4  | 7  |
| 9  | 949.4  | 475.2 | 932.4  | 931.4  | Q  | 697.4  | 349.2 | 680.4  | 679.4  | 6  |
| 10 | 1062.5 | 531.8 | 1045.5 | 1044.5 | L  | 569.3  |       | 552.3  | 551.3  | 5  |
| 11 | 1159.6 | 580.3 | 1142.5 | 1141.5 | P  | 456.3  |       | 439.2  | 438.3  | 4  |
| 12 | 1246.6 | 623.8 | 1229.6 | 1228.6 | S  | 359.2  |       | 342.2  | 341.2  | 3  |
| 13 | 1343.7 | 672.3 | 1326.6 | 1325.6 | P  | 272.2  |       | 255.2  |        | 2  |
| 14 | 1517.8 | 759.4 | 1500.7 | 1499.8 | R  | 175.1  |       | 158.1  |        | 1  |

Gene symbol: Ap2b1

Protein name: Isoform 1 of AP-2 complex subunit beta-1

Protein accession numbers: IPI00119689,IPI00378063

Peptide sequence: (R)LASQANIAQVLAELK(E)

Exclusive (unique to this protein): TRUE

SEQUEST XCorr score: 2.52 SEQUEST DCn score: 0.659

Fix modifications: None

Variable modifications: None

charge: 2 Observed m/z: 784.9516

Actual minus calculated peptide mass (AMU): -0.0059849

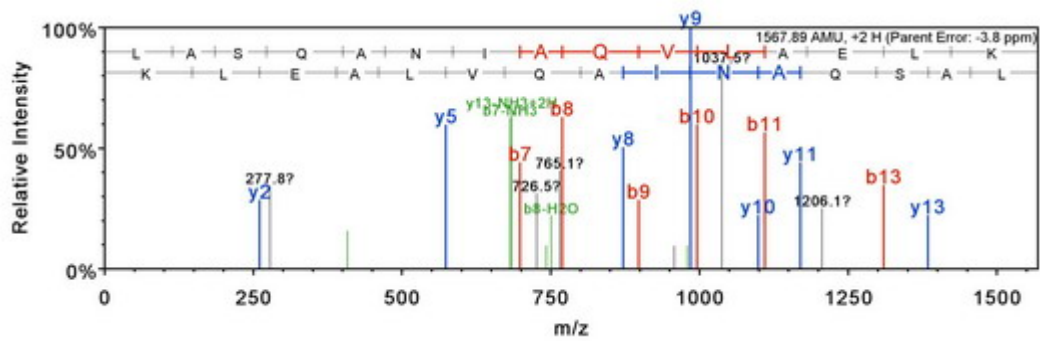



| B  | B Ions | B+2H  | B-NH3  | B-H2O  | AA | Y Ions | Y+2H  | Y-NH3  | Y-H2O  | Y  |
|----|--------|-------|--------|--------|----|--------|-------|--------|--------|----|
| 1  | 114.1  |       |        |        | L  | 1568.9 | 785.0 | 1551.9 | 1550.9 | 15 |
| 2  | 185.1  |       |        |        | A  | 1455.8 | 728.4 | 1438.8 | 1437.8 | 14 |
| 3  | 272.2  |       |        | 254.2  | S  | 1384.8 | 692.9 | 1367.8 | 1366.8 | 13 |
| 4  | 400.2  |       | 383.2  | 382.2  | Q  | 1297.8 | 649.4 | 1280.7 | 1279.7 | 12 |
| 5  | 471.3  |       | 454.2  | 453.3  | A  | 1169.7 | 585.4 | 1152.7 | 1151.7 | 11 |
| 6  | 585.3  | 293.2 | 568.3  | 567.3  | N  | 1098.7 | 549.8 | 1081.6 | 1080.6 | 10 |
| 7  | 698.4  | 349.7 | 681.4  | 680.4  | I  | 984.6  | 492.8 | 967.6  | 966.6  | 9  |
| 8  | 769.4  | 385.2 | 752.4  | 751.4  | A  | 871.5  | 436.3 | 854.5  | 853.5  | 8  |
| 9  | 897.5  | 449.2 | 880.5  | 879.5  | Q  | 800.5  | 400.8 | 783.5  | 782.5  | 7  |
| 10 | 996.6  | 498.8 | 979.5  | 978.5  | V  | 672.4  | 336.7 | 655.4  | 654.4  | 6  |
| 11 | 1109.6 | 555.3 | 1092.6 | 1091.6 | L  | 573.4  |       | 556.3  | 555.4  | 5  |
| 12 | 1180.7 | 590.8 | 1163.6 | 1162.7 | A  | 460.3  |       | 443.3  | 442.3  | 4  |
| 13 | 1309.7 | 655.4 | 1292.7 | 1291.7 | E  | 389.2  |       | 372.2  | 371.2  | 3  |
| 14 | 1422.8 | 711.9 | 1405.8 | 1404.8 | L  | 260.2  |       | 243.2  |        | 2  |
| 15 | 1568.9 | 785.0 | 1551.9 | 1550.9 | K  | 147.1  |       | 130.1  |        | 1  |

Gene symbol: Apcs

Protein name: Serum amyloid P-component precursor

Protein accession numbers: IPI00309214

Peptide sequence: (K)APPSIVLGQEQDNYGGGFQR(S)

Exclusive (unique to this protein): TRUE

SEQUEST XCorr score: 2.11 SEQUEST DCn score: 0.636

Fix modifications: None

Variable modifications: None

charge: 2

Observed m/z: 1067.02

Actual minus calculated peptide mass (AMU): -0.00415

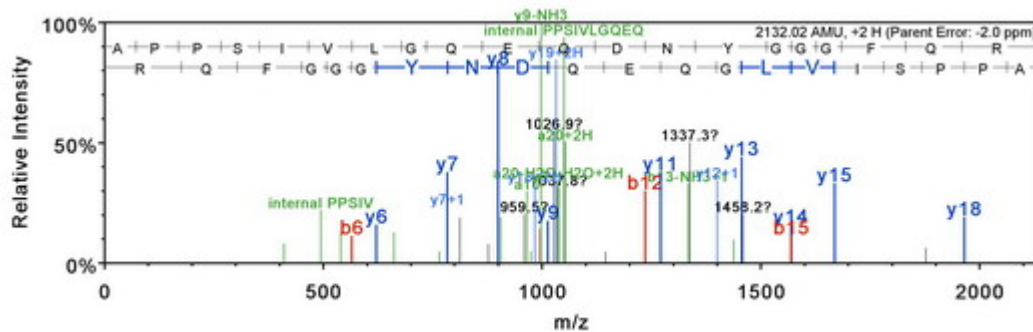

| B  | B Ions | B+2H   | B-NH3  | B-H2O  | AA | Y Ions | Y+2H   | Y-NH3  | Y-H2O  | Y  |
|----|--------|--------|--------|--------|----|--------|--------|--------|--------|----|
| 1  | 72.0   |        |        |        | A  | 2133.0 | 1067.0 | 2116.0 | 2115.0 | 20 |
| 2  | 169.1  |        |        |        | P  | 2062.0 | 1031.5 | 2045.0 | 2044.0 | 19 |
| 3  | 266.1  |        |        |        | P  | 1965.0 | 983.0  | 1947.9 | 1946.9 | 18 |
| 4  | 353.2  |        |        | 335.2  | S  | 1867.9 | 934.5  | 1850.9 | 1849.9 | 17 |
| 5  | 466.3  |        |        | 448.3  | I  | 1780.9 | 890.9  | 1763.8 | 1762.9 | 16 |
| 6  | 565.3  | 283.2  |        | 547.3  | V  | 1667.8 | 834.4  | 1650.8 | 1649.8 | 15 |
| 7  | 678.4  | 339.7  |        | 660.4  | L  | 1568.7 | 784.9  | 1551.7 | 1550.7 | 14 |
| 8  | 735.4  | 368.2  |        | 717.4  | G  | 1455.6 | 728.3  | 1438.6 | 1437.6 | 13 |
| 9  | 863.5  | 432.3  | 846.5  | 845.5  | Q  | 1398.6 | 699.8  | 1381.6 | 1380.6 | 12 |
| 10 | 992.5  | 496.8  | 975.5  | 974.5  | E  | 1270.5 | 635.8  | 1253.5 | 1252.5 | 11 |
| 11 | 1120.6 | 560.8  | 1103.6 | 1102.6 | Q  | 1141.5 | 571.3  | 1124.5 | 1123.5 | 10 |
| 12 | 1235.6 | 618.3  | 1218.6 | 1217.6 | D  | 1013.4 | 507.2  | 996.4  | 995.4  | 9  |
| 13 | 1349.7 | 675.3  | 1332.6 | 1331.7 | N  | 898.4  | 449.7  | 881.4  |        | 8  |
| 14 | 1512.7 | 756.9  | 1495.7 | 1494.7 | Y  | 784.4  | 392.7  | 767.4  |        | 7  |
| 15 | 1569.8 | 785.4  | 1552.7 | 1551.7 | G  | 621.3  | 311.2  | 604.3  |        | 6  |
| 16 | 1626.8 | 813.9  | 1609.8 | 1608.8 | G  | 564.3  |        | 547.3  |        | 5  |
| 17 | 1683.8 | 842.4  | 1666.8 | 1665.8 | G  | 507.3  |        | 490.2  |        | 4  |
| 18 | 1830.9 | 915.9  | 1813.8 | 1812.9 | F  | 450.3  |        | 433.2  |        | 3  |
| 19 | 1958.9 | 980.0  | 1941.9 | 1940.9 | Q  | 303.2  |        | 286.2  |        | 2  |
| 20 | 2133.0 | 1067.0 | 2116.0 | 2115.0 | R  | 175.1  |        | 158.1  |        | 1  |

Gene symbol: Apeh

Protein name: Isoform 2 of Acylamino-acid-releasing enzyme

Protein accession numbers: IPI00279218,IPI00387245

Peptide sequence: (R)QVLLSEPQEAAALYR(G)

Exclusive (unique to this protein): TRUE

SEQUEST XCorr score: 2.61 SEQUEST DCn score: 0.603

Fix modifications: None

Variable modifications: None

charge: 2

Observed m/z: 844.4522

Actual minus calculated peptide mass (AMU): -0.005493

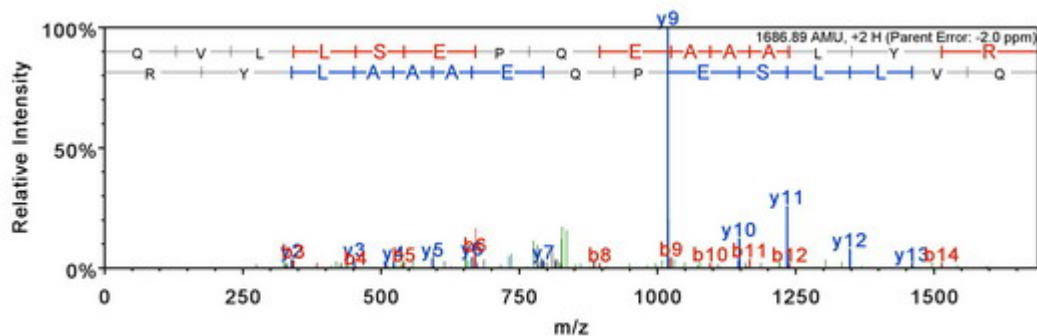

| B  | B Ions | B+2H  | B-NH3  | B-H2O  | AA | Y Ions | Y+2H  | Y-NH3  | Y-H2O  | Y  |
|----|--------|-------|--------|--------|----|--------|-------|--------|--------|----|
| 1  | 129.1  |       | 112.0  |        | Q  | 1687.9 | 844.5 | 1670.9 | 1669.9 | 15 |
| 2  | 228.1  |       | 211.1  |        | V  | 1559.8 | 780.4 | 1542.8 | 1541.8 | 14 |
| 3  | 341.2  |       | 324.2  |        | L  | 1460.8 | 730.9 | 1443.8 | 1442.8 | 13 |
| 4  | 454.3  |       | 437.3  |        | L  | 1347.7 | 674.4 | 1330.7 | 1329.7 | 12 |
| 5  | 541.3  |       | 524.3  | 523.3  | S  | 1234.6 | 617.8 | 1217.6 | 1216.6 | 11 |
| 6  | 670.4  | 335.7 | 653.4  | 652.4  | E  | 1147.6 | 574.3 | 1130.5 | 1129.6 | 10 |
| 7  | 767.4  | 384.2 | 750.4  | 749.4  | P  | 1018.5 | 509.8 | 1001.5 | 1000.5 | 9  |
| 8  | 895.5  | 448.3 | 878.5  | 877.5  | Q  | 921.5  | 461.2 | 904.5  | 903.5  | 8  |
| 9  | 1024.5 | 512.8 | 1007.5 | 1006.5 | E  | 793.4  | 397.2 | 776.4  | 775.4  | 7  |
| 10 | 1095.6 | 548.3 | 1078.5 | 1077.6 | A  | 664.4  | 332.7 | 647.4  |        | 6  |
| 11 | 1166.6 | 583.8 | 1149.6 | 1148.6 | A  | 593.3  |       | 576.3  |        | 5  |
| 12 | 1237.6 | 619.3 | 1220.6 | 1219.6 | A  | 522.3  |       | 505.3  |        | 4  |
| 13 | 1350.7 | 675.9 | 1333.7 | 1332.7 | L  | 451.3  |       | 434.2  |        | 3  |
| 14 | 1513.8 | 757.4 | 1496.8 | 1495.8 | Y  | 338.2  |       | 321.2  |        | 2  |
| 15 | 1687.9 | 844.5 | 1670.9 | 1669.9 | R  | 175.1  |       | 158.1  |        | 1  |

Gene symbol: ApoA1bp

Protein name: Apolipoprotein A-I-binding protein precursor

Protein accession numbers: IPI00170307

Peptide sequence: (K)YQLNLPSYPDTECVYR(L)

Exclusive (unique to this protein): TRUE

SEQUEST XCorr score: 2.02 SEQUEST DCn score: 0.427

Fix modifications: C13: Carbamidomethyl (+57.02) Variable modifications: None

charge: 2

Observed m/z: 1009.4675

Actual minus calculated peptide mass (AMU): -0.005737

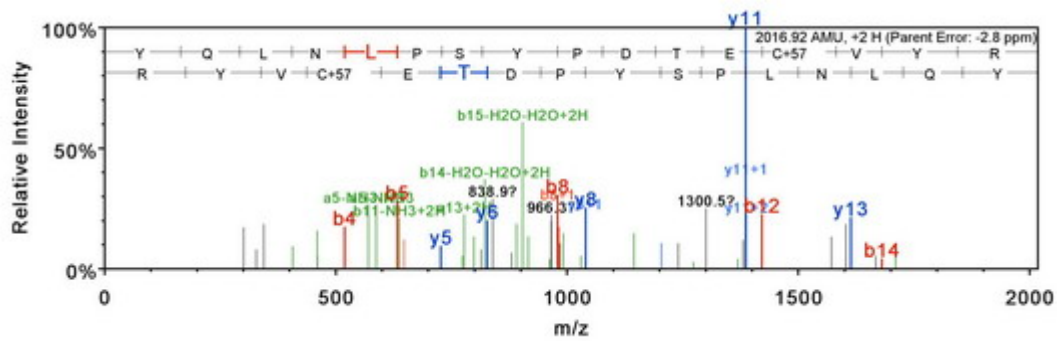

| B  | B Ions | B+2H   | B-NH3  | B-H2O  | AA   | Y Ions | Y+2H   | Y-NH3  | Y-H2O  | Y  |
|----|--------|--------|--------|--------|------|--------|--------|--------|--------|----|
| 1  | 164.1  |        |        |        | Y    | 2017.9 | 1009.5 | 2000.9 | 1999.9 | 16 |
| 2  | 292.1  |        | 275.1  |        | Q    | 1854.9 | 927.9  | 1837.8 | 1836.9 | 15 |
| 3  | 405.2  |        | 388.2  |        | L    | 1726.8 | 863.9  | 1709.8 | 1708.8 | 14 |
| 4  | 519.3  |        | 502.2  |        | N    | 1613.7 | 807.4  | 1596.7 | 1595.7 | 13 |
| 5  | 632.3  |        | 615.3  |        | L    | 1499.7 | 750.4  | 1482.7 | 1481.7 | 12 |
| 6  | 729.4  | 365.2  | 712.4  |        | P    | 1386.6 | 693.8  | 1369.6 | 1368.6 | 11 |
| 7  | 816.4  | 408.7  | 799.4  | 798.4  | S    | 1289.5 | 645.3  | 1272.5 | 1271.5 | 10 |
| 8  | 979.5  | 490.3  | 962.5  | 961.5  | Y    | 1202.5 | 601.8  | 1185.5 | 1184.5 | 9  |
| 9  | 1076.5 | 538.8  | 1059.5 | 1058.5 | P    | 1039.5 | 520.2  | 1022.4 | 1021.4 | 8  |
| 10 | 1191.6 | 596.3  | 1174.5 | 1173.6 | D    | 942.4  | 471.7  | 925.4  | 924.4  | 7  |
| 11 | 1292.6 | 646.8  | 1275.6 | 1274.6 | T    | 827.4  | 414.2  | 810.4  | 809.4  | 6  |
| 12 | 1421.7 | 711.3  | 1404.6 | 1403.7 | E    | 726.3  |        | 709.3  | 708.3  | 5  |
| 13 | 1581.7 | 791.4  | 1564.7 | 1563.7 | C+57 | 597.3  |        | 580.3  |        | 4  |
| 14 | 1680.8 | 840.9  | 1663.7 | 1662.8 | V    | 437.3  |        | 420.2  |        | 3  |
| 15 | 1843.8 | 922.4  | 1826.8 | 1825.8 | Y    | 338.2  |        | 321.2  |        | 2  |
| 16 | 2017.9 | 1009.5 | 2000.9 | 1999.9 | R    | 175.1  |        | 158.1  |        | 1  |

Gene symbol: Arf5

Protein name: ADP-ribosylation factor 5

Protein accession numbers: IPI00221615

Peptide sequence: (K)NICFTVWDVGGQDK(I)

Exclusive (unique to this protein): TRUE

SEQUEST XCorr score: 2.02 SEQUEST DCn score: 0.625

Fix modifications: C3: Carbamidomethyl (+57.02) Variable modifications: None

charge: 2

Observed m/z: 819.884

Actual minus calculated peptide mass (AMU): 0.001343

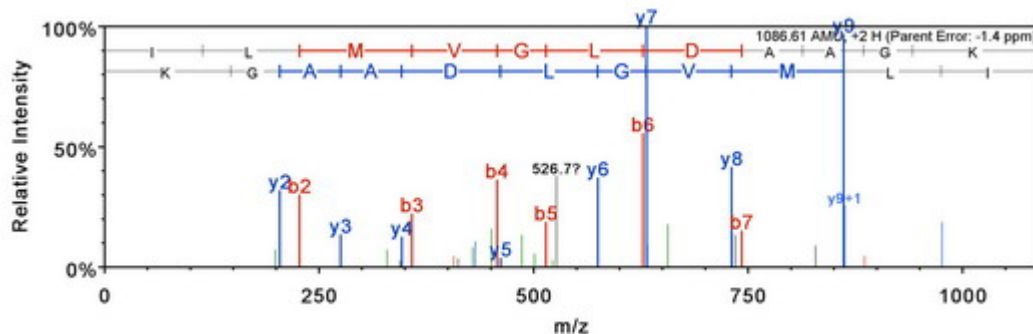

| B  | B Ions | B+2H  | B-NH3  | B-H2O  | AA | Y Ions | Y+2H  | Y-NH3  | Y-H2O  | Y  |
|----|--------|-------|--------|--------|----|--------|-------|--------|--------|----|
| 1  | 114.1  |       |        |        | I  | 1087.6 | 544.3 | 1070.6 | 1069.6 | 11 |
| 2  | 227.2  |       |        |        | L  | 974.5  | 487.8 | 957.5  | 956.5  | 10 |
| 3  | 358.2  |       |        |        | M  | 861.5  | 431.2 | 844.4  | 843.4  | 9  |
| 4  | 457.3  |       |        |        | V  | 730.4  | 365.7 | 713.4  | 712.4  | 8  |
| 5  | 514.3  |       |        |        | G  | 631.3  | 316.2 | 614.3  | 613.3  | 7  |
| 6  | 627.4  | 314.2 |        |        | L  | 574.3  | 287.7 | 557.3  | 556.3  | 6  |
| 7  | 742.4  | 371.7 |        | 724.4  | D  | 461.2  |       | 444.2  | 443.2  | 5  |
| 8  | 813.5  | 407.2 |        | 795.4  | A  | 346.2  |       | 329.2  |        | 4  |
| 9  | 884.5  | 442.8 |        | 866.5  | A  | 275.2  |       | 258.1  |        | 3  |
| 10 | 941.5  | 471.3 |        | 923.5  | G  | 204.1  |       | 187.1  |        | 2  |
| 11 | 1087.6 | 544.3 | 1070.6 | 1069.6 | K  | 147.1  |       | 130.1  |        | 1  |

Gene symbol: Arl1

Protein name: Arl1 protein

Protein accession numbers: IPI00608124

Peptide sequence: (R)ILILGLDGAGK(T)

Exclusive (unique to this protein): TRUE

SEQUEST XCorr score: 2.12 SEQUEST DCn score: 0.477

Fix modifications: None

Variable modifications: None

charge: 2

Observed m/z: 535.3309

Actual minus calculated peptide mass (AMU): -0.0085453

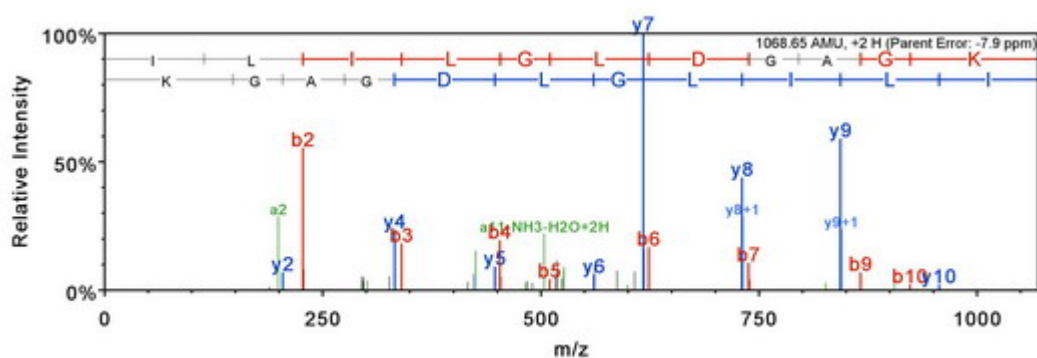

| B  | B ions | B+2H  | B-NH3  | B-H2O  | AA | Y ions | Y+2H  | Y-NH3  | Y-H2O  | Y  |
|----|--------|-------|--------|--------|----|--------|-------|--------|--------|----|
| 1  | 114.1  |       |        |        | I  | 1069.7 | 535.3 | 1052.6 | 1051.7 | 11 |
| 2  | 227.2  |       |        |        | L  | 956.6  | 478.8 | 939.6  | 938.6  | 10 |
| 3  | 340.3  |       |        |        | I  | 843.5  | 422.3 | 826.5  | 825.5  | 9  |
| 4  | 453.3  |       |        |        | L  | 730.4  | 365.7 | 713.4  | 712.4  | 8  |
| 5  | 510.4  |       |        |        | G  | 617.3  | 309.2 | 600.3  | 599.3  | 7  |
| 6  | 623.5  | 312.2 |        |        | L  | 560.3  | 280.7 | 543.3  | 542.3  | 6  |
| 7  | 738.5  | 369.7 |        | 720.5  | D  | 447.2  |       | 430.2  | 429.2  | 5  |
| 8  | 795.5  | 398.3 |        | 777.5  | G  | 332.2  |       | 315.2  |        | 4  |
| 9  | 866.5  | 433.8 |        | 848.5  | A  | 275.2  |       | 258.1  |        | 3  |
| 10 | 923.6  | 462.3 |        | 905.6  | G  | 204.1  |       | 187.1  |        | 2  |
| 11 | 1069.7 | 535.3 | 1052.6 | 1051.7 | K  | 147.1  |       | 130.1  |        | 1  |

Gene symbol: Arl3

Protein name: ADP-ribosylation factor-like protein 3

Protein accession numbers: IPI00124787

Peptide sequence: (R)ILLLGLDNAGK(T)

Exclusive (unique to this protein): TRUE

SEQUEST XCorr score: 2.07 SEQUEST DCn score: 0.436

Fix modifications: None

Variable modifications: None

charge: 2

Observed m/z: 563.8414

Actual minus calculated peptide mass (AMU): -0.0089149

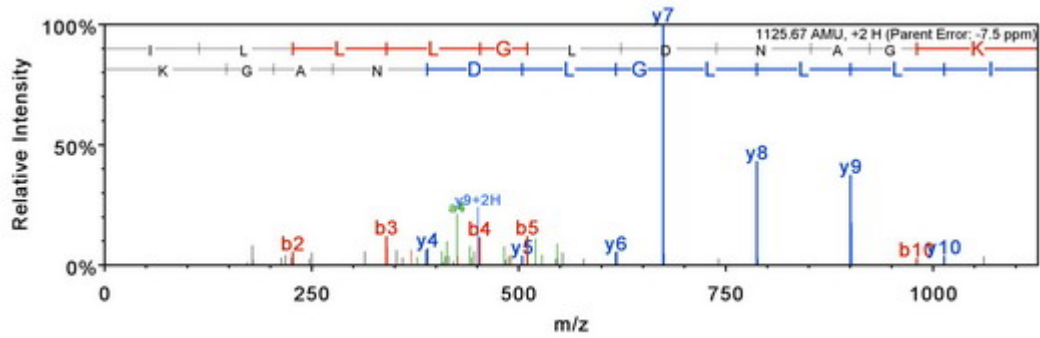

| B  | B ions | B+2H  | B-NH3  | B-H2O  | AA | Y ions | Y+2H  | Y-NH3  | Y-H2O  | Y  |
|----|--------|-------|--------|--------|----|--------|-------|--------|--------|----|
| 1  | 114.1  |       |        |        | I  | 1126.7 | 563.9 | 1109.7 | 1108.7 | 11 |
| 2  | 227.2  |       |        |        | L  | 1013.6 | 507.3 | 996.6  | 995.6  | 10 |
| 3  | 340.3  |       |        |        | L  | 900.5  | 450.8 | 883.5  | 882.5  | 9  |
| 4  | 453.3  |       |        |        | L  | 787.4  | 394.2 | 770.4  | 769.4  | 8  |
| 5  | 510.4  |       |        |        | G  | 674.4  | 337.7 | 657.3  | 656.3  | 7  |
| 6  | 623.5  | 312.2 |        |        | L  | 617.3  | 309.2 | 600.3  | 599.3  | 6  |
| 7  | 738.5  | 369.7 |        | 720.5  | D  | 504.2  |       | 487.2  | 486.2  | 5  |
| 8  | 852.5  | 426.8 | 835.5  | 834.5  | N  | 389.2  |       | 372.2  |        | 4  |
| 9  | 923.6  | 462.3 | 906.5  | 905.6  | A  | 275.2  |       | 258.1  |        | 3  |
| 10 | 980.6  | 490.8 | 963.6  | 962.6  | G  | 204.1  |       | 187.1  |        | 2  |
| 11 | 1126.7 | 563.9 | 1109.7 | 1108.7 | K  | 147.1  |       | 130.1  |        | 1  |

Gene symbol: Armet

Protein name: ARMET protein precursor

Protein accession numbers: IPI00110350,IPI00404019,IPI00775791

Peptide sequence: (R)LCYYIGATDDAATK(I)

Exclusive (unique to this protein): TRUE

SEQUEST XCorr score: 2.4 SEQUEST DCn score: 0.652

Fix modifications: C2: Carbamidomethyl (+57.02)Variable modifications: None

charge: 2

Observed m/z: 781.3652

Actual minus calculated peptide mass (AMU): 0.0015855

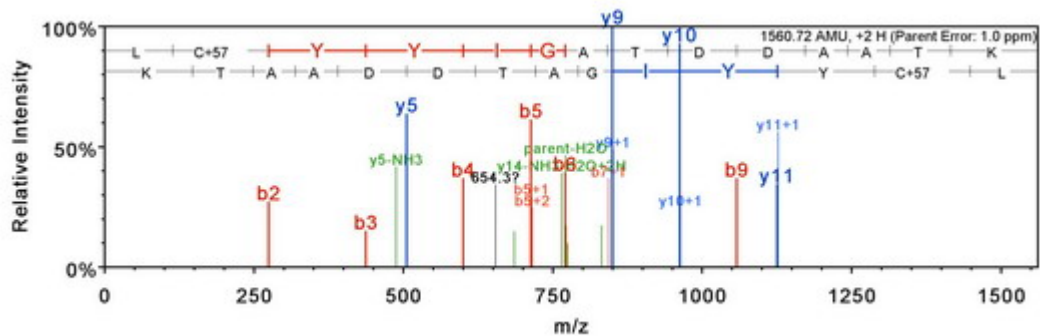

| B  | B Ions | B+2H  | B-NH3  | B-H2O  | AA   | Y Ions | Y+2H  | Y-NH3  | Y-H2O  | Y  |
|----|--------|-------|--------|--------|------|--------|-------|--------|--------|----|
| 1  | 114.1  |       |        |        | L    | 1561.7 | 781.4 | 1544.7 | 1543.7 | 14 |
| 2  | 274.1  |       |        |        | C+57 | 1448.6 | 724.8 | 1431.6 | 1430.6 | 13 |
| 3  | 437.2  |       |        |        | Y    | 1288.6 | 644.8 | 1271.6 | 1270.6 | 12 |
| 4  | 600.3  |       |        |        | Y    | 1125.5 | 563.3 | 1108.5 | 1107.5 | 11 |
| 5  | 713.3  |       |        |        | I    | 962.5  | 481.7 | 945.5  | 944.5  | 10 |
| 6  | 770.4  | 385.7 |        |        | G    | 849.4  | 425.2 | 832.4  | 831.4  | 9  |
| 7  | 841.4  | 421.2 |        |        | A    | 792.4  | 396.7 | 775.4  | 774.4  | 8  |
| 8  | 942.4  | 471.7 |        | 924.4  | T    | 721.3  | 361.2 | 704.3  | 703.3  | 7  |
| 9  | 1057.5 | 529.2 |        | 1039.5 | D    | 620.3  | 310.7 | 603.3  | 602.3  | 6  |
| 10 | 1172.5 | 586.8 |        | 1154.5 | D    | 505.3  |       | 488.2  | 487.3  | 5  |
| 11 | 1243.5 | 622.3 |        | 1225.5 | A    | 390.2  |       | 373.2  | 372.2  | 4  |
| 12 | 1314.6 | 657.8 |        | 1296.6 | A    | 319.2  |       | 302.2  | 301.2  | 3  |
| 13 | 1415.6 | 708.3 |        | 1397.6 | T    | 248.2  |       | 231.1  | 230.2  | 2  |
| 14 | 1561.7 | 781.4 | 1544.7 | 1543.7 | K    | 147.1  |       | 130.1  |        | 1  |

Gene symbol: Asna1

Protein name: Arsenical pump-driving ATPase

Protein accession numbers: IPI00624501

Peptide sequence: (R)ESVLIISTDPAHNISDAFDQK(F)

Exclusive (unique to this protein): TRUE

SEQUEST XCorr score: 2.35 SEQUEST DCn score: 0.636

Fix modifications: None

Variable modifications: None

charge: 2

Observed m/z: 1150.5696

Actual minus calculated peptide mass (AMU): -0.009766

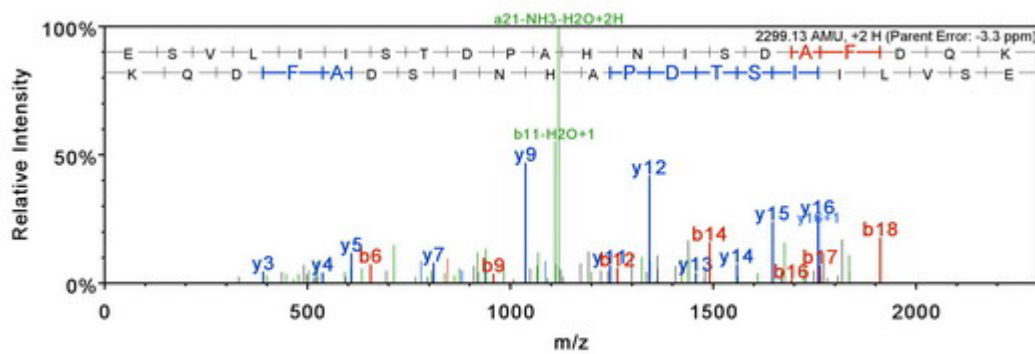

| B  | B Ions | B+2H   | B-NH3  | B-H2O  | AA | Y Ions | Y+2H   | Y-NH3  | Y-H2O  | Y  |
|----|--------|--------|--------|--------|----|--------|--------|--------|--------|----|
| 1  | 130.1  |        |        | 112.0  | E  | 2300.1 | 1150.6 | 2283.1 | 2282.1 | 21 |
| 2  | 217.1  |        |        | 199.1  | S  | 2171.1 | 1086.0 | 2154.1 | 2153.1 | 20 |
| 3  | 316.2  |        |        | 298.1  | V  | 2084.1 | 1042.5 | 2067.0 | 2066.1 | 19 |
| 4  | 429.2  |        |        | 411.2  | L  | 1985.0 | 993.0  | 1968.0 | 1967.0 | 18 |
| 5  | 542.3  |        |        | 524.3  | I  | 1871.9 | 936.5  | 1854.9 | 1853.9 | 17 |
| 6  | 655.4  | 328.2  |        | 637.4  | I  | 1758.8 | 879.9  | 1741.8 | 1740.8 | 16 |
| 7  | 742.4  | 371.7  |        | 724.4  | S  | 1645.8 | 823.4  | 1628.7 | 1627.7 | 15 |
| 8  | 843.5  | 422.3  |        | 825.5  | T  | 1558.7 | 779.9  | 1541.7 | 1540.7 | 14 |
| 9  | 958.5  | 479.8  |        | 940.5  | D  | 1457.7 | 729.3  | 1440.6 | 1439.7 | 13 |
| 10 | 1055.6 | 528.3  |        | 1037.5 | P  | 1342.6 | 671.8  | 1325.6 | 1324.6 | 12 |
| 11 | 1126.6 | 563.8  |        | 1108.6 | A  | 1245.6 | 623.3  | 1228.6 | 1227.6 | 11 |
| 12 | 1263.7 | 632.3  |        | 1245.7 | H  | 1174.5 | 587.8  | 1157.5 | 1156.5 | 10 |
| 13 | 1377.7 | 689.4  | 1360.7 | 1359.7 | N  | 1037.5 | 519.3  | 1020.5 | 1019.5 | 9  |
| 14 | 1490.8 | 745.9  | 1473.8 | 1472.8 | I  | 923.5  | 462.2  | 906.4  | 905.4  | 8  |
| 15 | 1577.8 | 789.4  | 1560.8 | 1559.8 | S  | 810.4  | 405.7  | 793.3  | 792.4  | 7  |
| 16 | 1692.8 | 846.9  | 1675.8 | 1674.8 | D  | 723.3  | 362.2  | 706.3  | 705.3  | 6  |
| 17 | 1763.9 | 882.4  | 1746.9 | 1745.9 | A  | 608.3  |        | 591.3  | 590.3  | 5  |
| 18 | 1911.0 | 956.0  | 1893.9 | 1892.9 | F  | 537.3  |        | 520.2  | 519.3  | 4  |
| 19 | 2026.0 | 1013.5 | 2009.0 | 2008.0 | D  | 390.2  |        | 373.2  | 372.2  | 3  |
| 20 | 2154.0 | 1077.5 | 2137.0 | 2136.0 | Q  | 275.2  |        | 258.1  |        | 2  |
| 21 | 2300.1 | 1150.6 | 2283.1 | 2282.1 | K  | 147.1  |        | 130.1  |        | 1  |

Gene symbol: Atg5

Protein name: Autophagy protein 5

Protein accession numbers: IPI00114936

Peptide sequence: (R)IPTCFITYLQDEITER(E)

Exclusive (unique to this protein): TRUE

SEQUEST XCorr score: 2.5 SEQUEST DCn score: 0.648

Fix modifications: C4: Carbamidomethyl (+57.02) Variable modifications: None

charge: 2

Observed m/z: 943.4519

Actual minus calculated peptide mass (AMU): -0.004883

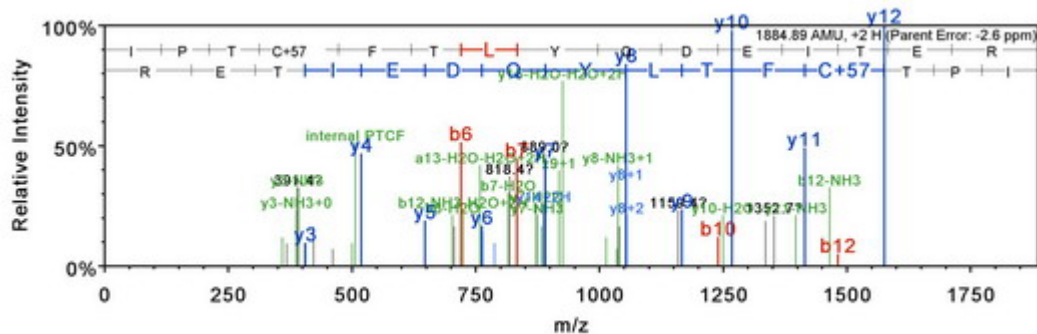



| B  | B Ions | B+2H  | B-NH3  | B-H2O  | AA   | Y Ions | Y+2H  | Y-NH3  | Y-H2O  | Y  |
|----|--------|-------|--------|--------|------|--------|-------|--------|--------|----|
| 1  | 114.1  |       |        |        | I    | 1885.9 | 943.5 | 1868.9 | 1867.9 | 15 |
| 2  | 211.1  |       |        |        | P    | 1772.8 | 886.9 | 1755.8 | 1754.8 | 14 |
| 3  | 312.2  |       |        | 294.2  | T    | 1675.8 | 838.4 | 1658.7 | 1657.8 | 13 |
| 4  | 472.2  |       |        | 454.2  | C+57 | 1574.7 | 787.9 | 1557.7 | 1556.7 | 12 |
| 5  | 619.3  |       |        | 601.3  | F    | 1414.7 | 707.9 | 1397.7 | 1396.7 | 11 |
| 6  | 720.3  | 360.7 |        | 702.3  | T    | 1267.6 | 634.3 | 1250.6 | 1249.6 | 10 |
| 7  | 833.4  | 417.2 |        | 815.4  | L    | 1166.6 | 583.8 | 1149.5 | 1148.6 | 9  |
| 8  | 996.5  | 498.8 |        | 978.5  | Y    | 1053.5 | 527.3 | 1036.5 | 1035.5 | 8  |
| 9  | 1124.5 | 562.8 | 1107.5 | 1106.5 | Q    | 890.4  | 445.7 | 873.4  | 872.4  | 7  |
| 10 | 1239.6 | 620.3 | 1222.5 | 1221.6 | D    | 762.4  | 381.7 | 745.3  | 744.4  | 6  |
| 11 | 1368.6 | 684.8 | 1351.6 | 1350.6 | E    | 647.3  |       | 630.3  | 629.3  | 5  |
| 12 | 1481.7 | 741.4 | 1464.7 | 1463.7 | I    | 518.3  |       | 501.3  | 500.3  | 4  |
| 13 | 1582.8 | 791.9 | 1565.7 | 1564.7 | T    | 405.2  |       | 388.2  | 387.2  | 3  |
| 14 | 1711.8 | 856.4 | 1694.8 | 1693.8 | E    | 304.2  |       | 287.1  | 286.2  | 2  |
| 15 | 1885.9 | 943.5 | 1868.9 | 1867.9 | R    | 175.1  |       | 158.1  |        | 1  |

Gene symbol: Atp1a1

Protein name: Sodium/potassium-transporting ATPase subunit alpha-1 precursor

Protein accession numbers: IPI00311682

Peptide sequence: (K)GVGIISGNETVEDIAAR(L)

Exclusive (unique to this protein): TRUE

SEQUEST XCorr score: 2.65 SEQUEST DCn score: 0.64

Fix modifications: None

Variable modifications: None

charge: 2

Observed m/z: 915.4631

Actual minus calculated peptide mass (AMU): -0.006226

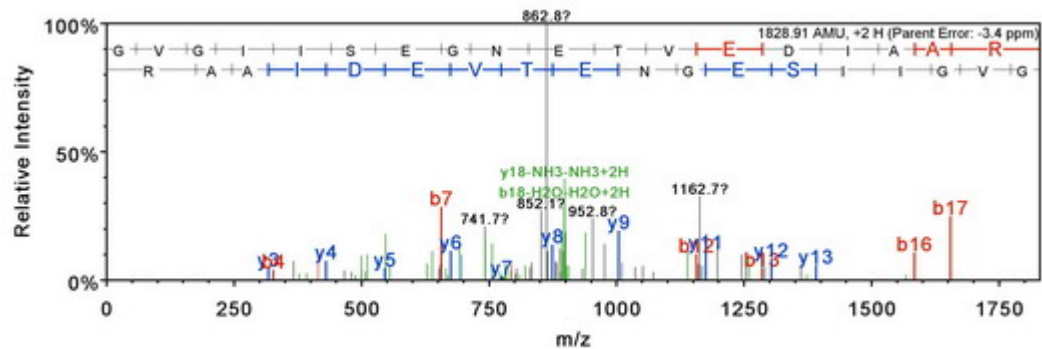

| B  | B Ions | B+2H  | B-NH3  | B-H2O  | AA | Y Ions | Y+2H  | Y-NH3  | Y-H2O  | Y  |
|----|--------|-------|--------|--------|----|--------|-------|--------|--------|----|
| 1  | 58.0   |       |        |        | G  | 1829.9 | 915.5 | 1812.9 | 1811.9 | 18 |
| 2  | 157.1  |       |        |        | V  | 1772.9 | 887.0 | 1755.9 | 1754.9 | 17 |
| 3  | 214.1  |       |        |        | G  | 1673.8 | 837.4 | 1656.8 | 1655.8 | 16 |
| 4  | 327.2  |       |        |        | I  | 1616.8 | 808.9 | 1599.8 | 1598.8 | 15 |
| 5  | 440.3  |       |        |        | I  | 1503.7 | 752.4 | 1486.7 | 1485.7 | 14 |
| 6  | 527.3  | 264.2 |        | 509.3  | S  | 1390.7 | 695.8 | 1373.6 | 1372.6 | 13 |
| 7  | 656.4  | 328.7 |        | 638.4  | E  | 1303.6 | 652.3 | 1286.6 | 1285.6 | 12 |
| 8  | 713.4  | 357.2 |        | 695.4  | G  | 1174.6 | 587.8 | 1157.5 | 1156.6 | 11 |
| 9  | 827.4  | 414.2 | 810.4  | 809.4  | N  | 1117.5 | 559.3 | 1100.5 | 1099.5 | 10 |
| 10 | 956.5  | 478.7 | 939.4  | 938.5  | E  | 1003.5 | 502.3 | 986.5  | 985.5  | 9  |
| 11 | 1057.5 | 529.3 | 1040.5 | 1039.5 | T  | 874.5  | 437.7 | 857.4  | 856.5  | 8  |
| 12 | 1156.6 | 578.8 | 1139.6 | 1138.6 | V  | 773.4  | 387.2 | 756.4  | 755.4  | 7  |
| 13 | 1285.6 | 643.3 | 1268.6 | 1267.6 | E  | 674.4  | 337.7 | 657.3  | 656.3  | 6  |
| 14 | 1400.7 | 700.8 | 1383.6 | 1382.6 | D  | 545.3  |       | 528.3  | 527.3  | 5  |
| 15 | 1513.7 | 757.4 | 1496.7 | 1495.7 | I  | 430.3  |       | 413.3  |        | 4  |
| 16 | 1584.8 | 792.9 | 1567.8 | 1566.8 | A  | 317.2  |       | 300.2  |        | 3  |
| 17 | 1655.8 | 828.4 | 1638.8 | 1637.8 | A  | 246.2  |       | 229.1  |        | 2  |
| 18 | 1829.9 | 915.5 | 1812.9 | 1811.9 | R  | 175.1  |       | 158.1  |        | 1  |

Gene symbol: Atp5f1

Protein name: ATP synthase B chain, mitochondrial precursor

Protein accession numbers: IPI00341282,IPI00758392

Peptide sequence: (R)HYLFDVQR(N)

Exclusive (unique to this protein): TRUE

SEQUEST XCorr score: 2.38 SEQUEST DCn score: 0.596

Fix modifications: None

Variable modifications: None

charge: 2

Observed m/z: 539.2771

Actual minus calculated peptide mass (AMU): -0.001831

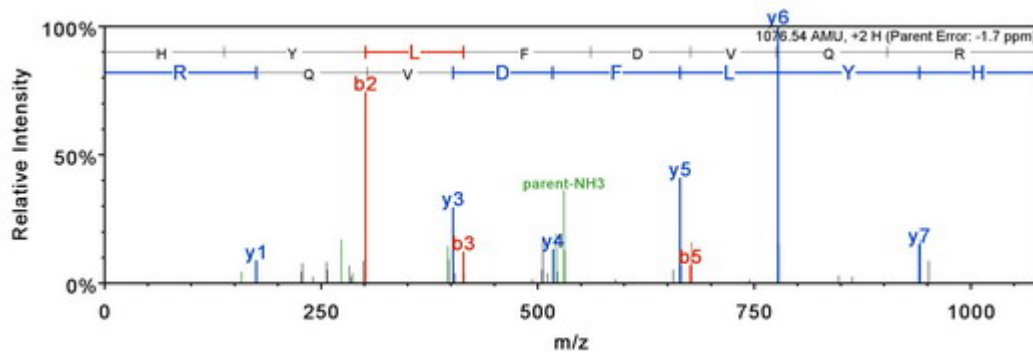

| B | B Ions | B+2H  | B-NH3  | B-H2O  | AA | Y Ions | Y+2H  | Y-NH3  | Y-H2O  | Y |
|---|--------|-------|--------|--------|----|--------|-------|--------|--------|---|
| 1 | 138.1  | 69.5  |        |        | H  | 1077.5 | 539.3 | 1060.5 | 1059.5 | 8 |
| 2 | 301.1  | 151.1 |        |        | Y  | 940.5  | 470.8 | 923.5  | 922.5  | 7 |
| 3 | 414.2  | 207.6 |        |        | L  | 777.4  | 389.2 | 760.4  | 759.4  | 6 |
| 4 | 561.3  | 281.2 |        |        | F  | 664.3  |       | 647.3  | 646.3  | 5 |
| 5 | 676.3  | 338.7 |        | 658.3  | D  | 517.3  |       | 500.3  | 499.3  | 4 |
| 6 | 775.4  | 388.2 |        | 757.4  | V  | 402.3  |       | 385.2  |        | 3 |
| 7 | 903.4  | 452.2 | 886.4  | 885.4  | Q  | 303.2  |       | 286.2  |        | 2 |
| 8 | 1077.5 | 539.3 | 1060.5 | 1059.5 | R  | 175.1  |       | 158.1  |        | 1 |

Gene symbol: Atp6v1c1

Protein name: Vacuolar ATP synthase subunit C 1

Protein accession numbers: IPI00130186

Peptide sequence: (R)SSNVLSEdqdsylcNVTlFR(K)

Exclusive (unique to this protein): TRUE

SEQUEST XCorr score: 2.43 SEQUEST DCn score: 0.656

Fix modifications: C14: Carbamidomethyl (+57.02) Variable modifications: None

charge: 2

Observed m/z: 1174.044

Actual minus calculated peptide mass (AMU): -0.007324

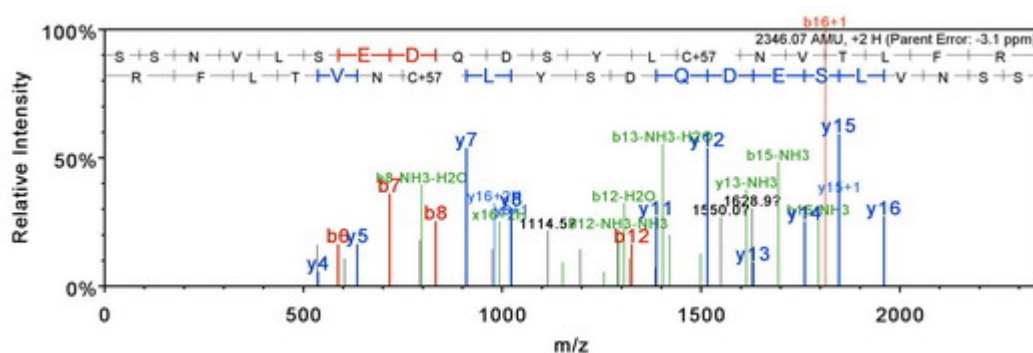

| B  | B ions | B+2H   | B-NH3  | B-H2O  | AA   | Y ions | Y+2H   | Y-NH3  | Y-H2O  | Y  |
|----|--------|--------|--------|--------|------|--------|--------|--------|--------|----|
| 1  | 88.0   |        |        | 70.0   | S    | 2347.1 | 1174.0 | 2330.1 | 2329.1 | 20 |
| 2  | 175.1  |        |        | 157.1  | S    | 2260.1 | 1130.5 | 2243.0 | 2242.1 | 19 |
| 3  | 289.1  |        | 272.1  | 271.1  | N    | 2173.0 | 1087.0 | 2156.0 | 2155.0 | 18 |
| 4  | 388.2  |        | 371.2  | 370.2  | V    | 2059.0 | 1030.0 | 2042.0 | 2041.0 | 17 |
| 5  | 501.3  |        | 484.2  | 483.3  | L    | 1959.9 | 980.5  | 1942.9 | 1941.9 | 16 |
| 6  | 588.3  | 294.7  | 571.3  | 570.3  | S    | 1846.8 | 923.9  | 1829.8 | 1828.8 | 15 |
| 7  | 717.3  | 359.2  | 700.3  | 699.3  | E    | 1759.8 | 880.4  | 1742.8 | 1741.8 | 14 |
| 8  | 832.4  | 416.7  | 815.3  | 814.4  | D    | 1630.8 | 815.9  | 1613.7 | 1612.7 | 13 |
| 9  | 960.4  | 480.7  | 943.4  | 942.4  | Q    | 1515.7 | 758.4  | 1498.7 | 1497.7 | 12 |
| 10 | 1075.5 | 538.2  | 1058.4 | 1057.4 | D    | 1387.7 | 694.3  | 1370.6 | 1369.7 | 11 |
| 11 | 1162.5 | 581.8  | 1145.5 | 1144.5 | S    | 1272.6 | 636.8  | 1255.6 | 1254.6 | 10 |
| 12 | 1325.5 | 663.3  | 1308.5 | 1307.5 | Y    | 1185.6 | 593.3  | 1168.6 | 1167.6 | 9  |
| 13 | 1438.6 | 719.8  | 1421.6 | 1420.6 | L    | 1022.6 | 511.8  | 1005.5 | 1004.5 | 8  |
| 14 | 1598.7 | 799.8  | 1581.6 | 1580.7 | C+57 | 909.5  | 455.2  | 892.4  | 891.5  | 7  |
| 15 | 1712.7 | 856.9  | 1695.7 | 1694.7 | N    | 749.4  | 375.2  | 732.4  | 731.4  | 6  |
| 16 | 1811.8 | 906.4  | 1794.8 | 1793.8 | V    | 635.4  |        | 618.4  | 617.4  | 5  |
| 17 | 1912.8 | 956.9  | 1895.8 | 1894.8 | T    | 536.3  |        | 519.3  | 518.3  | 4  |
| 18 | 2025.9 | 1013.5 | 2008.9 | 2007.9 | L    | 435.3  |        | 418.3  |        | 3  |
| 19 | 2173.0 | 1087.0 | 2155.9 | 2155.0 | F    | 322.2  |        | 305.2  |        | 2  |
| 20 | 2347.1 | 1174.0 | 2330.1 | 2329.1 | R    | 175.1  |        | 158.1  |        | 1  |

Gene symbol: Atp6v1d

Protein name: Vacuolar ATP synthase subunit D

Protein accession numbers: IPI00118787

Peptide sequence: (K)FTAGDFSTTVIQNVNK(A)

Exclusive (unique to this protein): TRUE

SEQUEST XCorr score: 2.36 SEQUEST DCn score: 0.201

Fix modifications: None

Variable modifications: None

charge: 2

Observed m/z: 871.445

Actual minus calculated peptide mass (AMU): 0.006104

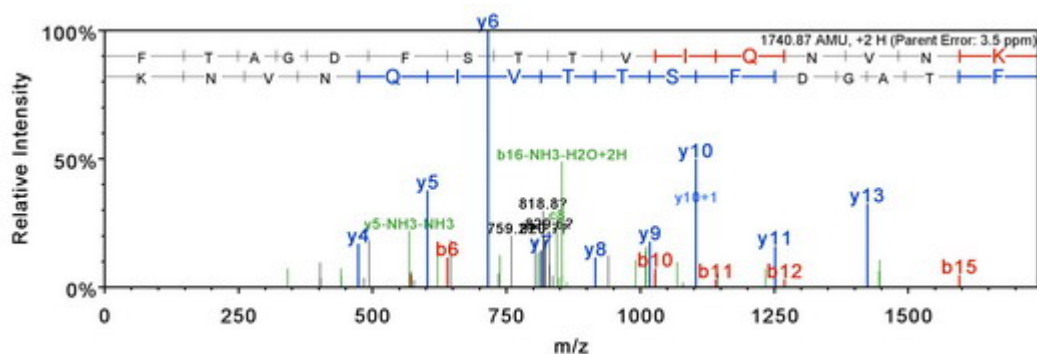

| B  | B Ions | B+2H  | B-NH3  | B-H2O  | A,A | Y Ions | Y+2H  | Y-NH3  | Y-H2O  | Y  |
|----|--------|-------|--------|--------|-----|--------|-------|--------|--------|----|
| 1  | 148.1  |       |        |        | F   | 1741.9 | 871.4 | 1724.9 | 1723.9 | 16 |
| 2  | 249.1  |       |        | 231.1  | T   | 1594.8 | 797.9 | 1577.8 | 1576.8 | 15 |
| 3  | 320.2  |       |        | 302.2  | A   | 1493.8 | 747.4 | 1476.7 | 1475.8 | 14 |
| 4  | 377.2  |       |        | 359.2  | G   | 1422.7 | 711.9 | 1405.7 | 1404.7 | 13 |
| 5  | 492.2  |       |        | 474.2  | D   | 1365.7 | 683.4 | 1348.7 | 1347.7 | 12 |
| 6  | 639.3  | 320.1 |        | 621.3  | F   | 1250.7 | 625.8 | 1233.7 | 1232.7 | 11 |
| 7  | 726.3  | 363.7 |        | 708.3  | S   | 1103.6 | 552.3 | 1086.6 | 1085.6 | 10 |
| 8  | 827.4  | 414.2 |        | 809.4  | T   | 1016.6 | 508.8 | 999.6  | 998.6  | 9  |
| 9  | 928.4  | 464.7 |        | 910.4  | T   | 915.5  | 458.3 | 898.5  | 897.5  | 8  |
| 10 | 1027.5 | 514.2 |        | 1009.5 | V   | 814.5  | 407.7 | 797.5  |        | 7  |
| 11 | 1140.6 | 570.8 |        | 1122.5 | I   | 715.4  | 358.2 | 698.4  |        | 6  |
| 12 | 1268.6 | 634.8 | 1251.6 | 1250.6 | Q   | 602.3  |       | 585.3  |        | 5  |
| 13 | 1382.7 | 691.8 | 1365.6 | 1364.7 | N   | 474.3  |       | 457.2  |        | 4  |
| 14 | 1481.7 | 741.4 | 1464.7 | 1463.7 | V   | 360.2  |       | 343.2  |        | 3  |
| 15 | 1595.8 | 798.4 | 1578.7 | 1577.8 | N   | 261.2  |       | 244.1  |        | 2  |
| 16 | 1741.9 | 871.4 | 1724.9 | 1723.9 | K   | 147.1  |       | 130.1  |        | 1  |

Gene symbol: Atp6v1e1

Protein name: Vacuolar ATP synthase subunit E 1

Protein accession numbers: IPI00119115

Peptide sequence: (R)ARDDLITDLLNEAK(Q)

Exclusive (unique to this protein): TRUE

SEQUEST XCorr score: 2.12 SEQUEST DCn score: 0.586

Fix modifications: None

Variable modifications: None

charge: 2

Observed m/z: 793.9243

Actual minus calculated peptide mass (AMU): 0.0015855

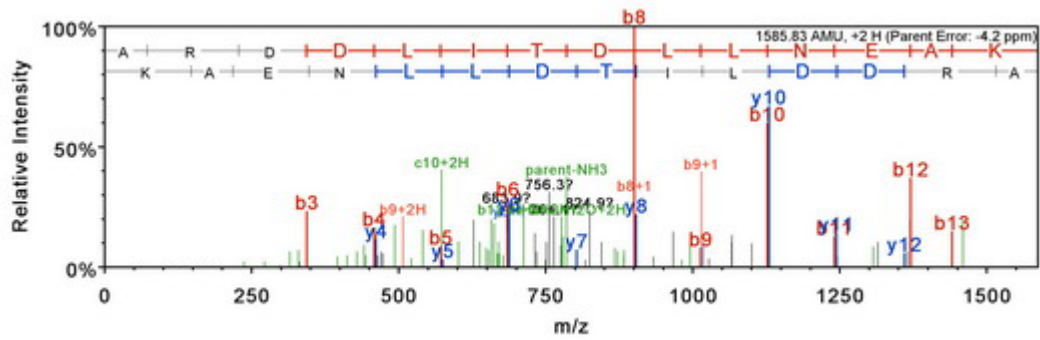

| B  | B ions | B+2H  | B-NH3  | B-H2O  | AA | Y ions | Y+2H  | Y-NH3  | Y-H2O  | Y  |
|----|--------|-------|--------|--------|----|--------|-------|--------|--------|----|
| 1  | 72.0   |       |        |        | A  | 1586.8 | 793.9 | 1569.8 | 1568.8 | 14 |
| 2  | 228.2  | 114.6 | 211.1  |        | R  | 1515.8 | 758.4 | 1498.8 | 1497.8 | 13 |
| 3  | 343.2  | 172.1 | 326.2  | 325.2  | D  | 1359.7 | 680.4 | 1342.7 | 1341.7 | 12 |
| 4  | 458.2  | 229.6 | 441.2  | 440.2  | D  | 1244.7 | 622.8 | 1227.7 | 1226.7 | 11 |
| 5  | 571.3  | 286.2 | 554.3  | 553.3  | L  | 1129.7 | 565.3 | 1112.6 | 1111.6 | 10 |
| 6  | 684.4  | 342.7 | 667.3  | 666.4  | I  | 1016.6 | 508.8 | 999.5  | 998.6  | 9  |
| 7  | 785.4  | 393.2 | 768.4  | 767.4  | T  | 903.5  | 452.2 | 886.5  | 885.5  | 8  |
| 8  | 900.4  | 450.7 | 883.4  | 882.4  | D  | 802.4  | 401.7 | 785.4  | 784.4  | 7  |
| 9  | 1013.5 | 507.3 | 996.5  | 995.5  | L  | 687.4  | 344.2 | 670.4  | 669.4  | 6  |
| 10 | 1126.6 | 563.8 | 1109.6 | 1108.6 | L  | 574.3  |       | 557.3  | 556.3  | 5  |
| 11 | 1240.7 | 620.8 | 1223.6 | 1222.6 | N  | 461.2  |       | 444.2  | 443.2  | 4  |
| 12 | 1369.7 | 685.4 | 1352.7 | 1351.7 | E  | 347.2  |       | 330.2  | 329.2  | 3  |
| 13 | 1440.7 | 720.9 | 1423.7 | 1422.7 | A  | 218.2  |       | 201.1  |        | 2  |
| 14 | 1586.8 | 793.9 | 1569.8 | 1568.8 | K  | 147.1  |       | 130.1  |        | 1  |

Gene symbol: AU042651

Protein name: Expressed sequence AU042651

Protein accession numbers: IPI00226116

Peptide sequence: (R)LQAGVGYANTFNCIR(M)

Exclusive (unique to this protein): TRUE

SEQUEST XCorr score: 2.11 SEQUEST DCn score: 0.496

Fix modifications: C13: Carbamidomethyl (+57.02) Variable modifications: None

charge: 2

Observed m/z: 842.4202

Actual minus calculated peptide mass (AMU): 0.004883

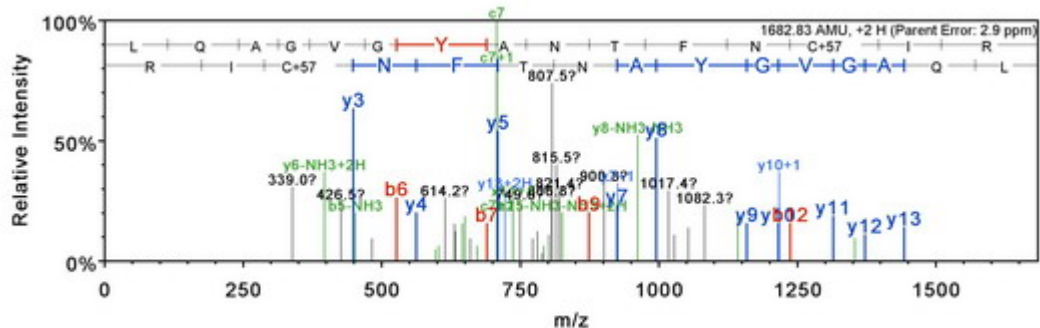

| B  | B Ions | B+2H  | B-NH3  | B-H2O  | AA   | Y Ions | Y+2H  | Y-NH3  | Y-H2O  | Y  |
|----|--------|-------|--------|--------|------|--------|-------|--------|--------|----|
| 1  | 114.1  |       |        |        | L    | 1683.8 | 842.4 | 1666.8 | 1665.8 | 15 |
| 2  | 242.2  |       | 225.1  |        | Q    | 1570.7 | 785.9 | 1553.7 | 1552.7 | 14 |
| 3  | 313.2  |       | 296.2  |        | A    | 1442.7 | 721.9 | 1425.7 | 1424.7 | 13 |
| 4  | 370.2  |       | 353.2  |        | G    | 1371.7 | 686.3 | 1354.6 | 1353.6 | 12 |
| 5  | 469.3  |       | 452.3  |        | V    | 1314.6 | 657.8 | 1297.6 | 1296.6 | 11 |
| 6  | 526.3  | 263.6 | 509.3  |        | G    | 1215.6 | 608.3 | 1198.5 | 1197.5 | 10 |
| 7  | 689.4  | 345.2 | 672.3  |        | Y    | 1158.5 | 579.8 | 1141.5 | 1140.5 | 9  |
| 8  | 760.4  | 380.7 | 743.4  |        | A    | 995.5  | 498.2 | 978.5  | 977.5  | 8  |
| 9  | 874.4  | 437.7 | 857.4  |        | N    | 924.4  | 462.7 | 907.4  | 906.4  | 7  |
| 10 | 975.5  | 488.3 | 958.5  | 957.5  | T    | 810.4  | 405.7 | 793.4  | 792.4  | 6  |
| 11 | 1122.6 | 561.8 | 1105.5 | 1104.5 | F    | 709.4  |       | 692.3  |        | 5  |
| 12 | 1236.6 | 618.8 | 1219.6 | 1218.6 | N    | 562.3  |       | 545.3  |        | 4  |
| 13 | 1396.6 | 698.8 | 1379.6 | 1378.6 | C+57 | 448.2  |       | 431.2  |        | 3  |
| 14 | 1509.7 | 755.4 | 1492.7 | 1491.7 | I    | 288.2  |       | 271.2  |        | 2  |
| 15 | 1683.8 | 842.4 | 1666.8 | 1665.8 | R    | 175.1  |       | 158.1  |        | 1  |

Gene symbol: BC023882

Protein name: CDNA sequence BC023882

Protein accession numbers: IPI00387484

Peptide sequence: (K)HWDTYRQLESLVQQLSQR(N)

Exclusive (unique to this protein): TRUE

SEQUEST XCorr score: 2.14 SEQUEST DCn score: 0.396

Fix modifications: None

Variable modifications: None

charge: 2

Observed m/z: 1144.0933

Actual minus calculated peptide mass (AMU): 0.020254

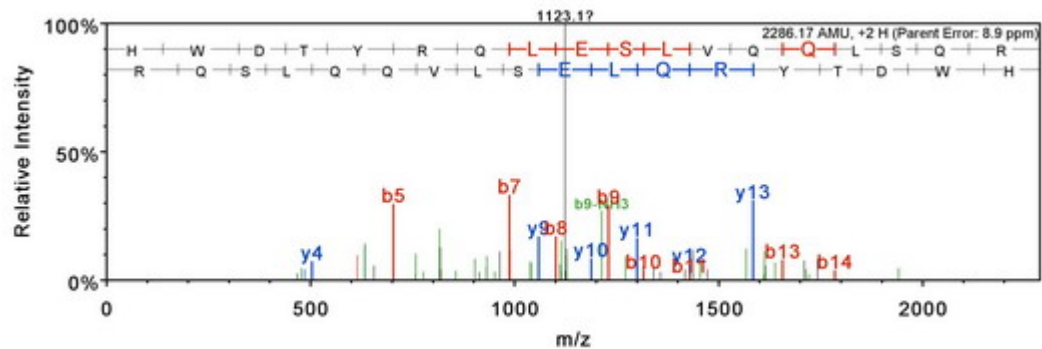

| B  | B Ions | B+2H   | B-NH3  | B-H2O  | AA | Y Ions | Y+2H   | Y-NH3  | Y-H2O  | Y  |
|----|--------|--------|--------|--------|----|--------|--------|--------|--------|----|
| 1  | 138.1  | 69.5   |        |        | H  | 2287.2 | 1144.1 | 2270.1 | 2269.2 | 18 |
| 2  | 324.2  | 162.6  |        |        | W  | 2150.1 | 1075.5 | 2133.1 | 2132.1 | 17 |
| 3  | 439.2  | 220.1  |        | 421.2  | D  | 1964.0 | 982.5  | 1947.0 | 1946.0 | 16 |
| 4  | 540.2  | 270.6  |        | 522.2  | T  | 1849.0 | 925.0  | 1832.0 | 1831.0 | 15 |
| 5  | 703.3  | 352.2  |        | 685.3  | Y  | 1748.0 | 874.5  | 1730.9 | 1729.9 | 14 |
| 6  | 859.4  | 430.2  | 842.4  | 841.4  | R  | 1584.9 | 793.0  | 1567.9 | 1566.9 | 13 |
| 7  | 987.4  | 494.2  | 970.4  | 969.4  | Q  | 1428.8 | 714.9  | 1411.8 | 1410.8 | 12 |
| 8  | 1100.5 | 550.8  | 1083.5 | 1082.5 | L  | 1300.7 | 650.9  | 1283.7 | 1282.7 | 11 |
| 9  | 1229.6 | 615.3  | 1212.5 | 1211.6 | E  | 1187.6 | 594.3  | 1170.6 | 1169.6 | 10 |
| 10 | 1316.6 | 658.8  | 1299.6 | 1298.6 | S  | 1058.6 | 529.8  | 1041.6 | 1040.6 | 9  |
| 11 | 1429.7 | 715.4  | 1412.7 | 1411.7 | L  | 971.6  | 486.3  | 954.5  | 953.6  | 8  |
| 12 | 1528.8 | 764.9  | 1511.7 | 1510.7 | V  | 858.5  | 429.7  | 841.5  | 840.5  | 7  |
| 13 | 1656.8 | 828.9  | 1639.8 | 1638.8 | Q  | 759.4  | 380.2  | 742.4  | 741.4  | 6  |
| 14 | 1784.9 | 892.9  | 1767.9 | 1766.9 | Q  | 631.4  |        | 614.3  | 613.3  | 5  |
| 15 | 1898.0 | 949.5  | 1880.9 | 1880.0 | L  | 503.3  |        | 486.3  | 485.3  | 4  |
| 16 | 1985.0 | 993.0  | 1968.0 | 1967.0 | S  | 390.2  |        | 373.2  | 372.2  | 3  |
| 17 | 2113.1 | 1057.0 | 2096.0 | 2095.0 | Q  | 303.2  |        | 286.2  |        | 2  |
| 18 | 2287.2 | 1144.1 | 2270.1 | 2269.2 | R  | 175.1  |        | 158.1  |        | 1  |

Gene symbol: Bcap31

Protein name: B-cell receptor-associated protein 31

Protein accession numbers: IPI00230422,IPI00828225

Peptide sequence: (R)LVTLISQQATLLASNEAFK(K)

Exclusive (unique to this protein): TRUE

SEQUEST XCorr score: 3.01 SEQUEST DCn score: 0.716

Fix modifications: None

Variable modifications: None

charge: 2

Observed m/z: 1024.0746

Actual minus calculated peptide mass (AMU): -0.002686

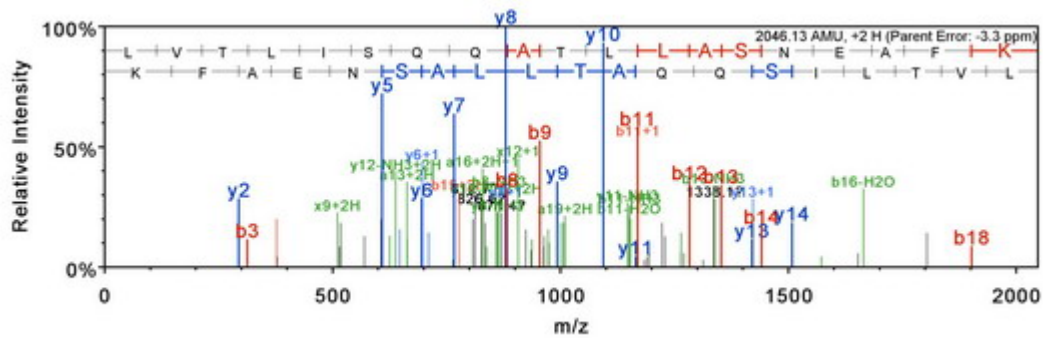

| B  | B Ions | B+2H   | B-NH3  | B-H2O  | AA | Y Ions | Y+2H   | Y-NH3  | Y-H2O  | Y  |
|----|--------|--------|--------|--------|----|--------|--------|--------|--------|----|
| 1  | 138.1  | 69.5   |        |        | H  | 2287.2 | 1144.1 | 2270.1 | 2269.2 | 18 |
| 2  | 324.2  | 162.6  |        |        | W  | 2150.1 | 1075.5 | 2133.1 | 2132.1 | 17 |
| 3  | 439.2  | 220.1  |        | 421.2  | D  | 1964.0 | 982.5  | 1947.0 | 1946.0 | 16 |
| 4  | 540.2  | 270.6  |        | 522.2  | T  | 1849.0 | 925.0  | 1832.0 | 1831.0 | 15 |
| 5  | 703.3  | 352.2  |        | 685.3  | Y  | 1748.0 | 874.5  | 1730.9 | 1729.9 | 14 |
| 6  | 859.4  | 430.2  | 842.4  | 841.4  | R  | 1584.9 | 793.0  | 1567.9 | 1566.9 | 13 |
| 7  | 987.4  | 494.2  | 970.4  | 969.4  | Q  | 1428.8 | 714.9  | 1411.8 | 1410.8 | 12 |
| 8  | 1100.5 | 550.8  | 1083.5 | 1082.5 | L  | 1300.7 | 650.9  | 1283.7 | 1282.7 | 11 |
| 9  | 1229.6 | 615.3  | 1212.5 | 1211.6 | E  | 1187.6 | 594.3  | 1170.6 | 1169.6 | 10 |
| 10 | 1316.6 | 658.8  | 1299.6 | 1298.6 | S  | 1058.6 | 529.8  | 1041.6 | 1040.6 | 9  |
| 11 | 1429.7 | 715.4  | 1412.7 | 1411.7 | L  | 971.6  | 486.3  | 954.5  | 953.6  | 8  |
| 12 | 1528.8 | 764.9  | 1511.7 | 1510.7 | V  | 858.5  | 429.7  | 841.5  | 840.5  | 7  |
| 13 | 1656.8 | 828.9  | 1639.8 | 1638.8 | Q  | 759.4  | 380.2  | 742.4  | 741.4  | 6  |
| 14 | 1784.9 | 892.9  | 1767.9 | 1766.9 | Q  | 631.4  |        | 614.3  | 613.3  | 5  |
| 15 | 1898.0 | 949.5  | 1880.9 | 1880.0 | L  | 503.3  |        | 486.3  | 485.3  | 4  |
| 16 | 1985.0 | 993.0  | 1968.0 | 1967.0 | S  | 390.2  |        | 373.2  | 372.2  | 3  |
| 17 | 2113.1 | 1057.0 | 2096.0 | 2095.0 | Q  | 303.2  |        | 286.2  |        | 2  |
| 18 | 2287.2 | 1144.1 | 2270.1 | 2269.2 | R  | 175.1  |        | 158.1  |        | 1  |

Gene symbol: C1qbp

Protein name: complement component 1, q subcomponent binding protein

Protein accession numbers: IPI00132799

Peptide sequence: (K)AEEQEPELTSTPNFVVEVTK(T)

Exclusive (unique to this protein): TRUE

SEQUEST XCorr score: 2.12 SEQUEST DCn score: 0.582

Fix modifications: None

Variable modifications: None

charge: 2

Observed m/z: 1124.0574

Actual minus calculated peptide mass (AMU): 0.0039054

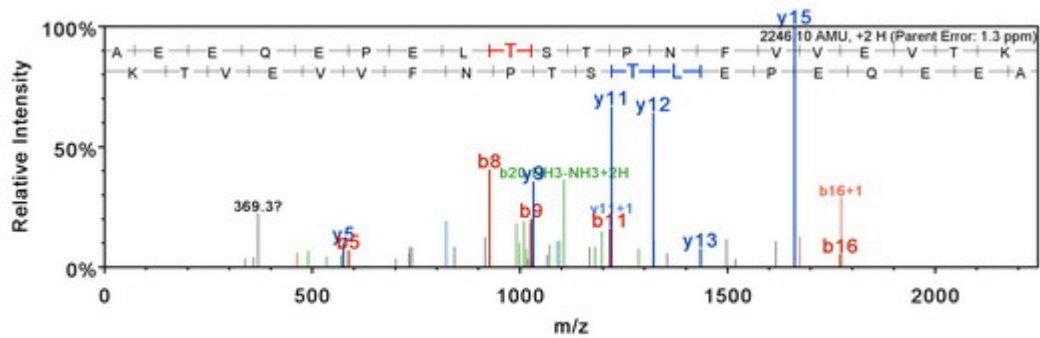



| B  | B Ions | B+2H   | B-NH3  | B-H2O  | AA | Y Ions | Y+2H   | Y-NH3  | Y-H2O  | Y  |
|----|--------|--------|--------|--------|----|--------|--------|--------|--------|----|
| 1  | 72.0   |        |        |        | A  | 2247.1 | 1124.1 | 2230.1 | 2229.1 | 20 |
| 2  | 201.1  |        |        | 183.1  | E  | 2176.1 | 1088.5 | 2159.0 | 2158.1 | 19 |
| 3  | 330.1  |        |        | 312.1  | E  | 2047.0 | 1024.0 | 2030.0 | 2029.0 | 18 |
| 4  | 458.2  |        | 441.2  | 440.2  | Q  | 1918.0 | 959.5  | 1901.0 | 1900.0 | 17 |
| 5  | 587.2  |        | 570.2  | 569.2  | E  | 1789.9 | 895.5  | 1772.9 | 1771.9 | 16 |
| 6  | 684.3  | 342.7  | 667.3  | 666.3  | P  | 1660.9 | 830.9  | 1643.9 | 1642.9 | 15 |
| 7  | 813.3  | 407.2  | 796.3  | 795.3  | E  | 1563.8 | 782.4  | 1546.8 | 1545.8 | 14 |
| 8  | 926.4  | 463.7  | 909.4  | 908.4  | L  | 1434.8 | 717.9  | 1417.8 | 1416.8 | 13 |
| 9  | 1027.5 | 514.2  | 1010.4 | 1009.5 | T  | 1321.7 | 661.4  | 1304.7 | 1303.7 | 12 |
| 10 | 1114.5 | 557.8  | 1097.5 | 1096.5 | S  | 1220.7 | 610.8  | 1203.6 | 1202.6 | 11 |
| 11 | 1215.5 | 608.3  | 1198.5 | 1197.5 | T  | 1133.6 | 567.3  | 1116.6 | 1115.6 | 10 |
| 12 | 1312.6 | 656.8  | 1295.6 | 1294.6 | P  | 1032.6 | 516.8  | 1015.6 | 1014.6 | 9  |
| 13 | 1426.6 | 713.8  | 1409.6 | 1408.6 | N  | 935.5  | 468.3  | 918.5  | 917.5  | 8  |
| 14 | 1573.7 | 787.4  | 1556.7 | 1555.7 | F  | 821.5  | 411.2  | 804.5  | 803.5  | 7  |
| 15 | 1672.8 | 836.9  | 1655.7 | 1654.8 | V  | 674.4  | 337.7  | 657.4  | 656.4  | 6  |
| 16 | 1771.8 | 886.4  | 1754.8 | 1753.8 | V  | 575.3  |        | 558.3  | 557.3  | 5  |
| 17 | 1900.9 | 950.9  | 1883.9 | 1882.9 | E  | 476.3  |        | 459.3  | 458.3  | 4  |
| 18 | 2000.0 | 1000.5 | 1982.9 | 1981.9 | V  | 347.2  |        | 330.2  | 329.2  | 3  |
| 19 | 2101.0 | 1051.0 | 2084.0 | 2083.0 | T  | 248.2  |        | 231.1  | 230.2  | 2  |
| 20 | 2247.1 | 1124.1 | 2230.1 | 2229.1 | K  | 147.1  |        | 130.1  |        | 1  |

Gene symbol: C730024G19Rik

Protein name: similar to F-box/LRR-repeat protein 20 (F-box and leucine-rich repeat protein 20) (F-box/LRR-repeat protein 2-like) isoform 1

Protein accession numbers: IPI00658665,IPI00674232,IPI00761387

Peptide sequence: (R)ITDSNISEVLHPEVQR(L)

Exclusive (unique to this protein): TRUE

SEQUEST XCorr score: 2.54 SEQUEST DCn score: 0.524

Fix modifications: None

Variable modifications: None

charge: 2

Observed m/z: 918.9774

Actual minus calculated peptide mass (AMU): 0.001343

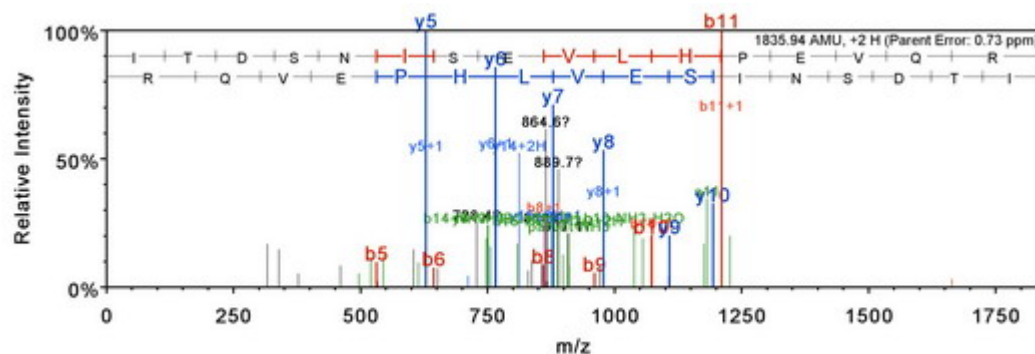

| B  | B Ions | B+2H  | B-NH3  | B-H2O  | AA | Y Ions | Y+2H  | Y-NH3  | Y-H2O  | Y  |
|----|--------|-------|--------|--------|----|--------|-------|--------|--------|----|
| 1  | 114.1  |       |        |        | I  | 1837.0 | 919.0 | 1819.9 | 1818.9 | 16 |
| 2  | 215.1  |       |        | 197.1  | T  | 1723.9 | 862.4 | 1706.8 | 1705.9 | 15 |
| 3  | 330.2  |       |        | 312.2  | D  | 1622.8 | 811.9 | 1605.8 | 1604.8 | 14 |
| 4  | 417.2  |       |        | 399.2  | S  | 1507.8 | 754.4 | 1490.8 | 1489.8 | 13 |
| 5  | 531.2  |       | 514.2  | 513.2  | N  | 1420.8 | 710.9 | 1403.7 | 1402.7 | 12 |
| 6  | 644.3  | 322.7 | 627.3  | 626.3  | I  | 1306.7 | 653.9 | 1289.7 | 1288.7 | 11 |
| 7  | 731.4  | 366.2 | 714.3  | 713.4  | S  | 1193.6 | 597.3 | 1176.6 | 1175.6 | 10 |
| 8  | 860.4  | 430.7 | 843.4  | 842.4  | E  | 1106.6 | 553.8 | 1089.6 | 1088.6 | 9  |
| 9  | 959.5  | 480.2 | 942.4  | 941.5  | V  | 977.6  | 489.3 | 960.5  | 959.5  | 8  |
| 10 | 1072.5 | 536.8 | 1055.5 | 1054.5 | L  | 878.5  | 439.8 | 861.5  | 860.5  | 7  |
| 11 | 1209.6 | 605.3 | 1192.6 | 1191.6 | H  | 765.4  | 383.2 | 748.4  | 747.4  | 6  |
| 12 | 1306.7 | 653.8 | 1289.6 | 1288.7 | P  | 628.3  |       | 611.3  | 610.3  | 5  |
| 13 | 1435.7 | 718.4 | 1418.7 | 1417.7 | E  | 531.3  |       | 514.3  | 513.3  | 4  |
| 14 | 1534.8 | 767.9 | 1517.8 | 1516.8 | V  | 402.3  |       | 385.2  |        | 3  |
| 15 | 1662.8 | 831.9 | 1645.8 | 1644.8 | Q  | 303.2  |       | 286.2  |        | 2  |
| 16 | 1837.0 | 919.0 | 1819.9 | 1818.9 | R  | 175.1  |       | 158.1  |        | 1  |

Gene symbol: Calm3;Calm1;Calm2

Protein name: 12 days pregnant adult female placenta cDNA, RIKEN full-length enriched library, clone:I530005B05 product:calmodulin 1, full insert sequence

Protein accession numbers: IPI00467841,IPI00761696

Peptide sequence: (R)VFDKDGNGYISAAELR(H)

Exclusive (unique to this protein): TRUE

SEQUEST XCorr score: 2.6 SEQUEST DCn score: 0.59

Fix modifications: None

Variable modifications: None

charge: 2 Observed m/z: 877.941

Actual minus calculated peptide mass (AMU): 0.002686

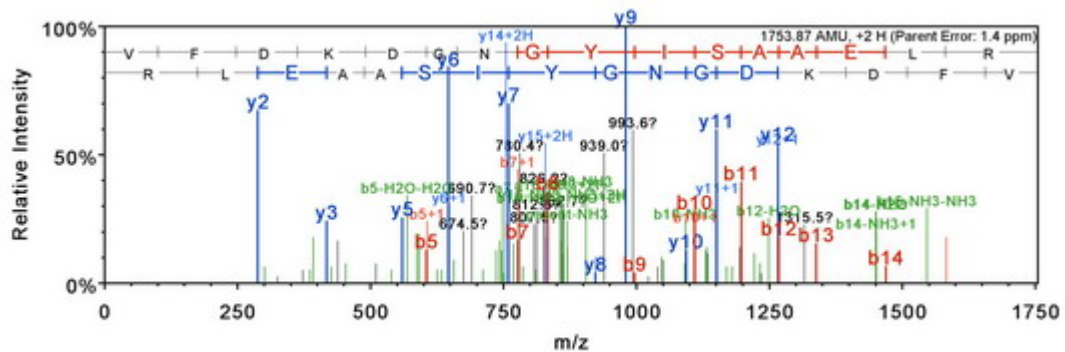

| B  | B Ions | B+2H  | B-NH3  | B-H2O  | AA | Y Ions | Y+2H  | Y-NH3  | Y-H2O  | Y  |
|----|--------|-------|--------|--------|----|--------|-------|--------|--------|----|
| 1  | 100.1  |       |        |        | V  | 1754.9 | 877.9 | 1737.8 | 1736.9 | 16 |
| 2  | 247.1  |       |        |        | F  | 1655.8 | 828.4 | 1638.8 | 1637.8 | 15 |
| 3  | 362.2  |       |        | 344.2  | D  | 1508.7 | 754.9 | 1491.7 | 1490.7 | 14 |
| 4  | 490.3  | 245.6 | 473.2  | 472.3  | K  | 1393.7 | 697.4 | 1376.7 | 1375.7 | 13 |
| 5  | 605.3  | 303.2 | 588.3  | 587.3  | D  | 1265.6 | 633.3 | 1248.6 | 1247.6 | 12 |
| 6  | 662.3  | 331.7 | 645.3  | 644.3  | G  | 1150.6 | 575.8 | 1133.6 | 1132.6 | 11 |
| 7  | 776.4  | 388.7 | 759.3  | 758.4  | N  | 1093.6 | 547.3 | 1076.5 | 1075.5 | 10 |
| 8  | 833.4  | 417.2 | 816.4  | 815.4  | G  | 979.5  | 490.3 | 962.5  | 961.5  | 9  |
| 9  | 996.4  | 498.7 | 979.4  | 978.4  | Y  | 922.5  | 461.8 | 905.5  | 904.5  | 8  |
| 10 | 1109.5 | 555.3 | 1092.5 | 1091.5 | I  | 759.4  | 380.2 | 742.4  | 741.4  | 7  |
| 11 | 1196.6 | 598.8 | 1179.5 | 1178.5 | S  | 646.4  | 323.7 | 629.3  | 628.3  | 6  |
| 12 | 1267.6 | 634.3 | 1250.6 | 1249.6 | A  | 559.3  |       | 542.3  | 541.3  | 5  |
| 13 | 1338.6 | 669.8 | 1321.6 | 1320.6 | A  | 488.3  |       | 471.3  | 470.3  | 4  |
| 14 | 1467.7 | 734.3 | 1450.7 | 1449.7 | E  | 417.3  |       | 400.2  | 399.2  | 3  |
| 15 | 1580.8 | 790.9 | 1563.7 | 1562.8 | L  | 288.2  |       | 271.2  |        | 2  |
| 16 | 1754.9 | 877.9 | 1737.8 | 1736.9 | R  | 175.1  |       | 158.1  |        | 1  |

Gene symbol: Calr

Protein name: Calreticulin precursor

Protein accession numbers: IPI00123639

Peptide sequence: (K)EQFLDGDWNTNR(W)

Exclusive (unique to this protein): TRUE

SEQUEST XCorr score: 2.15 SEQUEST DCn score: 0.604

Fix modifications: None

Variable modifications: None

charge: 2

Observed m/z: 726.3289

Actual minus calculated peptide mass (AMU): -0.005737

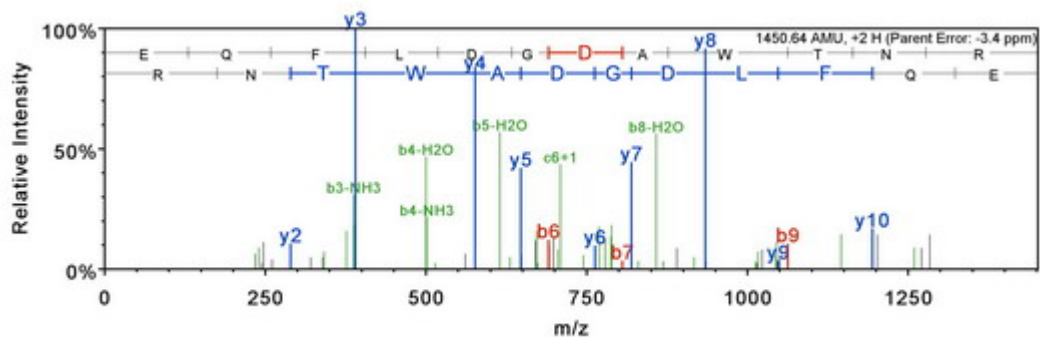

| B  | B Ions | B+2H  | B-NH3  | B-H2O  | AA | Y Ions | Y+2H  | Y-NH3  | Y-H2O  | Y  |
|----|--------|-------|--------|--------|----|--------|-------|--------|--------|----|
| 1  | 130.1  |       |        | 112.0  | E  | 1451.7 | 726.3 | 1434.6 | 1433.7 | 12 |
| 2  | 258.1  |       | 241.1  | 240.1  | Q  | 1322.6 | 661.8 | 1305.6 | 1304.6 | 11 |
| 3  | 405.2  |       | 388.2  | 387.2  | F  | 1194.5 | 597.8 | 1177.5 | 1176.5 | 10 |
| 4  | 518.3  |       | 501.2  | 500.3  | L  | 1047.5 | 524.3 | 1030.5 | 1029.5 | 9  |
| 5  | 633.3  |       | 616.3  | 615.3  | D  | 934.4  | 467.7 | 917.4  | 916.4  | 8  |
| 6  | 690.3  | 345.7 | 673.3  | 672.3  | G  | 819.4  | 410.2 | 802.4  | 801.4  | 7  |
| 7  | 805.3  | 403.2 | 788.3  | 787.3  | D  | 762.4  | 381.7 | 745.3  | 744.3  | 6  |
| 8  | 876.4  | 438.7 | 859.4  | 858.4  | A  | 647.3  |       | 630.3  | 629.3  | 5  |
| 9  | 1062.5 | 531.7 | 1045.4 | 1044.4 | W  | 576.3  |       | 559.3  | 558.3  | 4  |
| 10 | 1163.5 | 582.3 | 1146.5 | 1145.5 | T  | 390.2  |       | 373.2  | 372.2  | 3  |
| 11 | 1277.5 | 639.3 | 1260.5 | 1259.5 | N  | 289.2  |       | 272.1  |        | 2  |
| 12 | 1451.7 | 726.3 | 1434.6 | 1433.7 | R  | 175.1  |       | 158.1  |        | 1  |

Gene symbol: Cap1

Protein name: Adenylyl cyclase-associated protein 1

Protein accession numbers: IPI00137331

Peptide sequence: (R)VENQENVSNLVIDDTELK(Q)

Exclusive (unique to this protein): TRUE

SEQUEST XCorr score: 2.07 SEQUEST DCn score: 0.646

Fix modifications: None

Variable modifications: None

charge: 2

Observed m/z: 1030.0109

Actual minus calculated peptide mass (AMU): -0.0056153

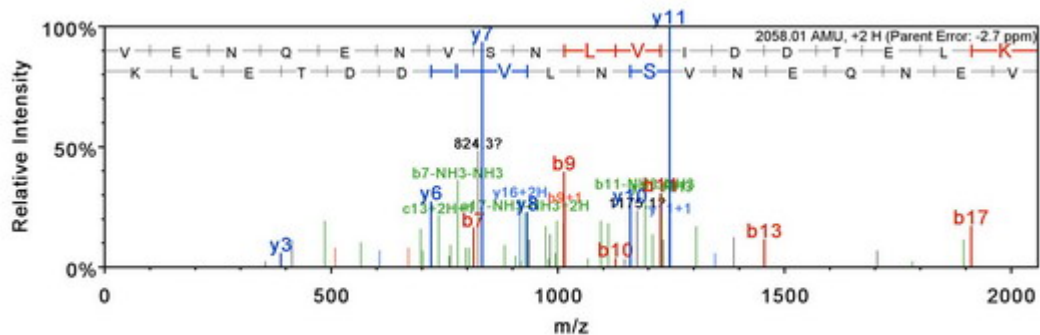

| B  | B Ions | B+2H   | B-NH3  | B-H2O  | AA | Y Ions | Y+2H   | Y-NH3  | Y-H2O  | Y  |
|----|--------|--------|--------|--------|----|--------|--------|--------|--------|----|
| 1  | 100.1  |        |        |        | V  | 2059.0 | 1030.0 | 2042.0 | 2041.0 | 18 |
| 2  | 229.1  |        |        | 211.1  | E  | 1960.0 | 980.5  | 1942.9 | 1941.9 | 17 |
| 3  | 343.2  |        | 326.1  | 325.2  | N  | 1830.9 | 916.0  | 1813.9 | 1812.9 | 16 |
| 4  | 471.2  |        | 454.2  | 453.2  | Q  | 1716.9 | 858.9  | 1699.8 | 1698.9 | 15 |
| 5  | 600.3  |        | 583.2  | 582.3  | E  | 1588.8 | 794.9  | 1571.8 | 1570.8 | 14 |
| 6  | 714.3  | 357.7  | 697.3  | 696.3  | N  | 1459.8 | 730.4  | 1442.7 | 1441.8 | 13 |
| 7  | 813.4  | 407.2  | 796.4  | 795.4  | V  | 1345.7 | 673.4  | 1328.7 | 1327.7 | 12 |
| 8  | 900.4  | 450.7  | 883.4  | 882.4  | S  | 1246.7 | 623.8  | 1229.6 | 1228.6 | 11 |
| 9  | 1014.5 | 507.7  | 997.4  | 996.4  | N  | 1159.6 | 580.3  | 1142.6 | 1141.6 | 10 |
| 10 | 1127.5 | 564.3  | 1110.5 | 1109.5 | L  | 1045.6 | 523.3  | 1028.5 | 1027.6 | 9  |
| 11 | 1226.6 | 613.8  | 1209.6 | 1208.6 | V  | 932.5  | 466.8  | 915.5  | 914.5  | 8  |
| 12 | 1339.7 | 670.4  | 1322.7 | 1321.7 | I  | 833.4  | 417.2  | 816.4  | 815.4  | 7  |
| 13 | 1454.7 | 727.9  | 1437.7 | 1436.7 | D  | 720.3  | 360.7  | 703.3  | 702.3  | 6  |
| 14 | 1569.7 | 785.4  | 1552.7 | 1551.7 | D  | 605.3  |        | 588.3  | 587.3  | 5  |
| 15 | 1670.8 | 835.9  | 1653.8 | 1652.8 | T  | 490.3  |        | 473.3  | 472.3  | 4  |
| 16 | 1799.8 | 900.4  | 1782.8 | 1781.8 | E  | 389.2  |        | 372.2  | 371.2  | 3  |
| 17 | 1912.9 | 957.0  | 1895.9 | 1894.9 | L  | 260.2  |        | 243.2  |        | 2  |
| 18 | 2059.0 | 1030.0 | 2042.0 | 2041.0 | K  | 147.1  |        | 130.1  |        | 1  |

Gene symbol: Capza1

Protein name: F-actin capping protein subunit alpha-1

Protein accession numbers: IPI00330063,IPI00653841,IPI00848950

Peptide sequence: (R)LLLNNDNLLR(E)

Exclusive (unique to this protein): TRUE

SEQUEST XCorr score: 2.19 SEQUEST DCn score: 0.555

Fix modifications: None

Variable modifications: None

charge: 2

Observed m/z: 599.3509

Actual minus calculated peptide mass (AMU): -0.001709

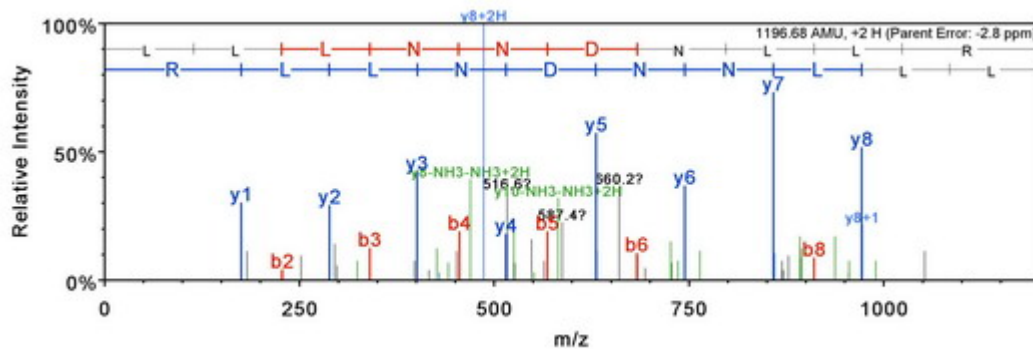

| B  | B Ions | B+2H  | B-NH3  | B-H2O  | AA | Y Ions | Y+2H  | Y-NH3  | Y-H2O  | Y  |
|----|--------|-------|--------|--------|----|--------|-------|--------|--------|----|
| 1  | 114.1  |       |        |        | L  | 1197.7 | 599.4 | 1180.7 | 1179.7 | 10 |
| 2  | 227.2  |       |        |        | L  | 1084.6 | 542.8 | 1067.6 | 1066.6 | 9  |
| 3  | 340.3  |       |        |        | L  | 971.5  | 486.3 | 954.5  | 953.5  | 8  |
| 4  | 454.3  |       | 437.3  |        | N  | 858.4  | 429.7 | 841.4  | 840.4  | 7  |
| 5  | 568.4  |       | 551.3  |        | N  | 744.4  | 372.7 | 727.4  | 726.4  | 6  |
| 6  | 683.4  | 342.2 | 666.4  | 665.4  | D  | 630.4  |       | 613.3  | 612.4  | 5  |
| 7  | 797.4  | 399.2 | 780.4  | 779.4  | N  | 515.3  |       | 498.3  |        | 4  |
| 8  | 910.5  | 455.8 | 893.5  | 892.5  | L  | 401.3  |       | 384.3  |        | 3  |
| 9  | 1023.6 | 512.3 | 1006.6 | 1005.6 | L  | 288.2  |       | 271.2  |        | 2  |
| 10 | 1197.7 | 599.4 | 1180.7 | 1179.7 | R  | 175.1  |       | 158.1  |        | 1  |

Gene symbol: Carhsp1

Protein name: Calcium-regulated heat stable protein 1

Protein accession numbers: IPI00133349,IPI00475159

Peptide sequence: (K)LQAVEVVITHLAPGK(H)

Exclusive (unique to this protein): TRUE

SEQUEST XCorr score: 2.13 SEQUEST DCn score: 0.515

Fix modifications: None

Variable modifications: None

charge: 2

Observed m/z: 838.4866

Actual minus calculated peptide mass (AMU): -0.009644

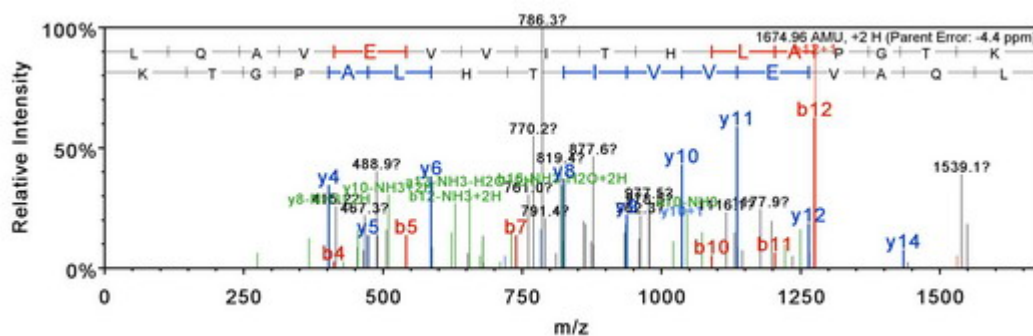

| B  | B Ions | B+2H  | B-NH3  | B-H2O  | AA | Y Ions | Y+2H  | Y-NH3  | Y-H2O  | Y  |
|----|--------|-------|--------|--------|----|--------|-------|--------|--------|----|
| 1  | 114.1  |       |        |        | L  | 1676.0 | 838.5 | 1659.0 | 1658.0 | 16 |
| 2  | 242.2  |       | 225.1  |        | Q  | 1562.9 | 782.0 | 1545.9 | 1544.9 | 15 |
| 3  | 313.2  |       | 296.2  |        | A  | 1434.8 | 717.9 | 1417.8 | 1416.8 | 14 |
| 4  | 412.3  |       | 395.2  |        | V  | 1363.8 | 682.4 | 1346.8 | 1345.8 | 13 |
| 5  | 541.3  |       | 524.3  | 523.3  | E  | 1264.7 | 632.9 | 1247.7 | 1246.7 | 12 |
| 6  | 640.4  | 320.7 | 623.3  | 622.4  | V  | 1135.7 | 568.4 | 1118.7 | 1117.7 | 11 |
| 7  | 739.4  | 370.2 | 722.4  | 721.4  | V  | 1036.6 | 518.8 | 1019.6 | 1018.6 | 10 |
| 8  | 852.5  | 426.8 | 835.5  | 834.5  | I  | 937.6  | 469.3 | 920.5  | 919.5  | 9  |
| 9  | 953.6  | 477.3 | 936.5  | 935.6  | T  | 824.5  | 412.7 | 807.4  | 806.5  | 8  |
| 10 | 1090.6 | 545.8 | 1073.6 | 1072.6 | H  | 723.4  | 362.2 | 706.4  | 705.4  | 7  |
| 11 | 1203.7 | 602.4 | 1186.7 | 1185.7 | L  | 586.4  | 293.7 | 569.3  | 568.4  | 6  |
| 12 | 1274.8 | 637.9 | 1257.7 | 1256.7 | A  | 473.3  |       | 456.3  | 455.3  | 5  |
| 13 | 1371.8 | 686.4 | 1354.8 | 1353.8 | P  | 402.2  |       | 385.2  | 384.2  | 4  |
| 14 | 1428.8 | 714.9 | 1411.8 | 1410.8 | G  | 305.2  |       | 288.2  | 287.2  | 3  |
| 15 | 1529.9 | 765.4 | 1512.8 | 1511.9 | T  | 248.2  |       | 231.1  | 230.2  | 2  |
| 16 | 1676.0 | 838.5 | 1659.0 | 1658.0 | K  | 147.1  |       | 130.1  |        | 1  |

Gene symbol: Ccdc117

Protein name: Coiled-coil domain-containing protein 117

Protein accession numbers: IPI00321929

Peptide sequence: (R)TEGLLEPQCADAPLYR(S)

Exclusive (unique to this protein): TRUE

SEQUEST XCorr score: 2.17 SEQUEST DCn score: 0.633

Fix modifications: C9: Carbamidomethyl (+57.02) Variable modifications: None  
charge: 2 Observed m/z: 916.9447

Actual minus calculated peptide mass (AMU): -0.0040256

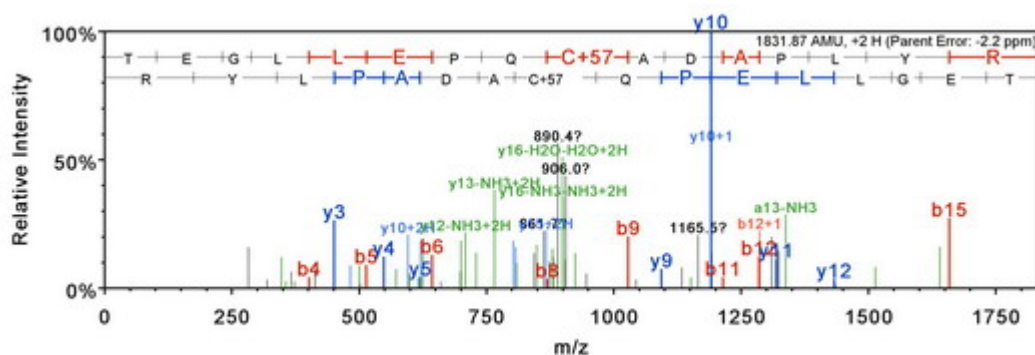

| B  | B ions | B+2H  | B-NH3  | B-H2O  | A,A  | Y ions | Y+2H  | Y-NH3  | Y-H2O  | Y  |
|----|--------|-------|--------|--------|------|--------|-------|--------|--------|----|
| 1  | 102.1  |       |        | 84.0   | T    | 1832.9 | 917.0 | 1815.9 | 1814.9 | 16 |
| 2  | 231.1  |       |        | 213.1  | E    | 1731.8 | 866.4 | 1714.8 | 1713.8 | 15 |
| 3  | 288.1  |       |        | 270.1  | G    | 1602.8 | 801.9 | 1585.8 | 1584.8 | 14 |
| 4  | 401.2  |       |        | 383.2  | L    | 1545.8 | 773.4 | 1528.8 | 1527.8 | 13 |
| 5  | 514.3  |       |        | 496.3  | L    | 1432.7 | 716.9 | 1415.7 | 1414.7 | 12 |
| 6  | 643.3  | 322.2 |        | 625.3  | E    | 1319.6 | 660.3 | 1302.6 | 1301.6 | 11 |
| 7  | 740.4  | 370.7 |        | 722.4  | P    | 1190.6 | 595.8 | 1173.5 | 1172.5 | 10 |
| 8  | 868.4  | 434.7 | 851.4  | 850.4  | Q    | 1093.5 | 547.3 | 1076.5 | 1075.5 | 9  |
| 9  | 1028.5 | 514.7 | 1011.5 | 1010.5 | C+57 | 965.5  | 483.2 | 948.4  | 947.4  | 8  |
| 10 | 1099.5 | 550.3 | 1082.5 | 1081.5 | A    | 805.4  | 403.2 | 788.4  | 787.4  | 7  |
| 11 | 1214.5 | 607.8 | 1197.5 | 1196.5 | D    | 734.4  | 367.7 | 717.4  | 716.4  | 6  |
| 12 | 1285.6 | 643.3 | 1268.5 | 1267.6 | A    | 619.4  |       | 602.3  |        | 5  |
| 13 | 1382.6 | 691.8 | 1365.6 | 1364.6 | P    | 548.3  |       | 531.3  |        | 4  |
| 14 | 1495.7 | 748.4 | 1478.7 | 1477.7 | L    | 451.3  |       | 434.2  |        | 3  |
| 15 | 1658.8 | 829.9 | 1641.8 | 1640.8 | Y    | 338.2  |       | 321.2  |        | 2  |
| 16 | 1832.9 | 917.0 | 1815.9 | 1814.9 | R    | 175.1  |       | 158.1  |        | 1  |

Gene symbol: Cct5

Protein name: T-complex protein 1 subunit epsilon

Protein accession numbers: IPI00116279

Peptide sequence: (K)VLVDINNPEPLIQTAK(T)

Exclusive (unique to this protein): TRUE

SEQUEST XCorr score: 2.18 SEQUEST DCn score: 0.615

Fix modifications: None

Variable modifications: None

charge: 2

Observed m/z: 882.4982

Actual minus calculated peptide mass (AMU): -0.002564

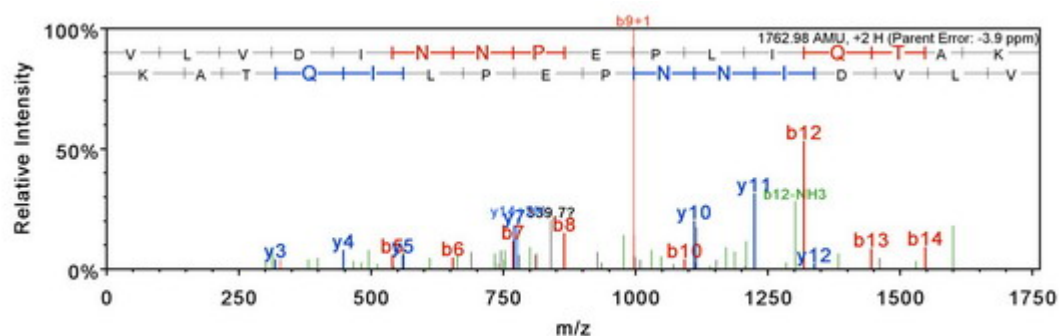

| B  | B ions | B+2H  | B-NH3  | B-H2O  | AA | Y ions | Y+2H  | Y-NH3  | Y-H2O  | Y  |
|----|--------|-------|--------|--------|----|--------|-------|--------|--------|----|
| 1  | 100.1  |       |        |        | V  | 1764.0 | 882.5 | 1747.0 | 1746.0 | 16 |
| 2  | 213.2  |       |        |        | L  | 1664.9 | 833.0 | 1647.9 | 1646.9 | 15 |
| 3  | 312.2  |       |        |        | V  | 1551.8 | 776.4 | 1534.8 | 1533.8 | 14 |
| 4  | 427.3  |       |        | 409.3  | D  | 1452.8 | 726.9 | 1435.7 | 1434.8 | 13 |
| 5  | 540.3  |       |        | 522.3  | I  | 1337.7 | 669.4 | 1320.7 | 1319.7 | 12 |
| 6  | 654.4  | 327.7 | 637.4  | 636.4  | N  | 1224.7 | 612.8 | 1207.6 | 1206.7 | 11 |
| 7  | 768.4  | 384.7 | 751.4  | 750.4  | N  | 1110.6 | 555.8 | 1093.6 | 1092.6 | 10 |
| 8  | 865.5  | 433.2 | 848.5  | 847.5  | P  | 996.6  | 498.8 | 979.6  | 978.6  | 9  |
| 9  | 994.5  | 497.8 | 977.5  | 976.5  | E  | 899.5  | 450.3 | 882.5  | 881.5  | 8  |
| 10 | 1091.6 | 546.3 | 1074.5 | 1073.6 | P  | 770.5  | 385.7 | 753.5  | 752.5  | 7  |
| 11 | 1204.7 | 602.8 | 1187.6 | 1186.7 | L  | 673.4  | 337.2 | 656.4  | 655.4  | 6  |
| 12 | 1317.7 | 659.4 | 1300.7 | 1299.7 | I  | 560.3  |       | 543.3  | 542.3  | 5  |
| 13 | 1445.8 | 723.4 | 1428.8 | 1427.8 | Q  | 447.3  |       | 430.2  | 429.3  | 4  |
| 14 | 1546.9 | 773.9 | 1529.8 | 1528.8 | T  | 319.2  |       | 302.2  | 301.2  | 3  |
| 15 | 1617.9 | 809.5 | 1600.9 | 1599.9 | A  | 218.2  |       | 201.1  |        | 2  |
| 16 | 1764.0 | 882.5 | 1747.0 | 1746.0 | K  | 147.1  |       | 130.1  |        | 1  |

Gene symbol: Cdo1

Protein name: Cysteine dioxygenase type 1

Protein accession numbers: IPI00134144

Peptide sequence: (R)ENQCA<sup>Y</sup>INDSIGLHR(V)

Exclusive (unique to this protein): TRUE

SEQUEST XCorr score: 2.67 SEQUEST DCn score: 0.645

Fix modifications: C4: Carbamidomethyl (+57.02) Variable modifications: None

charge: 2

Observed m/z: 895.421

Actual minus calculated peptide mass (AMU): 0.005005



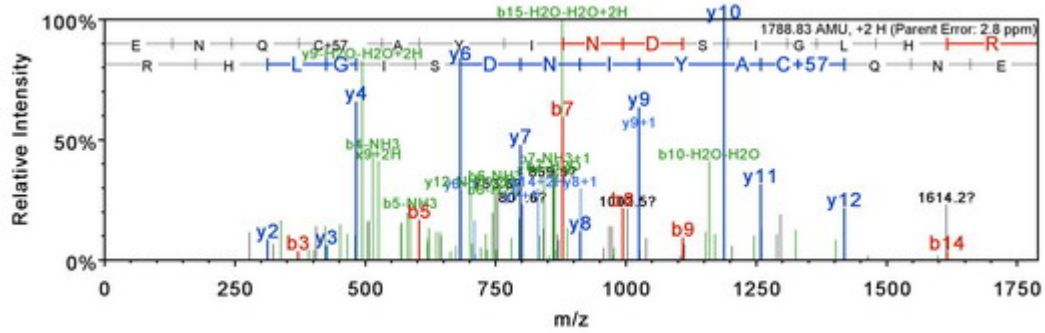

| B  | B ions | B+2H  | B-NH3  | B-H2O  | AA   | Y ions | Y+2H  | Y-NH3  | Y-H2O  | Y  |
|----|--------|-------|--------|--------|------|--------|-------|--------|--------|----|
| 1  | 130.1  |       |        | 112.0  | E    | 1789.8 | 895.4 | 1772.8 | 1771.8 | 15 |
| 2  | 244.1  |       | 227.1  | 226.1  | N    | 1660.8 | 830.9 | 1643.8 | 1642.8 | 14 |
| 3  | 372.2  |       | 355.1  | 354.1  | Q    | 1546.7 | 773.9 | 1529.7 | 1528.7 | 13 |
| 4  | 532.2  |       | 515.2  | 514.2  | C+57 | 1418.7 | 709.9 | 1401.7 | 1400.7 | 12 |
| 5  | 603.2  |       | 586.2  | 585.2  | A    | 1258.7 | 629.8 | 1241.6 | 1240.6 | 11 |
| 6  | 766.3  | 383.7 | 749.3  | 748.3  | Y    | 1187.6 | 594.3 | 1170.6 | 1169.6 | 10 |
| 7  | 879.4  | 440.2 | 862.3  | 861.4  | I    | 1024.5 | 512.8 | 1007.5 | 1006.5 | 9  |
| 8  | 993.4  | 497.2 | 976.4  | 975.4  | N    | 911.5  | 456.2 | 894.4  | 893.5  | 8  |
| 9  | 1108.4 | 554.7 | 1091.4 | 1090.4 | D    | 797.4  | 399.2 | 780.4  | 779.4  | 7  |
| 10 | 1195.5 | 598.2 | 1178.4 | 1177.5 | S    | 682.4  | 341.7 | 665.4  | 664.4  | 6  |
| 11 | 1308.5 | 654.8 | 1291.5 | 1290.5 | I    | 595.4  | 298.2 | 578.3  |        | 5  |
| 12 | 1365.6 | 683.3 | 1348.5 | 1347.6 | G    | 482.3  | 241.7 | 465.3  |        | 4  |
| 13 | 1478.7 | 739.8 | 1461.6 | 1460.7 | L    | 425.3  | 213.1 | 408.2  |        | 3  |
| 14 | 1615.7 | 808.4 | 1598.7 | 1597.7 | H    | 312.2  | 156.6 | 295.2  |        | 2  |
| 15 | 1789.8 | 895.4 | 1772.8 | 1771.8 | R    | 175.1  |       | 158.1  |        | 1  |

Gene symbol: Chchd2

Protein name: Coiled-coil-helix-coiled-coil-helix domain-containing protein 2

Protein accession numbers: IPI00284925,IPI00407413

Peptide sequence: (K)LCEGFNEVLR(Q)

Exclusive (unique to this protein): TRUE

SEQUEST XCorr score: 2.02 SEQUEST DCn score: 0.428

Fix modifications: C2: Carbamidomethyl (+57.02)Variable modifications: None

charge: 2

Observed m/z: 618.8061

Actual minus calculated peptide mass (AMU): -0.0004883

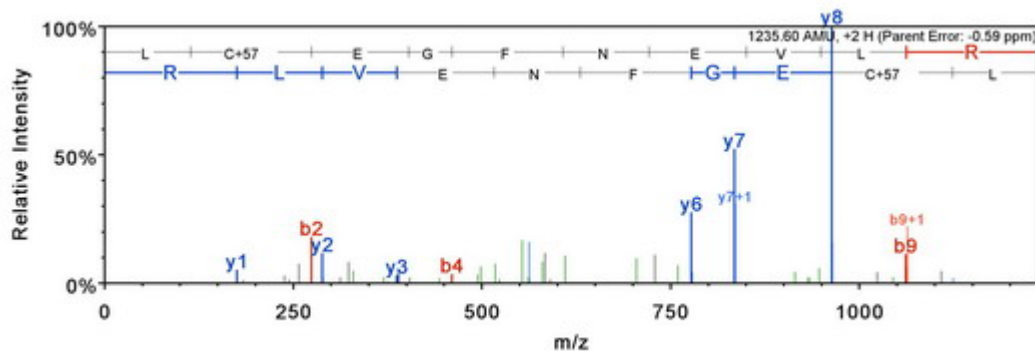

| B  | B ions | B+2H  | B-NH3  | B-H2O  | A,A  | Y ions | Y+2H  | Y-NH3  | Y-H2O  | Y  |
|----|--------|-------|--------|--------|------|--------|-------|--------|--------|----|
| 1  | 114.1  |       |        |        | L    | 1236.6 | 618.8 | 1219.6 | 1218.6 | 10 |
| 2  | 274.1  |       |        |        | C+57 | 1123.5 | 562.3 | 1106.5 | 1105.5 | 9  |
| 3  | 403.2  |       |        | 385.2  | E    | 963.5  | 482.3 | 946.5  | 945.5  | 8  |
| 4  | 460.2  |       |        | 442.2  | G    | 834.5  | 417.7 | 817.4  | 816.4  | 7  |
| 5  | 607.3  |       |        | 589.2  | F    | 777.4  | 389.2 | 760.4  | 759.4  | 6  |
| 6  | 721.3  | 361.2 | 704.3  | 703.3  | N    | 630.4  |       | 613.3  | 612.4  | 5  |
| 7  | 850.3  | 425.7 | 833.3  | 832.3  | E    | 516.3  |       | 499.3  | 498.3  | 4  |
| 8  | 949.4  | 475.2 | 932.4  | 931.4  | V    | 387.3  |       | 370.3  |        | 3  |
| 9  | 1062.5 | 531.8 | 1045.5 | 1044.5 | L    | 288.2  |       | 271.2  |        | 2  |
| 10 | 1236.6 | 618.8 | 1219.6 | 1218.6 | R    | 175.1  |       | 158.1  |        | 1  |

Gene symbol: Chchd6

Protein name: Coiled-coil-helix-coiled-coil-helix domain-containing protein 6

Protein accession numbers: IPI00313390

Peptide sequence: (R)RVEPVCSGLQAQLR(C)

Exclusive (unique to this protein): TRUE

SEQUEST XCorr score: 2.24 SEQUEST DCn score: 0.467

Fix modifications: C6: Carbamidomethyl (+57.02) Variable modifications: None

charge: 2

Observed m/z: 863.4779

Actual minus calculated peptide mass (AMU): 0.004395

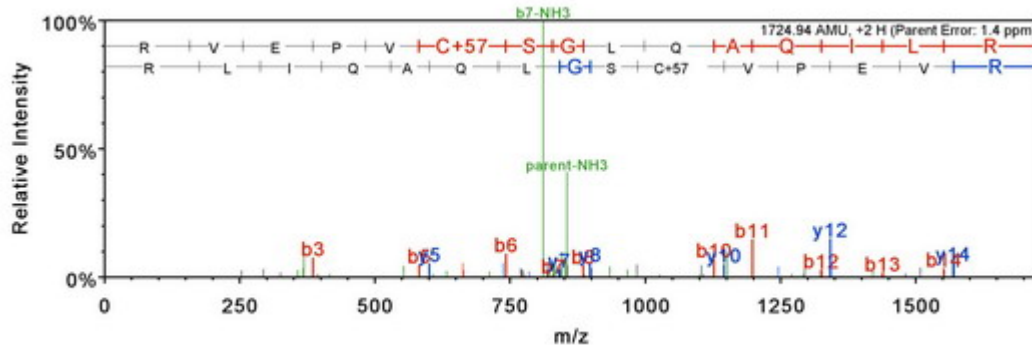

| B  | B ions | B+2H  | B-NH3  | B-H2O  | A,A  | Y ions | Y+2H  | Y-NH3  | Y-H2O  | Y  |
|----|--------|-------|--------|--------|------|--------|-------|--------|--------|----|
| 1  | 157.1  | 79.1  | 140.1  |        | R    | 1725.9 | 863.5 | 1708.9 | 1707.9 | 15 |
| 2  | 256.2  | 128.6 | 239.2  |        | V    | 1569.8 | 785.4 | 1552.8 | 1551.8 | 14 |
| 3  | 385.2  | 193.1 | 368.2  | 367.2  | E    | 1470.8 | 735.9 | 1453.8 | 1452.8 | 13 |
| 4  | 482.3  | 241.6 | 465.3  | 464.3  | P    | 1341.7 | 671.4 | 1324.7 | 1323.7 | 12 |
| 5  | 581.3  | 291.2 | 564.3  | 563.3  | V    | 1244.7 | 622.8 | 1227.7 | 1226.7 | 11 |
| 6  | 741.4  | 371.2 | 724.4  | 723.4  | C+57 | 1145.6 | 573.3 | 1128.6 | 1127.6 | 10 |
| 7  | 828.4  | 414.7 | 811.4  | 810.4  | S    | 985.6  | 493.3 | 968.6  | 967.6  | 9  |
| 8  | 885.4  | 443.2 | 868.4  | 867.4  | G    | 898.6  | 449.8 | 881.5  |        | 8  |
| 9  | 998.5  | 499.8 | 981.5  | 980.5  | L    | 841.5  | 421.3 | 824.5  |        | 7  |
| 10 | 1126.6 | 563.8 | 1109.5 | 1108.6 | Q    | 728.4  | 364.7 | 711.4  |        | 6  |
| 11 | 1197.6 | 599.3 | 1180.6 | 1179.6 | A    | 600.4  |       | 583.4  |        | 5  |
| 12 | 1325.7 | 663.3 | 1308.6 | 1307.7 | Q    | 529.4  |       | 512.3  |        | 4  |
| 13 | 1438.8 | 719.9 | 1421.7 | 1420.7 | I    | 401.3  |       | 384.3  |        | 3  |
| 14 | 1551.8 | 776.4 | 1534.8 | 1533.8 | L    | 288.2  |       | 271.2  |        | 2  |
| 15 | 1725.9 | 863.5 | 1708.9 | 1707.9 | R    | 175.1  |       | 158.1  |        | 1  |

Gene symbol: Chmp5

Protein name: Charged multivesicular body protein 5

Protein accession numbers: IPI00110729

Peptide sequence: (K)APPSLTDCIGTVDSR(A)

Exclusive (unique to this protein): TRUE

SEQUEST XCorr score: 2.11 SEQUEST DCn score: 0.604

Fix modifications: C9: Carbamidomethyl (+57.02) Variable modifications: None

charge: 2 Observed m/z: 843.4141

Actual minus calculated peptide mass (AMU): 0.003296

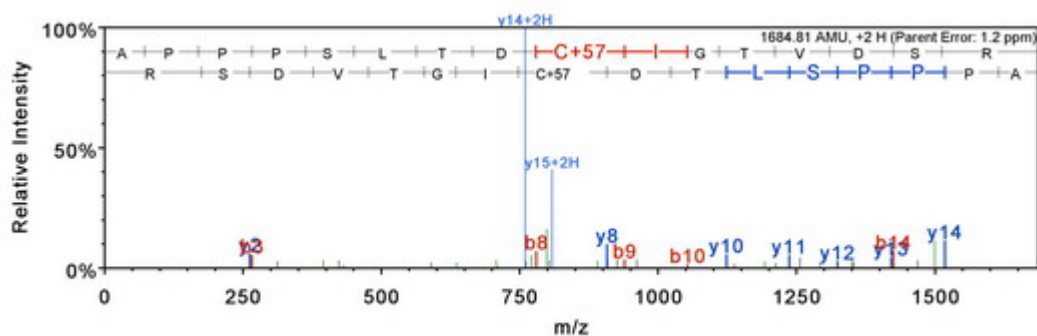

| B  | B ions | B+2H  | B-NH3  | B-H2O  | AA   | Y ions | Y+2H  | Y-NH3  | Y-H2O  | Y  |
|----|--------|-------|--------|--------|------|--------|-------|--------|--------|----|
| 1  | 72.0   |       |        |        | A    | 1685.8 | 843.4 | 1668.8 | 1667.8 | 16 |
| 2  | 169.1  |       |        |        | P    | 1614.8 | 807.9 | 1597.8 | 1596.8 | 15 |
| 3  | 266.1  |       |        |        | P    | 1517.7 | 759.4 | 1500.7 | 1499.7 | 14 |
| 4  | 363.2  |       |        |        | P    | 1420.7 | 710.8 | 1403.7 | 1402.7 | 13 |
| 5  | 450.2  |       |        | 432.2  | S    | 1323.6 | 662.3 | 1306.6 | 1305.6 | 12 |
| 6  | 563.3  | 282.2 |        | 545.3  | L    | 1236.6 | 618.8 | 1219.6 | 1218.6 | 11 |
| 7  | 664.4  | 332.7 |        | 646.4  | T    | 1123.5 | 562.3 | 1106.5 | 1105.5 | 10 |
| 8  | 779.4  | 390.2 |        | 761.4  | D    | 1022.5 | 511.7 | 1005.4 | 1004.5 | 9  |
| 9  | 939.4  | 470.2 |        | 921.4  | C+57 | 907.4  | 454.2 | 890.4  | 889.4  | 8  |
| 10 | 1052.5 | 526.8 |        | 1034.5 | I    | 747.4  | 374.2 | 730.4  | 729.4  | 7  |
| 11 | 1109.5 | 555.3 |        | 1091.5 | G    | 634.3  | 317.7 | 617.3  | 616.3  | 6  |
| 12 | 1210.6 | 605.8 |        | 1192.6 | T    | 577.3  |       | 560.3  | 559.3  | 5  |
| 13 | 1309.7 | 655.3 |        | 1291.6 | V    | 476.3  |       | 459.2  | 458.2  | 4  |
| 14 | 1424.7 | 712.8 |        | 1406.7 | D    | 377.2  |       | 360.2  | 359.2  | 3  |
| 15 | 1511.7 | 756.4 |        | 1493.7 | S    | 262.1  |       | 245.1  | 244.1  | 2  |
| 16 | 1685.8 | 843.4 | 1668.8 | 1667.8 | R    | 175.1  |       | 158.1  |        | 1  |

Gene symbol: Chordc1

Protein name: 18-day embryo whole body cDNA, RIKEN full-length enriched library, clone:1110001O09 product:cysteine and histidine-rich domain

Protein accession numbers: IPI00134017

Peptide sequence: (K)TSDFNFTFLAQEGCTR(G)

Exclusive (unique to this protein): TRUE

SEQUEST XCorr score: 2.18 SEQUEST DCn score: 0.675

Fix modifications: C13: Carbamidomethyl (+57.02) Variable modifications: None

charge: 2 Observed m/z: 873.8902

Actual minus calculated peptide mass (AMU): -0.003296

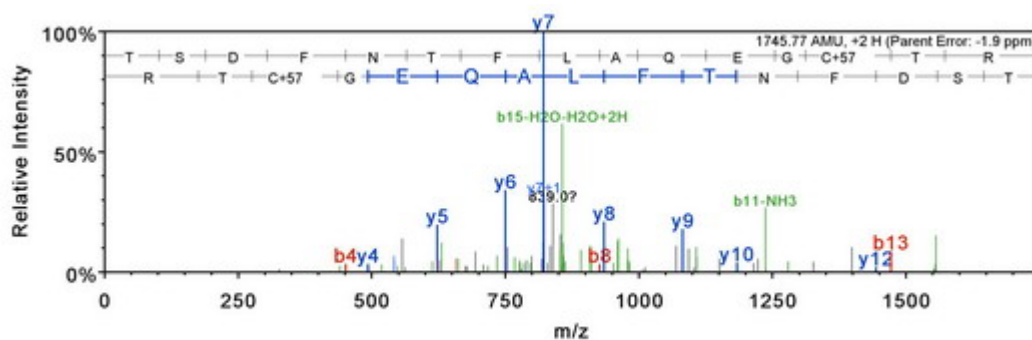

| B  | B Ions | B+2H  | B-NH3  | B-H2O  | AA   | Y Ions | Y+2H  | Y-NH3  | Y-H2O  | Y  |
|----|--------|-------|--------|--------|------|--------|-------|--------|--------|----|
| 1  | 102.1  |       |        | 84.0   | T    | 1746.8 | 873.9 | 1729.8 | 1728.8 | 15 |
| 2  | 189.1  |       |        | 171.1  | S    | 1645.7 | 823.4 | 1628.7 | 1627.7 | 14 |
| 3  | 304.1  |       |        | 286.1  | D    | 1558.7 | 779.9 | 1541.7 | 1540.7 | 13 |
| 4  | 451.2  |       |        | 433.2  | F    | 1443.7 | 722.3 | 1426.6 | 1425.7 | 12 |
| 5  | 565.2  |       | 548.2  | 547.2  | N    | 1296.6 | 648.8 | 1279.6 | 1278.6 | 11 |
| 6  | 666.3  | 333.6 | 649.3  | 648.3  | T    | 1182.6 | 591.8 | 1165.5 | 1164.5 | 10 |
| 7  | 813.3  | 407.2 | 796.3  | 795.3  | F    | 1081.5 | 541.3 | 1064.5 | 1063.5 | 9  |
| 8  | 926.4  | 463.7 | 909.4  | 908.4  | L    | 934.4  | 467.7 | 917.4  | 916.4  | 8  |
| 9  | 997.5  | 499.2 | 980.4  | 979.5  | A    | 821.4  | 411.2 | 804.3  | 803.4  | 7  |
| 10 | 1125.5 | 563.3 | 1108.5 | 1107.5 | Q    | 750.3  | 375.7 | 733.3  | 732.3  | 6  |
| 11 | 1254.6 | 627.8 | 1237.5 | 1236.5 | E    | 622.3  |       | 605.2  | 604.3  | 5  |
| 12 | 1311.6 | 656.3 | 1294.6 | 1293.6 | G    | 493.2  |       | 476.2  | 475.2  | 4  |
| 13 | 1471.6 | 736.3 | 1454.6 | 1453.6 | C+57 | 436.2  |       | 419.2  | 418.2  | 3  |
| 14 | 1572.7 | 786.8 | 1555.6 | 1554.7 | T    | 276.2  |       | 259.1  | 258.2  | 2  |
| 15 | 1746.8 | 873.9 | 1729.8 | 1728.8 | R    | 175.1  |       | 158.1  |        | 1  |

Gene symbol: Ckap5

Protein name: Cytoskeleton associated protein 5

Protein accession numbers: IPI00317134,IPI00337930

Peptide sequence: (R)DAAFEALGTALK(V)

Exclusive (unique to this protein): TRUE

SEQUEST XCorr score: 2.21 SEQUEST DCn score: 0.622

Fix modifications: None

Variable modifications: None

charge: 2

Observed m/z: 603.8196

Actual minus calculated peptide mass (AMU): -0.005859

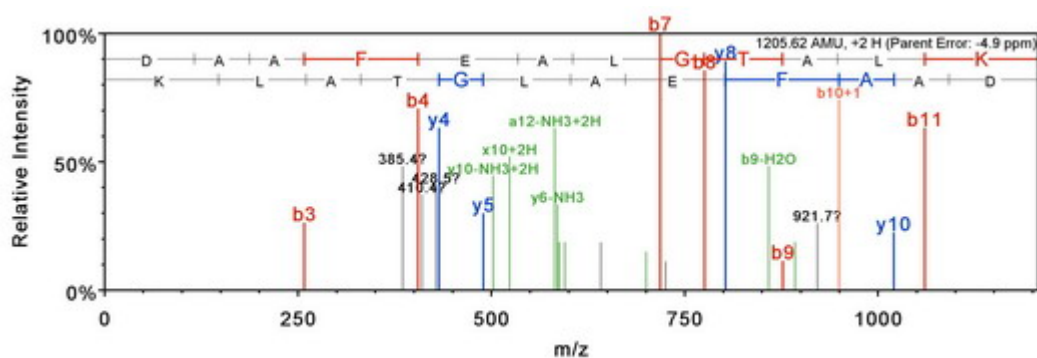

| B  | B Ions | B+2H  | B-NH3  | B-H2O  | AA | Y Ions | Y+2H  | Y-NH3  | Y-H2O  | Y  |
|----|--------|-------|--------|--------|----|--------|-------|--------|--------|----|
| 1  | 116.0  |       |        | 98.0   | D  | 1206.6 | 603.8 | 1189.6 | 1188.6 | 12 |
| 2  | 187.1  |       |        | 169.1  | A  | 1091.6 | 546.3 | 1074.6 | 1073.6 | 11 |
| 3  | 258.1  |       |        | 240.1  | A  | 1020.6 | 510.8 | 1003.6 | 1002.6 | 10 |
| 4  | 405.2  |       |        | 387.2  | F  | 949.5  | 475.3 | 932.5  | 931.5  | 9  |
| 5  | 534.2  |       |        | 516.2  | E  | 802.5  | 401.7 | 785.4  | 784.5  | 8  |
| 6  | 605.3  | 303.1 |        | 587.3  | A  | 673.4  | 337.2 | 656.4  | 655.4  | 7  |
| 7  | 718.3  | 359.7 |        | 700.3  | L  | 602.4  | 301.7 | 585.4  | 584.4  | 6  |
| 8  | 775.4  | 388.2 |        | 757.4  | G  | 489.3  |       | 472.3  | 471.3  | 5  |
| 9  | 876.4  | 438.7 |        | 858.4  | T  | 432.3  |       | 415.3  | 414.3  | 4  |
| 10 | 947.5  | 474.2 |        | 929.4  | A  | 331.2  |       | 314.2  |        | 3  |
| 11 | 1060.5 | 530.8 |        | 1042.5 | L  | 260.2  |       | 243.2  |        | 2  |
| 12 | 1206.6 | 603.8 | 1189.6 | 1188.6 | K  | 147.1  |       | 130.1  |        | 1  |

Gene symbol: Clta

Protein name: clathrin, light polypeptide (Lca) isoform d

Protein accession numbers: IPI00648658,IPI00828932

Peptide sequence: (R)AAEEAFVNDIDESSPGTEWER(V)

Exclusive (unique to this protein): TRUE

SEQUEST XCorr score: 3.64 SEQUEST DCn score: 0.663

Fix modifications: None

Variable modifications: None

charge: 2

Observed m/z: 1176.5206

Actual minus calculated peptide mass (AMU): 0.006592

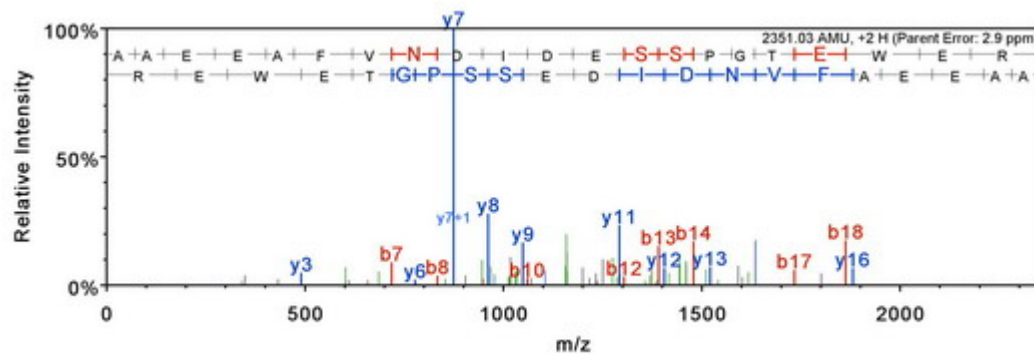

| B  | B Ions | B+2H   | B-NH3  | B-H2O  | AA | Y Ions | Y+2H   | Y-NH3  | Y-H2O  | Y  |
|----|--------|--------|--------|--------|----|--------|--------|--------|--------|----|
| 1  | 72.0   |        |        |        | A  | 2352.0 | 1176.5 | 2335.0 | 2334.0 | 21 |
| 2  | 143.1  |        |        |        | A  | 2281.0 | 1141.0 | 2264.0 | 2263.0 | 20 |
| 3  | 272.1  |        |        | 254.1  | E  | 2210.0 | 1105.5 | 2192.9 | 2191.9 | 19 |
| 4  | 401.2  |        |        | 383.2  | E  | 2080.9 | 1041.0 | 2063.9 | 2062.9 | 18 |
| 5  | 472.2  |        |        | 454.2  | A  | 1951.9 | 976.4  | 1934.8 | 1933.9 | 17 |
| 6  | 619.3  | 310.1  |        | 601.3  | F  | 1880.8 | 940.9  | 1863.8 | 1862.8 | 16 |
| 7  | 718.3  | 359.7  |        | 700.3  | V  | 1733.8 | 867.4  | 1716.7 | 1715.8 | 15 |
| 8  | 832.4  | 416.7  | 815.4  | 814.4  | N  | 1634.7 | 817.9  | 1617.7 | 1616.7 | 14 |
| 9  | 947.4  | 474.2  | 930.4  | 929.4  | D  | 1520.7 | 760.8  | 1503.6 | 1502.6 | 13 |
| 10 | 1060.5 | 530.8  | 1043.5 | 1042.5 | I  | 1405.6 | 703.3  | 1388.6 | 1387.6 | 12 |
| 11 | 1175.5 | 588.3  | 1158.5 | 1157.5 | D  | 1292.5 | 646.8  | 1275.5 | 1274.5 | 11 |
| 12 | 1304.6 | 652.8  | 1287.5 | 1286.5 | E  | 1177.5 | 589.3  | 1160.5 | 1159.5 | 10 |
| 13 | 1391.6 | 696.3  | 1374.6 | 1373.6 | S  | 1048.5 | 524.7  | 1031.4 | 1030.5 | 9  |
| 14 | 1478.6 | 739.8  | 1461.6 | 1460.6 | S  | 961.4  | 481.2  | 944.4  | 943.4  | 8  |
| 15 | 1575.7 | 788.3  | 1558.7 | 1557.7 | P  | 874.4  | 437.7  | 857.4  | 856.4  | 7  |
| 16 | 1632.7 | 816.9  | 1615.7 | 1614.7 | G  | 777.4  | 389.2  | 760.3  | 759.3  | 6  |
| 17 | 1733.8 | 867.4  | 1716.7 | 1715.7 | T  | 720.3  |        | 703.3  | 702.3  | 5  |
| 18 | 1862.8 | 931.9  | 1845.8 | 1844.8 | E  | 619.3  |        | 602.3  | 601.3  | 4  |
| 19 | 2048.9 | 1024.9 | 2031.9 | 2030.9 | W  | 490.2  |        | 473.2  | 472.2  | 3  |
| 20 | 2177.9 | 1089.5 | 2160.9 | 2159.9 | E  | 304.2  |        | 287.1  | 286.2  | 2  |
| 21 | 2352.0 | 1176.5 | 2335.0 | 2334.0 | R  | 175.1  |        | 158.1  |        | 1  |

Gene symbol: Cnbp

Protein name: Isoform 2 of Cellular nucleic acid-binding protein

Protein accession numbers: IPI00137229,IPI00330767,IPI00454151

Peptide sequence: (R)GFQFVSSSLPDICYR(C)

Exclusive (unique to this protein): TRUE

SEQUEST XCorr score: 2.01 SEQUEST DCn score: 0.584

Fix modifications: C13: Carbamidomethyl (+57.02) Variable modifications: None

charge: 2

Observed m/z: 888.4268

Actual minus calculated peptide mass (AMU): 0.003052

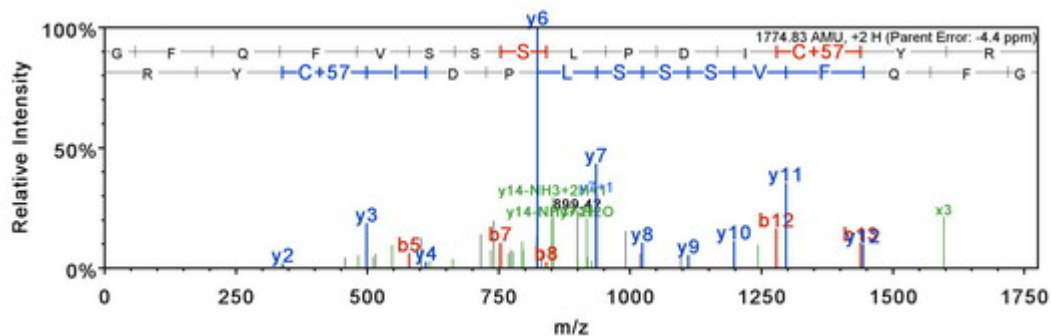

| B  | B Ions | B+2H  | B-NH3  | B-H2O  | AA   | Y Ions | Y+2H  | Y-NH3  | Y-H2O  | Y  |
|----|--------|-------|--------|--------|------|--------|-------|--------|--------|----|
| 1  | 58.0   |       |        |        | G    | 1775.8 | 888.4 | 1758.8 | 1757.8 | 15 |
| 2  | 205.1  |       |        |        | F    | 1718.8 | 859.9 | 1701.8 | 1700.8 | 14 |
| 3  | 333.2  |       | 316.1  |        | Q    | 1571.8 | 786.4 | 1554.7 | 1553.7 | 13 |
| 4  | 480.2  |       | 463.2  |        | F    | 1443.7 | 722.4 | 1426.7 | 1425.7 | 12 |
| 5  | 579.3  |       | 562.3  |        | V    | 1296.6 | 648.8 | 1279.6 | 1278.6 | 11 |
| 6  | 666.3  | 333.7 | 649.3  | 648.3  | S    | 1197.6 | 599.3 | 1180.5 | 1179.5 | 10 |
| 7  | 753.4  | 377.2 | 736.3  | 735.4  | S    | 1110.5 | 555.8 | 1093.5 | 1092.5 | 9  |
| 8  | 840.4  | 420.7 | 823.4  | 822.4  | S    | 1023.5 | 512.3 | 1006.5 | 1005.5 | 8  |
| 9  | 953.5  | 477.2 | 936.5  | 935.5  | L    | 936.5  | 468.7 | 919.4  | 918.5  | 7  |
| 10 | 1050.5 | 525.8 | 1033.5 | 1032.5 | P    | 823.4  | 412.2 | 806.4  | 805.4  | 6  |
| 11 | 1165.5 | 583.3 | 1148.5 | 1147.5 | D    | 726.3  |       | 709.3  | 708.3  | 5  |
| 12 | 1278.6 | 639.8 | 1261.6 | 1260.6 | I    | 611.3  |       | 594.3  |        | 4  |
| 13 | 1438.7 | 719.8 | 1421.6 | 1420.7 | C+57 | 498.2  |       | 481.2  |        | 3  |
| 14 | 1601.7 | 801.4 | 1584.7 | 1583.7 | Y    | 338.2  |       | 321.2  |        | 2  |
| 15 | 1775.8 | 888.4 | 1758.8 | 1757.8 | R    | 175.1  |       | 158.1  |        | 1  |

Gene symbol: Cops2

Protein name: Isoform 1 of COP9 signalosome complex subunit 2

Protein accession numbers: IPI00120513,IPI00480307,IPI00756831

Peptide sequence: (R)IDQVNQLLELDHQK(R)

Exclusive (unique to this protein): TRUE

SEQUEST XCorr score: 2.06 SEQUEST DCn score: 0.465

Fix modifications: None

Variable modifications: None

charge: 2 Observed m/z: 846.9481

Actual minus calculated peptide mass (AMU): -0.0039054

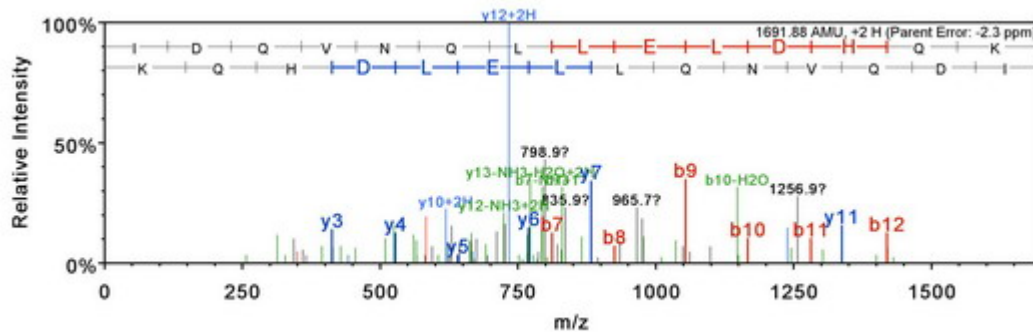

| B  | B Ions | B+2H  | B-NH3  | B-H2O  | AA | Y Ions | Y+2H  | Y-NH3  | Y-H2O  | Y  |
|----|--------|-------|--------|--------|----|--------|-------|--------|--------|----|
| 1  | 114.1  |       |        |        | I  | 1692.9 | 847.0 | 1675.9 | 1674.9 | 14 |
| 2  | 229.1  |       |        | 211.1  | D  | 1579.8 | 790.4 | 1562.8 | 1561.8 | 13 |
| 3  | 357.2  |       | 340.2  | 339.2  | Q  | 1464.8 | 732.9 | 1447.8 | 1446.8 | 12 |
| 4  | 456.3  |       | 439.2  | 438.2  | V  | 1336.7 | 668.9 | 1319.7 | 1318.7 | 11 |
| 5  | 570.3  |       | 553.3  | 552.3  | N  | 1237.7 | 619.3 | 1220.6 | 1219.6 | 10 |
| 6  | 698.4  | 349.7 | 681.3  | 680.3  | Q  | 1123.6 | 562.3 | 1106.6 | 1105.6 | 9  |
| 7  | 811.4  | 406.2 | 794.4  | 793.4  | L  | 995.6  | 498.3 | 978.5  | 977.5  | 8  |
| 8  | 924.5  | 462.8 | 907.5  | 906.5  | L  | 882.5  | 441.7 | 865.4  | 864.5  | 7  |
| 9  | 1053.6 | 527.3 | 1036.5 | 1035.5 | E  | 769.4  | 385.2 | 752.4  | 751.4  | 6  |
| 10 | 1166.6 | 583.8 | 1149.6 | 1148.6 | L  | 640.3  | 320.7 | 623.3  | 622.3  | 5  |
| 11 | 1281.7 | 641.3 | 1264.6 | 1263.7 | D  | 527.3  | 264.1 | 510.2  | 509.3  | 4  |
| 12 | 1418.7 | 709.9 | 1401.7 | 1400.7 | H  | 412.2  | 206.6 | 395.2  |        | 3  |
| 13 | 1546.8 | 773.9 | 1529.8 | 1528.8 | Q  | 275.2  |       | 258.1  |        | 2  |
| 14 | 1692.9 | 847.0 | 1675.9 | 1674.9 | K  | 147.1  |       | 130.1  |        | 1  |

Gene symbol: Cops3

Protein name: COP9 signalosome complex subunit 3

Protein accession numbers: IPI00131870,IPI00650021

Peptide sequence: (R)YATDTFAGLCHQLTNALVER(K)

Exclusive (unique to this protein): TRUE

SEQUEST XCorr score: 2.03 SEQUEST DCn score: 0.648

Fix modifications: C10: Carbamidomethyl (+57.02)Variable modifications: None

charge: 2

Observed m/z: 1140.556

Actual minus calculated peptide mass (AMU): -0.00415

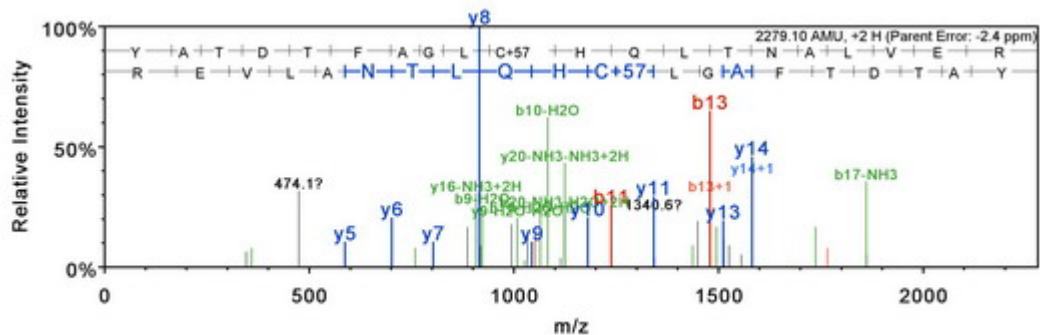



| B  | B Ions | B+2H   | B-NH3  | B-H2O  | AA   | Y Ions | Y+2H   | Y-NH3  | Y-H2O  | Y  |
|----|--------|--------|--------|--------|------|--------|--------|--------|--------|----|
| 1  | 164.1  |        |        |        | Y    | 2280.1 | 1140.6 | 2263.1 | 2262.1 | 20 |
| 2  | 235.1  |        |        |        | A    | 2117.0 | 1059.0 | 2100.0 | 2099.0 | 19 |
| 3  | 336.2  |        |        | 318.2  | T    | 2046.0 | 1023.5 | 2029.0 | 2028.0 | 18 |
| 4  | 451.2  |        |        | 433.2  | D    | 1945.0 | 973.0  | 1927.9 | 1927.0 | 17 |
| 5  | 552.2  |        |        | 534.2  | T    | 1829.9 | 915.5  | 1812.9 | 1811.9 | 16 |
| 6  | 699.3  | 350.2  |        | 681.3  | F    | 1728.9 | 865.0  | 1711.9 | 1710.9 | 15 |
| 7  | 770.3  | 385.7  |        | 752.3  | A    | 1581.8 | 791.4  | 1564.8 | 1563.8 | 14 |
| 8  | 827.4  | 414.2  |        | 809.4  | G    | 1510.8 | 755.9  | 1493.8 | 1492.8 | 13 |
| 9  | 940.4  | 470.7  |        | 922.4  | L    | 1453.8 | 727.4  | 1436.7 | 1435.8 | 12 |
| 10 | 1100.5 | 550.7  |        | 1082.5 | C+57 | 1340.7 | 670.8  | 1323.7 | 1322.7 | 11 |
| 11 | 1237.5 | 619.3  |        | 1219.5 | H    | 1180.6 | 590.8  | 1163.6 | 1162.6 | 10 |
| 12 | 1365.6 | 683.3  | 1348.6 | 1347.6 | Q    | 1043.6 | 522.3  | 1026.6 | 1025.6 | 9  |
| 13 | 1478.7 | 739.8  | 1461.7 | 1460.7 | L    | 915.5  | 458.3  | 898.5  | 897.5  | 8  |
| 14 | 1579.7 | 790.4  | 1562.7 | 1561.7 | T    | 802.4  | 401.7  | 785.4  | 784.4  | 7  |
| 15 | 1693.8 | 847.4  | 1676.7 | 1675.8 | N    | 701.4  | 351.2  | 684.4  | 683.4  | 6  |
| 16 | 1764.8 | 882.9  | 1747.8 | 1746.8 | A    | 587.4  |        | 570.3  | 569.3  | 5  |
| 17 | 1877.9 | 939.5  | 1860.9 | 1859.9 | L    | 516.3  |        | 499.3  | 498.3  | 4  |
| 18 | 1977.0 | 989.0  | 1959.9 | 1958.9 | V    | 403.2  |        | 386.2  | 385.2  | 3  |
| 19 | 2106.0 | 1053.5 | 2089.0 | 2088.0 | E    | 304.2  |        | 287.1  | 286.2  | 2  |
| 20 | 2280.1 | 1140.6 | 2263.1 | 2262.1 | R    | 175.1  |        | 158.1  |        | 1  |

Gene symbol: Cops5

Protein name: COP9 signalosome complex subunit 5

Protein accession numbers: IPI00135087

Peptide sequence: (K)GYKPPDEGPSEYQTIPLNK(I)

Exclusive (unique to this protein): TRUE

SEQUEST XCorr score: 2.01 SEQUEST DCn score: 0.601

Fix modifications: None

Variable modifications: None

charge: 2

Observed m/z: 1067.0266

Actual minus calculated peptide mass (AMU): -0.005371

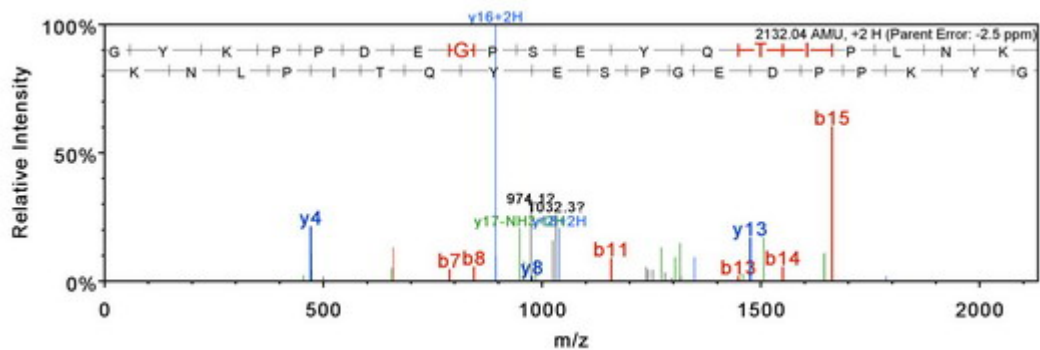

| B  | B Ions | B+2H   | B-NH3  | B-H2O  | AA | Y Ions | Y+2H   | Y-NH3  | Y-H2O  | Y  |
|----|--------|--------|--------|--------|----|--------|--------|--------|--------|----|
| 1  | 58.0   |        |        |        | G  | 2133.1 | 1067.0 | 2116.0 | 2115.0 | 19 |
| 2  | 221.1  |        |        |        | Y  | 2076.0 | 1038.5 | 2059.0 | 2058.0 | 18 |
| 3  | 349.2  | 175.1  | 332.2  |        | K  | 1913.0 | 957.0  | 1895.9 | 1895.0 | 17 |
| 4  | 446.2  | 223.6  | 429.2  |        | P  | 1784.9 | 892.9  | 1767.8 | 1766.9 | 16 |
| 5  | 543.3  | 272.1  | 526.3  |        | P  | 1687.8 | 844.4  | 1670.8 | 1669.8 | 15 |
| 6  | 658.3  | 329.7  | 641.3  | 640.3  | D  | 1590.8 | 795.9  | 1573.7 | 1572.8 | 14 |
| 7  | 787.4  | 394.2  | 770.3  | 769.4  | E  | 1475.7 | 738.4  | 1458.7 | 1457.7 | 13 |
| 8  | 844.4  | 422.7  | 827.4  | 826.4  | G  | 1346.7 | 673.9  | 1329.7 | 1328.7 | 12 |
| 9  | 941.4  | 471.2  | 924.4  | 923.4  | P  | 1289.7 | 645.3  | 1272.7 | 1271.7 | 11 |
| 10 | 1028.5 | 514.7  | 1011.4 | 1010.5 | S  | 1192.6 | 596.8  | 1175.6 | 1174.6 | 10 |
| 11 | 1157.5 | 579.3  | 1140.5 | 1139.5 | E  | 1105.6 | 553.3  | 1088.6 | 1087.6 | 9  |
| 12 | 1320.6 | 660.8  | 1303.5 | 1302.6 | Y  | 976.6  | 488.8  | 959.5  | 958.5  | 8  |
| 13 | 1448.6 | 724.8  | 1431.6 | 1430.6 | Q  | 813.5  | 407.3  | 796.5  | 795.5  | 7  |
| 14 | 1549.7 | 775.3  | 1532.7 | 1531.7 | T  | 685.4  | 343.2  | 668.4  | 667.4  | 6  |
| 15 | 1662.8 | 831.9  | 1645.7 | 1644.8 | I  | 584.4  |        | 567.4  |        | 5  |
| 16 | 1759.8 | 880.4  | 1742.8 | 1741.8 | P  | 471.3  |        | 454.3  |        | 4  |
| 17 | 1872.9 | 937.0  | 1855.9 | 1854.9 | L  | 374.2  |        | 357.2  |        | 3  |
| 18 | 1987.0 | 994.0  | 1969.9 | 1968.9 | N  | 261.2  |        | 244.1  |        | 2  |
| 19 | 2133.1 | 1067.0 | 2116.0 | 2115.0 | K  | 147.1  |        | 130.1  |        | 1  |

Gene symbol: Cops6

Protein name: COP9 signalosome complex subunit 6

Protein accession numbers: IPI00131873,IPI00830393,IPI00830412

Peptide sequence: (K)ASEAGEVVPFNHEILR(E)

Exclusive (unique to this protein): TRUE

SEQUEST XCorr score: 2.13 SEQUEST DCn score: 0.604

Fix modifications: None

Variable modifications: None

charge: 2

Observed m/z: 834.9174

Actual minus calculated peptide mass (AMU): -0.007813

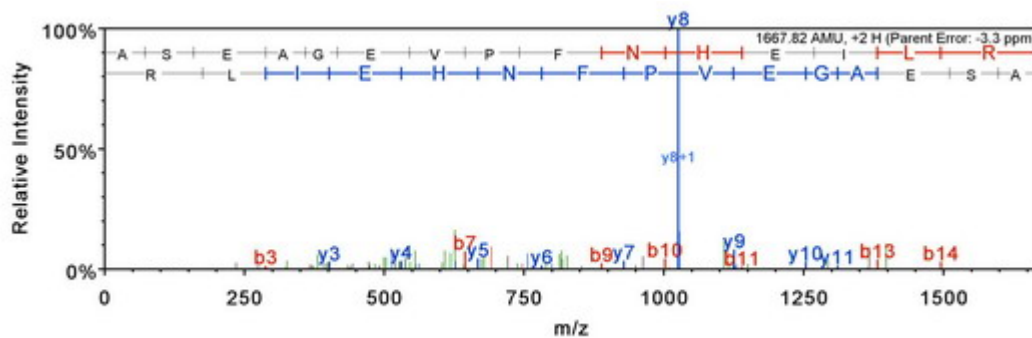

| B  | B Ions | B+2H  | B-NH3  | B-H2O  | AA | Y Ions | Y+2H  | Y-NH3  | Y-H2O  | Y  |
|----|--------|-------|--------|--------|----|--------|-------|--------|--------|----|
| 1  | 72.0   |       |        |        | A  | 1668.8 | 834.9 | 1651.8 | 1650.8 | 15 |
| 2  | 159.1  |       |        | 141.1  | S  | 1597.8 | 799.4 | 1580.8 | 1579.8 | 14 |
| 3  | 288.1  |       |        | 270.1  | E  | 1510.8 | 755.9 | 1493.7 | 1492.8 | 13 |
| 4  | 359.2  |       |        | 341.2  | A  | 1381.7 | 691.4 | 1364.7 | 1363.7 | 12 |
| 5  | 416.2  |       |        | 398.2  | G  | 1310.7 | 655.9 | 1293.7 | 1292.7 | 11 |
| 6  | 545.2  | 273.1 |        | 527.2  | E  | 1253.7 | 627.3 | 1236.6 | 1235.7 | 10 |
| 7  | 644.3  | 322.7 |        | 626.3  | V  | 1124.6 | 562.8 | 1107.6 | 1106.6 | 9  |
| 8  | 741.3  | 371.2 |        | 723.3  | P  | 1025.5 | 513.3 | 1008.5 | 1007.5 | 8  |
| 9  | 888.4  | 444.7 |        | 870.4  | F  | 928.5  | 464.8 | 911.5  | 910.5  | 7  |
| 10 | 1002.5 | 501.7 | 985.4  | 984.4  | N  | 781.4  | 391.2 | 764.4  | 763.4  | 6  |
| 11 | 1139.5 | 570.3 | 1122.5 | 1121.5 | H  | 667.4  | 334.2 | 650.4  | 649.4  | 5  |
| 12 | 1268.5 | 634.8 | 1251.5 | 1250.5 | E  | 530.3  |       | 513.3  | 512.3  | 4  |
| 13 | 1381.6 | 691.3 | 1364.6 | 1363.6 | I  | 401.3  |       | 384.3  |        | 3  |
| 14 | 1494.7 | 747.9 | 1477.7 | 1476.7 | L  | 288.2  |       | 271.2  |        | 2  |
| 15 | 1668.8 | 834.9 | 1651.8 | 1650.8 | R  | 175.1  |       | 158.1  |        | 1  |

Gene symbol: Copz1

Protein name: Coatomer subunit zeta-1

Protein accession numbers: IPI00139637,IPI00761970

Peptide sequence: (R)GEDVPLTEQTVSQVLQSAK(E)

Exclusive (unique to this protein): TRUE

SEQUEST XCorr score: 2.36 SEQUEST DCn score: 0.594

Fix modifications: None

Variable modifications: None

charge: 2

Observed m/z: 1015.0287

Actual minus calculated peptide mass (AMU): 0.00415

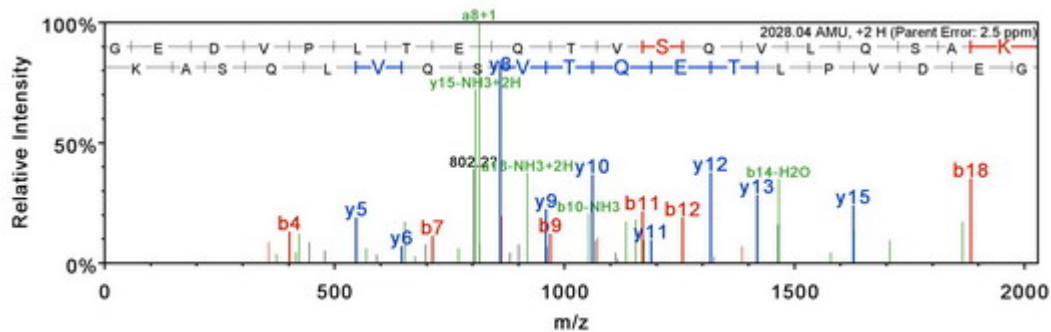

| B  | B Ions | B+2H   | B-NH3  | B-H2O  | AA | Y Ions | Y+2H   | Y-NH3  | Y-H2O  | Y  |
|----|--------|--------|--------|--------|----|--------|--------|--------|--------|----|
| 1  | 58.0   |        |        |        | G  | 2029.1 | 1015.0 | 2012.0 | 2011.0 | 19 |
| 2  | 187.1  |        |        | 169.1  | E  | 1972.0 | 986.5  | 1955.0 | 1954.0 | 18 |
| 3  | 302.1  |        |        | 284.1  | D  | 1843.0 | 922.0  | 1826.0 | 1825.0 | 17 |
| 4  | 401.2  |        |        | 383.2  | V  | 1728.0 | 864.5  | 1710.9 | 1709.9 | 16 |
| 5  | 498.2  |        |        | 480.2  | P  | 1628.9 | 815.0  | 1611.9 | 1610.9 | 15 |
| 6  | 611.3  | 306.2  |        | 593.3  | L  | 1531.8 | 766.4  | 1514.8 | 1513.8 | 14 |
| 7  | 712.4  | 356.7  |        | 694.3  | T  | 1418.8 | 709.9  | 1401.7 | 1400.7 | 13 |
| 8  | 841.4  | 421.2  |        | 823.4  | E  | 1317.7 | 659.4  | 1300.7 | 1299.7 | 12 |
| 9  | 969.5  | 485.2  | 952.4  | 951.4  | Q  | 1188.7 | 594.8  | 1171.6 | 1170.7 | 11 |
| 10 | 1070.5 | 535.8  | 1053.5 | 1052.5 | T  | 1060.6 | 530.8  | 1043.6 | 1042.6 | 10 |
| 11 | 1169.6 | 585.3  | 1152.5 | 1151.6 | V  | 959.6  | 480.3  | 942.5  | 941.5  | 9  |
| 12 | 1256.6 | 628.8  | 1239.6 | 1238.6 | S  | 860.5  | 430.8  | 843.5  | 842.5  | 8  |
| 13 | 1384.7 | 692.8  | 1367.6 | 1366.7 | Q  | 773.5  | 387.2  | 756.4  | 755.4  | 7  |
| 14 | 1483.7 | 742.4  | 1466.7 | 1465.7 | V  | 645.4  | 323.2  | 628.4  | 627.4  | 6  |
| 15 | 1596.8 | 798.9  | 1579.8 | 1578.8 | L  | 546.3  |        | 529.3  | 528.3  | 5  |
| 16 | 1724.9 | 862.9  | 1707.8 | 1706.9 | Q  | 433.2  |        | 416.2  | 415.2  | 4  |
| 17 | 1811.9 | 906.5  | 1794.9 | 1793.9 | S  | 305.2  |        | 288.2  | 287.2  | 3  |
| 18 | 1882.9 | 942.0  | 1865.9 | 1864.9 | A  | 218.2  |        | 201.1  |        | 2  |
| 19 | 2029.1 | 1015.0 | 2012.0 | 2011.0 | K  | 147.1  |        | 130.1  |        | 1  |

Gene symbol: Cpne8

Protein name: copine VIII isoform 2

Protein accession numbers: IPI00118969,IPI00120173,IPI00461579

Peptide sequence: (R)DTFSKSDPICVLYTQAVGNK(E)

Exclusive (unique to this protein): TRUE

SEQUEST XCorr score: 2.04 SEQUEST DCn score: 0.409

Fix modifications: C10: Carbamidomethyl (+57.02)Variable modifications: None

charge: 2

Observed m/z: 1122.0526

Actual minus calculated peptide mass (AMU): -0.004395

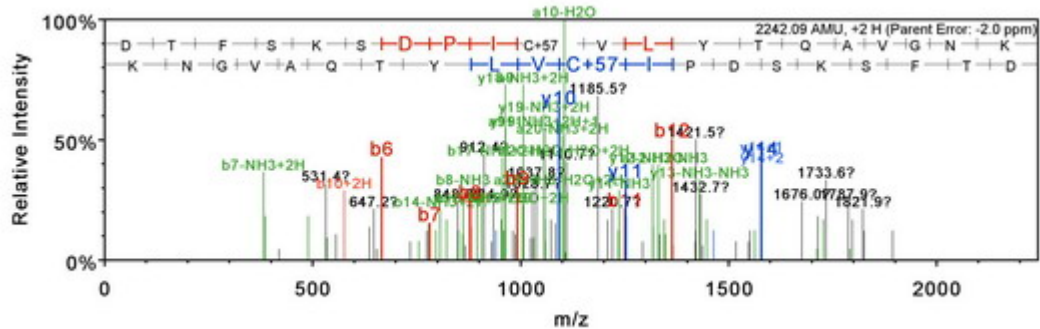

| B  | B Ions | B+2H   | B-NH3  | B-H2O  | AA   | Y Ions | Y+2H   | Y-NH3  | Y-H2O  | Y  |
|----|--------|--------|--------|--------|------|--------|--------|--------|--------|----|
| 1  | 116.0  |        |        | 98.0   | D    | 2243.1 | 1122.0 | 2226.1 | 2225.1 | 20 |
| 2  | 217.1  |        |        | 199.1  | T    | 2128.1 | 1064.5 | 2111.1 | 2110.1 | 19 |
| 3  | 364.2  |        |        | 346.1  | F    | 2027.0 | 1014.0 | 2010.0 | 2009.0 | 18 |
| 4  | 451.2  |        |        | 433.2  | S    | 1880.0 | 940.5  | 1862.9 | 1862.0 | 17 |
| 5  | 579.3  | 290.1  | 562.3  | 561.3  | K    | 1792.9 | 897.0  | 1775.9 | 1774.9 | 16 |
| 6  | 666.3  | 333.7  | 649.3  | 648.3  | S    | 1664.8 | 832.9  | 1647.8 | 1646.8 | 15 |
| 7  | 781.3  | 391.2  | 764.3  | 763.3  | D    | 1577.8 | 789.4  | 1560.8 | 1559.8 | 14 |
| 8  | 878.4  | 439.7  | 861.4  | 860.4  | P    | 1462.8 | 731.9  | 1445.8 | 1444.8 | 13 |
| 9  | 991.5  | 496.2  | 974.5  | 973.5  | I    | 1365.7 | 683.4  | 1348.7 | 1347.7 | 12 |
| 10 | 1151.5 | 576.3  | 1134.5 | 1133.5 | C+57 | 1252.6 | 626.8  | 1235.6 | 1234.6 | 11 |
| 11 | 1250.6 | 625.8  | 1233.5 | 1232.6 | V    | 1092.6 | 546.8  | 1075.6 | 1074.6 | 10 |
| 12 | 1363.7 | 682.3  | 1346.6 | 1345.7 | L    | 993.5  | 497.3  | 976.5  | 975.5  | 9  |
| 13 | 1526.7 | 763.9  | 1509.7 | 1508.7 | Y    | 880.5  | 440.7  | 863.4  | 862.4  | 8  |
| 14 | 1627.8 | 814.4  | 1610.7 | 1609.8 | T    | 717.4  | 359.2  | 700.4  | 699.4  | 7  |
| 15 | 1755.8 | 878.4  | 1738.8 | 1737.8 | Q    | 616.3  | 308.7  | 599.3  |        | 6  |
| 16 | 1826.9 | 913.9  | 1809.8 | 1808.9 | A    | 488.3  |        | 471.3  |        | 5  |
| 17 | 1925.9 | 963.5  | 1908.9 | 1907.9 | V    | 417.3  |        | 400.2  |        | 4  |
| 18 | 1983.0 | 992.0  | 1965.9 | 1964.9 | G    | 318.2  |        | 301.2  |        | 3  |
| 19 | 2097.0 | 1049.0 | 2080.0 | 2079.0 | N    | 261.2  |        | 244.1  |        | 2  |
| 20 | 2243.1 | 1122.0 | 2226.1 | 2225.1 | K    | 147.1  |        | 130.1  |        | 1  |

Gene symbol: Crym

Protein name: Mu-crystallin homolog

Protein accession numbers: IPI00120030

Peptide sequence: (R)APAFLSAEEVQDHLR(S)

Exclusive (unique to this protein): TRUE

SEQUEST XCorr score: 3.01 SEQUEST DCn score: 0.625

Fix modifications: None

Variable modifications: None

charge: 2

Observed m/z: 841.926

Actual minus calculated peptide mass (AMU): -0.006104

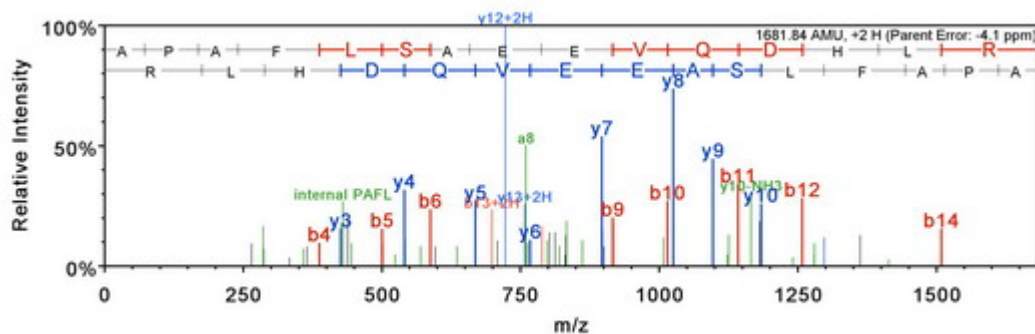

| B  | B Ions | B+2H  | B-NH3  | B-H2O  | AA | Y Ions | Y+2H  | Y-NH3  | Y-H2O  | Y  |
|----|--------|-------|--------|--------|----|--------|-------|--------|--------|----|
| 1  | 72.0   |       |        |        | A  | 1682.9 | 841.9 | 1665.8 | 1664.8 | 15 |
| 2  | 169.1  |       |        |        | P  | 1611.8 | 806.4 | 1594.8 | 1593.8 | 14 |
| 3  | 240.1  |       |        |        | A  | 1514.8 | 757.9 | 1497.7 | 1496.8 | 13 |
| 4  | 387.2  |       |        |        | F  | 1443.7 | 722.4 | 1426.7 | 1425.7 | 12 |
| 5  | 500.3  |       |        |        | L  | 1296.7 | 648.8 | 1279.6 | 1278.6 | 11 |
| 6  | 587.3  | 294.2 |        | 569.3  | S  | 1183.6 | 592.3 | 1166.5 | 1165.6 | 10 |
| 7  | 658.4  | 329.7 |        | 640.4  | A  | 1096.5 | 548.8 | 1079.5 | 1078.5 | 9  |
| 8  | 787.4  | 394.2 |        | 769.4  | E  | 1025.5 | 513.3 | 1008.5 | 1007.5 | 8  |
| 9  | 916.4  | 458.7 |        | 898.4  | E  | 896.5  | 448.7 | 879.4  | 878.5  | 7  |
| 10 | 1015.5 | 508.3 |        | 997.5  | V  | 767.4  | 384.2 | 750.4  | 749.4  | 6  |
| 11 | 1143.6 | 572.3 | 1126.5 | 1125.6 | Q  | 668.4  | 334.7 | 651.3  | 650.3  | 5  |
| 12 | 1258.6 | 629.8 | 1241.6 | 1240.6 | D  | 540.3  | 270.6 | 523.3  | 522.3  | 4  |
| 13 | 1395.7 | 698.3 | 1378.6 | 1377.6 | H  | 425.3  | 213.1 | 408.2  |        | 3  |
| 14 | 1508.7 | 754.9 | 1491.7 | 1490.7 | L  | 288.2  |       | 271.2  |        | 2  |
| 15 | 1682.9 | 841.9 | 1665.8 | 1664.8 | R  | 175.1  |       | 158.1  |        | 1  |

Gene symbol: Cse11

Protein name: Exportin-2

Protein accession numbers: IPI00112414

Peptide sequence: (R)AADEEAFEDNSEEYIR(R)

Exclusive (unique to this protein): TRUE

SEQUEST XCorr score: 2.93 SEQUEST DCn score: 0.832

Fix modifications: None

Variable modifications: None

charge: 2

Observed m/z: 944.3967

Actual minus calculated peptide mass (AMU): -0.003052

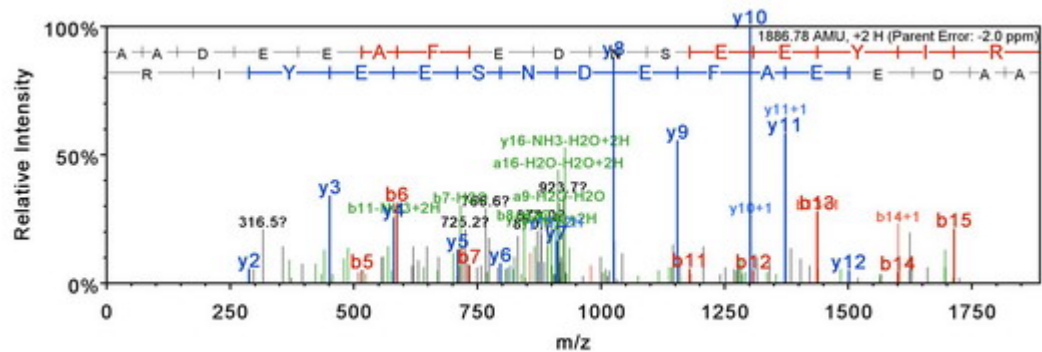

| B  | B Ions | B+2H  | B-NH3  | B-H2O  | AA | Y Ions | Y+2H  | Y-NH3  | Y-H2O  | Y  |
|----|--------|-------|--------|--------|----|--------|-------|--------|--------|----|
| 1  | 72.0   |       |        |        | A  | 1887.8 | 944.4 | 1870.8 | 1869.8 | 16 |
| 2  | 143.1  |       |        |        | A  | 1816.8 | 908.9 | 1799.7 | 1798.7 | 15 |
| 3  | 258.1  |       |        | 240.1  | D  | 1745.7 | 873.4 | 1728.7 | 1727.7 | 14 |
| 4  | 387.2  |       |        | 369.1  | E  | 1630.7 | 815.9 | 1613.7 | 1612.7 | 13 |
| 5  | 516.2  |       |        | 498.2  | E  | 1501.6 | 751.3 | 1484.6 | 1483.6 | 12 |
| 6  | 587.2  | 294.1 |        | 569.2  | A  | 1372.6 | 686.8 | 1355.6 | 1354.6 | 11 |
| 7  | 734.3  | 367.7 |        | 716.3  | F  | 1301.6 | 651.3 | 1284.5 | 1283.5 | 10 |
| 8  | 863.3  | 432.2 |        | 845.3  | E  | 1154.5 | 577.8 | 1137.5 | 1136.5 | 9  |
| 9  | 978.4  | 489.7 |        | 960.4  | D  | 1025.5 | 513.2 | 1008.4 | 1007.4 | 8  |
| 10 | 1092.4 | 546.7 | 1075.4 | 1074.4 | N  | 910.4  | 455.7 | 893.4  | 892.4  | 7  |
| 11 | 1179.4 | 590.2 | 1162.4 | 1161.4 | S  | 796.4  | 398.7 | 779.4  | 778.4  | 6  |
| 12 | 1308.5 | 654.8 | 1291.5 | 1290.5 | E  | 709.4  |       | 692.3  | 691.3  | 5  |
| 13 | 1437.5 | 719.3 | 1420.5 | 1419.5 | E  | 580.3  |       | 563.3  | 562.3  | 4  |
| 14 | 1600.6 | 800.8 | 1583.6 | 1582.6 | Y  | 451.3  |       | 434.2  |        | 3  |
| 15 | 1713.7 | 857.3 | 1696.7 | 1695.7 | I  | 288.2  |       | 271.2  |        | 2  |
| 16 | 1887.8 | 944.4 | 1870.8 | 1869.8 | R  | 175.1  |       | 158.1  |        | 1  |

Gene symbol: Cull1

Protein name: Cullin-1

Protein accession numbers: IPI00124047

Peptide sequence: (K)HQQLLGEVLTQLSSR(F)

Exclusive (unique to this protein): TRUE

SEQUEST XCorr score: 2.16 SEQUEST DCn score: 0.704

Fix modifications: None

Variable modifications: None

charge: 2

Observed m/z: 854.9686

Actual minus calculated peptide mass (AMU): -0.005371

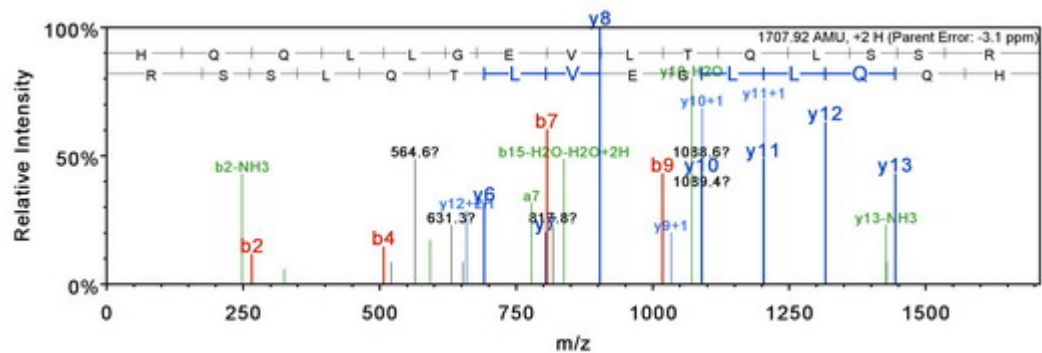

| B  | B Ions | B+2H  | B-NH3  | B-H2O  | AA | Y Ions | Y+2H  | Y-NH3  | Y-H2O  | Y  |
|----|--------|-------|--------|--------|----|--------|-------|--------|--------|----|
| 1  | 138.1  | 69.5  |        |        | H  | 1708.9 | 855.0 | 1691.9 | 1690.9 | 15 |
| 2  | 266.1  | 133.6 | 249.1  |        | Q  | 1571.9 | 786.4 | 1554.9 | 1553.9 | 14 |
| 3  | 394.2  | 197.6 | 377.2  |        | Q  | 1443.8 | 722.4 | 1426.8 | 1425.8 | 13 |
| 4  | 507.3  | 254.1 | 490.2  |        | L  | 1315.8 | 658.4 | 1298.7 | 1297.8 | 12 |
| 5  | 620.4  | 310.7 | 603.3  |        | L  | 1202.7 | 601.8 | 1185.7 | 1184.7 | 11 |
| 6  | 677.4  | 339.2 | 660.4  |        | G  | 1089.6 | 545.3 | 1072.6 | 1071.6 | 10 |
| 7  | 806.4  | 403.7 | 789.4  | 788.4  | E  | 1032.6 | 516.8 | 1015.5 | 1014.6 | 9  |
| 8  | 905.5  | 453.3 | 888.5  | 887.5  | V  | 903.5  | 452.3 | 886.5  | 885.5  | 8  |
| 9  | 1018.6 | 509.8 | 1001.5 | 1000.6 | L  | 804.5  | 402.7 | 787.4  | 786.5  | 7  |
| 10 | 1119.6 | 560.3 | 1102.6 | 1101.6 | T  | 691.4  | 346.2 | 674.4  | 673.4  | 6  |
| 11 | 1247.7 | 624.3 | 1230.7 | 1229.7 | Q  | 590.3  |       | 573.3  | 572.3  | 5  |
| 12 | 1360.8 | 680.9 | 1343.7 | 1342.8 | L  | 462.3  |       | 445.2  | 444.3  | 4  |
| 13 | 1447.8 | 724.4 | 1430.8 | 1429.8 | S  | 349.2  |       | 332.2  | 331.2  | 3  |
| 14 | 1534.8 | 767.9 | 1517.8 | 1516.8 | S  | 262.1  |       | 245.1  | 244.1  | 2  |
| 15 | 1708.9 | 855.0 | 1691.9 | 1690.9 | R  | 175.1  |       | 158.1  |        | 1  |

Gene symbol: Cys;LOC672195

Protein name: Cytochrome c, somatic

Protein accession numbers: IPI00222419,IPI00265239

Peptide sequence: (K)TGPNLHGLFGR(K)

Exclusive (unique to this protein): TRUE

SEQUEST XCorr score: 2.34 SEQUEST DCn score: 0.7

Fix modifications: None

Variable modifications: None

charge: 2

Observed m/z: 584.814

Actual minus calculated peptide mass (AMU): -0.002686

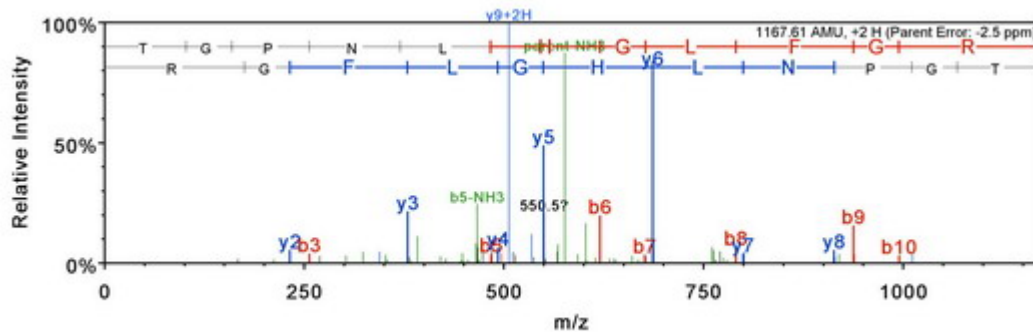

| B  | B Ions | B+2H  | B-NH3  | B-H2O  | AA | Y Ions | Y+2H  | Y-NH3  | Y-H2O  | Y  |
|----|--------|-------|--------|--------|----|--------|-------|--------|--------|----|
| 1  | 102.1  |       |        | 84.0   | T  | 1168.6 | 584.8 | 1151.6 | 1150.6 | 11 |
| 2  | 159.1  |       |        | 141.1  | G  | 1067.6 | 534.3 | 1050.5 |        | 10 |
| 3  | 256.1  |       |        | 238.1  | P  | 1010.6 | 505.8 | 993.5  |        | 9  |
| 4  | 370.2  |       | 353.2  | 352.2  | N  | 913.5  | 457.3 | 896.5  |        | 8  |
| 5  | 483.3  |       | 466.2  | 465.3  | L  | 799.5  | 400.2 | 782.4  |        | 7  |
| 6  | 620.3  | 310.7 | 603.3  | 602.3  | H  | 686.4  | 343.7 | 669.4  |        | 6  |
| 7  | 677.3  | 339.2 | 660.3  | 659.3  | G  | 549.3  |       | 532.3  |        | 5  |
| 8  | 790.4  | 395.7 | 773.4  | 772.4  | L  | 492.3  |       | 475.3  |        | 4  |
| 9  | 937.5  | 469.3 | 920.5  | 919.5  | F  | 379.2  |       | 362.2  |        | 3  |
| 10 | 994.5  | 497.8 | 977.5  | 976.5  | G  | 232.1  |       | 215.1  |        | 2  |
| 11 | 1168.6 | 584.8 | 1151.6 | 1150.6 | R  | 175.1  |       | 158.1  |        | 1  |



Gene symbol: D10Jhu81e

Protein name: ES1 protein homolog, mitochondrial precursor

Protein accession numbers: IPI00133284

Peptide sequence: (K)ITSLAQLNAANHDAAIFPGGFGAAK(N)

Exclusive (unique to this protein): TRUE

SEQUEST XCorr score: 2.03 SEQUEST DCn score: 0.662

Fix modifications: None

Variable modifications: None

charge: 2

Observed m/z: 1228.1467

Actual minus calculated peptide mass (AMU): 0.011954

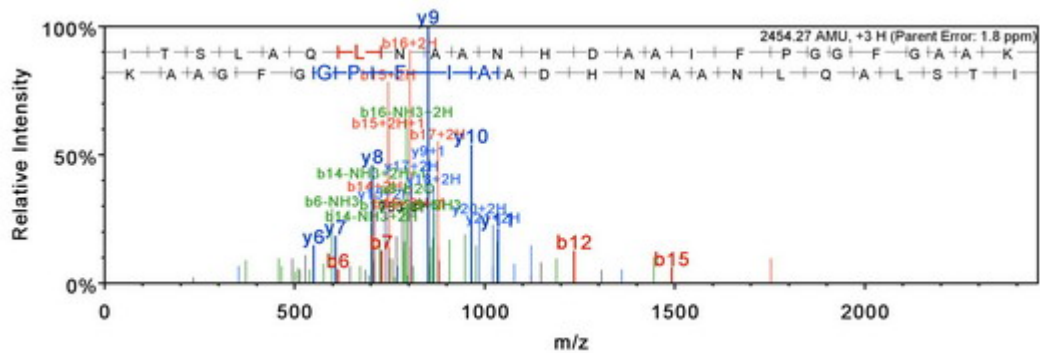

| B  | B ions | B+2H   | B-NH3  | B-H2O  | AA | Y ions | Y+2H   | Y-NH3  | Y-H2O  | Y  |
|----|--------|--------|--------|--------|----|--------|--------|--------|--------|----|
| 1  | 114.1  |        |        |        | I  | 2455.3 | 1228.1 | 2438.3 | 2437.3 | 25 |
| 2  | 215.1  |        |        | 197.1  | T  | 2342.2 | 1171.6 | 2325.2 | 2324.2 | 24 |
| 3  | 302.2  |        |        | 284.2  | S  | 2241.1 | 1121.1 | 2224.1 | 2223.1 | 23 |
| 4  | 415.3  |        |        | 397.3  | L  | 2154.1 | 1077.6 | 2137.1 | 2136.1 | 22 |
| 5  | 486.3  |        |        | 468.3  | A  | 2041.0 | 1021.0 | 2024.0 | 2023.0 | 21 |
| 6  | 614.4  | 307.7  | 597.3  | 596.3  | Q  | 1970.0 | 985.5  | 1953.0 | 1952.0 | 20 |
| 7  | 727.4  | 364.2  | 710.4  | 709.4  | L  | 1841.9 | 921.5  | 1824.9 | 1823.9 | 19 |
| 8  | 841.5  | 421.2  | 824.5  | 823.5  | N  | 1728.9 | 864.9  | 1711.8 | 1710.8 | 18 |
| 9  | 912.5  | 456.8  | 895.5  | 894.5  | A  | 1614.8 | 807.9  | 1597.8 | 1596.8 | 17 |
| 10 | 983.6  | 492.3  | 966.5  | 965.5  | A  | 1543.8 | 772.4  | 1526.7 | 1525.8 | 16 |
| 11 | 1097.6 | 549.3  | 1080.6 | 1079.6 | N  | 1472.7 | 736.9  | 1455.7 | 1454.7 | 15 |
| 12 | 1234.7 | 617.8  | 1217.6 | 1216.6 | H  | 1358.7 | 679.9  | 1341.7 | 1340.7 | 14 |
| 13 | 1349.7 | 675.3  | 1332.7 | 1331.7 | D  | 1221.6 | 611.3  | 1204.6 | 1203.6 | 13 |
| 14 | 1420.7 | 710.9  | 1403.7 | 1402.7 | A  | 1106.6 | 553.8  | 1089.6 |        | 12 |
| 15 | 1491.8 | 746.4  | 1474.7 | 1473.8 | A  | 1035.6 | 518.3  | 1018.5 |        | 11 |
| 16 | 1604.8 | 802.9  | 1587.8 | 1586.8 | I  | 964.5  | 482.8  | 947.5  |        | 10 |
| 17 | 1751.9 | 876.5  | 1734.9 | 1733.9 | F  | 851.4  | 426.2  | 834.4  |        | 9  |
| 18 | 1849.0 | 925.0  | 1831.9 | 1831.0 | P  | 704.4  | 352.7  | 687.4  |        | 8  |
| 19 | 1906.0 | 953.5  | 1889.0 | 1888.0 | G  | 607.3  | 304.2  | 590.3  |        | 7  |
| 20 | 1963.0 | 982.0  | 1946.0 | 1945.0 | G  | 550.3  | 275.7  | 533.3  |        | 6  |
| 21 | 2110.1 | 1055.5 | 2093.1 | 2092.1 | F  | 493.3  |        | 476.3  |        | 5  |
| 22 | 2167.1 | 1084.0 | 2150.1 | 2149.1 | G  | 346.2  |        | 329.2  |        | 4  |
| 23 | 2238.1 | 1119.6 | 2221.1 | 2220.1 | A  | 289.2  |        | 272.2  |        | 3  |
| 24 | 2309.2 | 1155.1 | 2292.1 | 2291.2 | A  | 218.2  |        | 201.1  |        | 2  |
| 25 | 2455.3 | 1228.1 | 2438.3 | 2437.3 | K  | 147.1  |        | 130.1  |        | 1  |

Gene symbol: Dctn2  
 Protein name: Dynactin subunit 2  
 Protein accession numbers: IPI00116112  
 Peptide sequence: (R)ENLATVEGNFASIDAR(M)  
 Exclusive (unique to this protein): TRUE  
 SEQUEST XCorr score: 2.67 SEQUEST DCn score: 0.687  
 Fix modifications: None  
 Variable modifications: None  
 charge: 2 Observed m/z: 853.9185  
 Actual minus calculated peptide mass (AMU): -0.005859

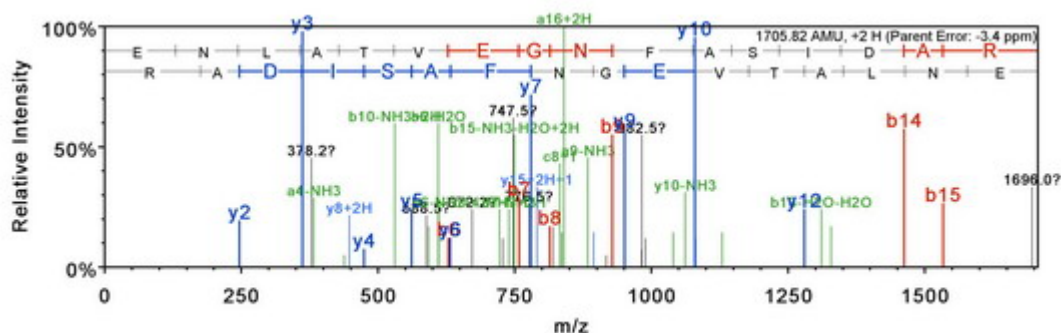

| B  | B ions | B+2H  | B-NH3  | B-H2O  | AA | Y ions | Y+2H  | Y-NH3  | Y-H2O  | Y  |
|----|--------|-------|--------|--------|----|--------|-------|--------|--------|----|
| 1  | 130.1  |       |        | 112.0  | E  | 1706.8 | 853.9 | 1689.8 | 1688.8 | 16 |
| 2  | 244.1  |       | 227.1  | 226.1  | N  | 1577.8 | 789.4 | 1560.8 | 1559.8 | 15 |
| 3  | 357.2  |       | 340.2  | 339.2  | L  | 1463.8 | 732.4 | 1446.7 | 1445.7 | 14 |
| 4  | 428.2  |       | 411.2  | 410.2  | A  | 1350.7 | 675.8 | 1333.6 | 1332.7 | 13 |
| 5  | 529.3  |       | 512.2  | 511.3  | T  | 1279.6 | 640.3 | 1262.6 | 1261.6 | 12 |
| 6  | 628.3  | 314.7 | 611.3  | 610.3  | V  | 1178.6 | 589.8 | 1161.5 | 1160.6 | 11 |
| 7  | 757.4  | 379.2 | 740.4  | 739.4  | E  | 1079.5 | 540.3 | 1062.5 | 1061.5 | 10 |
| 8  | 814.4  | 407.7 | 797.4  | 796.4  | G  | 950.5  | 475.7 | 933.4  | 932.5  | 9  |
| 9  | 928.4  | 464.7 | 911.4  | 910.4  | N  | 893.5  | 447.2 | 876.4  | 875.4  | 8  |
| 10 | 1075.5 | 538.3 | 1058.5 | 1057.5 | F  | 779.4  | 390.2 | 762.4  | 761.4  | 7  |
| 11 | 1146.5 | 573.8 | 1129.5 | 1128.5 | A  | 632.3  | 316.7 | 615.3  | 614.3  | 6  |
| 12 | 1233.6 | 617.3 | 1216.5 | 1215.6 | S  | 561.3  |       | 544.3  | 543.3  | 5  |
| 13 | 1346.7 | 673.8 | 1329.6 | 1328.7 | I  | 474.3  |       | 457.2  | 456.3  | 4  |
| 14 | 1461.7 | 731.4 | 1444.7 | 1443.7 | D  | 361.2  |       | 344.2  | 343.2  | 3  |
| 15 | 1532.7 | 766.9 | 1515.7 | 1514.7 | A  | 246.2  |       | 229.1  |        | 2  |
| 16 | 1706.8 | 853.9 | 1689.8 | 1688.8 | R  | 175.1  |       | 158.1  |        | 1  |

Gene symbol: Dcun1d1  
 Protein name: testis derived transcript 3  
 Protein accession numbers: IPI00316951,IPI00752092,IPI00785543,IPI00849604  
 Peptide sequence: (K)LDVATDNFFQNPELYIR(E)  
 Exclusive (unique to this protein): TRUE  
 SEQUEST XCorr score: 2.31 SEQUEST DCn score: 0.729  
 Fix modifications: None  
 Variable modifications: None

charge: 2 Observed m/z: 1028.0104

Actual minus calculated peptide mass (AMU): -0.006104

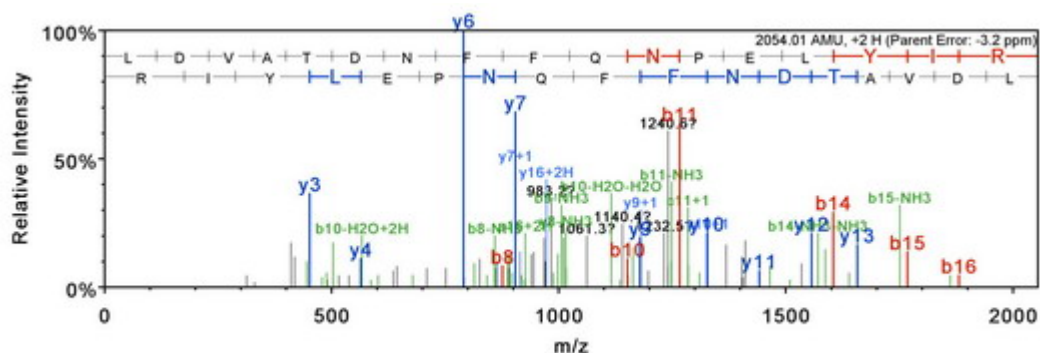

| B  | B ions | B+2H   | B-NH3  | B-H2O  | A,A | Y ions | Y+2H   | Y-NH3  | Y-H2O  | Y  |
|----|--------|--------|--------|--------|-----|--------|--------|--------|--------|----|
| 1  | 114.1  |        |        |        | L   | 2055.0 | 1028.0 | 2038.0 | 2037.0 | 17 |
| 2  | 229.1  |        |        | 211.1  | D   | 1941.9 | 971.5  | 1924.9 | 1923.9 | 16 |
| 3  | 328.2  |        |        | 310.2  | V   | 1826.9 | 914.0  | 1809.9 | 1808.9 | 15 |
| 4  | 399.2  |        |        | 381.2  | A   | 1727.8 | 864.4  | 1710.8 | 1709.8 | 14 |
| 5  | 500.3  |        |        | 482.3  | T   | 1656.8 | 828.9  | 1639.8 | 1638.8 | 13 |
| 6  | 615.3  | 308.2  |        | 597.3  | D   | 1555.8 | 778.4  | 1538.7 | 1537.7 | 12 |
| 7  | 729.3  | 365.2  | 712.3  | 711.3  | N   | 1440.7 | 720.9  | 1423.7 | 1422.7 | 11 |
| 8  | 876.4  | 438.7  | 859.4  | 858.4  | F   | 1326.7 | 663.9  | 1309.7 | 1308.7 | 10 |
| 9  | 1023.5 | 512.2  | 1006.5 | 1005.5 | F   | 1179.6 | 590.3  | 1162.6 | 1161.6 | 9  |
| 10 | 1151.5 | 576.3  | 1134.5 | 1133.5 | Q   | 1032.5 | 516.8  | 1015.5 | 1014.5 | 8  |
| 11 | 1265.6 | 633.3  | 1248.5 | 1247.6 | N   | 904.5  | 452.8  | 887.5  | 886.5  | 7  |
| 12 | 1362.6 | 681.8  | 1345.6 | 1344.6 | P   | 790.5  | 395.7  | 773.4  | 772.4  | 6  |
| 13 | 1491.7 | 746.3  | 1474.7 | 1473.7 | E   | 693.4  |        | 676.4  | 675.4  | 5  |
| 14 | 1604.8 | 802.9  | 1587.7 | 1586.8 | L   | 564.4  |        | 547.3  |        | 4  |
| 15 | 1767.8 | 884.4  | 1750.8 | 1749.8 | Y   | 451.3  |        | 434.2  |        | 3  |
| 16 | 1880.9 | 941.0  | 1863.9 | 1862.9 | I   | 288.2  |        | 271.2  |        | 2  |
| 17 | 2055.0 | 1028.0 | 2038.0 | 2037.0 | R   | 175.1  |        | 158.1  |        | 1  |

Gene symbol: Dcxr

Protein name: L-xylulose reductase

Protein accession numbers: IPI00395140,IPI00649563

Peptide sequence: (R)GVPGAIVNVSSQASQR(A)

Exclusive (unique to this protein): TRUE

SEQUEST XCorr score: 2.17 SEQUEST DCn score: 0.63

Fix modifications: None

Variable modifications: None

charge: 2 Observed m/z: 785.4227

Actual minus calculated peptide mass (AMU): 0.002686

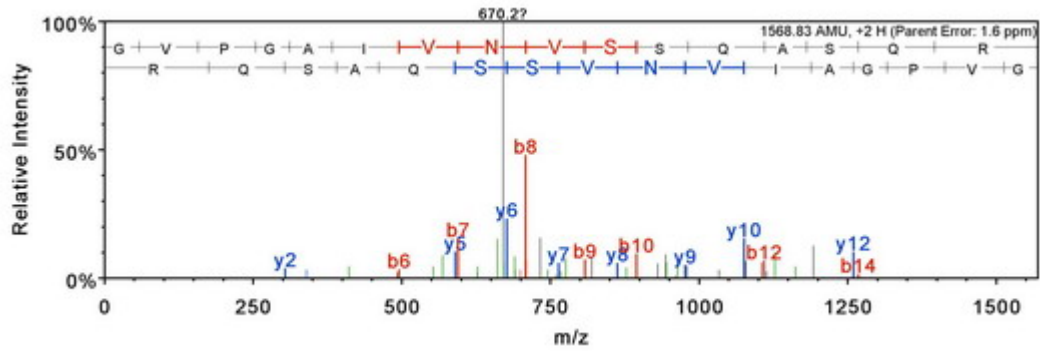

| B  | B ions | B+2H  | B-NH3  | B-H2O  | AA | Y ions | Y+2H  | Y-NH3  | Y-H2O  | Y  |
|----|--------|-------|--------|--------|----|--------|-------|--------|--------|----|
| 1  | 58.0   |       |        |        | G  | 1569.8 | 785.4 | 1552.8 | 1551.8 | 16 |
| 2  | 157.1  |       |        |        | V  | 1512.8 | 756.9 | 1495.8 | 1494.8 | 15 |
| 3  | 254.2  |       |        |        | P  | 1413.7 | 707.4 | 1396.7 | 1395.7 | 14 |
| 4  | 311.2  |       |        |        | G  | 1316.7 | 658.9 | 1299.7 | 1298.7 | 13 |
| 5  | 382.2  |       |        |        | A  | 1259.7 | 630.3 | 1242.6 | 1241.7 | 12 |
| 6  | 495.3  | 248.2 |        |        | I  | 1188.6 | 594.8 | 1171.6 | 1170.6 | 11 |
| 7  | 594.4  | 297.7 |        |        | V  | 1075.5 | 538.3 | 1058.5 | 1057.5 | 10 |
| 8  | 708.4  | 354.7 | 691.4  |        | N  | 976.5  | 488.7 | 959.5  | 958.5  | 9  |
| 9  | 807.5  | 404.2 | 790.5  |        | V  | 862.4  | 431.7 | 845.4  | 844.4  | 8  |
| 10 | 894.5  | 447.8 | 877.5  | 876.5  | S  | 763.4  | 382.2 | 746.3  | 745.4  | 7  |
| 11 | 981.5  | 491.3 | 964.5  | 963.5  | S  | 676.3  | 338.7 | 659.3  | 658.3  | 6  |
| 12 | 1109.6 | 555.3 | 1092.6 | 1091.6 | Q  | 589.3  |       | 572.3  | 571.3  | 5  |
| 13 | 1180.6 | 590.8 | 1163.6 | 1162.6 | A  | 461.3  |       | 444.2  | 443.2  | 4  |
| 14 | 1267.7 | 634.3 | 1250.6 | 1249.7 | S  | 390.2  |       | 373.2  | 372.2  | 3  |
| 15 | 1395.7 | 698.4 | 1378.7 | 1377.7 | Q  | 303.2  |       | 286.2  |        | 2  |
| 16 | 1569.8 | 785.4 | 1552.8 | 1551.8 | R  | 175.1  |       | 158.1  |        | 1  |

Gene symbol: Ddx19a

Protein name: ATP-dependent RNA helicase DDX19A

Protein accession numbers: IPI00123651

Peptide sequence: (R)SNLVDNTNQVEVLQR(D)

Exclusive (unique to this protein): TRUE

SEQUEST XCorr score: 2.17 SEQUEST DCn score: 0.479

Fix modifications: None

Variable modifications: None

charge: 2

Observed m/z: 864.9445

Actual minus calculated peptide mass (AMU): -0.006958

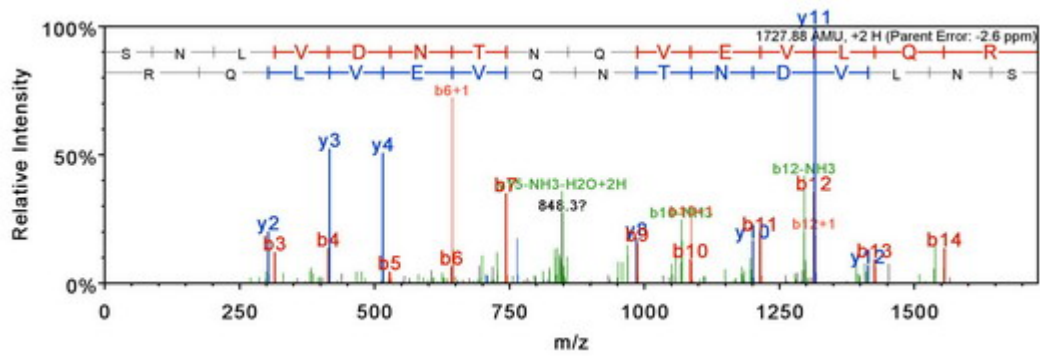

| B  | B ions | B+2H  | B-NH3  | B-H2O  | AA | Y ions | Y+2H  | Y-NH3  | Y-H2O  | Y  |
|----|--------|-------|--------|--------|----|--------|-------|--------|--------|----|
| 1  | 88.0   |       |        | 70.0   | S  | 1728.9 | 865.0 | 1711.9 | 1710.9 | 15 |
| 2  | 202.1  |       | 185.1  | 184.1  | N  | 1641.9 | 821.4 | 1624.8 | 1623.9 | 14 |
| 3  | 315.2  |       | 298.1  | 297.2  | L  | 1527.8 | 764.4 | 1510.8 | 1509.8 | 13 |
| 4  | 414.2  |       | 397.2  | 396.2  | V  | 1414.7 | 707.9 | 1397.7 | 1396.7 | 12 |
| 5  | 529.3  |       | 512.2  | 511.3  | D  | 1315.7 | 658.3 | 1298.6 | 1297.7 | 11 |
| 6  | 643.3  | 322.2 | 626.3  | 625.3  | N  | 1200.6 | 600.8 | 1183.6 | 1182.6 | 10 |
| 7  | 744.4  | 372.7 | 727.3  | 726.3  | T  | 1086.6 | 543.8 | 1069.6 | 1068.6 | 9  |
| 8  | 858.4  | 429.7 | 841.4  | 840.4  | N  | 985.5  | 493.3 | 968.5  | 967.5  | 8  |
| 9  | 986.5  | 493.7 | 969.4  | 968.4  | Q  | 871.5  | 436.3 | 854.5  | 853.5  | 7  |
| 10 | 1085.5 | 543.3 | 1068.5 | 1067.5 | V  | 743.4  | 372.2 | 726.4  | 725.4  | 6  |
| 11 | 1214.6 | 607.8 | 1197.5 | 1196.5 | E  | 644.4  |       | 627.4  | 626.4  | 5  |
| 12 | 1313.6 | 657.3 | 1296.6 | 1295.6 | V  | 515.3  |       | 498.3  |        | 4  |
| 13 | 1426.7 | 713.9 | 1409.7 | 1408.7 | L  | 416.3  |       | 399.2  |        | 3  |
| 14 | 1554.8 | 777.9 | 1537.8 | 1536.8 | Q  | 303.2  |       | 286.2  |        | 2  |
| 15 | 1728.9 | 865.0 | 1711.9 | 1710.9 | R  | 175.1  |       | 158.1  |        | 1  |

Gene symbol: Dera

Protein name: Putative deoxyribose-phosphate aldolase

Protein accession numbers: IPI00130333

Peptide sequence: (R)IGASSLLSDIER(Q)

Exclusive (unique to this protein): TRUE

SEQUEST XCorr score: 2.38 SEQUEST DCn score: 0.398

Fix modifications: None

Variable modifications: None

charge: 2

Observed m/z: 630.8433

Actual minus calculated peptide mass (AMU): -0.001343

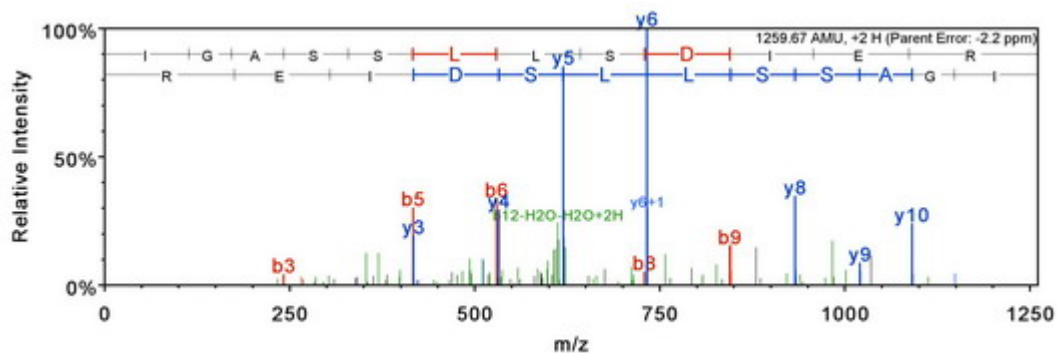

| B  | B Ions | B+2H  | B-NH3  | B-H2O  | AA | Y Ions | Y+2H  | Y-NH3  | Y-H2O  | Y  |
|----|--------|-------|--------|--------|----|--------|-------|--------|--------|----|
| 1  | 114.1  |       |        |        | I  | 1260.7 | 630.8 | 1243.7 | 1242.7 | 12 |
| 2  | 171.1  |       |        |        | G  | 1147.6 | 574.3 | 1130.6 | 1129.6 | 11 |
| 3  | 242.2  |       |        |        | A  | 1090.6 | 545.8 | 1073.5 | 1072.6 | 10 |
| 4  | 329.2  |       |        | 311.2  | S  | 1019.5 | 510.3 | 1002.5 | 1001.5 | 9  |
| 5  | 416.2  |       |        | 398.2  | S  | 932.5  | 466.8 | 915.5  | 914.5  | 8  |
| 6  | 529.3  | 265.1 |        | 511.3  | L  | 845.5  | 423.2 | 828.5  | 827.5  | 7  |
| 7  | 642.4  | 321.7 |        | 624.4  | L  | 732.4  | 366.7 | 715.4  | 714.4  | 6  |
| 8  | 729.4  | 365.2 |        | 711.4  | S  | 619.3  |       | 602.3  | 601.3  | 5  |
| 9  | 844.4  | 422.7 |        | 826.4  | D  | 532.3  |       | 515.3  | 514.3  | 4  |
| 10 | 957.5  | 479.3 |        | 939.5  | I  | 417.3  |       | 400.2  | 399.2  | 3  |
| 11 | 1086.6 | 543.8 |        | 1068.6 | E  | 304.2  |       | 287.1  | 286.2  | 2  |
| 12 | 1260.7 | 630.8 | 1243.7 | 1242.7 | R  | 175.1  |       | 158.1  |        | 1  |

Gene symbol: Dhhrs7b

Protein name: Dehydrogenase/reductase

Protein accession numbers: IPI00114878

Peptide sequence: (R)NAVVVVTGATSGLR(E)

Exclusive (unique to this protein): TRUE

SEQUEST XCorr score: 2.93 SEQUEST DCn score: 0.672

Fix modifications: None

Variable modifications: None

charge: 2

Observed m/z: 700.8969

Actual minus calculated peptide mass (AMU): -0.0001221

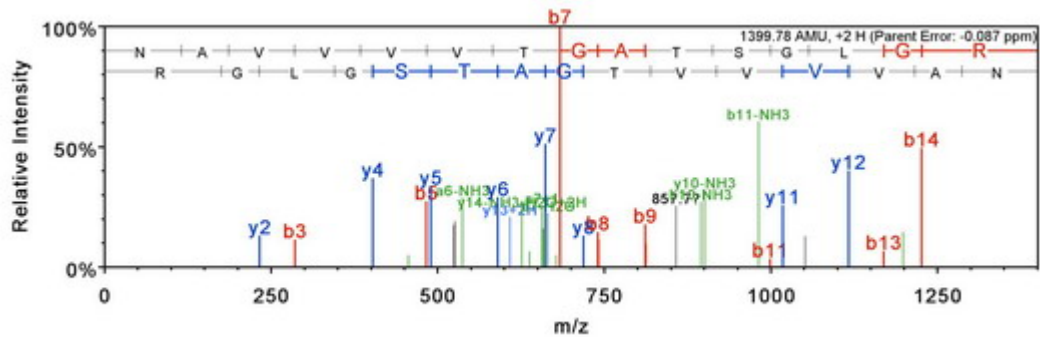

| B  | B Ions | B+2H  | B-NH3  | B-H2O  | AA | Y Ions | Y+2H  | Y-NH3  | Y-H2O  | Y  |
|----|--------|-------|--------|--------|----|--------|-------|--------|--------|----|
| 1  | 115.1  |       | 98.0   |        | N  | 1400.8 | 700.9 | 1383.8 | 1382.8 | 15 |
| 2  | 186.1  |       | 169.1  |        | A  | 1286.7 | 643.9 | 1269.7 | 1268.7 | 14 |
| 3  | 285.2  |       | 268.1  |        | V  | 1215.7 | 608.4 | 1198.7 | 1197.7 | 13 |
| 4  | 384.2  |       | 367.2  |        | V  | 1116.6 | 558.8 | 1099.6 | 1098.6 | 12 |
| 5  | 483.3  |       | 466.3  |        | V  | 1017.6 | 509.3 | 1000.5 | 999.6  | 11 |
| 6  | 582.4  | 291.7 | 565.3  |        | V  | 918.5  | 459.8 | 901.5  | 900.5  | 10 |
| 7  | 683.4  | 342.2 | 666.4  | 665.4  | T  | 819.4  | 410.2 | 802.4  | 801.4  | 9  |
| 8  | 740.4  | 370.7 | 723.4  | 722.4  | G  | 718.4  | 359.7 | 701.4  | 700.4  | 8  |
| 9  | 811.5  | 406.2 | 794.4  | 793.5  | A  | 661.4  | 331.2 | 644.3  | 643.4  | 7  |
| 10 | 912.5  | 456.8 | 895.5  | 894.5  | T  | 590.3  | 295.7 | 573.3  | 572.3  | 6  |
| 11 | 999.6  | 500.3 | 982.5  | 981.5  | S  | 489.3  |       | 472.3  | 471.3  | 5  |
| 12 | 1056.6 | 528.8 | 1039.5 | 1038.6 | G  | 402.3  |       | 385.2  |        | 4  |
| 13 | 1169.7 | 585.3 | 1152.6 | 1151.6 | L  | 345.2  |       | 328.2  |        | 3  |
| 14 | 1226.7 | 613.8 | 1209.7 | 1208.7 | G  | 232.1  |       | 215.1  |        | 2  |
| 15 | 1400.8 | 700.9 | 1383.8 | 1382.8 | R  | 175.1  |       | 158.1  |        | 1  |

Gene symbol: Dld

Protein name: TIB-55 BB88 cDNA, RIKEN full-length enriched library, clone:I730035F24  
product:dihydrolipoamide dehydrogenase, full insert sequence

Protein accession numbers: IPI00331564

Peptide sequence: (K)NETLGGTCLNVGCIPSK(A)

Exclusive (unique to this protein): TRUE

SEQUEST XCorr score: 2 SEQUEST DCn score: 0.606

Fix modifications: C8: Carbamidomethyl (+57.02), C13: Carbamidomethyl (+57.02) Variable modifications: None

charge: 2

Observed m/z: 910.4363

Actual minus calculated peptide mass (AMU): -0.003784

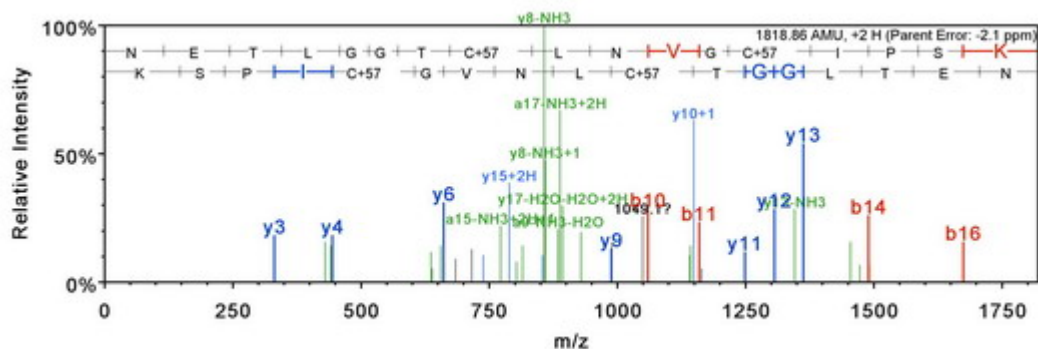

| B  | B Ions | B+2H  | B-NH3  | B-H2O  | AA   | Y Ions | Y+2H  | Y-NH3  | Y-H2O  | Y  |
|----|--------|-------|--------|--------|------|--------|-------|--------|--------|----|
| 1  | 115.1  |       | 98.0   |        | N    | 1819.9 | 910.4 | 1802.8 | 1801.9 | 17 |
| 2  | 244.1  |       | 227.1  | 226.1  | E    | 1705.8 | 853.4 | 1688.8 | 1687.8 | 16 |
| 3  | 345.1  |       | 328.1  | 327.1  | T    | 1576.8 | 788.9 | 1559.8 | 1558.8 | 15 |
| 4  | 458.2  |       | 441.2  | 440.2  | L    | 1475.7 | 738.4 | 1458.7 | 1457.7 | 14 |
| 5  | 515.3  |       | 498.2  | 497.2  | G    | 1362.7 | 681.8 | 1345.6 | 1344.6 | 13 |
| 6  | 572.3  | 286.6 | 555.2  | 554.3  | G    | 1305.6 | 653.3 | 1288.6 | 1287.6 | 12 |
| 7  | 673.3  | 337.2 | 656.3  | 655.3  | T    | 1248.6 | 624.8 | 1231.6 | 1230.6 | 11 |
| 8  | 833.4  | 417.2 | 816.3  | 815.3  | C+57 | 1147.6 | 574.3 | 1130.5 | 1129.5 | 10 |
| 9  | 946.4  | 473.7 | 929.4  | 928.4  | L    | 987.5  | 494.3 | 970.5  | 969.5  | 9  |
| 10 | 1060.5 | 530.7 | 1043.5 | 1042.5 | N    | 874.5  | 437.7 | 857.4  | 856.4  | 8  |
| 11 | 1159.5 | 580.3 | 1142.5 | 1141.5 | V    | 760.4  | 380.7 | 743.4  | 742.4  | 7  |
| 12 | 1216.6 | 608.8 | 1199.5 | 1198.5 | G    | 661.3  | 331.2 | 644.3  | 643.3  | 6  |
| 13 | 1376.6 | 688.8 | 1359.6 | 1358.6 | C+57 | 604.3  |       | 587.3  | 586.3  | 5  |
| 14 | 1489.7 | 745.3 | 1472.7 | 1471.7 | I    | 444.3  |       | 427.3  | 426.3  | 4  |
| 15 | 1586.7 | 793.9 | 1569.7 | 1568.7 | P    | 331.2  |       | 314.2  | 313.2  | 3  |
| 16 | 1673.8 | 837.4 | 1656.7 | 1655.8 | S    | 234.2  |       | 217.1  | 216.1  | 2  |
| 17 | 1819.9 | 910.4 | 1802.8 | 1801.9 | K    | 147.1  |       | 130.1  |        | 1  |

Gene symbol: Dmn

Protein name: Synemin isoform H

Protein accession numbers: IPI00469184

Peptide sequence: (K)PGPVVLSVGADISGSRMPGSR(S)

Exclusive (unique to this protein): TRUE

SEQUEST XCorr score: 2.59 SEQUEST DCn score: 0.24

Fix modifications: None

Variable modifications: None

charge: 3

Observed m/z: 742.3797

Actual minus calculated peptide mass (AMU): -0.011456

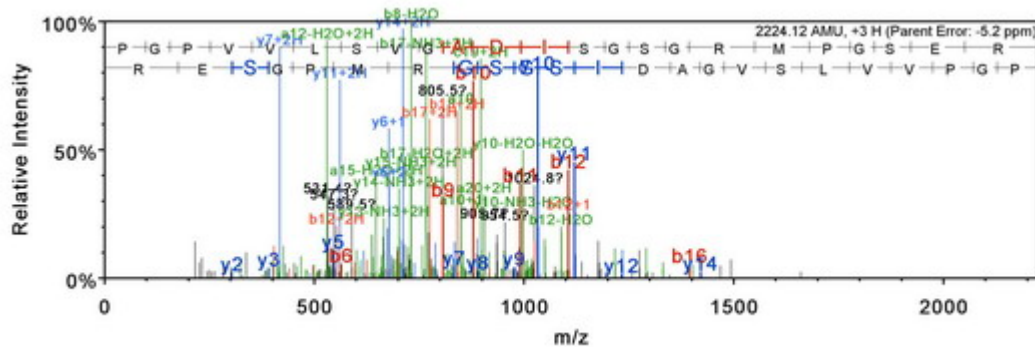



| B  | B Ions | B+2H   | B-NH3  | B-H2O  | A,A | Y Ions | Y+2H   | Y-NH3  | Y-H2O  | Y  |
|----|--------|--------|--------|--------|-----|--------|--------|--------|--------|----|
| 1  | 98.1   |        |        |        | P   | 2225.1 | 1113.1 | 2208.1 | 2207.1 | 23 |
| 2  | 155.1  |        |        |        | G   | 2128.1 | 1064.5 | 2111.1 | 2110.1 | 22 |
| 3  | 252.1  |        |        |        | P   | 2071.1 | 1036.0 | 2054.0 | 2053.1 | 21 |
| 4  | 351.2  |        |        |        | V   | 1974.0 | 987.5  | 1957.0 | 1956.0 | 20 |
| 5  | 450.3  |        |        |        | V   | 1874.9 | 938.0  | 1857.9 | 1856.9 | 19 |
| 6  | 563.4  | 282.2  |        |        | L   | 1775.9 | 888.4  | 1758.8 | 1757.9 | 18 |
| 7  | 650.4  | 325.7  |        | 632.4  | S   | 1662.8 | 831.9  | 1645.8 | 1644.8 | 17 |
| 8  | 749.5  | 375.2  |        | 731.5  | V   | 1575.8 | 788.4  | 1558.7 | 1557.7 | 16 |
| 9  | 806.5  | 403.7  |        | 788.5  | G   | 1476.7 | 738.9  | 1459.7 | 1458.7 | 15 |
| 10 | 877.5  | 439.3  |        | 859.5  | A   | 1419.7 | 710.3  | 1402.6 | 1401.7 | 14 |
| 11 | 992.5  | 496.8  |        | 974.5  | D   | 1348.6 | 674.8  | 1331.6 | 1330.6 | 13 |
| 12 | 1105.6 | 553.3  |        | 1087.6 | I   | 1233.6 | 617.3  | 1216.6 | 1215.6 | 12 |
| 13 | 1192.7 | 596.8  |        | 1174.7 | S   | 1120.5 | 560.8  | 1103.5 | 1102.5 | 11 |
| 14 | 1249.7 | 625.3  |        | 1231.7 | G   | 1033.5 | 517.3  | 1016.5 | 1015.5 | 10 |
| 15 | 1336.7 | 668.9  |        | 1318.7 | S   | 976.5  | 488.7  | 959.4  | 958.5  | 9  |
| 16 | 1393.7 | 697.4  |        | 1375.7 | G   | 889.4  | 445.2  | 872.4  | 871.4  | 8  |
| 17 | 1549.8 | 775.4  | 1532.8 | 1531.8 | R   | 832.4  | 416.7  | 815.4  | 814.4  | 7  |
| 18 | 1680.9 | 840.9  | 1663.9 | 1662.9 | M   | 676.3  | 338.7  | 659.3  | 658.3  | 6  |
| 19 | 1777.9 | 889.5  | 1760.9 | 1759.9 | P   | 545.3  |        | 528.2  | 527.3  | 5  |
| 20 | 1835.0 | 918.0  | 1817.9 | 1816.9 | G   | 448.2  |        | 431.2  | 430.2  | 4  |
| 21 | 1922.0 | 961.5  | 1905.0 | 1904.0 | S   | 391.2  |        | 374.2  | 373.2  | 3  |
| 22 | 2051.0 | 1026.0 | 2034.0 | 2033.0 | E   | 304.2  |        | 287.1  | 286.2  | 2  |
| 23 | 2225.1 | 1113.1 | 2208.1 | 2207.1 | R   | 175.1  |        | 158.1  |        | 1  |

Gene symbol: Dnaja2

Protein name: DnaJ homolog subfamily A member 2

Protein accession numbers: IPI00136251

Peptide sequence: (K)NVLCSACSGQGKGKSGAVQK(C)

Exclusive (unique to this protein): TRUE

SEQUEST XCorr score: 2.01 SEQUEST DCn score: 0.175

Fix modifications: C4: Carbamidomethyl (+57.02), C7: Carbamidomethyl (+57.02) Variable modifications: None

charge: 2

Observed m/z: 954.4629

Actual minus calculated peptide mass (AMU): 0.011149

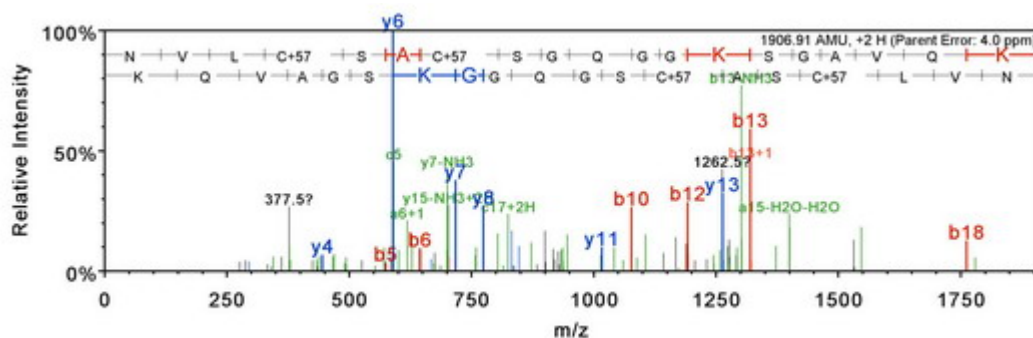

| B  | B Ions | B+2H  | B-NH3  | B-H2O  | AA   | Y Ions | Y+2H  | Y-NH3  | Y-H2O  | Y  |
|----|--------|-------|--------|--------|------|--------|-------|--------|--------|----|
| 1  | 115.1  |       | 98.0   |        | N    | 1907.9 | 954.5 | 1890.9 | 1889.9 | 19 |
| 2  | 214.1  |       | 197.1  |        | V    | 1793.9 | 897.4 | 1776.8 | 1775.9 | 18 |
| 3  | 327.2  |       | 310.2  |        | L    | 1694.8 | 847.9 | 1677.8 | 1676.8 | 17 |
| 4  | 487.2  |       | 470.2  |        | C+57 | 1581.7 | 791.4 | 1564.7 | 1563.7 | 16 |
| 5  | 574.3  |       | 557.2  | 556.3  | S    | 1421.7 | 711.3 | 1404.7 | 1403.7 | 15 |
| 6  | 645.3  | 323.2 | 628.3  | 627.3  | A    | 1334.7 | 667.8 | 1317.6 | 1316.6 | 14 |
| 7  | 805.3  | 403.2 | 788.3  | 787.3  | C+57 | 1263.6 | 632.3 | 1246.6 | 1245.6 | 13 |
| 8  | 892.4  | 446.7 | 875.3  | 874.4  | S    | 1103.6 | 552.3 | 1086.5 | 1085.6 | 12 |
| 9  | 949.4  | 475.2 | 932.4  | 931.4  | G    | 1016.6 | 508.8 | 999.5  | 998.5  | 11 |
| 10 | 1077.5 | 539.2 | 1060.4 | 1059.4 | Q    | 959.5  | 480.3 | 942.5  | 941.5  | 10 |
| 11 | 1134.5 | 567.7 | 1117.4 | 1116.5 | G    | 831.5  | 416.2 | 814.4  | 813.5  | 9  |
| 12 | 1191.5 | 596.3 | 1174.5 | 1173.5 | G    | 774.5  | 387.7 | 757.4  | 756.4  | 8  |
| 13 | 1319.6 | 660.3 | 1302.6 | 1301.6 | K    | 717.4  | 359.2 | 700.4  | 699.4  | 7  |
| 14 | 1406.6 | 703.8 | 1389.6 | 1388.6 | S    | 589.3  | 295.2 | 572.3  | 571.3  | 6  |
| 15 | 1463.6 | 732.3 | 1446.6 | 1445.6 | G    | 502.3  |       | 485.3  |        | 5  |
| 16 | 1534.7 | 767.8 | 1517.7 | 1516.7 | A    | 445.3  |       | 428.3  |        | 4  |
| 17 | 1633.7 | 817.4 | 1616.7 | 1615.7 | V    | 374.2  |       | 357.2  |        | 3  |
| 18 | 1761.8 | 881.4 | 1744.8 | 1743.8 | Q    | 275.2  |       | 258.1  |        | 2  |
| 19 | 1907.9 | 954.5 | 1890.9 | 1889.9 | K    | 147.1  |       | 130.1  |        | 1  |

Gene symbol: Dnajc13

Protein name: DnaJ (Hsp40) homolog, subfamily C, member 13 isoform 1

Protein accession numbers: IPI00378580,IPI00458074

Peptide sequence: (R)SLQYGEQVSEILSR(S)

Exclusive (unique to this protein): TRUE

SEQUEST XCorr score: 2.46 SEQUEST DCn score: 0.487

Fix modifications: None

Variable modifications: None

charge: 2

Observed m/z: 804.9125

Actual minus calculated peptide mass (AMU): -0.006226

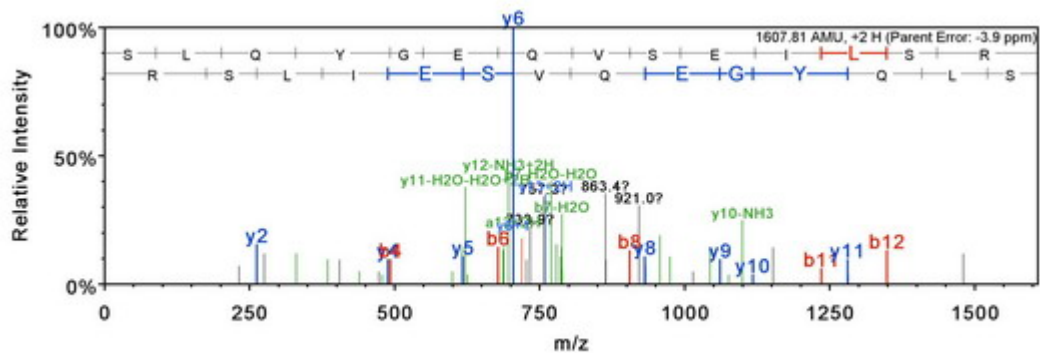

| B  | B Ions | B+2H  | B-NH3  | B-H2O  | A,A | Y Ions | Y+2H  | Y-NH3  | Y-H2O  | Y  |
|----|--------|-------|--------|--------|-----|--------|-------|--------|--------|----|
| 1  | 88.0   |       |        | 70.0   | S   | 1608.8 | 804.9 | 1591.8 | 1590.8 | 14 |
| 2  | 201.1  |       |        | 183.1  | L   | 1521.8 | 761.4 | 1504.8 | 1503.8 | 13 |
| 3  | 329.2  |       | 312.2  | 311.2  | Q   | 1408.7 | 704.9 | 1391.7 | 1390.7 | 12 |
| 4  | 492.3  |       | 475.2  | 474.2  | Y   | 1280.7 | 640.8 | 1263.6 | 1262.6 | 11 |
| 5  | 549.3  |       | 532.2  | 531.3  | G   | 1117.6 | 559.3 | 1100.6 | 1099.6 | 10 |
| 6  | 678.3  | 339.7 | 661.3  | 660.3  | E   | 1060.6 | 530.8 | 1043.5 | 1042.5 | 9  |
| 7  | 806.4  | 403.7 | 789.3  | 788.4  | Q   | 931.5  | 466.3 | 914.5  | 913.5  | 8  |
| 8  | 905.4  | 453.2 | 888.4  | 887.4  | V   | 803.5  | 402.2 | 786.4  | 785.5  | 7  |
| 9  | 992.5  | 496.7 | 975.4  | 974.5  | S   | 704.4  | 352.7 | 687.4  | 686.4  | 6  |
| 10 | 1121.5 | 561.3 | 1104.5 | 1103.5 | E   | 617.4  |       | 600.3  | 599.4  | 5  |
| 11 | 1234.6 | 617.8 | 1217.6 | 1216.6 | I   | 488.3  |       | 471.3  | 470.3  | 4  |
| 12 | 1347.7 | 674.3 | 1330.7 | 1329.7 | L   | 375.2  |       | 358.2  | 357.2  | 3  |
| 13 | 1434.7 | 717.9 | 1417.7 | 1416.7 | S   | 262.1  |       | 245.1  | 244.1  | 2  |
| 14 | 1608.8 | 804.9 | 1591.8 | 1590.8 | R   | 175.1  |       | 158.1  |        | 1  |

Gene symbol: Dnm1l

Protein name: Isoform 2 of Dynamin-1-like protein

Protein accession numbers: IPI00172221,IPI00556723,IPI00556781

Peptide sequence: (R)TLESVDPLGGLNTIDILTAIR(N)

Exclusive (unique to this protein): TRUE

SEQUEST XCorr score: 2.75 SEQUEST DCn score: 0.765

Fix modifications: None

Variable modifications: None

charge: 2 Observed m/z: 1106.1146

Actual minus calculated peptide mass (AMU): -0.002686

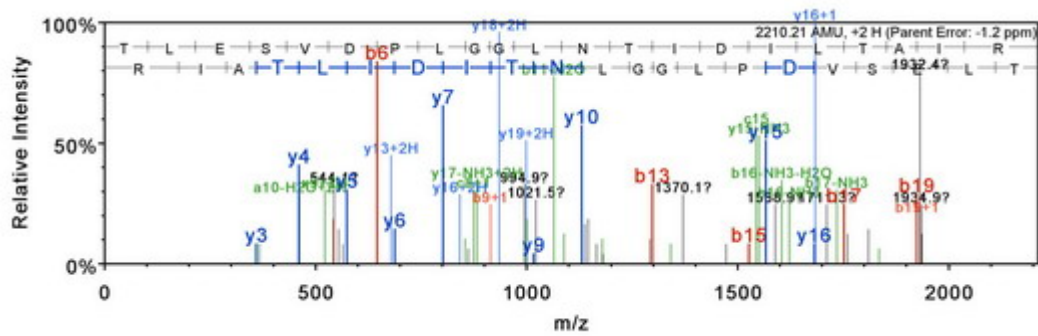

| B  | B Ions | B+2H   | B-NH3  | B-H2O  | AA | Y Ions | Y+2H   | Y-NH3  | Y-H2O  | Y  |
|----|--------|--------|--------|--------|----|--------|--------|--------|--------|----|
| 1  | 102.1  |        |        | 84.0   | T  | 2211.2 | 1106.1 | 2194.2 | 2193.2 | 21 |
| 2  | 215.1  |        |        | 197.1  | L  | 2110.2 | 1055.6 | 2093.2 | 2092.2 | 20 |
| 3  | 344.2  |        |        | 326.2  | E  | 1997.1 | 999.1  | 1980.1 | 1979.1 | 19 |
| 4  | 431.2  |        |        | 413.2  | S  | 1868.1 | 934.5  | 1851.0 | 1850.0 | 18 |
| 5  | 530.3  |        |        | 512.3  | V  | 1781.0 | 891.0  | 1764.0 | 1763.0 | 17 |
| 6  | 645.3  | 323.2  |        | 627.3  | D  | 1682.0 | 841.5  | 1664.9 | 1663.9 | 16 |
| 7  | 742.4  | 371.7  |        | 724.4  | P  | 1566.9 | 784.0  | 1549.9 | 1548.9 | 15 |
| 8  | 855.5  | 428.2  |        | 837.4  | L  | 1469.9 | 735.4  | 1452.8 | 1451.9 | 14 |
| 9  | 912.5  | 456.7  |        | 894.5  | G  | 1356.8 | 678.9  | 1339.8 | 1338.8 | 13 |
| 10 | 969.5  | 485.3  |        | 951.5  | G  | 1299.8 | 650.4  | 1282.7 | 1281.8 | 12 |
| 11 | 1082.6 | 541.8  |        | 1064.6 | L  | 1242.7 | 621.9  | 1225.7 | 1224.7 | 11 |
| 12 | 1196.6 | 598.8  | 1179.6 | 1178.6 | N  | 1129.7 | 565.3  | 1112.6 | 1111.7 | 10 |
| 13 | 1297.7 | 649.3  | 1280.6 | 1279.7 | T  | 1015.6 | 508.3  | 998.6  | 997.6  | 9  |
| 14 | 1410.8 | 705.9  | 1393.7 | 1392.7 | I  | 914.6  | 457.8  | 897.5  | 896.6  | 8  |
| 15 | 1525.8 | 763.4  | 1508.8 | 1507.8 | D  | 801.5  | 401.3  | 784.5  | 783.5  | 7  |
| 16 | 1638.9 | 819.9  | 1621.8 | 1620.9 | I  | 686.5  | 343.7  | 669.4  | 668.5  | 6  |
| 17 | 1751.9 | 876.5  | 1734.9 | 1733.9 | L  | 573.4  |        | 556.4  | 555.4  | 5  |
| 18 | 1853.0 | 927.0  | 1836.0 | 1835.0 | T  | 460.3  |        | 443.3  | 442.3  | 4  |
| 19 | 1924.0 | 962.5  | 1907.0 | 1906.0 | A  | 359.2  |        | 342.2  |        | 3  |
| 20 | 2037.1 | 1019.1 | 2020.1 | 2019.1 | I  | 288.2  |        | 271.2  |        | 2  |
| 21 | 2211.2 | 1106.1 | 2194.2 | 2193.2 | R  | 175.1  |        | 158.1  |        | 1  |

Gene symbol: Dock7

Protein name: Isoform 2 of Deducator of cytokinesis protein 7

Protein accession numbers: IPI00339428,IPI00816914,IPI00828891

Peptide sequence: (R)IGDMRIMENNLESELK(S)

Exclusive (unique to this protein): TRUE

SEQUEST XCorr score: 2.02 SEQUEST DCn score: 0.315

Fix modifications: None

Variable modifications: M4: Oxidation (+16.00), M7: Oxidation (+16.00)

charge: 2 Observed m/z: 962.4594

Actual minus calculated peptide mass (AMU): -0.004761

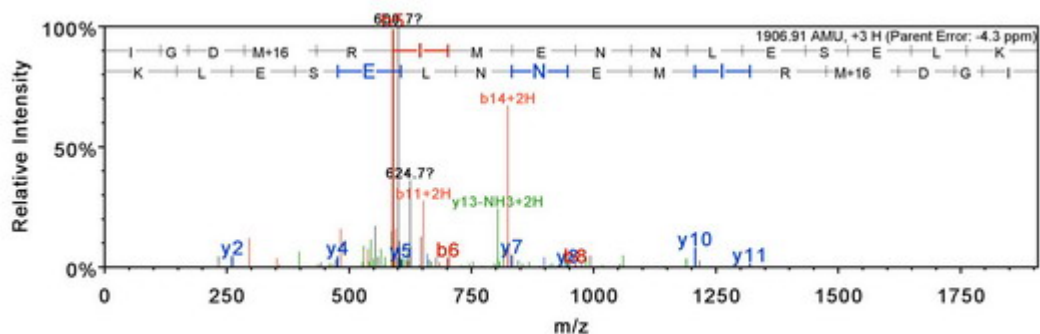

| B  | B Ions | B+2H  | B-NH3  | B-H2O  | AA   | Y Ions | Y+2H  | Y-NH3  | Y-H2O  | Y  |
|----|--------|-------|--------|--------|------|--------|-------|--------|--------|----|
| 1  | 114.1  |       |        |        | I    | 1907.9 | 954.5 | 1890.9 | 1889.9 | 16 |
| 2  | 171.1  |       |        |        | G    | 1794.8 | 897.9 | 1777.8 | 1776.8 | 15 |
| 3  | 286.1  |       |        | 268.1  | D    | 1737.8 | 869.4 | 1720.8 | 1719.8 | 14 |
| 4  | 433.2  |       |        | 415.2  | M+16 | 1622.8 | 811.9 | 1605.8 | 1604.8 | 13 |
| 5  | 589.3  | 295.1 | 572.3  | 571.3  | R    | 1475.8 | 738.4 | 1458.7 | 1457.7 | 12 |
| 6  | 702.4  | 351.7 | 685.3  | 684.4  | I    | 1319.7 | 660.3 | 1302.6 | 1301.6 | 11 |
| 7  | 833.4  | 417.2 | 816.4  | 815.4  | M    | 1206.6 | 603.8 | 1189.5 | 1188.6 | 10 |
| 8  | 962.4  | 481.7 | 945.4  | 944.4  | E    | 1075.5 | 538.3 | 1058.5 | 1057.5 | 9  |
| 9  | 1076.5 | 538.8 | 1059.5 | 1058.5 | N    | 946.5  | 473.8 | 929.5  | 928.5  | 8  |
| 10 | 1190.5 | 595.8 | 1173.5 | 1172.5 | N    | 832.4  | 416.7 | 815.4  | 814.4  | 7  |
| 11 | 1303.6 | 652.3 | 1286.6 | 1285.6 | L    | 718.4  | 359.7 | 701.4  | 700.4  | 6  |
| 12 | 1432.7 | 716.8 | 1415.6 | 1414.7 | E    | 605.3  |       | 588.3  | 587.3  | 5  |
| 13 | 1519.7 | 760.4 | 1502.7 | 1501.7 | S    | 476.3  |       | 459.3  | 458.3  | 4  |
| 14 | 1648.7 | 824.9 | 1631.7 | 1630.7 | E    | 389.2  |       | 372.2  | 371.2  | 3  |
| 15 | 1761.8 | 881.4 | 1744.8 | 1743.8 | L    | 260.2  |       | 243.2  |        | 2  |
| 16 | 1907.9 | 954.5 | 1890.9 | 1889.9 | K    | 147.1  |       | 130.1  |        | 1  |

Gene symbol: Dpm1

Protein name: Dolichol-phosphate mannosyltransferase

Protein accession numbers: IPI00115668,IPI00751087

Peptide sequence: (R)EVAEQLAEIYGPD(R)

Exclusive (unique to this protein): TRUE

SEQUEST XCorr score: 2.2 SEQUEST DCn score: 0.608

Fix modifications: None

Variable modifications: None

charge: 2

Observed m/z: 795.3901

Actual minus calculated peptide mass (AMU): -0.0089149

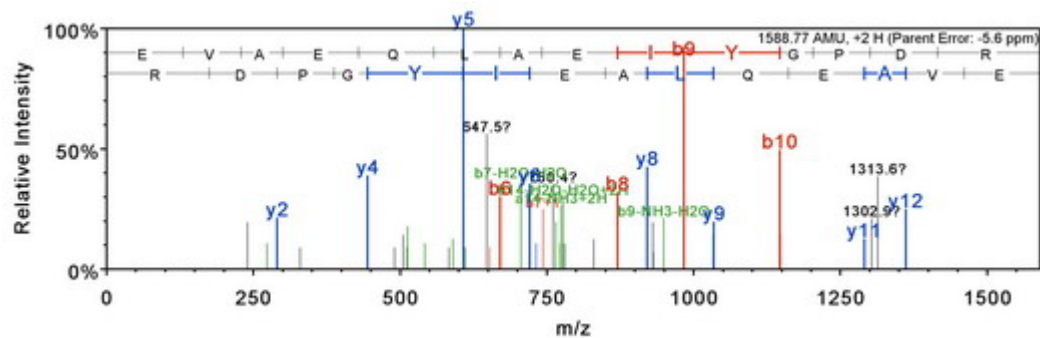

| B  | B ions | B+2H  | B-NH3  | B-H2O  | A,A | Y ions | Y+2H  | Y-NH3  | Y-H2O  | Y  |
|----|--------|-------|--------|--------|-----|--------|-------|--------|--------|----|
| 1  | 130.1  |       |        | 112.0  | E   | 1589.8 | 795.4 | 1572.8 | 1571.8 | 14 |
| 2  | 229.1  |       |        | 211.1  | V   | 1460.7 | 730.9 | 1443.7 | 1442.7 | 13 |
| 3  | 300.2  |       |        | 282.2  | A   | 1361.7 | 681.3 | 1344.6 | 1343.7 | 12 |
| 4  | 429.2  |       |        | 411.2  | E   | 1290.6 | 645.8 | 1273.6 | 1272.6 | 11 |
| 5  | 557.3  |       | 540.2  | 539.3  | Q   | 1161.6 | 581.3 | 1144.6 | 1143.6 | 10 |
| 6  | 670.3  | 335.7 | 653.3  | 652.3  | L   | 1033.5 | 517.3 | 1016.5 | 1015.5 | 9  |
| 7  | 741.4  | 371.2 | 724.4  | 723.4  | A   | 920.5  | 460.7 | 903.4  | 902.4  | 8  |
| 8  | 870.4  | 435.7 | 853.4  | 852.4  | E   | 849.4  | 425.2 | 832.4  | 831.4  | 7  |
| 9  | 983.5  | 492.3 | 966.5  | 965.5  | I   | 720.4  | 360.7 | 703.3  | 702.4  | 6  |
| 10 | 1146.6 | 573.8 | 1129.5 | 1128.6 | Y   | 607.3  |       | 590.3  | 589.3  | 5  |
| 11 | 1203.6 | 602.3 | 1186.6 | 1185.6 | G   | 444.2  |       | 427.2  | 426.2  | 4  |
| 12 | 1300.6 | 650.8 | 1283.6 | 1282.6 | P   | 387.2  |       | 370.2  | 369.2  | 3  |
| 13 | 1415.7 | 708.3 | 1398.6 | 1397.7 | D   | 290.2  |       | 273.1  | 272.1  | 2  |
| 14 | 1589.8 | 795.4 | 1572.8 | 1571.8 | R   | 175.1  |       | 158.1  |        | 1  |

Gene symbol: Dstn

Protein name: Dextrin

Protein accession numbers: IPI00127942

Peptide sequence: (R)YALYDASFETK(E)

Exclusive (unique to this protein): TRUE

SEQUEST XCorr score: 2.54 SEQUEST DCn score: 0.613

Fix modifications: None

Variable modifications: None

charge: 2 Observed m/z: 654.3118

Actual minus calculated peptide mass (AMU): -0.0002441

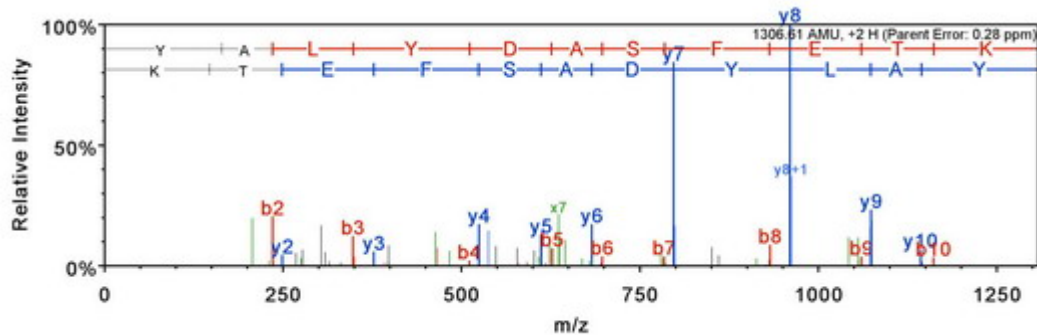

| B  | B ions | B+2H  | B-NH3  | B-H2O  | A,A | Y ions | Y+2H  | Y-NH3  | Y-H2O  | Y  |
|----|--------|-------|--------|--------|-----|--------|-------|--------|--------|----|
| 1  | 164.1  |       |        |        | Y   | 1307.6 | 654.3 | 1290.6 | 1289.6 | 11 |
| 2  | 235.1  |       |        |        | A   | 1144.5 | 572.8 | 1127.5 | 1126.5 | 10 |
| 3  | 348.2  |       |        |        | L   | 1073.5 | 537.3 | 1056.5 | 1055.5 | 9  |
| 4  | 511.3  |       |        |        | Y   | 960.4  | 480.7 | 943.4  | 942.4  | 8  |
| 5  | 626.3  |       |        | 608.3  | D   | 797.4  | 399.2 | 780.3  | 779.4  | 7  |
| 6  | 697.3  | 349.2 |        | 679.3  | A   | 682.3  | 341.7 | 665.3  | 664.3  | 6  |
| 7  | 784.4  | 392.7 |        | 766.3  | S   | 611.3  |       | 594.3  | 593.3  | 5  |
| 8  | 931.4  | 466.2 |        | 913.4  | F   | 524.3  |       | 507.3  | 506.3  | 4  |
| 9  | 1060.5 | 530.7 |        | 1042.5 | E   | 377.2  |       | 360.2  | 359.2  | 3  |
| 10 | 1161.5 | 581.3 |        | 1143.5 | T   | 248.2  |       | 231.1  | 230.2  | 2  |
| 11 | 1307.6 | 654.3 | 1290.6 | 1289.6 | K   | 147.1  |       | 130.1  |        | 1  |

Gene symbol: Dtymk

Protein name: Isoform Long of Thymidylate kinase

Protein accession numbers: IPI00130997,IPI00230524,IPI00831272

Peptide sequence: (R)GALIVLEGVDR(A)

Exclusive (unique to this protein): TRUE

SEQUEST XCorr score: 2.16 SEQUEST DCn score: 0.534

Fix modifications: None

Variable modifications: None

charge: 2

Observed m/z: 571.3302

Actual minus calculated peptide mass (AMU): -0.005737

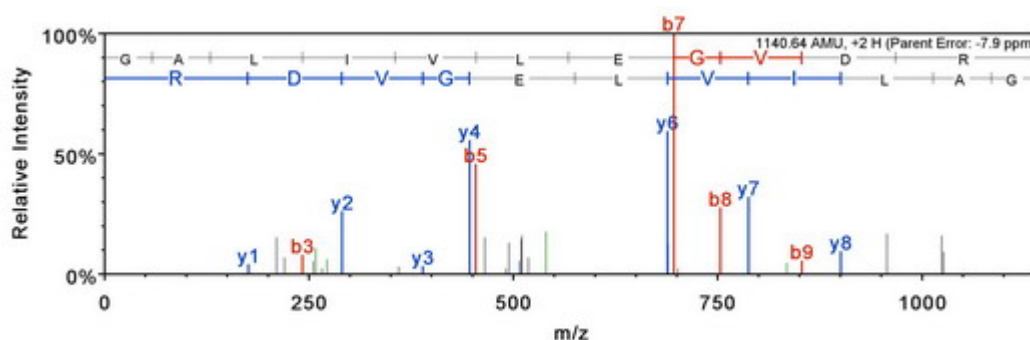

| B  | B ions | B+2H  | B-NH3  | B-H2O  | A.A | Y ions | Y+2H  | Y-NH3  | Y-H2O  | Y  |
|----|--------|-------|--------|--------|-----|--------|-------|--------|--------|----|
| 1  | 58.0   |       |        |        | G   | 1141.7 | 571.3 | 1124.6 | 1123.7 | 11 |
| 2  | 129.1  |       |        |        | A   | 1084.6 | 542.8 | 1067.6 | 1066.6 | 10 |
| 3  | 242.2  |       |        |        | L   | 1013.6 | 507.3 | 996.6  | 995.6  | 9  |
| 4  | 355.2  |       |        |        | I   | 900.5  | 450.8 | 883.5  | 882.5  | 8  |
| 5  | 454.3  |       |        |        | V   | 787.4  | 394.2 | 770.4  | 769.4  | 7  |
| 6  | 567.4  | 284.2 |        |        | L   | 688.4  | 344.7 | 671.3  | 670.4  | 6  |
| 7  | 696.4  | 348.7 |        | 678.4  | E   | 575.3  |       | 558.3  | 557.3  | 5  |
| 8  | 753.5  | 377.2 |        | 735.4  | G   | 446.2  |       | 429.2  | 428.2  | 4  |
| 9  | 852.5  | 426.8 |        | 834.5  | V   | 389.2  |       | 372.2  | 371.2  | 3  |
| 10 | 967.6  | 484.3 |        | 949.5  | D   | 290.2  |       | 273.1  | 272.1  | 2  |
| 11 | 1141.7 | 571.3 | 1124.6 | 1123.7 | R   | 175.1  |       | 158.1  |        | 1  |

Gene symbol: Dus3l

Protein name: Isoform 1 of tRNA-dihydrouridine synthase 3-like

Protein accession numbers: IPI00129184

#NAME?

Exclusive (unique to this protein): TRUE

SEQUEST XCorr score: 2.01 SEQUEST DCn score: 0.702

Fix modifications: C19: Carbamidomethyl (+57.02) Variable modifications: M1: Oxidation (+16.00)

charge: 2

Observed m/z: 992.9106

Actual minus calculated peptide mass (AMU): 0.01575

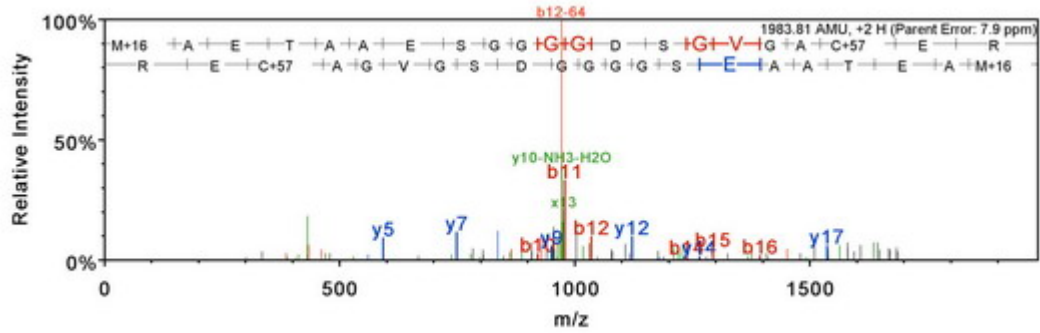

| B  | B Ions | B+2H  | B-NH3  | B-H2O  | AA   | Y Ions | Y+2H  | Y-NH3  | Y-H2O  | Y  |
|----|--------|-------|--------|--------|------|--------|-------|--------|--------|----|
| 1  | 148.0  |       |        |        | M+16 | 1984.8 | 992.9 | 1967.8 | 1966.8 | 21 |
| 2  | 219.1  |       |        |        | A    | 1837.8 | 919.4 | 1820.7 | 1819.8 | 20 |
| 3  | 348.1  |       |        | 330.1  | E    | 1766.7 | 883.9 | 1749.7 | 1748.7 | 19 |
| 4  | 449.2  |       |        | 431.2  | T    | 1637.7 | 819.4 | 1620.7 | 1619.7 | 18 |
| 5  | 520.2  |       |        | 502.2  | A    | 1536.6 | 768.8 | 1519.6 | 1518.6 | 17 |
| 6  | 591.2  | 296.1 |        | 573.2  | A    | 1465.6 | 733.3 | 1448.6 | 1447.6 | 16 |
| 7  | 720.3  | 360.7 |        | 702.3  | E    | 1394.6 | 697.8 | 1377.5 | 1376.5 | 15 |
| 8  | 807.3  | 404.2 |        | 789.3  | S    | 1265.5 | 633.3 | 1248.5 | 1247.5 | 14 |
| 9  | 864.3  | 432.7 |        | 846.3  | G    | 1178.5 | 589.8 | 1161.5 | 1160.5 | 13 |
| 10 | 921.4  | 461.2 |        | 903.4  | G    | 1121.5 | 561.2 | 1104.4 | 1103.5 | 12 |
| 11 | 978.4  | 489.7 |        | 960.4  | G    | 1064.4 | 532.7 | 1047.4 | 1046.4 | 11 |
| 12 | 1035.4 | 518.2 |        | 1017.4 | G    | 1007.4 | 504.2 | 990.4  | 989.4  | 10 |
| 13 | 1150.4 | 575.7 |        | 1132.4 | D    | 950.4  | 475.7 | 933.4  | 932.4  | 9  |
| 14 | 1237.5 | 619.2 |        | 1219.5 | S    | 835.4  | 418.2 | 818.4  | 817.4  | 8  |
| 15 | 1294.5 | 647.8 |        | 1276.5 | G    | 748.3  | 374.7 | 731.3  | 730.3  | 7  |
| 16 | 1393.5 | 697.3 |        | 1375.5 | V    | 691.3  | 346.2 | 674.3  | 673.3  | 6  |
| 17 | 1450.6 | 725.8 |        | 1432.6 | G    | 592.3  |       | 575.2  | 574.2  | 5  |
| 18 | 1521.6 | 761.3 |        | 1503.6 | A    | 535.2  |       | 518.2  | 517.2  | 4  |
| 19 | 1681.6 | 841.3 |        | 1663.6 | C+57 | 464.2  |       | 447.2  | 446.2  | 3  |
| 20 | 1810.7 | 905.9 |        | 1792.7 | E    | 304.2  |       | 287.1  | 286.2  | 2  |
| 21 | 1984.8 | 992.9 | 1967.8 | 1966.8 | R    | 175.1  |       | 158.1  |        | 1  |

Gene symbol: Dynl1l

Protein name: Dynein light chain 1, cytoplasmic

Protein accession numbers: IPI00121623,IPI00381660

Peptide sequence: (K)YNPTWHCIVGR(N)

Exclusive (unique to this protein): TRUE

SEQUEST XCorr score: 2.31 SEQUEST DCn score: 0.634

Fix modifications: C7: Carbamidomethyl (+57.02)Variable modifications: None

charge: 2

Observed m/z: 701.8393

Actual minus calculated peptide mass (AMU): 0.001709



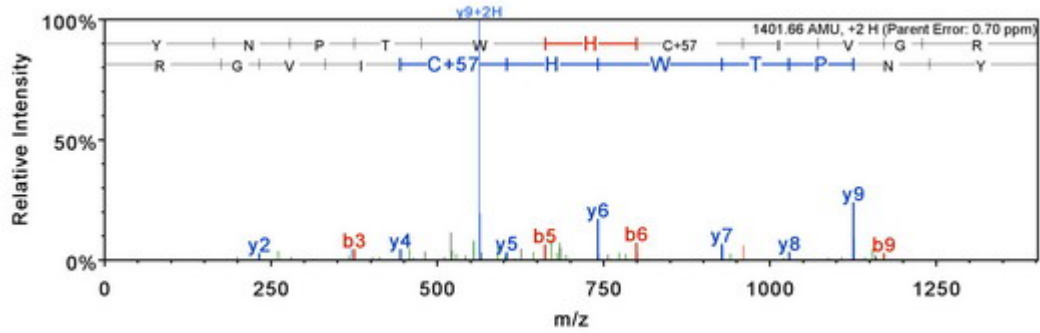

| B  | B ions | B+2H  | B-NH3  | B-H2O  | AA   | Y ions | Y+2H  | Y-NH3  | Y-H2O  | Y  |
|----|--------|-------|--------|--------|------|--------|-------|--------|--------|----|
| 1  | 164.1  |       |        |        | Y    | 1402.7 | 701.8 | 1385.6 | 1384.7 | 11 |
| 2  | 278.1  |       | 261.1  |        | N    | 1239.6 | 620.3 | 1222.6 | 1221.6 | 10 |
| 3  | 375.2  |       | 358.1  |        | P    | 1125.6 | 563.3 | 1108.5 | 1107.5 | 9  |
| 4  | 476.2  |       | 459.2  | 458.2  | T    | 1028.5 | 514.8 | 1011.5 | 1010.5 | 8  |
| 5  | 662.3  |       | 645.3  | 644.3  | W    | 927.5  | 464.2 | 910.4  |        | 7  |
| 6  | 799.4  | 400.2 | 782.3  | 781.3  | H    | 741.4  | 371.2 | 724.4  |        | 6  |
| 7  | 959.4  | 480.2 | 942.4  | 941.4  | C+57 | 604.3  |       | 587.3  |        | 5  |
| 8  | 1072.5 | 536.7 | 1055.4 | 1054.5 | I    | 444.3  |       | 427.3  |        | 4  |
| 9  | 1171.5 | 586.3 | 1154.5 | 1153.5 | V    | 331.2  |       | 314.2  |        | 3  |
| 10 | 1228.6 | 614.8 | 1211.5 | 1210.5 | G    | 232.1  |       | 215.1  |        | 2  |
| 11 | 1402.7 | 701.8 | 1385.6 | 1384.7 | R    | 175.1  |       | 158.1  |        | 1  |

Gene symbol: E330021D16Rik

Protein name: In vitro fertilized eggs cDNA, RIKEN full-length enriched library, clone:7420462M15 product:similar to NICE-5 protein, full insert sequence

Protein accession numbers: IPI00226065

Peptide sequence: (R)FGVDNHYTEQVAR(R)

Exclusive (unique to this protein): TRUE

SEQUEST XCorr score: 2.05 SEQUEST DCn score: 0.471

Fix modifications: None

Variable modifications: None

charge: 2

Observed m/z: 768.3669

Actual minus calculated peptide mass (AMU): 0.001831

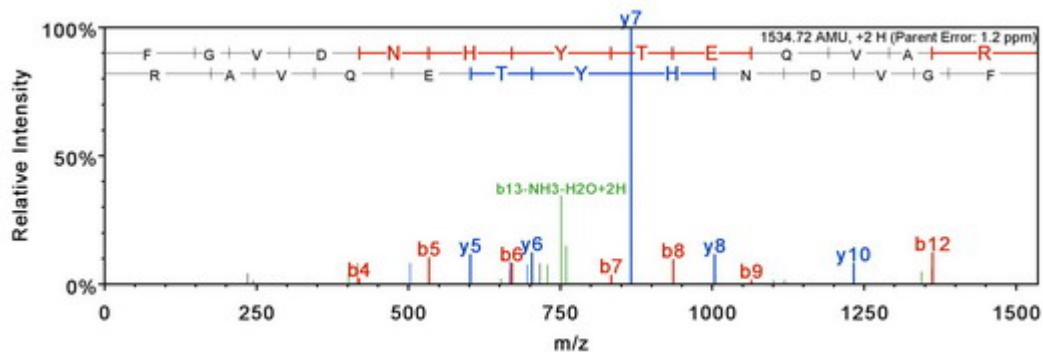

| B  | B Ions | B+2H  | B-NH3  | B-H2O  | A,A | Y Ions | Y+2H  | Y-NH3  | Y-H2O  | Y  |
|----|--------|-------|--------|--------|-----|--------|-------|--------|--------|----|
| 1  | 148.1  |       |        |        | F   | 1535.7 | 768.4 | 1518.7 | 1517.7 | 13 |
| 2  | 205.1  |       |        |        | G   | 1388.7 | 694.8 | 1371.6 | 1370.7 | 12 |
| 3  | 304.2  |       |        |        | V   | 1331.6 | 666.3 | 1314.6 | 1313.6 | 11 |
| 4  | 419.2  |       |        | 401.2  | D   | 1232.6 | 616.8 | 1215.5 | 1214.6 | 10 |
| 5  | 533.2  |       | 516.2  | 515.2  | N   | 1117.5 | 559.3 | 1100.5 | 1099.5 | 9  |
| 6  | 670.3  | 335.7 | 653.3  | 652.3  | H   | 1003.5 | 502.3 | 986.5  | 985.5  | 8  |
| 7  | 833.4  | 417.2 | 816.3  | 815.4  | Y   | 866.4  | 433.7 | 849.4  | 848.4  | 7  |
| 8  | 934.4  | 467.7 | 917.4  | 916.4  | T   | 703.4  | 352.2 | 686.4  | 685.4  | 6  |
| 9  | 1063.5 | 532.2 | 1046.4 | 1045.4 | E   | 602.3  |       | 585.3  | 584.3  | 5  |
| 10 | 1191.5 | 596.3 | 1174.5 | 1173.5 | Q   | 473.3  |       | 456.3  |        | 4  |
| 11 | 1290.6 | 645.8 | 1273.5 | 1272.6 | V   | 345.2  |       | 328.2  |        | 3  |
| 12 | 1361.6 | 681.3 | 1344.6 | 1343.6 | A   | 246.2  |       | 229.1  |        | 2  |
| 13 | 1535.7 | 768.4 | 1518.7 | 1517.7 | R   | 175.1  |       | 158.1  |        | 1  |

Gene symbol: Echdc3

Protein name: Enoyl Coenzyme A hydratase domain containing 3

Protein accession numbers: IPI00318283

Peptide sequence: (K)SSFATPGVNVGLFCSTPAVALGR(A)

Exclusive (unique to this protein): TRUE

SEQUEST XCorr score: 2.46 SEQUEST DCn score: 0.646

Fix modifications: C14: Carbamidomethyl (+57.02) Variable modifications: None

charge: 2

Observed m/z: 1154.5885

Actual minus calculated peptide mass (AMU): -0.006836

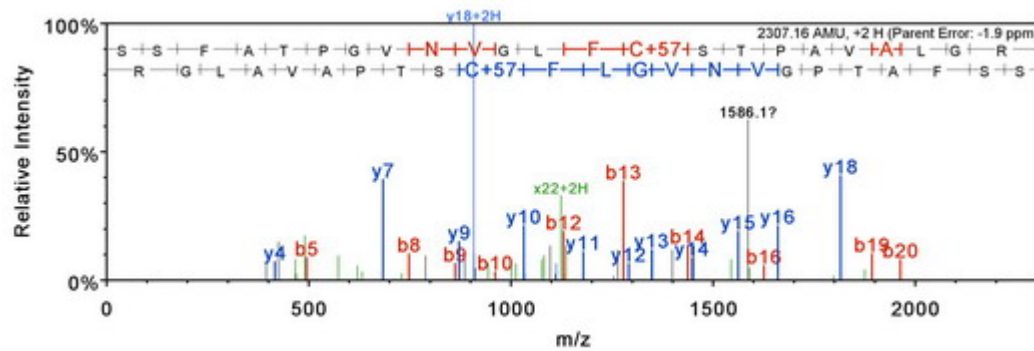

| B  | B Ions | B+2H   | B-NH3  | B-H2O  | AA   | Y Ions | Y+2H   | Y-NH3  | Y-H2O  | Y  |
|----|--------|--------|--------|--------|------|--------|--------|--------|--------|----|
| 1  | 88.0   |        |        | 70.0   | S    | 2308.2 | 1154.6 | 2291.2 | 2290.2 | 23 |
| 2  | 175.1  |        |        | 157.1  | S    | 2221.1 | 1111.1 | 2204.1 | 2203.1 | 22 |
| 3  | 322.1  |        |        | 304.1  | F    | 2134.1 | 1067.6 | 2117.1 | 2116.1 | 21 |
| 4  | 393.2  |        |        | 375.2  | A    | 1987.0 | 994.0  | 1970.0 | 1969.0 | 20 |
| 5  | 494.2  |        |        | 476.2  | T    | 1916.0 | 958.5  | 1899.0 | 1898.0 | 19 |
| 6  | 591.3  | 296.1  |        | 573.3  | P    | 1815.0 | 908.0  | 1797.9 | 1797.0 | 18 |
| 7  | 648.3  | 324.7  |        | 630.3  | G    | 1717.9 | 859.5  | 1700.9 | 1699.9 | 17 |
| 8  | 747.4  | 374.2  |        | 729.4  | V    | 1660.9 | 831.0  | 1643.9 | 1642.9 | 16 |
| 9  | 861.4  | 431.2  | 844.4  | 843.4  | N    | 1561.8 | 781.4  | 1544.8 | 1543.8 | 15 |
| 10 | 960.5  | 480.7  | 943.5  | 942.5  | V    | 1447.8 | 724.4  | 1430.8 | 1429.8 | 14 |
| 11 | 1017.5 | 509.3  | 1000.5 | 999.5  | G    | 1348.7 | 674.9  | 1331.7 | 1330.7 | 13 |
| 12 | 1130.6 | 565.8  | 1113.6 | 1112.6 | L    | 1291.7 | 646.4  | 1274.7 | 1273.7 | 12 |
| 13 | 1277.7 | 639.3  | 1260.6 | 1259.6 | F    | 1178.6 | 589.8  | 1161.6 | 1160.6 | 11 |
| 14 | 1437.7 | 719.4  | 1420.7 | 1419.7 | C+57 | 1031.5 | 516.3  | 1014.5 | 1013.5 | 10 |
| 15 | 1524.7 | 762.9  | 1507.7 | 1506.7 | S    | 871.5  | 436.3  | 854.5  | 853.5  | 9  |
| 16 | 1625.8 | 813.4  | 1608.7 | 1607.8 | T    | 784.5  | 392.7  | 767.4  | 766.5  | 8  |
| 17 | 1722.8 | 861.9  | 1705.8 | 1704.8 | P    | 683.4  | 342.2  | 666.4  |        | 7  |
| 18 | 1793.9 | 897.4  | 1776.8 | 1775.8 | A    | 586.4  | 293.7  | 569.3  |        | 6  |
| 19 | 1892.9 | 947.0  | 1875.9 | 1874.9 | V    | 515.3  |        | 498.3  |        | 5  |
| 20 | 1964.0 | 982.5  | 1946.9 | 1946.0 | A    | 416.3  |        | 399.2  |        | 4  |
| 21 | 2077.0 | 1039.0 | 2060.0 | 2059.0 | L    | 345.2  |        | 328.2  |        | 3  |
| 22 | 2134.1 | 1067.5 | 2117.0 | 2116.1 | G    | 232.1  |        | 215.1  |        | 2  |
| 23 | 2308.2 | 1154.6 | 2291.2 | 2290.2 | R    | 175.1  |        | 158.1  |        | 1  |

Gene symbol: Echs1

Protein name: Enoyl-CoA hydratase, mitochondrial precursor

Protein accession numbers: IPI00454049

Peptide sequence: (K)AQFGQPEILLGTIPGAGGTQR(L)

Exclusive (unique to this protein): TRUE

SEQUEST XCorr score: 2.02 SEQUEST DCn score: 0.521

Fix modifications: None

Variable modifications: None

charge: 2

Observed m/z: 1056.0692

Actual minus calculated peptide mass (AMU): 0.005127

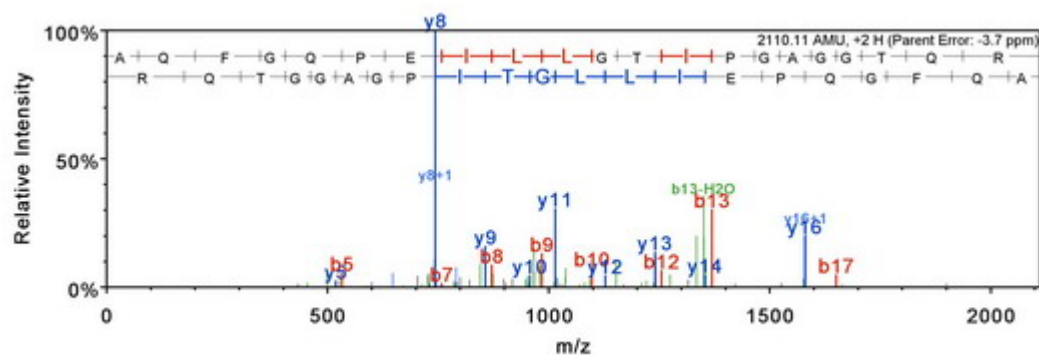

| B  | B Ions | B+2H   | B-NH3  | B-H2O  | AA | Y Ions | Y+2H   | Y-NH3  | Y-H2O  | Y  |
|----|--------|--------|--------|--------|----|--------|--------|--------|--------|----|
| 1  | 72.0   |        |        |        | A  | 2111.1 | 1056.1 | 2094.1 | 2093.1 | 21 |
| 2  | 200.1  |        | 183.1  |        | Q  | 2040.1 | 1020.6 | 2023.1 | 2022.1 | 20 |
| 3  | 347.2  |        | 330.2  |        | F  | 1912.0 | 956.5  | 1895.0 | 1894.0 | 19 |
| 4  | 404.2  |        | 387.2  |        | G  | 1765.0 | 883.0  | 1747.9 | 1747.0 | 18 |
| 5  | 532.3  |        | 515.2  |        | Q  | 1707.9 | 854.5  | 1690.9 | 1689.9 | 17 |
| 6  | 629.3  | 315.2  | 612.3  |        | P  | 1579.9 | 790.4  | 1562.9 | 1561.9 | 16 |
| 7  | 758.4  | 379.7  | 741.3  | 740.3  | E  | 1482.8 | 741.9  | 1465.8 | 1464.8 | 15 |
| 8  | 871.4  | 436.2  | 854.4  | 853.4  | I  | 1353.8 | 677.4  | 1336.8 | 1335.8 | 14 |
| 9  | 984.5  | 492.8  | 967.5  | 966.5  | L  | 1240.7 | 620.9  | 1223.7 | 1222.7 | 13 |
| 10 | 1097.6 | 549.3  | 1080.6 | 1079.6 | L  | 1127.6 | 564.3  | 1110.6 | 1109.6 | 12 |
| 11 | 1154.6 | 577.8  | 1137.6 | 1136.6 | G  | 1014.5 | 507.8  | 997.5  | 996.5  | 11 |
| 12 | 1255.7 | 628.3  | 1238.6 | 1237.7 | T  | 957.5  | 479.3  | 940.5  | 939.5  | 10 |
| 13 | 1368.8 | 684.9  | 1351.7 | 1350.7 | I  | 856.5  | 428.7  | 839.4  | 838.5  | 9  |
| 14 | 1465.8 | 733.4  | 1448.8 | 1447.8 | P  | 743.4  | 372.2  | 726.4  | 725.4  | 8  |
| 15 | 1522.8 | 761.9  | 1505.8 | 1504.8 | G  | 646.3  | 323.7  | 629.3  | 628.3  | 7  |
| 16 | 1593.9 | 797.4  | 1576.8 | 1575.9 | A  | 589.3  | 295.2  | 572.3  | 571.3  | 6  |
| 17 | 1650.9 | 826.0  | 1633.9 | 1632.9 | G  | 518.3  |        | 501.2  | 500.3  | 5  |
| 18 | 1707.9 | 854.5  | 1690.9 | 1689.9 | G  | 461.3  |        | 444.2  | 443.2  | 4  |
| 19 | 1809.0 | 905.0  | 1791.9 | 1790.9 | T  | 404.2  |        | 387.2  | 386.2  | 3  |
| 20 | 1937.0 | 969.0  | 1920.0 | 1919.0 | Q  | 303.2  |        | 286.2  |        | 2  |
| 21 | 2111.1 | 1056.1 | 2094.1 | 2093.1 | R  | 175.1  |        | 158.1  |        | 1  |

Gene symbol: Edc4

Protein name: Isoform 1 of Enhancer of mRNA-decapping protein 4

Protein accession numbers: IPI00330066,IPI00831141

Peptide sequence: (R)QGPELGSQGLDGGPGDGDR(H)

Exclusive (unique to this protein): TRUE

SEQUEST XCorr score: 2 SEQUEST DCn score: 0.642

Fix modifications: None

Variable modifications: None

charge: 2 Observed m/z: 962.9507

Actual minus calculated peptide mass (AMU): -0.006958

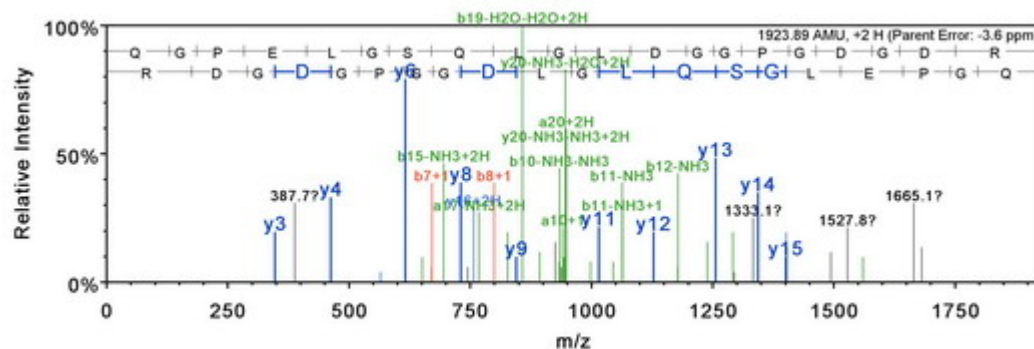

| B  | B Ions | B+2H  | B-NH3  | B-H2O  | AA | Y Ions | Y+2H  | Y-NH3  | Y-H2O  | Y  |
|----|--------|-------|--------|--------|----|--------|-------|--------|--------|----|
| 1  | 129.1  |       | 112.0  |        | Q  | 1924.9 | 963.0 | 1907.9 | 1906.9 | 20 |
| 2  | 186.1  |       | 169.1  |        | G  | 1796.8 | 898.9 | 1779.8 | 1778.8 | 19 |
| 3  | 283.1  |       | 266.1  |        | P  | 1739.8 | 870.4 | 1722.8 | 1721.8 | 18 |
| 4  | 412.2  |       | 395.2  | 394.2  | E  | 1642.8 | 821.9 | 1625.7 | 1624.8 | 17 |
| 5  | 525.3  |       | 508.2  | 507.3  | L  | 1513.7 | 757.4 | 1496.7 | 1495.7 | 16 |
| 6  | 582.3  | 291.7 | 565.3  | 564.3  | G  | 1400.6 | 700.8 | 1383.6 | 1382.6 | 15 |
| 7  | 669.3  | 335.2 | 652.3  | 651.3  | S  | 1343.6 | 672.3 | 1326.6 | 1325.6 | 14 |
| 8  | 797.4  | 399.2 | 780.4  | 779.4  | Q  | 1256.6 | 628.8 | 1239.6 | 1238.6 | 13 |
| 9  | 910.5  | 455.7 | 893.4  | 892.5  | L  | 1128.5 | 564.8 | 1111.5 | 1110.5 | 12 |
| 10 | 967.5  | 484.3 | 950.5  | 949.5  | G  | 1015.4 | 508.2 | 998.4  | 997.4  | 11 |
| 11 | 1080.6 | 540.8 | 1063.5 | 1062.6 | L  | 958.4  | 479.7 | 941.4  | 940.4  | 10 |
| 12 | 1195.6 | 598.3 | 1178.6 | 1177.6 | D  | 845.3  | 423.2 | 828.3  | 827.3  | 9  |
| 13 | 1252.6 | 626.8 | 1235.6 | 1234.6 | G  | 730.3  | 365.7 | 713.3  | 712.3  | 8  |
| 14 | 1309.6 | 655.3 | 1292.6 | 1291.6 | G  | 673.3  | 337.2 | 656.3  | 655.3  | 7  |
| 15 | 1406.7 | 703.9 | 1389.7 | 1388.7 | P  | 616.3  | 308.6 | 599.2  | 598.3  | 6  |
| 16 | 1463.7 | 732.4 | 1446.7 | 1445.7 | G  | 519.2  |       | 502.2  | 501.2  | 5  |
| 17 | 1578.7 | 789.9 | 1561.7 | 1560.7 | D  | 462.2  |       | 445.2  | 444.2  | 4  |
| 18 | 1635.8 | 818.4 | 1618.7 | 1617.8 | G  | 347.2  |       | 330.1  | 329.2  | 3  |
| 19 | 1750.8 | 875.9 | 1733.8 | 1732.8 | D  | 290.2  |       | 273.1  | 272.1  | 2  |
| 20 | 1924.9 | 963.0 | 1907.9 | 1906.9 | R  | 175.1  |       | 158.1  |        | 1  |

Gene symbol: EG216818

Protein name: similar to ubiquitin A-52 residue ribosomal protein fusion product 1

Protein accession numbers: IPI00345192,IPI00849015

Peptide sequence: (K)TLTDNTITLEVKPSDTIENVK(D)

Exclusive (unique to this protein): TRUE

SEQUEST XCorr score: 2.83 SEQUEST DCn score: 0.52

Fix modifications: None

Variable modifications: None

charge: 2

Observed m/z: 1166.115

Actual minus calculated peptide mass (AMU): -0.007568

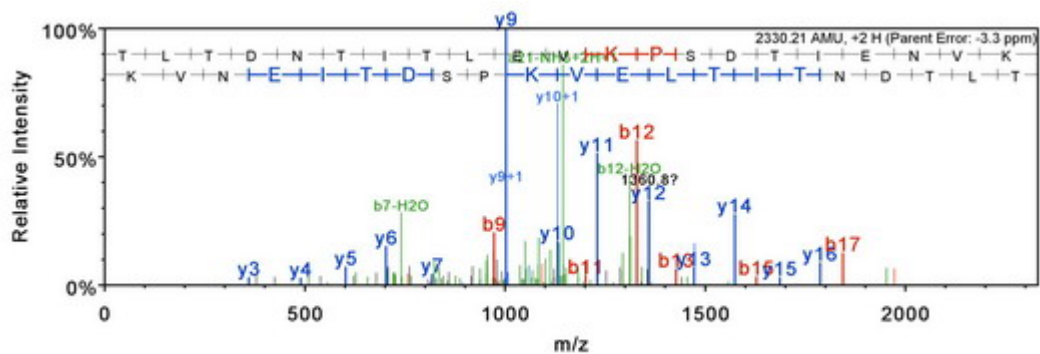

| B  | B Ions | B+2H   | B-NH3  | B-H2O  | AA | Y Ions | Y+2H   | Y-NH3  | Y-H2O  | Y  |
|----|--------|--------|--------|--------|----|--------|--------|--------|--------|----|
| 1  | 102.1  |        |        | 84.0   | T  | 2331.2 | 1166.1 | 2314.2 | 2313.2 | 21 |
| 2  | 215.1  |        |        | 197.1  | L  | 2230.2 | 1115.6 | 2213.2 | 2212.2 | 20 |
| 3  | 316.2  |        |        | 298.2  | T  | 2117.1 | 1059.0 | 2100.1 | 2099.1 | 19 |
| 4  | 431.2  |        |        | 413.2  | D  | 2016.1 | 1008.5 | 1999.0 | 1998.0 | 18 |
| 5  | 545.3  |        | 528.2  | 527.3  | N  | 1901.0 | 951.0  | 1884.0 | 1883.0 | 17 |
| 6  | 646.3  | 323.7  | 629.3  | 628.3  | T  | 1787.0 | 894.0  | 1770.0 | 1769.0 | 16 |
| 7  | 759.4  | 380.2  | 742.4  | 741.4  | I  | 1685.9 | 843.5  | 1668.9 | 1667.9 | 15 |
| 8  | 860.4  | 430.7  | 843.4  | 842.4  | T  | 1572.9 | 786.9  | 1555.8 | 1554.8 | 14 |
| 9  | 973.5  | 487.3  | 956.5  | 955.5  | L  | 1471.8 | 736.4  | 1454.8 | 1453.8 | 13 |
| 10 | 1102.6 | 551.8  | 1085.5 | 1084.5 | E  | 1358.7 | 679.9  | 1341.7 | 1340.7 | 12 |
| 11 | 1201.6 | 601.3  | 1184.6 | 1183.6 | V  | 1229.7 | 615.3  | 1212.7 | 1211.7 | 11 |
| 12 | 1329.7 | 665.4  | 1312.7 | 1311.7 | K  | 1130.6 | 565.8  | 1113.6 | 1112.6 | 10 |
| 13 | 1426.8 | 713.9  | 1409.8 | 1408.8 | P  | 1002.5 | 501.8  | 985.5  | 984.5  | 9  |
| 14 | 1513.8 | 757.4  | 1496.8 | 1495.8 | S  | 905.5  | 453.2  | 888.4  | 887.5  | 8  |
| 15 | 1628.8 | 814.9  | 1611.8 | 1610.8 | D  | 818.4  | 409.7  | 801.4  | 800.4  | 7  |
| 16 | 1729.9 | 865.5  | 1712.9 | 1711.9 | T  | 703.4  | 352.2  | 686.4  | 685.4  | 6  |
| 17 | 1843.0 | 922.0  | 1825.9 | 1825.0 | I  | 602.4  |        | 585.3  | 584.3  | 5  |
| 18 | 1972.0 | 986.5  | 1955.0 | 1954.0 | E  | 489.3  |        | 472.2  | 471.3  | 4  |
| 19 | 2086.1 | 1043.5 | 2069.0 | 2068.1 | N  | 360.2  |        | 343.2  |        | 3  |
| 20 | 2185.1 | 1093.1 | 2168.1 | 2167.1 | V  | 246.2  |        | 229.2  |        | 2  |
| 21 | 2331.2 | 1166.1 | 2314.2 | 2313.2 | K  | 147.1  |        | 130.1  |        | 1  |

Gene symbol: EG233991

Protein name: similar to 60S ribosomal protein L22

Protein accession numbers: IPI00350162,IPI00755995

Peptide sequence: (K)ITVTSEVPFSK(R)

Exclusive (unique to this protein): TRUE

SEQUEST XCorr score: 2.15 SEQUEST DCn score: 0.614

Fix modifications: None

Variable modifications: None

charge: 2

Observed m/z: 604.3331

Actual minus calculated peptide mass (AMU): 0.0008545

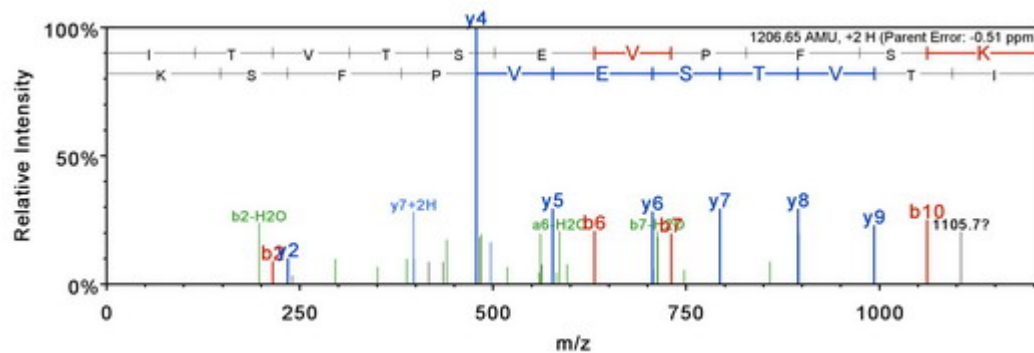

| B  | B Ions | B+2H  | B-NH3  | B-H2O  | AA | Y Ions | Y+2H  | Y-NH3  | Y-H2O  | Y  |
|----|--------|-------|--------|--------|----|--------|-------|--------|--------|----|
| 1  | 114.1  |       |        |        | I  | 1207.7 | 604.3 | 1190.6 | 1189.7 | 11 |
| 2  | 215.1  |       |        | 197.1  | T  | 1094.6 | 547.8 | 1077.5 | 1076.6 | 10 |
| 3  | 314.2  |       |        | 296.2  | V  | 993.5  | 497.3 | 976.5  | 975.5  | 9  |
| 4  | 415.3  |       |        | 397.3  | T  | 894.5  | 447.7 | 877.4  | 876.5  | 8  |
| 5  | 502.3  |       |        | 484.3  | S  | 793.4  | 397.2 | 776.4  | 775.4  | 7  |
| 6  | 631.3  | 316.2 |        | 613.3  | E  | 706.4  | 353.7 | 689.4  | 688.4  | 6  |
| 7  | 730.4  | 365.7 |        | 712.4  | V  | 577.3  |       | 560.3  | 559.3  | 5  |
| 8  | 827.5  | 414.2 |        | 809.4  | P  | 478.3  |       | 461.2  | 460.3  | 4  |
| 9  | 974.5  | 487.8 |        | 956.5  | F  | 381.2  |       | 364.2  | 363.2  | 3  |
| 10 | 1061.5 | 531.3 |        | 1043.5 | S  | 234.2  |       | 217.1  | 216.1  | 2  |
| 11 | 1207.7 | 604.3 | 1190.6 | 1189.7 | K  | 147.1  |       | 130.1  |        | 1  |

Gene symbol: EG243302

Protein name: similar to 40S ribosomal protein S25

Protein accession numbers:  
 IPI00115992,IPI00137735,IPI00461419,IPI00605858,IPI00624402,IPI00625320,IPI00677917,IPI  
 00848593,IPI00850188

Peptide sequence: (R)DKLNNLVLFDK(A)

Exclusive (unique to this protein): TRUE

SEQUEST XCorr score: 2.25 SEQUEST DCn score: 0.488

Fix modifications: None

Variable modifications: None

charge: 2 Observed m/z: 659.8684

Actual minus calculated peptide mass (AMU): -0.008301

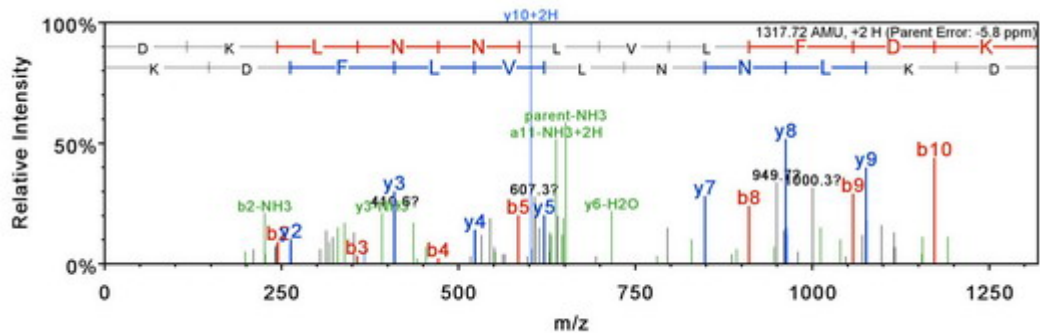

| B  | B Ions | B+2H  | B-NH3  | B-H2O  | AA | Y Ions | Y+2H  | Y-NH3  | Y-H2O  | Y  |
|----|--------|-------|--------|--------|----|--------|-------|--------|--------|----|
| 1  | 116.0  |       |        | 98.0   | D  | 1318.7 | 659.9 | 1301.7 | 1300.7 | 11 |
| 2  | 244.1  | 122.6 | 227.1  | 226.1  | K  | 1203.7 | 602.4 | 1186.7 | 1185.7 | 10 |
| 3  | 357.2  | 179.1 | 340.2  | 339.2  | L  | 1075.6 | 538.3 | 1058.6 | 1057.6 | 9  |
| 4  | 471.3  | 236.1 | 454.2  | 453.3  | N  | 962.5  | 481.8 | 945.5  | 944.5  | 8  |
| 5  | 585.3  | 293.2 | 568.3  | 567.3  | N  | 848.5  | 424.8 | 831.5  | 830.5  | 7  |
| 6  | 698.4  | 349.7 | 681.4  | 680.4  | L  | 734.5  | 367.7 | 717.4  | 716.4  | 6  |
| 7  | 797.5  | 399.2 | 780.4  | 779.4  | V  | 621.4  |       | 604.3  | 603.4  | 5  |
| 8  | 910.5  | 455.8 | 893.5  | 892.5  | L  | 522.3  |       | 505.3  | 504.3  | 4  |
| 9  | 1057.6 | 529.3 | 1040.6 | 1039.6 | F  | 409.2  |       | 392.2  | 391.2  | 3  |
| 10 | 1172.6 | 586.8 | 1155.6 | 1154.6 | D  | 262.1  |       | 245.1  | 244.1  | 2  |
| 11 | 1318.7 | 659.9 | 1301.7 | 1300.7 | K  | 147.1  |       | 130.1  |        | 1  |

Gene symbol: EG432865

Protein name: similar to ribosomal protein S12

Protein accession numbers:

IPI00116908,IPI00225634,IPI00405659,IPI00463049,IPI00463052,IPI00473415,IPI00757455

Peptide sequence: (K)LVEALCAEHQINLIK(A)

Exclusive (unique to this protein): TRUE

SEQUEST XCorr score: 2.06 SEQUEST DCn score: 0.452

Fix modifications: C6: Carbamidomethyl (+57.02) Variable modifications: None

charge: 2

Observed m/z: 875.9774

Actual minus calculated peptide mass (AMU): -0.005859

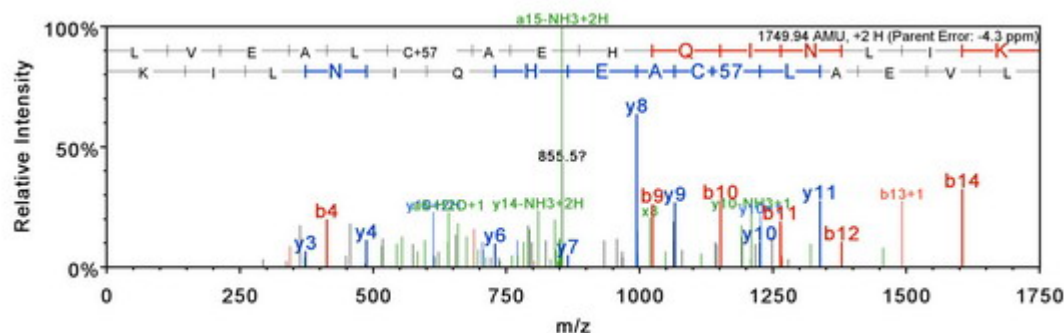

| B  | B ions | B+2H  | B-NH3  | B-H2O  | A,A  | Y ions | Y+2H  | Y-NH3  | Y-H2O  | Y  |
|----|--------|-------|--------|--------|------|--------|-------|--------|--------|----|
| 1  | 114.1  |       |        |        | L    | 1751.0 | 876.0 | 1733.9 | 1732.9 | 15 |
| 2  | 213.2  |       |        |        | V    | 1637.9 | 819.4 | 1620.8 | 1619.9 | 14 |
| 3  | 342.2  |       |        | 324.2  | E    | 1538.8 | 769.9 | 1521.8 | 1520.8 | 13 |
| 4  | 413.2  |       |        | 395.2  | A    | 1409.8 | 705.4 | 1392.7 | 1391.8 | 12 |
| 5  | 526.3  |       |        | 508.3  | L    | 1338.7 | 669.9 | 1321.7 | 1320.7 | 11 |
| 6  | 686.4  | 343.7 |        | 668.3  | C+57 | 1225.6 | 613.3 | 1208.6 | 1207.6 | 10 |
| 7  | 757.4  | 379.2 |        | 739.4  | A    | 1065.6 | 533.3 | 1048.6 | 1047.6 | 9  |
| 8  | 886.4  | 443.7 |        | 868.4  | E    | 994.6  | 497.8 | 977.5  | 976.6  | 8  |
| 9  | 1023.5 | 512.3 |        | 1005.5 | H    | 865.5  | 433.3 | 848.5  |        | 7  |
| 10 | 1151.5 | 576.3 | 1134.5 | 1133.5 | Q    | 728.5  | 364.7 | 711.4  |        | 6  |
| 11 | 1264.6 | 632.8 | 1247.6 | 1246.6 | I    | 600.4  |       | 583.4  |        | 5  |
| 12 | 1378.7 | 689.8 | 1361.7 | 1360.7 | N    | 487.3  |       | 470.3  |        | 4  |
| 13 | 1491.8 | 746.4 | 1474.7 | 1473.8 | L    | 373.3  |       | 356.3  |        | 3  |
| 14 | 1604.9 | 802.9 | 1587.8 | 1586.8 | I    | 260.2  |       | 243.2  |        | 2  |
| 15 | 1751.0 | 876.0 | 1733.9 | 1732.9 | K    | 147.1  |       | 130.1  |        | 1  |

Gene symbol: EG432987

Protein name: Predicted

Protein accession numbers: IPI00330480

Peptide sequence: (R)SLDLDSIIAEVK(A)

Exclusive (unique to this protein): TRUE

SEQUEST XCorr score: 2.04 SEQUEST DCn score: 0.385

Fix modifications: None

Variable modifications: None

charge: 2

Observed m/z: 651.8583



Actual minus calculated peptide mass (AMU): -0.0070758

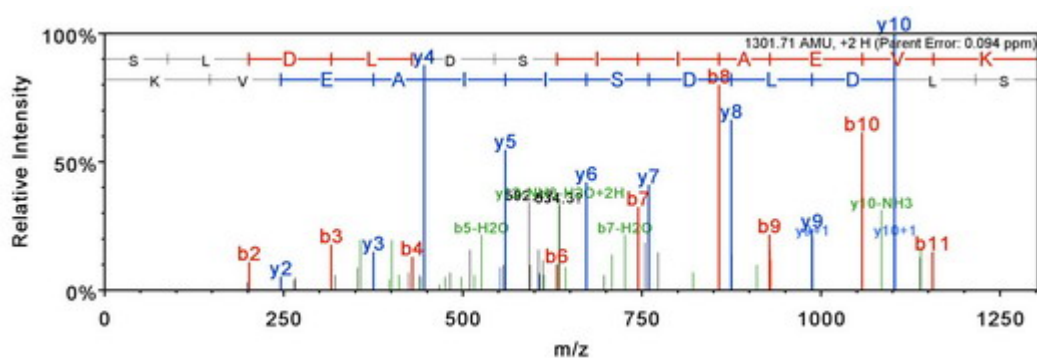

| B  | B ions | B+2H  | B-NH3  | B-H2O  | AA | Y ions | Y+2H  | Y-NH3  | Y-H2O  | Y  |
|----|--------|-------|--------|--------|----|--------|-------|--------|--------|----|
| 1  | 88.0   |       |        | 70.0   | S  | 1302.7 | 651.9 | 1285.7 | 1284.7 | 12 |
| 2  | 201.1  |       |        | 183.1  | L  | 1215.7 | 608.4 | 1198.7 | 1197.7 | 11 |
| 3  | 316.2  |       |        | 298.1  | D  | 1102.6 | 551.8 | 1085.6 | 1084.6 | 10 |
| 4  | 429.2  |       |        | 411.2  | L  | 987.6  | 494.3 | 970.6  | 969.6  | 9  |
| 5  | 544.3  |       |        | 526.3  | D  | 874.5  | 437.8 | 857.5  | 856.5  | 8  |
| 6  | 631.3  | 316.2 |        | 613.3  | S  | 759.5  | 380.2 | 742.4  | 741.5  | 7  |
| 7  | 744.4  | 372.7 |        | 726.4  | I  | 672.4  | 336.7 | 655.4  | 654.4  | 6  |
| 8  | 857.5  | 429.2 |        | 839.5  | I  | 559.4  |       | 542.3  | 541.3  | 5  |
| 9  | 928.5  | 464.8 |        | 910.5  | A  | 446.3  |       | 429.2  | 428.3  | 4  |
| 10 | 1057.5 | 529.3 |        | 1039.5 | E  | 375.2  |       | 358.2  | 357.2  | 3  |
| 11 | 1156.6 | 578.8 |        | 1138.6 | V  | 246.2  |       | 229.2  |        | 2  |
| 12 | 1302.7 | 651.9 | 1285.7 | 1284.7 | K  | 147.1  |       | 130.1  |        | 1  |

Gene symbol: EG545121;LOC672818

Protein name: similar to ribosomal protein S14

Protein accession numbers: IPI00112407,IPI00322562,IPI00663582

Peptide sequence: (R)IEDVTPIPSDSTR(R)

Exclusive (unique to this protein): TRUE

SEQUEST XCorr score: 2.16 SEQUEST DCn score: 0.642

Fix modifications: None

Variable modifications: None

charge: 2

Observed m/z: 715.3625

Actual minus calculated peptide mass (AMU): -0.0003662

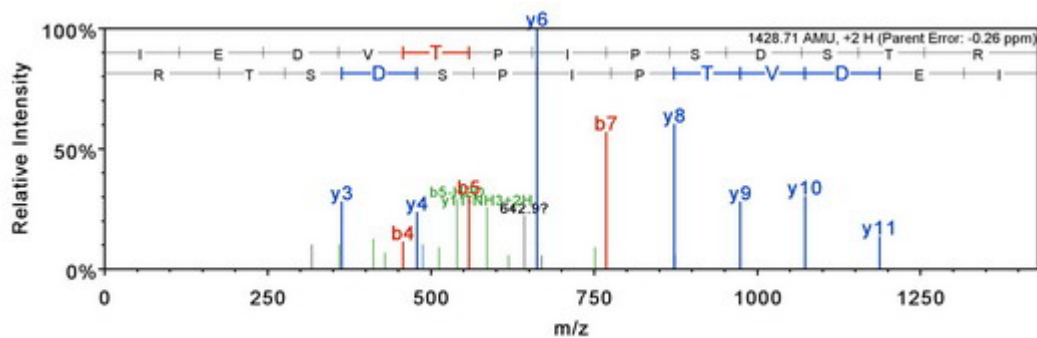

| B  | B Ions | B+2H  | B-NH3  | B-H2O  | A,A | Y Ions | Y+2H  | Y-NH3  | Y-H2O  | Y  |
|----|--------|-------|--------|--------|-----|--------|-------|--------|--------|----|
| 1  | 114.1  |       |        |        | I   | 1429.7 | 715.4 | 1412.7 | 1411.7 | 13 |
| 2  | 243.1  |       |        | 225.1  | E   | 1316.6 | 658.8 | 1299.6 | 1298.6 | 12 |
| 3  | 358.2  |       |        | 340.2  | D   | 1187.6 | 594.3 | 1170.6 | 1169.6 | 11 |
| 4  | 457.2  |       |        | 439.2  | V   | 1072.6 | 536.8 | 1055.5 | 1054.5 | 10 |
| 5  | 558.3  |       |        | 540.3  | T   | 973.5  | 487.3 | 956.5  | 955.5  | 9  |
| 6  | 655.3  | 328.2 |        | 637.3  | P   | 872.5  | 436.7 | 855.4  | 854.4  | 8  |
| 7  | 768.4  | 384.7 |        | 750.4  | I   | 775.4  | 388.2 | 758.4  | 757.4  | 7  |
| 8  | 865.5  | 433.2 |        | 847.5  | P   | 662.3  | 331.7 | 645.3  | 644.3  | 6  |
| 9  | 952.5  | 476.8 |        | 934.5  | S   | 565.3  |       | 548.2  | 547.3  | 5  |
| 10 | 1067.5 | 534.3 |        | 1049.5 | D   | 478.2  |       | 461.2  | 460.2  | 4  |
| 11 | 1154.6 | 577.8 |        | 1136.5 | S   | 363.2  |       | 346.2  | 345.2  | 3  |
| 12 | 1255.6 | 628.3 |        | 1237.6 | T   | 276.2  |       | 259.1  | 258.2  | 2  |
| 13 | 1429.7 | 715.4 | 1412.7 | 1411.7 | R   | 175.1  |       | 158.1  |        | 1  |

Gene symbol: EG626175

Protein name: similar to 40S ribosomal protein S26

Protein accession numbers:

IPI00261455,IPI00377441,IPI00658829,IPI00674601,IPI00754798,IPI00762861

Peptide sequence: (R)DISEASVFDAYVLPK(L)

Exclusive (unique to this protein): TRUE

SEQUEST XCorr score: 2.4 SEQUEST DCn score: 0.615

Fix modifications: None

Variable modifications: None

charge: 2 Observed m/z: 827.4192

Actual minus calculated peptide mass (AMU): -0.0070758

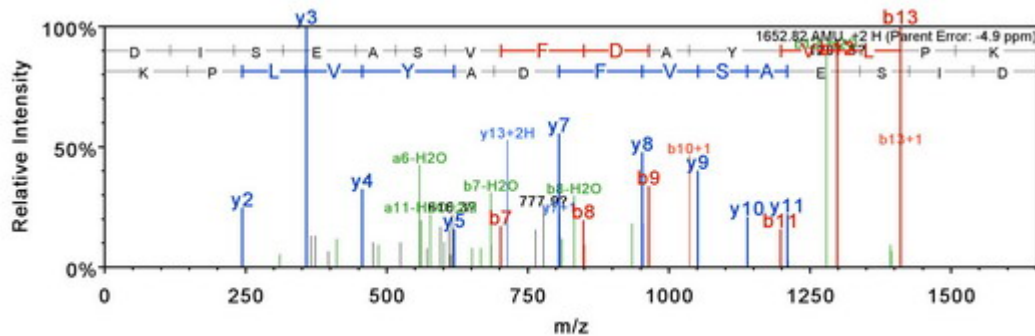

| B  | B lons | B+2H  | B-NH3  | B-H2O  | AA | Y lons | Y+2H  | Y-NH3  | Y-H2O  | Y  |
|----|--------|-------|--------|--------|----|--------|-------|--------|--------|----|
| 1  | 116.0  |       |        | 98.0   | D  | 1653.8 | 827.4 | 1636.8 | 1635.8 | 15 |
| 2  | 229.1  |       |        | 211.1  | I  | 1538.8 | 769.9 | 1521.8 | 1520.8 | 14 |
| 3  | 316.2  |       |        | 298.1  | S  | 1425.7 | 713.4 | 1408.7 | 1407.7 | 13 |
| 4  | 445.2  |       |        | 427.2  | E  | 1338.7 | 669.9 | 1321.7 | 1320.7 | 12 |
| 5  | 516.2  |       |        | 498.2  | A  | 1209.7 | 605.3 | 1192.6 | 1191.6 | 11 |
| 6  | 603.3  | 302.1 |        | 585.3  | S  | 1138.6 | 569.8 | 1121.6 | 1120.6 | 10 |
| 7  | 702.3  | 351.7 |        | 684.3  | V  | 1051.6 | 526.3 | 1034.6 | 1033.6 | 9  |
| 8  | 849.4  | 425.2 |        | 831.4  | F  | 952.5  | 476.8 | 935.5  | 934.5  | 8  |
| 9  | 964.4  | 482.7 |        | 946.4  | D  | 805.5  | 403.2 | 788.4  | 787.4  | 7  |
| 10 | 1035.5 | 518.2 |        | 1017.5 | A  | 690.4  | 345.7 | 673.4  |        | 6  |
| 11 | 1198.5 | 599.8 |        | 1180.5 | Y  | 619.4  |       | 602.4  |        | 5  |
| 12 | 1297.6 | 649.3 |        | 1279.6 | V  | 456.3  |       | 439.3  |        | 4  |
| 13 | 1410.7 | 705.8 |        | 1392.7 | L  | 357.3  |       | 340.2  |        | 3  |
| 14 | 1507.7 | 754.4 |        | 1489.7 | P  | 244.2  |       | 227.1  |        | 2  |
| 15 | 1653.8 | 827.4 | 1636.8 | 1635.8 | K  | 147.1  |       | 130.1  |        | 1  |
