# Supplementary material for: Proteomic-based identification of maternal proteins in mature mouse oocytes
Source: PubMed Central journal article supplement (PMC2730056; doi:10.1186/1471-2164-10-348), 2009-08-03
Supplement: 1471-2164-10-348-S3.pdf [file 1471-2164-10-348-S3.pdf]

Gene symbol: EG665646

Protein name: similar to Heterogeneous nuclear ribonucleoprotein A1 (Helix-destabilizing protein) (Single-strand binding protein) (hnRNP core protein A1) (HDP-1) (Topoisomerase-inhibitor suppressed) isoform 2

Protein accession numbers: IPI00224251,IPI00553777,IPI00753579,IPI00753723,IPI00817004

Peptide sequence: (R)GFAFVTFDDHDSVDK(I)

Exclusive (unique to this protein): TRUE

SEQUEST XCorr score: 2.2 SEQUEST DCn score: 0.51

Fix modifications: None

Variable modifications: None

charge: 2

Observed m/z: 850.386

Actual minus calculated peptide mass (AMU): 0.003662

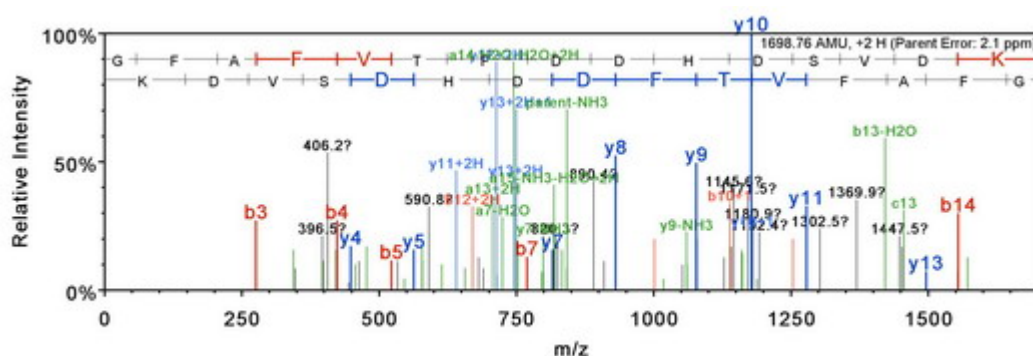

| B  | B ions | B+2H  | B-NH3  | B-H2O  | AA | Y ions | Y+2H  | Y-NH3  | Y-H2O  | Y  |
|----|--------|-------|--------|--------|----|--------|-------|--------|--------|----|
| 1  | 58.0   |       |        |        | G  | 1699.8 | 850.4 | 1682.7 | 1681.8 | 15 |
| 2  | 205.1  |       |        |        | F  | 1642.7 | 821.9 | 1625.7 | 1624.7 | 14 |
| 3  | 276.1  |       |        |        | A  | 1495.7 | 748.3 | 1478.6 | 1477.7 | 13 |
| 4  | 423.2  |       |        |        | F  | 1424.6 | 712.8 | 1407.6 | 1406.6 | 12 |
| 5  | 522.3  |       |        |        | V  | 1277.6 | 639.3 | 1260.5 | 1259.5 | 11 |
| 6  | 623.3  | 312.2 |        | 605.3  | T  | 1178.5 | 589.8 | 1161.5 | 1160.5 | 10 |
| 7  | 770.4  | 385.7 |        | 752.4  | F  | 1077.5 | 539.2 | 1060.4 | 1059.4 | 9  |
| 8  | 885.4  | 443.2 |        | 867.4  | D  | 930.4  | 465.7 | 913.4  | 912.4  | 8  |
| 9  | 1000.4 | 500.7 |        | 982.4  | D  | 815.4  | 408.2 | 798.3  | 797.3  | 7  |
| 10 | 1137.5 | 569.3 |        | 1119.5 | H  | 700.3  | 350.7 | 683.3  | 682.3  | 6  |
| 11 | 1252.5 | 626.8 |        | 1234.5 | D  | 563.3  |       | 546.2  | 545.3  | 5  |
| 12 | 1339.6 | 670.3 |        | 1321.5 | S  | 448.2  |       | 431.2  | 430.2  | 4  |
| 13 | 1438.6 | 719.8 |        | 1420.6 | V  | 361.2  |       | 344.2  | 343.2  | 3  |
| 14 | 1553.7 | 777.3 |        | 1535.6 | D  | 262.1  |       | 245.1  | 244.1  | 2  |
| 15 | 1699.8 | 850.4 | 1682.7 | 1681.8 | K  | 147.1  |       | 130.1  |        | 1  |

Gene symbol: EG667682;Rpl31;LOC676592

Protein name: 60S ribosomal protein L31

Protein accession numbers: IPI00123007,IPI00126910,IPI00676466,IPI00677102,IPI00753412

Peptide sequence: (K)LYTLVITYVPVTTFK(N)

Exclusive (unique to this protein): TRUE

SEQUEST XCorr score: 2.13 SEQUEST DCn score: 0.642

Fix modifications: None

Variable modifications: None

charge: 2

Observed m/z: 822.9641

Actual minus calculated peptide mass (AMU): -0.005005

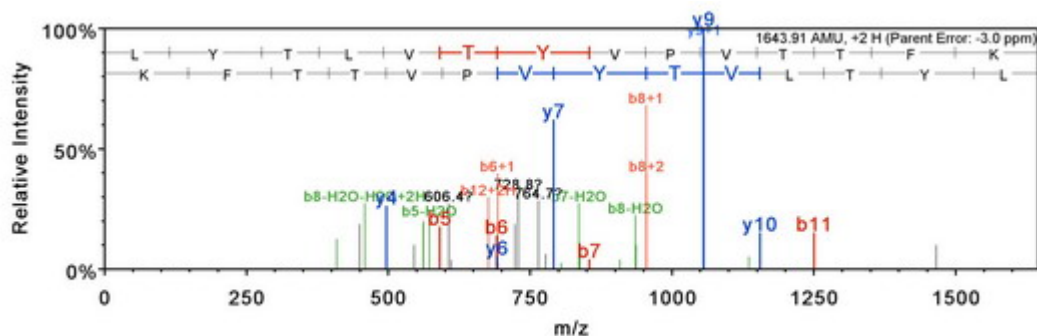

| B  | B ions | B+2H  | B-NH3  | B-H2O  | A,A | Y ions | Y+2H  | Y-NH3  | Y-H2O  | Y  |
|----|--------|-------|--------|--------|-----|--------|-------|--------|--------|----|
| 1  | 114.1  |       |        |        | L   | 1644.9 | 823.0 | 1627.9 | 1626.9 | 14 |
| 2  | 277.2  |       |        |        | Y   | 1531.8 | 766.4 | 1514.8 | 1513.8 | 13 |
| 3  | 378.2  |       |        | 360.2  | T   | 1368.8 | 684.9 | 1351.8 | 1350.8 | 12 |
| 4  | 491.3  |       |        | 473.3  | L   | 1267.7 | 634.4 | 1250.7 | 1249.7 | 11 |
| 5  | 590.4  |       |        | 572.3  | V   | 1154.7 | 577.8 | 1137.6 | 1136.6 | 10 |
| 6  | 691.4  | 346.2 |        | 673.4  | T   | 1055.6 | 528.3 | 1038.5 | 1037.6 | 9  |
| 7  | 854.5  | 427.7 |        | 836.5  | Y   | 954.5  | 477.8 | 937.5  | 936.5  | 8  |
| 8  | 953.5  | 477.3 |        | 935.5  | V   | 791.5  | 396.2 | 774.4  | 773.5  | 7  |
| 9  | 1050.6 | 525.8 |        | 1032.6 | P   | 692.4  | 346.7 | 675.4  | 674.4  | 6  |
| 10 | 1149.7 | 575.3 |        | 1131.7 | V   | 595.4  |       | 578.3  | 577.3  | 5  |
| 11 | 1250.7 | 625.9 |        | 1232.7 | T   | 496.3  |       | 479.3  | 478.3  | 4  |
| 12 | 1351.8 | 676.4 |        | 1333.7 | T   | 395.2  |       | 378.2  | 377.2  | 3  |
| 13 | 1498.8 | 749.9 |        | 1480.8 | F   | 294.2  |       | 277.2  |        | 2  |
| 14 | 1644.9 | 823.0 | 1627.9 | 1626.9 | K   | 147.1  |       | 130.1  |        | 1  |

Gene symbol: EG667847;LOC676775

Protein name: similar to 40S ribosomal protein S2 isoform 2

Protein accession numbers: IPI00752723,IPI00753940

Peptide sequence: (K)TYSYLTPLDWK(E)

Exclusive (unique to this protein): TRUE

SEQUEST XCorr score: 2.38 SEQUEST DCn score: 0.702

Fix modifications: None

Variable modifications: None

charge: 2

Observed m/z: 693.8522

Actual minus calculated peptide mass (AMU): 0.0019551

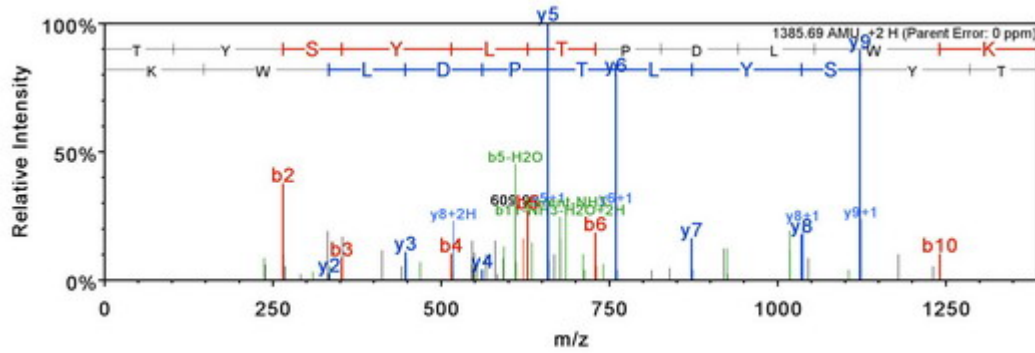

| B  | B ions | B+2H  | B-NH3  | B-H2O  | AA | Y ions | Y+2H  | Y-NH3  | Y-H2O  | Y  |
|----|--------|-------|--------|--------|----|--------|-------|--------|--------|----|
| 1  | 102.1  |       |        | 84.0   | T  | 1386.7 | 693.9 | 1369.7 | 1368.7 | 11 |
| 2  | 265.1  |       |        | 247.1  | Y  | 1285.7 | 643.3 | 1268.6 | 1267.6 | 10 |
| 3  | 352.2  |       |        | 334.1  | S  | 1122.6 | 561.8 | 1105.6 | 1104.6 | 9  |
| 4  | 515.2  |       |        | 497.2  | Y  | 1035.5 | 518.3 | 1018.5 | 1017.5 | 8  |
| 5  | 628.3  |       |        | 610.3  | L  | 872.5  | 436.8 | 855.5  | 854.5  | 7  |
| 6  | 729.4  | 365.2 |        | 711.3  | T  | 759.4  | 380.2 | 742.4  | 741.4  | 6  |
| 7  | 826.4  | 413.7 |        | 808.4  | P  | 658.4  |       | 641.3  | 640.4  | 5  |
| 8  | 941.4  | 471.2 |        | 923.4  | D  | 561.3  |       | 544.3  | 543.3  | 4  |
| 9  | 1054.5 | 527.8 |        | 1036.5 | L  | 446.3  |       | 429.3  |        | 3  |
| 10 | 1240.6 | 620.8 |        | 1222.6 | W  | 333.2  |       | 316.2  |        | 2  |
| 11 | 1386.7 | 693.9 | 1369.7 | 1368.7 | K  | 147.1  |       | 130.1  |        | 1  |

Gene symbol: EG668182;LOC675192;LOC672281

Protein name: similar to 60S ribosomal protein L13

Protein accession numbers:

IPI00134097,IPI00224505,IPI00621028,IPI00625838,IPI00653474,IPI00761637

Peptide sequence: (R)VDTWVFNQPAR(K)

Exclusive (unique to this protein): TRUE

SEQUEST XCorr score: 2.05 SEQUEST DCn score: 0.501

Fix modifications: None

Variable modifications: None

charge: 2

Observed m/z: 617.3032

Actual minus calculated peptide mass (AMU): -0.0031752

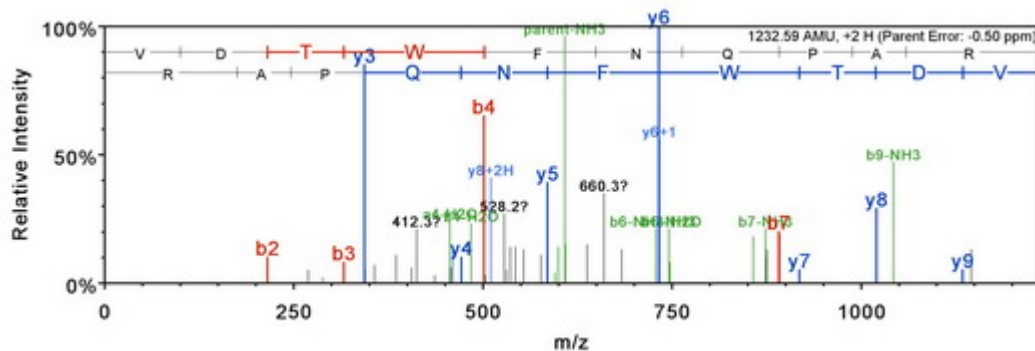

| B  | B ions        | B+2H         | B-NH3         | B-H2O         | AA | Y ions        | Y+2H         | Y-NH3         | Y-H2O         | Y  |
|----|---------------|--------------|---------------|---------------|----|---------------|--------------|---------------|---------------|----|
| 1  | <b>100.1</b>  |              |               |               | V  | <b>1233.6</b> | <b>617.3</b> | <b>1216.6</b> | <b>1215.6</b> | 10 |
| 2  | <b>215.1</b>  |              |               | <b>197.1</b>  | D  | <b>1134.5</b> | <b>567.8</b> | <b>1117.5</b> | <b>1116.5</b> | 9  |
| 3  | <b>316.2</b>  |              |               | <b>298.1</b>  | T  | <b>1019.5</b> | <b>510.3</b> | <b>1002.5</b> | <b>1001.5</b> | 8  |
| 4  | <b>502.2</b>  |              |               | <b>484.2</b>  | W  | <b>918.5</b>  | <b>459.7</b> | <b>901.4</b>  |               | 7  |
| 5  | <b>649.3</b>  |              |               | <b>631.3</b>  | F  | <b>732.4</b>  | <b>366.7</b> | <b>715.4</b>  |               | 6  |
| 6  | <b>763.3</b>  | <b>382.2</b> | <b>746.3</b>  | <b>745.3</b>  | N  | <b>585.3</b>  |              | <b>568.3</b>  |               | 5  |
| 7  | <b>891.4</b>  | <b>446.2</b> | <b>874.4</b>  | <b>873.4</b>  | Q  | <b>471.3</b>  |              | <b>454.2</b>  |               | 4  |
| 8  | <b>988.5</b>  | <b>494.7</b> | <b>971.4</b>  | <b>970.4</b>  | P  | <b>343.2</b>  |              | <b>326.2</b>  |               | 3  |
| 9  | <b>1059.5</b> | <b>530.3</b> | <b>1042.5</b> | <b>1041.5</b> | A  | <b>246.2</b>  |              | <b>229.1</b>  |               | 2  |
| 10 | <b>1233.6</b> | <b>617.3</b> | <b>1216.6</b> | <b>1215.6</b> | R  | <b>175.1</b>  |              | <b>158.1</b>  |               | 1  |

Gene symbol: Eif2s2

Protein name: Eukaryotic translation initiation factor 2 subunit 2

Protein accession numbers: IPI00116302,IPI00480398

Peptide sequence: (R)DYTYEELLNR(V)

Exclusive (unique to this protein): TRUE

SEQUEST XCorr score: 2.2 SEQUEST DCn score: 0.558

Fix modifications: None

Variable modifications: None

charge: 2

Observed m/z: 658.3093

Actual minus calculated peptide mass (AMU): -0.006226

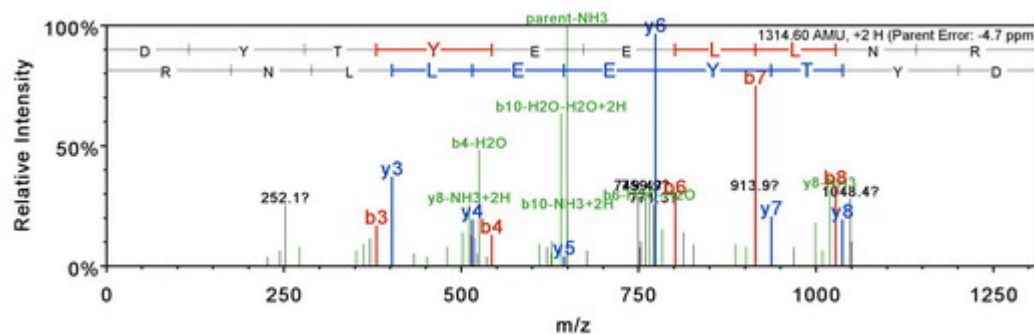

| B  | B ions        | B+2H         | B-NH3         | B-H2O         | AA | Y ions        | Y+2H         | Y-NH3         | Y-H2O         | Y  |
|----|---------------|--------------|---------------|---------------|----|---------------|--------------|---------------|---------------|----|
| 1  | <b>116.0</b>  |              |               | <b>98.0</b>   | D  | <b>1315.6</b> | <b>658.3</b> | <b>1298.6</b> | <b>1297.6</b> | 10 |
| 2  | <b>279.1</b>  |              |               | <b>261.1</b>  | Y  | <b>1200.6</b> | <b>600.8</b> | <b>1183.6</b> | <b>1182.6</b> | 9  |
| 3  | <b>380.2</b>  |              |               | <b>362.1</b>  | T  | <b>1037.5</b> | <b>519.3</b> | <b>1020.5</b> | <b>1019.5</b> | 8  |
| 4  | <b>543.2</b>  |              |               | <b>525.2</b>  | Y  | <b>936.5</b>  | <b>468.7</b> | <b>919.5</b>  | <b>918.5</b>  | 7  |
| 5  | <b>672.3</b>  |              |               | <b>654.2</b>  | E  | <b>773.4</b>  | <b>387.2</b> | <b>756.4</b>  | <b>755.4</b>  | 6  |
| 6  | <b>801.3</b>  | <b>401.2</b> |               | <b>783.3</b>  | E  | <b>644.4</b>  |              | <b>627.4</b>  | <b>626.4</b>  | 5  |
| 7  | <b>914.4</b>  | <b>457.7</b> |               | <b>896.4</b>  | L  | <b>515.3</b>  |              | <b>498.3</b>  |               | 4  |
| 8  | <b>1027.5</b> | <b>514.2</b> |               | <b>1009.5</b> | L  | <b>402.3</b>  |              | <b>385.2</b>  |               | 3  |
| 9  | <b>1141.5</b> | <b>571.3</b> | <b>1124.5</b> | <b>1123.5</b> | N  | <b>289.2</b>  |              | <b>272.1</b>  |               | 2  |
| 10 | <b>1315.6</b> | <b>658.3</b> | <b>1298.6</b> | <b>1297.6</b> | R  | <b>175.1</b>  |              | <b>158.1</b>  |               | 1  |

Gene symbol: Eif4e1b

Protein name: 2 cells egg cDNA, RIKEN full-length enriched library, clone:B020005H16

product:weakly similar to Eukaryotic translation initiation factor eIF4E-1

Protein accession numbers: IPI00341534

Peptide sequence: (R)AWQDNLQLVTK(F)

Exclusive (unique to this protein): TRUE

SEQUEST XCorr score: 3.56 SEQUEST DCn score: 0.647

Fix modifications: None

Variable modifications: None

charge: 2

Observed m/z: 658.3536

Actual minus calculated peptide mass (AMU): -0.001831

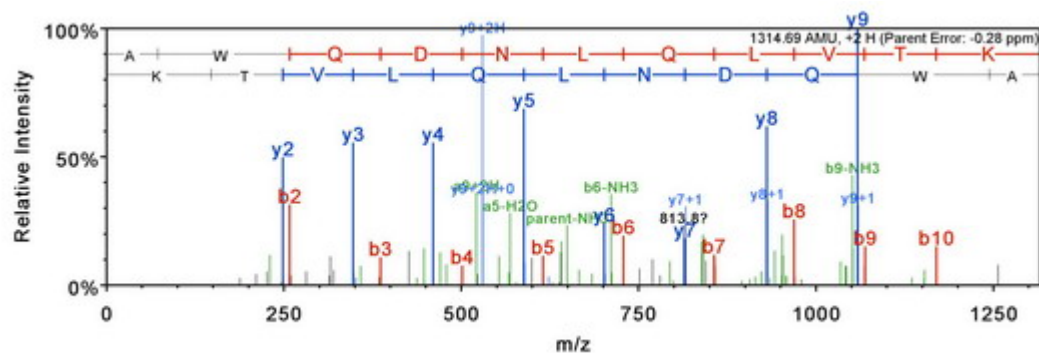

| B  | B ions | B+2H  | B-NH3  | B-H2O  | A,A | Y ions | Y+2H  | Y-NH3  | Y-H2O  | Y  |
|----|--------|-------|--------|--------|-----|--------|-------|--------|--------|----|
| 1  | 72.0   |       |        |        | A   | 1315.7 | 658.4 | 1298.7 | 1297.7 | 11 |
| 2  | 258.1  |       |        |        | W   | 1244.7 | 622.8 | 1227.6 | 1226.7 | 10 |
| 3  | 386.2  |       | 369.2  |        | Q   | 1058.6 | 529.8 | 1041.6 | 1040.6 | 9  |
| 4  | 501.2  |       | 484.2  | 483.2  | D   | 930.5  | 465.8 | 913.5  | 912.5  | 8  |
| 5  | 615.3  |       | 598.2  | 597.2  | N   | 815.5  | 408.3 | 798.5  | 797.5  | 7  |
| 6  | 728.3  | 364.7 | 711.3  | 710.3  | L   | 701.5  | 351.2 | 684.4  | 683.5  | 6  |
| 7  | 856.4  | 428.7 | 839.4  | 838.4  | Q   | 588.4  |       | 571.4  | 570.4  | 5  |
| 8  | 969.5  | 485.2 | 952.5  | 951.5  | L   | 460.3  |       | 443.3  | 442.3  | 4  |
| 9  | 1068.5 | 534.8 | 1051.5 | 1050.5 | V   | 347.2  |       | 330.2  | 329.2  | 3  |
| 10 | 1169.6 | 585.3 | 1152.6 | 1151.6 | T   | 248.2  |       | 231.1  | 230.2  | 2  |
| 11 | 1315.7 | 658.4 | 1298.7 | 1297.7 | K   | 147.1  |       | 130.1  |        | 1  |

Gene symbol: Eif4e3

Protein name: Eukaryotic translation initiation factor 4E type 3

Protein accession numbers: IPI00319027

Peptide sequence: (R)SLPGATAAECASNLK(K)

Exclusive (unique to this protein): TRUE

SEQUEST XCorr score: 2.28 SEQUEST DCn score: 0.583

Fix modifications: C10: Carbamidomethyl (+57.02) Variable modifications: None

charge: 2

Observed m/z: 745.371

Actual minus calculated peptide mass (AMU): 0.002075

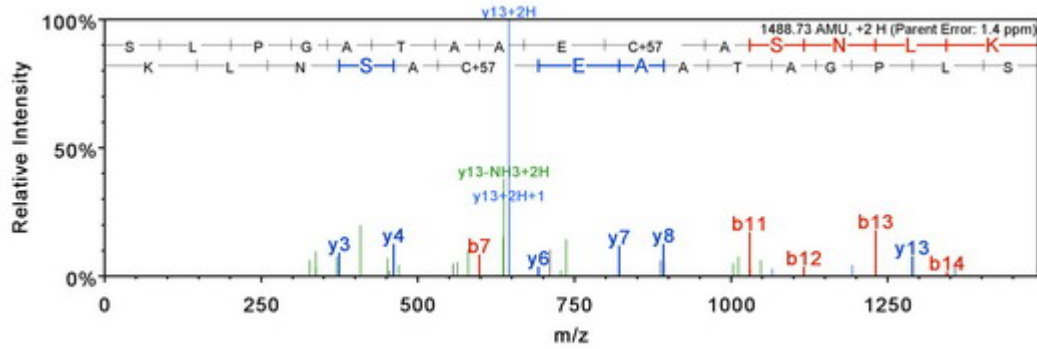

| B  | B ions | B+2H  | B-NH3  | B-H2O  | AA   | Y ions | Y+2H  | Y-NH3  | Y-H2O  | Y  |
|----|--------|-------|--------|--------|------|--------|-------|--------|--------|----|
| 1  | 88.0   |       |        | 70.0   | S    | 1489.7 | 745.4 | 1472.7 | 1471.7 | 15 |
| 2  | 201.1  |       |        | 183.1  | L    | 1402.7 | 701.9 | 1385.7 | 1384.7 | 14 |
| 3  | 298.2  |       |        | 280.2  | P    | 1289.6 | 645.3 | 1272.6 | 1271.6 | 13 |
| 4  | 355.2  |       |        | 337.2  | G    | 1192.6 | 596.8 | 1175.5 | 1174.5 | 12 |
| 5  | 426.2  |       |        | 408.2  | A    | 1135.5 | 568.3 | 1118.5 | 1117.5 | 11 |
| 6  | 527.3  | 264.1 |        | 509.3  | T    | 1064.5 | 532.8 | 1047.5 | 1046.5 | 10 |
| 7  | 598.3  | 299.7 |        | 580.3  | A    | 963.5  | 482.2 | 946.4  | 945.5  | 9  |
| 8  | 669.4  | 335.2 |        | 651.4  | A    | 892.4  | 446.7 | 875.4  | 874.4  | 8  |
| 9  | 798.4  | 399.7 |        | 780.4  | E    | 821.4  | 411.2 | 804.4  | 803.4  | 7  |
| 10 | 958.4  | 479.7 |        | 940.4  | C+57 | 692.3  | 346.7 | 675.3  | 674.3  | 6  |
| 11 | 1029.5 | 515.2 |        | 1011.5 | A    | 532.3  |       | 515.3  | 514.3  | 5  |
| 12 | 1116.5 | 558.8 |        | 1098.5 | S    | 461.3  |       | 444.3  | 443.3  | 4  |
| 13 | 1230.5 | 615.8 | 1213.5 | 1212.5 | N    | 374.2  |       | 357.2  |        | 3  |
| 14 | 1343.6 | 672.3 | 1326.6 | 1325.6 | L    | 260.2  |       | 243.2  |        | 2  |
| 15 | 1489.7 | 745.4 | 1472.7 | 1471.7 | K    | 147.1  |       | 130.1  |        | 1  |

Gene symbol: Eif4h

Protein name: Isoform Long of Eukaryotic translation initiation factor 4H

Protein accession numbers: IPI00124742,IPI00222560

Peptide sequence: (R)TVATPLNQVANPNSAIFGGAR(P)

Exclusive (unique to this protein): TRUE

SEQUEST XCorr score: 2.62 SEQUEST DCn score: 0.644

Fix modifications: None

Variable modifications: None

charge: 2

Observed m/z: 1049.5596

Actual minus calculated peptide mass (AMU): 0.006836

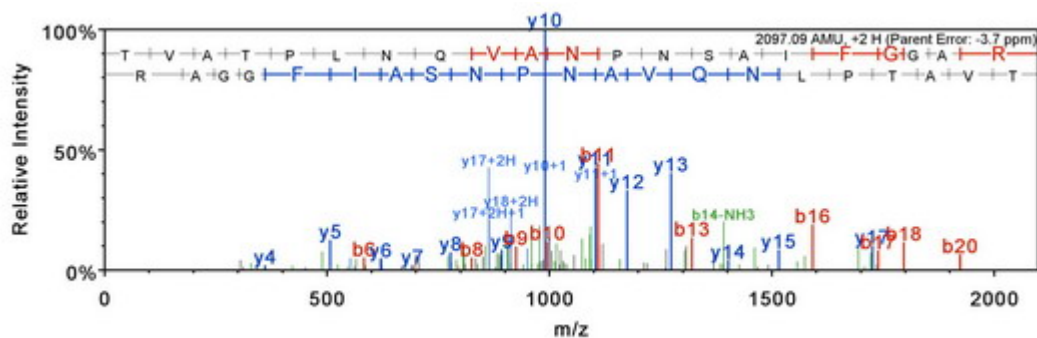

| B  | B Ions | B+2H   | B-NH3  | B-H2O  | AA | Y Ions | Y+2H   | Y-NH3  | Y-H2O  | Y  |
|----|--------|--------|--------|--------|----|--------|--------|--------|--------|----|
| 1  | 102.1  |        |        | 84.0   | T  | 2098.1 | 1049.6 | 2081.1 | 2080.1 | 21 |
| 2  | 201.1  |        |        | 183.1  | V  | 1997.1 | 999.0  | 1980.0 | 1979.1 | 20 |
| 3  | 272.2  |        |        | 254.2  | A  | 1898.0 | 949.5  | 1881.0 | 1880.0 | 19 |
| 4  | 373.2  |        |        | 355.2  | T  | 1827.0 | 914.0  | 1809.9 | 1808.9 | 18 |
| 5  | 470.3  |        |        | 452.3  | P  | 1725.9 | 863.5  | 1708.9 | 1707.9 | 17 |
| 6  | 583.4  | 292.2  |        | 565.3  | L  | 1628.9 | 814.9  | 1611.8 | 1610.8 | 16 |
| 7  | 697.4  | 349.2  | 680.4  | 679.4  | N  | 1515.8 | 758.4  | 1498.7 | 1497.8 | 15 |
| 8  | 825.5  | 413.2  | 808.4  | 807.4  | Q  | 1401.7 | 701.4  | 1384.7 | 1383.7 | 14 |
| 9  | 924.5  | 462.8  | 907.5  | 906.5  | V  | 1273.7 | 637.3  | 1256.6 | 1255.7 | 13 |
| 10 | 995.6  | 498.3  | 978.5  | 977.5  | A  | 1174.6 | 587.8  | 1157.6 | 1156.6 | 12 |
| 11 | 1109.6 | 555.3  | 1092.6 | 1091.6 | N  | 1103.6 | 552.3  | 1086.5 | 1085.5 | 11 |
| 12 | 1206.7 | 603.8  | 1189.6 | 1188.6 | P  | 989.5  | 495.3  | 972.5  | 971.5  | 10 |
| 13 | 1320.7 | 660.9  | 1303.7 | 1302.7 | N  | 892.5  | 446.7  | 875.4  | 874.5  | 9  |
| 14 | 1407.7 | 704.4  | 1390.7 | 1389.7 | S  | 778.4  | 389.7  | 761.4  | 760.4  | 8  |
| 15 | 1478.8 | 739.9  | 1461.7 | 1460.8 | A  | 691.4  | 346.2  | 674.4  |        | 7  |
| 16 | 1591.8 | 796.4  | 1574.8 | 1573.8 | I  | 620.4  | 310.7  | 603.3  |        | 6  |
| 17 | 1738.9 | 870.0  | 1721.9 | 1720.9 | F  | 507.3  |        | 490.2  |        | 5  |
| 18 | 1795.9 | 898.5  | 1778.9 | 1777.9 | G  | 360.2  |        | 343.2  |        | 4  |
| 19 | 1853.0 | 927.0  | 1835.9 | 1835.0 | G  | 303.2  |        | 286.2  |        | 3  |
| 20 | 1924.0 | 962.5  | 1907.0 | 1906.0 | A  | 246.2  |        | 229.1  |        | 2  |
| 21 | 2098.1 | 1049.6 | 2081.1 | 2080.1 | R  | 175.1  |        | 158.1  |        | 1  |

Gene symbol: Eif5a

Protein name: Eukaryotic translation initiation factor 5A-1

Protein accession numbers: IPI00108125,IPI00648714

Peptide sequence: (K)VHLVGIDFTGK(K)

Exclusive (unique to this protein): TRUE

SEQUEST XCorr score: 2.01 SEQUEST DCn score: 0.546

Fix modifications: None

Variable modifications: None

charge: 2

Observed m/z: 649.8741

Actual minus calculated peptide mass (AMU): -0.0070758

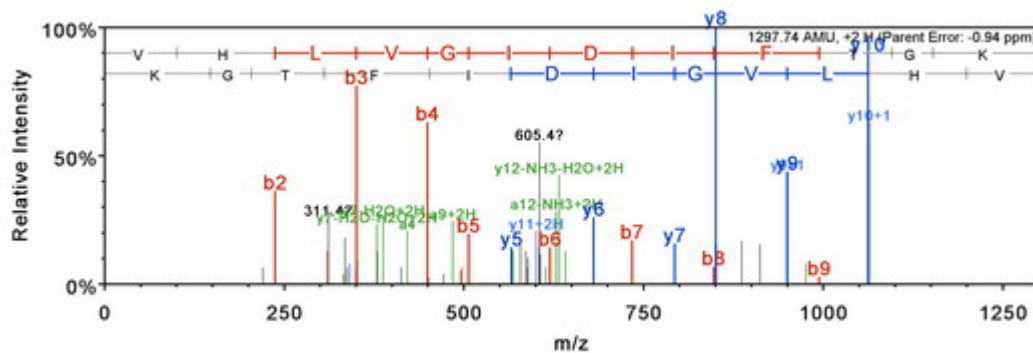

| B  | B Ions | B+2H  | B-NH3  | B-H2O  | AA | Y Ions | Y+2H  | Y-NH3  | Y-H2O  | Y  |
|----|--------|-------|--------|--------|----|--------|-------|--------|--------|----|
| 1  | 100.1  |       |        |        | V  | 1298.8 | 649.9 | 1281.7 | 1280.7 | 12 |
| 2  | 237.1  | 119.1 |        |        | H  | 1199.7 | 600.3 | 1182.7 | 1181.7 | 11 |
| 3  | 350.2  | 175.6 |        |        | L  | 1062.6 | 531.8 | 1045.6 | 1044.6 | 10 |
| 4  | 449.3  | 225.2 |        |        | V  | 949.5  | 475.3 | 932.5  | 931.5  | 9  |
| 5  | 506.3  | 253.7 |        |        | G  | 850.5  | 425.7 | 833.4  | 832.5  | 8  |
| 6  | 619.4  | 310.2 |        |        | I  | 793.5  | 397.2 | 776.4  | 775.4  | 7  |
| 7  | 734.4  | 367.7 |        | 716.4  | D  | 680.4  | 340.7 | 663.3  | 662.4  | 6  |
| 8  | 847.5  | 424.3 |        | 829.5  | I  | 565.3  |       | 548.3  | 547.3  | 5  |
| 9  | 994.6  | 497.8 |        | 976.6  | F  | 452.3  |       | 435.2  | 434.2  | 4  |
| 10 | 1095.6 | 548.3 |        | 1077.6 | T  | 305.2  |       | 288.2  | 287.2  | 3  |
| 11 | 1152.6 | 576.8 |        | 1134.6 | G  | 204.1  |       | 187.1  |        | 2  |
| 12 | 1298.8 | 649.9 | 1281.7 | 1280.7 | K  | 147.1  |       | 130.1  |        | 1  |

Gene symbol: Elmod2

Protein name: ELMO domain-containing protein 2

Protein accession numbers: IPI00467315

Peptide sequence: (K)QWADIGFQGDDPK(T)

Exclusive (unique to this protein): TRUE

SEQUEST XCorr score: 2.12 SEQUEST DCn score: 0.473

Fix modifications: None

Variable modifications: None

charge: 2

Observed m/z: 738.8408

Actual minus calculated peptide mass (AMU): -0.002441

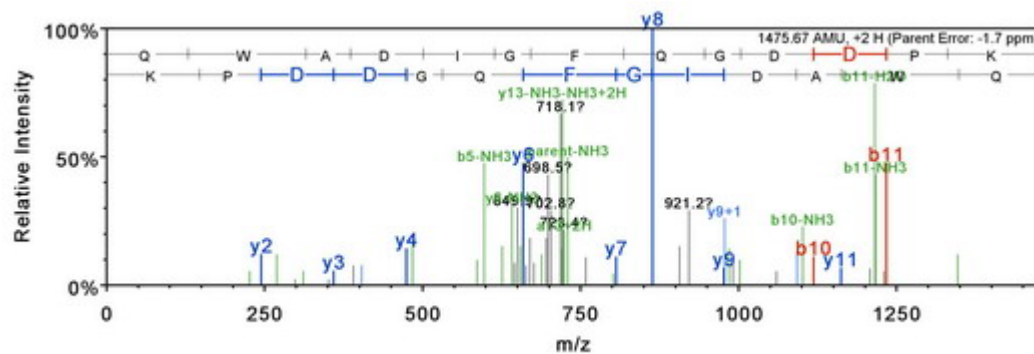

| B  | B Ions | B+2H  | B-NH3  | B-H2O  | AA | Y Ions | Y+2H  | Y-NH3  | Y-H2O  | Y  |
|----|--------|-------|--------|--------|----|--------|-------|--------|--------|----|
| 1  | 129.1  |       | 112.0  |        | Q  | 1476.7 | 738.8 | 1459.7 | 1458.7 | 13 |
| 2  | 315.2  |       | 298.1  |        | W  | 1348.6 | 674.8 | 1331.6 | 1330.6 | 12 |
| 3  | 386.2  |       | 369.2  |        | A  | 1162.5 | 581.8 | 1145.5 | 1144.5 | 11 |
| 4  | 501.2  |       | 484.2  | 483.2  | D  | 1091.5 | 546.3 | 1074.5 | 1073.5 | 10 |
| 5  | 614.3  |       | 597.3  | 596.3  | I  | 976.5  | 488.7 | 959.5  | 958.5  | 9  |
| 6  | 671.3  | 336.2 | 654.3  | 653.3  | G  | 863.4  | 432.2 | 846.4  | 845.4  | 8  |
| 7  | 818.4  | 409.7 | 801.4  | 800.4  | F  | 806.4  | 403.7 | 789.3  | 788.4  | 7  |
| 8  | 946.4  | 473.7 | 929.4  | 928.4  | Q  | 659.3  | 330.2 | 642.3  | 641.3  | 6  |
| 9  | 1003.5 | 502.2 | 986.4  | 985.5  | G  | 531.2  |       | 514.2  | 513.2  | 5  |
| 10 | 1118.5 | 559.8 | 1101.5 | 1100.5 | D  | 474.2  |       | 457.2  | 456.2  | 4  |
| 11 | 1233.5 | 617.3 | 1216.5 | 1215.5 | D  | 359.2  |       | 342.2  | 341.2  | 3  |
| 12 | 1330.6 | 665.8 | 1313.5 | 1312.6 | P  | 244.2  |       | 227.1  |        | 2  |
| 13 | 1476.7 | 738.8 | 1459.7 | 1458.7 | K  | 147.1  |       | 130.1  |        | 1  |



Gene symbol: Eprs

Protein name: Bifunctional aminoacyl-tRNA synthetase

Protein accession numbers: IPI00339916

Peptide sequence: (R)VSETVAFTDVNSILR(Y)

Exclusive (unique to this protein): TRUE

SEQUEST XCorr score: 2.25 SEQUEST DCn score: 0.621

Fix modifications: None

Variable modifications: None

charge: 2

Observed m/z: 825.9382

Actual minus calculated peptide mass (AMU): -0.001709

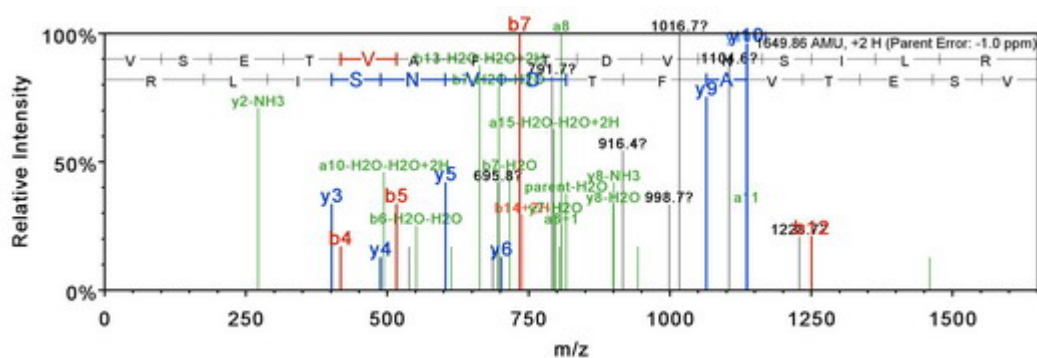

| B  | B ions | B+2H  | B-NH3  | B-H2O  | AA | Y ions | Y+2H  | Y-NH3  | Y-H2O  | Y  |
|----|--------|-------|--------|--------|----|--------|-------|--------|--------|----|
| 1  | 100.1  |       |        |        | V  | 1650.9 | 825.9 | 1633.8 | 1632.9 | 15 |
| 2  | 187.1  |       |        | 169.1  | S  | 1551.8 | 776.4 | 1534.8 | 1533.8 | 14 |
| 3  | 316.2  |       |        | 298.1  | E  | 1464.8 | 732.9 | 1447.7 | 1446.8 | 13 |
| 4  | 417.2  |       |        | 399.2  | T  | 1335.7 | 668.4 | 1318.7 | 1317.7 | 12 |
| 5  | 516.3  |       |        | 498.3  | V  | 1234.7 | 617.8 | 1217.7 | 1216.7 | 11 |
| 6  | 587.3  | 294.2 |        | 569.3  | A  | 1135.6 | 568.3 | 1118.6 | 1117.6 | 10 |
| 7  | 734.4  | 367.7 |        | 716.4  | F  | 1064.6 | 532.8 | 1047.5 | 1046.6 | 9  |
| 8  | 835.4  | 418.2 |        | 817.4  | T  | 917.5  | 459.3 | 900.5  | 899.5  | 8  |
| 9  | 950.5  | 475.7 |        | 932.4  | D  | 816.5  | 408.7 | 799.4  | 798.5  | 7  |
| 10 | 1049.5 | 525.3 |        | 1031.5 | V  | 701.4  | 351.2 | 684.4  | 683.4  | 6  |
| 11 | 1163.6 | 582.3 | 1146.5 | 1145.5 | N  | 602.4  |       | 585.3  | 584.4  | 5  |
| 12 | 1250.6 | 625.8 | 1233.6 | 1232.6 | S  | 488.3  |       | 471.3  | 470.3  | 4  |
| 13 | 1363.7 | 682.3 | 1346.7 | 1345.7 | I  | 401.3  |       | 384.3  |        | 3  |
| 14 | 1476.8 | 738.9 | 1459.7 | 1458.8 | L  | 288.2  |       | 271.2  |        | 2  |
| 15 | 1650.9 | 825.9 | 1633.8 | 1632.9 | R  | 175.1  |       | 158.1  |        | 1  |

Gene symbol: Etfb

Protein name: Electron transfer flavoprotein subunit beta

Protein accession numbers: IPI00121440

Peptide sequence: (R)GIHVEIPGAQESLGPLQVAR(V)

Exclusive (unique to this protein): TRUE

SEQUEST XCorr score: 3.28 SEQUEST DCn score: 0.685

Fix modifications: None

Variable modifications: None

charge: 2

Observed m/z: 1071.5848

Actual minus calculated peptide mass (AMU): -0.005371

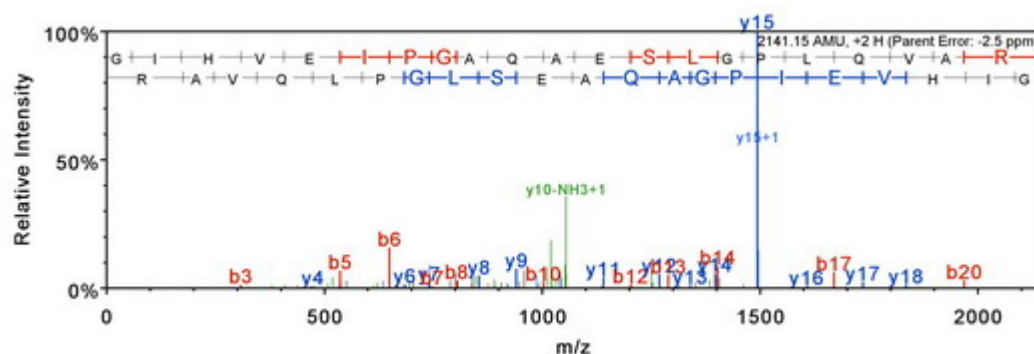

| B  | B ions | B+2H   | B-NH3  | B-H2O  | AA | Y ions | Y+2H   | Y-NH3  | Y-H2O  | Y  |
|----|--------|--------|--------|--------|----|--------|--------|--------|--------|----|
| 1  | 58.0   |        |        |        | G  | 2142.2 | 1071.6 | 2125.1 | 2124.2 | 21 |
| 2  | 171.1  |        |        |        | I  | 2085.2 | 1043.1 | 2068.1 | 2067.1 | 20 |
| 3  | 308.2  | 154.6  |        |        | H  | 1972.1 | 986.5  | 1955.0 | 1954.1 | 19 |
| 4  | 407.2  | 204.1  |        |        | V  | 1835.0 | 918.0  | 1818.0 | 1817.0 | 18 |
| 5  | 536.3  | 268.6  |        | 518.3  | E  | 1735.9 | 868.5  | 1718.9 | 1717.9 | 17 |
| 6  | 649.4  | 325.2  |        | 631.4  | I  | 1606.9 | 804.0  | 1589.9 | 1588.9 | 16 |
| 7  | 746.4  | 373.7  |        | 728.4  | P  | 1493.8 | 747.4  | 1476.8 | 1475.8 | 15 |
| 8  | 803.4  | 402.2  |        | 785.4  | G  | 1396.8 | 698.9  | 1379.7 | 1378.7 | 14 |
| 9  | 874.5  | 437.7  |        | 856.5  | A  | 1339.7 | 670.4  | 1322.7 | 1321.7 | 13 |
| 10 | 1002.5 | 501.8  | 985.5  | 984.5  | Q  | 1268.7 | 634.9  | 1251.7 | 1250.7 | 12 |
| 11 | 1073.6 | 537.3  | 1056.5 | 1055.6 | A  | 1140.6 | 570.8  | 1123.6 | 1122.6 | 11 |
| 12 | 1202.6 | 601.8  | 1185.6 | 1184.6 | E  | 1069.6 | 535.3  | 1052.6 | 1051.6 | 10 |
| 13 | 1289.7 | 645.3  | 1272.6 | 1271.6 | S  | 940.6  | 470.8  | 923.5  | 922.6  | 9  |
| 14 | 1402.7 | 701.9  | 1385.7 | 1384.7 | L  | 853.5  | 427.3  | 836.5  |        | 8  |
| 15 | 1459.8 | 730.4  | 1442.7 | 1441.7 | G  | 740.4  | 370.7  | 723.4  |        | 7  |
| 16 | 1556.8 | 778.9  | 1539.8 | 1538.8 | P  | 683.4  | 342.2  | 666.4  |        | 6  |
| 17 | 1669.9 | 835.5  | 1652.9 | 1651.9 | L  | 586.4  |        | 569.3  |        | 5  |
| 18 | 1798.0 | 899.5  | 1780.9 | 1779.9 | Q  | 473.3  |        | 456.3  |        | 4  |
| 19 | 1897.0 | 949.0  | 1880.0 | 1879.0 | V  | 345.2  |        | 328.2  |        | 3  |
| 20 | 1968.1 | 984.5  | 1951.0 | 1950.1 | A  | 246.2  |        | 229.1  |        | 2  |
| 21 | 2142.2 | 1071.6 | 2125.1 | 2124.2 | R  | 175.1  |        | 158.1  |        | 1  |

Gene symbol: Fbxo38

Protein name: F-box only protein 38

Protein accession numbers: IPI00341601

Peptide sequence: (R)EVL PVD ADEEQAGPSGLQR(V)

Exclusive (unique to this protein): TRUE

SEQUEST XCorr score: 2.1

SEQUEST DCn score: 0.548

Fix modifications: None

Variable modifications: None

charge: 2

Observed m/z: 1005.4883

Actual minus calculated peptide mass (AMU): -0.009399

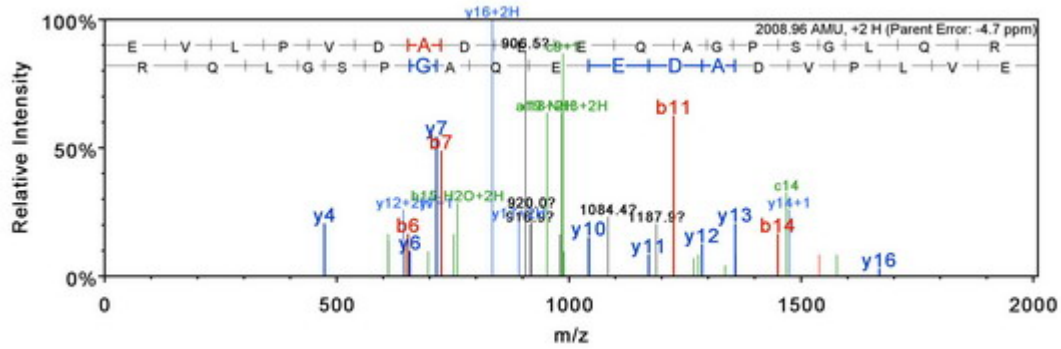

| B  | B ions | B+2H   | B-NH3  | B-H2O  | AA | Y ions | Y+2H   | Y-NH3  | Y-H2O  | Y  |
|----|--------|--------|--------|--------|----|--------|--------|--------|--------|----|
| 1  | 130.1  |        |        | 112.0  | E  | 2010.0 | 1005.5 | 1993.0 | 1992.0 | 19 |
| 2  | 229.1  |        |        | 211.1  | V  | 1880.9 | 941.0  | 1863.9 | 1862.9 | 18 |
| 3  | 342.2  |        |        | 324.2  | L  | 1781.9 | 891.4  | 1764.8 | 1763.9 | 17 |
| 4  | 439.3  |        |        | 421.3  | P  | 1668.8 | 834.9  | 1651.8 | 1650.8 | 16 |
| 5  | 538.3  |        |        | 520.3  | V  | 1571.7 | 786.4  | 1554.7 | 1553.7 | 15 |
| 6  | 653.4  | 327.2  |        | 635.3  | D  | 1472.7 | 736.8  | 1455.6 | 1454.7 | 14 |
| 7  | 724.4  | 362.7  |        | 706.4  | A  | 1357.6 | 679.3  | 1340.6 | 1339.6 | 13 |
| 8  | 839.4  | 420.2  |        | 821.4  | D  | 1286.6 | 643.8  | 1269.6 | 1268.6 | 12 |
| 9  | 968.5  | 484.7  |        | 950.5  | E  | 1171.6 | 586.3  | 1154.5 | 1153.6 | 11 |
| 10 | 1097.5 | 549.3  |        | 1079.5 | E  | 1042.5 | 521.8  | 1025.5 | 1024.5 | 10 |
| 11 | 1225.6 | 613.3  | 1208.5 | 1207.5 | Q  | 913.5  | 457.3  | 896.5  | 895.5  | 9  |
| 12 | 1296.6 | 648.8  | 1279.6 | 1278.6 | A  | 785.4  | 393.2  | 768.4  | 767.4  | 8  |
| 13 | 1353.6 | 677.3  | 1336.6 | 1335.6 | G  | 714.4  | 357.7  | 697.4  | 696.4  | 7  |
| 14 | 1450.7 | 725.8  | 1433.6 | 1432.7 | P  | 657.4  | 329.2  | 640.3  | 639.4  | 6  |
| 15 | 1537.7 | 769.4  | 1520.7 | 1519.7 | S  | 560.3  |        | 543.3  | 542.3  | 5  |
| 16 | 1594.7 | 797.9  | 1577.7 | 1576.7 | G  | 473.3  |        | 456.3  |        | 4  |
| 17 | 1707.8 | 854.4  | 1690.8 | 1689.8 | L  | 416.3  |        | 399.2  |        | 3  |
| 18 | 1835.9 | 918.4  | 1818.8 | 1817.9 | Q  | 303.2  |        | 286.2  |        | 2  |
| 19 | 2010.0 | 1005.5 | 1993.0 | 1992.0 | R  | 175.1  |        | 158.1  |        | 1  |

Gene symbol: Fdft1

Protein name: Squalene synthetase

Protein accession numbers: IPI00134836,IPI00338068

Peptide sequence: (R)TQNLPCQLISR(S)

Exclusive (unique to this protein): TRUE

SEQUEST XCorr score: 2.24 SEQUEST DCn score: 0.548

Fix modifications: C7: Carbamidomethyl (+57.02)Variable modifications: None

charge: 2 Observed m/z: 722.3715

Actual minus calculated peptide mass (AMU): -0.0028056

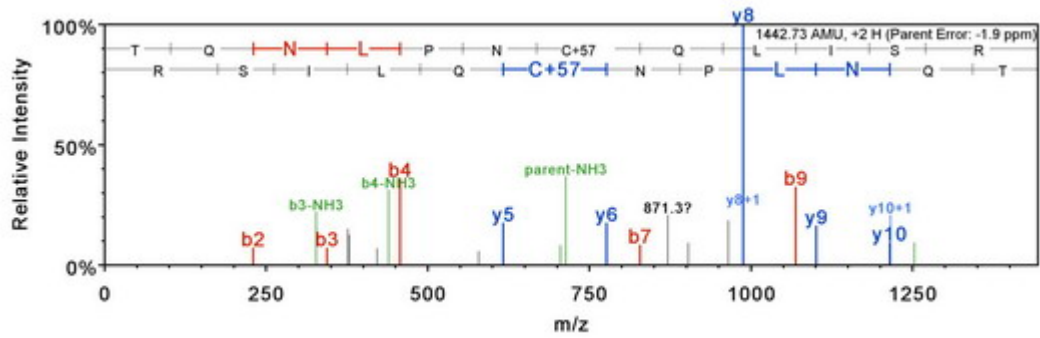

| B  | B Ions | B+2H  | B-NH3  | B-H2O  | A,A  | Y Ions | Y+2H  | Y-NH3  | Y-H2O  | Y  |
|----|--------|-------|--------|--------|------|--------|-------|--------|--------|----|
| 1  | 102.1  |       |        | 84.0   | T    | 1443.7 | 722.4 | 1426.7 | 1425.7 | 12 |
| 2  | 230.1  |       | 213.1  | 212.1  | Q    | 1342.7 | 671.9 | 1325.7 | 1324.7 | 11 |
| 3  | 344.2  |       | 327.1  | 326.2  | N    | 1214.6 | 607.8 | 1197.6 | 1196.6 | 10 |
| 4  | 457.2  |       | 440.2  | 439.2  | L    | 1100.6 | 550.8 | 1083.6 | 1082.6 | 9  |
| 5  | 554.3  |       | 537.3  | 536.3  | P    | 987.5  | 494.3 | 970.5  | 969.5  | 8  |
| 6  | 668.3  | 334.7 | 651.3  | 650.3  | N    | 890.5  | 445.7 | 873.4  | 872.4  | 7  |
| 7  | 828.4  | 414.7 | 811.3  | 810.4  | C+57 | 776.4  | 388.7 | 759.4  | 758.4  | 6  |
| 8  | 956.4  | 478.7 | 939.4  | 938.4  | Q    | 616.4  |       | 599.4  | 598.4  | 5  |
| 9  | 1069.5 | 535.3 | 1052.5 | 1051.5 | L    | 488.3  |       | 471.3  | 470.3  | 4  |
| 10 | 1182.6 | 591.8 | 1165.6 | 1164.6 | I    | 375.2  |       | 358.2  | 357.2  | 3  |
| 11 | 1269.6 | 635.3 | 1252.6 | 1251.6 | S    | 262.1  |       | 245.1  | 244.1  | 2  |
| 12 | 1443.7 | 722.4 | 1426.7 | 1425.7 | R    | 175.1  |       | 158.1  |        | 1  |

Gene symbol: Fh1

Protein name: Isoform Mitochondrial of Fumarate hydratase, mitochondrial precursor

Protein accession numbers: IPI00129928,IPI00759940

Peptide sequence: (R)IYELAAGGTAVGTGLNTR(I)

Exclusive (unique to this protein): TRUE

SEQUEST XCorr score: 2.62 SEQUEST DCn score: 0.488

Fix modifications: None

Variable modifications: None

charge: 2

Observed m/z: 882.4662

Actual minus calculated peptide mass (AMU): -0.004761

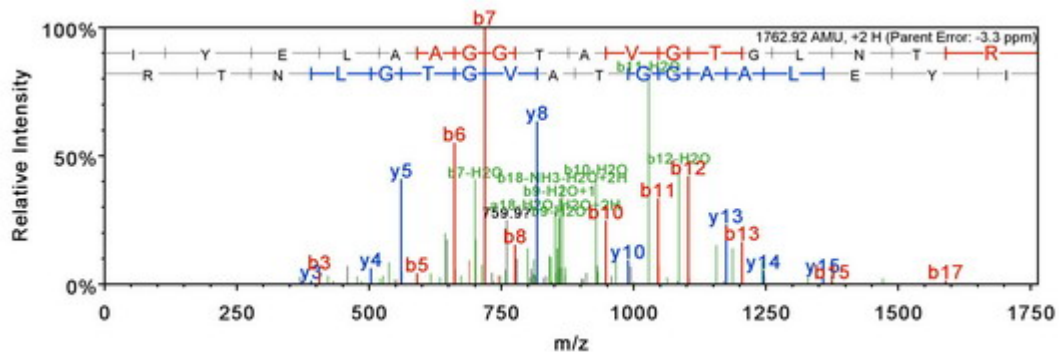

| B  | B Ions | B+2H  | B-NH3  | B-H2O  | AA | Y Ions | Y+2H  | Y-NH3  | Y-H2O  | Y  |
|----|--------|-------|--------|--------|----|--------|-------|--------|--------|----|
| 1  | 114.1  |       |        |        | I  | 1763.9 | 882.5 | 1746.9 | 1745.9 | 18 |
| 2  | 277.2  |       |        |        | Y  | 1650.9 | 825.9 | 1633.8 | 1632.8 | 17 |
| 3  | 406.2  |       |        | 388.2  | E  | 1487.8 | 744.4 | 1470.8 | 1469.8 | 16 |
| 4  | 519.3  |       |        | 501.3  | L  | 1358.7 | 679.9 | 1341.7 | 1340.7 | 15 |
| 5  | 590.3  |       |        | 572.3  | A  | 1245.7 | 623.3 | 1228.6 | 1227.6 | 14 |
| 6  | 661.4  | 331.2 |        | 643.4  | A  | 1174.6 | 587.8 | 1157.6 | 1156.6 | 13 |
| 7  | 718.4  | 359.7 |        | 700.4  | G  | 1103.6 | 552.3 | 1086.5 | 1085.6 | 12 |
| 8  | 775.4  | 388.2 |        | 757.4  | G  | 1046.6 | 523.8 | 1029.5 | 1028.5 | 11 |
| 9  | 876.5  | 438.7 |        | 858.4  | T  | 989.5  | 495.3 | 972.5  | 971.5  | 10 |
| 10 | 947.5  | 474.3 |        | 929.5  | A  | 888.5  | 444.8 | 871.5  | 870.5  | 9  |
| 11 | 1046.5 | 523.8 |        | 1028.5 | V  | 817.5  | 409.2 | 800.4  | 799.4  | 8  |
| 12 | 1103.6 | 552.3 |        | 1085.6 | G  | 718.4  | 359.7 | 701.4  | 700.4  | 7  |
| 13 | 1204.6 | 602.8 |        | 1186.6 | T  | 661.4  | 331.2 | 644.3  | 643.4  | 6  |
| 14 | 1261.6 | 631.3 |        | 1243.6 | G  | 560.3  |       | 543.3  | 542.3  | 5  |
| 15 | 1374.7 | 687.9 |        | 1356.7 | L  | 503.3  |       | 486.3  | 485.3  | 4  |
| 16 | 1488.8 | 744.9 | 1471.7 | 1470.8 | N  | 390.2  |       | 373.2  | 372.2  | 3  |
| 17 | 1589.8 | 795.4 | 1572.8 | 1571.8 | T  | 276.2  |       | 259.1  | 258.2  | 2  |
| 18 | 1763.9 | 882.5 | 1746.9 | 1745.9 | R  | 175.1  |       | 158.1  |        | 1  |

Gene symbol: Fis1

Protein name: Mitochondrial fission 1 protein

Protein accession numbers: IPI00132217

Peptide sequence: (R)GIVLLEELLPK(G)

Exclusive (unique to this protein): TRUE

SEQUEST XCorr score: 2.13 SEQUEST DCn score: 0.493

Fix modifications: None

Variable modifications: None

charge: 2

Observed m/z: 612.3849

Actual minus calculated peptide mass (AMU): 0.0001221

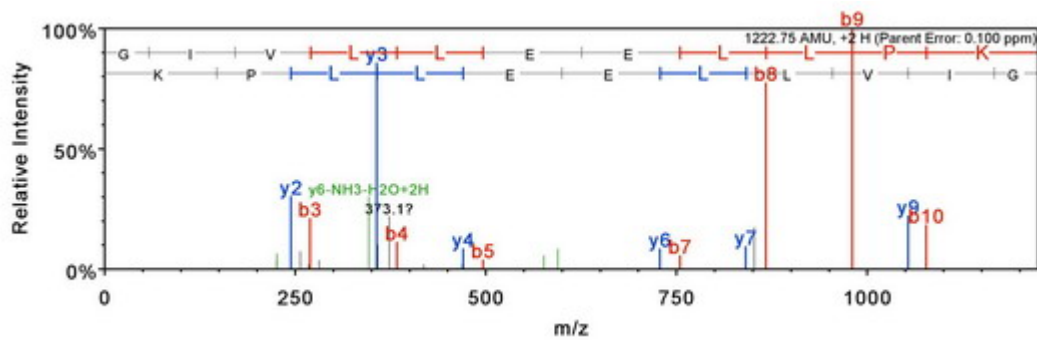

| B  | B Ions | B+2H  | B-NH3  | B-H2O  | AA | Y Ions | Y+2H  | Y-NH3  | Y-H2O  | Y  |
|----|--------|-------|--------|--------|----|--------|-------|--------|--------|----|
| 1  | 58.0   |       |        |        | G  | 1223.8 | 612.4 | 1206.7 | 1205.8 | 11 |
| 2  | 171.1  |       |        |        | I  | 1166.7 | 583.9 | 1149.7 | 1148.7 | 10 |
| 3  | 270.2  |       |        |        | V  | 1053.7 | 527.3 | 1036.6 | 1035.7 | 9  |
| 4  | 383.3  |       |        |        | L  | 954.6  | 477.8 | 937.6  | 936.6  | 8  |
| 5  | 496.4  |       |        |        | L  | 841.5  | 421.3 | 824.5  | 823.5  | 7  |
| 6  | 625.4  | 313.2 |        | 607.4  | E  | 728.4  | 364.7 | 711.4  | 710.4  | 6  |
| 7  | 754.4  | 377.7 |        | 736.4  | E  | 599.4  |       | 582.4  | 581.4  | 5  |
| 8  | 867.5  | 434.3 |        | 849.5  | L  | 470.3  |       | 453.3  |        | 4  |
| 9  | 980.6  | 490.8 |        | 962.6  | L  | 357.3  |       | 340.2  |        | 3  |
| 10 | 1077.7 | 539.3 |        | 1059.7 | P  | 244.2  |       | 227.1  |        | 2  |
| 11 | 1223.8 | 612.4 | 1206.7 | 1205.8 | K  | 147.1  |       | 130.1  |        | 1  |

Gene symbol: Fkbp1a

Protein name: 14 days pregnant adult female placenta cDNA, RIKEN full-length enriched library, clone:I530022I01 product:FK506 binding protein 1a, full insert sequence

Protein accession numbers: IPI00653179

Peptide sequence: (R)GWEEGV AQMSVGQR(A)

Exclusive (unique to this protein): TRUE

SEQUEST XCorr score: 2.05 SEQUEST DCn score: 0.679

Fix modifications: None

Variable modifications: M9: Oxidation (+16.00)

charge: 2

Observed m/z: 775.3591

Actual minus calculated peptide mass (AMU): 0.0035358

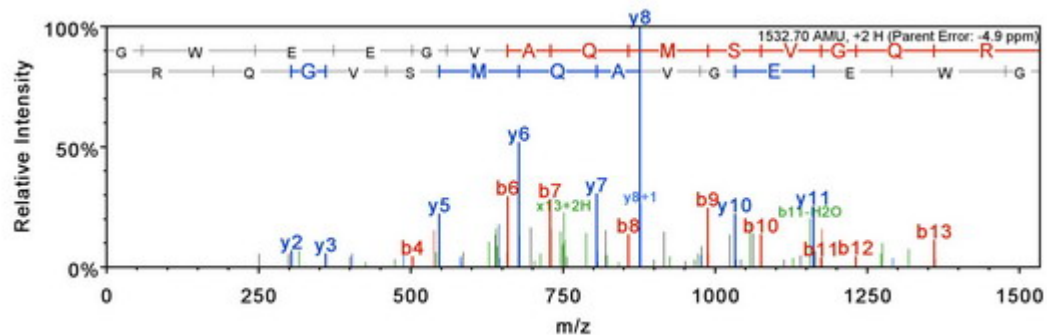

| B  | B Ions | B+2H  | B-NH3  | B-H2O  | AA | Y Ions | Y+2H  | Y-NH3  | Y-H2O  | Y  |
|----|--------|-------|--------|--------|----|--------|-------|--------|--------|----|
| 1  | 58.0   |       |        |        | G  | 1533.7 | 767.4 | 1516.7 | 1515.7 | 14 |
| 2  | 244.1  |       |        |        | W  | 1476.7 | 738.9 | 1459.7 | 1458.7 | 13 |
| 3  | 373.2  |       |        | 355.1  | E  | 1290.6 | 645.8 | 1273.6 | 1272.6 | 12 |
| 4  | 502.2  |       |        | 484.2  | E  | 1161.6 | 581.3 | 1144.5 | 1143.6 | 11 |
| 5  | 559.2  |       |        | 541.2  | G  | 1032.5 | 516.8 | 1015.5 | 1014.5 | 10 |
| 6  | 658.3  | 329.7 |        | 640.3  | V  | 975.5  | 488.3 | 958.5  | 957.5  | 9  |
| 7  | 729.3  | 365.2 |        | 711.3  | A  | 876.4  | 438.7 | 859.4  | 858.4  | 8  |
| 8  | 857.4  | 429.2 | 840.4  | 839.4  | Q  | 805.4  | 403.2 | 788.4  | 787.4  | 7  |
| 9  | 988.4  | 494.7 | 971.4  | 970.4  | M  | 677.3  | 339.2 | 660.3  | 659.3  | 6  |
| 10 | 1075.5 | 538.2 | 1058.4 | 1057.4 | S  | 546.3  |       | 529.3  | 528.3  | 5  |
| 11 | 1174.5 | 587.8 | 1157.5 | 1156.5 | V  | 459.3  |       | 442.2  |        | 4  |
| 12 | 1231.5 | 616.3 | 1214.5 | 1213.5 | G  | 360.2  |       | 343.2  |        | 3  |
| 13 | 1359.6 | 680.3 | 1342.6 | 1341.6 | Q  | 303.2  |       | 286.2  |        | 2  |
| 14 | 1533.7 | 767.4 | 1516.7 | 1515.7 | R  | 175.1  |       | 158.1  |        | 1  |

Gene symbol: Ganab

Protein name: Isoform 2 of Neutral alpha-glucosidase AB precursor

Protein accession numbers: IPI00115679

Peptide sequence: (R)LSFQHDPETSVLILR(K)

Exclusive (unique to this protein): TRUE

SEQUEST XCorr score: 2.71 SEQUEST DCn score: 0.583

Fix modifications: None

Variable modifications: None

charge: 2

Observed m/z: 877.9727

Actual minus calculated peptide mass (AMU): -0.0067152

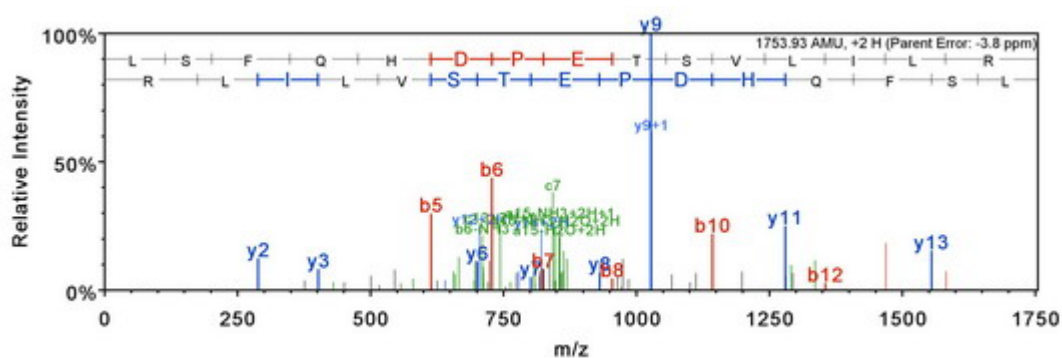

| B  | B ions | B+2H  | B-NH3  | B-H2O  | AA | Y ions | Y+2H  | Y-NH3  | Y-H2O  | Y  |
|----|--------|-------|--------|--------|----|--------|-------|--------|--------|----|
| 1  | 114.1  |       |        |        | L  | 1754.9 | 878.0 | 1737.9 | 1736.9 | 15 |
| 2  | 201.1  |       |        | 183.1  | S  | 1641.9 | 821.4 | 1624.8 | 1623.9 | 14 |
| 3  | 348.2  |       |        | 330.2  | F  | 1554.8 | 777.9 | 1537.8 | 1536.8 | 13 |
| 4  | 476.3  |       | 459.2  | 458.2  | Q  | 1407.8 | 704.4 | 1390.7 | 1389.8 | 12 |
| 5  | 613.3  | 307.2 | 596.3  | 595.3  | H  | 1279.7 | 640.4 | 1262.7 | 1261.7 | 11 |
| 6  | 728.3  | 364.7 | 711.3  | 710.3  | D  | 1142.6 | 571.8 | 1125.6 | 1124.6 | 10 |
| 7  | 825.4  | 413.2 | 808.4  | 807.4  | P  | 1027.6 | 514.3 | 1010.6 | 1009.6 | 9  |
| 8  | 954.4  | 477.7 | 937.4  | 936.4  | E  | 930.6  | 465.8 | 913.5  | 912.6  | 8  |
| 9  | 1055.5 | 528.2 | 1038.5 | 1037.5 | T  | 801.5  | 401.3 | 784.5  | 783.5  | 7  |
| 10 | 1142.5 | 571.8 | 1125.5 | 1124.5 | S  | 700.5  | 350.7 | 683.5  | 682.5  | 6  |
| 11 | 1241.6 | 621.3 | 1224.5 | 1223.6 | V  | 613.4  |       | 596.4  |        | 5  |
| 12 | 1354.7 | 677.8 | 1337.6 | 1336.7 | L  | 514.4  |       | 497.4  |        | 4  |
| 13 | 1467.8 | 734.4 | 1450.7 | 1449.7 | I  | 401.3  |       | 384.3  |        | 3  |
| 14 | 1580.8 | 790.9 | 1563.8 | 1562.8 | L  | 288.2  |       | 271.2  |        | 2  |
| 15 | 1754.9 | 878.0 | 1737.9 | 1736.9 | R  | 175.1  |       | 158.1  |        | 1  |

Gene symbol: Gclm

Protein name: Glutamate--cysteine ligase regulatory subunit

Protein accession numbers: IPI00114329

Peptide sequence: (K)TLNEWSSQISPDLVR(E)

Exclusive (unique to this protein): TRUE

SEQUEST XCorr score: 2.03 SEQUEST DCn score: 0.484

Fix modifications: None

Variable modifications: None

charge: 2

Observed m/z: 872.949

Actual minus calculated peptide mass (AMU): 0.003052

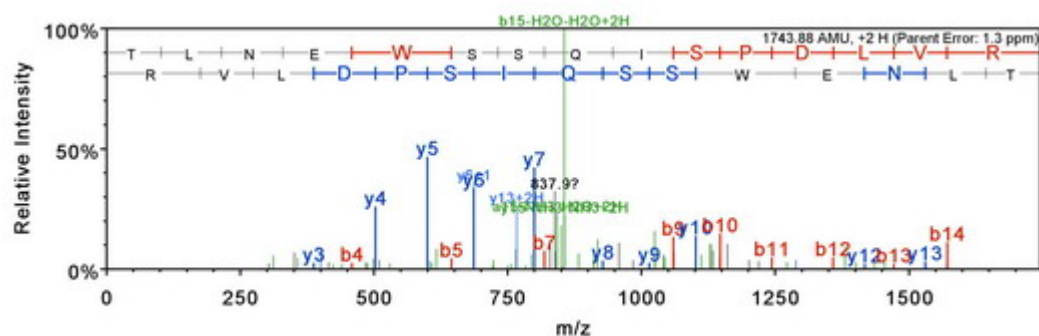

| B  | B ions | B+2H  | B-NH3  | B-H2O  | AA | Y ions | Y+2H  | Y-NH3  | Y-H2O  | Y  |
|----|--------|-------|--------|--------|----|--------|-------|--------|--------|----|
| 1  | 102.1  |       |        | 84.0   | T  | 1744.9 | 873.0 | 1727.9 | 1726.9 | 15 |
| 2  | 215.1  |       |        | 197.1  | L  | 1643.8 | 822.4 | 1626.8 | 1625.8 | 14 |
| 3  | 329.2  |       | 312.2  | 311.2  | N  | 1530.8 | 765.9 | 1513.7 | 1512.7 | 13 |
| 4  | 458.2  |       | 441.2  | 440.2  | E  | 1416.7 | 708.9 | 1399.7 | 1398.7 | 12 |
| 5  | 644.3  |       | 627.3  | 626.3  | W  | 1287.7 | 644.3 | 1270.6 | 1269.7 | 11 |
| 6  | 731.3  | 366.2 | 714.3  | 713.3  | S  | 1101.6 | 551.3 | 1084.6 | 1083.6 | 10 |
| 7  | 818.4  | 409.7 | 801.3  | 800.4  | S  | 1014.6 | 507.8 | 997.5  | 996.6  | 9  |
| 8  | 946.4  | 473.7 | 929.4  | 928.4  | Q  | 927.5  | 464.3 | 910.5  | 909.5  | 8  |
| 9  | 1059.5 | 530.3 | 1042.5 | 1041.5 | I  | 799.5  | 400.2 | 782.4  | 781.5  | 7  |
| 10 | 1146.5 | 573.8 | 1129.5 | 1128.5 | S  | 686.4  | 343.7 | 669.4  | 668.4  | 6  |
| 11 | 1243.6 | 622.3 | 1226.6 | 1225.6 | P  | 599.4  |       | 582.3  | 581.3  | 5  |
| 12 | 1358.6 | 679.8 | 1341.6 | 1340.6 | D  | 502.3  |       | 485.3  | 484.3  | 4  |
| 13 | 1471.7 | 736.4 | 1454.7 | 1453.7 | L  | 387.3  |       | 370.3  |        | 3  |
| 14 | 1570.8 | 785.9 | 1553.8 | 1552.8 | V  | 274.2  |       | 257.2  |        | 2  |
| 15 | 1744.9 | 873.0 | 1727.9 | 1726.9 | R  | 175.1  |       | 158.1  |        | 1  |

Gene symbol: Gda

Protein name: Guanine deaminase

Protein accession numbers: IPI00469987

Peptide sequence: (R)TPPLALVFR(G)

Exclusive (unique to this protein): TRUE

SEQUEST XCorr score: 2.02 SEQUEST DCn score: 0.428

Fix modifications: None

Variable modifications: None

charge: 2

Observed m/z: 507.3086

Actual minus calculated peptide mass (AMU): -0.005554



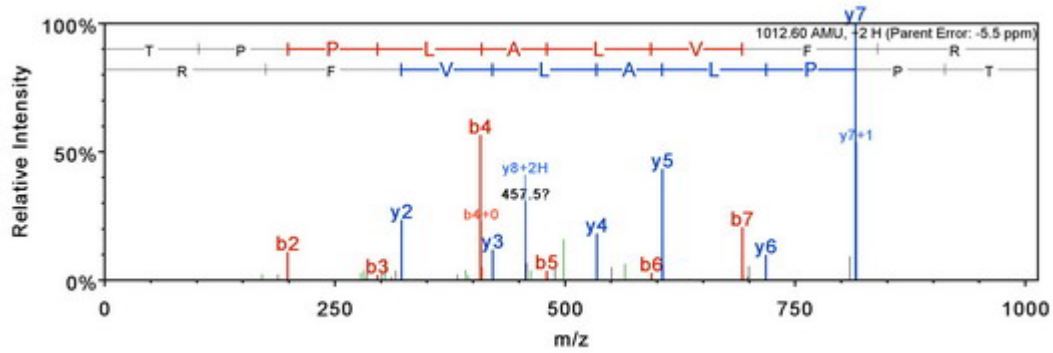

| B | B ions | B+2H  | B-NH3 | B-H2O | AA | Y ions | Y+2H  | Y-NH3 | Y-H2O | Y |
|---|--------|-------|-------|-------|----|--------|-------|-------|-------|---|
| 1 | 102.1  |       |       | 84.0  | T  | 1013.6 | 507.3 | 996.6 | 995.6 | 9 |
| 2 | 199.1  |       |       | 181.1 | P  | 912.6  | 456.8 | 895.5 |       | 8 |
| 3 | 296.2  |       |       | 278.2 | P  | 815.5  | 408.3 | 798.5 |       | 7 |
| 4 | 409.3  |       |       | 391.2 | L  | 718.5  | 359.7 | 701.4 |       | 6 |
| 5 | 480.3  |       |       | 462.3 | A  | 605.4  |       | 588.4 |       | 5 |
| 6 | 593.4  | 297.2 |       | 575.4 | L  | 534.3  |       | 517.3 |       | 4 |
| 7 | 692.4  | 346.7 |       | 674.4 | V  | 421.3  |       | 404.2 |       | 3 |
| 8 | 839.5  | 420.3 |       | 821.5 | F  | 322.2  |       | 305.2 |       | 2 |
| 9 | 1013.6 | 507.3 | 996.6 | 995.6 | R  | 175.1  |       | 158.1 |       | 1 |

Gene symbol: Gmppb

Protein name: 2 days neonate thymus thymic cells cDNA, RIKEN full-length enriched library, clone:E430010H19 product:GDP-MANNOSE PYROPHOSPHORYLASE B homolog

Protein accession numbers: IPI00113992

Peptide sequence: (R)LYSGPGIVGNVLVDPSAR(I)

Exclusive (unique to this protein): TRUE

SEQUEST XCorr score: 2.56 SEQUEST DCn score: 0.583

Fix modifications: None

Variable modifications: None

charge: 2

Observed m/z: 907.492

Actual minus calculated peptide mass (AMU): -0.005127

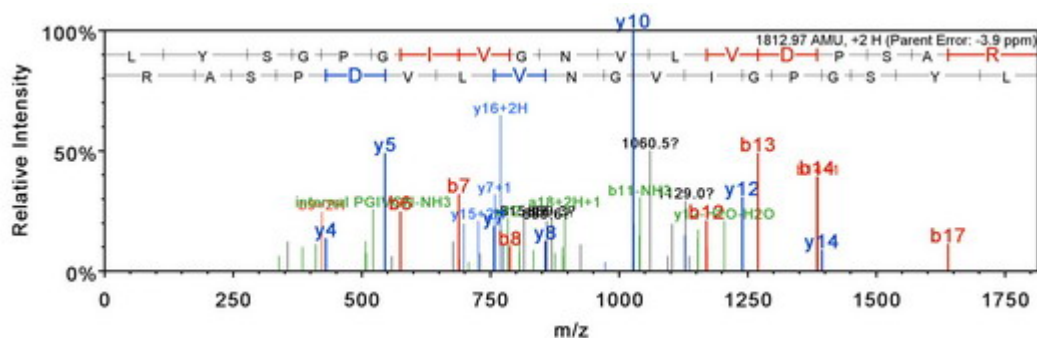

| B  | B Ions | B+2H  | B-NH3  | B-H2O  | AA | Y Ions | Y+2H  | Y-NH3  | Y-H2O  | Y  |
|----|--------|-------|--------|--------|----|--------|-------|--------|--------|----|
| 1  | 114.1  |       |        |        | L  | 1814.0 | 907.5 | 1797.0 | 1796.0 | 18 |
| 2  | 277.2  |       |        |        | Y  | 1700.9 | 851.0 | 1683.9 | 1682.9 | 17 |
| 3  | 364.2  |       |        | 346.2  | S  | 1537.8 | 769.4 | 1520.8 | 1519.8 | 16 |
| 4  | 421.2  |       |        | 403.2  | G  | 1450.8 | 725.9 | 1433.8 | 1432.8 | 15 |
| 5  | 518.3  |       |        | 500.3  | P  | 1393.8 | 697.4 | 1376.8 | 1375.8 | 14 |
| 6  | 575.3  | 288.2 |        | 557.3  | G  | 1296.7 | 648.9 | 1279.7 | 1278.7 | 13 |
| 7  | 688.4  | 344.7 |        | 670.4  | I  | 1239.7 | 620.4 | 1222.7 | 1221.7 | 12 |
| 8  | 787.4  | 394.2 |        | 769.4  | V  | 1126.6 | 563.8 | 1109.6 | 1108.6 | 11 |
| 9  | 844.5  | 422.7 |        | 826.5  | G  | 1027.5 | 514.3 | 1010.5 | 1009.5 | 10 |
| 10 | 958.5  | 479.8 | 941.5  | 940.5  | N  | 970.5  | 485.8 | 953.5  | 952.5  | 9  |
| 11 | 1057.6 | 529.3 | 1040.5 | 1039.6 | V  | 856.5  | 428.8 | 839.5  | 838.5  | 8  |
| 12 | 1170.7 | 585.8 | 1153.6 | 1152.6 | L  | 757.4  | 379.2 | 740.4  | 739.4  | 7  |
| 13 | 1269.7 | 635.4 | 1252.7 | 1251.7 | V  | 644.3  | 322.7 | 627.3  | 626.3  | 6  |
| 14 | 1384.8 | 692.9 | 1367.7 | 1366.7 | D  | 545.3  |       | 528.2  | 527.3  | 5  |
| 15 | 1481.8 | 741.4 | 1464.8 | 1463.8 | P  | 430.2  |       | 413.2  | 412.2  | 4  |
| 16 | 1568.8 | 784.9 | 1551.8 | 1550.8 | S  | 333.2  |       | 316.2  | 315.2  | 3  |
| 17 | 1639.9 | 820.4 | 1622.8 | 1621.9 | A  | 246.2  |       | 229.1  |        | 2  |
| 18 | 1814.0 | 907.5 | 1797.0 | 1796.0 | R  | 175.1  |       | 158.1  |        | 1  |

Gene symbol: Gnb1

Protein name: Guanine nucleotide-binding protein G(I)/G(S)/G(T) subunit beta 1

Protein accession numbers: IPI00120716

Peptide sequence: (K)ACADATLSQITNNIDPVGR(I)

Exclusive (unique to this protein): TRUE

SEQUEST XCorr score: 3.18 SEQUEST DCn score: 0.6

Fix modifications: C2: Carbamidomethyl (+57.02) Variable modifications: None

charge: 2

Observed m/z: 1008.4969

Actual minus calculated peptide mass (AMU): 0.0039054

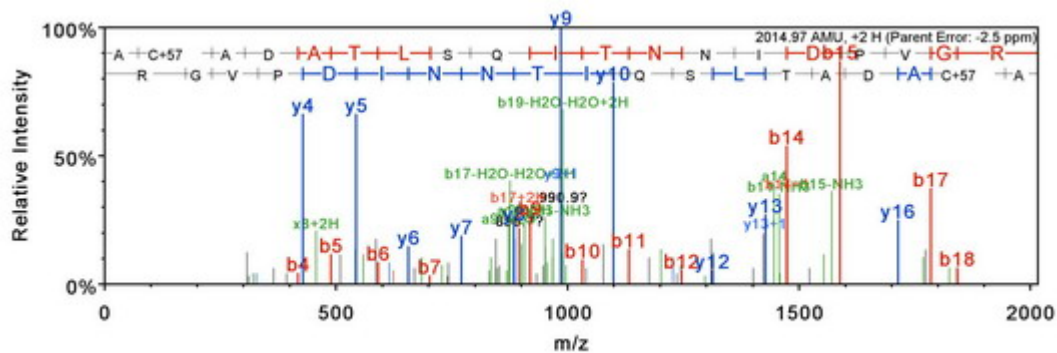

| B  | B Ions | B+2H   | B-NH3  | B-H2O  | AA   | Y Ions | Y+2H   | Y-NH3  | Y-H2O  | Y  |
|----|--------|--------|--------|--------|------|--------|--------|--------|--------|----|
| 1  | 72.0   |        |        |        | A    | 2016.0 | 1008.5 | 1999.0 | 1998.0 | 19 |
| 2  | 232.1  |        |        |        | C+57 | 1945.0 | 973.0  | 1927.9 | 1926.9 | 18 |
| 3  | 303.1  |        |        |        | A    | 1784.9 | 893.0  | 1767.9 | 1766.9 | 17 |
| 4  | 418.1  |        |        | 400.1  | D    | 1713.9 | 857.4  | 1696.9 | 1695.9 | 16 |
| 5  | 489.2  |        |        | 471.2  | A    | 1598.9 | 799.9  | 1581.8 | 1580.8 | 15 |
| 6  | 590.2  | 295.6  |        | 572.2  | T    | 1527.8 | 764.4  | 1510.8 | 1509.8 | 14 |
| 7  | 703.3  | 352.2  |        | 685.3  | L    | 1426.8 | 713.9  | 1409.7 | 1408.8 | 13 |
| 8  | 790.3  | 395.7  |        | 772.3  | S    | 1313.7 | 657.3  | 1296.7 | 1295.7 | 12 |
| 9  | 918.4  | 459.7  | 901.4  | 900.4  | Q    | 1226.7 | 613.8  | 1209.6 | 1208.6 | 11 |
| 10 | 1031.5 | 516.3  | 1014.5 | 1013.5 | I    | 1098.6 | 549.8  | 1081.6 | 1080.6 | 10 |
| 11 | 1132.5 | 566.8  | 1115.5 | 1114.5 | T    | 985.5  | 493.3  | 968.5  | 967.5  | 9  |
| 12 | 1246.6 | 623.8  | 1229.5 | 1228.6 | N    | 884.5  | 442.7  | 867.4  | 866.5  | 8  |
| 13 | 1360.6 | 680.8  | 1343.6 | 1342.6 | N    | 770.4  | 385.7  | 753.4  | 752.4  | 7  |
| 14 | 1473.7 | 737.4  | 1456.7 | 1455.7 | I    | 656.4  | 328.7  | 639.4  | 638.4  | 6  |
| 15 | 1588.7 | 794.9  | 1571.7 | 1570.7 | D    | 543.3  |        | 526.3  | 525.3  | 5  |
| 16 | 1685.8 | 843.4  | 1668.8 | 1667.8 | P    | 428.3  |        | 411.2  |        | 4  |
| 17 | 1784.9 | 892.9  | 1767.8 | 1766.8 | V    | 331.2  |        | 314.2  |        | 3  |
| 18 | 1841.9 | 921.4  | 1824.8 | 1823.9 | G    | 232.1  |        | 215.1  |        | 2  |
| 19 | 2016.0 | 1008.5 | 1999.0 | 1998.0 | R    | 175.1  |        | 158.1  |        | 1  |

Gene symbol: Grhpr

Protein name: Glyoxylate reductase/hydroxypyruvate reductase

Protein accession numbers: IPI00130530

Peptide sequence: (K)VFVTGPLPAEGR(A)

Exclusive (unique to this protein): TRUE

SEQUEST XCorr score: 2.2 SEQUEST DCn score: 0.543

Fix modifications: None

Variable modifications: None

charge: 2

Observed m/z: 621.8422

Actual minus calculated peptide mass (AMU): -0.008301

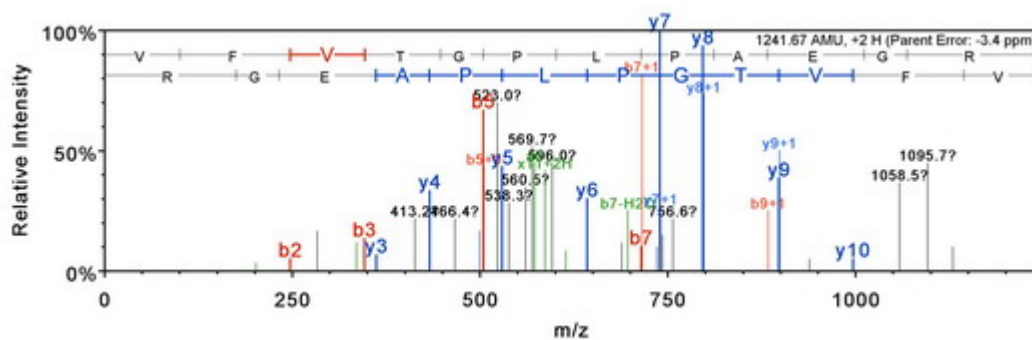

| B  | B Ions | B+2H  | B-NH3  | B-H2O  | AA | Y Ions | Y+2H  | Y-NH3  | Y-H2O  | Y  |
|----|--------|-------|--------|--------|----|--------|-------|--------|--------|----|
| 1  | 100.1  |       |        |        | V  | 1242.7 | 621.9 | 1225.7 | 1224.7 | 12 |
| 2  | 247.1  |       |        |        | F  | 1143.6 | 572.3 | 1126.6 | 1125.6 | 11 |
| 3  | 346.2  |       |        |        | V  | 996.6  | 498.8 | 979.5  | 978.5  | 10 |
| 4  | 447.3  |       |        | 429.3  | T  | 897.5  | 449.2 | 880.5  | 879.5  | 9  |
| 5  | 504.3  |       |        | 486.3  | G  | 796.4  | 398.7 | 779.4  | 778.4  | 8  |
| 6  | 601.3  | 301.2 |        | 583.3  | P  | 739.4  | 370.2 | 722.4  | 721.4  | 7  |
| 7  | 714.4  | 357.7 |        | 696.4  | L  | 642.4  | 321.7 | 625.3  | 624.4  | 6  |
| 8  | 811.5  | 406.2 |        | 793.5  | P  | 529.3  |       | 512.3  | 511.3  | 5  |
| 9  | 882.5  | 441.8 |        | 864.5  | A  | 432.2  |       | 415.2  | 414.2  | 4  |
| 10 | 1011.6 | 506.3 |        | 993.5  | E  | 361.2  |       | 344.2  | 343.2  | 3  |
| 11 | 1068.6 | 534.8 |        | 1050.6 | G  | 232.1  |       | 215.1  |        | 2  |
| 12 | 1242.7 | 621.9 | 1225.7 | 1224.7 | R  | 175.1  |       | 158.1  |        | 1  |

Gene symbol: Gsta4

Protein name: Glutathione S-transferase A4

Protein accession numbers: IPI00323911

Peptide sequence: (K)EKEESYDLILSR(A)

Exclusive (unique to this protein): TRUE

SEQUEST XCorr score: 2.88 SEQUEST DCn score: 0.663

Fix modifications: None

Variable modifications: None

charge: 2

Observed m/z: 741.3804

Actual minus calculated peptide mass (AMU): 0.004273

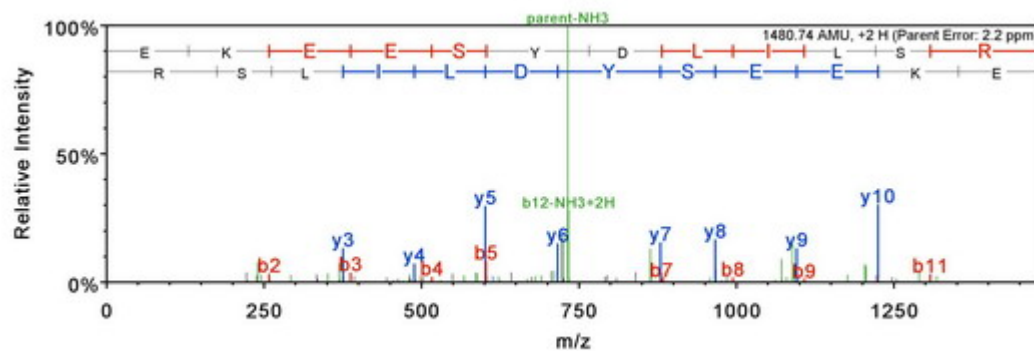

| B  | B Ions | B+2H  | B-NH3  | B-H2O  | AA | Y Ions | Y+2H  | Y-NH3  | Y-H2O  | Y  |
|----|--------|-------|--------|--------|----|--------|-------|--------|--------|----|
| 1  | 130.1  |       |        | 112.0  | E  | 1481.8 | 741.4 | 1464.7 | 1463.7 | 12 |
| 2  | 258.1  | 129.6 | 241.1  | 240.1  | K  | 1352.7 | 676.9 | 1335.7 | 1334.7 | 11 |
| 3  | 387.2  | 194.1 | 370.2  | 369.2  | E  | 1224.6 | 612.8 | 1207.6 | 1206.6 | 10 |
| 4  | 516.2  | 258.6 | 499.2  | 498.2  | E  | 1095.6 | 548.3 | 1078.5 | 1077.6 | 9  |
| 5  | 603.3  | 302.1 | 586.2  | 585.3  | S  | 966.5  | 483.8 | 949.5  | 948.5  | 8  |
| 6  | 766.3  | 383.7 | 749.3  | 748.3  | Y  | 879.5  | 440.3 | 862.5  | 861.5  | 7  |
| 7  | 881.4  | 441.2 | 864.3  | 863.3  | D  | 716.4  | 358.7 | 699.4  | 698.4  | 6  |
| 8  | 994.4  | 497.7 | 977.4  | 976.4  | L  | 601.4  |       | 584.4  | 583.4  | 5  |
| 9  | 1107.5 | 554.3 | 1090.5 | 1089.5 | I  | 488.3  |       | 471.3  | 470.3  | 4  |
| 10 | 1220.6 | 610.8 | 1203.6 | 1202.6 | L  | 375.2  |       | 358.2  | 357.2  | 3  |
| 11 | 1307.6 | 654.3 | 1290.6 | 1289.6 | S  | 262.1  |       | 245.1  | 244.1  | 2  |
| 12 | 1481.8 | 741.4 | 1464.7 | 1463.7 | R  | 175.1  |       | 158.1  |        | 1  |

Gene symbol: Guk1

Protein name: 18-day embryo whole body cDNA, RIKEN full-length enriched library, clone:1110048P09 product:guanylate kinase 1, full insert sequence

Protein accession numbers: IPI00228828

Peptide sequence: (R)ICVLDVLDLQGVR(S)

Exclusive (unique to this protein): TRUE

SEQUEST XCorr score: 2.1 SEQUEST DCn score: 0.581

Fix modifications: C2: Carbamidomethyl (+57.02)Variable modifications: None

charge: 2 Observed m/z: 693.8704

Actual minus calculated peptide mass (AMU): -0.008789

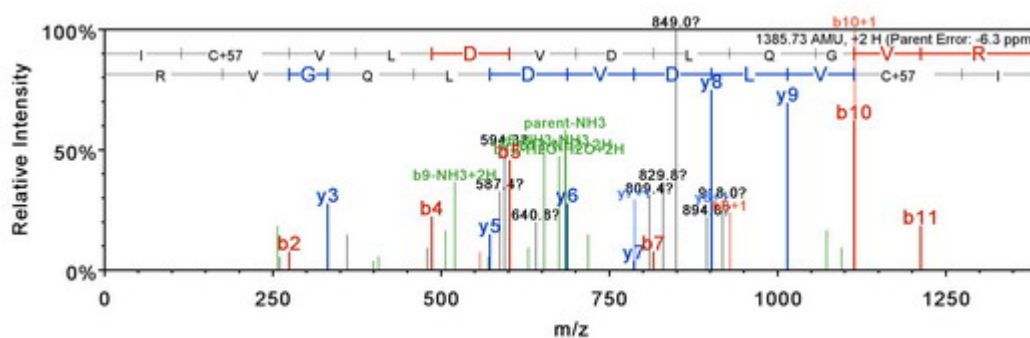

| B  | B ions | B+2H  | B-NH3  | B-H2O  | AA   | Y ions | Y+2H  | Y-NH3  | Y-H2O  | Y  |
|----|--------|-------|--------|--------|------|--------|-------|--------|--------|----|
| 1  | 114.1  |       |        |        | I    | 1386.7 | 693.9 | 1369.7 | 1368.7 | 12 |
| 2  | 274.1  |       |        |        | C+57 | 1273.7 | 637.3 | 1256.6 | 1255.7 | 11 |
| 3  | 373.2  |       |        |        | V    | 1113.6 | 557.3 | 1096.6 | 1095.6 | 10 |
| 4  | 486.3  |       |        |        | L    | 1014.6 | 507.8 | 997.5  | 996.6  | 9  |
| 5  | 601.3  |       |        | 583.3  | D    | 901.5  | 451.2 | 884.5  | 883.5  | 8  |
| 6  | 700.4  | 350.7 |        | 682.4  | V    | 786.5  | 393.7 | 769.4  | 768.4  | 7  |
| 7  | 815.4  | 408.2 |        | 797.4  | D    | 687.4  | 344.2 | 670.4  | 669.4  | 6  |
| 8  | 928.5  | 464.7 |        | 910.5  | L    | 572.4  |       | 555.3  |        | 5  |
| 9  | 1056.5 | 528.8 | 1039.5 | 1038.5 | Q    | 459.3  |       | 442.2  |        | 4  |
| 10 | 1113.6 | 557.3 | 1096.5 | 1095.5 | G    | 331.2  |       | 314.2  |        | 3  |
| 11 | 1212.6 | 606.8 | 1195.6 | 1194.6 | V    | 274.2  |       | 257.2  |        | 2  |
| 12 | 1386.7 | 693.9 | 1369.7 | 1368.7 | R    | 175.1  |       | 158.1  |        | 1  |

Gene symbol: Gyg

Protein name: Glycogenin-1

Protein accession numbers: IPI00264062

Peptide sequence: (R)MVVLTSPQVSDSMR(K)

Exclusive (unique to this protein): TRUE

SEQUEST XCorr score: 2 SEQUEST DCn score: 0.525

Fix modifications: None

Variable modifications: None

charge: 2 Observed m/z: 775.3872

Actual minus calculated peptide mass (AMU): -0.005249

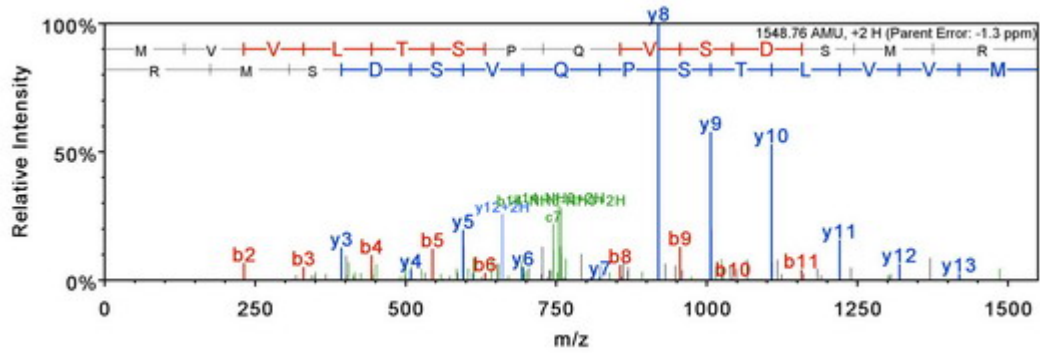

| B  | B Ions | B+2H  | B-NH3  | B-H2O  | AA | Y Ions | Y+2H  | Y-NH3  | Y-H2O  | Y  |
|----|--------|-------|--------|--------|----|--------|-------|--------|--------|----|
| 1  | 132.1  |       |        |        | M  | 1549.8 | 775.4 | 1532.8 | 1531.8 | 14 |
| 2  | 231.1  |       |        |        | V  | 1418.7 | 709.9 | 1401.7 | 1400.7 | 13 |
| 3  | 330.2  |       |        |        | V  | 1319.7 | 660.3 | 1302.6 | 1301.7 | 12 |
| 4  | 443.3  |       |        |        | L  | 1220.6 | 610.8 | 1203.6 | 1202.6 | 11 |
| 5  | 544.3  |       |        | 526.3  | T  | 1107.5 | 554.3 | 1090.5 | 1089.5 | 10 |
| 6  | 631.4  | 316.2 |        | 613.3  | S  | 1006.5 | 503.7 | 989.4  | 988.5  | 9  |
| 7  | 728.4  | 364.7 |        | 710.4  | P  | 919.4  | 460.2 | 902.4  | 901.4  | 8  |
| 8  | 856.5  | 428.7 | 839.4  | 838.5  | Q  | 822.4  | 411.7 | 805.4  | 804.4  | 7  |
| 9  | 955.5  | 478.3 | 938.5  | 937.5  | V  | 694.3  | 347.7 | 677.3  | 676.3  | 6  |
| 10 | 1042.6 | 521.8 | 1025.5 | 1024.5 | S  | 595.3  |       | 578.2  | 577.2  | 5  |
| 11 | 1157.6 | 579.3 | 1140.6 | 1139.6 | D  | 508.2  |       | 491.2  | 490.2  | 4  |
| 12 | 1244.6 | 622.8 | 1227.6 | 1226.6 | S  | 393.2  |       | 376.2  | 375.2  | 3  |
| 13 | 1375.7 | 688.3 | 1358.6 | 1357.7 | M  | 306.2  |       | 289.1  |        | 2  |
| 14 | 1549.8 | 775.4 | 1532.8 | 1531.8 | R  | 175.1  |       | 158.1  |        | 1  |

Gene symbol: H2-Ke6

Protein name: Isoform Short of Estradiol 17-beta-dehydrogenase 8

Protein accession numbers: IPI00115598,IPI00230550

Peptide sequence: (R)LAAEGAAVAACDLGAAAQD TVR(L)

Exclusive (unique to this protein): TRUE

SEQUEST XCorr score: 3.16 SEQUEST DCn score: 0.59

Fix modifications: C11: Carbamidomethyl (+57.02) Variable modifications: None

charge: 2

Observed m/z: 1108.5385

Actual minus calculated peptide mass (AMU): 0.0070758

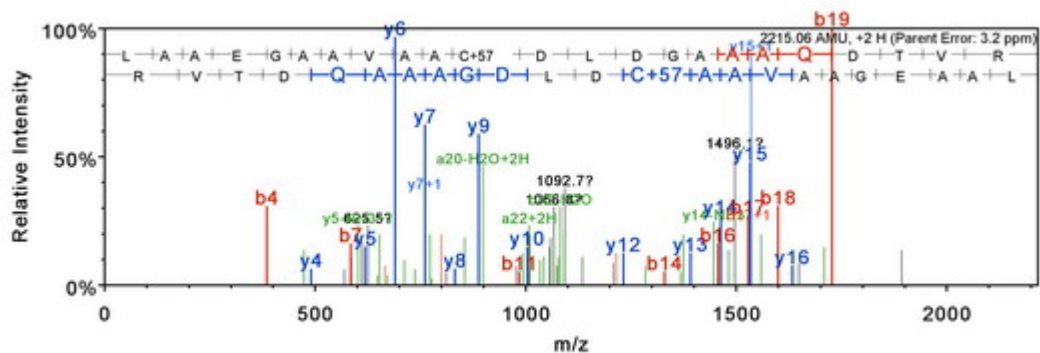

| B  | B ions | B+2H   | B-NH3  | B-H2O  | A,A  | Y ions | Y+2H   | Y-NH3  | Y-H2O  | Y  |
|----|--------|--------|--------|--------|------|--------|--------|--------|--------|----|
| 1  | 114.1  |        |        |        | L    | 2216.1 | 1108.5 | 2199.0 | 2198.1 | 23 |
| 2  | 185.1  |        |        |        | A    | 2103.0 | 1052.0 | 2085.9 | 2085.0 | 22 |
| 3  | 256.2  |        |        |        | A    | 2031.9 | 1016.5 | 2014.9 | 2013.9 | 21 |
| 4  | 385.2  |        |        | 367.2  | E    | 1960.9 | 981.0  | 1943.9 | 1942.9 | 20 |
| 5  | 442.2  |        |        | 424.2  | G    | 1831.9 | 916.4  | 1814.8 | 1813.9 | 19 |
| 6  | 513.3  | 257.1  |        | 495.3  | A    | 1774.8 | 887.9  | 1757.8 | 1756.8 | 18 |
| 7  | 584.3  | 292.7  |        | 566.3  | A    | 1703.8 | 852.4  | 1686.8 | 1685.8 | 17 |
| 8  | 683.4  | 342.2  |        | 665.4  | V    | 1632.8 | 816.9  | 1615.7 | 1614.8 | 16 |
| 9  | 754.4  | 377.7  |        | 736.4  | A    | 1533.7 | 767.4  | 1516.7 | 1515.7 | 15 |
| 10 | 825.5  | 413.2  |        | 807.4  | A    | 1462.7 | 731.8  | 1445.6 | 1444.7 | 14 |
| 11 | 985.5  | 493.2  |        | 967.5  | C+57 | 1391.6 | 696.3  | 1374.6 | 1373.6 | 13 |
| 12 | 1100.5 | 550.8  |        | 1082.5 | D    | 1231.6 | 616.3  | 1214.6 | 1213.6 | 12 |
| 13 | 1213.6 | 607.3  |        | 1195.6 | L    | 1116.6 | 558.8  | 1099.5 | 1098.5 | 11 |
| 14 | 1328.6 | 664.8  |        | 1310.6 | D    | 1003.5 | 502.2  | 986.5  | 985.5  | 10 |
| 15 | 1385.6 | 693.3  |        | 1367.6 | G    | 888.5  | 444.7  | 871.4  | 870.4  | 9  |
| 16 | 1456.7 | 728.8  |        | 1438.7 | A    | 831.4  | 416.2  | 814.4  | 813.4  | 8  |
| 17 | 1527.7 | 764.4  |        | 1509.7 | A    | 760.4  | 380.7  | 743.4  | 742.4  | 7  |
| 18 | 1598.8 | 799.9  |        | 1580.7 | A    | 689.4  | 345.2  | 672.3  | 671.4  | 6  |
| 19 | 1726.8 | 863.9  | 1709.8 | 1708.8 | Q    | 618.3  |        | 601.3  | 600.3  | 5  |
| 20 | 1841.8 | 921.4  | 1824.8 | 1823.8 | D    | 490.3  |        | 473.2  | 472.3  | 4  |
| 21 | 1942.9 | 971.9  | 1925.9 | 1924.9 | T    | 375.2  |        | 358.2  | 357.2  | 3  |
| 22 | 2042.0 | 1021.5 | 2024.9 | 2023.9 | V    | 274.2  |        | 257.2  |        | 2  |
| 23 | 2216.1 | 1108.5 | 2199.0 | 2198.1 | R    | 175.1  |        | 158.1  |        | 1  |

Gene symbol: Hadh

Protein name: Hydroxyacyl-coenzyme A dehydrogenase, mitochondrial precursor

Protein accession numbers: IPI00121105

Peptide sequence: (R)LLVPYLIEAVR(L)

Exclusive (unique to this protein): TRUE

SEQUEST XCorr score: 2.05 SEQUEST DCn score: 0.632

Fix modifications: None

Variable modifications: None

charge: 2

Observed m/z: 643.3992

Actual minus calculated peptide mass (AMU): 0.0021955

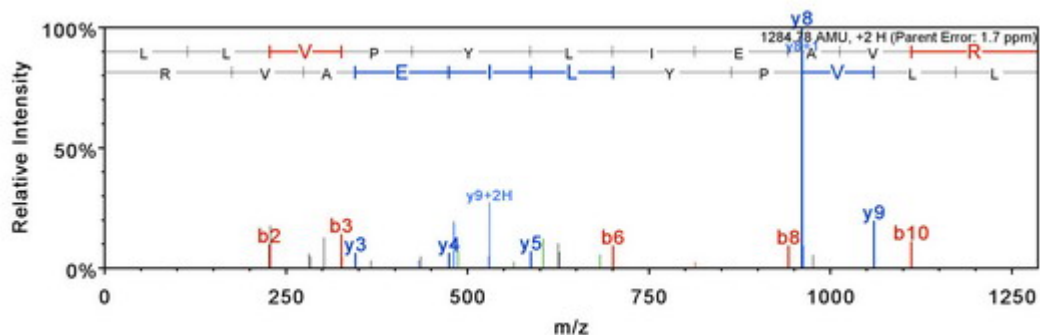

| B  | B Ions | B+2H  | B-NH3  | B-H2O  | AA | Y Ions | Y+2H  | Y-NH3  | Y-H2O  | Y  |
|----|--------|-------|--------|--------|----|--------|-------|--------|--------|----|
| 1  | 114.1  |       |        |        | L  | 1285.8 | 643.4 | 1268.8 | 1267.8 | 11 |
| 2  | 227.2  |       |        |        | L  | 1172.7 | 586.9 | 1155.7 | 1154.7 | 10 |
| 3  | 326.2  |       |        |        | V  | 1059.6 | 530.3 | 1042.6 | 1041.6 | 9  |
| 4  | 423.3  |       |        |        | P  | 960.6  | 480.8 | 943.5  | 942.5  | 8  |
| 5  | 586.4  |       |        |        | Y  | 863.5  | 432.3 | 846.5  | 845.5  | 7  |
| 6  | 699.4  | 350.2 |        |        | L  | 700.4  | 350.7 | 683.4  | 682.4  | 6  |
| 7  | 812.5  | 406.8 |        |        | I  | 587.4  |       | 570.3  | 569.3  | 5  |
| 8  | 941.6  | 471.3 |        | 923.6  | E  | 474.3  |       | 457.2  | 456.3  | 4  |
| 9  | 1012.6 | 506.8 |        | 994.6  | A  | 345.2  |       | 328.2  |        | 3  |
| 10 | 1111.7 | 556.3 |        | 1093.7 | V  | 274.2  |       | 257.2  |        | 2  |
| 11 | 1285.8 | 643.4 | 1268.8 | 1267.8 | R  | 175.1  |       | 158.1  |        | 1  |

Gene symbol: Hibadh

Protein name: 3-hydroxyisobutyrate dehydrogenase, mitochondrial precursor

Protein accession numbers: IPI00116222

Peptide sequence: (K)TPILLGSLAHQIYR(M)

Exclusive (unique to this protein): TRUE

SEQUEST XCorr score: 2.15 SEQUEST DCn score: 0.514

Fix modifications: None

Variable modifications: None

charge: 2

Observed m/z: 791.4611

Actual minus calculated peptide mass (AMU): 0.002319

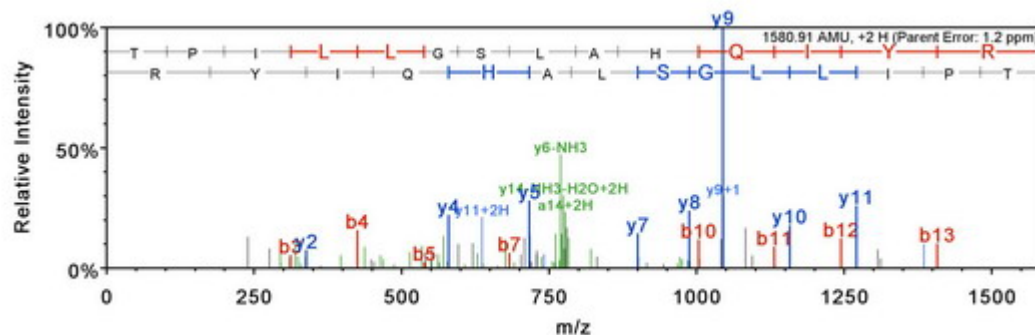

| B  | B Ions | B+2H  | B-NH3  | B-H2O  | AA | Y Ions | Y+2H  | Y-NH3  | Y-H2O  | Y  |
|----|--------|-------|--------|--------|----|--------|-------|--------|--------|----|
| 1  | 102.1  |       |        | 84.0   | T  | 1581.9 | 791.5 | 1564.9 | 1563.9 | 14 |
| 2  | 199.1  |       |        | 181.1  | P  | 1480.9 | 740.9 | 1463.8 | 1462.9 | 13 |
| 3  | 312.2  |       |        | 294.2  | I  | 1383.8 | 692.4 | 1366.8 | 1365.8 | 12 |
| 4  | 425.3  |       |        | 407.3  | L  | 1270.7 | 635.9 | 1253.7 | 1252.7 | 11 |
| 5  | 538.4  |       |        | 520.4  | L  | 1157.6 | 579.3 | 1140.6 | 1139.6 | 10 |
| 6  | 595.4  | 298.2 |        | 577.4  | G  | 1044.6 | 522.8 | 1027.5 | 1026.5 | 9  |
| 7  | 682.4  | 341.7 |        | 664.4  | S  | 987.5  | 494.3 | 970.5  | 969.5  | 8  |
| 8  | 795.5  | 398.3 |        | 777.5  | L  | 900.5  | 450.8 | 883.5  |        | 7  |
| 9  | 866.5  | 433.8 |        | 848.5  | A  | 787.4  | 394.2 | 770.4  |        | 6  |
| 10 | 1003.6 | 502.3 |        | 985.6  | H  | 716.4  | 358.7 | 699.4  |        | 5  |
| 11 | 1131.7 | 566.3 | 1114.6 | 1113.6 | Q  | 579.3  |       | 562.3  |        | 4  |
| 12 | 1244.7 | 622.9 | 1227.7 | 1226.7 | I  | 451.3  |       | 434.2  |        | 3  |
| 13 | 1407.8 | 704.4 | 1390.8 | 1389.8 | Y  | 338.2  |       | 321.2  |        | 2  |
| 14 | 1581.9 | 791.5 | 1564.9 | 1563.9 | R  | 175.1  |       | 158.1  |        | 1  |



Gene symbol: Hint1

Protein name: Histidine triad nucleotide-binding protein 1

Protein accession numbers: IPI00108189

Peptide sequence: (K)AQVAQPGGDTIFGK(I)

Exclusive (unique to this protein): TRUE

SEQUEST XCorr score: 2.32 SEQUEST DCn score: 0.626

Fix modifications: None

Variable modifications: None

charge: 2

Observed m/z: 694.8636

Actual minus calculated peptide mass (AMU): 0.001831

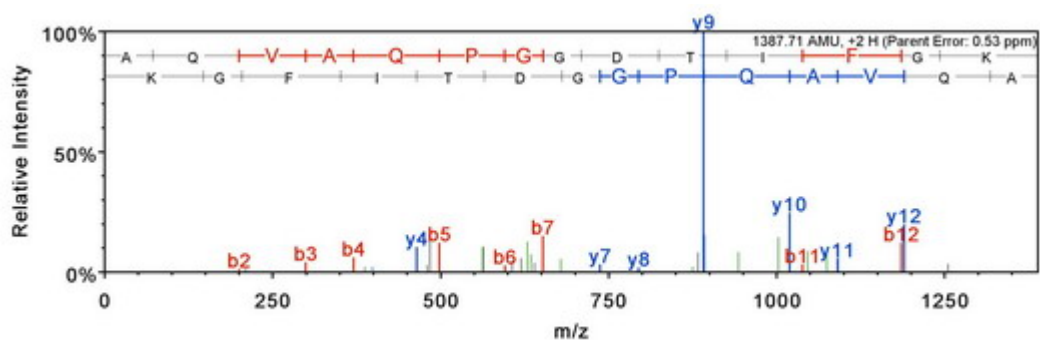

| B  | B ions | B+2H  | B-NH3  | B-H2O  | A,A | Y ions | Y+2H  | Y-NH3  | Y-H2O  | Y  |
|----|--------|-------|--------|--------|-----|--------|-------|--------|--------|----|
| 1  | 72.0   |       |        |        | A   | 1388.7 | 694.9 | 1371.7 | 1370.7 | 14 |
| 2  | 200.1  |       | 183.1  |        | Q   | 1317.7 | 659.3 | 1300.7 | 1299.7 | 13 |
| 3  | 299.2  |       | 282.2  |        | V   | 1189.6 | 595.3 | 1172.6 | 1171.6 | 12 |
| 4  | 370.2  |       | 353.2  |        | A   | 1090.5 | 545.8 | 1073.5 | 1072.5 | 11 |
| 5  | 498.3  |       | 481.2  |        | Q   | 1019.5 | 510.3 | 1002.5 | 1001.5 | 10 |
| 6  | 595.3  | 298.2 | 578.3  |        | P   | 891.5  | 446.2 | 874.4  | 873.5  | 9  |
| 7  | 652.3  | 326.7 | 635.3  |        | G   | 794.4  | 397.7 | 777.4  | 776.4  | 8  |
| 8  | 709.4  | 355.2 | 692.3  |        | G   | 737.4  | 369.2 | 720.4  | 719.4  | 7  |
| 9  | 824.4  | 412.7 | 807.4  | 806.4  | D   | 680.4  | 340.7 | 663.3  | 662.4  | 6  |
| 10 | 925.4  | 463.2 | 908.4  | 907.4  | T   | 565.3  |       | 548.3  | 547.3  | 5  |
| 11 | 1038.5 | 519.8 | 1021.5 | 1020.5 | I   | 464.3  |       | 447.3  |        | 4  |
| 12 | 1185.6 | 593.3 | 1168.6 | 1167.6 | F   | 351.2  |       | 334.2  |        | 3  |
| 13 | 1242.6 | 621.8 | 1225.6 | 1224.6 | G   | 204.1  |       | 187.1  |        | 2  |
| 14 | 1388.7 | 694.9 | 1371.7 | 1370.7 | K   | 147.1  |       | 130.1  |        | 1  |

Gene

symbol:

Hist1h2bl;Hist1h2bf;Hist1h2bj;Hist1h2bn;RP23-38E20.1;Hist1h2be;OTTMUSG00000013203;Hist1h2bc;Hist1h2bg;Hist1h2bb

Protein name: similar to Histone H2B F

Protein accession numbers: IPI00461514,IPI00752556

Peptide sequence: (K)AMGIMNSFVNDIFER(I)

Exclusive (unique to this protein): TRUE

SEQUEST XCorr score: 2.39 SEQUEST DCn score: 0.752

Fix modifications: None

Variable modifications: None

charge: 2

Observed m/z: 872.4142

Actual minus calculated peptide mass (AMU): 0.0008545

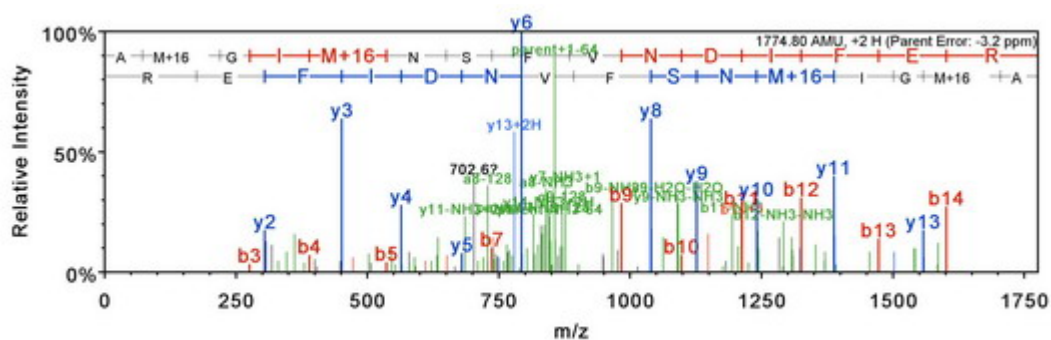

| B  | B Ions | B+2H  | B-NH3  | B-H2O  | AA   | Y Ions | Y+2H  | Y-NH3  | Y-H2O  | Y  |
|----|--------|-------|--------|--------|------|--------|-------|--------|--------|----|
| 1  | 72.0   |       |        |        | A    | 1775.8 | 888.4 | 1758.8 | 1757.8 | 15 |
| 2  | 219.1  |       |        |        | M+16 | 1704.8 | 852.9 | 1687.8 | 1686.8 | 14 |
| 3  | 276.1  |       |        |        | G    | 1557.7 | 779.4 | 1540.7 | 1539.7 | 13 |
| 4  | 389.2  |       |        |        | I    | 1500.7 | 750.9 | 1483.7 | 1482.7 | 12 |
| 5  | 536.2  |       |        |        | M+16 | 1387.6 | 694.3 | 1370.6 | 1369.6 | 11 |
| 6  | 650.3  | 325.6 | 633.2  |        | N    | 1240.6 | 620.8 | 1223.6 | 1222.6 | 10 |
| 7  | 737.3  | 369.2 | 720.3  | 719.3  | S    | 1126.5 | 563.8 | 1109.5 | 1108.5 | 9  |
| 8  | 884.4  | 442.7 | 867.3  | 866.4  | F    | 1039.5 | 520.3 | 1022.5 | 1021.5 | 8  |
| 9  | 983.4  | 492.2 | 966.4  | 965.4  | V    | 892.5  | 446.7 | 875.4  | 874.4  | 7  |
| 10 | 1097.5 | 549.2 | 1080.5 | 1079.5 | N    | 793.4  | 397.2 | 776.4  | 775.4  | 6  |
| 11 | 1212.5 | 606.8 | 1195.5 | 1194.5 | D    | 679.3  |       | 662.3  | 661.3  | 5  |
| 12 | 1325.6 | 663.3 | 1308.6 | 1307.6 | I    | 564.3  |       | 547.3  | 546.3  | 4  |
| 13 | 1472.7 | 736.8 | 1455.6 | 1454.6 | F    | 451.2  |       | 434.2  | 433.2  | 3  |
| 14 | 1601.7 | 801.4 | 1584.7 | 1583.7 | E    | 304.2  |       | 287.1  | 286.2  | 2  |
| 15 | 1775.8 | 888.4 | 1758.8 | 1757.8 | R    | 175.1  |       | 158.1  |        | 1  |

Gene symbol: Hmox2

Protein name: Heme oxygenase 2

Protein accession numbers: IPI00309322

Peptide sequence: (K)GTLGGSNCPFQTTVAVLR(K)

Exclusive (unique to this protein): TRUE

SEQUEST XCorr score: 2.24 SEQUEST DCn score: 0.479

Fix modifications: C8: Carbamidomethyl (+57.02) Variable modifications: None

charge: 2

Observed m/z: 939.4814

Actual minus calculated peptide mass (AMU): 0.0004883

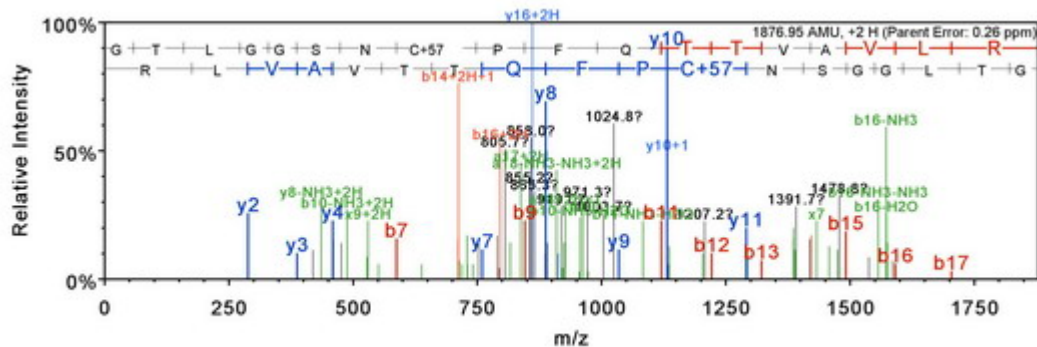

| B  | B Ions | B+2H  | B-NH3  | B-H2O  | AA   | Y Ions | Y+2H  | Y-NH3  | Y-H2O  | Y  |
|----|--------|-------|--------|--------|------|--------|-------|--------|--------|----|
| 1  | 58.0   |       |        |        | G    | 1878.0 | 939.5 | 1860.9 | 1859.9 | 18 |
| 2  | 159.1  |       |        | 141.1  | T    | 1820.9 | 911.0 | 1803.9 | 1802.9 | 17 |
| 3  | 272.2  |       |        | 254.2  | L    | 1719.9 | 860.5 | 1702.9 | 1701.9 | 16 |
| 4  | 329.2  |       |        | 311.2  | G    | 1606.8 | 803.9 | 1589.8 | 1588.8 | 15 |
| 5  | 386.2  |       |        | 368.2  | G    | 1549.8 | 775.4 | 1532.8 | 1531.8 | 14 |
| 6  | 473.2  | 237.1 |        | 455.2  | S    | 1492.8 | 746.9 | 1475.7 | 1474.8 | 13 |
| 7  | 587.3  | 294.1 | 570.3  | 569.3  | N    | 1405.7 | 703.4 | 1388.7 | 1387.7 | 12 |
| 8  | 747.3  | 374.2 | 730.3  | 729.3  | C+57 | 1291.7 | 646.4 | 1274.7 | 1273.7 | 11 |
| 9  | 844.4  | 422.7 | 827.3  | 826.4  | P    | 1131.7 | 566.3 | 1114.6 | 1113.6 | 10 |
| 10 | 991.4  | 496.2 | 974.4  | 973.4  | F    | 1034.6 | 517.8 | 1017.6 | 1016.6 | 9  |
| 11 | 1119.5 | 560.3 | 1102.5 | 1101.5 | Q    | 887.5  | 444.3 | 870.5  | 869.5  | 8  |
| 12 | 1220.5 | 610.8 | 1203.5 | 1202.5 | T    | 759.5  | 380.2 | 742.5  | 741.5  | 7  |
| 13 | 1321.6 | 661.3 | 1304.6 | 1303.6 | T    | 658.4  | 329.7 | 641.4  | 640.4  | 6  |
| 14 | 1420.7 | 710.8 | 1403.6 | 1402.6 | V    | 557.4  |       | 540.4  |        | 5  |
| 15 | 1491.7 | 746.4 | 1474.7 | 1473.7 | A    | 458.3  |       | 441.3  |        | 4  |
| 16 | 1590.8 | 795.9 | 1573.7 | 1572.8 | V    | 387.3  |       | 370.3  |        | 3  |
| 17 | 1703.8 | 852.4 | 1686.8 | 1685.8 | L    | 288.2  |       | 271.2  |        | 2  |
| 18 | 1878.0 | 939.5 | 1860.9 | 1859.9 | R    | 175.1  |       | 158.1  |        | 1  |

Gene symbol: Hpca

Protein name: Neuron-specific calcium-binding protein hippocalcin

Protein accession numbers: IPI00230310,IPI00230449

Peptide sequence: (R)TFDNTSDGTIDFR(E)

Exclusive (unique to this protein): TRUE

SEQUEST XCorr score: 2.09 SEQUEST DCn score: 0.809

Fix modifications: None

Variable modifications: None

charge: 2

Observed m/z: 744.8345

Actual minus calculated peptide mass (AMU): 0.0003662

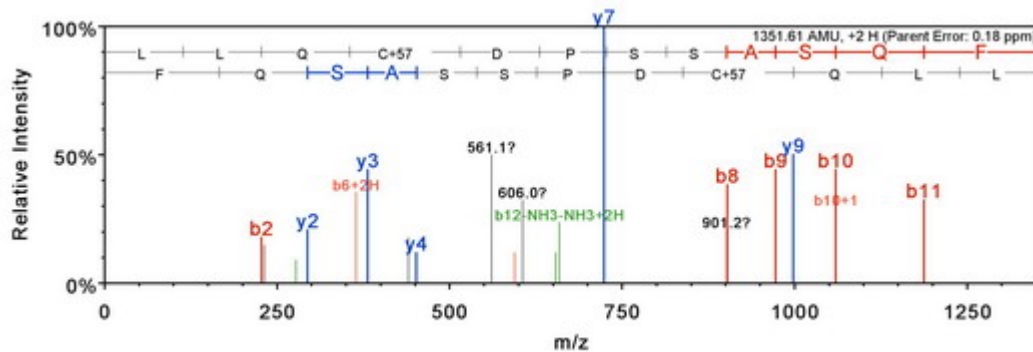

| B  | B Ions | B+2H  | B-NH3  | B-H2O  | AA   | Y Ions | Y+2H | Y-NH3  | Y-H2O  | Y  |
|----|--------|-------|--------|--------|------|--------|------|--------|--------|----|
| 1  | 114.1  |       |        |        | L    | 1352.6 |      | 1335.6 | 1334.6 | 12 |
| 2  | 227.2  |       |        |        | L    | 1239.5 |      | 1222.5 | 1221.5 | 11 |
| 3  | 355.2  |       | 338.2  |        | Q    | 1126.5 |      | 1109.4 | 1108.4 | 10 |
| 4  | 515.3  |       | 498.2  |        | C+57 | 998.4  |      | 981.4  | 980.4  | 9  |
| 5  | 630.3  |       | 613.3  | 612.3  | D    | 838.4  |      | 821.3  | 820.4  | 8  |
| 6  | 727.4  | 364.2 | 710.3  | 709.3  | P    | 723.3  |      | 706.3  | 705.3  | 7  |
| 7  | 814.4  | 407.7 | 797.4  | 796.4  | S    | 626.3  |      | 609.3  | 608.3  | 6  |
| 8  | 901.4  | 451.2 | 884.4  | 883.4  | S    | 539.3  |      | 522.2  | 521.2  | 5  |
| 9  | 972.5  | 486.7 | 955.4  | 954.4  | A    | 452.2  |      | 435.2  | 434.2  | 4  |
| 10 | 1059.5 | 530.2 | 1042.5 | 1041.5 | S    | 381.2  |      | 364.2  | 363.2  | 3  |
| 11 | 1187.5 | 594.3 | 1170.5 | 1169.5 | Q    | 294.2  |      | 277.1  |        | 2  |
| 12 | 1352.6 | 676.8 | 1335.6 | 1334.6 | F    | 166.1  |      |        |        | 1  |

Gene symbol: Hsd17b12

Protein name: Isoform 1 of Estradiol 17-beta-dehydrogenase 12

Protein accession numbers: IPI00119219,IPI00458208

Peptide sequence: (R)AFQVWCVGNEALVGPR(L)

Exclusive (unique to this protein): TRUE

SEQUEST XCorr score: 2.01 SEQUEST DCn score: 0.623

Fix modifications: C6: Carbamidomethyl (+57.02)Variable modifications: None

charge: 2

Observed m/z: 901.9552

Actual minus calculated peptide mass (AMU): 0.001343

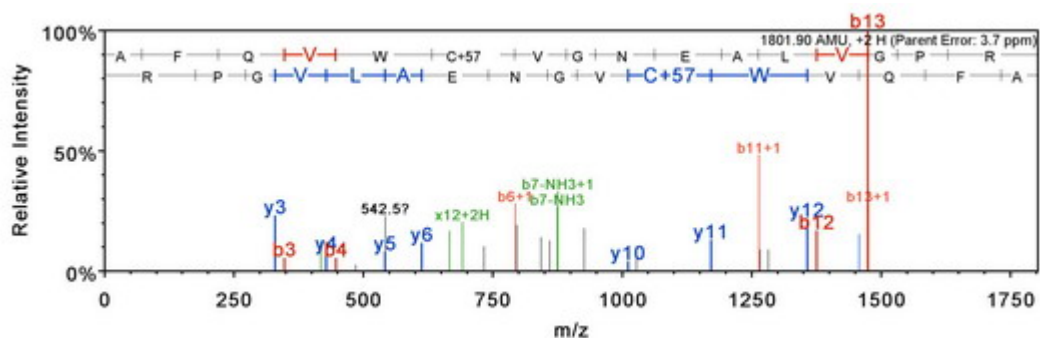

| B  | B Ions | B+2H  | B-NH3  | B-H2O  | AA   | Y Ions | Y+2H  | Y-NH3  | Y-H2O  | Y  |
|----|--------|-------|--------|--------|------|--------|-------|--------|--------|----|
| 1  | 72.0   |       |        |        | A    | 1802.9 | 902.0 | 1785.9 | 1784.9 | 16 |
| 2  | 219.1  |       |        |        | F    | 1731.9 | 866.4 | 1714.8 | 1713.9 | 15 |
| 3  | 347.2  |       | 330.2  |        | Q    | 1584.8 | 792.9 | 1567.8 | 1566.8 | 14 |
| 4  | 446.2  |       | 429.2  |        | V    | 1456.7 | 728.9 | 1439.7 | 1438.7 | 13 |
| 5  | 632.3  |       | 615.3  |        | W    | 1357.7 | 679.3 | 1340.6 | 1339.7 | 12 |
| 6  | 792.4  | 396.7 | 775.3  |        | C+57 | 1171.6 | 586.3 | 1154.6 | 1153.6 | 11 |
| 7  | 891.4  | 446.2 | 874.4  |        | V    | 1011.6 | 506.3 | 994.5  | 993.6  | 10 |
| 8  | 948.4  | 474.7 | 931.4  |        | G    | 912.5  | 456.8 | 895.5  | 894.5  | 9  |
| 9  | 1062.5 | 531.8 | 1045.5 |        | N    | 855.5  | 428.2 | 838.4  | 837.5  | 8  |
| 10 | 1191.5 | 596.3 | 1174.5 | 1173.5 | E    | 741.4  | 371.2 | 724.4  | 723.4  | 7  |
| 11 | 1262.6 | 631.8 | 1245.5 | 1244.5 | A    | 612.4  | 306.7 | 595.4  |        | 6  |
| 12 | 1375.7 | 688.3 | 1358.6 | 1357.6 | L    | 541.4  |       | 524.3  |        | 5  |
| 13 | 1474.7 | 737.9 | 1457.7 | 1456.7 | V    | 428.3  |       | 411.2  |        | 4  |
| 14 | 1531.7 | 766.4 | 1514.7 | 1513.7 | G    | 329.2  |       | 312.2  |        | 3  |
| 15 | 1628.8 | 814.9 | 1611.8 | 1610.8 | P    | 272.2  |       | 255.2  |        | 2  |
| 16 | 1802.9 | 902.0 | 1785.9 | 1784.9 | R    | 175.1  |       | 158.1  |        | 1  |

Gene symbol: Hspa9

Protein name: Stress-70 protein, mitochondrial precursor

Protein accession numbers: IPI00133903

Peptide sequence: (R)QATKDAGQISGLNVLR(V)

Exclusive (unique to this protein): TRUE

SEQUEST XCorr score: 2.28 SEQUEST DCn score: 0.395

Fix modifications: None

Variable modifications: None

charge: 2

Observed m/z: 835.9622

Actual minus calculated peptide mass (AMU): -0.002441

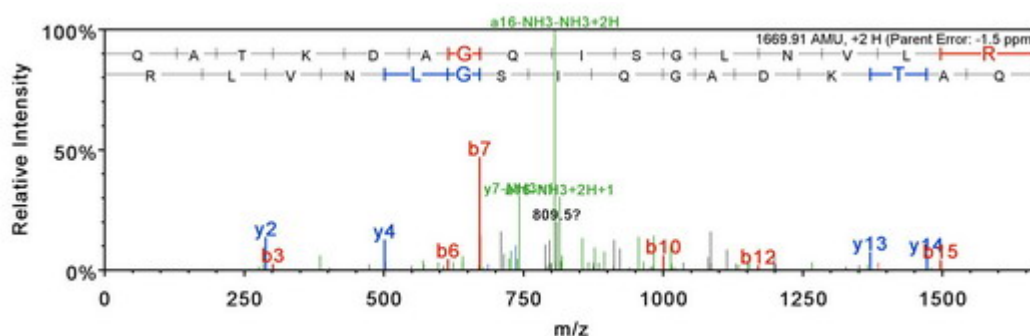

| B  | B ions | B+2H  | B-NH3  | B-H2O  | A,A | Y ions | Y+2H  | Y-NH3  | Y-H2O  | Y  |
|----|--------|-------|--------|--------|-----|--------|-------|--------|--------|----|
| 1  | 129.1  |       | 112.0  |        | Q   | 1670.9 | 836.0 | 1653.9 | 1652.9 | 16 |
| 2  | 200.1  |       | 183.1  |        | A   | 1542.9 | 771.9 | 1525.8 | 1524.9 | 15 |
| 3  | 301.2  |       | 284.1  | 283.1  | T   | 1471.8 | 736.4 | 1454.8 | 1453.8 | 14 |
| 4  | 429.3  | 215.1 | 412.2  | 411.2  | K   | 1370.8 | 685.9 | 1353.8 | 1352.8 | 13 |
| 5  | 544.3  | 272.6 | 527.3  | 526.3  | D   | 1242.7 | 621.8 | 1225.7 | 1224.7 | 12 |
| 6  | 615.3  | 308.2 | 598.3  | 597.3  | A   | 1127.7 | 564.3 | 1110.6 | 1109.6 | 11 |
| 7  | 672.3  | 336.7 | 655.3  | 654.3  | G   | 1056.6 | 528.8 | 1039.6 | 1038.6 | 10 |
| 8  | 800.4  | 400.7 | 783.4  | 782.4  | Q   | 999.6  | 500.3 | 982.6  | 981.6  | 9  |
| 9  | 913.5  | 457.2 | 896.5  | 895.5  | I   | 871.5  | 436.3 | 854.5  | 853.5  | 8  |
| 10 | 1000.5 | 500.8 | 983.5  | 982.5  | S   | 758.5  | 379.7 | 741.4  | 740.4  | 7  |
| 11 | 1057.5 | 529.3 | 1040.5 | 1039.5 | G   | 671.4  | 336.2 | 654.4  |        | 6  |
| 12 | 1170.6 | 585.8 | 1153.6 | 1152.6 | L   | 614.4  |       | 597.4  |        | 5  |
| 13 | 1284.7 | 642.8 | 1267.6 | 1266.6 | N   | 501.3  |       | 484.3  |        | 4  |
| 14 | 1383.7 | 692.4 | 1366.7 | 1365.7 | V   | 387.3  |       | 370.3  |        | 3  |
| 15 | 1496.8 | 748.9 | 1479.8 | 1478.8 | L   | 288.2  |       | 271.2  |        | 2  |
| 16 | 1670.9 | 836.0 | 1653.9 | 1652.9 | R   | 175.1  |       | 158.1  |        | 1  |

Gene symbol: Htra2

Protein name: Serine protease HTRA2, mitochondrial precursor

Protein accession numbers: IPI00275992,IPI00830249,IPI00830364,IPI00831347

Peptide sequence: (K)LAQNAEDVYEAVR(T)

Exclusive (unique to this protein): TRUE

SEQUEST XCorr score: 2.34 SEQUEST DCn score: 0.678

Fix modifications: None

Variable modifications: None

charge: 2

Observed m/z: 739.3662

Actual minus calculated peptide mass (AMU): -0.0040256

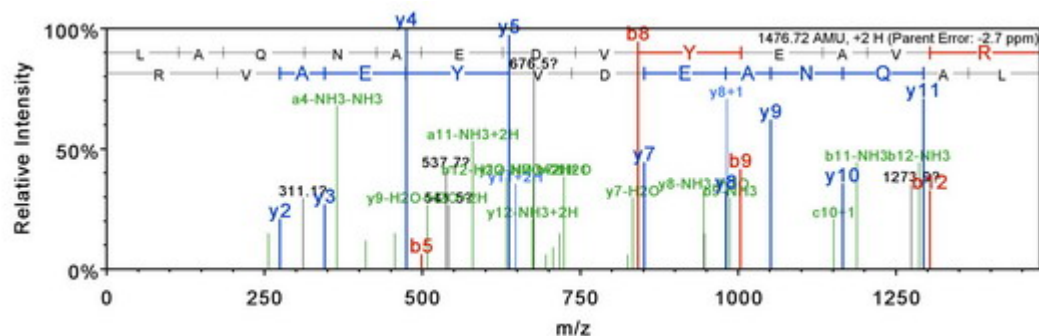

| B  | B ions | B+2H  | B-NH3  | B-H2O  | A,A | Y ions | Y+2H  | Y-NH3  | Y-H2O  | Y  |
|----|--------|-------|--------|--------|-----|--------|-------|--------|--------|----|
| 1  | 114.1  |       |        |        | L   | 1477.7 | 739.4 | 1460.7 | 1459.7 | 13 |
| 2  | 185.1  |       |        |        | A   | 1364.6 | 682.8 | 1347.6 | 1346.6 | 12 |
| 3  | 313.2  |       | 296.2  |        | Q   | 1293.6 | 647.3 | 1276.6 | 1275.6 | 11 |
| 4  | 427.2  |       | 410.2  |        | N   | 1165.5 | 583.3 | 1148.5 | 1147.5 | 10 |
| 5  | 498.3  |       | 481.2  |        | A   | 1051.5 | 526.3 | 1034.5 | 1033.5 | 9  |
| 6  | 627.3  | 314.2 | 610.3  | 609.3  | E   | 980.5  | 490.7 | 963.4  | 962.5  | 8  |
| 7  | 742.3  | 371.7 | 725.3  | 724.3  | D   | 851.4  | 426.2 | 834.4  | 833.4  | 7  |
| 8  | 841.4  | 421.2 | 824.4  | 823.4  | V   | 736.4  | 368.7 | 719.4  | 718.4  | 6  |
| 9  | 1004.5 | 502.7 | 987.4  | 986.5  | Y   | 637.3  |       | 620.3  | 619.3  | 5  |
| 10 | 1133.5 | 567.3 | 1116.5 | 1115.5 | E   | 474.3  |       | 457.2  | 456.3  | 4  |
| 11 | 1204.5 | 602.8 | 1187.5 | 1186.5 | A   | 345.2  |       | 328.2  |        | 3  |
| 12 | 1303.6 | 652.3 | 1286.6 | 1285.6 | V   | 274.2  |       | 257.2  |        | 2  |
| 13 | 1477.7 | 739.4 | 1460.7 | 1459.7 | R   | 175.1  |       | 158.1  |        | 1  |

Gene symbol: Iigp1

Protein name: Interferon-inducible GTPase 1

Protein accession numbers: IPI00323496,IPI00849310

Peptide sequence: (R)LARDWEIEVDQVEAMIK(S)

Exclusive (unique to this protein): TRUE

SEQUEST XCorr score: 2

SEQUEST DCn score: 0.133

Fix modifications: None

Variable modifications: None

charge: 2

Observed m/z: 1023.0154

Actual minus calculated peptide mass (AMU): -0.01505

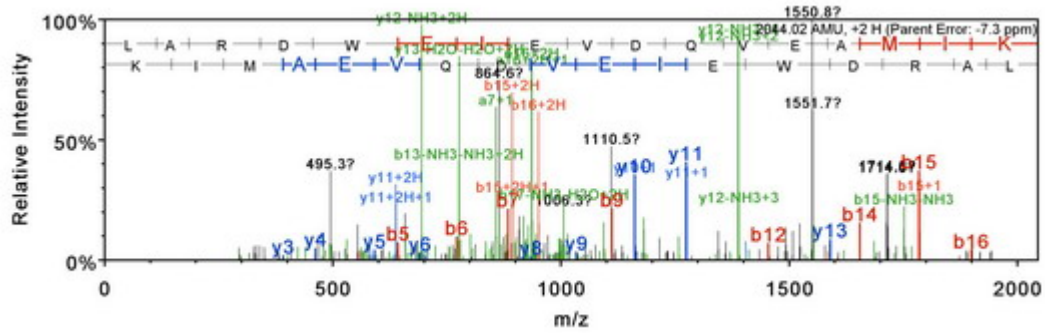

| B  | B Ions | B+2H   | B-NH3  | B-H2O  | AA | Y Ions | Y+2H   | Y-NH3  | Y-H2O  | Y  |
|----|--------|--------|--------|--------|----|--------|--------|--------|--------|----|
| 1  | 114.1  |        |        |        | L  | 2045.0 | 1023.0 | 2028.0 | 2027.0 | 17 |
| 2  | 185.1  |        |        |        | A  | 1932.0 | 966.5  | 1914.9 | 1913.9 | 16 |
| 3  | 341.2  | 171.1  | 324.2  |        | R  | 1860.9 | 931.0  | 1843.9 | 1842.9 | 15 |
| 4  | 456.3  | 228.6  | 439.2  | 438.3  | D  | 1704.8 | 852.9  | 1687.8 | 1686.8 | 14 |
| 5  | 642.3  | 321.7  | 625.3  | 624.3  | W  | 1589.8 | 795.4  | 1572.8 | 1571.8 | 13 |
| 6  | 771.4  | 386.2  | 754.4  | 753.4  | E  | 1403.7 | 702.4  | 1386.7 | 1385.7 | 12 |
| 7  | 884.5  | 442.7  | 867.4  | 866.5  | I  | 1274.7 | 637.8  | 1257.6 | 1256.7 | 11 |
| 8  | 1013.5 | 507.3  | 996.5  | 995.5  | E  | 1161.6 | 581.3  | 1144.6 | 1143.6 | 10 |
| 9  | 1112.6 | 556.8  | 1095.5 | 1094.6 | V  | 1032.5 | 516.8  | 1015.5 | 1014.5 | 9  |
| 10 | 1227.6 | 614.3  | 1210.6 | 1209.6 | D  | 933.5  | 467.2  | 916.5  | 915.5  | 8  |
| 11 | 1355.7 | 678.3  | 1338.6 | 1337.7 | Q  | 818.4  | 409.7  | 801.4  | 800.4  | 7  |
| 12 | 1454.7 | 727.9  | 1437.7 | 1436.7 | V  | 690.4  | 345.7  | 673.4  | 672.4  | 6  |
| 13 | 1583.8 | 792.4  | 1566.7 | 1565.8 | E  | 591.3  |        | 574.3  | 573.3  | 5  |
| 14 | 1654.8 | 827.9  | 1637.8 | 1636.8 | A  | 462.3  |        | 445.3  |        | 4  |
| 15 | 1785.9 | 893.4  | 1768.8 | 1767.8 | M  | 391.2  |        | 374.2  |        | 3  |
| 16 | 1898.9 | 950.0  | 1881.9 | 1880.9 | I  | 260.2  |        | 243.2  |        | 2  |
| 17 | 2045.0 | 1023.0 | 2028.0 | 2027.0 | K  | 147.1  |        | 130.1  |        | 1  |

Gene symbol: Immt

Protein name: Isoform 1 of Mitochondrial inner membrane protein

Protein accession numbers: IPI00228150,IPI00381412,IPI00381413,IPI00554845

Peptide sequence: (R)GIEQAVQSHAVAEER(K)

Exclusive (unique to this protein): TRUE

SEQUEST XCorr score: 3.42 SEQUEST DCn score: 0.601

Fix modifications: None

Variable modifications: None

charge: 2

Observed m/z: 912.4451

Actual minus calculated peptide mass (AMU): -0.0063456

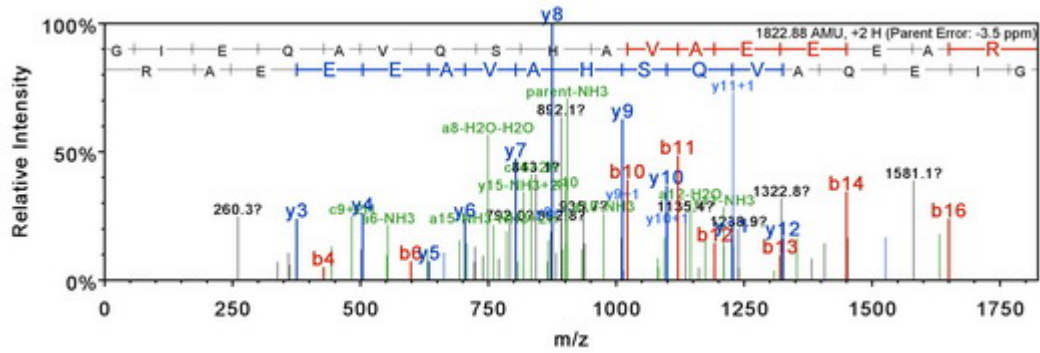

| B  | B ions | B+2H  | B-NH3  | B-H2O  | AA | Y ions | Y+2H  | Y-NH3  | Y-H2O  | Y  |
|----|--------|-------|--------|--------|----|--------|-------|--------|--------|----|
| 1  | 58.0   |       |        |        | G  | 1823.9 | 912.5 | 1806.9 | 1805.9 | 17 |
| 2  | 171.1  |       |        |        | I  | 1766.9 | 883.9 | 1749.8 | 1748.9 | 16 |
| 3  | 300.2  |       |        | 282.2  | E  | 1653.8 | 827.4 | 1636.8 | 1635.8 | 15 |
| 4  | 428.2  |       | 411.2  | 410.2  | Q  | 1524.7 | 762.9 | 1507.7 | 1506.7 | 14 |
| 5  | 499.3  |       | 482.2  | 481.2  | A  | 1396.7 | 698.8 | 1379.7 | 1378.7 | 13 |
| 6  | 598.3  | 299.7 | 581.3  | 580.3  | V  | 1325.6 | 663.3 | 1308.6 | 1307.6 | 12 |
| 7  | 726.4  | 363.7 | 709.4  | 708.4  | Q  | 1226.6 | 613.8 | 1209.5 | 1208.6 | 11 |
| 8  | 813.4  | 407.2 | 796.4  | 795.4  | S  | 1098.5 | 549.8 | 1081.5 | 1080.5 | 10 |
| 9  | 950.5  | 475.7 | 933.4  | 932.5  | H  | 1011.5 | 506.3 | 994.5  | 993.5  | 9  |
| 10 | 1021.5 | 511.3 | 1004.5 | 1003.5 | A  | 874.4  | 437.7 | 857.4  | 856.4  | 8  |
| 11 | 1120.6 | 560.8 | 1103.5 | 1102.6 | V  | 803.4  | 402.2 | 786.4  | 785.4  | 7  |
| 12 | 1191.6 | 596.3 | 1174.6 | 1173.6 | A  | 704.3  | 352.7 | 687.3  | 686.3  | 6  |
| 13 | 1320.7 | 660.8 | 1303.6 | 1302.6 | E  | 633.3  |       | 616.3  | 615.3  | 5  |
| 14 | 1449.7 | 725.4 | 1432.7 | 1431.7 | E  | 504.2  |       | 487.2  | 486.2  | 4  |
| 15 | 1578.7 | 789.9 | 1561.7 | 1560.7 | E  | 375.2  |       | 358.2  | 357.2  | 3  |
| 16 | 1649.8 | 825.4 | 1632.8 | 1631.8 | A  | 246.2  |       | 229.1  |        | 2  |
| 17 | 1823.9 | 912.5 | 1806.9 | 1805.9 | R  | 175.1  |       | 158.1  |        | 1  |

Gene symbol: Ints6

Protein name: Isoform 1 of Integrator complex subunit 6

Protein accession numbers: IPI00461472,IPI00798463

Peptide sequence: (R)GDRYMLVTFEPPYAIAK(A)

Exclusive (unique to this protein): TRUE

SEQUEST XCorr score: 2.01 SEQUEST DCn score: 0.197

Fix modifications: None

Variable modifications: M5: Oxidation (+16.00)

charge: 2 Observed m/z: 1023.0156

Actual minus calculated peptide mass (AMU): 0.017658



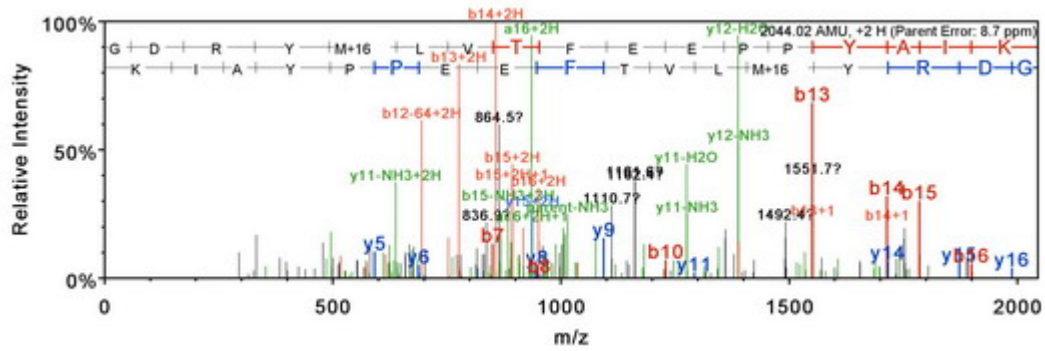

| B  | B ions | B+2H   | B-NH3  | B-H2O  | AA   | Y ions | Y+2H   | Y-NH3  | Y-H2O  | Y  |
|----|--------|--------|--------|--------|------|--------|--------|--------|--------|----|
| 1  | 58.0   |        |        |        | G    | 2045.0 | 1023.0 | 2028.0 | 2027.0 | 17 |
| 2  | 173.1  |        |        | 155.1  | D    | 1988.0 | 994.5  | 1971.0 | 1970.0 | 16 |
| 3  | 329.2  | 165.1  | 312.1  | 311.2  | R    | 1873.0 | 937.0  | 1855.9 | 1855.0 | 15 |
| 4  | 492.2  | 246.6  | 475.2  | 474.2  | Y    | 1716.9 | 858.9  | 1699.8 | 1698.9 | 14 |
| 5  | 639.3  | 320.1  | 622.2  | 621.3  | M+16 | 1553.8 | 777.4  | 1536.8 | 1535.8 | 13 |
| 6  | 752.3  | 376.7  | 735.3  | 734.3  | L    | 1406.8 | 703.9  | 1389.7 | 1388.8 | 12 |
| 7  | 851.4  | 426.2  | 834.4  | 833.4  | V    | 1293.7 | 647.3  | 1276.7 | 1275.7 | 11 |
| 8  | 952.5  | 476.7  | 935.4  | 934.5  | T    | 1194.6 | 597.8  | 1177.6 | 1176.6 | 10 |
| 9  | 1099.5 | 550.3  | 1082.5 | 1081.5 | F    | 1093.6 | 547.3  | 1076.5 | 1075.5 | 9  |
| 10 | 1228.6 | 614.8  | 1211.5 | 1210.6 | E    | 946.5  | 473.8  | 929.5  | 928.5  | 8  |
| 11 | 1357.6 | 679.3  | 1340.6 | 1339.6 | E    | 817.5  | 409.2  | 800.4  | 799.4  | 7  |
| 12 | 1454.7 | 727.8  | 1437.6 | 1436.7 | P    | 688.4  | 344.7  | 671.4  |        | 6  |
| 13 | 1551.7 | 776.4  | 1534.7 | 1533.7 | P    | 591.4  |        | 574.3  |        | 5  |
| 14 | 1714.8 | 857.9  | 1697.8 | 1696.8 | Y    | 494.3  |        | 477.3  |        | 4  |
| 15 | 1785.8 | 893.4  | 1768.8 | 1767.8 | A    | 331.2  |        | 314.2  |        | 3  |
| 16 | 1898.9 | 950.0  | 1881.9 | 1880.9 | I    | 260.2  |        | 243.2  |        | 2  |
| 17 | 2045.0 | 1023.0 | 2028.0 | 2027.0 | K    | 147.1  |        | 130.1  |        | 1  |

Gene symbol: Itgb4bp

Protein name: Eukaryotic translation initiation factor 6

Protein accession numbers: IPI00115862

Peptide sequence: (R)ASFENNCEVGCFAK(L)

Exclusive (unique to this protein): TRUE

SEQUEST XCorr score: 2.45 SEQUEST DCn score: 0.709

Fix modifications: C7: Carbamidomethyl (+57.02), C11: Carbamidomethyl (+57.02) Variable modifications: None

charge: 2

Observed m/z: 816.8444

Actual minus calculated peptide mass (AMU): 0.002319

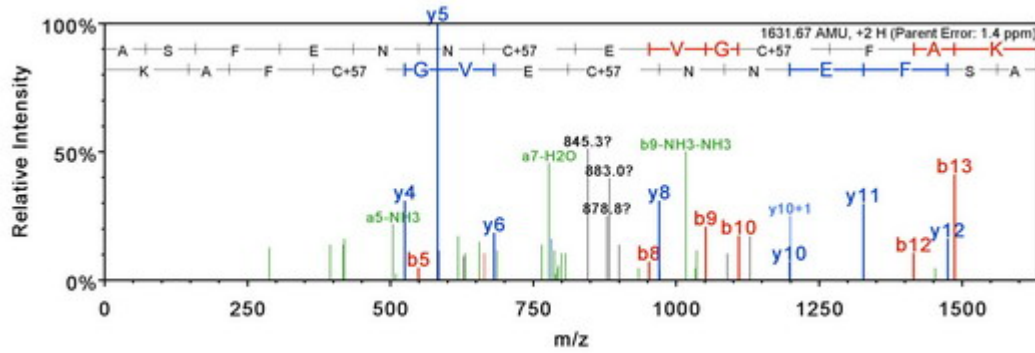

| B  | B ions | B+2H  | B-NH3  | B-H2O  | AA   | Y ions | Y+2H  | Y-NH3  | Y-H2O  | Y  |
|----|--------|-------|--------|--------|------|--------|-------|--------|--------|----|
| 1  | 72.0   |       |        |        | A    | 1632.7 | 816.8 | 1615.7 | 1614.7 | 14 |
| 2  | 159.1  |       |        | 141.1  | S    | 1561.6 | 781.3 | 1544.6 | 1543.6 | 13 |
| 3  | 306.2  |       |        | 288.1  | F    | 1474.6 | 737.8 | 1457.6 | 1456.6 | 12 |
| 4  | 435.2  |       |        | 417.2  | E    | 1327.5 | 664.3 | 1310.5 | 1309.5 | 11 |
| 5  | 549.2  |       | 532.2  | 531.2  | N    | 1198.5 | 599.8 | 1181.5 | 1180.5 | 10 |
| 6  | 663.3  | 332.1 | 646.3  | 645.3  | N    | 1084.5 | 542.7 | 1067.4 | 1066.5 | 9  |
| 7  | 823.3  | 412.2 | 806.3  | 805.3  | C+57 | 970.4  | 485.7 | 953.4  | 952.4  | 8  |
| 8  | 952.4  | 476.7 | 935.3  | 934.3  | E    | 810.4  | 405.7 | 793.4  | 792.4  | 7  |
| 9  | 1051.4 | 526.2 | 1034.4 | 1033.4 | V    | 681.3  | 341.2 | 664.3  |        | 6  |
| 10 | 1108.4 | 554.7 | 1091.4 | 1090.4 | G    | 582.3  |       | 565.2  |        | 5  |
| 11 | 1268.5 | 634.7 | 1251.4 | 1250.5 | C+57 | 525.3  |       | 508.2  |        | 4  |
| 12 | 1415.5 | 708.3 | 1398.5 | 1397.5 | F    | 365.2  |       | 348.2  |        | 3  |
| 13 | 1486.6 | 743.8 | 1469.5 | 1468.6 | A    | 218.2  |       | 201.1  |        | 2  |
| 14 | 1632.7 | 816.8 | 1615.7 | 1614.7 | K    | 147.1  |       | 130.1  |        | 1  |

Gene symbol: Klk7

Protein name: Kallikrein-7 precursor

Protein accession numbers: IPI00126800

Peptide sequence: (K)THVNDIMLVRLEDPVK(M)

Exclusive (unique to this protein): TRUE

SEQUEST XCorr score: 2.16 SEQUEST DCn score: 0.52

Fix modifications: None

Variable modifications: M7: Oxidation (+16.00)

charge: 2 Observed m/z: 948.0143

Actual minus calculated peptide mass (AMU): 0.01453

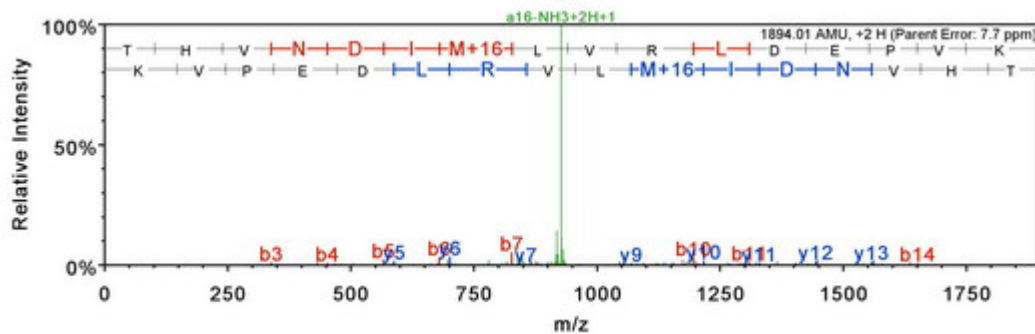

| B  | B Ions | B+2H  | B-NH3  | B-H2O  | AA   | Y Ions | Y+2H  | Y-NH3  | Y-H2O  | Y  |
|----|--------|-------|--------|--------|------|--------|-------|--------|--------|----|
| 1  | 102.1  |       |        | 84.0   | T    | 1895.0 | 948.0 | 1878.0 | 1877.0 | 16 |
| 2  | 239.1  | 120.1 |        | 221.1  | H    | 1794.0 | 897.5 | 1776.9 | 1776.0 | 15 |
| 3  | 338.2  | 169.6 |        | 320.2  | V    | 1656.9 | 829.0 | 1639.9 | 1638.9 | 14 |
| 4  | 452.2  | 226.6 | 435.2  | 434.2  | N    | 1557.8 | 779.4 | 1540.8 | 1539.8 | 13 |
| 5  | 567.3  | 284.1 | 550.2  | 549.2  | D    | 1443.8 | 722.4 | 1426.8 | 1425.8 | 12 |
| 6  | 680.3  | 340.7 | 663.3  | 662.3  | I    | 1328.8 | 664.9 | 1311.7 | 1310.8 | 11 |
| 7  | 827.4  | 414.2 | 810.4  | 809.4  | M+16 | 1215.7 | 608.3 | 1198.7 | 1197.7 | 10 |
| 8  | 940.5  | 470.7 | 923.4  | 922.5  | L    | 1068.6 | 534.8 | 1051.6 | 1050.6 | 9  |
| 9  | 1039.5 | 520.3 | 1022.5 | 1021.5 | V    | 955.6  | 478.3 | 938.5  | 937.6  | 8  |
| 10 | 1195.6 | 598.3 | 1178.6 | 1177.6 | R    | 856.5  | 428.8 | 839.5  | 838.5  | 7  |
| 11 | 1308.7 | 654.9 | 1291.7 | 1290.7 | L    | 700.4  | 350.7 | 683.4  | 682.4  | 6  |
| 12 | 1423.7 | 712.4 | 1406.7 | 1405.7 | D    | 587.3  |       | 570.3  | 569.3  | 5  |
| 13 | 1552.8 | 776.9 | 1535.8 | 1534.8 | E    | 472.3  |       | 455.3  | 454.3  | 4  |
| 14 | 1649.8 | 825.4 | 1632.8 | 1631.8 | P    | 343.2  |       | 326.2  |        | 3  |
| 15 | 1748.9 | 875.0 | 1731.9 | 1730.9 | V    | 246.2  |       | 229.2  |        | 2  |
| 16 | 1895.0 | 948.0 | 1878.0 | 1877.0 | K    | 147.1  |       | 130.1  |        | 1  |

Gene symbol: Krt1

Protein name: Keratin, type II cytoskeletal 1

Protein accession numbers: IPI00625729,IPI00828242

Peptide sequence: (R)FLEQQNQVLQTK(W)

Exclusive (unique to this protein): TRUE

SEQUEST XCorr score: 2 SEQUEST DCn score: 0.382

Fix modifications: None

Variable modifications: None

charge: 2

Observed m/z: 738.3942

Actual minus calculated peptide mass (AMU): -0.005371

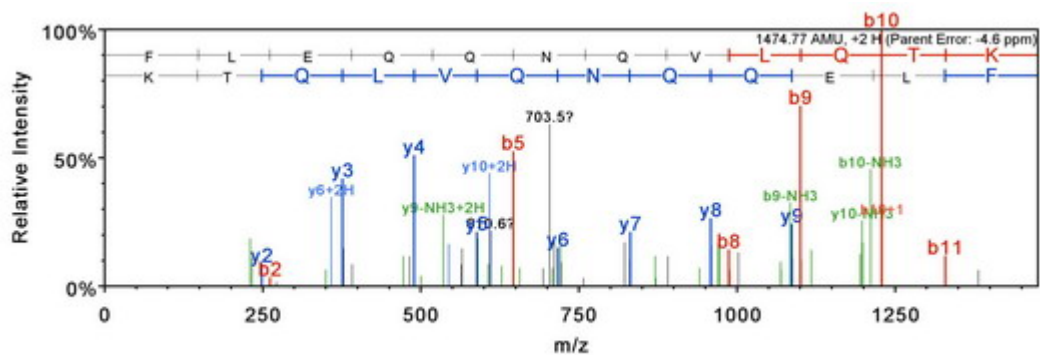

| B  | B Ions | B+2H  | B-NH3  | B-H2O  | AA | Y Ions | Y+2H  | Y-NH3  | Y-H2O  | Y  |
|----|--------|-------|--------|--------|----|--------|-------|--------|--------|----|
| 1  | 148.1  |       |        |        | F  | 1475.8 | 738.4 | 1458.8 | 1457.8 | 12 |
| 2  | 261.2  |       |        |        | L  | 1328.7 | 664.9 | 1311.7 | 1310.7 | 11 |
| 3  | 390.2  |       |        | 372.2  | E  | 1215.6 | 608.3 | 1198.6 | 1197.6 | 10 |
| 4  | 518.3  |       | 501.2  | 500.3  | Q  | 1086.6 | 543.8 | 1069.6 | 1068.6 | 9  |
| 5  | 646.3  |       | 629.3  | 628.3  | Q  | 958.5  | 479.8 | 941.5  | 940.5  | 8  |
| 6  | 760.4  | 380.7 | 743.3  | 742.4  | N  | 830.5  | 415.7 | 813.5  | 812.5  | 7  |
| 7  | 888.4  | 444.7 | 871.4  | 870.4  | Q  | 716.4  | 358.7 | 699.4  | 698.4  | 6  |
| 8  | 987.5  | 494.3 | 970.5  | 969.5  | V  | 588.4  |       | 571.4  | 570.4  | 5  |
| 9  | 1100.6 | 550.8 | 1083.5 | 1082.6 | L  | 489.3  |       | 472.3  | 471.3  | 4  |
| 10 | 1228.6 | 614.8 | 1211.6 | 1210.6 | Q  | 376.2  |       | 359.2  | 358.2  | 3  |
| 11 | 1329.7 | 665.3 | 1312.7 | 1311.7 | T  | 248.2  |       | 231.1  | 230.2  | 2  |
| 12 | 1475.8 | 738.4 | 1458.8 | 1457.8 | K  | 147.1  |       | 130.1  |        | 1  |

Gene symbol: Krt14

Protein name: Type I epidermal keratin (Fragment)

Protein accession numbers: IPI00828528

Peptide sequence: (R)LLEGEDAHLSSSQFSSGSQSSR(D)

Exclusive (unique to this protein): TRUE

SEQUEST XCorr score: 2.06 SEQUEST DCn score: 0.518

Fix modifications: None

Variable modifications: None

charge: 2

Observed m/z: 1155.0376

Actual minus calculated peptide mass (AMU): 0.00293

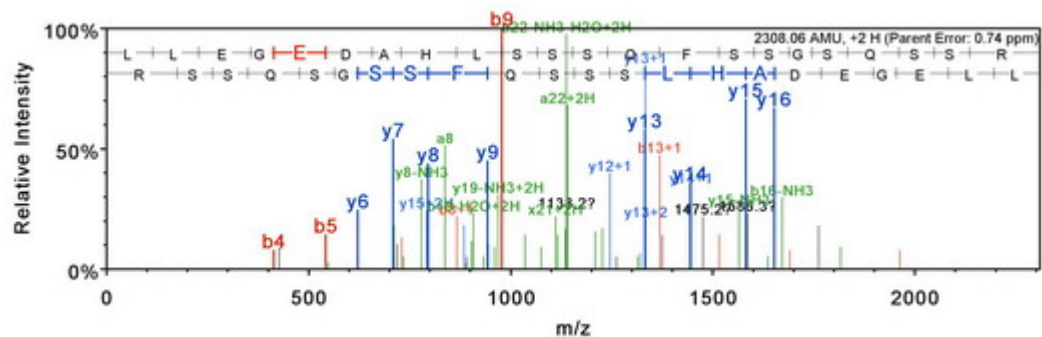

| B  | B Ions | B+2H   | B-NH3  | B-H2O  | AA | Y Ions | Y+2H   | Y-NH3  | Y-H2O  | Y  |
|----|--------|--------|--------|--------|----|--------|--------|--------|--------|----|
| 1  | 114.1  |        |        |        | L  | 2309.1 | 1155.0 | 2292.0 | 2291.1 | 22 |
| 2  | 227.2  |        |        |        | L  | 2196.0 | 1098.5 | 2178.9 | 2178.0 | 21 |
| 3  | 356.2  |        |        | 338.2  | E  | 2082.9 | 1042.0 | 2065.9 | 2064.9 | 20 |
| 4  | 413.2  |        |        | 395.2  | G  | 1953.9 | 977.4  | 1936.8 | 1935.8 | 19 |
| 5  | 542.3  |        |        | 524.3  | E  | 1896.8 | 948.9  | 1879.8 | 1878.8 | 18 |
| 6  | 657.3  | 329.2  |        | 639.3  | D  | 1767.8 | 884.4  | 1750.8 | 1749.8 | 17 |
| 7  | 728.4  | 364.7  |        | 710.3  | A  | 1652.8 | 826.9  | 1635.7 | 1634.8 | 16 |
| 8  | 865.4  | 433.2  |        | 847.4  | H  | 1581.7 | 791.4  | 1564.7 | 1563.7 | 15 |
| 9  | 978.5  | 489.8  |        | 960.5  | L  | 1444.7 | 722.8  | 1427.6 | 1426.7 | 14 |
| 10 | 1065.5 | 533.3  |        | 1047.5 | S  | 1331.6 | 666.3  | 1314.6 | 1313.6 | 13 |
| 11 | 1152.5 | 576.8  |        | 1134.5 | S  | 1244.5 | 622.8  | 1227.5 | 1226.5 | 12 |
| 12 | 1239.6 | 620.3  |        | 1221.6 | S  | 1157.5 | 579.3  | 1140.5 | 1139.5 | 11 |
| 13 | 1367.6 | 684.3  | 1350.6 | 1349.6 | Q  | 1070.5 | 535.8  | 1053.5 | 1052.5 | 10 |
| 14 | 1514.7 | 757.9  | 1497.7 | 1496.7 | F  | 942.4  | 471.7  | 925.4  | 924.4  | 9  |
| 15 | 1601.7 | 801.4  | 1584.7 | 1583.7 | S  | 795.4  | 398.2  | 778.3  | 777.4  | 8  |
| 16 | 1688.8 | 844.9  | 1671.8 | 1670.8 | S  | 708.3  | 354.7  | 691.3  | 690.3  | 7  |
| 17 | 1745.8 | 873.4  | 1728.8 | 1727.8 | G  | 621.3  | 311.2  | 604.3  | 603.3  | 6  |
| 18 | 1832.8 | 916.9  | 1815.8 | 1814.8 | S  | 564.3  |        | 547.3  | 546.3  | 5  |
| 19 | 1960.9 | 981.0  | 1943.9 | 1942.9 | Q  | 477.2  |        | 460.2  | 459.2  | 4  |
| 20 | 2047.9 | 1024.5 | 2030.9 | 2029.9 | S  | 349.2  |        | 332.2  | 331.2  | 3  |
| 21 | 2134.9 | 1068.0 | 2117.9 | 2116.9 | S  | 262.1  |        | 245.1  | 244.1  | 2  |
| 22 | 2309.1 | 1155.0 | 2292.0 | 2291.1 | R  | 175.1  |        | 158.1  |        | 1  |

Gene symbol: Krt78

Protein name: similar to Keratin, type I cytoskeletal 10

Protein accession numbers: IPI00750213,IPI00755181,IPI00798492,IPI00828744

Peptide sequence: (K)QSLEASLAETEGR(Y)

Exclusive (unique to this protein): TRUE

SEQUEST XCorr score: 2.44 SEQUEST DCn score: 0.721

Fix modifications: None

Variable modifications: None

charge: 2

Observed m/z: 695.8404

Actual minus calculated peptide mass (AMU): -0.008423

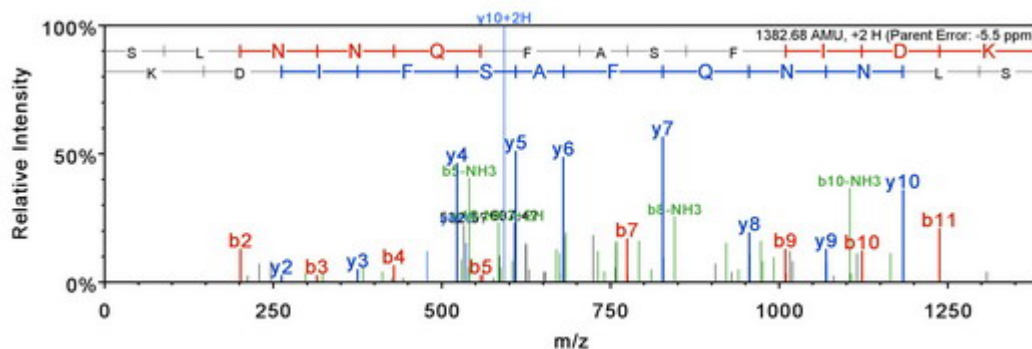

| B  | B Ions | B+2H  | B-NH3  | B-H2O  | AA | Y Ions | Y+2H  | Y-NH3  | Y-H2O  | Y  |
|----|--------|-------|--------|--------|----|--------|-------|--------|--------|----|
| 1  | 88.0   |       |        | 70.0   | S  | 1383.7 | 692.4 | 1366.7 | 1365.7 | 12 |
| 2  | 201.1  |       |        | 183.1  | L  | 1296.7 | 648.8 | 1279.6 | 1278.7 | 11 |
| 3  | 315.2  |       | 298.1  | 297.2  | N  | 1183.6 | 592.3 | 1166.5 | 1165.6 | 10 |
| 4  | 429.2  |       | 412.2  | 411.2  | N  | 1069.5 | 535.3 | 1052.5 | 1051.5 | 9  |
| 5  | 557.3  |       | 540.2  | 539.3  | Q  | 955.5  | 478.3 | 938.5  | 937.5  | 8  |
| 6  | 704.3  | 352.7 | 687.3  | 686.3  | F  | 827.4  | 414.2 | 810.4  | 809.4  | 7  |
| 7  | 775.4  | 388.2 | 758.4  | 757.4  | A  | 680.4  | 340.7 | 663.3  | 662.4  | 6  |
| 8  | 862.4  | 431.7 | 845.4  | 844.4  | S  | 609.3  |       | 592.3  | 591.3  | 5  |
| 9  | 1009.5 | 505.2 | 992.5  | 991.5  | F  | 522.3  |       | 505.3  | 504.3  | 4  |
| 10 | 1122.6 | 561.8 | 1105.5 | 1104.5 | I  | 375.2  |       | 358.2  | 357.2  | 3  |
| 11 | 1237.6 | 619.3 | 1220.6 | 1219.6 | D  | 262.1  |       | 245.1  | 244.1  | 2  |
| 12 | 1383.7 | 692.4 | 1366.7 | 1365.7 | K  | 147.1  |       | 130.1  |        | 1  |

Gene symbol: Krt79

Protein name: Keratin 79

Protein accession numbers: IPI00124499

Peptide sequence: (R)NLDLDSIIAEVK(A)

Exclusive (unique to this protein): TRUE

SEQUEST XCorr score: 2.01 SEQUEST DCn score: 0.561

Fix modifications: None

Variable modifications: None

charge: 2

Observed m/z: 665.3663

Actual minus calculated peptide mass (AMU): -0.0019551

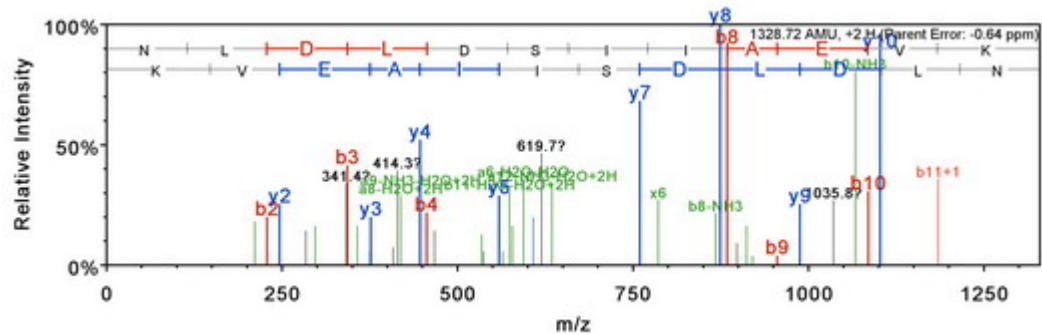

| B  | B Ions | B+2H  | B-NH3  | B-H2O  | AA | Y Ions | Y+2H  | Y-NH3  | Y-H2O  | Y  |
|----|--------|-------|--------|--------|----|--------|-------|--------|--------|----|
| 1  | 115.1  |       | 98.0   |        | N  | 1329.7 | 665.4 | 1312.7 | 1311.7 | 12 |
| 2  | 228.1  |       | 211.1  |        | L  | 1215.7 | 608.4 | 1198.7 | 1197.7 | 11 |
| 3  | 343.2  |       | 326.1  | 325.2  | D  | 1102.6 | 551.8 | 1085.6 | 1084.6 | 10 |
| 4  | 456.3  |       | 439.2  | 438.2  | L  | 987.6  | 494.3 | 970.6  | 969.6  | 9  |
| 5  | 571.3  |       | 554.3  | 553.3  | D  | 874.5  | 437.8 | 857.5  | 856.5  | 8  |
| 6  | 658.3  | 329.7 | 641.3  | 640.3  | S  | 759.5  | 380.2 | 742.4  | 741.5  | 7  |
| 7  | 771.4  | 386.2 | 754.4  | 753.4  | I  | 672.4  | 336.7 | 655.4  | 654.4  | 6  |
| 8  | 884.5  | 442.7 | 867.5  | 866.5  | I  | 559.4  |       | 542.3  | 541.3  | 5  |
| 9  | 955.5  | 478.3 | 938.5  | 937.5  | A  | 446.3  |       | 429.2  | 428.3  | 4  |
| 10 | 1084.5 | 542.8 | 1067.5 | 1066.5 | E  | 375.2  |       | 358.2  | 357.2  | 3  |
| 11 | 1183.6 | 592.3 | 1166.6 | 1165.6 | V  | 246.2  |       | 229.2  |        | 2  |
| 12 | 1329.7 | 665.4 | 1312.7 | 1311.7 | K  | 147.1  |       | 130.1  |        | 1  |

Gene symbol: Lamb1-1

Protein name: laminin B1 subunit 1

Protein accession numbers: IPI00338785

Peptide sequence: (R)YSDIEPSTEGETEVEVIFR(A)

Exclusive (unique to this protein): TRUE

SEQUEST XCorr score: 2.1 SEQUEST DCn score: 0.383

Fix modifications: None

Variable modifications: None

charge: 2

Observed m/z: 871.4152

Actual minus calculated peptide mass (AMU): -0.005859

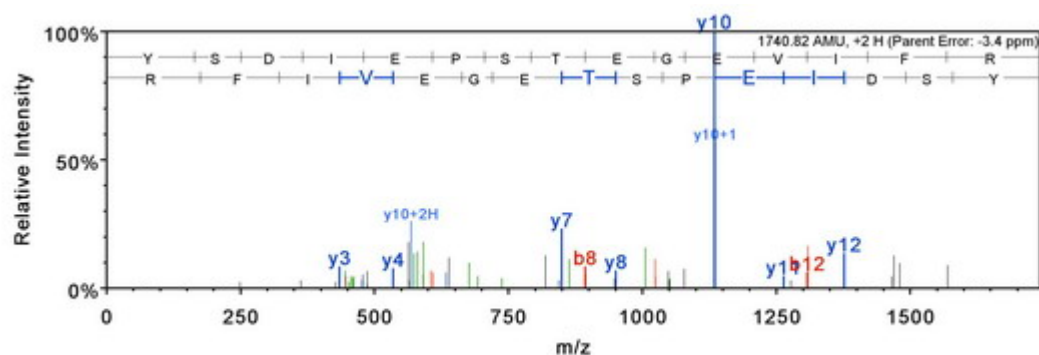

| B  | B ions | B+2H  | B-NH3  | B-H2O  | AA | Y ions | Y+2H  | Y-NH3  | Y-H2O  | Y  |
|----|--------|-------|--------|--------|----|--------|-------|--------|--------|----|
| 1  | 164.1  |       |        |        | Y  | 1741.8 | 871.4 | 1724.8 | 1723.8 | 15 |
| 2  | 251.1  |       |        | 233.1  | S  | 1578.8 | 789.9 | 1561.7 | 1560.8 | 14 |
| 3  | 366.1  |       |        | 348.1  | D  | 1491.7 | 746.4 | 1474.7 | 1473.7 | 13 |
| 4  | 479.2  |       |        | 461.2  | I  | 1376.7 | 688.9 | 1359.7 | 1358.7 | 12 |
| 5  | 608.3  |       |        | 590.3  | E  | 1263.6 | 632.3 | 1246.6 | 1245.6 | 11 |
| 6  | 705.3  | 353.2 |        | 687.3  | P  | 1134.6 | 567.8 | 1117.5 | 1116.6 | 10 |
| 7  | 792.3  | 396.7 |        | 774.3  | S  | 1037.5 | 519.3 | 1020.5 | 1019.5 | 9  |
| 8  | 893.4  | 447.2 |        | 875.4  | T  | 950.5  | 475.8 | 933.5  | 932.5  | 8  |
| 9  | 1022.4 | 511.7 |        | 1004.4 | E  | 849.5  | 425.2 | 832.4  | 831.4  | 7  |
| 10 | 1079.5 | 540.2 |        | 1061.4 | G  | 720.4  | 360.7 | 703.4  | 702.4  | 6  |
| 11 | 1208.5 | 604.8 |        | 1190.5 | E  | 663.4  |       | 646.4  | 645.4  | 5  |
| 12 | 1307.6 | 654.3 |        | 1289.5 | V  | 534.3  |       | 517.3  |        | 4  |
| 13 | 1420.7 | 710.8 |        | 1402.6 | I  | 435.3  |       | 418.3  |        | 3  |
| 14 | 1567.7 | 784.4 |        | 1549.7 | F  | 322.2  |       | 305.2  |        | 2  |
| 15 | 1741.8 | 871.4 | 1724.8 | 1723.8 | R  | 175.1  |       | 158.1  |        | 1  |

Gene symbol: Lcp1

Protein name: Plastin-2

Protein accession numbers: IPI00118892

Peptide sequence: (K)FSLVGIAGQDLNEGNR(T)

Exclusive (unique to this protein): TRUE

SEQUEST XCorr score: 2.21 SEQUEST DCn score: 0.603

Fix modifications: None

Variable modifications: None

charge: 2 Observed m/z: 845.4285

Actual minus calculated peptide mass (AMU): -0.006958

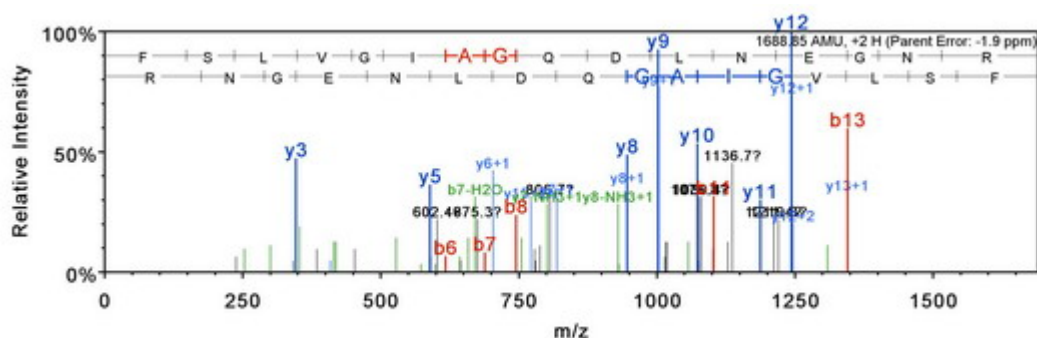

| B  | B ions | B+2H  | B-NH3  | B-H2O  | A,A | Y ions | Y+2H  | Y-NH3  | Y-H2O  | Y  |
|----|--------|-------|--------|--------|-----|--------|-------|--------|--------|----|
| 1  | 148.1  |       |        |        | F   | 1689.9 | 845.4 | 1672.8 | 1671.9 | 16 |
| 2  | 235.1  |       |        | 217.1  | S   | 1542.8 | 771.9 | 1525.8 | 1524.8 | 15 |
| 3  | 348.2  |       |        | 330.2  | L   | 1455.8 | 728.4 | 1438.7 | 1437.8 | 14 |
| 4  | 447.3  |       |        | 429.3  | V   | 1342.7 | 671.8 | 1325.7 | 1324.7 | 13 |
| 5  | 504.3  |       |        | 486.3  | G   | 1243.6 | 622.3 | 1226.6 | 1225.6 | 12 |
| 6  | 617.4  | 309.2 |        | 599.4  | I   | 1186.6 | 593.8 | 1169.6 | 1168.6 | 11 |
| 7  | 688.4  | 344.7 |        | 670.4  | A   | 1073.5 | 537.3 | 1056.5 | 1055.5 | 10 |
| 8  | 745.4  | 373.2 |        | 727.4  | G   | 1002.5 | 501.7 | 985.4  | 984.5  | 9  |
| 9  | 873.5  | 437.3 | 856.5  | 855.5  | Q   | 945.4  | 473.2 | 928.4  | 927.4  | 8  |
| 10 | 988.5  | 494.8 | 971.5  | 970.5  | D   | 817.4  | 409.2 | 800.4  | 799.4  | 7  |
| 11 | 1101.6 | 551.3 | 1084.6 | 1083.6 | L   | 702.4  | 351.7 | 685.3  | 684.3  | 6  |
| 12 | 1215.6 | 608.3 | 1198.6 | 1197.6 | N   | 589.3  |       | 572.2  | 571.3  | 5  |
| 13 | 1344.7 | 672.8 | 1327.7 | 1326.7 | E   | 475.2  |       | 458.2  | 457.2  | 4  |
| 14 | 1401.7 | 701.4 | 1384.7 | 1383.7 | G   | 346.2  |       | 329.2  |        | 3  |
| 15 | 1515.7 | 758.4 | 1498.7 | 1497.7 | N   | 289.2  |       | 272.1  |        | 2  |
| 16 | 1689.9 | 845.4 | 1672.8 | 1671.9 | R   | 175.1  |       | 158.1  |        | 1  |

Gene symbol: Lman2

Protein name: 9 days embryo whole body cDNA, RIKEN full-length enriched library, clone:D030015M14 product:VESICULAR INTEGRAL-MEMBRANE PROTEIN VIP36 (VIP36) homolog

Protein accession numbers: IPI00308609,IPI00321634

Peptide sequence: (R)WSELAGCTADFR(N)

Exclusive (unique to this protein): TRUE

SEQUEST XCorr score: 3.08 SEQUEST DCn score: 0.718

Fix modifications: C7: Carbamidomethyl (+57.02)Variable modifications: None

charge: 2 Observed m/z: 706.8142

Actual minus calculated peptide mass (AMU): -0.0063456



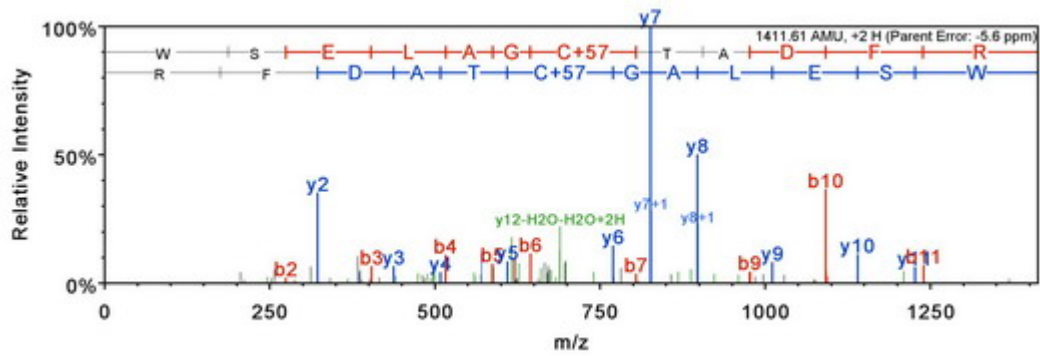

| B  | B Ions | B+2H  | B-NH3  | B-H2O  | AA   | Y Ions | Y+2H  | Y-NH3  | Y-H2O  | Y  |
|----|--------|-------|--------|--------|------|--------|-------|--------|--------|----|
| 1  | 187.1  |       |        |        | W    | 1412.6 | 706.8 | 1395.6 | 1394.6 | 12 |
| 2  | 274.1  |       |        | 256.1  | S    | 1226.5 | 613.8 | 1209.5 | 1208.5 | 11 |
| 3  | 403.2  |       |        | 385.2  | E    | 1139.5 | 570.3 | 1122.5 | 1121.5 | 10 |
| 4  | 516.3  |       |        | 498.2  | L    | 1010.5 | 505.7 | 993.5  | 992.5  | 9  |
| 5  | 587.3  |       |        | 569.3  | A    | 897.4  | 449.2 | 880.4  | 879.4  | 8  |
| 6  | 644.3  | 322.7 |        | 626.3  | G    | 826.4  | 413.7 | 809.3  | 808.3  | 7  |
| 7  | 804.3  | 402.7 |        | 786.3  | C+57 | 769.3  | 385.2 | 752.3  | 751.3  | 6  |
| 8  | 905.4  | 453.2 |        | 887.4  | T    | 609.3  |       | 592.3  | 591.3  | 5  |
| 9  | 976.4  | 488.7 |        | 958.4  | A    | 508.3  |       | 491.2  | 490.2  | 4  |
| 10 | 1091.5 | 546.2 |        | 1073.4 | D    | 437.2  |       | 420.2  | 419.2  | 3  |
| 11 | 1238.5 | 619.8 |        | 1220.5 | F    | 322.2  |       | 305.2  |        | 2  |
| 12 | 1412.6 | 706.8 | 1395.6 | 1394.6 | R    | 175.1  |       | 158.1  |        | 1  |

Gene symbol: LOC382492

Protein name: similar to 40S ribosomal protein S17

Protein accession numbers: IPI00381546,IPI00465880,IPI00755495,IPI00756135,IPI00848900

Peptide sequence: (R)DNYVPEVSALDQEIIIVDPDTK(E)

Exclusive (unique to this protein): TRUE

SEQUEST XCorr score: 2.23 SEQUEST DCn score: 0.4

Fix modifications: None

Variable modifications: None

charge: 2

Observed m/z: 1245.0983

Actual minus calculated peptide mass (AMU): -0.004883

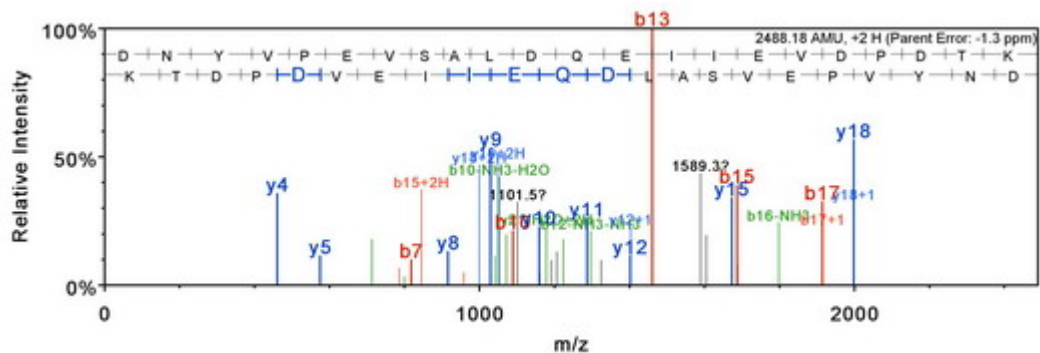

| B  | B Ions | B+2H   | B-NH3  | B-H2O  | AA | Y Ions | Y+2H   | Y-NH3  | Y-H2O  | Y  |
|----|--------|--------|--------|--------|----|--------|--------|--------|--------|----|
| 1  | 116.0  |        |        | 98.0   | D  | 2489.2 | 1245.1 | 2472.2 | 2471.2 | 22 |
| 2  | 230.1  |        | 213.1  | 212.1  | N  | 2374.2 | 1187.6 | 2357.1 | 2356.2 | 21 |
| 3  | 393.1  |        | 376.1  | 375.1  | Y  | 2260.1 | 1130.6 | 2243.1 | 2242.1 | 20 |
| 4  | 492.2  |        | 475.2  | 474.2  | V  | 2097.1 | 1049.0 | 2080.0 | 2079.1 | 19 |
| 5  | 589.3  |        | 572.2  | 571.3  | P  | 1998.0 | 999.5  | 1981.0 | 1980.0 | 18 |
| 6  | 718.3  | 359.7  | 701.3  | 700.3  | E  | 1900.9 | 951.0  | 1883.9 | 1882.9 | 17 |
| 7  | 817.4  | 409.2  | 800.4  | 799.4  | V  | 1771.9 | 886.5  | 1754.9 | 1753.9 | 16 |
| 8  | 904.4  | 452.7  | 887.4  | 886.4  | S  | 1672.8 | 836.9  | 1655.8 | 1654.8 | 15 |
| 9  | 975.4  | 488.2  | 958.4  | 957.4  | A  | 1585.8 | 793.4  | 1568.8 | 1567.8 | 14 |
| 10 | 1088.5 | 544.8  | 1071.5 | 1070.5 | L  | 1514.8 | 757.9  | 1497.7 | 1496.8 | 13 |
| 11 | 1203.5 | 602.3  | 1186.5 | 1185.5 | D  | 1401.7 | 701.3  | 1384.7 | 1383.7 | 12 |
| 12 | 1331.6 | 666.3  | 1314.6 | 1313.6 | Q  | 1286.7 | 643.8  | 1269.6 | 1268.6 | 11 |
| 13 | 1460.7 | 730.8  | 1443.6 | 1442.6 | E  | 1158.6 | 579.8  | 1141.6 | 1140.6 | 10 |
| 14 | 1573.7 | 787.4  | 1556.7 | 1555.7 | I  | 1029.5 | 515.3  | 1012.5 | 1011.5 | 9  |
| 15 | 1686.8 | 843.9  | 1669.8 | 1668.8 | I  | 916.5  | 458.7  | 899.4  | 898.5  | 8  |
| 16 | 1815.9 | 908.4  | 1798.8 | 1797.9 | E  | 803.4  | 402.2  | 786.4  | 785.4  | 7  |
| 17 | 1914.9 | 958.0  | 1897.9 | 1896.9 | V  | 674.3  | 337.7  | 657.3  | 656.3  | 6  |
| 18 | 2030.0 | 1015.5 | 2012.9 | 2012.0 | D  | 575.3  |        | 558.2  | 557.3  | 5  |
| 19 | 2127.0 | 1064.0 | 2110.0 | 2109.0 | P  | 460.2  |        | 443.2  | 442.2  | 4  |
| 20 | 2242.0 | 1121.5 | 2225.0 | 2224.0 | D  | 363.2  |        | 346.2  | 345.2  | 3  |
| 21 | 2343.1 | 1172.0 | 2326.1 | 2325.1 | T  | 248.2  |        | 231.1  | 230.2  | 2  |
| 22 | 2489.2 | 1245.1 | 2472.2 | 2471.2 | K  | 147.1  |        | 130.1  |        | 1  |

Gene symbol: LOC627816

Protein name: similar to protein phosphatase 1, catalytic subunit, gamma isoform isoform 9

Protein accession numbers: IPI00752131

Peptide sequence: (K)TFTDCFNCLPIAAIVDEK(I)

Exclusive (unique to this protein): TRUE

SEQUEST XCorr score: 2.21 SEQUEST DCn score: 0.555

Fix modifications: C5: Carbamidomethyl (+57.02), C8: Carbamidomethyl (+57.02) Variable modifications: None

charge: 2

Observed m/z: 1057.4959

Actual minus calculated peptide mass (AMU): -0.010253

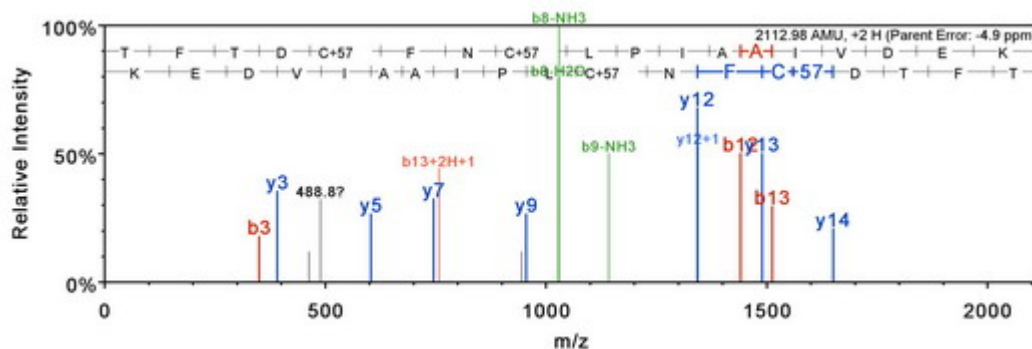

| B  | B Ions | B+2H   | B-NH3  | B-H2O  | AA   | Y Ions | Y+2H   | Y-NH3  | Y-H2O  | Y  |
|----|--------|--------|--------|--------|------|--------|--------|--------|--------|----|
| 1  | 102.1  |        |        | 84.0   | T    | 2114.0 | 1057.5 | 2097.0 | 2096.0 | 18 |
| 2  | 249.1  |        |        | 231.1  | F    | 2013.0 | 1007.0 | 1995.9 | 1994.9 | 17 |
| 3  | 350.2  |        |        | 332.2  | T    | 1865.9 | 933.4  | 1848.9 | 1847.9 | 16 |
| 4  | 465.2  |        |        | 447.2  | D    | 1764.8 | 882.9  | 1747.8 | 1746.8 | 15 |
| 5  | 625.2  |        |        | 607.2  | C+57 | 1649.8 | 825.4  | 1632.8 | 1631.8 | 14 |
| 6  | 772.3  | 386.7  |        | 754.3  | F    | 1489.8 | 745.4  | 1472.8 | 1471.8 | 13 |
| 7  | 886.3  | 443.7  | 869.3  | 868.3  | N    | 1342.7 | 671.9  | 1325.7 | 1324.7 | 12 |
| 8  | 1046.4 | 523.7  | 1029.3 | 1028.4 | C+57 | 1228.7 | 614.8  | 1211.6 | 1210.7 | 11 |
| 9  | 1159.5 | 580.2  | 1142.4 | 1141.4 | L    | 1068.6 | 534.8  | 1051.6 | 1050.6 | 10 |
| 10 | 1256.5 | 628.8  | 1239.5 | 1238.5 | P    | 955.6  | 478.3  | 938.5  | 937.5  | 9  |
| 11 | 1369.6 | 685.3  | 1352.6 | 1351.6 | I    | 858.5  | 429.8  | 841.5  | 840.5  | 8  |
| 12 | 1440.6 | 720.8  | 1423.6 | 1422.6 | A    | 745.4  | 373.2  | 728.4  | 727.4  | 7  |
| 13 | 1511.7 | 756.3  | 1494.6 | 1493.7 | A    | 674.4  | 337.7  | 657.4  | 656.4  | 6  |
| 14 | 1624.8 | 812.9  | 1607.7 | 1606.7 | I    | 603.3  |        | 586.3  | 585.3  | 5  |
| 15 | 1723.8 | 862.4  | 1706.8 | 1705.8 | V    | 490.3  |        | 473.2  | 472.2  | 4  |
| 16 | 1838.9 | 919.9  | 1821.8 | 1820.8 | D    | 391.2  |        | 374.2  | 373.2  | 3  |
| 17 | 1967.9 | 984.5  | 1950.9 | 1949.9 | E    | 276.2  |        | 259.1  | 258.1  | 2  |
| 18 | 2114.0 | 1057.5 | 2097.0 | 2096.0 | K    | 147.1  |        | 130.1  |        | 1  |

Gene symbol: LOC630393

Protein name: similar to PRAME family member DJ1198H6.2 isoform 6

Protein accession numbers: IPI00623662,IPI00667531,IPI00848712

Peptide sequence: (R)LDESTTYLLQWAQQR(K)

Exclusive (unique to this protein): TRUE

SEQUEST XCorr score: 2.23 SEQUEST DCn score: 0.478

Fix modifications: None

Variable modifications: None

charge: 2

Observed m/z: 926.4629

Actual minus calculated peptide mass (AMU): -0.0063456

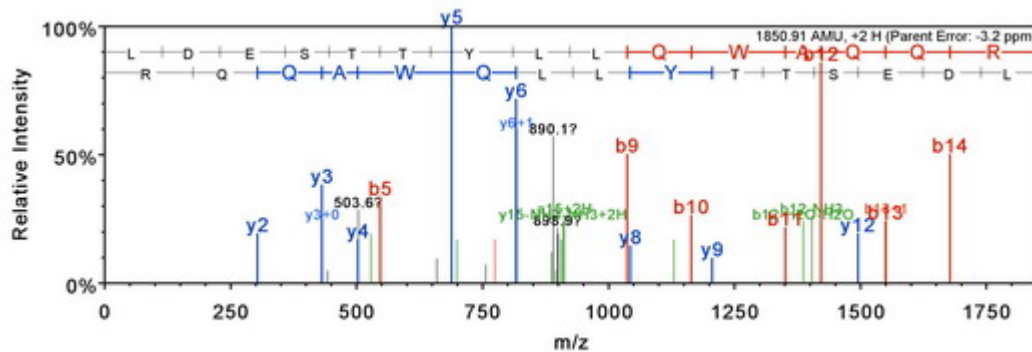

| B  | B Ions | B+2H  | B-NH3  | B-H2O  | AA | Y Ions | Y+2H  | Y-NH3  | Y-H2O  | Y  |
|----|--------|-------|--------|--------|----|--------|-------|--------|--------|----|
| 1  | 114.1  |       |        |        | L  | 1851.9 | 926.5 | 1834.9 | 1833.9 | 15 |
| 2  | 229.1  |       |        | 211.1  | D  | 1738.8 | 869.9 | 1721.8 | 1720.8 | 14 |
| 3  | 358.2  |       |        | 340.2  | E  | 1623.8 | 812.4 | 1606.8 | 1605.8 | 13 |
| 4  | 445.2  |       |        | 427.2  | S  | 1494.8 | 747.9 | 1477.7 | 1476.8 | 12 |
| 5  | 546.2  |       |        | 528.2  | T  | 1407.7 | 704.4 | 1390.7 | 1389.7 | 11 |
| 6  | 647.3  | 324.2 |        | 629.3  | T  | 1306.7 | 653.9 | 1289.7 | 1288.7 | 10 |
| 7  | 810.4  | 405.7 |        | 792.3  | Y  | 1205.6 | 603.3 | 1188.6 |        | 9  |
| 8  | 923.4  | 462.2 |        | 905.4  | L  | 1042.6 | 521.8 | 1025.5 |        | 8  |
| 9  | 1036.5 | 518.8 |        | 1018.5 | L  | 929.5  | 465.3 | 912.5  |        | 7  |
| 10 | 1164.6 | 582.8 | 1147.5 | 1146.6 | Q  | 816.4  | 408.7 | 799.4  |        | 6  |
| 11 | 1350.7 | 675.8 | 1333.6 | 1332.7 | W  | 688.4  |       | 671.3  |        | 5  |
| 12 | 1421.7 | 711.4 | 1404.7 | 1403.7 | A  | 502.3  |       | 485.3  |        | 4  |
| 13 | 1549.8 | 775.4 | 1532.7 | 1531.7 | Q  | 431.2  |       | 414.2  |        | 3  |
| 14 | 1677.8 | 839.4 | 1660.8 | 1659.8 | Q  | 303.2  |       | 286.2  |        | 2  |
| 15 | 1851.9 | 926.5 | 1834.9 | 1833.9 | R  | 175.1  |       | 158.1  |        | 1  |

Gene symbol: LOC668706;LOC672854

Protein name: similar to 60S ribosomal protein L12

Protein accession numbers: IPI00338838

Peptide sequence: (R)QAQIEVVPSASALIK(A)

Exclusive (unique to this protein): TRUE

SEQUEST XCorr score: 2.07 SEQUEST DCn score: 0.634

Fix modifications: None

Variable modifications: None

charge: 2

Observed m/z: 833.9921

Actual minus calculated peptide mass (AMU): 0.001831

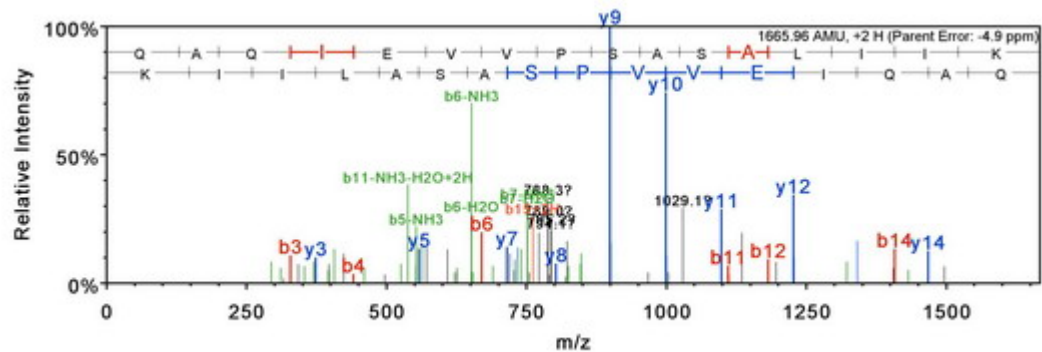

| B  | B Ions | B+2H  | B-NH3  | B-H2O  | AA | Y Ions | Y+2H  | Y-NH3  | Y-H2O  | Y  |
|----|--------|-------|--------|--------|----|--------|-------|--------|--------|----|
| 1  | 129.1  |       | 112.0  |        | Q  | 1667.0 | 834.0 | 1650.0 | 1649.0 | 16 |
| 2  | 200.1  |       | 183.1  |        | A  | 1538.9 | 770.0 | 1521.9 | 1520.9 | 15 |
| 3  | 328.2  |       | 311.1  |        | Q  | 1467.9 | 734.4 | 1450.9 | 1449.9 | 14 |
| 4  | 441.3  |       | 424.2  |        | I  | 1339.8 | 670.4 | 1322.8 | 1321.8 | 13 |
| 5  | 570.3  |       | 553.3  | 552.3  | E  | 1226.7 | 613.9 | 1209.7 | 1208.7 | 12 |
| 6  | 669.4  | 335.2 | 652.3  | 651.4  | V  | 1097.7 | 549.4 | 1080.7 | 1079.7 | 11 |
| 7  | 768.4  | 384.7 | 751.4  | 750.4  | V  | 998.6  | 499.8 | 981.6  | 980.6  | 10 |
| 8  | 865.5  | 433.2 | 848.5  | 847.5  | P  | 899.6  | 450.3 | 882.5  | 881.6  | 9  |
| 9  | 952.5  | 476.8 | 935.5  | 934.5  | S  | 802.5  | 401.8 | 785.5  | 784.5  | 8  |
| 10 | 1023.6 | 512.3 | 1006.5 | 1005.5 | A  | 715.5  | 358.2 | 698.5  | 697.5  | 7  |
| 11 | 1110.6 | 555.8 | 1093.5 | 1092.6 | S  | 644.4  | 322.7 | 627.4  | 626.4  | 6  |
| 12 | 1181.6 | 591.3 | 1164.6 | 1163.6 | A  | 557.4  |       | 540.4  |        | 5  |
| 13 | 1294.7 | 647.9 | 1277.7 | 1276.7 | L  | 486.4  |       | 469.3  |        | 4  |
| 14 | 1407.8 | 704.4 | 1390.8 | 1389.8 | I  | 373.3  |       | 356.3  |        | 3  |
| 15 | 1520.9 | 760.9 | 1503.8 | 1502.9 | I  | 260.2  |       | 243.2  |        | 2  |
| 16 | 1667.0 | 834.0 | 1650.0 | 1649.0 | K  | 147.1  |       | 130.1  |        | 1  |

Gene symbol: LOC671726;EG666974

Protein name: similar to Proteasome subunit alpha type 5 (Proteasome zeta chain) (Macropain zeta chain) (Multicatalytic endopeptidase complex zeta chain) isoform 1

Protein accession numbers: IPI00122562,IPI00131407,IPI00757768

Peptide sequence: (R)AIGSASEGAQSSLQEVYHK(S)

Exclusive (unique to this protein): TRUE

SEQUEST XCorr score: 2.02 SEQUEST DCn score: 0.615

Fix modifications: None

Variable modifications: None

charge: 2

Observed m/z: 981.4853

Actual minus calculated peptide mass (AMU): 0.006226

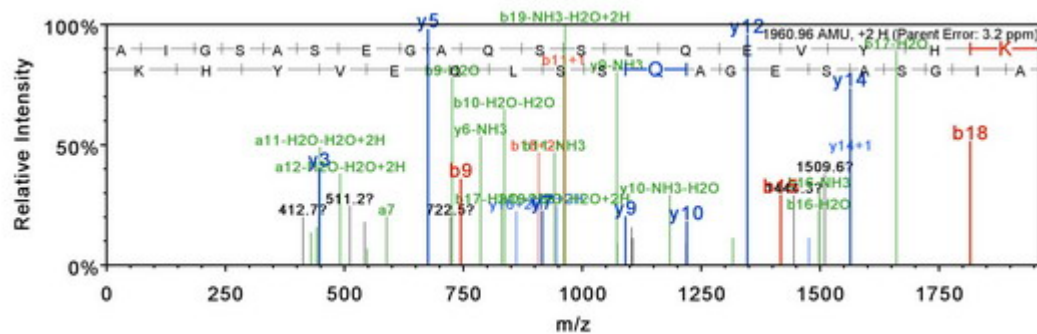

| B  | B Ions | B+2H  | B-NH3  | B-H2O  | A,A | Y Ions | Y+2H  | Y-NH3  | Y-H2O  | Y  |
|----|--------|-------|--------|--------|-----|--------|-------|--------|--------|----|
| 1  | 72.0   |       |        |        | A   | 1962.0 | 981.5 | 1944.9 | 1944.0 | 19 |
| 2  | 185.1  |       |        |        | I   | 1890.9 | 946.0 | 1873.9 | 1872.9 | 18 |
| 3  | 242.2  |       |        |        | G   | 1777.8 | 889.4 | 1760.8 | 1759.8 | 17 |
| 4  | 329.2  |       |        | 311.2  | S   | 1720.8 | 860.9 | 1703.8 | 1702.8 | 16 |
| 5  | 400.2  |       |        | 382.2  | A   | 1633.8 | 817.4 | 1616.8 | 1615.8 | 15 |
| 6  | 487.3  | 244.1 |        | 469.2  | S   | 1562.8 | 781.9 | 1545.7 | 1544.7 | 14 |
| 7  | 616.3  | 308.7 |        | 598.3  | E   | 1475.7 | 738.4 | 1458.7 | 1457.7 | 13 |
| 8  | 673.3  | 337.2 |        | 655.3  | G   | 1346.7 | 673.8 | 1329.6 | 1328.7 | 12 |
| 9  | 744.4  | 372.7 |        | 726.3  | A   | 1289.7 | 645.3 | 1272.6 | 1271.6 | 11 |
| 10 | 872.4  | 436.7 | 855.4  | 854.4  | Q   | 1218.6 | 609.8 | 1201.6 | 1200.6 | 10 |
| 11 | 959.4  | 480.2 | 942.4  | 941.4  | S   | 1090.5 | 545.8 | 1073.5 | 1072.5 | 9  |
| 12 | 1046.5 | 523.7 | 1029.5 | 1028.5 | S   | 1003.5 | 502.3 | 986.5  | 985.5  | 8  |
| 13 | 1159.6 | 580.3 | 1142.5 | 1141.5 | L   | 916.5  | 458.8 | 899.5  | 898.5  | 7  |
| 14 | 1287.6 | 644.3 | 1270.6 | 1269.6 | Q   | 803.4  | 402.2 | 786.4  | 785.4  | 6  |
| 15 | 1416.7 | 708.8 | 1399.6 | 1398.7 | E   | 675.4  | 338.2 | 658.3  | 657.3  | 5  |
| 16 | 1515.7 | 758.4 | 1498.7 | 1497.7 | V   | 546.3  | 273.7 | 529.3  |        | 4  |
| 17 | 1678.8 | 839.9 | 1661.8 | 1660.8 | Y   | 447.2  | 224.1 | 430.2  |        | 3  |
| 18 | 1815.9 | 908.4 | 1798.8 | 1797.8 | H   | 284.2  | 142.6 | 267.1  |        | 2  |
| 19 | 1962.0 | 981.5 | 1944.9 | 1944.0 | K   | 147.1  |       | 130.1  |        | 1  |

Gene symbol: LOC671953

Protein name: similar to Myosin light polypeptide 6

Protein accession numbers:

IPI00264053,IPI00354819,IPI00409817,IPI00474757,IPI00753099,IPI00848866

Peptide sequence: (K)DQGTYEDYVEGLR(V)

Exclusive (unique to this protein): TRUE

SEQUEST XCorr score: 2.38 SEQUEST DCn score: 0.545

Fix modifications: None

Variable modifications: None

charge: 2 Observed m/z: 772.8438

Actual minus calculated peptide mass (AMU): -0.007324

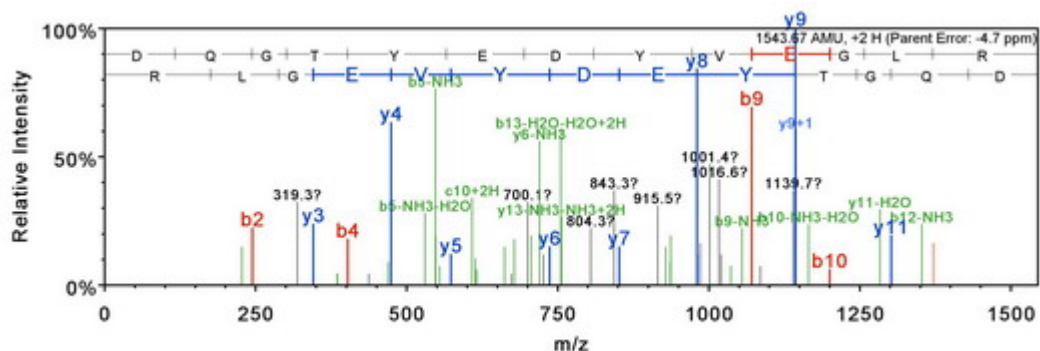

| B  | B Ions | B+2H  | B-NH3  | B-H2O  | AA | Y Ions | Y+2H  | Y-NH3  | Y-H2O  | Y  |
|----|--------|-------|--------|--------|----|--------|-------|--------|--------|----|
| 1  | 116.0  |       |        | 98.0   | D  | 1544.7 | 772.9 | 1527.7 | 1526.7 | 13 |
| 2  | 244.1  |       | 227.1  | 226.1  | Q  | 1429.7 | 715.3 | 1412.6 | 1411.7 | 12 |
| 3  | 301.1  |       | 284.1  | 283.1  | G  | 1301.6 | 651.3 | 1284.6 | 1283.6 | 11 |
| 4  | 402.2  |       | 385.1  | 384.2  | T  | 1244.6 | 622.8 | 1227.5 | 1226.6 | 10 |
| 5  | 565.2  |       | 548.2  | 547.2  | Y  | 1143.5 | 572.3 | 1126.5 | 1125.5 | 9  |
| 6  | 694.3  | 347.6 | 677.2  | 676.3  | E  | 980.5  | 490.7 | 963.4  | 962.5  | 8  |
| 7  | 809.3  | 405.2 | 792.3  | 791.3  | D  | 851.4  | 426.2 | 834.4  | 833.4  | 7  |
| 8  | 972.4  | 486.7 | 955.3  | 954.4  | Y  | 736.4  | 368.7 | 719.4  | 718.4  | 6  |
| 9  | 1071.4 | 536.2 | 1054.4 | 1053.4 | V  | 573.3  |       | 556.3  | 555.3  | 5  |
| 10 | 1200.5 | 600.7 | 1183.4 | 1182.5 | E  | 474.3  |       | 457.2  | 456.3  | 4  |
| 11 | 1257.5 | 629.3 | 1240.5 | 1239.5 | G  | 345.2  |       | 328.2  |        | 3  |
| 12 | 1370.6 | 685.8 | 1353.5 | 1352.6 | L  | 288.2  |       | 271.2  |        | 2  |
| 13 | 1544.7 | 772.9 | 1527.7 | 1526.7 | R  | 175.1  |       | 158.1  |        | 1  |

Gene symbol: LOC673608

Protein name: similar to 60S ribosomal protein L27a

Protein accession numbers: IPI00754044

Peptide sequence: (K)TGVAPIIDVVR(S)

Exclusive (unique to this protein): TRUE

SEQUEST XCorr score: 2.14 SEQUEST DCn score: 0.465

Fix modifications: None

Variable modifications: None

charge: 2

Observed m/z: 570.3395

Actual minus calculated peptide mass (AMU): -0.007935

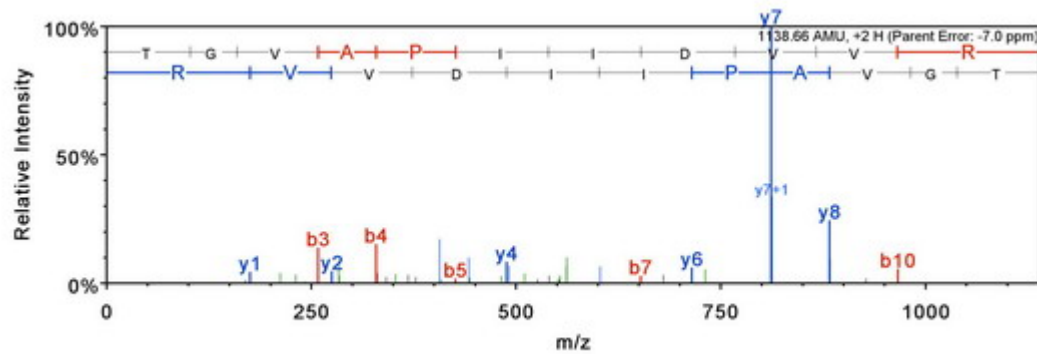

| B  | B Ions | B+2H  | B-NH3  | B-H2O  | AA | Y Ions | Y+2H  | Y-NH3  | Y-H2O  | Y  |
|----|--------|-------|--------|--------|----|--------|-------|--------|--------|----|
| 1  | 102.1  |       |        | 84.0   | T  | 1139.7 | 570.3 | 1122.7 | 1121.7 | 11 |
| 2  | 159.1  |       |        | 141.1  | G  | 1038.6 | 519.8 | 1021.6 | 1020.6 | 10 |
| 3  | 258.1  |       |        | 240.1  | V  | 981.6  | 491.3 | 964.6  | 963.6  | 9  |
| 4  | 329.2  |       |        | 311.2  | A  | 882.5  | 441.8 | 865.5  | 864.5  | 8  |
| 5  | 426.2  |       |        | 408.2  | P  | 811.5  | 406.3 | 794.5  | 793.5  | 7  |
| 6  | 539.3  | 270.2 |        | 521.3  | I  | 714.5  | 357.7 | 697.4  | 696.4  | 6  |
| 7  | 652.4  | 326.7 |        | 634.4  | I  | 601.4  |       | 584.3  | 583.4  | 5  |
| 8  | 767.4  | 384.2 |        | 749.4  | D  | 488.3  |       | 471.3  | 470.3  | 4  |
| 9  | 866.5  | 433.8 |        | 848.5  | V  | 373.3  |       | 356.2  |        | 3  |
| 10 | 965.6  | 483.3 |        | 947.6  | V  | 274.2  |       | 257.2  |        | 2  |
| 11 | 1139.7 | 570.3 | 1122.7 | 1121.7 | R  | 175.1  |       | 158.1  |        | 1  |

Gene symbol: LOC675088;EG621100;Rpl27;LOC669376

Protein name: 60S ribosomal protein L27

Protein accession numbers: IPI00122421,IPI00626531,IPI00674087

Peptide sequence: (K)NIDDGTS DRPYSHALVAGIDR(Y)

Exclusive (unique to this protein): TRUE

SEQUEST XCorr score: 3.32 SEQUEST DCn score: 0.614

Fix modifications: None

Variable modifications: None

charge: 3

Observed m/z: 758.039

Actual minus calculated peptide mass (AMU): 0.005371

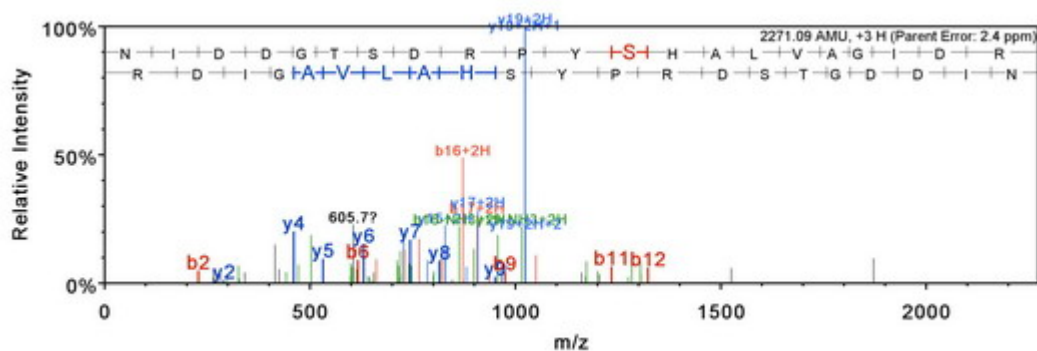

| B  | B ions | B+2H   | B-NH3  | B-H2O  | AA | Y ions | Y+2H   | Y-NH3  | Y-H2O  | Y  |
|----|--------|--------|--------|--------|----|--------|--------|--------|--------|----|
| 1  | 115.1  |        | 98.0   |        | N  | 2272.1 | 1136.5 | 2255.1 | 2254.1 | 21 |
| 2  | 228.1  |        | 211.1  |        | I  | 2158.1 | 1079.5 | 2141.0 | 2140.0 | 20 |
| 3  | 343.2  |        | 326.1  | 325.2  | D  | 2045.0 | 1023.0 | 2027.9 | 2027.0 | 19 |
| 4  | 458.2  |        | 441.2  | 440.2  | D  | 1929.9 | 965.5  | 1912.9 | 1911.9 | 18 |
| 5  | 515.2  |        | 498.2  | 497.2  | G  | 1814.9 | 908.0  | 1797.9 | 1796.9 | 17 |
| 6  | 616.3  | 308.6  | 599.2  | 598.3  | T  | 1757.9 | 879.5  | 1740.9 | 1739.9 | 16 |
| 7  | 703.3  | 352.2  | 686.3  | 685.3  | S  | 1656.9 | 828.9  | 1639.8 | 1638.8 | 15 |
| 8  | 818.3  | 409.7  | 801.3  | 800.3  | D  | 1569.8 | 785.4  | 1552.8 | 1551.8 | 14 |
| 9  | 974.4  | 487.7  | 957.4  | 956.4  | R  | 1454.8 | 727.9  | 1437.8 | 1436.8 | 13 |
| 10 | 1071.5 | 536.2  | 1054.4 | 1053.5 | P  | 1298.7 | 649.9  | 1281.7 | 1280.7 | 12 |
| 11 | 1234.5 | 617.8  | 1217.5 | 1216.5 | Y  | 1201.6 | 601.3  | 1184.6 | 1183.6 | 11 |
| 12 | 1321.6 | 661.3  | 1304.5 | 1303.6 | S  | 1038.6 | 519.8  | 1021.5 | 1020.6 | 10 |
| 13 | 1458.6 | 729.8  | 1441.6 | 1440.6 | H  | 951.5  | 476.3  | 934.5  | 933.5  | 9  |
| 14 | 1529.7 | 765.3  | 1512.6 | 1511.7 | A  | 814.5  | 407.7  | 797.5  | 796.5  | 8  |
| 15 | 1642.8 | 821.9  | 1625.7 | 1624.7 | L  | 743.4  | 372.2  | 726.4  | 725.4  | 7  |
| 16 | 1741.8 | 871.4  | 1724.8 | 1723.8 | V  | 630.4  | 315.7  | 613.3  | 612.4  | 6  |
| 17 | 1812.9 | 906.9  | 1795.8 | 1794.8 | A  | 531.3  |        | 514.3  | 513.3  | 5  |
| 18 | 1869.9 | 935.4  | 1852.9 | 1851.9 | G  | 460.3  |        | 443.2  | 442.2  | 4  |
| 19 | 1983.0 | 992.0  | 1965.9 | 1965.0 | I  | 403.2  |        | 386.2  | 385.2  | 3  |
| 20 | 2098.0 | 1049.5 | 2081.0 | 2080.0 | D  | 290.2  |        | 273.1  | 272.1  | 2  |
| 21 | 2272.1 | 1136.5 | 2255.1 | 2254.1 | R  | 175.1  |        | 158.1  |        | 1  |

Gene symbol: LOC675151;Ogdhl

Protein name: oxoglutarate dehydrogenase-like



Protein accession numbers: IPI00342603,IPI00749952,IPI00755352,IPI00756987

Peptide sequence: (R)LPTTTFIGGPENTLSLR(E)

Exclusive (unique to this protein): TRUE

SEQUEST XCorr score: 2.11 SEQUEST DCn score: 0.591

Fix modifications: None

Variable modifications: None

charge: 2 Observed m/z: 908.9913

Actual minus calculated peptide mass (AMU): -0.0063456

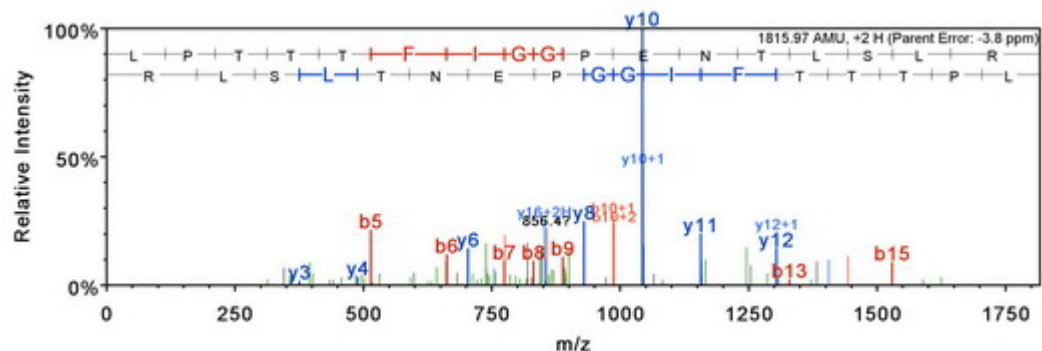

| B  | B ions | B+2H  | B-NH3  | B-H2O  | AA | Y ions | Y+2H  | Y-NH3  | Y-H2O  | Y  |
|----|--------|-------|--------|--------|----|--------|-------|--------|--------|----|
| 1  | 114.1  |       |        |        | L  | 1817.0 | 909.0 | 1800.0 | 1799.0 | 17 |
| 2  | 211.1  |       |        |        | P  | 1703.9 | 852.5 | 1686.9 | 1685.9 | 16 |
| 3  | 312.2  |       |        | 294.2  | T  | 1606.8 | 803.9 | 1589.8 | 1588.8 | 15 |
| 4  | 413.2  |       |        | 395.2  | T  | 1505.8 | 753.4 | 1488.8 | 1487.8 | 14 |
| 5  | 514.3  |       |        | 496.3  | T  | 1404.8 | 702.9 | 1387.7 | 1386.7 | 13 |
| 6  | 661.4  | 331.2 |        | 643.4  | F  | 1303.7 | 652.4 | 1286.7 | 1285.7 | 12 |
| 7  | 774.4  | 387.7 |        | 756.4  | I  | 1156.6 | 578.8 | 1139.6 | 1138.6 | 11 |
| 8  | 831.5  | 416.2 |        | 813.5  | G  | 1043.5 | 522.3 | 1026.5 | 1025.5 | 10 |
| 9  | 888.5  | 444.8 |        | 870.5  | G  | 986.5  | 493.8 | 969.5  | 968.5  | 9  |
| 10 | 985.5  | 493.3 |        | 967.5  | P  | 929.5  | 465.3 | 912.5  | 911.5  | 8  |
| 11 | 1114.6 | 557.8 |        | 1096.6 | E  | 832.5  | 416.7 | 815.4  | 814.4  | 7  |
| 12 | 1228.6 | 614.8 | 1211.6 | 1210.6 | N  | 703.4  | 352.2 | 686.4  | 685.4  | 6  |
| 13 | 1329.7 | 665.3 | 1312.6 | 1311.7 | T  | 589.4  |       | 572.3  | 571.4  | 5  |
| 14 | 1442.8 | 721.9 | 1425.7 | 1424.7 | L  | 488.3  |       | 471.3  | 470.3  | 4  |
| 15 | 1529.8 | 765.4 | 1512.8 | 1511.8 | S  | 375.2  |       | 358.2  | 357.2  | 3  |
| 16 | 1642.9 | 821.9 | 1625.8 | 1624.9 | L  | 288.2  |       | 271.2  |        | 2  |
| 17 | 1817.0 | 909.0 | 1800.0 | 1799.0 | R  | 175.1  |       | 158.1  |        | 1  |

Gene symbol: LOC675789;Rpl24;EG668829

Protein name: similar to ribosomal protein L24

Protein accession numbers: IPI00134202,IPI00323806,IPI00762051

Peptide sequence: (R)AITGASLADIMAK(R)

Exclusive (unique to this protein): TRUE

SEQUEST XCorr score: 2.04 SEQUEST DCn score: 0.625

Fix modifications: None

Variable modifications: None

charge: 2 Observed m/z: 631.3457

Actual minus calculated peptide mass (AMU): 0.0008545

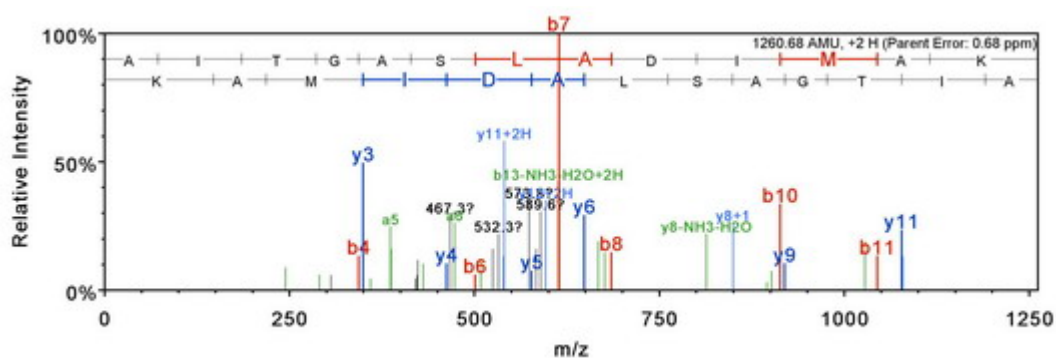

| B  | B ions | B+2H  | B-NH3  | B-H2O  | AA | Y ions | Y+2H  | Y-NH3  | Y-H2O  | Y  |
|----|--------|-------|--------|--------|----|--------|-------|--------|--------|----|
| 1  | 72.0   |       |        |        | A  | 1261.7 | 631.4 | 1244.7 | 1243.7 | 13 |
| 2  | 185.1  |       |        |        | I  | 1190.7 | 595.8 | 1173.6 | 1172.6 | 12 |
| 3  | 286.2  |       |        | 268.2  | T  | 1077.6 | 539.3 | 1060.5 | 1059.5 | 11 |
| 4  | 343.2  |       |        | 325.2  | G  | 976.5  | 488.8 | 959.5  | 958.5  | 10 |
| 5  | 414.2  |       |        | 396.2  | A  | 919.5  | 460.3 | 902.5  | 901.5  | 9  |
| 6  | 501.3  | 251.1 |        | 483.3  | S  | 848.5  | 424.7 | 831.4  | 830.4  | 8  |
| 7  | 614.4  | 307.7 |        | 596.3  | L  | 761.4  | 381.2 | 744.4  | 743.4  | 7  |
| 8  | 685.4  | 343.2 |        | 667.4  | A  | 648.3  | 324.7 | 631.3  | 630.3  | 6  |
| 9  | 800.4  | 400.7 |        | 782.4  | D  | 577.3  |       | 560.3  | 559.3  | 5  |
| 10 | 913.5  | 457.3 |        | 895.5  | I  | 462.3  |       | 445.3  |        | 4  |
| 11 | 1044.5 | 522.8 |        | 1026.5 | M  | 349.2  |       | 332.2  |        | 3  |
| 12 | 1115.6 | 558.3 |        | 1097.6 | A  | 218.2  |       | 201.1  |        | 2  |
| 13 | 1261.7 | 631.4 | 1244.7 | 1243.7 | K  | 147.1  |       | 130.1  |        | 1  |

Gene symbol: LOC676847;EG639162

Protein name: similar to ribosomal protein S15a

Protein accession numbers: IPI00113394,IPI00230660,IPI00749889,IPI00849692

Peptide sequence: (K)HGYIGEFELAD(I)M(A)K

Exclusive (unique to this protein): TRUE

SEQUEST XCorr score: 2.72 SEQUEST DCn score: 0.589

Fix modifications: None

Variable modifications: None

charge: 3

Observed m/z: 567.6024

Actual minus calculated peptide mass (AMU): -0.011954

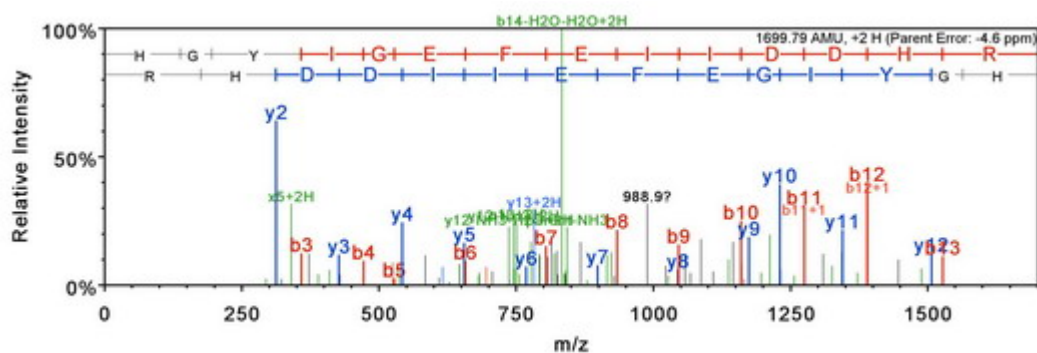

| B  | B Ions | B+2H  | B-NH3  | B-H2O  | A,A | Y Ions | Y+2H  | Y-NH3  | Y-H2O  | Y  |
|----|--------|-------|--------|--------|-----|--------|-------|--------|--------|----|
| 1  | 138.1  | 69.5  |        |        | H   | 1700.8 | 850.9 | 1683.8 | 1682.8 | 14 |
| 2  | 195.1  | 98.0  |        |        | G   | 1563.7 | 782.4 | 1546.7 | 1545.7 | 13 |
| 3  | 358.2  | 179.6 |        |        | Y   | 1506.7 | 753.9 | 1489.7 | 1488.7 | 12 |
| 4  | 471.2  | 236.1 |        |        | I   | 1343.7 | 672.3 | 1326.6 | 1325.7 | 11 |
| 5  | 528.3  | 264.6 |        |        | G   | 1230.6 | 615.8 | 1213.5 | 1212.6 | 10 |
| 6  | 657.3  | 329.2 |        | 639.3  | E   | 1173.5 | 587.3 | 1156.5 | 1155.5 | 9  |
| 7  | 804.4  | 402.7 |        | 786.4  | F   | 1044.5 | 522.8 | 1027.5 | 1026.5 | 8  |
| 8  | 933.4  | 467.2 |        | 915.4  | E   | 897.4  | 449.2 | 880.4  | 879.4  | 7  |
| 9  | 1046.5 | 523.8 |        | 1028.5 | I   | 768.4  | 384.7 | 751.4  | 750.4  | 6  |
| 10 | 1159.6 | 580.3 |        | 1141.6 | I   | 655.3  | 328.2 | 638.3  | 637.3  | 5  |
| 11 | 1274.6 | 637.8 |        | 1256.6 | D   | 542.2  | 271.6 | 525.2  | 524.2  | 4  |
| 12 | 1389.6 | 695.3 |        | 1371.6 | D   | 427.2  | 214.1 | 410.2  | 409.2  | 3  |
| 13 | 1526.7 | 763.9 |        | 1508.7 | H   | 312.2  | 156.6 | 295.2  |        | 2  |
| 14 | 1700.8 | 850.9 | 1683.8 | 1682.8 | R   | 175.1  |       | 158.1  |        | 1  |

Gene symbol: LOC677429;9630033F20Rik

Protein name: Uncharacterized protein C12orf5 homolog

Protein accession numbers: IPI00227451

Peptide sequence: (K)IIQGQGVDAPLSETGFR(Q)

Exclusive (unique to this protein): TRUE

SEQUEST XCorr score: 2.18 SEQUEST DCn score: 0.488

Fix modifications: None

Variable modifications: None

charge: 2 Observed m/z: 894.4644

Actual minus calculated peptide mass (AMU): -0.008423

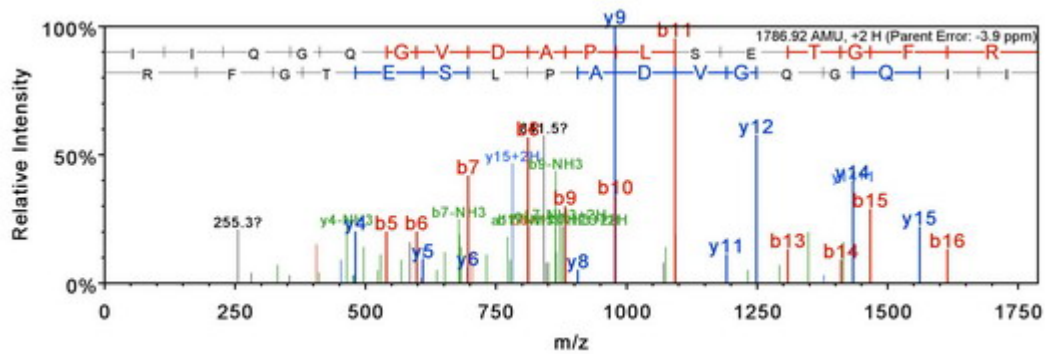

| B  | B Ions | B+2H  | B-NH3  | B-H2O  | AA | Y Ions | Y+2H  | Y-NH3  | Y-H2O  | Y  |
|----|--------|-------|--------|--------|----|--------|-------|--------|--------|----|
| 1  | 114.1  |       |        |        | I  | 1787.9 | 894.5 | 1770.9 | 1769.9 | 17 |
| 2  | 227.2  |       |        |        | I  | 1674.9 | 837.9 | 1657.8 | 1656.8 | 16 |
| 3  | 355.2  |       | 338.2  |        | Q  | 1561.8 | 781.4 | 1544.7 | 1543.8 | 15 |
| 4  | 412.3  |       | 395.2  |        | G  | 1433.7 | 717.4 | 1416.7 | 1415.7 | 14 |
| 5  | 540.3  |       | 523.3  |        | Q  | 1376.7 | 688.8 | 1359.7 | 1358.7 | 13 |
| 6  | 597.3  | 299.2 | 580.3  |        | G  | 1248.6 | 624.8 | 1231.6 | 1230.6 | 12 |
| 7  | 696.4  | 348.7 | 679.4  |        | V  | 1191.6 | 596.3 | 1174.6 | 1173.6 | 11 |
| 8  | 811.4  | 406.2 | 794.4  | 793.4  | D  | 1092.5 | 546.8 | 1075.5 | 1074.5 | 10 |
| 9  | 882.5  | 441.7 | 865.4  | 864.5  | A  | 977.5  | 489.3 | 960.5  | 959.5  | 9  |
| 10 | 979.5  | 490.3 | 962.5  | 961.5  | P  | 906.5  | 453.7 | 889.4  | 888.5  | 8  |
| 11 | 1092.6 | 546.8 | 1075.6 | 1074.6 | L  | 809.4  | 405.2 | 792.4  | 791.4  | 7  |
| 12 | 1179.6 | 590.3 | 1162.6 | 1161.6 | S  | 696.3  | 348.7 | 679.3  | 678.3  | 6  |
| 13 | 1308.7 | 654.8 | 1291.7 | 1290.7 | E  | 609.3  |       | 592.3  | 591.3  | 5  |
| 14 | 1409.7 | 705.4 | 1392.7 | 1391.7 | T  | 480.3  |       | 463.2  | 462.3  | 4  |
| 15 | 1466.8 | 733.9 | 1449.7 | 1448.7 | G  | 379.2  |       | 362.2  |        | 3  |
| 16 | 1613.8 | 807.4 | 1596.8 | 1595.8 | F  | 322.2  |       | 305.2  |        | 2  |
| 17 | 1787.9 | 894.5 | 1770.9 | 1769.9 | R  | 175.1  |       | 158.1  |        | 1  |

Gene symbol: Lrpap1

Protein name: Alpha-2-macroglobulin receptor-associated protein precursor

Protein accession numbers: IPI00469307

Peptide sequence: (K)IQEYNVLLDTLSR(A)

Exclusive (unique to this protein): TRUE

SEQUEST XCorr score: 2.2 SEQUEST DCn score: 0.354

Fix modifications: None

Variable modifications: None

charge: 2

Observed m/z: 782.4194

Actual minus calculated peptide mass (AMU): -0.007568

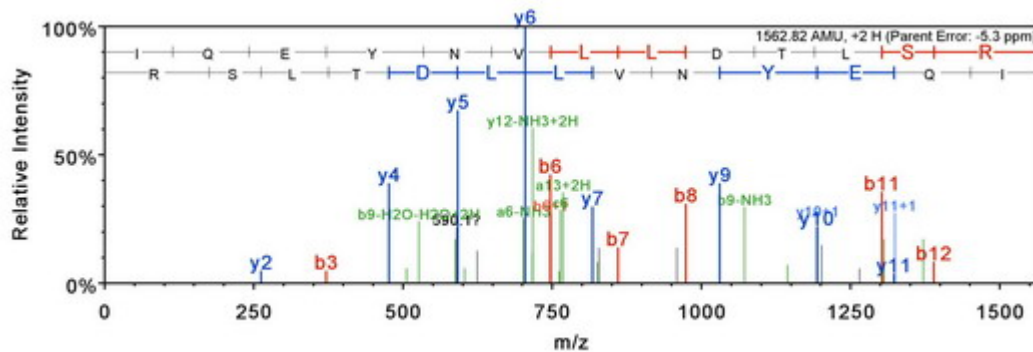

| B  | B ions | B+2H  | B-NH3  | B-H2O  | AA | Y ions | Y+2H  | Y-NH3  | Y-H2O  | Y  |
|----|--------|-------|--------|--------|----|--------|-------|--------|--------|----|
| 1  | 114.1  |       |        |        | I  | 1563.8 | 782.4 | 1546.8 | 1545.8 | 13 |
| 2  | 242.2  |       | 225.1  |        | Q  | 1450.8 | 725.9 | 1433.7 | 1432.7 | 12 |
| 3  | 371.2  |       | 354.2  | 353.2  | E  | 1322.7 | 661.9 | 1305.7 | 1304.7 | 11 |
| 4  | 534.3  |       | 517.2  | 516.3  | Y  | 1193.7 | 597.3 | 1176.6 | 1175.6 | 10 |
| 5  | 648.3  |       | 631.3  | 630.3  | N  | 1030.6 | 515.8 | 1013.6 | 1012.6 | 9  |
| 6  | 747.4  | 374.2 | 730.3  | 729.4  | V  | 916.6  | 458.8 | 899.5  | 898.5  | 8  |
| 7  | 860.5  | 430.7 | 843.4  | 842.4  | L  | 817.5  | 409.2 | 800.5  | 799.5  | 7  |
| 8  | 973.5  | 487.3 | 956.5  | 955.5  | L  | 704.4  | 352.7 | 687.4  | 686.4  | 6  |
| 9  | 1088.6 | 544.8 | 1071.5 | 1070.5 | D  | 591.3  |       | 574.3  | 573.3  | 5  |
| 10 | 1189.6 | 595.3 | 1172.6 | 1171.6 | T  | 476.3  |       | 459.3  | 458.3  | 4  |
| 11 | 1302.7 | 651.9 | 1285.7 | 1284.7 | L  | 375.2  |       | 358.2  | 357.2  | 3  |
| 12 | 1389.7 | 695.4 | 1372.7 | 1371.7 | S  | 262.1  |       | 245.1  | 244.1  | 2  |
| 13 | 1563.8 | 782.4 | 1546.8 | 1545.8 | R  | 175.1  |       | 158.1  |        | 1  |

Gene symbol: Lrrc59

Protein name: Leucine-rich repeat-containing protein 59

Protein accession numbers: IPI00123281,IPI00653744

Peptide sequence: (R)LVTLPVSFAQLK(N)

Exclusive (unique to this protein): TRUE

SEQUEST XCorr score: 2.5 SEQUEST DCn score: 0.433

Fix modifications: None

Variable modifications: None

charge: 2 Observed m/z: 658.4033

Actual minus calculated peptide mass (AMU): -0.0003662

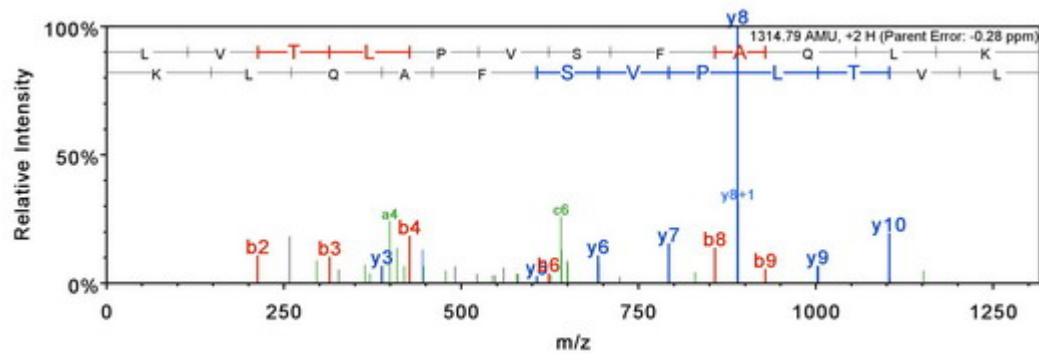

| B  | B ions | B+2H  | B-NH3  | B-H2O  | AA | Y ions | Y+2H  | Y-NH3  | Y-H2O  | Y  |
|----|--------|-------|--------|--------|----|--------|-------|--------|--------|----|
| 1  | 114.1  |       |        |        | L  | 1315.8 | 658.4 | 1298.8 | 1297.8 | 12 |
| 2  | 213.2  |       |        |        | V  | 1202.7 | 601.9 | 1185.7 | 1184.7 | 11 |
| 3  | 314.2  |       |        | 296.2  | T  | 1103.7 | 552.3 | 1086.6 | 1085.6 | 10 |
| 4  | 427.3  |       |        | 409.3  | L  | 1002.6 | 501.8 | 985.6  | 984.6  | 9  |
| 5  | 524.3  |       |        | 506.3  | P  | 889.5  | 445.3 | 872.5  | 871.5  | 8  |
| 6  | 623.4  | 312.2 |        | 605.4  | V  | 792.5  | 396.7 | 775.4  | 774.5  | 7  |
| 7  | 710.5  | 355.7 |        | 692.4  | S  | 693.4  | 347.2 | 676.4  | 675.4  | 6  |
| 8  | 857.5  | 429.3 |        | 839.5  | F  | 606.4  |       | 589.3  |        | 5  |
| 9  | 928.6  | 464.8 |        | 910.5  | A  | 459.3  |       | 442.3  |        | 4  |
| 10 | 1056.6 | 528.8 | 1039.6 | 1038.6 | Q  | 388.3  |       | 371.2  |        | 3  |
| 11 | 1169.7 | 585.4 | 1152.7 | 1151.7 | L  | 260.2  |       | 243.2  |        | 2  |
| 12 | 1315.8 | 658.4 | 1298.8 | 1297.8 | K  | 147.1  |       | 130.1  |        | 1  |

Gene symbol: Lsm1

Protein name: U6 snRNA-associated Sm-like protein LSm1

Protein accession numbers: IPI00121579

Peptide sequence: (R)SIDQFANLVLHQTVER(I)

Exclusive (unique to this protein): TRUE

SEQUEST XCorr score: 2.41 SEQUEST DCn score: 0.625

Fix modifications: None

Variable modifications: None

charge: 2

Observed m/z: 935.4913

Actual minus calculated peptide mass (AMU): -0.007568

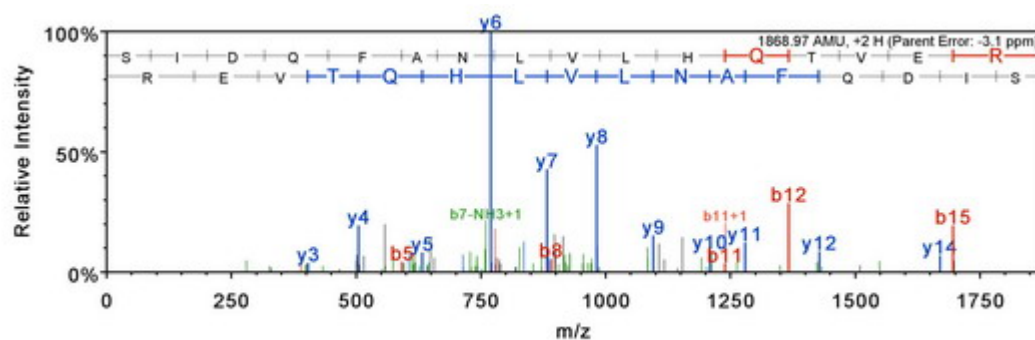

| B  | B ions | B+2H  | B-NH3  | B-H2O  | AA | Y ions | Y+2H  | Y-NH3  | Y-H2O  | Y  |
|----|--------|-------|--------|--------|----|--------|-------|--------|--------|----|
| 1  | 88.0   |       |        | 70.0   | S  | 1870.0 | 935.5 | 1853.0 | 1852.0 | 16 |
| 2  | 201.1  |       |        | 183.1  | I  | 1783.0 | 892.0 | 1765.9 | 1764.9 | 15 |
| 3  | 316.2  |       |        | 298.1  | D  | 1669.9 | 835.4 | 1652.8 | 1651.9 | 14 |
| 4  | 444.2  |       | 427.2  | 426.2  | Q  | 1554.8 | 777.9 | 1537.8 | 1536.8 | 13 |
| 5  | 591.3  |       | 574.3  | 573.3  | F  | 1426.8 | 713.9 | 1409.8 | 1408.8 | 12 |
| 6  | 662.3  | 331.7 | 645.3  | 644.3  | A  | 1279.7 | 640.4 | 1262.7 | 1261.7 | 11 |
| 7  | 776.4  | 388.7 | 759.3  | 758.4  | N  | 1208.7 | 604.8 | 1191.7 | 1190.7 | 10 |
| 8  | 889.4  | 445.2 | 872.4  | 871.4  | L  | 1094.6 | 547.8 | 1077.6 | 1076.6 | 9  |
| 9  | 988.5  | 494.8 | 971.5  | 970.5  | V  | 981.6  | 491.3 | 964.5  | 963.5  | 8  |
| 10 | 1101.6 | 551.3 | 1084.6 | 1083.6 | L  | 882.5  | 441.7 | 865.5  | 864.5  | 7  |
| 11 | 1238.7 | 619.8 | 1221.6 | 1220.6 | H  | 769.4  | 385.2 | 752.4  | 751.4  | 6  |
| 12 | 1366.7 | 683.9 | 1349.7 | 1348.7 | Q  | 632.3  |       | 615.3  | 614.3  | 5  |
| 13 | 1467.8 | 734.4 | 1450.7 | 1449.8 | T  | 504.3  |       | 487.3  | 486.3  | 4  |
| 14 | 1566.8 | 783.9 | 1549.8 | 1548.8 | V  | 403.2  |       | 386.2  | 385.2  | 3  |
| 15 | 1695.9 | 848.4 | 1678.8 | 1677.9 | E  | 304.2  |       | 287.1  | 286.2  | 2  |
| 16 | 1870.0 | 935.5 | 1853.0 | 1852.0 | R  | 175.1  |       | 158.1  |        | 1  |

Gene symbol: Lsm14b

Protein name: LSM14 protein homolog B

Protein accession numbers: IPI00229470

Peptide sequence: (R)YEGILYTIIDTNDNSTVALAK(V)

Exclusive (unique to this protein): TRUE

SEQUEST XCorr score: 2 SEQUEST DCn score: 0.585

Fix modifications: None

Variable modifications: None

charge: 2

Observed m/z: 1044.0276

Actual minus calculated peptide mass (AMU): -0.007568

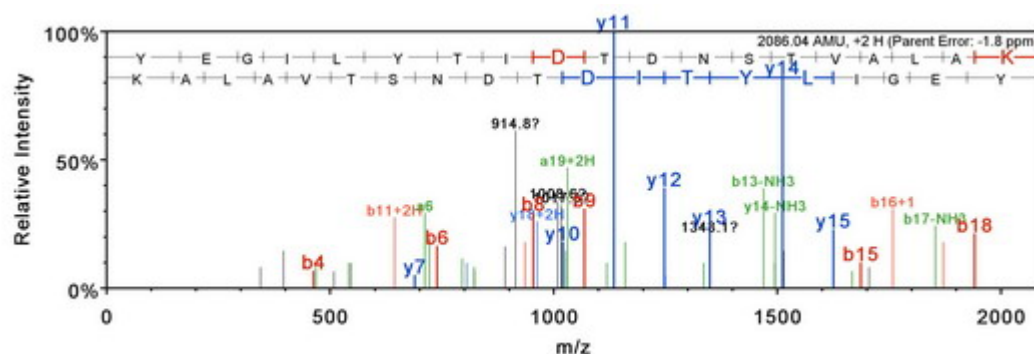

| B  | B ions | B+2H   | B-NH3  | B-H2O  | AA | Y ions | Y+2H   | Y-NH3  | Y-H2O  | Y  |
|----|--------|--------|--------|--------|----|--------|--------|--------|--------|----|
| 1  | 164.1  |        |        |        | Y  | 2087.1 | 1044.0 | 2070.0 | 2069.0 | 19 |
| 2  | 293.1  |        |        | 275.1  | E  | 1924.0 | 962.5  | 1907.0 | 1906.0 | 18 |
| 3  | 350.1  |        |        | 332.1  | G  | 1795.0 | 898.0  | 1777.9 | 1776.9 | 17 |
| 4  | 463.2  |        |        | 445.2  | I  | 1737.9 | 869.5  | 1720.9 | 1719.9 | 16 |
| 5  | 576.3  |        |        | 558.3  | L  | 1624.8 | 812.9  | 1607.8 | 1606.8 | 15 |
| 6  | 739.4  | 370.2  |        | 721.4  | Y  | 1511.8 | 756.4  | 1494.7 | 1493.8 | 14 |
| 7  | 840.4  | 420.7  |        | 822.4  | T  | 1348.7 | 674.9  | 1331.7 | 1330.7 | 13 |
| 8  | 953.5  | 477.3  |        | 935.5  | I  | 1247.7 | 624.3  | 1230.6 | 1229.6 | 12 |
| 9  | 1068.5 | 534.8  |        | 1050.5 | D  | 1134.6 | 567.8  | 1117.5 | 1116.5 | 11 |
| 10 | 1169.6 | 585.3  |        | 1151.6 | T  | 1019.5 | 510.3  | 1002.5 | 1001.5 | 10 |
| 11 | 1284.6 | 642.8  |        | 1266.6 | D  | 918.5  | 459.8  | 901.5  | 900.5  | 9  |
| 12 | 1398.6 | 699.8  | 1381.6 | 1380.6 | N  | 803.5  | 402.2  | 786.4  | 785.5  | 8  |
| 13 | 1485.7 | 743.3  | 1468.7 | 1467.7 | S  | 689.4  | 345.2  | 672.4  | 671.4  | 7  |
| 14 | 1586.7 | 793.9  | 1569.7 | 1568.7 | T  | 602.4  | 301.7  | 585.4  | 584.4  | 6  |
| 15 | 1685.8 | 843.4  | 1668.8 | 1667.8 | V  | 501.3  |        | 484.3  |        | 5  |
| 16 | 1756.8 | 878.9  | 1739.8 | 1738.8 | A  | 402.3  |        | 385.3  |        | 4  |
| 17 | 1869.9 | 935.5  | 1852.9 | 1851.9 | L  | 331.2  |        | 314.2  |        | 3  |
| 18 | 1941.0 | 971.0  | 1923.9 | 1922.9 | A  | 218.2  |        | 201.1  |        | 2  |
| 19 | 2087.1 | 1044.0 | 2070.0 | 2069.0 | K  | 147.1  |        | 130.1  |        | 1  |

Gene symbol: Lsm2

Protein name: SnRNP core Sm protein homolog Sm-X5

Protein accession numbers: IPI00136054,IPI00461314

Peptide sequence: (R)YVQLPADEVDTQLLQDAAR(K)

Exclusive (unique to this protein): TRUE

SEQUEST XCorr score: 3.57 SEQUEST DCn score: 0.681

Fix modifications: None

Variable modifications: None

charge: 2

Observed m/z: 1073.0425

Actual minus calculated peptide mass (AMU): -0.005859

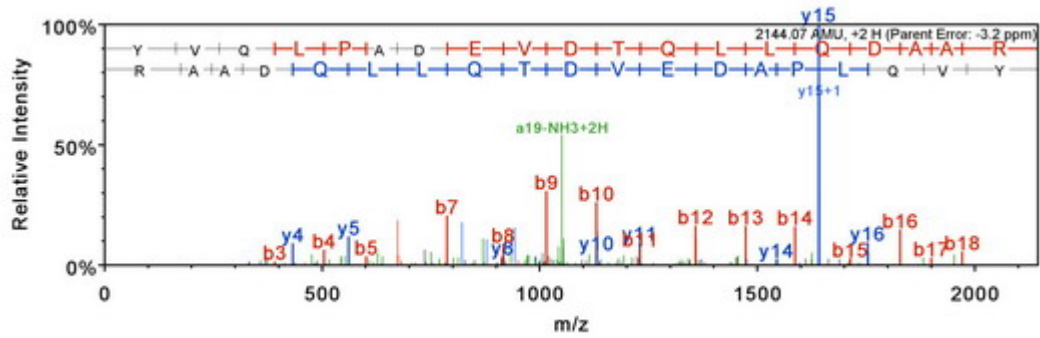

| B  | B ions | B+2H   | B-NH3  | B-H2O  | AA | Y ions | Y+2H   | Y-NH3  | Y-H2O  | Y  |
|----|--------|--------|--------|--------|----|--------|--------|--------|--------|----|
| 1  | 164.1  |        |        |        | Y  | 2145.1 | 1073.0 | 2128.1 | 2127.1 | 19 |
| 2  | 263.1  |        |        |        | V  | 1982.0 | 991.5  | 1965.0 | 1964.0 | 18 |
| 3  | 391.2  |        | 374.2  |        | Q  | 1883.0 | 942.0  | 1865.9 | 1864.9 | 17 |
| 4  | 504.3  |        | 487.3  |        | L  | 1754.9 | 878.0  | 1737.9 | 1736.9 | 16 |
| 5  | 601.3  |        | 584.3  |        | P  | 1641.8 | 821.4  | 1624.8 | 1623.8 | 15 |
| 6  | 672.4  | 336.7  | 655.4  |        | A  | 1544.8 | 772.9  | 1527.7 | 1526.8 | 14 |
| 7  | 787.4  | 394.2  | 770.4  | 769.4  | D  | 1473.7 | 737.4  | 1456.7 | 1455.7 | 13 |
| 8  | 916.4  | 458.7  | 899.4  | 898.4  | E  | 1358.7 | 679.9  | 1341.7 | 1340.7 | 12 |
| 9  | 1015.5 | 508.3  | 998.5  | 997.5  | V  | 1229.7 | 615.3  | 1212.6 | 1211.6 | 11 |
| 10 | 1130.5 | 565.8  | 1113.5 | 1112.5 | D  | 1130.6 | 565.8  | 1113.5 | 1112.6 | 10 |
| 11 | 1231.6 | 616.3  | 1214.6 | 1213.6 | T  | 1015.6 | 508.3  | 998.5  | 997.5  | 9  |
| 12 | 1359.6 | 680.3  | 1342.6 | 1341.6 | Q  | 914.5  | 457.8  | 897.5  | 896.5  | 8  |
| 13 | 1472.7 | 736.9  | 1455.7 | 1454.7 | L  | 786.5  | 393.7  | 769.4  | 768.4  | 7  |
| 14 | 1585.8 | 793.4  | 1568.8 | 1567.8 | L  | 673.4  | 337.2  | 656.3  | 655.4  | 6  |
| 15 | 1713.9 | 857.4  | 1696.8 | 1695.9 | Q  | 560.3  |        | 543.3  | 542.3  | 5  |
| 16 | 1828.9 | 915.0  | 1811.9 | 1810.9 | D  | 432.2  |        | 415.2  | 414.2  | 4  |
| 17 | 1899.9 | 950.5  | 1882.9 | 1881.9 | A  | 317.2  |        | 300.2  |        | 3  |
| 18 | 1971.0 | 986.0  | 1953.9 | 1953.0 | A  | 246.2  |        | 229.1  |        | 2  |
| 19 | 2145.1 | 1073.0 | 2128.1 | 2127.1 | R  | 175.1  |        | 158.1  |        | 1  |

Gene symbol: Lsm3

Protein name: U6 snRNA-associated Sm-like protein LSm3

Protein accession numbers: IPI00230388

Peptide sequence: (R)GDGVVLVAPPLR(V)

Exclusive (unique to this protein): TRUE

SEQUEST XCorr score: 2.62 SEQUEST DCn score: 0.589

Fix modifications: None

Variable modifications: None

charge: 2

Observed m/z: 596.8527

Actual minus calculated peptide mass (AMU): -0.008057



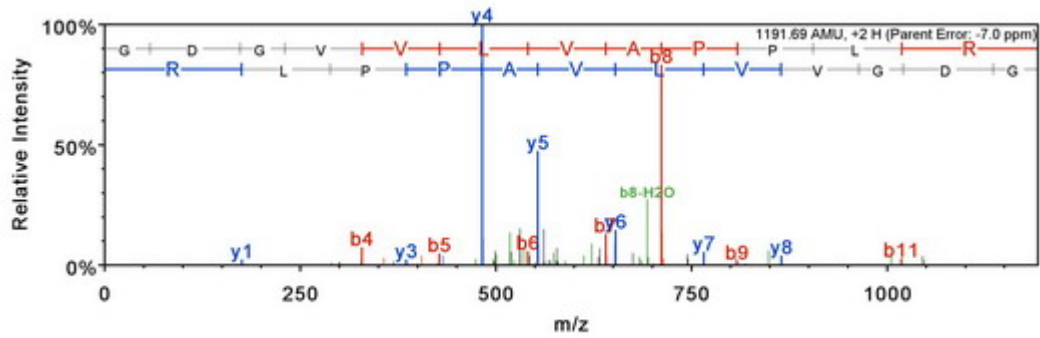

| B  | B ions | B+2H  | B-NH3  | B-H2O  | A,A | Y ions | Y+2H  | Y-NH3  | Y-H2O  | Y  |
|----|--------|-------|--------|--------|-----|--------|-------|--------|--------|----|
| 1  | 58.0   |       |        |        | G   | 1192.7 | 596.9 | 1175.7 | 1174.7 | 12 |
| 2  | 173.1  |       |        | 155.1  | D   | 1135.7 | 568.4 | 1118.7 | 1117.7 | 11 |
| 3  | 230.1  |       |        | 212.1  | G   | 1020.7 | 510.8 | 1003.6 |        | 10 |
| 4  | 329.2  |       |        | 311.1  | V   | 963.6  | 482.3 | 946.6  |        | 9  |
| 5  | 428.2  |       |        | 410.2  | V   | 864.6  | 432.8 | 847.5  |        | 8  |
| 6  | 541.3  | 271.1 |        | 523.3  | L   | 765.5  | 383.3 | 748.5  |        | 7  |
| 7  | 640.4  | 320.7 |        | 622.4  | V   | 652.4  | 326.7 | 635.4  |        | 6  |
| 8  | 711.4  | 356.2 |        | 693.4  | A   | 553.4  |       | 536.3  |        | 5  |
| 9  | 808.5  | 404.7 |        | 790.5  | P   | 482.3  |       | 465.3  |        | 4  |
| 10 | 905.5  | 453.3 |        | 887.5  | P   | 385.3  |       | 368.2  |        | 3  |
| 11 | 1018.6 | 509.8 |        | 1000.6 | L   | 288.2  |       | 271.2  |        | 2  |
| 12 | 1192.7 | 596.9 | 1175.7 | 1174.7 | R   | 175.1  |       | 158.1  |        | 1  |

Gene symbol: Lsm4

Protein name: 13 days embryo liver cDNA, RIKEN full-length enriched library, clone:2510005B08 product:U6 snRNA-associated SM-like protein 4, full insert sequence

Protein accession numbers: IPI00134784

Peptide sequence: (R)IPDEIIDMVR(E)

Exclusive (unique to this protein): TRUE

SEQUEST XCorr score: 2.1 SEQUEST DCn score: 0.467

Fix modifications: None

Variable modifications: None

charge: 2

Observed m/z: 600.8154

Actual minus calculated peptide mass (AMU): -0.0070758

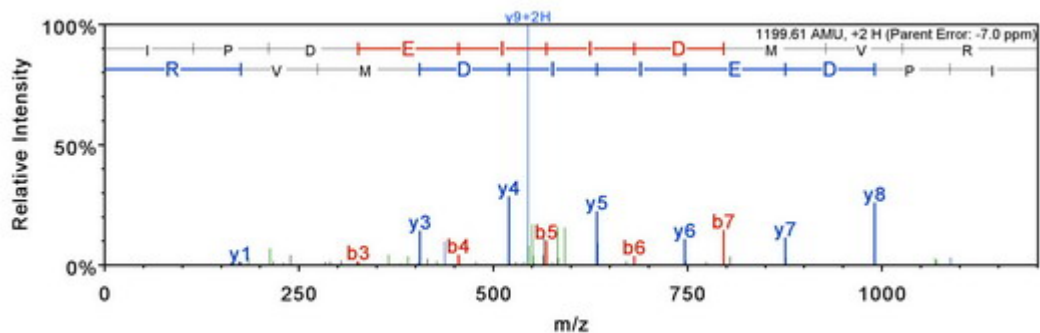

| B  | B Ions | B+2H  | B-NH3  | B-H2O  | A,A | Y Ions | Y+2H  | Y-NH3  | Y-H2O  | Y  |
|----|--------|-------|--------|--------|-----|--------|-------|--------|--------|----|
| 1  | 114.1  |       |        |        | I   | 1200.6 | 600.8 | 1183.6 | 1182.6 | 10 |
| 2  | 211.1  |       |        |        | P   | 1087.5 | 544.3 | 1070.5 | 1069.5 | 9  |
| 3  | 326.2  |       |        | 308.2  | D   | 990.5  | 495.8 | 973.5  | 972.5  | 8  |
| 4  | 455.2  |       |        | 437.2  | E   | 875.5  | 438.2 | 858.4  | 857.5  | 7  |
| 5  | 568.3  |       |        | 550.3  | I   | 746.4  | 373.7 | 729.4  | 728.4  | 6  |
| 6  | 681.4  | 341.2 |        | 663.4  | I   | 633.3  |       | 616.3  | 615.3  | 5  |
| 7  | 796.4  | 398.7 |        | 778.4  | D   | 520.3  |       | 503.2  | 502.2  | 4  |
| 8  | 927.5  | 464.2 |        | 909.4  | M   | 405.2  |       | 388.2  |        | 3  |
| 9  | 1026.5 | 513.8 |        | 1008.5 | V   | 274.2  |       | 257.2  |        | 2  |
| 10 | 1200.6 | 600.8 | 1183.6 | 1182.6 | R   | 175.1  |       | 158.1  |        | 1  |

Gene symbol: Ltb4dh

Protein name: NADP-dependent leukotriene B4 12-hydroxydehydrogenase

Protein accession numbers: IPI00131887

Peptide sequence: (R)TGPCPQGPAPVVIYQQLR(M)

Exclusive (unique to this protein): TRUE

SEQUEST XCorr score: 2.06 SEQUEST DCn score: 0.639

Fix modifications: C4: Carbamidomethyl (+57.02) Variable modifications: None

charge: 2

Observed m/z: 1055.5388

Actual minus calculated peptide mass (AMU): -0.005859

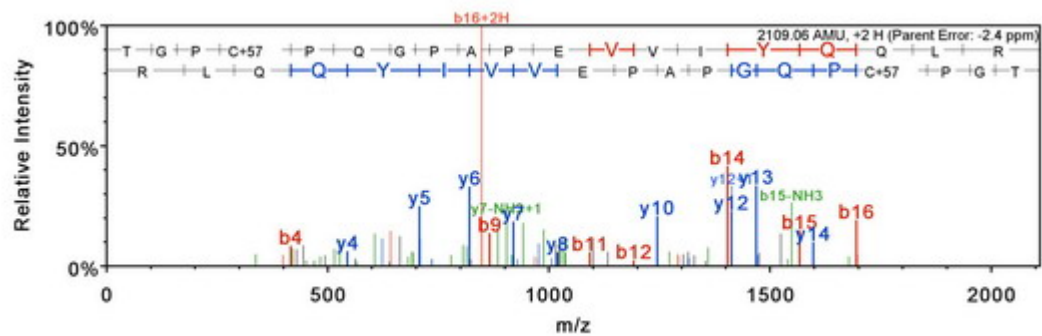

| B  | B Ions | B+2H   | B-NH3  | B-H2O  | AA   | Y Ions | Y+2H   | Y-NH3  | Y-H2O  | Y  |
|----|--------|--------|--------|--------|------|--------|--------|--------|--------|----|
| 1  | 102.1  |        |        | 84.0   | T    | 2110.1 | 1055.5 | 2093.1 | 2092.1 | 19 |
| 2  | 159.1  |        |        | 141.1  | G    | 2009.0 | 1005.0 | 1992.0 | 1991.0 | 18 |
| 3  | 256.1  |        |        | 238.1  | P    | 1952.0 | 976.5  | 1935.0 | 1934.0 | 17 |
| 4  | 416.2  |        |        | 398.2  | C+57 | 1855.0 | 928.0  | 1837.9 | 1836.9 | 16 |
| 5  | 513.2  |        |        | 495.2  | P    | 1694.9 | 848.0  | 1677.9 | 1676.9 | 15 |
| 6  | 641.3  | 321.1  | 624.3  | 623.3  | Q    | 1597.9 | 799.4  | 1580.8 | 1579.9 | 14 |
| 7  | 698.3  | 349.7  | 681.3  | 680.3  | G    | 1469.8 | 735.4  | 1452.8 | 1451.8 | 13 |
| 8  | 795.4  | 398.2  | 778.3  | 777.3  | P    | 1412.8 | 706.9  | 1395.8 | 1394.8 | 12 |
| 9  | 866.4  | 433.7  | 849.4  | 848.4  | A    | 1315.7 | 658.4  | 1298.7 | 1297.7 | 11 |
| 10 | 963.4  | 482.2  | 946.4  | 945.4  | P    | 1244.7 | 622.9  | 1227.7 | 1226.7 | 10 |
| 11 | 1092.5 | 546.7  | 1075.5 | 1074.5 | E    | 1147.7 | 574.3  | 1130.6 | 1129.6 | 9  |
| 12 | 1191.5 | 596.3  | 1174.5 | 1173.5 | V    | 1018.6 | 509.8  | 1001.6 |        | 8  |
| 13 | 1290.6 | 645.8  | 1273.6 | 1272.6 | V    | 919.5  | 460.3  | 902.5  |        | 7  |
| 14 | 1403.7 | 702.4  | 1386.7 | 1385.7 | I    | 820.5  | 410.7  | 803.4  |        | 6  |
| 15 | 1566.8 | 783.9  | 1549.7 | 1548.8 | Y    | 707.4  |        | 690.4  |        | 5  |
| 16 | 1694.8 | 847.9  | 1677.8 | 1676.8 | Q    | 544.3  |        | 527.3  |        | 4  |
| 17 | 1822.9 | 911.9  | 1805.9 | 1804.9 | Q    | 416.3  |        | 399.2  |        | 3  |
| 18 | 1936.0 | 968.5  | 1918.9 | 1918.0 | L    | 288.2  |        | 271.2  |        | 2  |
| 19 | 2110.1 | 1055.5 | 2093.1 | 2092.1 | R    | 175.1  |        | 158.1  |        | 1  |

Gene symbol: Lym4

Protein name: LYR motif-containing protein 4

Protein accession numbers: IPI00169804

Peptide sequence: (K)NVKDPVEIQALVNK(A)

Exclusive (unique to this protein): TRUE

SEQUEST XCorr score: 2.01 SEQUEST DCn score: 0.592

Fix modifications: None

Variable modifications: None

charge: 2

Observed m/z: 783.9481

Actual minus calculated peptide mass (AMU): 0.0028056

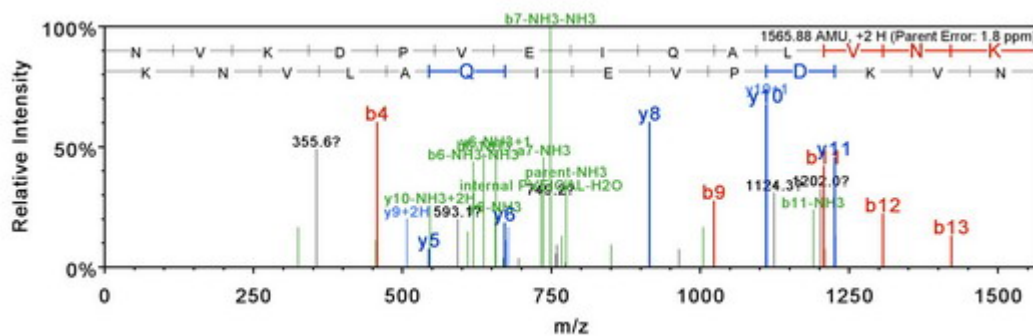

| B  | B ions | B+2H  | B-NH3  | B-H2O  | AA | Y ions | Y+2H  | Y-NH3  | Y-H2O  | Y  |
|----|--------|-------|--------|--------|----|--------|-------|--------|--------|----|
| 1  | 115.1  |       | 98.0   |        | N  | 1566.9 | 784.0 | 1549.9 | 1548.9 | 14 |
| 2  | 214.1  |       | 197.1  |        | V  | 1452.8 | 726.9 | 1435.8 | 1434.8 | 13 |
| 3  | 342.2  | 171.6 | 325.2  |        | K  | 1353.8 | 677.4 | 1336.8 | 1335.8 | 12 |
| 4  | 457.2  | 229.1 | 440.2  | 439.2  | D  | 1225.7 | 613.3 | 1208.7 | 1207.7 | 11 |
| 5  | 554.3  | 277.7 | 537.3  | 536.3  | P  | 1110.7 | 555.8 | 1093.6 | 1092.6 | 10 |
| 6  | 653.4  | 327.2 | 636.3  | 635.4  | V  | 1013.6 | 507.3 | 996.6  | 995.6  | 9  |
| 7  | 782.4  | 391.7 | 765.4  | 764.4  | E  | 914.5  | 457.8 | 897.5  | 896.5  | 8  |
| 8  | 895.5  | 448.3 | 878.5  | 877.5  | I  | 785.5  | 393.3 | 768.5  |        | 7  |
| 9  | 1023.6 | 512.3 | 1006.5 | 1005.5 | Q  | 672.4  | 336.7 | 655.4  |        | 6  |
| 10 | 1094.6 | 547.8 | 1077.6 | 1076.6 | A  | 544.4  |       | 527.3  |        | 5  |
| 11 | 1207.7 | 604.3 | 1190.6 | 1189.7 | L  | 473.3  |       | 456.3  |        | 4  |
| 12 | 1306.7 | 653.9 | 1289.7 | 1288.7 | V  | 360.2  |       | 343.2  |        | 3  |
| 13 | 1420.8 | 710.9 | 1403.8 | 1402.8 | N  | 261.2  |       | 244.1  |        | 2  |
| 14 | 1566.9 | 784.0 | 1549.9 | 1548.9 | K  | 147.1  |       | 130.1  |        | 1  |

Gene symbol: Lyz

Protein name: Lysozyme C type P precursor

Protein accession numbers: IPI00113427

Peptide sequence: (R)STDYGIFQINSR(Y)

Exclusive (unique to this protein): TRUE

SEQUEST XCorr score: 3.06 SEQUEST DCn score: 0.549

Fix modifications: None

Variable modifications: None

charge: 2

Observed m/z: 700.8396

Actual minus calculated peptide mass (AMU): -0.009644

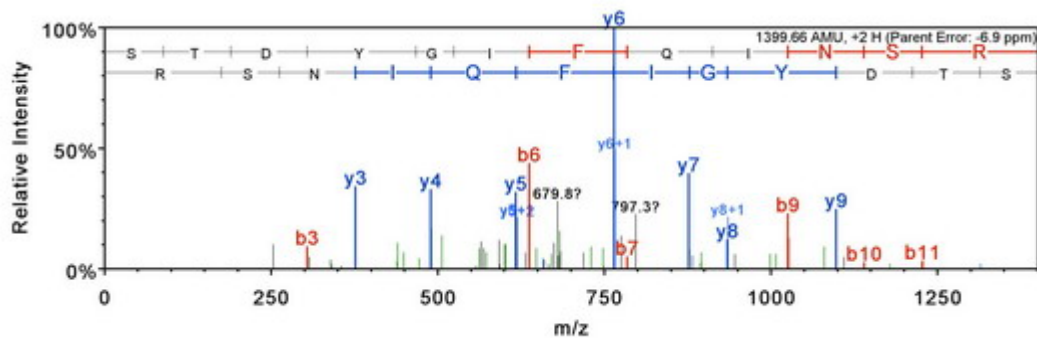

| B  | B ions | B+2H  | B-NH3  | B-H2O  | AA | Y ions | Y+2H  | Y-NH3  | Y-H2O  | Y  |
|----|--------|-------|--------|--------|----|--------|-------|--------|--------|----|
| 1  | 88.0   |       |        | 70.0   | S  | 1400.7 | 700.8 | 1383.7 | 1382.7 | 12 |
| 2  | 189.1  |       |        | 171.1  | T  | 1313.7 | 657.3 | 1296.6 | 1295.6 | 11 |
| 3  | 304.1  |       |        | 286.1  | D  | 1212.6 | 606.8 | 1195.6 | 1194.6 | 10 |
| 4  | 467.2  |       |        | 449.2  | Y  | 1097.6 | 549.3 | 1080.5 | 1079.6 | 9  |
| 5  | 524.2  |       |        | 506.2  | G  | 934.5  | 467.8 | 917.5  | 916.5  | 8  |
| 6  | 637.3  | 319.2 |        | 619.3  | I  | 877.5  | 439.3 | 860.5  | 859.5  | 7  |
| 7  | 784.4  | 392.7 |        | 766.3  | F  | 764.4  | 382.7 | 747.4  | 746.4  | 6  |
| 8  | 912.4  | 456.7 | 895.4  | 894.4  | Q  | 617.3  |       | 600.3  | 599.3  | 5  |
| 9  | 1025.5 | 513.3 | 1008.5 | 1007.5 | I  | 489.3  |       | 472.3  | 471.3  | 4  |
| 10 | 1139.5 | 570.3 | 1122.5 | 1121.5 | N  | 376.2  |       | 359.2  | 358.2  | 3  |
| 11 | 1226.6 | 613.8 | 1209.5 | 1208.6 | S  | 262.1  |       | 245.1  | 244.1  | 2  |
| 12 | 1400.7 | 700.8 | 1383.7 | 1382.7 | R  | 175.1  |       | 158.1  |        | 1  |

Gene symbol: Mad211

Protein name: Mitotic spindle assembly checkpoint protein MAD2A

Protein accession numbers: IPI00323422

Peptide sequence: (K)WEESGPQFITNCEEV(L)

Exclusive (unique to this protein): TRUE

SEQUEST XCorr score: 2.02 SEQUEST DCn score: 0.579

Fix modifications: C12: Carbamidomethyl (+57.02) Variable modifications: None

charge: 2

Observed m/z: 990.9389

Actual minus calculated peptide mass (AMU): -0.006104

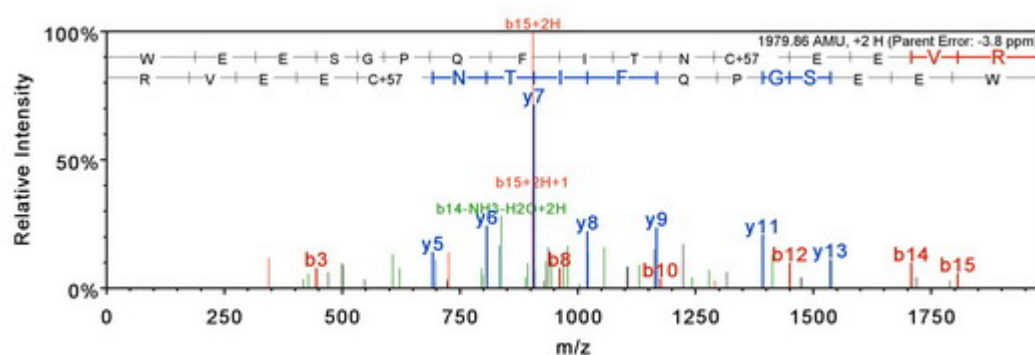

| B  | B ions | B+2H  | B-NH3  | B-H2O  | A,A  | Y ions | Y+2H  | Y-NH3  | Y-H2O  | Y  |
|----|--------|-------|--------|--------|------|--------|-------|--------|--------|----|
| 1  | 187.1  |       |        |        | W    | 1980.9 | 990.9 | 1963.9 | 1962.9 | 16 |
| 2  | 316.1  |       |        | 298.1  | E    | 1794.8 | 897.9 | 1777.8 | 1776.8 | 15 |
| 3  | 445.2  |       |        | 427.2  | E    | 1665.8 | 833.4 | 1648.7 | 1647.7 | 14 |
| 4  | 532.2  |       |        | 514.2  | S    | 1536.7 | 768.9 | 1519.7 | 1518.7 | 13 |
| 5  | 589.2  |       |        | 571.2  | G    | 1449.7 | 725.3 | 1432.7 | 1431.7 | 12 |
| 6  | 686.3  | 343.6 |        | 668.3  | P    | 1392.7 | 696.8 | 1375.6 | 1374.7 | 11 |
| 7  | 814.3  | 407.7 | 797.3  | 796.3  | Q    | 1295.6 | 648.3 | 1278.6 | 1277.6 | 10 |
| 8  | 961.4  | 481.2 | 944.4  | 943.4  | F    | 1167.5 | 584.3 | 1150.5 | 1149.5 | 9  |
| 9  | 1074.5 | 537.8 | 1057.5 | 1056.5 | I    | 1020.5 | 510.7 | 1003.5 | 1002.5 | 8  |
| 10 | 1175.5 | 588.3 | 1158.5 | 1157.5 | T    | 907.4  | 454.2 | 890.4  | 889.4  | 7  |
| 11 | 1289.6 | 645.3 | 1272.5 | 1271.6 | N    | 806.4  | 403.7 | 789.3  | 788.3  | 6  |
| 12 | 1449.6 | 725.3 | 1432.6 | 1431.6 | C+57 | 692.3  |       | 675.3  | 674.3  | 5  |
| 13 | 1578.7 | 789.8 | 1561.6 | 1560.6 | E    | 532.3  |       | 515.3  | 514.3  | 4  |
| 14 | 1707.7 | 854.4 | 1690.7 | 1689.7 | E    | 403.2  |       | 386.2  | 385.2  | 3  |
| 15 | 1806.8 | 903.9 | 1789.7 | 1788.8 | V    | 274.2  |       | 257.2  |        | 2  |
| 16 | 1980.9 | 990.9 | 1963.9 | 1962.9 | R    | 175.1  |       | 158.1  |        | 1  |

Gene symbol: Magmas

Protein name: Mitochondrial import inner membrane translocase subunit TIM16

Protein accession numbers: IPI00133167,IPI00762013

Peptide sequence: (R)AGHQSAASNL SGLSLQEAQQILNVSK(L)

Exclusive (unique to this protein): TRUE

SEQUEST XCorr score: 2.68 SEQUEST DCn score: 0.558

Fix modifications: None

Variable modifications: None

charge: 3

Observed m/z: 908.1392

Actual minus calculated peptide mass (AMU): -0.01001

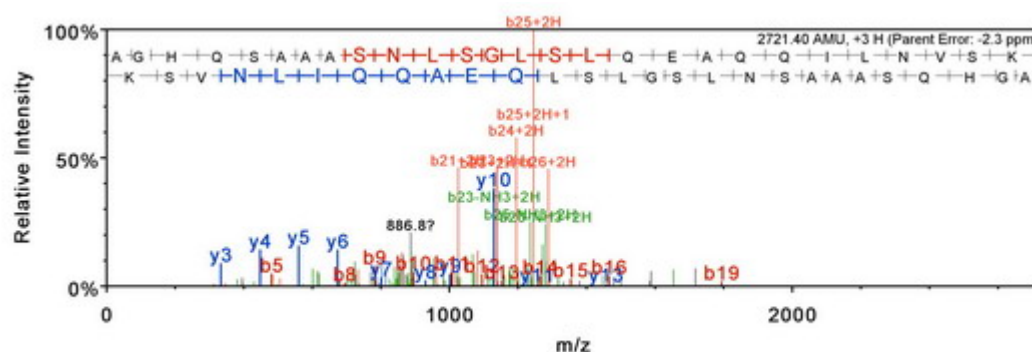

| B  | B ions | B+2H   | B-NH3  | B-H2O  | AA | Y ions | Y+2H   | Y-NH3  | Y-H2O  | Y  |
|----|--------|--------|--------|--------|----|--------|--------|--------|--------|----|
| 1  | 72.0   |        |        |        | A  | 2722.4 | 1361.7 | 2705.4 | 2704.4 | 27 |
| 2  | 129.1  |        |        |        | G  | 2651.4 | 1326.2 | 2634.3 | 2633.4 | 26 |
| 3  | 266.1  | 133.6  |        |        | H  | 2594.3 | 1297.7 | 2577.3 | 2576.3 | 25 |
| 4  | 394.2  | 197.6  | 377.2  |        | Q  | 2457.3 | 1229.2 | 2440.3 | 2439.3 | 24 |
| 5  | 481.2  | 241.1  | 464.2  | 463.2  | S  | 2329.2 | 1165.1 | 2312.2 | 2311.2 | 23 |
| 6  | 552.3  | 276.6  | 535.2  | 534.2  | A  | 2242.2 | 1121.6 | 2225.2 | 2224.2 | 22 |
| 7  | 623.3  | 312.2  | 606.3  | 605.3  | A  | 2171.2 | 1086.1 | 2154.1 | 2153.2 | 21 |
| 8  | 694.3  | 347.7  | 677.3  | 676.3  | A  | 2100.1 | 1050.6 | 2083.1 | 2082.1 | 20 |
| 9  | 781.4  | 391.2  | 764.3  | 763.4  | S  | 2029.1 | 1015.1 | 2012.1 | 2011.1 | 19 |
| 10 | 895.4  | 448.2  | 878.4  | 877.4  | N  | 1942.1 | 971.5  | 1925.0 | 1924.1 | 18 |
| 11 | 1008.5 | 504.8  | 991.5  | 990.5  | L  | 1828.0 | 914.5  | 1811.0 | 1810.0 | 17 |
| 12 | 1095.5 | 548.3  | 1078.5 | 1077.5 | S  | 1714.9 | 858.0  | 1697.9 | 1696.9 | 16 |
| 13 | 1152.5 | 576.8  | 1135.5 | 1134.5 | G  | 1627.9 | 814.5  | 1610.9 | 1609.9 | 15 |
| 14 | 1265.6 | 633.3  | 1248.6 | 1247.6 | L  | 1570.9 | 785.9  | 1553.9 | 1552.9 | 14 |
| 15 | 1352.7 | 676.8  | 1335.6 | 1334.7 | S  | 1457.8 | 729.4  | 1440.8 | 1439.8 | 13 |
| 16 | 1465.7 | 733.4  | 1448.7 | 1447.7 | L  | 1370.8 | 685.9  | 1353.7 | 1352.8 | 12 |
| 17 | 1593.8 | 797.4  | 1576.8 | 1575.8 | Q  | 1257.7 | 629.3  | 1240.7 | 1239.7 | 11 |
| 18 | 1722.8 | 861.9  | 1705.8 | 1704.8 | E  | 1129.6 | 565.3  | 1112.6 | 1111.6 | 10 |
| 19 | 1793.9 | 897.4  | 1776.9 | 1775.9 | A  | 1000.6 | 500.8  | 983.6  | 982.6  | 9  |
| 20 | 1921.9 | 961.5  | 1904.9 | 1903.9 | Q  | 929.5  | 465.3  | 912.5  | 911.5  | 8  |
| 21 | 2050.0 | 1025.5 | 2033.0 | 2032.0 | Q  | 801.5  | 401.3  | 784.5  | 783.5  | 7  |
| 22 | 2163.1 | 1082.0 | 2146.1 | 2145.1 | I  | 673.4  | 337.2  | 656.4  | 655.4  | 6  |
| 23 | 2276.2 | 1138.6 | 2259.1 | 2258.2 | L  | 560.3  |        | 543.3  | 542.3  | 5  |
| 24 | 2390.2 | 1195.6 | 2373.2 | 2372.2 | N  | 447.3  |        | 430.2  | 429.3  | 4  |
| 25 | 2489.3 | 1245.1 | 2472.3 | 2471.3 | V  | 333.2  |        | 316.2  | 315.2  | 3  |
| 26 | 2576.3 | 1288.7 | 2559.3 | 2558.3 | S  | 234.2  |        | 217.1  | 216.1  | 2  |
| 27 | 2722.4 | 1361.7 | 2705.4 | 2704.4 | K  | 147.1  |        | 130.1  |        | 1  |

Gene symbol: Mapre1

Protein name: Microtubule-associated protein RP/EB family member 1

Protein accession numbers: IPI00117896

Peptide sequence: (R)NIELICQENEGENDPVLQR(I)

Exclusive (unique to this protein): TRUE

SEQUEST XCorr score: 2.94 SEQUEST DCn score: 0.71

Fix modifications: C6: Carbamidomethyl (+57.02) Variable modifications: None

charge: 2

Observed m/z: 1135.5449

Actual minus calculated peptide mass (AMU): 0.009522

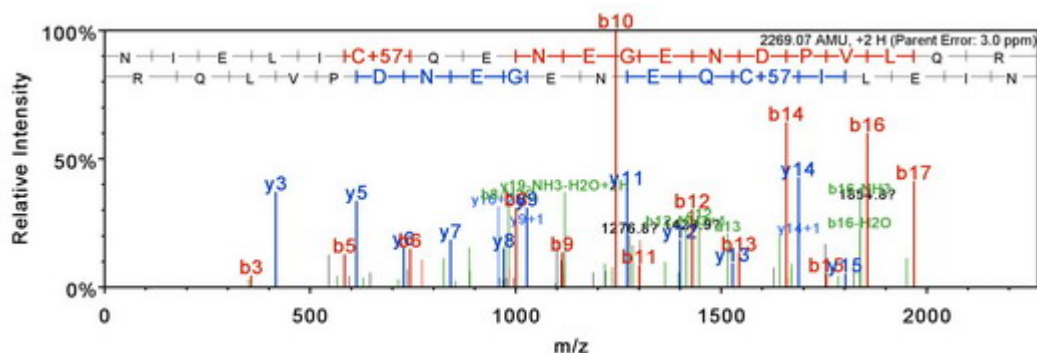

| B  | B ions | B+2H   | B-NH3  | B-H2O  | AA   | Y ions | Y+2H   | Y-NH3  | Y-H2O  | Y  |
|----|--------|--------|--------|--------|------|--------|--------|--------|--------|----|
| 1  | 115.1  |        | 98.0   |        | N    | 2270.1 | 1135.5 | 2253.1 | 2252.1 | 19 |
| 2  | 228.1  |        | 211.1  |        | I    | 2156.0 | 1078.5 | 2139.0 | 2138.0 | 18 |
| 3  | 357.2  |        | 340.2  | 339.2  | E    | 2043.0 | 1022.0 | 2025.9 | 2024.9 | 17 |
| 4  | 470.3  |        | 453.2  | 452.3  | L    | 1913.9 | 957.5  | 1896.9 | 1895.9 | 16 |
| 5  | 583.4  |        | 566.3  | 565.3  | I    | 1800.8 | 900.9  | 1783.8 | 1782.8 | 15 |
| 6  | 743.4  | 372.2  | 726.4  | 725.4  | C+57 | 1687.7 | 844.4  | 1670.7 | 1669.7 | 14 |
| 7  | 871.4  | 436.2  | 854.4  | 853.4  | Q    | 1527.7 | 764.4  | 1510.7 | 1509.7 | 13 |
| 8  | 1000.5 | 500.7  | 983.5  | 982.5  | E    | 1399.7 | 700.3  | 1382.6 | 1381.6 | 12 |
| 9  | 1114.5 | 557.8  | 1097.5 | 1096.5 | N    | 1270.6 | 635.8  | 1253.6 | 1252.6 | 11 |
| 10 | 1243.6 | 622.3  | 1226.5 | 1225.5 | E    | 1156.6 | 578.8  | 1139.5 | 1138.5 | 10 |
| 11 | 1300.6 | 650.8  | 1283.6 | 1282.6 | G    | 1027.5 | 514.3  | 1010.5 | 1009.5 | 9  |
| 12 | 1429.6 | 715.3  | 1412.6 | 1411.6 | E    | 970.5  | 485.8  | 953.5  | 952.5  | 8  |
| 13 | 1543.7 | 772.3  | 1526.6 | 1525.7 | N    | 841.5  | 421.2  | 824.4  | 823.4  | 7  |
| 14 | 1658.7 | 829.9  | 1641.7 | 1640.7 | D    | 727.4  | 364.2  | 710.4  | 709.4  | 6  |
| 15 | 1755.8 | 878.4  | 1738.7 | 1737.7 | P    | 612.4  |        | 595.4  |        | 5  |
| 16 | 1854.8 | 927.9  | 1837.8 | 1836.8 | V    | 515.3  |        | 498.3  |        | 4  |
| 17 | 1967.9 | 984.5  | 1950.9 | 1949.9 | L    | 416.3  |        | 399.2  |        | 3  |
| 18 | 2096.0 | 1048.5 | 2078.9 | 2077.9 | Q    | 303.2  |        | 286.2  |        | 2  |
| 19 | 2270.1 | 1135.5 | 2253.1 | 2252.1 | R    | 175.1  |        | 158.1  |        | 1  |

Gene symbol: Mapre2

Protein name: Isoform 1 of Microtubule-associated protein RP/EB family member 2

Protein accession numbers: IPI00403682,IPI00474073

Peptide sequence: (R)EIELLCQEHGQENDDLVQR(L)

Exclusive (unique to this protein): TRUE

SEQUEST XCorr score: 2.27 SEQUEST DCn score: 0.632

Fix modifications: C6: Carbamidomethyl (+57.02)Variable modifications: None

charge: 2

Observed m/z: 1163.0397

Actual minus calculated peptide mass (AMU): -0.006836

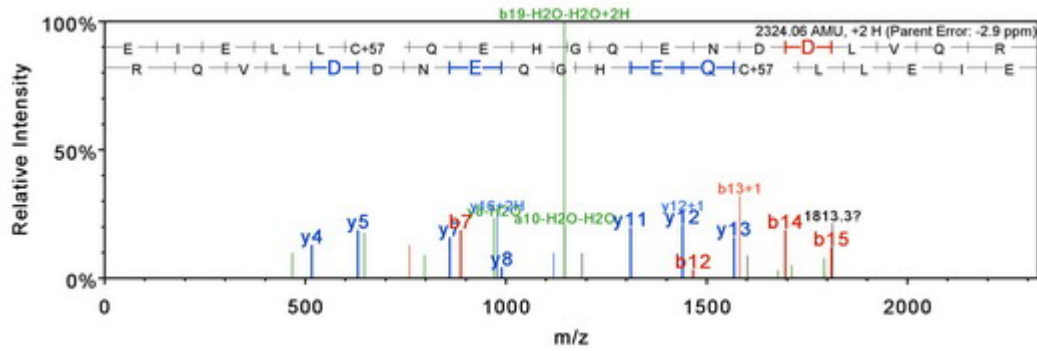

| B  | B Ions | B+2H   | B-NH3  | B-H2O  | AA   | Y Ions | Y+2H   | Y-NH3  | Y-H2O  | Y  |
|----|--------|--------|--------|--------|------|--------|--------|--------|--------|----|
| 1  | 130.1  |        |        | 112.0  | E    | 2325.1 | 1163.0 | 2308.1 | 2307.1 | 19 |
| 2  | 243.1  |        |        | 225.1  | I    | 2196.0 | 1098.5 | 2179.0 | 2178.0 | 18 |
| 3  | 372.2  |        |        | 354.2  | E    | 2082.9 | 1042.0 | 2065.9 | 2064.9 | 17 |
| 4  | 485.3  |        |        | 467.3  | L    | 1953.9 | 977.5  | 1936.9 | 1935.9 | 16 |
| 5  | 598.4  |        |        | 580.3  | L    | 1840.8 | 920.9  | 1823.8 | 1822.8 | 15 |
| 6  | 758.4  | 379.7  |        | 740.4  | C+57 | 1727.7 | 864.4  | 1710.7 | 1709.7 | 14 |
| 7  | 886.4  | 443.7  | 869.4  | 868.4  | Q    | 1567.7 | 784.4  | 1550.7 | 1549.7 | 13 |
| 8  | 1015.5 | 508.2  | 998.5  | 997.5  | E    | 1439.7 | 720.3  | 1422.6 | 1421.6 | 12 |
| 9  | 1152.5 | 576.8  | 1135.5 | 1134.5 | H    | 1310.6 | 655.8  | 1293.6 | 1292.6 | 11 |
| 10 | 1209.6 | 605.3  | 1192.5 | 1191.5 | G    | 1173.5 | 587.3  | 1156.5 | 1155.5 | 10 |
| 11 | 1337.6 | 669.3  | 1320.6 | 1319.6 | Q    | 1116.5 | 558.8  | 1099.5 | 1098.5 | 9  |
| 12 | 1466.7 | 733.8  | 1449.6 | 1448.7 | E    | 988.5  | 494.7  | 971.4  | 970.5  | 8  |
| 13 | 1580.7 | 790.9  | 1563.7 | 1562.7 | N    | 859.4  | 430.2  | 842.4  | 841.4  | 7  |
| 14 | 1695.7 | 848.4  | 1678.7 | 1677.7 | D    | 745.4  | 373.2  | 728.4  | 727.4  | 6  |
| 15 | 1810.8 | 905.9  | 1793.7 | 1792.7 | D    | 630.4  |        | 613.3  | 612.4  | 5  |
| 16 | 1923.8 | 962.4  | 1906.8 | 1905.8 | L    | 515.3  |        | 498.3  |        | 4  |
| 17 | 2022.9 | 1012.0 | 2005.9 | 2004.9 | V    | 402.3  |        | 385.2  |        | 3  |
| 18 | 2151.0 | 1076.0 | 2133.9 | 2133.0 | Q    | 303.2  |        | 286.2  |        | 2  |
| 19 | 2325.1 | 1163.0 | 2308.1 | 2307.1 | R    | 175.1  |        | 158.1  |        | 1  |

Gene symbol: Mif

Protein name: Macrophage migration inhibitory factor

Protein accession numbers: IPI00230427

Peptide sequence: (R)ASVPEGFLSELTQQLAQATGK(P)

Exclusive (unique to this protein): TRUE

SEQUEST XCorr score: 3.17 SEQUEST DCn score: 0.556

Fix modifications: None

Variable modifications: None

charge: 2

Observed m/z: 1088.0715

Actual minus calculated peptide mass (AMU): 0.005371



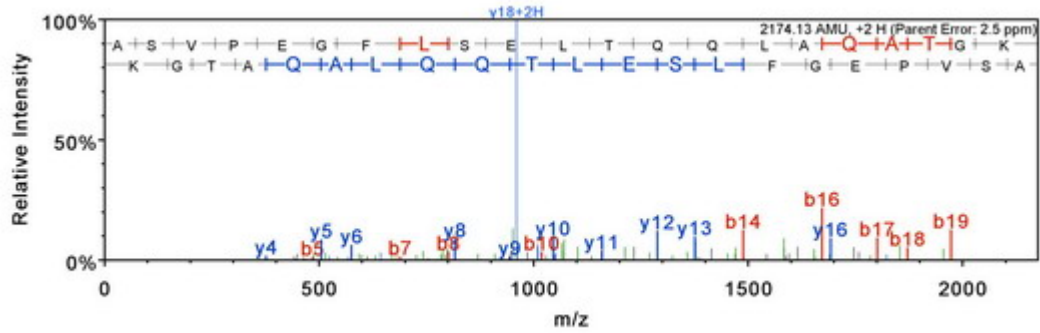

| B  | B Ions | B+2H   | B-NH3  | B-H2O  | AA | Y Ions | Y+2H   | Y-NH3  | Y-H2O  | Y  |
|----|--------|--------|--------|--------|----|--------|--------|--------|--------|----|
| 1  | 72.0   |        |        |        | A  | 2175.1 | 1088.1 | 2158.1 | 2157.1 | 21 |
| 2  | 159.1  |        |        | 141.1  | S  | 2104.1 | 1052.5 | 2087.1 | 2086.1 | 20 |
| 3  | 258.1  |        |        | 240.1  | V  | 2017.1 | 1009.0 | 2000.0 | 1999.1 | 19 |
| 4  | 355.2  |        |        | 337.2  | P  | 1918.0 | 959.5  | 1901.0 | 1900.0 | 18 |
| 5  | 484.2  |        |        | 466.2  | E  | 1820.9 | 911.0  | 1803.9 | 1802.9 | 17 |
| 6  | 541.3  | 271.1  |        | 523.3  | G  | 1691.9 | 846.5  | 1674.9 | 1673.9 | 16 |
| 7  | 688.3  | 344.7  |        | 670.3  | F  | 1634.9 | 817.9  | 1617.9 | 1616.9 | 15 |
| 8  | 801.4  | 401.2  |        | 783.4  | L  | 1487.8 | 744.4  | 1470.8 | 1469.8 | 14 |
| 9  | 888.5  | 444.7  |        | 870.4  | S  | 1374.7 | 687.9  | 1357.7 | 1356.7 | 13 |
| 10 | 1017.5 | 509.3  |        | 999.5  | E  | 1287.7 | 644.4  | 1270.7 | 1269.7 | 12 |
| 11 | 1130.6 | 565.8  |        | 1112.6 | L  | 1158.7 | 579.8  | 1141.6 | 1140.6 | 11 |
| 12 | 1231.6 | 616.3  |        | 1213.6 | T  | 1045.6 | 523.3  | 1028.5 | 1027.5 | 10 |
| 13 | 1359.7 | 680.3  | 1342.7 | 1341.7 | Q  | 944.5  | 472.8  | 927.5  | 926.5  | 9  |
| 14 | 1487.7 | 744.4  | 1470.7 | 1469.7 | Q  | 816.5  | 408.7  | 799.4  | 798.5  | 8  |
| 15 | 1600.8 | 800.9  | 1583.8 | 1582.8 | L  | 688.4  | 344.7  | 671.4  | 670.4  | 7  |
| 16 | 1671.9 | 836.4  | 1654.8 | 1653.9 | A  | 575.3  | 288.2  | 558.3  | 557.3  | 6  |
| 17 | 1799.9 | 900.5  | 1782.9 | 1781.9 | Q  | 504.3  |        | 487.3  | 486.3  | 5  |
| 18 | 1871.0 | 936.0  | 1853.9 | 1852.9 | A  | 376.2  |        | 359.2  | 358.2  | 4  |
| 19 | 1972.0 | 986.5  | 1955.0 | 1954.0 | T  | 305.2  |        | 288.2  | 287.2  | 3  |
| 20 | 2029.0 | 1015.0 | 2012.0 | 2011.0 | G  | 204.1  |        | 187.1  |        | 2  |
| 21 | 2175.1 | 1088.1 | 2158.1 | 2157.1 | K  | 147.1  |        | 130.1  |        | 1  |

Gene symbol: Mllt4

Protein name: myeloid/lymphoid or mixed lineage-leukemia translocation to 4 homolog isoform 1

Protein accession numbers: IPI00137836,IPI00660193,IPI00753111,IPI00845596

Peptide sequence: (R)TQDATGPELILPASIEFR(E)

Exclusive (unique to this protein): TRUE

SEQUEST XCorr score: 2.21 SEQUEST DCn score: 0.301

Fix modifications: None

Variable modifications: None

charge: 2

Observed m/z: 979.5111

Actual minus calculated peptide mass (AMU): -0.009522

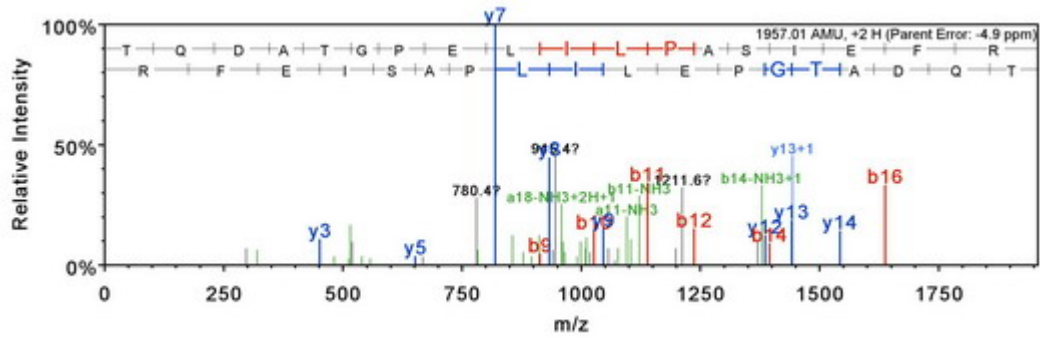

| B  | B ions | B+2H  | B-NH3  | B-H2O  | AA | Y ions | Y+2H  | Y-NH3  | Y-H2O  | Y  |
|----|--------|-------|--------|--------|----|--------|-------|--------|--------|----|
| 1  | 102.1  |       |        | 84.0   | T  | 1958.0 | 979.5 | 1941.0 | 1940.0 | 18 |
| 2  | 230.1  |       | 213.1  | 212.1  | Q  | 1857.0 | 929.0 | 1840.0 | 1839.0 | 17 |
| 3  | 345.1  |       | 328.1  | 327.1  | D  | 1728.9 | 865.0 | 1711.9 | 1710.9 | 16 |
| 4  | 416.2  |       | 399.2  | 398.2  | A  | 1613.9 | 807.5 | 1596.9 | 1595.9 | 15 |
| 5  | 517.2  |       | 500.2  | 499.2  | T  | 1542.9 | 771.9 | 1525.8 | 1524.8 | 14 |
| 6  | 574.3  | 287.6 | 557.2  | 556.2  | G  | 1441.8 | 721.4 | 1424.8 | 1423.8 | 13 |
| 7  | 671.3  | 336.2 | 654.3  | 653.3  | P  | 1384.8 | 692.9 | 1367.8 | 1366.8 | 12 |
| 8  | 800.3  | 400.7 | 783.3  | 782.3  | E  | 1287.7 | 644.4 | 1270.7 | 1269.7 | 11 |
| 9  | 913.4  | 457.2 | 896.4  | 895.4  | L  | 1158.7 | 579.9 | 1141.7 | 1140.7 | 10 |
| 10 | 1026.5 | 513.8 | 1009.5 | 1008.5 | I  | 1045.6 | 523.3 | 1028.6 | 1027.6 | 9  |
| 11 | 1139.6 | 570.3 | 1122.6 | 1121.6 | L  | 932.5  | 466.8 | 915.5  | 914.5  | 8  |
| 12 | 1236.7 | 618.8 | 1219.6 | 1218.6 | P  | 819.4  | 410.2 | 802.4  | 801.4  | 7  |
| 13 | 1307.7 | 654.4 | 1290.7 | 1289.7 | A  | 722.4  | 361.7 | 705.4  | 704.4  | 6  |
| 14 | 1394.7 | 697.9 | 1377.7 | 1376.7 | S  | 651.4  |       | 634.3  | 633.3  | 5  |
| 15 | 1507.8 | 754.4 | 1490.8 | 1489.8 | I  | 564.3  |       | 547.3  | 546.3  | 4  |
| 16 | 1636.8 | 818.9 | 1619.8 | 1618.8 | E  | 451.2  |       | 434.2  | 433.2  | 3  |
| 17 | 1783.9 | 892.5 | 1766.9 | 1765.9 | F  | 322.2  |       | 305.2  |        | 2  |
| 18 | 1958.0 | 979.5 | 1941.0 | 1940.0 | R  | 175.1  |       | 158.1  |        | 1  |

Gene symbol: Mtap

Protein name: S-methyl-5-thioadenosine phosphorylase

Protein accession numbers: IPI00132096

Peptide sequence: (K)IGIIGGTGLDDPEILEGR(T)

Exclusive (unique to this protein): TRUE

SEQUEST XCorr score: 2.45 SEQUEST DCn score: 0.662

Fix modifications: None

Variable modifications: None

charge: 2

Observed m/z: 912.9919

Actual minus calculated peptide mass (AMU): 0.004761

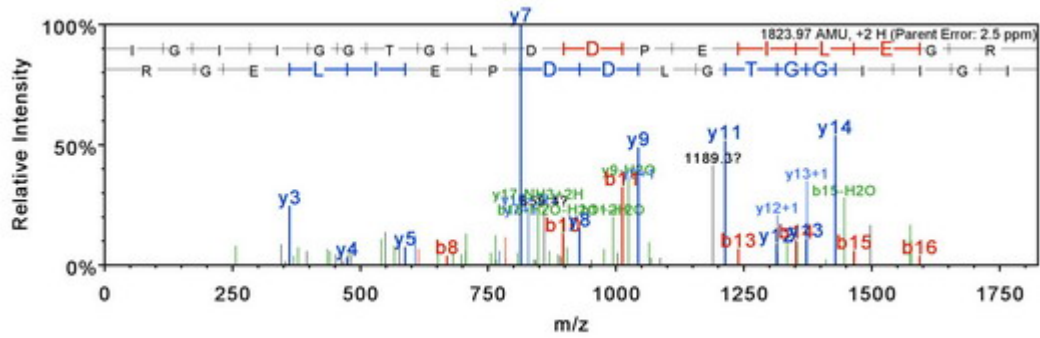

| B  | B ions | B+2H  | B-NH3  | B-H2O  | AA | Y ions | Y+2H  | Y-NH3  | Y-H2O  | Y  |
|----|--------|-------|--------|--------|----|--------|-------|--------|--------|----|
| 1  | 114.1  |       |        |        | I  | 1825.0 | 913.0 | 1807.9 | 1807.0 | 18 |
| 2  | 171.1  |       |        |        | G  | 1711.9 | 856.5 | 1694.9 | 1693.9 | 17 |
| 3  | 284.2  |       |        |        | I  | 1654.9 | 827.9 | 1637.8 | 1636.9 | 16 |
| 4  | 397.3  |       |        |        | I  | 1541.8 | 771.4 | 1524.8 | 1523.8 | 15 |
| 5  | 454.3  |       |        |        | G  | 1428.7 | 714.9 | 1411.7 | 1410.7 | 14 |
| 6  | 511.3  | 256.2 |        |        | G  | 1371.7 | 686.3 | 1354.7 | 1353.7 | 13 |
| 7  | 612.4  | 306.7 |        | 594.4  | T  | 1314.7 | 657.8 | 1297.6 | 1296.6 | 12 |
| 8  | 669.4  | 335.2 |        | 651.4  | G  | 1213.6 | 607.3 | 1196.6 | 1195.6 | 11 |
| 9  | 782.5  | 391.7 |        | 764.5  | L  | 1156.6 | 578.8 | 1139.6 | 1138.6 | 10 |
| 10 | 897.5  | 449.3 |        | 879.5  | D  | 1043.5 | 522.3 | 1026.5 | 1025.5 | 9  |
| 11 | 1012.5 | 506.8 |        | 994.5  | D  | 928.5  | 464.7 | 911.5  | 910.5  | 8  |
| 12 | 1109.6 | 555.3 |        | 1091.6 | P  | 813.5  | 407.2 | 796.4  | 795.4  | 7  |
| 13 | 1238.6 | 619.8 |        | 1220.6 | E  | 716.4  | 358.7 | 699.4  | 698.4  | 6  |
| 14 | 1351.7 | 676.4 |        | 1333.7 | I  | 587.4  |       | 570.3  | 569.3  | 5  |
| 15 | 1464.8 | 732.9 |        | 1446.8 | L  | 474.3  |       | 457.2  | 456.3  | 4  |
| 16 | 1593.8 | 797.4 |        | 1575.8 | E  | 361.2  |       | 344.2  | 343.2  | 3  |
| 17 | 1650.9 | 825.9 |        | 1632.9 | G  | 232.1  |       | 215.1  |        | 2  |
| 18 | 1825.0 | 913.0 | 1807.9 | 1807.0 | R  | 175.1  |       | 158.1  |        | 1  |

Gene symbol: Mtmr14

Protein name: Myotubularin-related protein 14 precursor

Protein accession numbers: IPI00396726

Peptide sequence: (R)FVCPVILFK(G)

Exclusive (unique to this protein): TRUE

SEQUEST XCorr score: 2 SEQUEST DCn score: 0.472

Fix modifications: C3: Carbamidomethyl (+57.02) Variable modifications: None

charge: 2

Observed m/z: 561.8202

Actual minus calculated peptide mass (AMU): -0.006226

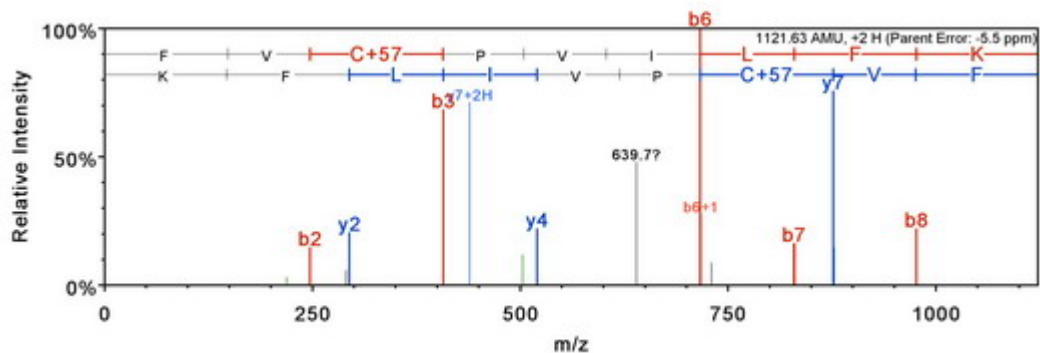

| B | B ions | B+2H  | B-NH3  | B-H2O | AA   | Y ions | Y+2H  | Y-NH3  | Y-H2O | Y |
|---|--------|-------|--------|-------|------|--------|-------|--------|-------|---|
| 1 | 148.1  |       |        |       | F    | 1122.6 | 561.8 | 1105.6 |       | 9 |
| 2 | 247.1  |       |        |       | V    | 975.6  | 488.3 | 958.5  |       | 8 |
| 3 | 407.2  |       |        |       | C+57 | 876.5  | 438.8 | 859.5  |       | 7 |
| 4 | 504.2  |       |        |       | P    | 716.5  | 358.7 | 699.4  |       | 6 |
| 5 | 603.3  |       |        |       | V    | 619.4  |       | 602.4  |       | 5 |
| 6 | 716.4  | 358.7 |        |       | I    | 520.4  |       | 503.3  |       | 4 |
| 7 | 829.5  | 415.2 |        |       | L    | 407.3  |       | 390.2  |       | 3 |
| 8 | 976.5  | 488.8 |        |       | F    | 294.2  |       | 277.2  |       | 2 |
| 9 | 1122.6 | 561.8 | 1105.6 |       | K    | 147.1  |       | 130.1  |       | 1 |

Gene symbol: Nans

Protein name: N-acetylneuraminic acid synthase

Protein accession numbers: IPI00114925

Peptide sequence: (K)GSDHSASLEPGELAEI(L)S+H

Exclusive (unique to this protein): TRUE

SEQUEST XCorr score: 2.44 SEQUEST DCn score: 0.627

Fix modifications: None

Variable modifications: None

charge: 2

Observed m/z: 933.9626

Actual minus calculated peptide mass (AMU): -0.002564

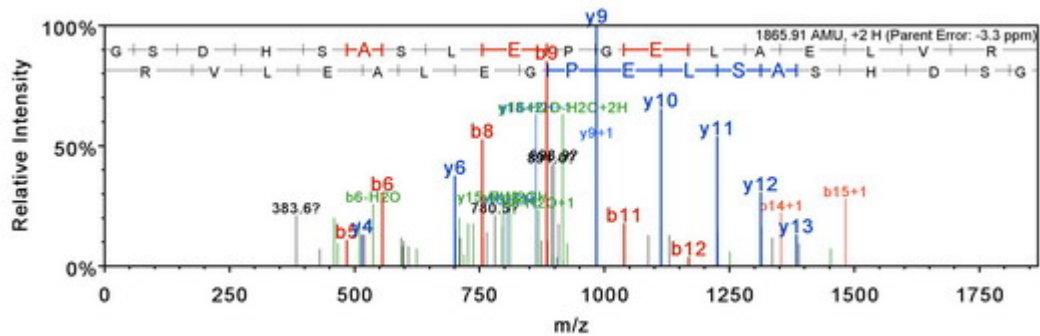

| B  | B ions | B+2H  | B-NH3  | B-H2O  | AA | Y ions | Y+2H  | Y-NH3  | Y-H2O  | Y  |
|----|--------|-------|--------|--------|----|--------|-------|--------|--------|----|
| 1  | 58.0   |       |        |        | G  | 1866.9 | 934.0 | 1849.9 | 1848.9 | 18 |
| 2  | 145.1  |       |        | 127.1  | S  | 1809.9 | 905.5 | 1792.9 | 1791.9 | 17 |
| 3  | 260.1  |       |        | 242.1  | D  | 1722.9 | 861.9 | 1705.8 | 1704.9 | 16 |
| 4  | 397.2  | 199.1 |        | 379.1  | H  | 1607.8 | 804.4 | 1590.8 | 1589.8 | 15 |
| 5  | 484.2  | 242.6 |        | 466.2  | S  | 1470.8 | 735.9 | 1453.8 | 1452.8 | 14 |
| 6  | 555.2  | 278.1 |        | 537.2  | A  | 1383.8 | 692.4 | 1366.7 | 1365.7 | 13 |
| 7  | 642.3  | 321.6 |        | 624.2  | S  | 1312.7 | 656.9 | 1295.7 | 1294.7 | 12 |
| 8  | 755.3  | 378.2 |        | 737.3  | L  | 1225.7 | 613.3 | 1208.7 | 1207.7 | 11 |
| 9  | 884.4  | 442.7 |        | 866.4  | E  | 1112.6 | 556.8 | 1095.6 | 1094.6 | 10 |
| 10 | 981.4  | 491.2 |        | 963.4  | P  | 983.6  | 492.3 | 966.5  | 965.5  | 9  |
| 11 | 1038.5 | 519.7 |        | 1020.4 | G  | 886.5  | 443.8 | 869.5  | 868.5  | 8  |
| 12 | 1167.5 | 584.3 |        | 1149.5 | E  | 829.5  | 415.2 | 812.5  | 811.5  | 7  |
| 13 | 1280.6 | 640.8 |        | 1262.6 | L  | 700.4  | 350.7 | 683.4  | 682.4  | 6  |
| 14 | 1351.6 | 676.3 |        | 1333.6 | A  | 587.4  |       | 570.3  | 569.3  | 5  |
| 15 | 1480.7 | 740.8 |        | 1462.7 | E  | 516.3  |       | 499.3  | 498.3  | 4  |
| 16 | 1593.7 | 797.4 |        | 1575.7 | L  | 387.3  |       | 370.3  |        | 3  |
| 17 | 1692.8 | 846.9 |        | 1674.8 | V  | 274.2  |       | 257.2  |        | 2  |
| 18 | 1866.9 | 934.0 | 1849.9 | 1848.9 | R  | 175.1  |       | 158.1  |        | 1  |

Gene symbol: Nat14

Protein name: Adult male olfactory brain cDNA, RIKEN full-length enriched library, clone:6430557O09 product:LEUCINE-ZIPPER-LIKE PROTEIN 1 homolog

Protein accession numbers: IPI00225865

Peptide sequence: (R)GSGDVCGLALAPGANVGDGAR(V)

Exclusive (unique to this protein): TRUE

SEQUEST XCorr score: 2.6 SEQUEST DCn score: 0.672

Fix modifications: C6: Carbamidomethyl (+57.02) Variable modifications: None

charge: 2

Observed m/z: 1006.9979

Actual minus calculated peptide mass (AMU): 0.005371

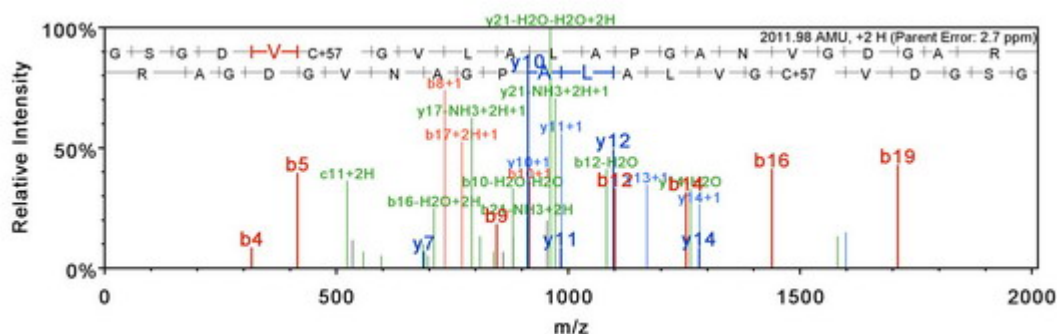

| B  | B ions | B+2H   | B-NH3  | B-H2O  | AA   | Y ions | Y+2H   | Y-NH3  | Y-H2O  | Y  |
|----|--------|--------|--------|--------|------|--------|--------|--------|--------|----|
| 1  | 58.0   |        |        |        | G    | 2013.0 | 1007.0 | 1996.0 | 1995.0 | 22 |
| 2  | 145.1  |        |        | 127.1  | S    | 1956.0 | 978.5  | 1938.9 | 1938.0 | 21 |
| 3  | 202.1  |        |        | 184.1  | G    | 1868.9 | 935.0  | 1851.9 | 1850.9 | 20 |
| 4  | 317.1  |        |        | 299.1  | D    | 1811.9 | 906.5  | 1794.9 | 1793.9 | 19 |
| 5  | 416.2  |        |        | 398.2  | V    | 1696.9 | 848.9  | 1679.9 | 1678.9 | 18 |
| 6  | 576.2  | 288.6  |        | 558.2  | C+57 | 1597.8 | 799.4  | 1580.8 | 1579.8 | 17 |
| 7  | 633.2  | 317.1  |        | 615.2  | G    | 1437.8 | 719.4  | 1420.8 | 1419.8 | 16 |
| 8  | 732.3  | 366.7  |        | 714.3  | V    | 1380.8 | 690.9  | 1363.7 | 1362.8 | 15 |
| 9  | 845.4  | 423.2  |        | 827.4  | L    | 1281.7 | 641.4  | 1264.7 | 1263.7 | 14 |
| 10 | 916.4  | 458.7  |        | 898.4  | A    | 1168.6 | 584.8  | 1151.6 | 1150.6 | 13 |
| 11 | 1029.5 | 515.3  |        | 1011.5 | L    | 1097.6 | 549.3  | 1080.5 | 1079.6 | 12 |
| 12 | 1100.5 | 550.8  |        | 1082.5 | A    | 984.5  | 492.8  | 967.5  | 966.5  | 11 |
| 13 | 1197.6 | 599.3  |        | 1179.6 | P    | 913.5  | 457.2  | 896.4  | 895.4  | 10 |
| 14 | 1254.6 | 627.8  |        | 1236.6 | G    | 816.4  | 408.7  | 799.4  | 798.4  | 9  |
| 15 | 1325.7 | 663.3  |        | 1307.6 | A    | 759.4  | 380.2  | 742.4  | 741.4  | 8  |
| 16 | 1439.7 | 720.4  | 1422.7 | 1421.7 | N    | 688.3  | 344.7  | 671.3  | 670.3  | 7  |
| 17 | 1538.8 | 769.9  | 1521.7 | 1520.8 | V    | 574.3  | 287.7  | 557.3  | 556.3  | 6  |
| 18 | 1595.8 | 798.4  | 1578.8 | 1577.8 | G    | 475.2  |        | 458.2  | 457.2  | 5  |
| 19 | 1710.8 | 855.9  | 1693.8 | 1692.8 | D    | 418.2  |        | 401.2  | 400.2  | 4  |
| 20 | 1767.8 | 884.4  | 1750.8 | 1749.8 | G    | 303.2  |        | 286.2  |        | 3  |
| 21 | 1838.9 | 919.9  | 1821.8 | 1820.9 | A    | 246.2  |        | 229.1  |        | 2  |
| 22 | 2013.0 | 1007.0 | 1996.0 | 1995.0 | R    | 175.1  |        | 158.1  |        | 1  |

Gene symbol: Nbeal2

Protein name: mKIAA0540 protein

Protein accession numbers: IPI00421222,IPI00675407

Peptide sequence: (K)SSEDRMERNVAFAFLMLR(N)

Exclusive (unique to this protein): TRUE

SEQUEST XCorr score: 2.5 SEQUEST DCn score: 0.328

Fix modifications: None

Variable modifications: M17: Oxidation (+16.00)

charge: 3 Observed m/z: 742.3746

Actual minus calculated peptide mass (AMU): -0.008789

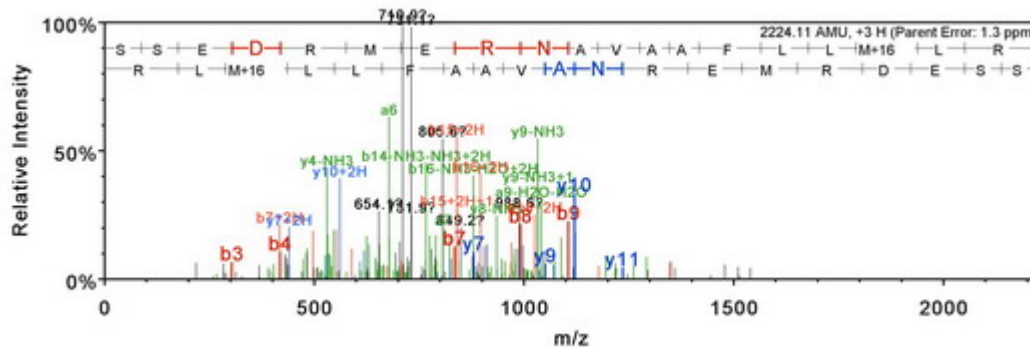

| B  | B Ions | B+2H   | B-NH3  | B-H2O  | AA   | Y Ions | Y+2H   | Y-NH3  | Y-H2O  | Y  |
|----|--------|--------|--------|--------|------|--------|--------|--------|--------|----|
| 1  | 88.0   |        |        | 70.0   | S    | 2225.1 | 1113.1 | 2208.1 | 2207.1 | 19 |
| 2  | 175.1  |        |        | 157.1  | S    | 2138.1 | 1069.5 | 2121.1 | 2120.1 | 18 |
| 3  | 304.1  |        |        | 286.1  | E    | 2051.1 | 1026.0 | 2034.0 | 2033.0 | 17 |
| 4  | 419.1  |        |        | 401.1  | D    | 1922.0 | 961.5  | 1905.0 | 1904.0 | 16 |
| 5  | 575.2  | 288.1  | 558.2  | 557.2  | R    | 1807.0 | 904.0  | 1790.0 | 1789.0 | 15 |
| 6  | 706.3  | 353.7  | 689.3  | 688.3  | M    | 1650.9 | 826.0  | 1633.9 | 1632.9 | 14 |
| 7  | 835.3  | 418.2  | 818.3  | 817.3  | E    | 1519.8 | 760.4  | 1502.8 | 1501.8 | 13 |
| 8  | 991.4  | 496.2  | 974.4  | 973.4  | R    | 1390.8 | 695.9  | 1373.8 |        | 12 |
| 9  | 1105.5 | 553.2  | 1088.4 | 1087.5 | N    | 1234.7 | 617.9  | 1217.7 |        | 11 |
| 10 | 1176.5 | 588.8  | 1159.5 | 1158.5 | A    | 1120.7 | 560.8  | 1103.6 |        | 10 |
| 11 | 1275.6 | 638.3  | 1258.5 | 1257.6 | V    | 1049.6 | 525.3  | 1032.6 |        | 9  |
| 12 | 1346.6 | 673.8  | 1329.6 | 1328.6 | A    | 950.6  | 475.8  | 933.5  |        | 8  |
| 13 | 1417.7 | 709.3  | 1400.6 | 1399.6 | A    | 879.5  | 440.3  | 862.5  |        | 7  |
| 14 | 1564.7 | 782.9  | 1547.7 | 1546.7 | F    | 808.5  | 404.7  | 791.5  |        | 6  |
| 15 | 1677.8 | 839.4  | 1660.8 | 1659.8 | L    | 661.4  |        | 644.4  |        | 5  |
| 16 | 1790.9 | 896.0  | 1773.9 | 1772.9 | L    | 548.3  |        | 531.3  |        | 4  |
| 17 | 1937.9 | 969.5  | 1920.9 | 1919.9 | M+16 | 435.2  |        | 418.2  |        | 3  |
| 18 | 2051.0 | 1026.0 | 2034.0 | 2033.0 | L    | 288.2  |        | 271.2  |        | 2  |
| 19 | 2225.1 | 1113.1 | 2208.1 | 2207.1 | R    | 175.1  |        | 158.1  |        | 1  |

Gene symbol: Ndufc2

Protein name: Adult male small intestine cDNA, RIKEN full-length enriched library, clone:2010300P09 product:1810004I06RIK PROTEIN (SIMILAR TO NADH DEHYDROGENASE (UBIQUINONE) 1, SUBCOMPLEX UNKNOWN, 2) (14.5KD, B14.5B) homolog

Protein accession numbers: IPI00110825

Peptide sequence: (K)TYAEILEPFHPVR

Exclusive (unique to this protein): TRUE

SEQUEST XCorr score: 2.08 SEQUEST DCn score: 0.573

Fix modifications: None

Variable modifications: None

charge: 2

Observed m/z: 786.411

Actual minus calculated peptide mass (AMU): -0.008057

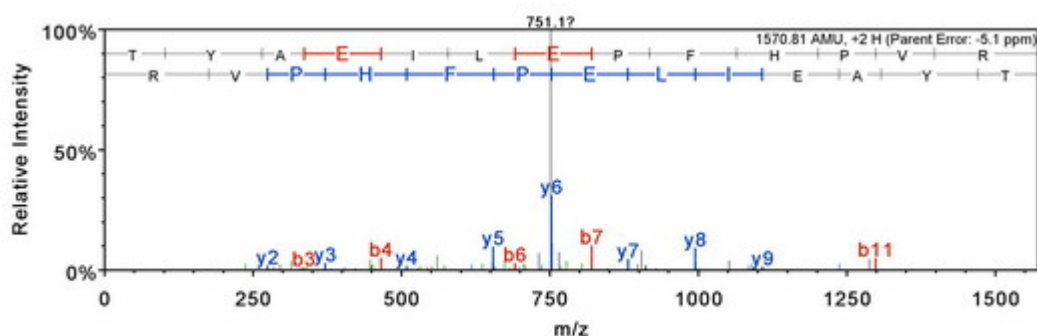

| B  | B ions | B+2H  | B-NH3  | B-H2O  | AA | Y ions | Y+2H  | Y-NH3  | Y-H2O  | Y  |
|----|--------|-------|--------|--------|----|--------|-------|--------|--------|----|
| 1  | 102.1  |       |        | 84.0   | T  | 1571.8 | 786.4 | 1554.8 | 1553.8 | 13 |
| 2  | 265.1  |       |        | 247.1  | Y  | 1470.8 | 735.9 | 1453.8 | 1452.8 | 12 |
| 3  | 336.2  |       |        | 318.2  | A  | 1307.7 | 654.4 | 1290.7 | 1289.7 | 11 |
| 4  | 465.2  |       |        | 447.2  | E  | 1236.7 | 618.8 | 1219.7 | 1218.7 | 10 |
| 5  | 578.3  |       |        | 560.3  | I  | 1107.6 | 554.3 | 1090.6 | 1089.6 | 9  |
| 6  | 691.4  | 346.2 |        | 673.4  | L  | 994.6  | 497.8 | 977.5  | 976.5  | 8  |
| 7  | 820.4  | 410.7 |        | 802.4  | E  | 881.5  | 441.2 | 864.4  | 863.5  | 7  |
| 8  | 917.5  | 459.2 |        | 899.5  | P  | 752.4  | 376.7 | 735.4  |        | 6  |
| 9  | 1064.5 | 532.8 |        | 1046.5 | F  | 655.4  | 328.2 | 638.3  |        | 5  |
| 10 | 1201.6 | 601.3 |        | 1183.6 | H  | 508.3  | 254.7 | 491.3  |        | 4  |
| 11 | 1298.6 | 649.8 |        | 1280.6 | P  | 371.2  |       | 354.2  |        | 3  |
| 12 | 1397.7 | 699.4 |        | 1379.7 | V  | 274.2  |       | 257.2  |        | 2  |
| 13 | 1571.8 | 786.4 | 1554.8 | 1553.8 | R  | 175.1  |       | 158.1  |        | 1  |

Gene symbol: Ndufs5;LOC631712

Protein name: NADH dehydrogenase [ubiquinone] iron-sulfur protein 5

Protein accession numbers: IPI00117300,IPI00649019

Peptide sequence: (K)IEFDDFEECLLR(Y)

Exclusive (unique to this protein): TRUE

SEQUEST XCorr score: 2.26 SEQUEST DCn score: 0.753

Fix modifications: C9: Carbamidomethyl (+57.02)Variable modifications: None

charge: 2

Observed m/z: 793.3607

Actual minus calculated peptide mass (AMU): -0.007568

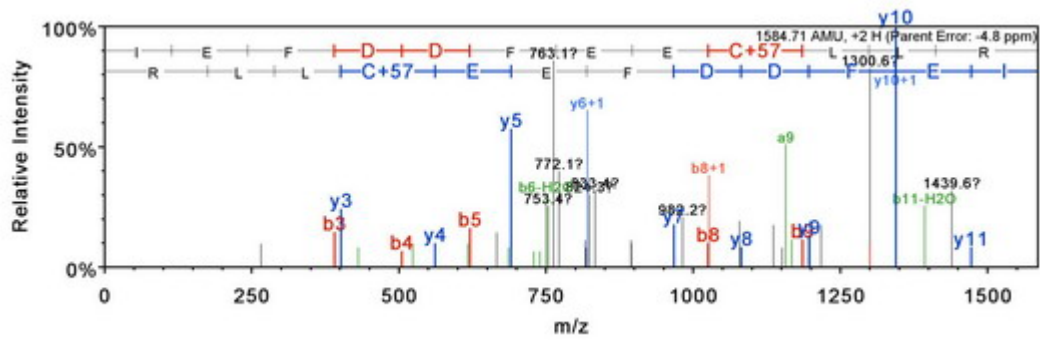

| B  | B Ions | B+2H  | B-NH3  | B-H2O  | A,A  | Y Ions | Y+2H  | Y-NH3  | Y-H2O  | Y  |
|----|--------|-------|--------|--------|------|--------|-------|--------|--------|----|
| 1  | 114.1  |       |        |        | I    | 1585.7 | 793.4 | 1568.7 | 1567.7 | 12 |
| 2  | 243.1  |       |        | 225.1  | E    | 1472.6 | 736.8 | 1455.6 | 1454.6 | 11 |
| 3  | 390.2  |       |        | 372.2  | F    | 1343.6 | 672.3 | 1326.6 | 1325.6 | 10 |
| 4  | 505.2  |       |        | 487.2  | D    | 1196.5 | 598.8 | 1179.5 | 1178.5 | 9  |
| 5  | 620.3  |       |        | 602.3  | D    | 1081.5 | 541.3 | 1064.5 | 1063.5 | 8  |
| 6  | 767.3  | 384.2 |        | 749.3  | F    | 966.5  | 483.7 | 949.5  | 948.5  | 7  |
| 7  | 896.4  | 448.7 |        | 878.4  | E    | 819.4  | 410.2 | 802.4  | 801.4  | 6  |
| 8  | 1025.4 | 513.2 |        | 1007.4 | E    | 690.4  |       | 673.3  | 672.4  | 5  |
| 9  | 1185.4 | 593.2 |        | 1167.4 | C+57 | 561.3  |       | 544.3  |        | 4  |
| 10 | 1298.5 | 649.8 |        | 1280.5 | L    | 401.3  |       | 384.3  |        | 3  |
| 11 | 1411.6 | 706.3 |        | 1393.6 | L    | 288.2  |       | 271.2  |        | 2  |
| 12 | 1585.7 | 793.4 | 1568.7 | 1567.7 | R    | 175.1  |       | 158.1  |        | 1  |

Gene symbol: Nit2

Protein name: Nit protein 2

Protein accession numbers: IPI00119945

Peptide sequence: (R)FAELAQIYAQR(G)

Exclusive (unique to this protein): TRUE

SEQUEST XCorr score: 2.32 SEQUEST DCn score: 0.473

Fix modifications: None

Variable modifications: None

charge: 2

Observed m/z: 655.3482

Actual minus calculated peptide mass (AMU): -0.0019551

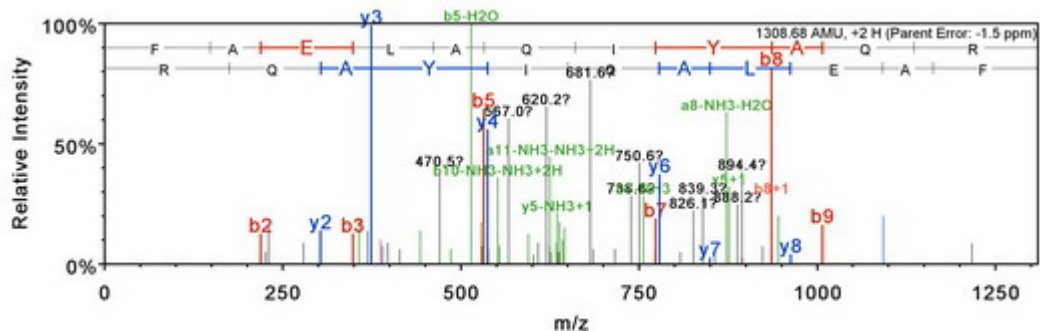



| B  | B Ions | B+2H  | B-NH3  | B-H2O  | AA | Y Ions | Y+2H  | Y-NH3  | Y-H2O  | Y  |
|----|--------|-------|--------|--------|----|--------|-------|--------|--------|----|
| 1  | 148.1  |       |        |        | F  | 1309.7 | 655.4 | 1292.7 | 1291.7 | 11 |
| 2  | 219.1  |       |        |        | A  | 1162.6 | 581.8 | 1145.6 | 1144.6 | 10 |
| 3  | 348.2  |       |        | 330.2  | E  | 1091.6 | 546.3 | 1074.6 | 1073.6 | 9  |
| 4  | 461.2  |       |        | 443.2  | L  | 962.5  | 481.8 | 945.5  |        | 8  |
| 5  | 532.3  |       |        | 514.3  | A  | 849.5  | 425.2 | 832.4  |        | 7  |
| 6  | 660.3  | 330.7 | 643.3  | 642.3  | Q  | 778.4  | 389.7 | 761.4  |        | 6  |
| 7  | 773.4  | 387.2 | 756.4  | 755.4  | I  | 650.4  |       | 633.3  |        | 5  |
| 8  | 936.5  | 468.8 | 919.5  | 918.5  | Y  | 537.3  |       | 520.3  |        | 4  |
| 9  | 1007.5 | 504.3 | 990.5  | 989.5  | A  | 374.2  |       | 357.2  |        | 3  |
| 10 | 1135.6 | 568.3 | 1118.5 | 1117.6 | Q  | 303.2  |       | 286.2  |        | 2  |
| 11 | 1309.7 | 655.4 | 1292.7 | 1291.7 | R  | 175.1  |       | 158.1  |        | 1  |

Gene symbol: Nlrp4b

Protein name: NACHT, LRR and PYD domains-containing protein 4B

Protein accession numbers: IPI00226298

Peptide sequence: (R)NIAQEAFLIR(E)

Exclusive (unique to this protein): TRUE

SEQUEST XCorr score: 2.1 SEQUEST DCn score: 0.663

Fix modifications: None

Variable modifications: None

charge: 2

Observed m/z: 631.3452

Actual minus calculated peptide mass (AMU): -0.007935

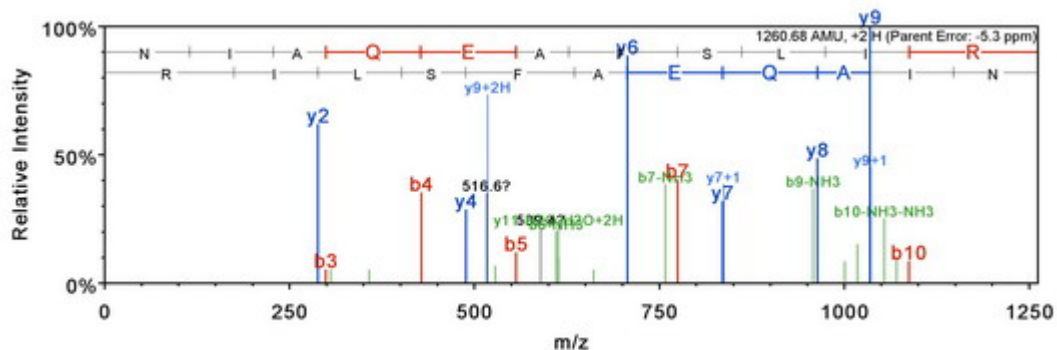

| B  | B Ions | B+2H  | B-NH3  | B-H2O  | AA | Y Ions | Y+2H  | Y-NH3  | Y-H2O  | Y  |
|----|--------|-------|--------|--------|----|--------|-------|--------|--------|----|
| 1  | 115.1  |       | 98.0   |        | N  | 1261.7 | 631.4 | 1244.7 | 1243.7 | 11 |
| 2  | 228.1  |       | 211.1  |        | I  | 1147.7 | 574.3 | 1130.6 | 1129.6 | 10 |
| 3  | 299.2  |       | 282.2  |        | A  | 1034.6 | 517.8 | 1017.5 | 1016.6 | 9  |
| 4  | 427.2  |       | 410.2  |        | Q  | 963.5  | 482.3 | 946.5  | 945.5  | 8  |
| 5  | 556.3  |       | 539.3  | 538.3  | E  | 835.5  | 418.2 | 818.4  | 817.5  | 7  |
| 6  | 627.3  | 314.2 | 610.3  | 609.3  | A  | 706.4  | 353.7 | 689.4  | 688.4  | 6  |
| 7  | 774.4  | 387.7 | 757.4  | 756.4  | F  | 635.4  |       | 618.4  | 617.4  | 5  |
| 8  | 861.4  | 431.2 | 844.4  | 843.4  | S  | 488.3  |       | 471.3  | 470.3  | 4  |
| 9  | 974.5  | 487.8 | 957.5  | 956.5  | L  | 401.3  |       | 384.3  |        | 3  |
| 10 | 1087.6 | 544.3 | 1070.5 | 1069.6 | I  | 288.2  |       | 271.2  |        | 2  |
| 11 | 1261.7 | 631.4 | 1244.7 | 1243.7 | R  | 175.1  |       | 158.1  |        | 1  |

Gene symbol: Nlrp4f

Protein name: ES cells cDNA, RIKEN full-length enriched library, clone:C330026N02  
product:hypothetical Leucine rich repeat, ribonuclease inhibitor type containing protein, full insert  
sequence

Protein accession numbers: IPI00226572

Peptide sequence: (K)TLSHLDISSNDLKDEGLK(I)

Exclusive (unique to this protein): TRUE

SEQUEST XCorr score: 2.03 SEQUEST DCn score: 0.603

Fix modifications: None

Variable modifications: None

charge: 2

Observed m/z: 993.0112

Actual minus calculated peptide mass (AMU): -0.004883

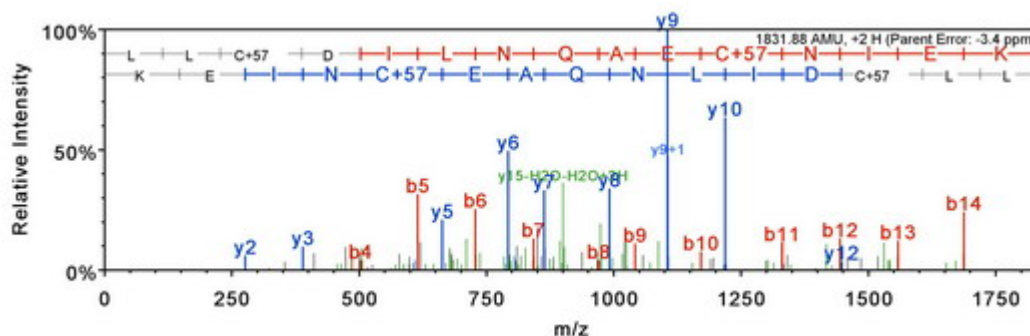

| B  | B ions | B+2H  | B-NH3  | B-H2O  | AA   | Y ions | Y+2H  | Y-NH3  | Y-H2O  | Y  |
|----|--------|-------|--------|--------|------|--------|-------|--------|--------|----|
| 1  | 114.1  |       |        |        | L    | 1832.9 | 917.0 | 1815.9 | 1814.9 | 15 |
| 2  | 227.2  |       |        |        | L    | 1719.8 | 860.4 | 1702.8 | 1701.8 | 14 |
| 3  | 387.2  |       |        |        | C+57 | 1606.7 | 803.9 | 1589.7 | 1588.7 | 13 |
| 4  | 502.2  |       |        | 484.2  | D    | 1446.7 | 723.9 | 1429.7 | 1428.7 | 12 |
| 5  | 615.3  |       |        | 597.3  | I    | 1331.7 | 666.3 | 1314.6 | 1313.7 | 11 |
| 6  | 728.4  | 364.7 |        | 710.4  | L    | 1218.6 | 609.8 | 1201.5 | 1200.6 | 10 |
| 7  | 842.4  | 421.7 | 825.4  | 824.4  | N    | 1105.5 | 553.3 | 1088.5 | 1087.5 | 9  |
| 8  | 970.5  | 485.8 | 953.5  | 952.5  | Q    | 991.5  | 496.2 | 974.4  | 973.4  | 8  |
| 9  | 1041.5 | 521.3 | 1024.5 | 1023.5 | A    | 863.4  | 432.2 | 846.4  | 845.4  | 7  |
| 10 | 1170.6 | 585.8 | 1153.6 | 1152.6 | E    | 792.4  | 396.7 | 775.3  | 774.4  | 6  |
| 11 | 1330.6 | 665.8 | 1313.6 | 1312.6 | C+57 | 663.3  |       | 646.3  | 645.3  | 5  |
| 12 | 1444.7 | 722.8 | 1427.6 | 1426.7 | N    | 503.3  |       | 486.3  | 485.3  | 4  |
| 13 | 1557.7 | 779.4 | 1540.7 | 1539.7 | I    | 389.2  |       | 372.2  | 371.2  | 3  |
| 14 | 1686.8 | 843.9 | 1669.8 | 1668.8 | E    | 276.2  |       | 259.1  | 258.1  | 2  |
| 15 | 1832.9 | 917.0 | 1815.9 | 1814.9 | K    | 147.1  |       | 130.1  |        | 1  |

Peptide sequence: (K)ETFIQNDYDAFENLLISK(G)

Exclusive (unique to this protein): TRUE

SEQUEST XCorr score: 2.56 SEQUEST DCn score: 0.665

Fix modifications: None

Variable modifications: None

charge: 2

Observed m/z: 1080.5265

Actual minus calculated peptide mass (AMU): -0.004883

Peptide sequence: (K)IFGSILMSSK(S)

Exclusive (unique to this protein): FALSE  
SEQUEST XCorr score: 2.37 SEQUEST DCn score: 0.554  
Fix modifications: None  
Variable modifications: None  
charge: 2 Observed m/z: 541.7973  
Actual minus calculated peptide mass (AMU): -0.005249

Peptide sequence: (R)GCQDLAEVLK(N)  
Exclusive (unique to this protein): FALSE  
SEQUEST XCorr score: 2.43 SEQUEST DCn score: 0.469  
Fix modifications: C2: Carbamidomethyl (+57.02) Variable modifications: None  
charge: 2 Observed m/z: 566.7841  
Actual minus calculated peptide mass (AMU): -0.0070758

Peptide sequence: (K)NYSDFIVAAYCLK(H)  
Exclusive (unique to this protein): FALSE  
SEQUEST XCorr score: 2.44 SEQUEST DCn score: 0.653  
Fix modifications: C11: Carbamidomethyl (+57.02) Variable modifications: None  
charge: 2 Observed m/z: 782.3776  
Actual minus calculated peptide mass (AMU): -0.004517

Peptide sequence: (K)VLNLSNNLNQGISSLCK(A)  
Exclusive (unique to this protein): FALSE  
SEQUEST XCorr score: 2.41 SEQUEST DCn score: 0.659  
Fix modifications: C17: Carbamidomethyl (+57.02) Variable modifications: None  
charge: 2 Observed m/z: 973.0115  
Actual minus calculated peptide mass (AMU): -0.002441

Peptide sequence: (K)LLCDILNQAECNIEK(L)  
Exclusive (unique to this protein): FALSE  
SEQUEST XCorr score: 2.58 SEQUEST DCn score: 0.454  
Fix modifications: C3: Carbamidomethyl (+57.02), C11: Carbamidomethyl (+57.02) Variable  
modifications: None  
charge: 2 Observed m/z: 916.9451  
Actual minus calculated peptide mass (AMU): -0.00647

Peptide sequence: (K)ASREDLANLLK(C)  
Exclusive (unique to this protein): FALSE  
SEQUEST XCorr score: 2.07 SEQUEST DCn score: 0.177

Fix modifications: None  
Variable modifications: None  
charge: 2 Observed m/z: 671.8851  
Actual minus calculated peptide mass (AMU): -0.007202

Peptide sequence: (K)MLPESSLLLSTTPETF EK(M)  
Exclusive (unique to this protein): FALSE  
SEQUEST XCorr score: 2.22 SEQUEST DCn score: 0.6  
Fix modifications: None  
Variable modifications: None  
charge: 2 Observed m/z: 1012.0167  
Actual minus calculated peptide mass (AMU): -0.005737

Peptide sequence: (K)QPVSTLLSSLLR(R)  
Exclusive (unique to this protein): FALSE  
SEQUEST XCorr score: 2 SEQUEST DCn score: 0.57  
Fix modifications: None  
Variable modifications: None  
charge: 2 Observed m/z: 657.3895  
Actual minus calculated peptide mass (AMU): -0.0081757

Peptide sequence: (K)LGVFFGHR(L)  
Exclusive (unique to this protein): FALSE  
SEQUEST XCorr score: 2.24 SEQUEST DCn score: 0.253  
Fix modifications: None  
Variable modifications: None  
charge: 2 Observed m/z: 466.7558  
Actual minus calculated peptide mass (AMU): -0.006836

Peptide sequence: (R)EWSPSPAPIEEILSQPEK(L)  
Exclusive (unique to this protein): FALSE  
SEQUEST XCorr score: 2.3 SEQUEST DCn score: 0.564  
Fix modifications: None  
Variable modifications: None  
charge: 2 Observed m/z: 1019.0104  
Actual minus calculated peptide mass (AMU): -0.005249

Peptide sequence: (R)NGIFDSDIPTLLDIGMLGK(I)  
Exclusive (unique to this protein): FALSE

SEQUEST XCorr score: 2.72      SEQUEST DCn score: 0.55

Fix modifications: None

Variable modifications: M16: Oxidation (+16.00)

charge: 2                              Observed m/z: 1018.0223

Actual minus calculated peptide mass (AMU): -0.005859

Peptide sequence: (K)TASLAELISR(E)

Exclusive (unique to this protein): FALSE

SEQUEST XCorr score: 2.87      SEQUEST DCn score: 0.534

Fix modifications: None

Variable modifications: None

charge: 2                              Observed m/z: 530.8018

Actual minus calculated peptide mass (AMU): -0.004639

Peptide sequence: (R)AQEAFSLVR(E)

Exclusive (unique to this protein): FALSE

SEQUEST XCorr score: 2.13      SEQUEST DCn score: 0.375

Fix modifications: None

Variable modifications: None

charge: 2                              Observed m/z: 510.775

Actual minus calculated peptide mass (AMU): -0.005554

Gene symbol: Ogdh

Protein name: Isoform 4 of 2-oxoglutarate dehydrogenase E1 component, mitochondrial precursor

Protein accession numbers: IPI00420882,IPI00626237,IPI00719841,IPI00845652

Peptide sequence: (R)NTNAGAPPGTAYQSPLSLSR(S)

Exclusive (unique to this protein): TRUE

SEQUEST XCorr score: 2.14      SEQUEST DCn score: 0.505

Fix modifications: None

Variable modifications: None

charge: 2                              Observed m/z: 1001.5018

Actual minus calculated peptide mass (AMU): -0.003662

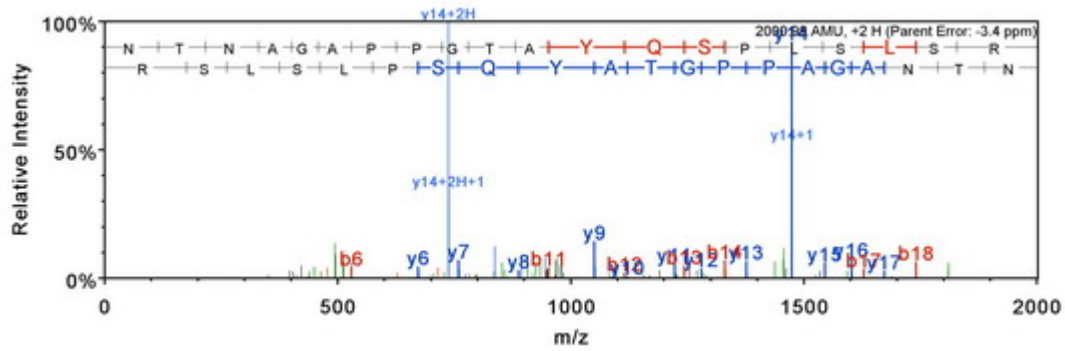

| B  | B Ions | B+2H   | B-NH3  | B-H2O  | AA | Y Ions | Y+2H   | Y-NH3  | Y-H2O  | Y  |
|----|--------|--------|--------|--------|----|--------|--------|--------|--------|----|
| 1  | 115.1  |        | 98.0   |        | N  | 2002.0 | 1001.5 | 1985.0 | 1984.0 | 20 |
| 2  | 216.1  |        | 199.1  | 198.1  | T  | 1888.0 | 944.5  | 1870.9 | 1870.0 | 19 |
| 3  | 330.1  |        | 313.1  | 312.1  | N  | 1786.9 | 894.0  | 1769.9 | 1768.9 | 18 |
| 4  | 401.2  |        | 384.2  | 383.2  | A  | 1672.9 | 836.9  | 1655.8 | 1654.9 | 17 |
| 5  | 458.2  |        | 441.2  | 440.2  | G  | 1601.8 | 801.4  | 1584.8 | 1583.8 | 16 |
| 6  | 529.2  | 265.1  | 512.2  | 511.2  | A  | 1544.8 | 772.9  | 1527.8 | 1526.8 | 15 |
| 7  | 626.3  | 313.7  | 609.3  | 608.3  | P  | 1473.8 | 737.4  | 1456.7 | 1455.8 | 14 |
| 8  | 723.3  | 362.2  | 706.3  | 705.3  | P  | 1376.7 | 688.9  | 1359.7 | 1358.7 | 13 |
| 9  | 780.4  | 390.7  | 763.3  | 762.4  | G  | 1279.7 | 640.3  | 1262.6 | 1261.7 | 12 |
| 10 | 881.4  | 441.2  | 864.4  | 863.4  | T  | 1222.6 | 611.8  | 1205.6 | 1204.6 | 11 |
| 11 | 952.5  | 476.7  | 935.4  | 934.4  | A  | 1121.6 | 561.3  | 1104.6 | 1103.6 | 10 |
| 12 | 1115.5 | 558.3  | 1098.5 | 1097.5 | Y  | 1050.6 | 525.8  | 1033.5 | 1032.5 | 9  |
| 13 | 1243.6 | 622.3  | 1226.5 | 1225.6 | Q  | 887.5  | 444.3  | 870.5  | 869.5  | 8  |
| 14 | 1330.6 | 665.8  | 1313.6 | 1312.6 | S  | 759.4  | 380.2  | 742.4  | 741.4  | 7  |
| 15 | 1427.7 | 714.3  | 1410.6 | 1409.7 | P  | 672.4  | 336.7  | 655.4  | 654.4  | 6  |
| 16 | 1540.7 | 770.9  | 1523.7 | 1522.7 | L  | 575.4  |        | 558.3  | 557.3  | 5  |
| 17 | 1627.8 | 814.4  | 1610.8 | 1609.8 | S  | 462.3  |        | 445.2  | 444.3  | 4  |
| 18 | 1740.9 | 870.9  | 1723.8 | 1722.9 | L  | 375.2  |        | 358.2  | 357.2  | 3  |
| 19 | 1827.9 | 914.5  | 1810.9 | 1809.9 | S  | 262.1  |        | 245.1  | 244.1  | 2  |
| 20 | 2002.0 | 1001.5 | 1985.0 | 1984.0 | R  | 175.1  |        | 158.1  |        | 1  |

Gene symbol: Omt2b

Protein name: oocyte maturation, beta

Protein accession numbers: IPI00127073,IPI00624133,IPI00753313

Peptide sequence: (R)GLQSPVWWNR(R)

Exclusive (unique to this protein): TRUE

SEQUEST XCorr score: 2.34 SEQUEST DCn score: 0.675

Fix modifications: None

Variable modifications: None

charge: 2

Observed m/z: 621.819

Actual minus calculated peptide mass (AMU): -0.008057

Gene symbol: ORF34

Protein name: similar to Protein CXorf17 homolog isoform 2  
 Protein accession numbers: IPI00750786  
 Peptide sequence: (K)NLTTNQFLMQEVAKQLGLK(R)  
 Exclusive (unique to this protein): TRUE  
 SEQUEST XCorr score: 2.02 SEQUEST DCn score: 0.335  
 Fix modifications: None  
 Variable modifications: None  
 charge: 2 Observed m/z: 1088.5839  
 Actual minus calculated peptide mass (AMU): -0.020254

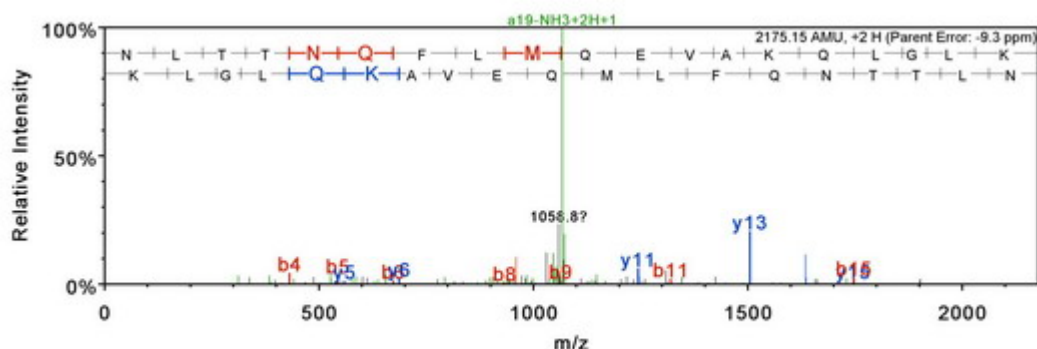

| B  | B ions | B+2H   | B-NH3  | B-H2O  | AA | Y ions | Y+2H   | Y-NH3  | Y-H2O  | Y  |
|----|--------|--------|--------|--------|----|--------|--------|--------|--------|----|
| 1  | 115.1  |        | 98.0   |        | N  | 2176.2 | 1088.6 | 2159.2 | 2158.2 | 19 |
| 2  | 228.1  |        | 211.1  |        | L  | 2062.1 | 1031.6 | 2045.1 | 2044.1 | 18 |
| 3  | 329.2  |        | 312.2  | 311.2  | T  | 1949.1 | 975.0  | 1932.0 | 1931.0 | 17 |
| 4  | 430.2  |        | 413.2  | 412.2  | T  | 1848.0 | 924.5  | 1831.0 | 1830.0 | 16 |
| 5  | 544.3  |        | 527.3  | 526.3  | N  | 1747.0 | 874.0  | 1729.9 | 1729.0 | 15 |
| 6  | 672.3  | 336.7  | 655.3  | 654.3  | Q  | 1632.9 | 817.0  | 1615.9 | 1614.9 | 14 |
| 7  | 819.4  | 410.2  | 802.4  | 801.4  | F  | 1504.9 | 752.9  | 1487.8 | 1486.9 | 13 |
| 8  | 932.5  | 466.8  | 915.5  | 914.5  | L  | 1357.8 | 679.4  | 1340.8 | 1339.8 | 12 |
| 9  | 1063.5 | 532.3  | 1046.5 | 1045.5 | M  | 1244.7 | 622.9  | 1227.7 | 1226.7 | 11 |
| 10 | 1191.6 | 596.3  | 1174.6 | 1173.6 | Q  | 1113.7 | 557.3  | 1096.6 | 1095.7 | 10 |
| 11 | 1320.6 | 660.8  | 1303.6 | 1302.6 | E  | 985.6  | 493.3  | 968.6  | 967.6  | 9  |
| 12 | 1419.7 | 710.4  | 1402.7 | 1401.7 | V  | 856.6  | 428.8  | 839.5  |        | 8  |
| 13 | 1490.7 | 745.9  | 1473.7 | 1472.7 | A  | 757.5  | 379.3  | 740.5  |        | 7  |
| 14 | 1618.8 | 809.9  | 1601.8 | 1600.8 | K  | 686.5  | 343.7  | 669.4  |        | 6  |
| 15 | 1746.9 | 874.0  | 1729.9 | 1728.9 | Q  | 558.4  |        | 541.3  |        | 5  |
| 16 | 1860.0 | 930.5  | 1842.9 | 1842.0 | L  | 430.3  |        | 413.3  |        | 4  |
| 17 | 1917.0 | 959.0  | 1900.0 | 1899.0 | G  | 317.2  |        | 300.2  |        | 3  |
| 18 | 2030.1 | 1015.5 | 2013.1 | 2012.1 | L  | 260.2  |        | 243.2  |        | 2  |
| 19 | 2176.2 | 1088.6 | 2159.2 | 2158.2 | K  | 147.1  |        | 130.1  |        | 1  |

Gene symbol: Osbp  
 Protein name: oxysterol binding protein  
 Protein accession numbers: IPI00755161  
 Peptide sequence: (R)GVVGPAAIAAPGGGGAGPPAVGGGGGR(G)  
 Exclusive (unique to this protein): TRUE  
 SEQUEST XCorr score: 3.01 SEQUEST DCn score: 0.726  
 Fix modifications: None

Variable modifications: None

charge: 2

Observed m/z: 1119.5885

Actual minus calculated peptide mass (AMU): -0.0056153

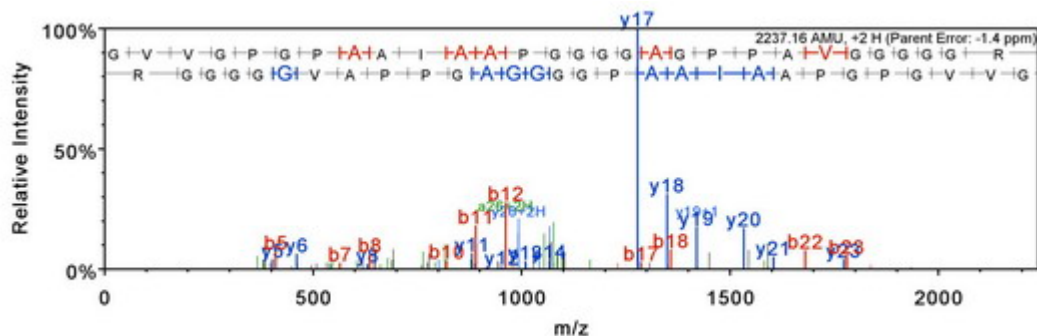

| B  | B ions | B+2H   | B-NH3  | B-H2O | AA | Y ions | Y+2H   | Y-NH3  | Y-H2O | Y  |
|----|--------|--------|--------|-------|----|--------|--------|--------|-------|----|
| 1  | 58.0   |        |        |       | G  | 2238.2 | 1119.6 | 2221.2 |       | 29 |
| 2  | 157.1  |        |        |       | V  | 2181.2 | 1091.1 | 2164.1 |       | 28 |
| 3  | 256.2  |        |        |       | V  | 2082.1 | 1041.5 | 2065.1 |       | 27 |
| 4  | 313.2  |        |        |       | G  | 1983.0 | 992.0  | 1966.0 |       | 26 |
| 5  | 410.2  |        |        |       | P  | 1926.0 | 963.5  | 1909.0 |       | 25 |
| 6  | 467.3  | 234.1  |        |       | G  | 1828.9 | 915.0  | 1811.9 |       | 24 |
| 7  | 564.3  | 282.7  |        |       | P  | 1771.9 | 886.5  | 1754.9 |       | 23 |
| 8  | 635.4  | 318.2  |        |       | A  | 1674.9 | 837.9  | 1657.8 |       | 22 |
| 9  | 706.4  | 353.7  |        |       | A  | 1603.8 | 802.4  | 1586.8 |       | 21 |
| 10 | 819.5  | 410.2  |        |       | I  | 1532.8 | 766.9  | 1515.8 |       | 20 |
| 11 | 890.5  | 445.8  |        |       | A  | 1419.7 | 710.4  | 1402.7 |       | 19 |
| 12 | 961.6  | 481.3  |        |       | A  | 1348.7 | 674.8  | 1331.7 |       | 18 |
| 13 | 1058.6 | 529.8  |        |       | P  | 1277.6 | 639.3  | 1260.6 |       | 17 |
| 14 | 1115.6 | 558.3  |        |       | G  | 1180.6 | 590.8  | 1163.6 |       | 16 |
| 15 | 1172.6 | 586.8  |        |       | G  | 1123.6 | 562.3  | 1106.5 |       | 15 |
| 16 | 1229.7 | 615.3  |        |       | G  | 1066.5 | 533.8  | 1049.5 |       | 14 |
| 17 | 1286.7 | 643.9  |        |       | G  | 1009.5 | 505.3  | 992.5  |       | 13 |
| 18 | 1357.7 | 679.4  |        |       | A  | 952.5  | 476.8  | 935.5  |       | 12 |
| 19 | 1414.7 | 707.9  |        |       | G  | 881.5  | 441.2  | 864.4  |       | 11 |
| 20 | 1511.8 | 756.4  |        |       | P  | 824.4  | 412.7  | 807.4  |       | 10 |
| 21 | 1608.9 | 804.9  |        |       | P  | 727.4  | 364.2  | 710.4  |       | 9  |
| 22 | 1679.9 | 840.5  |        |       | A  | 630.3  | 315.7  | 613.3  |       | 8  |
| 23 | 1779.0 | 890.0  |        |       | V  | 559.3  | 280.2  | 542.3  |       | 7  |
| 24 | 1836.0 | 918.5  |        |       | G  | 460.2  | 230.6  | 443.2  |       | 6  |
| 25 | 1893.0 | 947.0  |        |       | G  | 403.2  |        | 386.2  |       | 5  |
| 26 | 1950.0 | 975.5  |        |       | G  | 346.2  |        | 329.2  |       | 4  |
| 27 | 2007.0 | 1004.0 |        |       | G  | 289.2  |        | 272.1  |       | 3  |
| 28 | 2064.1 | 1032.5 |        |       | G  | 232.1  |        | 215.1  |       | 2  |
| 29 | 2238.2 | 1119.6 | 2221.2 |       | R  | 175.1  |        | 158.1  |       | 1  |

Gene symbol: OTTMUSG00000001305

Protein name: CDNA sequence BC099439

Protein accession numbers: IPI00346337

Peptide sequence: (R)ECGFTSQVARPEAPATVGLAFR(T)

Exclusive (unique to this protein): TRUE

SEQUEST XCorr score: 2.49 SEQUEST DCn score: 0.507



Fix modifications: C2: Carbamidomethyl (+57.02) Variable modifications: None  
charge: 2 Observed m/z: 1182.5895  
Actual minus calculated peptide mass (AMU): -0.006104

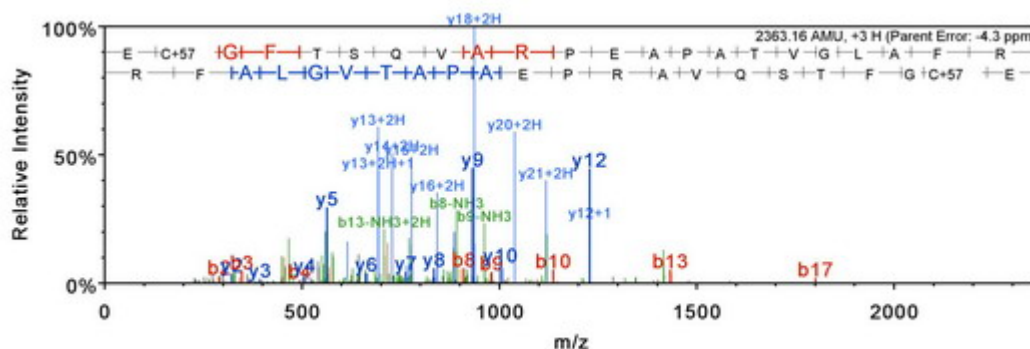

| B  | B ions | B+2H   | B-NH3  | B-H2O  | AA   | Y ions | Y+2H   | Y-NH3  | Y-H2O  | Y  |
|----|--------|--------|--------|--------|------|--------|--------|--------|--------|----|
| 1  | 130.1  |        |        | 112.0  | E    | 2364.2 | 1182.6 | 2347.2 | 2346.2 | 22 |
| 2  | 290.1  |        |        | 272.1  | C+57 | 2235.1 | 1118.1 | 2218.1 | 2217.1 | 21 |
| 3  | 347.1  |        |        | 329.1  | G    | 2075.1 | 1038.1 | 2058.1 | 2057.1 | 20 |
| 4  | 494.2  |        |        | 476.2  | F    | 2018.1 | 1009.6 | 2001.1 | 2000.1 | 19 |
| 5  | 595.2  |        |        | 577.2  | T    | 1871.0 | 936.0  | 1854.0 | 1853.0 | 18 |
| 6  | 682.3  | 341.6  |        | 664.2  | S    | 1770.0 | 885.5  | 1752.9 | 1752.0 | 17 |
| 7  | 810.3  | 405.7  | 793.3  | 792.3  | Q    | 1682.9 | 842.0  | 1665.9 | 1664.9 | 16 |
| 8  | 909.4  | 455.2  | 892.4  | 891.4  | V    | 1554.9 | 777.9  | 1537.9 | 1536.9 | 15 |
| 9  | 980.4  | 490.7  | 963.4  | 962.4  | A    | 1455.8 | 728.4  | 1438.8 | 1437.8 | 14 |
| 10 | 1136.5 | 568.8  | 1119.5 | 1118.5 | R    | 1384.8 | 692.9  | 1367.7 | 1366.8 | 13 |
| 11 | 1233.6 | 617.3  | 1216.5 | 1215.6 | P    | 1228.7 | 614.8  | 1211.6 | 1210.7 | 12 |
| 12 | 1362.6 | 681.8  | 1345.6 | 1344.6 | E    | 1131.6 | 566.3  | 1114.6 | 1113.6 | 11 |
| 13 | 1433.7 | 717.3  | 1416.6 | 1415.6 | A    | 1002.6 | 501.8  | 985.6  | 984.6  | 10 |
| 14 | 1530.7 | 765.9  | 1513.7 | 1512.7 | P    | 931.5  | 466.3  | 914.5  | 913.5  | 9  |
| 15 | 1601.7 | 801.4  | 1584.7 | 1583.7 | A    | 834.5  | 417.8  | 817.5  | 816.5  | 8  |
| 16 | 1702.8 | 851.9  | 1685.8 | 1684.8 | T    | 763.5  | 382.2  | 746.4  | 745.4  | 7  |
| 17 | 1801.9 | 901.4  | 1784.8 | 1783.8 | V    | 662.4  | 331.7  | 645.4  |        | 6  |
| 18 | 1858.9 | 929.9  | 1841.9 | 1840.9 | G    | 563.3  |        | 546.3  |        | 5  |
| 19 | 1972.0 | 986.5  | 1954.9 | 1954.0 | L    | 506.3  |        | 489.3  |        | 4  |
| 20 | 2043.0 | 1022.0 | 2026.0 | 2025.0 | A    | 393.2  |        | 376.2  |        | 3  |
| 21 | 2190.1 | 1095.5 | 2173.0 | 2172.1 | F    | 322.2  |        | 305.2  |        | 2  |
| 22 | 2364.2 | 1182.6 | 2347.2 | 2346.2 | R    | 175.1  |        | 158.1  |        | 1  |

Gene symbol: P4hb

Protein name: 17 days embryo kidney cDNA, RIKEN full-length enriched library,  
clone:I920160L24 product:prolyl 4-hydroxylase, beta polypeptide, full insert sequence

Protein accession numbers: IPI00122815,IPI00133522

Peptide sequence: (K)VDATEESDLAQQYGVR(G)

Exclusive (unique to this protein): TRUE

SEQUEST XCorr score: 2.78 SEQUEST DCn score: 0.649

Fix modifications: None

Variable modifications: None

charge: 2

Observed m/z: 890.92

Actual minus calculated peptide mass (AMU): -0.0031752

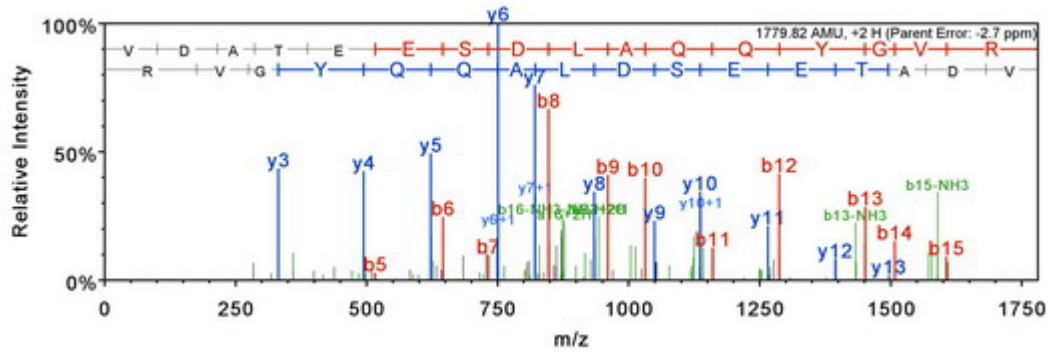

| B  | B Ions | B+2H  | B-NH3  | B-H2O  | AA | Y Ions | Y+2H  | Y-NH3  | Y-H2O  | Y  |
|----|--------|-------|--------|--------|----|--------|-------|--------|--------|----|
| 1  | 100.1  |       |        |        | V  | 1780.8 | 890.9 | 1763.8 | 1762.8 | 16 |
| 2  | 215.1  |       |        | 197.1  | D  | 1681.8 | 841.4 | 1664.7 | 1663.8 | 15 |
| 3  | 286.1  |       |        | 268.1  | A  | 1566.7 | 783.9 | 1549.7 | 1548.7 | 14 |
| 4  | 387.2  |       |        | 369.2  | T  | 1495.7 | 748.4 | 1478.7 | 1477.7 | 13 |
| 5  | 516.2  |       |        | 498.2  | E  | 1394.7 | 697.8 | 1377.6 | 1376.6 | 12 |
| 6  | 645.3  | 323.1 |        | 627.3  | E  | 1265.6 | 633.3 | 1248.6 | 1247.6 | 11 |
| 7  | 732.3  | 366.7 |        | 714.3  | S  | 1136.6 | 568.8 | 1119.5 | 1118.6 | 10 |
| 8  | 847.3  | 424.2 |        | 829.3  | D  | 1049.5 | 525.3 | 1032.5 | 1031.5 | 9  |
| 9  | 960.4  | 480.7 |        | 942.4  | L  | 934.5  | 467.8 | 917.5  |        | 8  |
| 10 | 1031.5 | 516.2 |        | 1013.4 | A  | 821.4  | 411.2 | 804.4  |        | 7  |
| 11 | 1159.5 | 580.3 | 1142.5 | 1141.5 | Q  | 750.4  | 375.7 | 733.4  |        | 6  |
| 12 | 1287.6 | 644.3 | 1270.5 | 1269.6 | Q  | 622.3  |       | 605.3  |        | 5  |
| 13 | 1450.6 | 725.8 | 1433.6 | 1432.6 | Y  | 494.3  |       | 477.3  |        | 4  |
| 14 | 1507.7 | 754.3 | 1490.6 | 1489.6 | G  | 331.2  |       | 314.2  |        | 3  |
| 15 | 1606.7 | 803.9 | 1589.7 | 1588.7 | V  | 274.2  |       | 257.2  |        | 2  |
| 16 | 1780.8 | 890.9 | 1763.8 | 1762.8 | R  | 175.1  |       | 158.1  |        | 1  |

Gene symbol: Pafah1b3

Protein name: Platelet-activating factor acetylhydrolase IB subunit gamma

Protein accession numbers: IPI00118819

Peptide sequence: (R)VVVLGLLPR(G)

Exclusive (unique to this protein): TRUE

SEQUEST XCorr score: 2.62 SEQUEST DCn score: 0.768

Fix modifications: None

Variable modifications: None

charge: 2

Observed m/z: 483.3263

Actual minus calculated peptide mass (AMU): -0.0065349

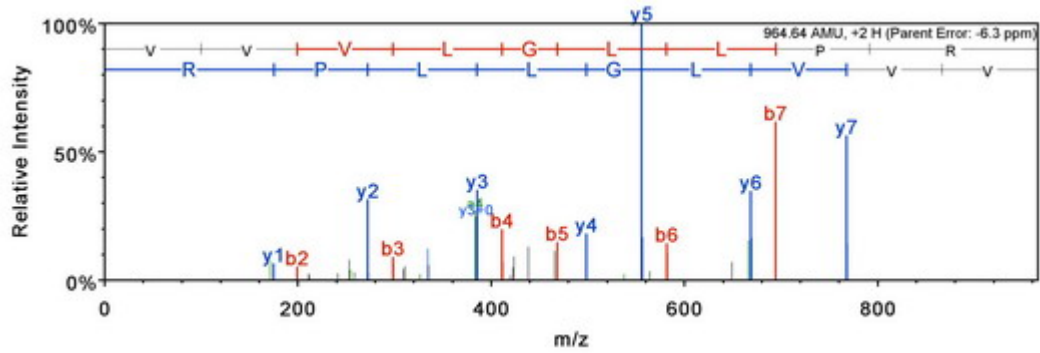

| B | B ions | B+2H  | B-NH3 | B-H2O | AA | Y ions | Y+2H  | Y-NH3 | Y-H2O | Y |
|---|--------|-------|-------|-------|----|--------|-------|-------|-------|---|
| 1 | 100.1  |       |       |       | V  | 965.7  | 483.3 | 948.6 |       | 9 |
| 2 | 199.1  |       |       |       | V  | 866.6  | 433.8 | 849.6 |       | 8 |
| 3 | 298.2  |       |       |       | V  | 767.5  | 384.3 | 750.5 |       | 7 |
| 4 | 411.3  |       |       |       | L  | 668.5  | 334.7 | 651.4 |       | 6 |
| 5 | 468.3  |       |       |       | G  | 555.4  |       | 538.3 |       | 5 |
| 6 | 581.4  | 291.2 |       |       | L  | 498.3  |       | 481.3 |       | 4 |
| 7 | 694.5  | 347.8 |       |       | L  | 385.3  |       | 368.2 |       | 3 |
| 8 | 791.5  | 396.3 |       |       | P  | 272.2  |       | 255.2 |       | 2 |
| 9 | 965.7  | 483.3 | 948.6 |       | R  | 175.1  |       | 158.1 |       | 1 |

Gene symbol: Pcbp1

Protein name: Poly(rC)-binding protein 1

Protein accession numbers: IPI00128904

Peptide sequence: (R)IITLTGPTNAIFK(A)

Exclusive (unique to this protein): TRUE

SEQUEST XCorr score: 2.26 SEQUEST DCn score: 0.669

Fix modifications: None

Variable modifications: None

charge: 2

Observed m/z: 694.9084

Actual minus calculated peptide mass (AMU): -0.00647

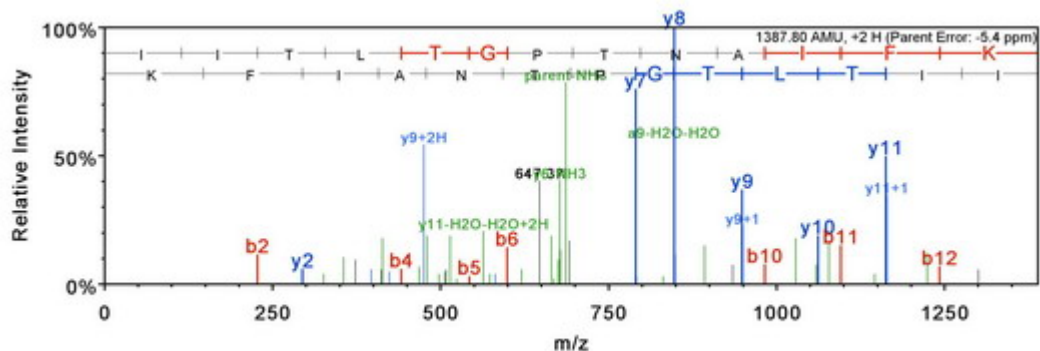

| B  | B Ions | B+2H  | B-NH3  | B-H2O  | AA | Y Ions | Y+2H  | Y-NH3  | Y-H2O  | Y  |
|----|--------|-------|--------|--------|----|--------|-------|--------|--------|----|
| 1  | 114.1  |       |        |        | I  | 1388.8 | 694.9 | 1371.8 | 1370.8 | 13 |
| 2  | 227.2  |       |        |        | I  | 1275.7 | 638.4 | 1258.7 | 1257.7 | 12 |
| 3  | 328.2  |       |        | 310.2  | T  | 1162.7 | 581.8 | 1145.6 | 1144.6 | 11 |
| 4  | 441.3  |       |        | 423.3  | L  | 1061.6 | 531.3 | 1044.6 | 1043.6 | 10 |
| 5  | 542.4  |       |        | 524.3  | T  | 948.5  | 474.8 | 931.5  | 930.5  | 9  |
| 6  | 599.4  | 300.2 |        | 581.4  | G  | 847.5  | 424.2 | 830.4  | 829.5  | 8  |
| 7  | 696.4  | 348.7 |        | 678.4  | P  | 790.5  | 395.7 | 773.4  | 772.4  | 7  |
| 8  | 797.5  | 399.2 |        | 779.5  | T  | 693.4  | 347.2 | 676.4  | 675.4  | 6  |
| 9  | 911.5  | 456.3 | 894.5  | 893.5  | N  | 592.4  |       | 575.3  |        | 5  |
| 10 | 982.6  | 491.8 | 965.5  | 964.6  | A  | 478.3  |       | 461.3  |        | 4  |
| 11 | 1095.6 | 548.3 | 1078.6 | 1077.6 | I  | 407.3  |       | 390.2  |        | 3  |
| 12 | 1242.7 | 621.9 | 1225.7 | 1224.7 | F  | 294.2  |       | 277.2  |        | 2  |
| 13 | 1388.8 | 694.9 | 1371.8 | 1370.8 | K  | 147.1  |       | 130.1  |        | 1  |

Gene symbol: Pcdhga2

Protein name: Protocadherin gamma A2

Protein accession numbers: IPI00229636

Peptide sequence: (K)YKLNSNDHFSLDVRTGADGNK(Y)

Exclusive (unique to this protein): TRUE

SEQUEST XCorr score: 2.55 SEQUEST DCn score: 0.366

Fix modifications: None

Variable modifications: None

charge: 3 Observed m/z: 784.3781

Actual minus calculated peptide mass (AMU): -0.019257

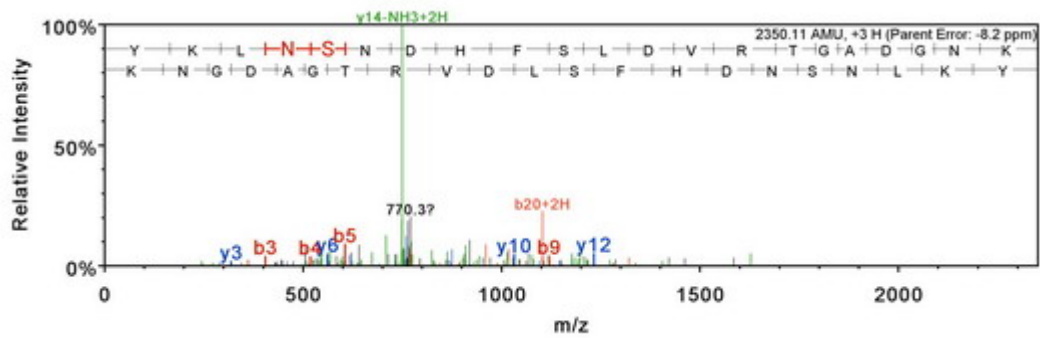

| B  | B Ions | B+2H   | B-NH3  | B-H2O  | AA | Y Ions | Y+2H   | Y-NH3  | Y-H2O  | Y  |
|----|--------|--------|--------|--------|----|--------|--------|--------|--------|----|
| 1  | 164.1  |        |        |        | Y  | 2351.1 | 1176.1 | 2334.1 | 2333.1 | 21 |
| 2  | 292.2  | 146.6  | 275.1  |        | K  | 2188.1 | 1094.5 | 2171.1 | 2170.1 | 20 |
| 3  | 405.3  | 203.1  | 388.2  |        | L  | 2060.0 | 1030.5 | 2043.0 | 2042.0 | 19 |
| 4  | 519.3  | 260.1  | 502.3  |        | N  | 1946.9 | 974.0  | 1929.9 | 1928.9 | 18 |
| 5  | 606.3  | 303.7  | 589.3  | 588.3  | S  | 1832.9 | 916.9  | 1815.8 | 1814.8 | 17 |
| 6  | 720.4  | 360.7  | 703.3  | 702.4  | N  | 1745.8 | 873.4  | 1728.8 | 1727.8 | 16 |
| 7  | 835.4  | 418.2  | 818.4  | 817.4  | D  | 1631.8 | 816.4  | 1614.8 | 1613.8 | 15 |
| 8  | 972.5  | 486.7  | 955.4  | 954.4  | H  | 1516.8 | 758.9  | 1499.7 | 1498.7 | 14 |
| 9  | 1119.5 | 560.3  | 1102.5 | 1101.5 | F  | 1379.7 | 690.4  | 1362.7 | 1361.7 | 13 |
| 10 | 1206.5 | 603.8  | 1189.5 | 1188.5 | S  | 1232.6 | 616.8  | 1215.6 | 1214.6 | 12 |
| 11 | 1319.6 | 660.3  | 1302.6 | 1301.6 | L  | 1145.6 | 573.3  | 1128.6 | 1127.6 | 11 |
| 12 | 1434.7 | 717.8  | 1417.6 | 1416.7 | D  | 1032.5 | 516.8  | 1015.5 | 1014.5 | 10 |
| 13 | 1533.7 | 767.4  | 1516.7 | 1515.7 | V  | 917.5  | 459.2  | 900.5  | 899.5  | 9  |
| 14 | 1689.8 | 845.4  | 1672.8 | 1671.8 | R  | 818.4  | 409.7  | 801.4  | 800.4  | 8  |
| 15 | 1790.9 | 896.0  | 1773.9 | 1772.9 | T  | 662.3  | 331.7  | 645.3  | 644.3  | 7  |
| 16 | 1847.9 | 924.5  | 1830.9 | 1829.9 | G  | 561.3  | 281.1  | 544.2  | 543.3  | 6  |
| 17 | 1918.9 | 960.0  | 1901.9 | 1900.9 | A  | 504.2  |        | 487.2  | 486.2  | 5  |
| 18 | 2034.0 | 1017.5 | 2016.9 | 2016.0 | D  | 433.2  |        | 416.2  | 415.2  | 4  |
| 19 | 2091.0 | 1046.0 | 2074.0 | 2073.0 | G  | 318.2  |        | 301.2  |        | 3  |
| 20 | 2205.0 | 1103.0 | 2188.0 | 2187.0 | N  | 261.2  |        | 244.1  |        | 2  |
| 21 | 2351.1 | 1176.1 | 2334.1 | 2333.1 | K  | 147.1  |        | 130.1  |        | 1  |

Gene symbol: Pcmt1

Protein name: Isoform 1 of Protein-L-isoaspartate(D-aspartate) O-methyltransferase

Protein accession numbers: IPI00329913,IPI00480558,IPI00757109

Peptide sequence: (K)ALDVGSGSGILTACFAR(M)

Exclusive (unique to this protein): TRUE

SEQUEST XCorr score: 2.94 SEQUEST DCn score: 0.722

Fix modifications: C14: Carbamidomethyl (+57.02) Variable modifications: None

charge: 2

Observed m/z: 847.927

Actual minus calculated peptide mass (AMU): -0.0074454

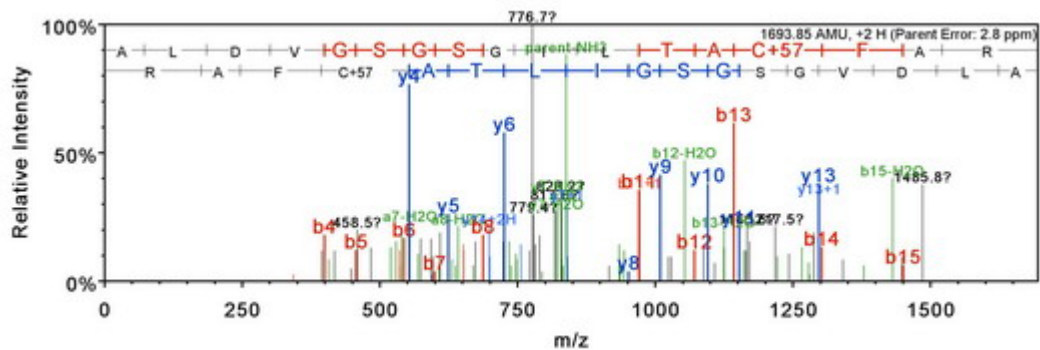

| B  | B Ions | B+2H  | B-NH3  | B-H2O  | AA   | Y Ions | Y+2H  | Y-NH3  | Y-H2O  | Y  |
|----|--------|-------|--------|--------|------|--------|-------|--------|--------|----|
| 1  | 72.0   |       |        |        | A    | 1694.9 | 847.9 | 1677.8 | 1676.8 | 17 |
| 2  | 185.1  |       |        |        | L    | 1623.8 | 812.4 | 1606.8 | 1605.8 | 16 |
| 3  | 300.2  |       |        | 282.2  | D    | 1510.7 | 755.9 | 1493.7 | 1492.7 | 15 |
| 4  | 399.2  |       |        | 381.2  | V    | 1395.7 | 698.4 | 1378.7 | 1377.7 | 14 |
| 5  | 456.3  |       |        | 438.2  | G    | 1296.6 | 648.8 | 1279.6 | 1278.6 | 13 |
| 6  | 543.3  | 272.1 |        | 525.3  | S    | 1239.6 | 620.3 | 1222.6 | 1221.6 | 12 |
| 7  | 600.3  | 300.7 |        | 582.3  | G    | 1152.6 | 576.8 | 1135.6 | 1134.6 | 11 |
| 8  | 687.3  | 344.2 |        | 669.3  | S    | 1095.6 | 548.3 | 1078.5 | 1077.5 | 10 |
| 9  | 744.4  | 372.7 |        | 726.3  | G    | 1008.5 | 504.8 | 991.5  | 990.5  | 9  |
| 10 | 857.4  | 429.2 |        | 839.4  | I    | 951.5  | 476.3 | 934.5  | 933.5  | 8  |
| 11 | 970.5  | 485.8 |        | 952.5  | L    | 838.4  | 419.7 | 821.4  | 820.4  | 7  |
| 12 | 1071.6 | 536.3 |        | 1053.6 | T    | 725.3  | 363.2 | 708.3  | 707.3  | 6  |
| 13 | 1142.6 | 571.8 |        | 1124.6 | A    | 624.3  |       | 607.3  |        | 5  |
| 14 | 1302.6 | 651.8 |        | 1284.6 | C+57 | 553.3  |       | 536.2  |        | 4  |
| 15 | 1449.7 | 725.4 |        | 1431.7 | F    | 393.2  |       | 376.2  |        | 3  |
| 16 | 1520.7 | 760.9 |        | 1502.7 | A    | 246.2  |       | 229.1  |        | 2  |
| 17 | 1694.9 | 847.9 | 1677.8 | 1676.8 | R    | 175.1  |       | 158.1  |        | 1  |

Gene symbol: Pcx

Protein name: Activated spleen cDNA, RIKEN full-length enriched library, clone:F830201B12  
product:pyruvate carboxylase, full insert sequence

Protein accession numbers: IPI00114710

Peptide sequence: (R)AEAEAQAEELSFPR(S)

Exclusive (unique to this protein): TRUE

SEQUEST XCorr score: 2.64 SEQUEST DCn score: 0.701

Fix modifications: None

Variable modifications: None

charge: 2

Observed m/z: 774.3681

Actual minus calculated peptide mass (AMU): -0.005859

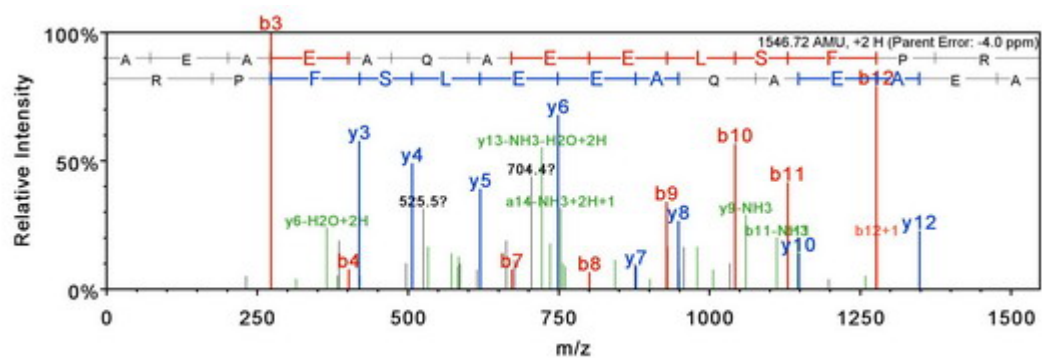

| B  | B Ions | B+2H  | B-NH3  | B-H2O  | A,A | Y Ions | Y+2H  | Y-NH3  | Y-H2O  | Y  |
|----|--------|-------|--------|--------|-----|--------|-------|--------|--------|----|
| 1  | 72.0   |       |        |        | A   | 1547.7 | 774.4 | 1530.7 | 1529.7 | 14 |
| 2  | 201.1  |       |        | 183.1  | E   | 1476.7 | 738.9 | 1459.7 | 1458.7 | 13 |
| 3  | 272.1  |       |        | 254.1  | A   | 1347.7 | 674.3 | 1330.6 | 1329.6 | 12 |
| 4  | 401.2  |       |        | 383.2  | E   | 1276.6 | 638.8 | 1259.6 | 1258.6 | 11 |
| 5  | 472.2  |       |        | 454.2  | A   | 1147.6 | 574.3 | 1130.5 | 1129.6 | 10 |
| 6  | 600.3  | 300.6 | 583.2  | 582.3  | Q   | 1076.5 | 538.8 | 1059.5 | 1058.5 | 9  |
| 7  | 671.3  | 336.2 | 654.3  | 653.3  | A   | 948.5  | 474.7 | 931.5  | 930.5  | 8  |
| 8  | 800.3  | 400.7 | 783.3  | 782.3  | E   | 877.4  | 439.2 | 860.4  | 859.4  | 7  |
| 9  | 929.4  | 465.2 | 912.4  | 911.4  | E   | 748.4  | 374.7 | 731.4  | 730.4  | 6  |
| 10 | 1042.5 | 521.7 | 1025.4 | 1024.5 | L   | 619.4  |       | 602.3  | 601.4  | 5  |
| 11 | 1129.5 | 565.3 | 1112.5 | 1111.5 | S   | 506.3  |       | 489.3  | 488.3  | 4  |
| 12 | 1276.6 | 638.8 | 1259.5 | 1258.6 | F   | 419.2  |       | 402.2  |        | 3  |
| 13 | 1373.6 | 687.3 | 1356.6 | 1355.6 | P   | 272.2  |       | 255.2  |        | 2  |
| 14 | 1547.7 | 774.4 | 1530.7 | 1529.7 | R   | 175.1  |       | 158.1  |        | 1  |

Gene symbol: Pdcd5

Protein name: Programmed cell death protein 5

Protein accession numbers: IPI00116120

Peptide sequence: (R)NSILAQVLDQSAR(A)

Exclusive (unique to this protein): TRUE

SEQUEST XCorr score: 2.51 SEQUEST DCn score: 0.371

Fix modifications: None

Variable modifications: None

charge: 2

Observed m/z: 707.8834

Actual minus calculated peptide mass (AMU): -0.006592

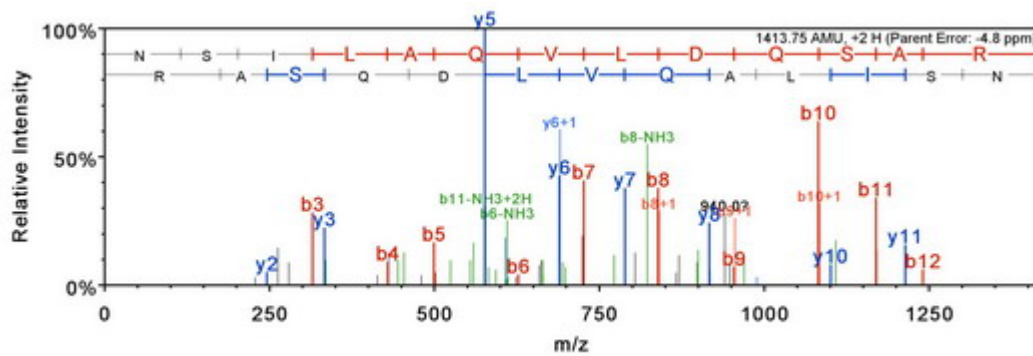

| B  | B Ions | B+2H  | B-NH3  | B-H2O  | AA | Y Ions | Y+2H  | Y-NH3  | Y-H2O  | Y  |
|----|--------|-------|--------|--------|----|--------|-------|--------|--------|----|
| 1  | 115.1  |       | 98.0   |        | N  | 1414.8 | 707.9 | 1397.7 | 1396.8 | 13 |
| 2  | 202.1  |       | 185.1  | 184.1  | S  | 1300.7 | 650.9 | 1283.7 | 1282.7 | 12 |
| 3  | 315.2  |       | 298.1  | 297.2  | I  | 1213.7 | 607.4 | 1196.7 | 1195.7 | 11 |
| 4  | 428.3  |       | 411.2  | 410.2  | L  | 1100.6 | 550.8 | 1083.6 | 1082.6 | 10 |
| 5  | 499.3  |       | 482.3  | 481.3  | A  | 987.5  | 494.3 | 970.5  | 969.5  | 9  |
| 6  | 627.4  | 314.2 | 610.3  | 609.3  | Q  | 916.5  | 458.8 | 899.5  | 898.5  | 8  |
| 7  | 726.4  | 363.7 | 709.4  | 708.4  | V  | 788.4  | 394.7 | 771.4  | 770.4  | 7  |
| 8  | 839.5  | 420.3 | 822.5  | 821.5  | L  | 689.4  | 345.2 | 672.3  | 671.4  | 6  |
| 9  | 954.5  | 477.8 | 937.5  | 936.5  | D  | 576.3  |       | 559.3  | 558.3  | 5  |
| 10 | 1082.6 | 541.8 | 1065.6 | 1064.6 | Q  | 461.3  |       | 444.2  | 443.2  | 4  |
| 11 | 1169.6 | 585.3 | 1152.6 | 1151.6 | S  | 333.2  |       | 316.2  | 315.2  | 3  |
| 12 | 1240.7 | 620.8 | 1223.6 | 1222.6 | A  | 246.2  |       | 229.1  |        | 2  |
| 13 | 1414.8 | 707.9 | 1397.7 | 1396.8 | R  | 175.1  |       | 158.1  |        | 1  |

Gene symbol: Pdha1

Protein name: Pyruvate dehydrogenase E1 component alpha subunit, somatic form, mitochondrial precursor

Protein accession numbers: IPI00337893

Peptide sequence: (R)LEEGPPVTTVLTR(E)

Exclusive (unique to this protein): TRUE

SEQUEST XCorr score: 2.22 SEQUEST DCn score: 0.607

Fix modifications: None

Variable modifications: None

charge: 2

Observed m/z: 706.3906

Actual minus calculated peptide mass (AMU): -0.006592

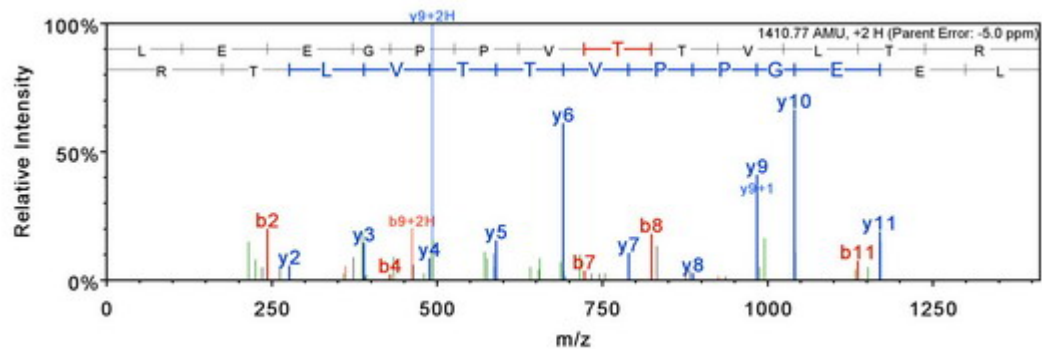



| B  | B Ions | B+2H  | B-NH3  | B-H2O  | A,A | Y Ions | Y+2H  | Y-NH3  | Y-H2O  | Y  |
|----|--------|-------|--------|--------|-----|--------|-------|--------|--------|----|
| 1  | 114.1  |       |        |        | L   | 1411.8 | 706.4 | 1394.8 | 1393.8 | 13 |
| 2  | 243.1  |       |        | 225.1  | E   | 1298.7 | 649.9 | 1281.7 | 1280.7 | 12 |
| 3  | 372.2  |       |        | 354.2  | E   | 1169.7 | 585.3 | 1152.6 | 1151.6 | 11 |
| 4  | 429.2  |       |        | 411.2  | G   | 1040.6 | 520.8 | 1023.6 | 1022.6 | 10 |
| 5  | 526.3  |       |        | 508.2  | P   | 983.6  | 492.3 | 966.6  | 965.6  | 9  |
| 6  | 623.3  | 312.2 |        | 605.3  | P   | 886.5  | 443.8 | 869.5  | 868.5  | 8  |
| 7  | 722.4  | 361.7 |        | 704.4  | V   | 789.5  | 395.3 | 772.5  | 771.5  | 7  |
| 8  | 823.4  | 412.2 |        | 805.4  | T   | 690.4  | 345.7 | 673.4  | 672.4  | 6  |
| 9  | 924.5  | 462.7 |        | 906.5  | T   | 589.4  |       | 572.3  | 571.4  | 5  |
| 10 | 1023.5 | 512.3 |        | 1005.5 | V   | 488.3  |       | 471.3  | 470.3  | 4  |
| 11 | 1136.6 | 568.8 |        | 1118.6 | L   | 389.3  |       | 372.2  | 371.2  | 3  |
| 12 | 1237.7 | 619.3 |        | 1219.7 | T   | 276.2  |       | 259.1  | 258.2  | 2  |
| 13 | 1411.8 | 706.4 | 1394.8 | 1393.8 | R   | 175.1  |       | 158.1  |        | 1  |

Gene symbol: Pfdn2

Protein name: Prefoldin subunit 2

Protein accession numbers: IPI00119545

Peptide sequence: (K)GAVSAEQVIAGFNR(L)

Exclusive (unique to this protein): TRUE

SEQUEST XCorr score: 2.07 SEQUEST DCn score: 0.295

Fix modifications: None

Variable modifications: None

charge: 2

Observed m/z: 709.8745

Actual minus calculated peptide mass (AMU): 0.002075

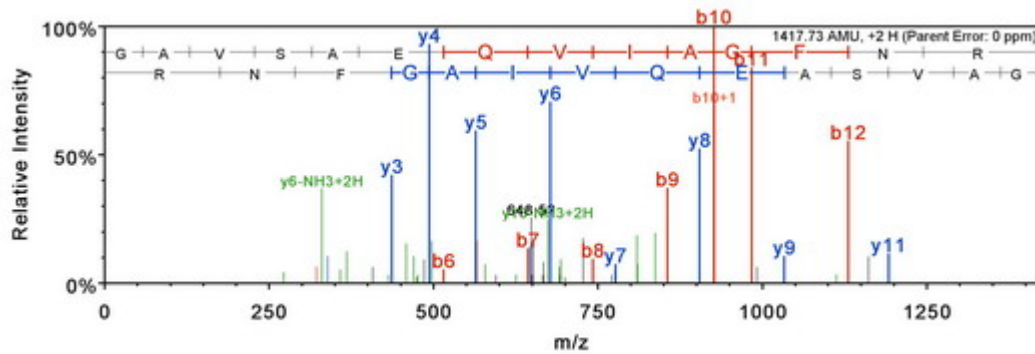

| B  | B ions | B+2H  | B-NH3  | B-H2O  | AA | Y ions | Y+2H  | Y-NH3  | Y-H2O  | Y  |
|----|--------|-------|--------|--------|----|--------|-------|--------|--------|----|
| 1  | 58.0   |       |        |        | G  | 1418.7 | 709.9 | 1401.7 | 1400.7 | 14 |
| 2  | 129.1  |       |        |        | A  | 1361.7 | 681.4 | 1344.7 | 1343.7 | 13 |
| 3  | 228.1  |       |        |        | V  | 1290.7 | 645.8 | 1273.7 | 1272.7 | 12 |
| 4  | 315.2  |       |        | 297.2  | S  | 1191.6 | 596.3 | 1174.6 | 1173.6 | 11 |
| 5  | 386.2  |       |        | 368.2  | A  | 1104.6 | 552.8 | 1087.5 | 1086.6 | 10 |
| 6  | 515.3  | 258.1 |        | 497.2  | E  | 1033.5 | 517.3 | 1016.5 | 1015.5 | 9  |
| 7  | 643.3  | 322.2 | 626.3  | 625.3  | Q  | 904.5  | 452.8 | 887.5  |        | 8  |
| 8  | 742.4  | 371.7 | 725.4  | 724.4  | V  | 776.4  | 388.7 | 759.4  |        | 7  |
| 9  | 855.5  | 428.2 | 838.4  | 837.5  | I  | 677.4  | 339.2 | 660.4  |        | 6  |
| 10 | 926.5  | 463.8 | 909.5  | 908.5  | A  | 564.3  |       | 547.3  |        | 5  |
| 11 | 983.5  | 492.3 | 966.5  | 965.5  | G  | 493.3  |       | 476.2  |        | 4  |
| 12 | 1130.6 | 565.8 | 1113.6 | 1112.6 | F  | 436.2  |       | 419.2  |        | 3  |
| 13 | 1244.6 | 622.8 | 1227.6 | 1226.6 | N  | 289.2  |       | 272.1  |        | 2  |
| 14 | 1418.7 | 709.9 | 1401.7 | 1400.7 | R  | 175.1  |       | 158.1  |        | 1  |
