# Supplementary material for: Proteomic-based identification of maternal proteins in mature mouse oocytes
Source: PubMed Central journal article supplement (PMC2730056; doi:10.1186/1471-2164-10-348), 2009-08-03
Supplement: 1471-2164-10-348-S4.pdf [file 1471-2164-10-348-S4.pdf]

Gene symbol: Pfn2

Protein name: Isoform 2 of Profilin-2

Protein accession numbers: IPI00227805,IPI00228645,IPI00845675

Peptide sequence: (R)EGFFTNGLTLGAK(K)

Exclusive (unique to this protein): TRUE

SEQUEST XCorr score: 2.16 SEQUEST DCn score: 0.626

Fix modifications: None

Variable modifications: None

charge: 2

Observed m/z: 677.8497

Actual minus calculated peptide mass (AMU): -0.0092755

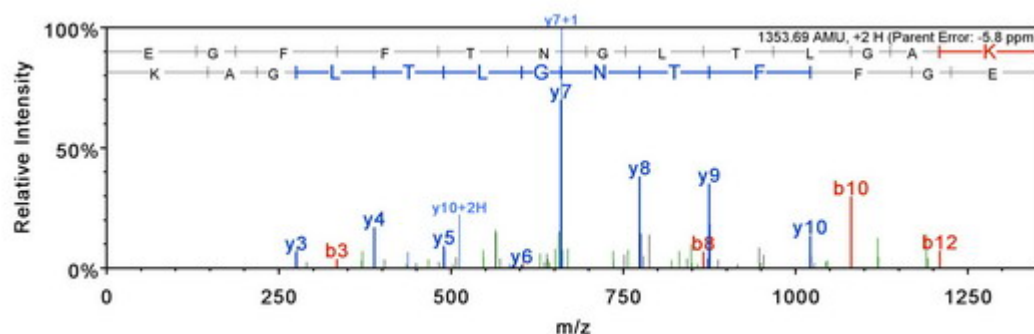

| B  | B ions | B+2H  | B-NH3  | B-H2O  | A,A | Y ions | Y+2H  | Y-NH3  | Y-H2O  | Y  |
|----|--------|-------|--------|--------|-----|--------|-------|--------|--------|----|
| 1  | 130.1  |       |        | 112.0  | E   | 1354.7 | 677.9 | 1337.7 | 1336.7 | 13 |
| 2  | 187.1  |       |        | 169.1  | G   | 1225.7 | 613.3 | 1208.6 | 1207.7 | 12 |
| 3  | 334.1  |       |        | 316.1  | F   | 1168.6 | 584.8 | 1151.6 | 1150.6 | 11 |
| 4  | 481.2  |       |        | 463.2  | F   | 1021.6 | 511.3 | 1004.5 | 1003.6 | 10 |
| 5  | 582.3  |       |        | 564.3  | T   | 874.5  | 437.8 | 857.5  | 856.5  | 9  |
| 6  | 696.3  | 348.7 | 679.3  | 678.3  | N   | 773.5  | 387.2 | 756.4  | 755.4  | 8  |
| 7  | 753.3  | 377.2 | 736.3  | 735.3  | G   | 659.4  | 330.2 | 642.4  | 641.4  | 7  |
| 8  | 866.4  | 433.7 | 849.4  | 848.4  | L   | 602.4  | 301.7 | 585.4  | 584.4  | 6  |
| 9  | 967.5  | 484.2 | 950.4  | 949.4  | T   | 489.3  |       | 472.3  | 471.3  | 5  |
| 10 | 1080.5 | 540.8 | 1063.5 | 1062.5 | L   | 388.3  |       | 371.2  |        | 4  |
| 11 | 1137.6 | 569.3 | 1120.5 | 1119.5 | G   | 275.2  |       | 258.1  |        | 3  |
| 12 | 1208.6 | 604.8 | 1191.6 | 1190.6 | A   | 218.2  |       | 201.1  |        | 2  |
| 13 | 1354.7 | 677.9 | 1337.7 | 1336.7 | K   | 147.1  |       | 130.1  |        | 1  |

Gene symbol: Pgam5

Protein name: Isoform 2 of Phosphoglycerate mutase family member 5 precursor

Protein accession numbers: IPI00226387,IPI00461730,IPI00848970

Peptide sequence: (R)QEEDSYEIFICHANVIR(Y)

Exclusive (unique to this protein): TRUE

SEQUEST XCorr score: 2.24 SEQUEST DCn score: 0.644

Fix modifications: C11: Carbamidomethyl (+57.02)Variable modifications: None

charge: 2

Observed m/z: 1061.9933

Actual minus calculated peptide mass (AMU): -0.007813

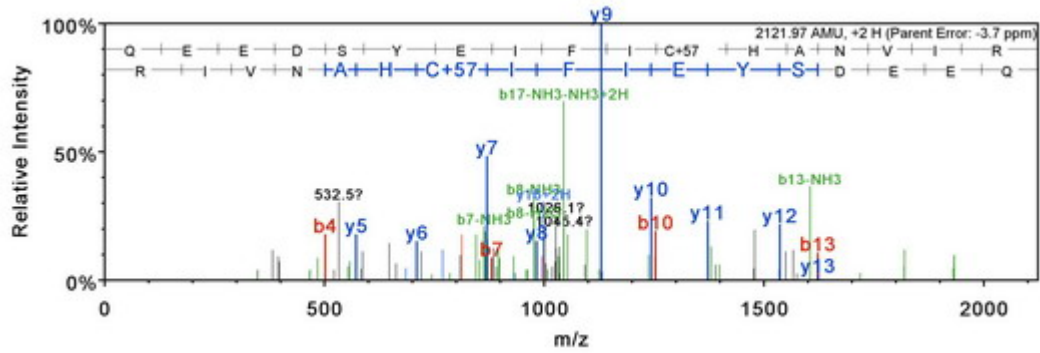

| B  | B ions | B+2H   | B-NH3  | B-H2O  | AA   | Y ions | Y+2H   | Y-NH3  | Y-H2O  | Y  |
|----|--------|--------|--------|--------|------|--------|--------|--------|--------|----|
| 1  | 129.1  |        | 112.0  |        | Q    | 2123.0 | 1062.0 | 2106.0 | 2105.0 | 17 |
| 2  | 258.1  |        | 241.1  | 240.1  | E    | 1994.9 | 998.0  | 1977.9 | 1976.9 | 16 |
| 3  | 387.2  |        | 370.1  | 369.1  | E    | 1865.9 | 933.5  | 1848.9 | 1847.9 | 15 |
| 4  | 502.2  |        | 485.2  | 484.2  | D    | 1736.8 | 868.9  | 1719.8 | 1718.8 | 14 |
| 5  | 589.2  |        | 572.2  | 571.2  | S    | 1621.8 | 811.4  | 1604.8 | 1603.8 | 13 |
| 6  | 752.3  | 376.6  | 735.3  | 734.3  | Y    | 1534.8 | 767.9  | 1517.8 | 1516.8 | 12 |
| 7  | 881.3  | 441.2  | 864.3  | 863.3  | E    | 1371.7 | 686.4  | 1354.7 | 1353.7 | 11 |
| 8  | 994.4  | 497.7  | 977.4  | 976.4  | I    | 1242.7 | 621.8  | 1225.7 |        | 10 |
| 9  | 1141.5 | 571.2  | 1124.4 | 1123.5 | F    | 1129.6 | 565.3  | 1112.6 |        | 9  |
| 10 | 1254.5 | 627.8  | 1237.5 | 1236.5 | I    | 982.5  | 491.8  | 965.5  |        | 8  |
| 11 | 1414.6 | 707.8  | 1397.6 | 1396.6 | C+57 | 869.4  | 435.2  | 852.4  |        | 7  |
| 12 | 1551.6 | 776.3  | 1534.6 | 1533.6 | H    | 709.4  | 355.2  | 692.4  |        | 6  |
| 13 | 1622.7 | 811.8  | 1605.7 | 1604.7 | A    | 572.4  |        | 555.3  |        | 5  |
| 14 | 1736.7 | 868.9  | 1719.7 | 1718.7 | N    | 501.3  |        | 484.3  |        | 4  |
| 15 | 1835.8 | 918.4  | 1818.8 | 1817.8 | V    | 387.3  |        | 370.3  |        | 3  |
| 16 | 1948.9 | 974.9  | 1931.9 | 1930.9 | I    | 288.2  |        | 271.2  |        | 2  |
| 17 | 2123.0 | 1062.0 | 2106.0 | 2105.0 | R    | 175.1  |        | 158.1  |        | 1  |

Gene symbol: Pgk1;EG433594;EG668435

Protein name: Phosphoglycerate kinase 1

Protein accession numbers: IPI00555069

Peptide sequence: (K)LGDVYVNDAFGTAHR(A)

Exclusive (unique to this protein): TRUE

SEQUEST XCorr score: 2.4 SEQUEST DCn score: 0.741

Fix modifications: None

Variable modifications: None

charge: 2 Observed m/z: 817.8967

Actual minus calculated peptide mass (AMU): -0.007202

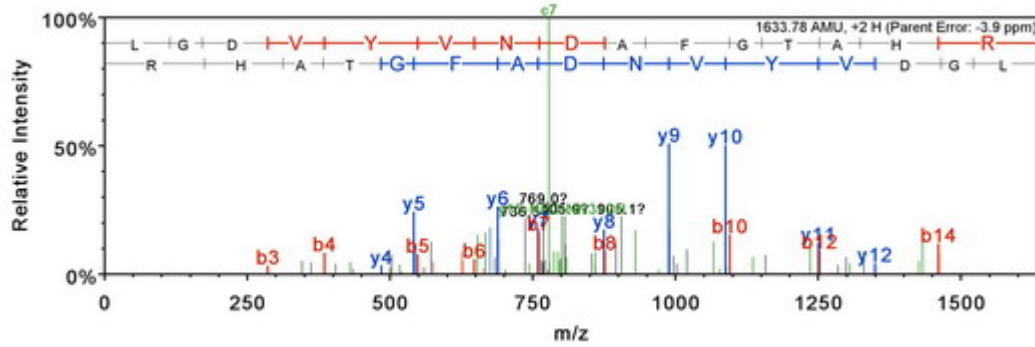

| B  | B ions | B+2H  | B-NH3  | B-H2O  | AA | Y ions | Y+2H  | Y-NH3  | Y-H2O  | Y  |
|----|--------|-------|--------|--------|----|--------|-------|--------|--------|----|
| 1  | 114.1  |       |        |        | L  | 1634.8 | 817.9 | 1617.8 | 1616.8 | 15 |
| 2  | 171.1  |       |        |        | G  | 1521.7 | 761.4 | 1504.7 | 1503.7 | 14 |
| 3  | 286.1  |       |        | 268.1  | D  | 1464.7 | 732.9 | 1447.7 | 1446.7 | 13 |
| 4  | 385.2  |       |        | 367.2  | V  | 1349.7 | 675.3 | 1332.6 | 1331.7 | 12 |
| 5  | 548.3  |       |        | 530.3  | Y  | 1250.6 | 625.8 | 1233.6 | 1232.6 | 11 |
| 6  | 647.3  | 324.2 |        | 629.3  | V  | 1087.5 | 544.3 | 1070.5 | 1069.5 | 10 |
| 7  | 761.4  | 381.2 | 744.4  | 743.4  | N  | 988.5  | 494.7 | 971.4  | 970.5  | 9  |
| 8  | 876.4  | 438.7 | 859.4  | 858.4  | D  | 874.4  | 437.7 | 857.4  | 856.4  | 8  |
| 9  | 947.5  | 474.2 | 930.4  | 929.4  | A  | 759.4  | 380.2 | 742.4  | 741.4  | 7  |
| 10 | 1094.5 | 547.8 | 1077.5 | 1076.5 | F  | 688.4  | 344.7 | 671.3  | 670.3  | 6  |
| 11 | 1151.5 | 576.3 | 1134.5 | 1133.5 | G  | 541.3  | 271.1 | 524.3  | 523.3  | 5  |
| 12 | 1252.6 | 626.8 | 1235.6 | 1234.6 | T  | 484.3  | 242.6 | 467.2  | 466.3  | 4  |
| 13 | 1323.6 | 662.3 | 1306.6 | 1305.6 | A  | 383.2  | 192.1 | 366.2  |        | 3  |
| 14 | 1460.7 | 730.8 | 1443.7 | 1442.7 | H  | 312.2  | 156.6 | 295.2  |        | 2  |
| 15 | 1634.8 | 817.9 | 1617.8 | 1616.8 | R  | 175.1  |       | 158.1  |        | 1  |

Gene symbol: Pgrmc2

Protein name: Membrane-associated progesterone receptor component 2

Protein accession numbers: IPI00351206

Peptide sequence: (R)GLCSGPGAGEESPAATLPR(M)

Exclusive (unique to this protein): TRUE

SEQUEST XCorr score: 2.41 SEQUEST DCn score: 0.743

Fix modifications: C3: Carbamidomethyl (+57.02) Variable modifications: None

charge: 2

Observed m/z: 913.9413

Actual minus calculated peptide mass (AMU): 0.003784

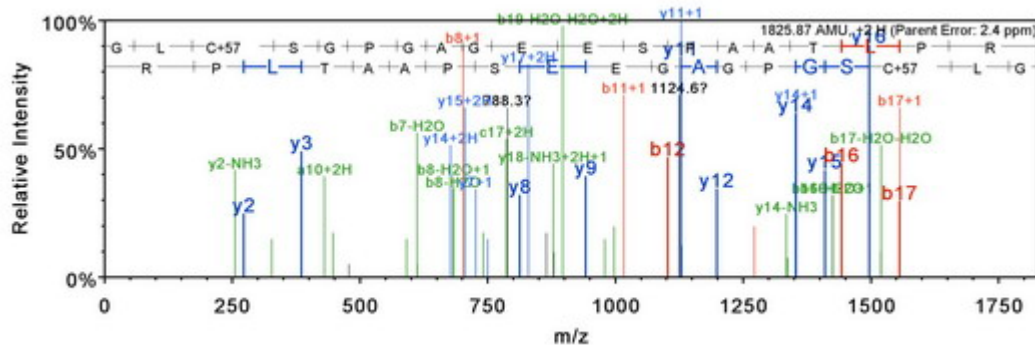

| B  | B Ions | B+2H  | B-NH3  | B-H2O  | A.A  | Y Ions | Y+2H  | Y-NH3  | Y-H2O  | Y  |
|----|--------|-------|--------|--------|------|--------|-------|--------|--------|----|
| 1  | 58.0   |       |        |        | G    | 1826.9 | 913.9 | 1809.8 | 1808.9 | 19 |
| 2  | 171.1  |       |        |        | L    | 1769.9 | 885.4 | 1752.8 | 1751.8 | 18 |
| 3  | 331.1  |       |        |        | C+57 | 1656.8 | 828.9 | 1639.7 | 1638.8 | 17 |
| 4  | 418.2  |       |        | 400.2  | S    | 1496.7 | 748.9 | 1479.7 | 1478.7 | 16 |
| 5  | 475.2  |       |        | 457.2  | G    | 1409.7 | 705.4 | 1392.7 | 1391.7 | 15 |
| 6  | 572.3  | 286.6 |        | 554.2  | P    | 1352.7 | 676.8 | 1335.7 | 1334.7 | 14 |
| 7  | 629.3  | 315.1 |        | 611.3  | G    | 1255.6 | 628.3 | 1238.6 | 1237.6 | 13 |
| 8  | 700.3  | 350.7 |        | 682.3  | A    | 1198.6 | 599.8 | 1181.6 | 1180.6 | 12 |
| 9  | 757.3  | 379.2 |        | 739.3  | G    | 1127.6 | 564.3 | 1110.5 | 1109.6 | 11 |
| 10 | 886.4  | 443.7 |        | 868.4  | E    | 1070.5 | 535.8 | 1053.5 | 1052.5 | 10 |
| 11 | 1015.4 | 508.2 |        | 997.4  | E    | 941.5  | 471.3 | 924.5  | 923.5  | 9  |
| 12 | 1102.5 | 551.7 |        | 1084.4 | S    | 812.5  | 406.7 | 795.4  | 794.5  | 8  |
| 13 | 1199.5 | 600.3 |        | 1181.5 | P    | 725.4  | 363.2 | 708.4  | 707.4  | 7  |
| 14 | 1270.5 | 635.8 |        | 1252.5 | A    | 628.4  | 314.7 | 611.4  | 610.4  | 6  |
| 15 | 1341.6 | 671.3 |        | 1323.6 | A    | 557.3  |       | 540.3  | 539.3  | 5  |
| 16 | 1442.6 | 721.8 |        | 1424.6 | T    | 486.3  |       | 469.3  | 468.3  | 4  |
| 17 | 1555.7 | 778.4 |        | 1537.7 | L    | 385.3  |       | 368.2  |        | 3  |
| 18 | 1652.8 | 826.9 |        | 1634.8 | P    | 272.2  |       | 255.2  |        | 2  |
| 19 | 1826.9 | 913.9 | 1809.8 | 1808.9 | R    | 175.1  |       | 158.1  |        | 1  |

Gene symbol: Pitpna

Protein name: Phosphatidylinositol transfer protein alpha isoform

Protein accession numbers: IPI00230003

Peptide sequence: (R)VILPVSVD EYQVGQLYSVAEASK(N)

Exclusive (unique to this protein): TRUE

SEQUEST XCorr score: 2.4 SEQUEST DCn score: 0.638

Fix modifications: None

Variable modifications: None

charge: 2

Observed m/z: 1247.6605

Actual minus calculated peptide mass (AMU): 0.005371

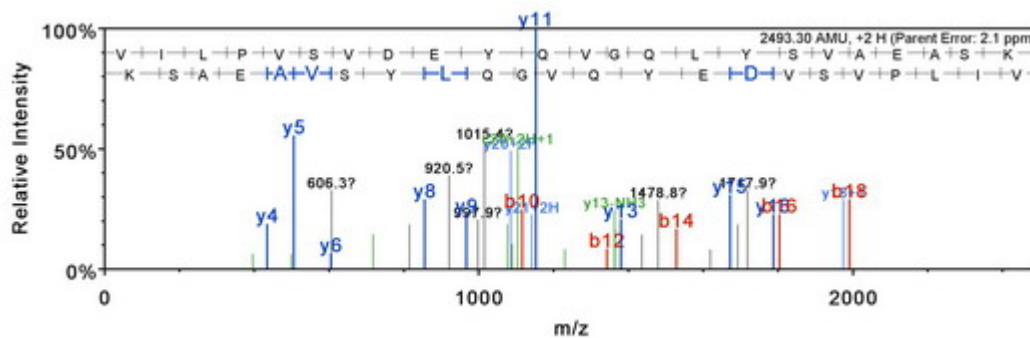

| B  | B Ions | B+2H   | B-NH3  | B-H2O  | A,A | Y Ions | Y+2H   | Y-NH3  | Y-H2O  | Y  |
|----|--------|--------|--------|--------|-----|--------|--------|--------|--------|----|
| 1  | 100.1  |        |        |        | V   | 2494.3 | 1247.7 | 2477.3 | 2476.3 | 23 |
| 2  | 213.2  |        |        |        | I   | 2395.2 | 1198.1 | 2378.2 | 2377.2 | 22 |
| 3  | 326.2  |        |        |        | L   | 2282.2 | 1141.6 | 2265.1 | 2264.1 | 21 |
| 4  | 423.3  |        |        |        | P   | 2169.1 | 1085.0 | 2152.0 | 2151.1 | 20 |
| 5  | 522.4  |        |        |        | V   | 2072.0 | 1036.5 | 2055.0 | 2054.0 | 19 |
| 6  | 609.4  | 305.2  |        | 591.4  | S   | 1973.0 | 987.0  | 1955.9 | 1954.9 | 18 |
| 7  | 708.5  | 354.7  |        | 690.5  | V   | 1885.9 | 943.5  | 1868.9 | 1867.9 | 17 |
| 8  | 823.5  | 412.3  |        | 805.5  | D   | 1786.9 | 893.9  | 1769.8 | 1768.8 | 16 |
| 9  | 952.5  | 476.8  |        | 934.5  | E   | 1671.8 | 836.4  | 1654.8 | 1653.8 | 15 |
| 10 | 1115.6 | 558.3  |        | 1097.6 | Y   | 1542.8 | 771.9  | 1525.8 | 1524.8 | 14 |
| 11 | 1243.7 | 622.3  | 1226.6 | 1225.7 | Q   | 1379.7 | 690.4  | 1362.7 | 1361.7 | 13 |
| 12 | 1342.7 | 671.9  | 1325.7 | 1324.7 | V   | 1251.7 | 626.3  | 1234.6 | 1233.7 | 12 |
| 13 | 1399.8 | 700.4  | 1382.7 | 1381.7 | G   | 1152.6 | 576.8  | 1135.6 | 1134.6 | 11 |
| 14 | 1527.8 | 764.4  | 1510.8 | 1509.8 | Q   | 1095.6 | 548.3  | 1078.5 | 1077.6 | 10 |
| 15 | 1640.9 | 821.0  | 1623.9 | 1622.9 | L   | 967.5  | 484.3  | 950.5  | 949.5  | 9  |
| 16 | 1804.0 | 902.5  | 1786.9 | 1785.9 | Y   | 854.4  | 427.7  | 837.4  | 836.4  | 8  |
| 17 | 1891.0 | 946.0  | 1874.0 | 1873.0 | S   | 691.4  | 346.2  | 674.3  | 673.4  | 7  |
| 18 | 1990.1 | 995.5  | 1973.0 | 1972.0 | V   | 604.3  | 302.7  | 587.3  | 586.3  | 6  |
| 19 | 2061.1 | 1031.0 | 2044.1 | 2043.1 | A   | 505.3  |        | 488.2  | 487.3  | 5  |
| 20 | 2190.1 | 1095.6 | 2173.1 | 2172.1 | E   | 434.2  |        | 417.2  | 416.2  | 4  |
| 21 | 2261.2 | 1131.1 | 2244.1 | 2243.2 | A   | 305.2  |        | 288.2  | 287.2  | 3  |
| 22 | 2348.2 | 1174.6 | 2331.2 | 2330.2 | S   | 234.2  |        | 217.1  | 216.1  | 2  |
| 23 | 2494.3 | 1247.7 | 2477.3 | 2476.3 | K   | 147.1  |        | 130.1  |        | 1  |

Gene symbol: Plaa

Protein name: Phospholipase A-2-activating protein

Protein accession numbers: IPI00226234,IPI00828952

Peptide sequence: (R)YVPGTSGPSNTVQTADPFTGAGR(Y)

Exclusive (unique to this protein): TRUE

SEQUEST XCorr score: 2.03 SEQUEST DCn score: 0.489

Fix modifications: None

Variable modifications: None

charge: 2

Observed m/z: 1140.5455

Actual minus calculated peptide mass (AMU): -0.006592

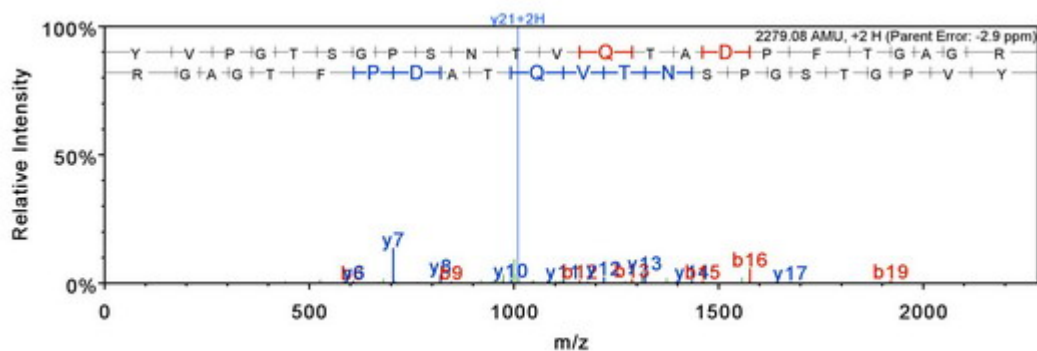

| B  | B Ions | B+2H   | B-NH3  | B-H2O  | A,A | Y Ions | Y+2H   | Y-NH3  | Y-H2O  | Y  |
|----|--------|--------|--------|--------|-----|--------|--------|--------|--------|----|
| 1  | 164.1  |        |        |        | Y   | 2280.1 | 1140.5 | 2263.1 | 2262.1 | 23 |
| 2  | 263.1  |        |        |        | V   | 2117.0 | 1059.0 | 2100.0 | 2099.0 | 22 |
| 3  | 360.2  |        |        |        | P   | 2018.0 | 1009.5 | 2000.9 | 2000.0 | 21 |
| 4  | 417.2  |        |        |        | G   | 1920.9 | 961.0  | 1903.9 | 1902.9 | 20 |
| 5  | 518.3  |        |        | 500.3  | T   | 1863.9 | 932.5  | 1846.9 | 1845.9 | 19 |
| 6  | 605.3  | 303.2  |        | 587.3  | S   | 1762.8 | 881.9  | 1745.8 | 1744.8 | 18 |
| 7  | 662.3  | 331.7  |        | 644.3  | G   | 1675.8 | 838.4  | 1658.8 | 1657.8 | 17 |
| 8  | 759.4  | 380.2  |        | 741.4  | P   | 1618.8 | 809.9  | 1601.8 | 1600.8 | 16 |
| 9  | 846.4  | 423.7  |        | 828.4  | S   | 1521.7 | 761.4  | 1504.7 | 1503.7 | 15 |
| 10 | 960.4  | 480.7  | 943.4  | 942.4  | N   | 1434.7 | 717.9  | 1417.7 | 1416.7 | 14 |
| 11 | 1061.5 | 531.3  | 1044.5 | 1043.5 | T   | 1320.7 | 660.8  | 1303.6 | 1302.6 | 13 |
| 12 | 1160.6 | 580.8  | 1143.5 | 1142.5 | V   | 1219.6 | 610.3  | 1202.6 | 1201.6 | 12 |
| 13 | 1288.6 | 644.8  | 1271.6 | 1270.6 | Q   | 1120.5 | 560.8  | 1103.5 | 1102.5 | 11 |
| 14 | 1389.7 | 695.3  | 1372.6 | 1371.7 | T   | 992.5  | 496.7  | 975.5  | 974.5  | 10 |
| 15 | 1460.7 | 730.9  | 1443.7 | 1442.7 | A   | 891.4  | 446.2  | 874.4  | 873.4  | 9  |
| 16 | 1575.7 | 788.4  | 1558.7 | 1557.7 | D   | 820.4  | 410.7  | 803.4  | 802.4  | 8  |
| 17 | 1672.8 | 836.9  | 1655.8 | 1654.8 | P   | 705.4  | 353.2  | 688.3  | 687.4  | 7  |
| 18 | 1819.9 | 910.4  | 1802.8 | 1801.8 | F   | 608.3  | 304.7  | 591.3  | 590.3  | 6  |
| 19 | 1920.9 | 961.0  | 1903.9 | 1902.9 | T   | 461.3  |        | 444.2  | 443.2  | 5  |
| 20 | 1977.9 | 989.5  | 1960.9 | 1959.9 | G   | 360.2  |        | 343.2  |        | 4  |
| 21 | 2049.0 | 1025.0 | 2031.9 | 2031.0 | A   | 303.2  |        | 286.2  |        | 3  |
| 22 | 2106.0 | 1053.5 | 2088.9 | 2088.0 | G   | 232.1  |        | 215.1  |        | 2  |
| 23 | 2280.1 | 1140.5 | 2263.1 | 2262.1 | R   | 175.1  |        | 158.1  |        | 1  |

Gene symbol: Polr2d

Protein name: DNA-directed RNA polymerase II subunit RPB4

Protein accession numbers: IPI00268215

Peptide sequence: (R)AGDVEEDASQLIFPK(E)

Exclusive (unique to this protein): TRUE

SEQUEST XCorr score: 2.28 SEQUEST DCn score: 0.395

Fix modifications: None

Variable modifications: None

charge: 2

Observed m/z: 809.9033

Actual minus calculated peptide mass (AMU): 0.0021955

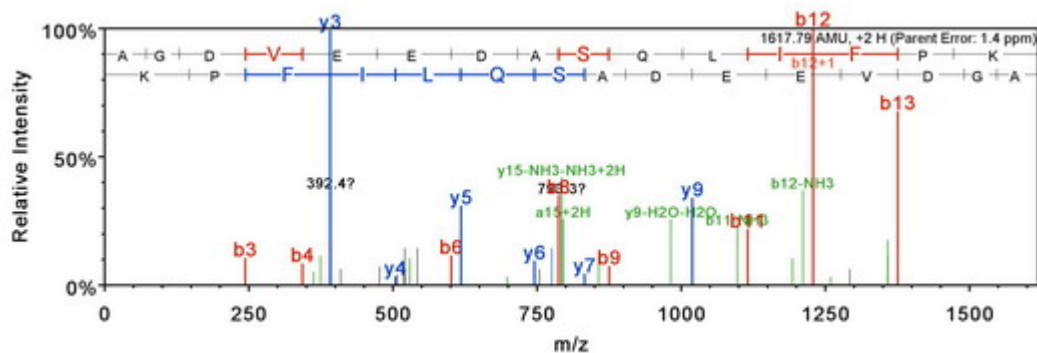

| B  | B Ions | B+2H  | B-NH3  | B-H2O  | AA | Y Ions | Y+2H  | Y-NH3  | Y-H2O  | Y  |
|----|--------|-------|--------|--------|----|--------|-------|--------|--------|----|
| 1  | 72.0   |       |        |        | A  | 1618.8 | 809.9 | 1601.8 | 1600.8 | 15 |
| 2  | 129.1  |       |        |        | G  | 1547.8 | 774.4 | 1530.7 | 1529.8 | 14 |
| 3  | 244.1  |       |        | 226.1  | D  | 1490.7 | 745.9 | 1473.7 | 1472.7 | 13 |
| 4  | 343.2  |       |        | 325.2  | V  | 1375.7 | 688.4 | 1358.7 | 1357.7 | 12 |
| 5  | 472.2  |       |        | 454.2  | E  | 1276.6 | 638.8 | 1259.6 | 1258.6 | 11 |
| 6  | 601.3  | 301.1 |        | 583.2  | E  | 1147.6 | 574.3 | 1130.6 | 1129.6 | 10 |
| 7  | 716.3  | 358.6 |        | 698.3  | D  | 1018.6 | 509.8 | 1001.5 | 1000.6 | 9  |
| 8  | 787.3  | 394.2 |        | 769.3  | A  | 903.5  | 452.3 | 886.5  | 885.5  | 8  |
| 9  | 874.3  | 437.7 |        | 856.3  | S  | 832.5  | 416.8 | 815.5  | 814.5  | 7  |
| 10 | 1002.4 | 501.7 | 985.4  | 984.4  | Q  | 745.5  | 373.2 | 728.4  |        | 6  |
| 11 | 1115.5 | 558.3 | 1098.5 | 1097.5 | L  | 617.4  |       | 600.4  |        | 5  |
| 12 | 1228.6 | 614.8 | 1211.5 | 1210.6 | I  | 504.3  |       | 487.3  |        | 4  |
| 13 | 1375.6 | 688.3 | 1358.6 | 1357.6 | F  | 391.2  |       | 374.2  |        | 3  |
| 14 | 1472.7 | 736.9 | 1455.7 | 1454.7 | P  | 244.2  |       | 227.1  |        | 2  |
| 15 | 1618.8 | 809.9 | 1601.8 | 1600.8 | K  | 147.1  |       | 130.1  |        | 1  |

Gene symbol: Ppp2cb

Protein name: Serine/threonine-protein phosphatase 2A catalytic subunit beta isoform

Protein accession numbers: IPI00111556,IPI00120374,IPI00473972,IPI00751938

Peptide sequence: (R)NVVTIFSAPNYCYR(C)

Exclusive (unique to this protein): TRUE

SEQUEST XCorr score: 2.58 SEQUEST DCn score: 0.508

Fix modifications: C12: Carbamidomethyl (+57.02)Variable modifications: None

charge: 2

Observed m/z: 852.413

Actual minus calculated peptide mass (AMU): -0.003296

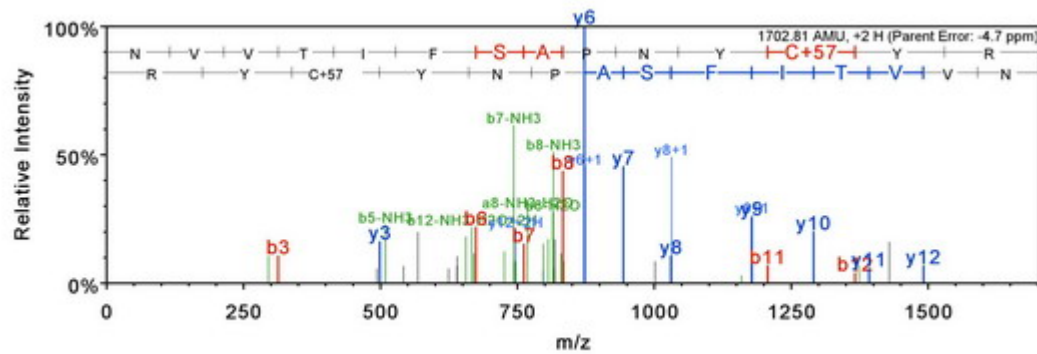

| B  | B Ions | B+2H  | B-NH3  | B-H2O  | AA   | Y Ions | Y+2H  | Y-NH3  | Y-H2O  | Y  |
|----|--------|-------|--------|--------|------|--------|-------|--------|--------|----|
| 1  | 115.1  |       | 98.0   |        | N    | 1703.8 | 852.4 | 1686.8 | 1685.8 | 14 |
| 2  | 214.1  |       | 197.1  |        | V    | 1589.8 | 795.4 | 1572.8 | 1571.8 | 13 |
| 3  | 313.2  |       | 296.2  |        | V    | 1490.7 | 745.9 | 1473.7 | 1472.7 | 12 |
| 4  | 414.2  |       | 397.2  | 396.2  | T    | 1391.6 | 696.3 | 1374.6 | 1373.6 | 11 |
| 5  | 527.3  |       | 510.3  | 509.3  | I    | 1290.6 | 645.8 | 1273.6 | 1272.6 | 10 |
| 6  | 674.4  | 337.7 | 657.4  | 656.4  | F    | 1177.5 | 589.3 | 1160.5 | 1159.5 | 9  |
| 7  | 761.4  | 381.2 | 744.4  | 743.4  | S    | 1030.4 | 515.7 | 1013.4 | 1012.4 | 8  |
| 8  | 832.5  | 416.7 | 815.4  | 814.5  | A    | 943.4  | 472.2 | 926.4  |        | 7  |
| 9  | 929.5  | 465.3 | 912.5  | 911.5  | P    | 872.4  | 436.7 | 855.4  |        | 6  |
| 10 | 1043.5 | 522.3 | 1026.5 | 1025.5 | N    | 775.3  |       | 758.3  |        | 5  |
| 11 | 1206.6 | 603.8 | 1189.6 | 1188.6 | Y    | 661.3  |       | 644.3  |        | 4  |
| 12 | 1366.7 | 683.8 | 1349.6 | 1348.6 | C+57 | 498.2  |       | 481.2  |        | 3  |
| 13 | 1529.7 | 765.4 | 1512.7 | 1511.7 | Y    | 338.2  |       | 321.2  |        | 2  |
| 14 | 1703.8 | 852.4 | 1686.8 | 1685.8 | R    | 175.1  |       | 158.1  |        | 1  |

Gene symbol: Ppp2r1b

Protein name: Adult male testis cDNA, RIKEN full-length enriched library, clone:4933415116  
product:SERINE/THREONINE PROTEIN PHOSPHATASE 2A, 65 kDa REGULATORY SUBUNIT A, BETA ISOFORM (PP2A, SUBUNIT A, PR65-BETA ISOFORM) (PP2A, SUBUNIT A, R1-BETA ISOFORM) homolog

Protein accession numbers: IPI00222306,IPI00655135

Peptide sequence: (R)QLSQSLLPAIVELAEDAK(W)

Exclusive (unique to this protein): TRUE

SEQUEST XCorr score: 2.84 SEQUEST DCn score: 0.578

Fix modifications: None

Variable modifications: None

charge: 2

Observed m/z: 963.0317

Actual minus calculated peptide mass (AMU): -0.0040256

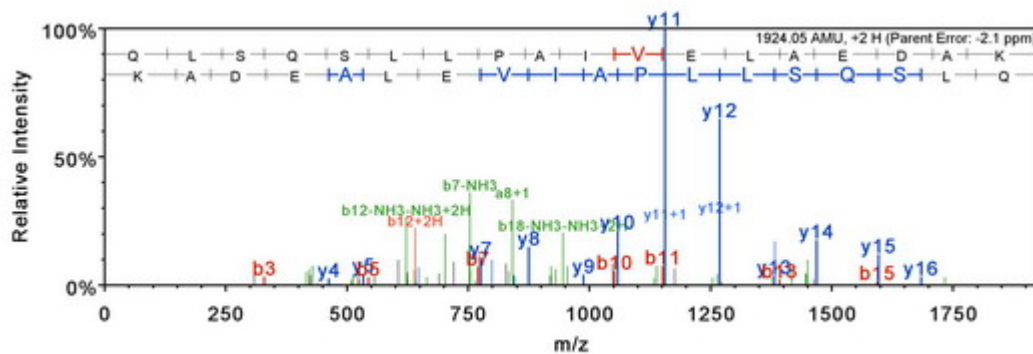



| B  | B Ions | B+2H  | B-NH3  | B-H2O  | AA | Y Ions | Y+2H  | Y-NH3  | Y-H2O  | Y  |
|----|--------|-------|--------|--------|----|--------|-------|--------|--------|----|
| 1  | 129.1  |       | 112.0  |        | Q  | 1925.1 | 963.0 | 1908.0 | 1907.1 | 18 |
| 2  | 242.2  |       | 225.1  |        | L  | 1797.0 | 899.0 | 1780.0 | 1779.0 | 17 |
| 3  | 329.2  |       | 312.2  | 311.2  | S  | 1683.9 | 842.5 | 1666.9 | 1665.9 | 16 |
| 4  | 457.2  |       | 440.2  | 439.2  | Q  | 1596.9 | 799.0 | 1579.9 | 1578.9 | 15 |
| 5  | 544.3  |       | 527.3  | 526.3  | S  | 1468.8 | 734.9 | 1451.8 | 1450.8 | 14 |
| 6  | 657.4  | 329.2 | 640.3  | 639.4  | L  | 1381.8 | 691.4 | 1364.8 | 1363.8 | 13 |
| 7  | 770.4  | 385.7 | 753.4  | 752.4  | L  | 1268.7 | 634.9 | 1251.7 | 1250.7 | 12 |
| 8  | 867.5  | 434.3 | 850.5  | 849.5  | P  | 1155.6 | 578.3 | 1138.6 | 1137.6 | 11 |
| 9  | 938.5  | 469.8 | 921.5  | 920.5  | A  | 1058.6 | 529.8 | 1041.5 | 1040.6 | 10 |
| 10 | 1051.6 | 526.3 | 1034.6 | 1033.6 | I  | 987.5  | 494.3 | 970.5  | 969.5  | 9  |
| 11 | 1150.7 | 575.9 | 1133.7 | 1132.7 | V  | 874.5  | 437.7 | 857.4  | 856.4  | 8  |
| 12 | 1279.7 | 640.4 | 1262.7 | 1261.7 | E  | 775.4  | 388.2 | 758.4  | 757.4  | 7  |
| 13 | 1392.8 | 696.9 | 1375.8 | 1374.8 | L  | 646.3  | 323.7 | 629.3  | 628.3  | 6  |
| 14 | 1463.9 | 732.4 | 1446.8 | 1445.8 | A  | 533.3  |       | 516.2  | 515.3  | 5  |
| 15 | 1592.9 | 797.0 | 1575.9 | 1574.9 | E  | 462.2  |       | 445.2  | 444.2  | 4  |
| 16 | 1707.9 | 854.5 | 1690.9 | 1689.9 | D  | 333.2  |       | 316.2  | 315.2  | 3  |
| 17 | 1779.0 | 890.0 | 1761.9 | 1760.9 | A  | 218.2  |       | 201.1  |        | 2  |
| 18 | 1925.1 | 963.0 | 1908.0 | 1907.1 | K  | 147.1  |       | 130.1  |        | 1  |

Gene symbol: Ppp2r4

Protein name: Serine/threonine-protein phosphatase 2A regulatory subunit B'

Protein accession numbers: IPI00118723

Peptide sequence: (R)WIDETPPVDQPSR(F)

Exclusive (unique to this protein): TRUE

SEQUEST XCorr score: 2.14 SEQUEST DCn score: 0.638

Fix modifications: None

Variable modifications: None

charge: 2

Observed m/z: 770.3733

Actual minus calculated peptide mass (AMU): -0.0059849

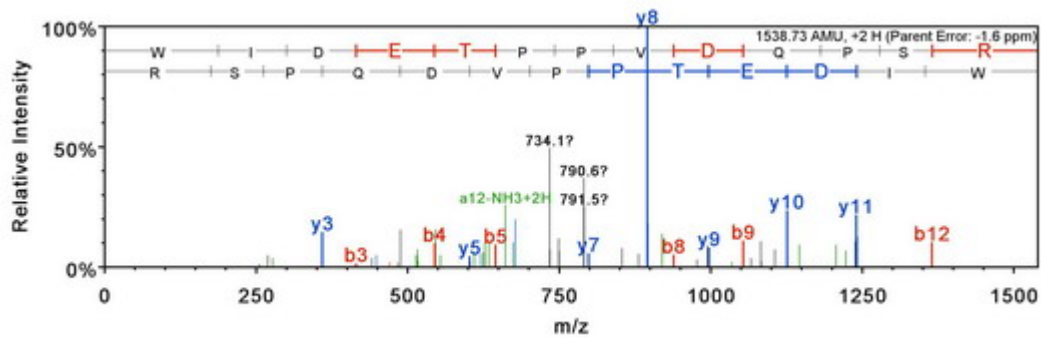

| B  | B Ions | B+2H  | B-NH3  | B-H2O  | AA | Y Ions | Y+2H  | Y-NH3  | Y-H2O  | Y  |
|----|--------|-------|--------|--------|----|--------|-------|--------|--------|----|
| 1  | 187.1  |       |        |        | W  | 1539.7 | 770.4 | 1522.7 | 1521.7 | 13 |
| 2  | 300.2  |       |        |        | I  | 1353.7 | 677.3 | 1336.6 | 1335.7 | 12 |
| 3  | 415.2  |       |        | 397.2  | D  | 1240.6 | 620.8 | 1223.5 | 1222.6 | 11 |
| 4  | 544.2  |       |        | 526.2  | E  | 1125.5 | 563.3 | 1108.5 | 1107.5 | 10 |
| 5  | 645.3  |       |        | 627.3  | T  | 996.5  | 498.8 | 979.5  | 978.5  | 9  |
| 6  | 742.3  | 371.7 |        | 724.3  | P  | 895.5  | 448.2 | 878.4  | 877.5  | 8  |
| 7  | 839.4  | 420.2 |        | 821.4  | P  | 798.4  | 399.7 | 781.4  | 780.4  | 7  |
| 8  | 938.5  | 469.7 |        | 920.5  | V  | 701.4  | 351.2 | 684.3  | 683.4  | 6  |
| 9  | 1053.5 | 527.3 |        | 1035.5 | D  | 602.3  |       | 585.3  | 584.3  | 5  |
| 10 | 1181.5 | 591.3 | 1164.5 | 1163.5 | Q  | 487.3  |       | 470.2  | 469.3  | 4  |
| 11 | 1278.6 | 639.8 | 1261.6 | 1260.6 | P  | 359.2  |       | 342.2  | 341.2  | 3  |
| 12 | 1365.6 | 683.3 | 1348.6 | 1347.6 | S  | 262.1  |       | 245.1  | 244.1  | 2  |
| 13 | 1539.7 | 770.4 | 1522.7 | 1521.7 | R  | 175.1  |       | 158.1  |        | 1  |

Gene symbol: Prei3

Protein name: Preimplantation protein 3

Protein accession numbers: IPI00420832

Peptide sequence: (R)QIFDEYENETFLCHR(F)

Exclusive (unique to this protein): TRUE

SEQUEST XCorr score: 2.06 SEQUEST DCn score: 0.593

Fix modifications: C13: Carbamidomethyl (+57.02) Variable modifications: None

charge: 2

Observed m/z: 1000.9418

Actual minus calculated peptide mass (AMU): -0.005737

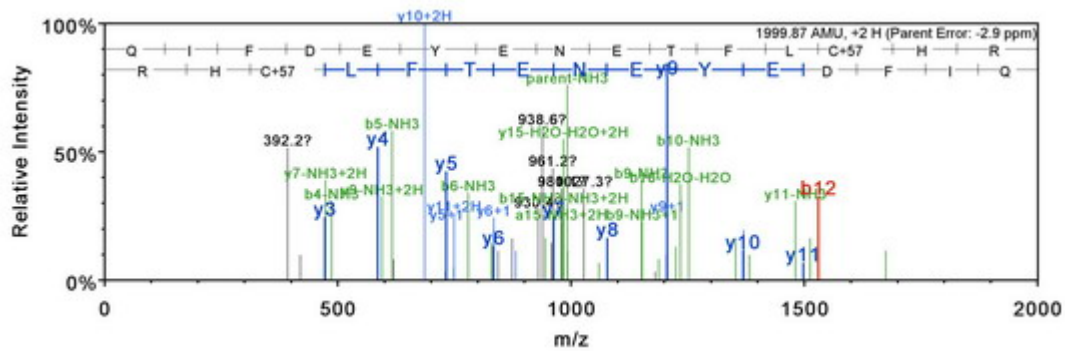

| B  | B Ions | B+2H   | B-NH3  | B-H2O  | AA   | Y Ions | Y+2H   | Y-NH3  | Y-H2O  | Y  |
|----|--------|--------|--------|--------|------|--------|--------|--------|--------|----|
| 1  | 129.1  |        | 112.0  |        | Q    | 2000.9 | 1000.9 | 1983.9 | 1982.9 | 15 |
| 2  | 242.2  |        | 225.1  |        | I    | 1872.8 | 936.9  | 1855.8 | 1854.8 | 14 |
| 3  | 389.2  |        | 372.2  |        | F    | 1759.7 | 880.4  | 1742.7 | 1741.7 | 13 |
| 4  | 504.3  |        | 487.2  | 486.2  | D    | 1612.7 | 806.8  | 1595.6 | 1594.7 | 12 |
| 5  | 633.3  |        | 616.3  | 615.3  | E    | 1497.6 | 749.3  | 1480.6 | 1479.6 | 11 |
| 6  | 796.4  | 398.7  | 779.3  | 778.3  | Y    | 1368.6 | 684.8  | 1351.6 | 1350.6 | 10 |
| 7  | 925.4  | 463.2  | 908.4  | 907.4  | E    | 1205.5 | 603.3  | 1188.5 | 1187.5 | 9  |
| 8  | 1039.4 | 520.2  | 1022.4 | 1021.4 | N    | 1076.5 | 538.8  | 1059.5 | 1058.5 | 8  |
| 9  | 1168.5 | 584.7  | 1151.5 | 1150.5 | E    | 962.5  | 481.7  | 945.4  | 944.4  | 7  |
| 10 | 1269.5 | 635.3  | 1252.5 | 1251.5 | T    | 833.4  | 417.2  | 816.4  | 815.4  | 6  |
| 11 | 1416.6 | 708.8  | 1399.6 | 1398.6 | F    | 732.4  | 366.7  | 715.3  |        | 5  |
| 12 | 1529.7 | 765.3  | 1512.7 | 1511.7 | L    | 585.3  | 293.2  | 568.3  |        | 4  |
| 13 | 1689.7 | 845.4  | 1672.7 | 1671.7 | C+57 | 472.2  | 236.6  | 455.2  |        | 3  |
| 14 | 1826.8 | 913.9  | 1809.7 | 1808.8 | H    | 312.2  | 156.6  | 295.2  |        | 2  |
| 15 | 2000.9 | 1000.9 | 1983.9 | 1982.9 | R    | 175.1  |        | 158.1  |        | 1  |

Gene symbol: Prss1

Protein name: Trypsinogen 16

Protein accession numbers: IPI00130391

Peptide sequence: (R)LGEHNINVLEGEINLEQFIDAAK(I)

Exclusive (unique to this protein): TRUE

SEQUEST XCorr score: 2.03 SEQUEST DCn score: 0.356

Fix modifications: None

Variable modifications: None

charge: 2

Observed m/z: 1106.0525

Actual minus calculated peptide mass (AMU): -0.007324

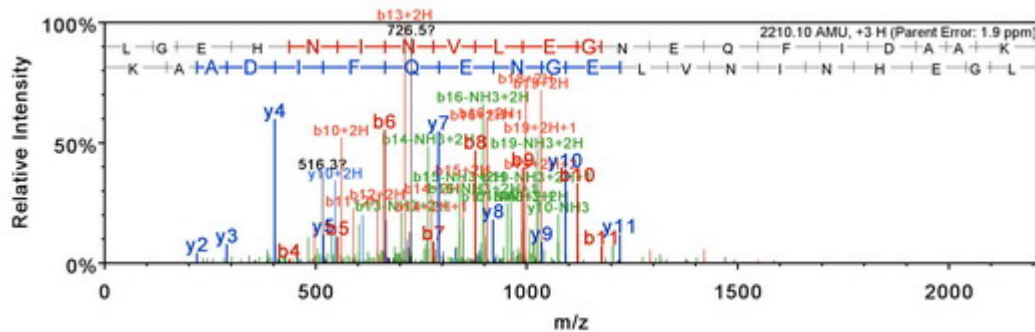

| B  | B Ions | B+2H   | B-NH3  | B-H2O  | AA | Y Ions | Y+2H   | Y-NH3  | Y-H2O  | Y  |
|----|--------|--------|--------|--------|----|--------|--------|--------|--------|----|
| 1  | 114.1  |        |        |        | L  | 2211.1 | 1106.1 | 2194.1 | 2193.1 | 20 |
| 2  | 171.1  |        |        |        | G  | 2098.0 | 1049.5 | 2081.0 | 2080.0 | 19 |
| 3  | 300.2  |        |        | 282.2  | E  | 2041.0 | 1021.0 | 2024.0 | 2023.0 | 18 |
| 4  | 437.2  | 219.1  |        | 419.2  | H  | 1912.0 | 956.5  | 1894.9 | 1894.0 | 17 |
| 5  | 551.3  | 276.1  | 534.2  | 533.3  | N  | 1774.9 | 888.0  | 1757.9 | 1756.9 | 16 |
| 6  | 664.3  | 332.7  | 647.3  | 646.3  | I  | 1660.9 | 830.9  | 1643.8 | 1642.8 | 15 |
| 7  | 778.4  | 389.7  | 761.4  | 760.4  | N  | 1547.8 | 774.4  | 1530.7 | 1529.8 | 14 |
| 8  | 877.5  | 439.2  | 860.4  | 859.4  | V  | 1433.7 | 717.4  | 1416.7 | 1415.7 | 13 |
| 9  | 990.5  | 495.8  | 973.5  | 972.5  | L  | 1334.7 | 667.8  | 1317.6 | 1316.7 | 12 |
| 10 | 1119.6 | 560.3  | 1102.5 | 1101.6 | E  | 1221.6 | 611.3  | 1204.5 | 1203.6 | 11 |
| 11 | 1176.6 | 588.8  | 1159.6 | 1158.6 | G  | 1092.5 | 546.8  | 1075.5 | 1074.5 | 10 |
| 12 | 1290.6 | 645.8  | 1273.6 | 1272.6 | N  | 1035.5 | 518.3  | 1018.5 | 1017.5 | 9  |
| 13 | 1419.7 | 710.4  | 1402.7 | 1401.7 | E  | 921.5  | 461.2  | 904.4  | 903.5  | 8  |
| 14 | 1547.8 | 774.4  | 1530.7 | 1529.7 | Q  | 792.4  | 396.7  | 775.4  | 774.4  | 7  |
| 15 | 1694.8 | 847.9  | 1677.8 | 1676.8 | F  | 664.4  | 332.7  | 647.3  | 646.4  | 6  |
| 16 | 1807.9 | 904.5  | 1790.9 | 1789.9 | I  | 517.3  |        | 500.3  | 499.3  | 5  |
| 17 | 1922.9 | 962.0  | 1905.9 | 1904.9 | D  | 404.2  |        | 387.2  | 386.2  | 4  |
| 18 | 1994.0 | 997.5  | 1976.9 | 1976.0 | A  | 289.2  |        | 272.2  |        | 3  |
| 19 | 2065.0 | 1033.0 | 2048.0 | 2047.0 | A  | 218.2  |        | 201.1  |        | 2  |
| 20 | 2211.1 | 1106.1 | 2194.1 | 2193.1 | K  | 147.1  |        | 130.1  |        | 1  |

Gene symbol: Psen1

Protein name: Isoform 1 of Presenilin-1

Protein accession numbers: IPI00117124

Peptide sequence: (R)AAVQELSGSILTSEDPEER(G)

Exclusive (unique to this protein): TRUE

SEQUEST XCorr score: 2.49 SEQUEST DCn score: 0.689

Fix modifications: None

Variable modifications: None

charge: 2

Observed m/z: 1016.0005

Actual minus calculated peptide mass (AMU): 0.004883

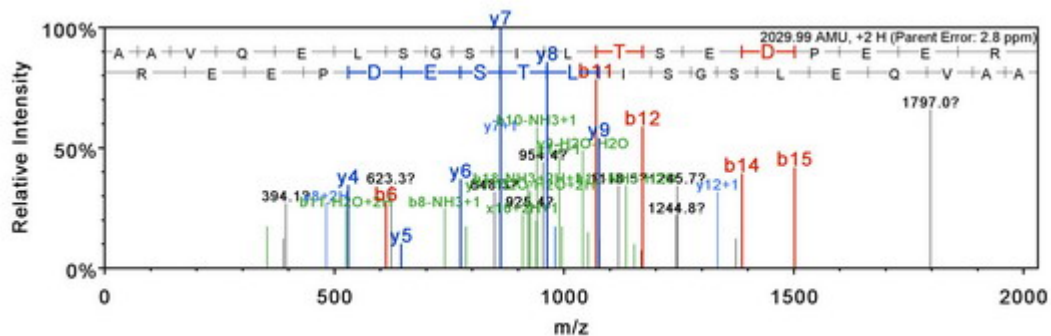

| B  | B Ions | B+2H   | B-NH3  | B-H2O  | AA | Y Ions | Y+2H   | Y-NH3  | Y-H2O  | Y  |
|----|--------|--------|--------|--------|----|--------|--------|--------|--------|----|
| 1  | 72.0   |        |        |        | A  | 2031.0 | 1016.0 | 2014.0 | 2013.0 | 19 |
| 2  | 143.1  |        |        |        | A  | 1960.0 | 980.5  | 1942.9 | 1941.9 | 18 |
| 3  | 242.2  |        |        |        | V  | 1888.9 | 945.0  | 1871.9 | 1870.9 | 17 |
| 4  | 370.2  |        | 353.2  |        | Q  | 1789.9 | 895.4  | 1772.8 | 1771.8 | 16 |
| 5  | 499.3  |        | 482.2  | 481.2  | E  | 1661.8 | 831.4  | 1644.8 | 1643.8 | 15 |
| 6  | 612.3  | 306.7  | 595.3  | 594.3  | L  | 1532.7 | 766.9  | 1515.7 | 1514.7 | 14 |
| 7  | 699.4  | 350.2  | 682.3  | 681.4  | S  | 1419.7 | 710.3  | 1402.6 | 1401.7 | 13 |
| 8  | 756.4  | 378.7  | 739.4  | 738.4  | G  | 1332.6 | 666.8  | 1315.6 | 1314.6 | 12 |
| 9  | 843.4  | 422.2  | 826.4  | 825.4  | S  | 1275.6 | 638.3  | 1258.6 | 1257.6 | 11 |
| 10 | 956.5  | 478.8  | 939.5  | 938.5  | I  | 1188.6 | 594.8  | 1171.5 | 1170.6 | 10 |
| 11 | 1069.6 | 535.3  | 1052.6 | 1051.6 | L  | 1075.5 | 538.3  | 1058.5 | 1057.5 | 9  |
| 12 | 1170.6 | 585.8  | 1153.6 | 1152.6 | T  | 962.4  | 481.7  | 945.4  | 944.4  | 8  |
| 13 | 1257.7 | 629.3  | 1240.6 | 1239.7 | S  | 861.4  | 431.2  | 844.3  | 843.4  | 7  |
| 14 | 1386.7 | 693.9  | 1369.7 | 1368.7 | E  | 774.3  | 387.7  | 757.3  | 756.3  | 6  |
| 15 | 1501.7 | 751.4  | 1484.7 | 1483.7 | D  | 645.3  |        | 628.3  | 627.3  | 5  |
| 16 | 1598.8 | 799.9  | 1581.8 | 1580.8 | P  | 530.3  |        | 513.2  | 512.3  | 4  |
| 17 | 1727.8 | 864.4  | 1710.8 | 1709.8 | E  | 433.2  |        | 416.2  | 415.2  | 3  |
| 18 | 1856.9 | 928.9  | 1839.9 | 1838.9 | E  | 304.2  |        | 287.1  | 286.2  | 2  |
| 19 | 2031.0 | 1016.0 | 2014.0 | 2013.0 | R  | 175.1  |        | 158.1  |        | 1  |

Gene symbol: Psma1

Protein name: Proteasome subunit alpha type 1

Protein accession numbers: IPI00283862

Peptide sequence: (R)NQYDNDVTWSPQGR(I)

Exclusive (unique to this protein): TRUE

SEQUEST XCorr score: 2.23 SEQUEST DCn score: 0.646

Fix modifications: None

Variable modifications: None

charge: 2

Observed m/z: 889.9113

Actual minus calculated peptide mass (AMU): 0.004883

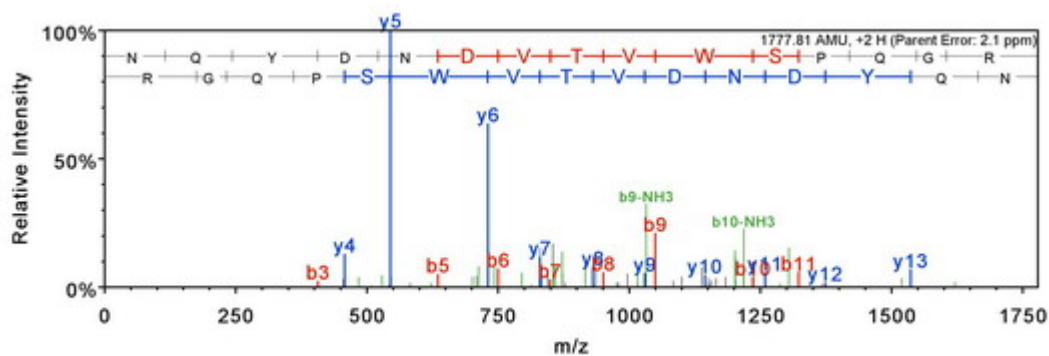

| B  | B Ions | B+2H  | B-NH3  | B-H2O  | AA | Y Ions | Y+2H  | Y-NH3  | Y-H2O  | Y  |
|----|--------|-------|--------|--------|----|--------|-------|--------|--------|----|
| 1  | 115.1  |       | 98.0   |        | N  | 1778.8 | 889.9 | 1761.8 | 1760.8 | 15 |
| 2  | 243.1  |       | 226.1  |        | Q  | 1664.8 | 832.9 | 1647.7 | 1646.8 | 14 |
| 3  | 406.2  |       | 389.2  |        | Y  | 1536.7 | 768.9 | 1519.7 | 1518.7 | 13 |
| 4  | 521.2  |       | 504.2  | 503.2  | D  | 1373.6 | 687.3 | 1356.6 | 1355.6 | 12 |
| 5  | 635.2  |       | 618.2  | 617.2  | N  | 1258.6 | 629.8 | 1241.6 | 1240.6 | 11 |
| 6  | 750.3  | 375.6 | 733.2  | 732.3  | D  | 1144.6 | 572.8 | 1127.5 | 1126.6 | 10 |
| 7  | 849.3  | 425.2 | 832.3  | 831.3  | V  | 1029.5 | 515.3 | 1012.5 | 1011.5 | 9  |
| 8  | 950.4  | 475.7 | 933.4  | 932.4  | T  | 930.5  | 465.7 | 913.5  | 912.5  | 8  |
| 9  | 1049.5 | 525.2 | 1032.4 | 1031.4 | V  | 829.4  | 415.2 | 812.4  | 811.4  | 7  |
| 10 | 1235.5 | 618.3 | 1218.5 | 1217.5 | W  | 730.4  | 365.7 | 713.3  | 712.4  | 6  |
| 11 | 1322.6 | 661.8 | 1305.5 | 1304.5 | S  | 544.3  |       | 527.3  | 526.3  | 5  |
| 12 | 1419.6 | 710.3 | 1402.6 | 1401.6 | P  | 457.3  |       | 440.2  |        | 4  |
| 13 | 1547.7 | 774.3 | 1530.7 | 1529.7 | Q  | 360.2  |       | 343.2  |        | 3  |
| 14 | 1604.7 | 802.9 | 1587.7 | 1586.7 | G  | 232.1  |       | 215.1  |        | 2  |
| 15 | 1778.8 | 889.9 | 1761.8 | 1760.8 | R  | 175.1  |       | 158.1  |        | 1  |

Gene symbol: Psma2

Protein name: In vitro fertilized eggs cDNA, RIKEN full-length enriched library, clone:7420458H06 product:proteasome (prosome, macropain) subunit, alpha type 2, full insert sequence

Protein accession numbers: IPI00420745

Peptide sequence: (K)LAQQYYLVYQEPIPTAQLVQR(V)

Exclusive (unique to this protein): TRUE

SEQUEST XCorr score: 2.59 SEQUEST DCn score: 0.773

Fix modifications: None

Variable modifications: None

charge: 2

Observed m/z: 1261.1738

Actual minus calculated peptide mass (AMU): -0.005859

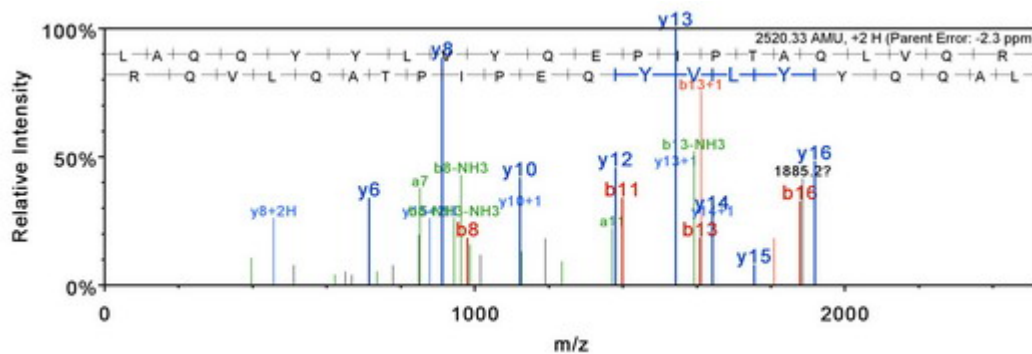

| B  | B Ions | B+2H   | B-NH3  | B-H2O  | AA | Y Ions | Y+2H   | Y-NH3  | Y-H2O  | Y  |
|----|--------|--------|--------|--------|----|--------|--------|--------|--------|----|
| 1  | 114.1  |        |        |        | L  | 2521.3 | 1261.2 | 2504.3 | 2503.3 | 21 |
| 2  | 185.1  |        |        |        | A  | 2408.3 | 1204.6 | 2391.2 | 2390.3 | 20 |
| 3  | 313.2  |        | 296.2  |        | Q  | 2337.2 | 1169.1 | 2320.2 | 2319.2 | 19 |
| 4  | 441.3  |        | 424.2  |        | Q  | 2209.2 | 1105.1 | 2192.1 | 2191.2 | 18 |
| 5  | 604.3  |        | 587.3  |        | Y  | 2081.1 | 1041.1 | 2064.1 | 2063.1 | 17 |
| 6  | 767.4  | 384.2  | 750.4  |        | Y  | 1918.0 | 959.5  | 1901.0 | 1900.0 | 16 |
| 7  | 880.5  | 440.7  | 863.4  |        | L  | 1755.0 | 878.0  | 1738.0 | 1737.0 | 15 |
| 8  | 979.5  | 490.3  | 962.5  |        | V  | 1641.9 | 821.5  | 1624.9 | 1623.9 | 14 |
| 9  | 1142.6 | 571.8  | 1125.6 |        | Y  | 1542.8 | 771.9  | 1525.8 | 1524.8 | 13 |
| 10 | 1270.7 | 635.8  | 1253.6 |        | Q  | 1379.8 | 690.4  | 1362.7 | 1361.8 | 12 |
| 11 | 1399.7 | 700.4  | 1382.7 | 1381.7 | E  | 1251.7 | 626.4  | 1234.7 | 1233.7 | 11 |
| 12 | 1496.7 | 748.9  | 1479.7 | 1478.7 | P  | 1122.7 | 561.8  | 1105.6 | 1104.7 | 10 |
| 13 | 1609.8 | 805.4  | 1592.8 | 1591.8 | I  | 1025.6 | 513.3  | 1008.6 | 1007.6 | 9  |
| 14 | 1706.9 | 853.9  | 1689.9 | 1688.9 | P  | 912.5  | 456.8  | 895.5  | 894.5  | 8  |
| 15 | 1807.9 | 904.5  | 1790.9 | 1789.9 | T  | 815.5  | 408.2  | 798.5  | 797.5  | 7  |
| 16 | 1879.0 | 940.0  | 1861.9 | 1861.0 | A  | 714.4  | 357.7  | 697.4  |        | 6  |
| 17 | 2007.0 | 1004.0 | 1990.0 | 1989.0 | Q  | 643.4  |        | 626.4  |        | 5  |
| 18 | 2120.1 | 1060.6 | 2103.1 | 2102.1 | L  | 515.3  |        | 498.3  |        | 4  |
| 19 | 2219.2 | 1110.1 | 2202.2 | 2201.2 | V  | 402.3  |        | 385.2  |        | 3  |
| 20 | 2347.2 | 1174.1 | 2330.2 | 2329.2 | Q  | 303.2  |        | 286.2  |        | 2  |
| 21 | 2521.3 | 1261.2 | 2504.3 | 2503.3 | R  | 175.1  |        | 158.1  |        | 1  |

Gene symbol: Psma4

Protein name: Proteasome subunit alpha type 4

Protein accession numbers: IPI00277001

Peptide sequence: (K)LLDEVFFSEK(I)

Exclusive (unique to this protein): TRUE

SEQUEST XCorr score: 2.08 SEQUEST DCn score: 0.543

Fix modifications: None

Variable modifications: None

charge: 2

Observed m/z: 613.8148

Actual minus calculated peptide mass (AMU): -0.0092755

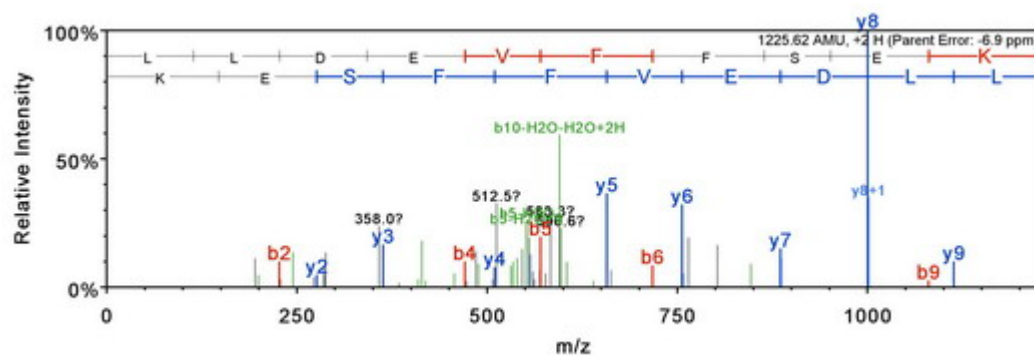

| B  | B ions | B+2H  | B-NH3  | B-H2O  | AA | Y ions | Y+2H  | Y-NH3  | Y-H2O  | Y  |
|----|--------|-------|--------|--------|----|--------|-------|--------|--------|----|
| 1  | 114.1  |       |        |        | L  | 1226.6 | 613.8 | 1209.6 | 1208.6 | 10 |
| 2  | 227.2  |       |        |        | L  | 1113.5 | 557.3 | 1096.5 | 1095.5 | 9  |
| 3  | 342.2  |       |        | 324.2  | D  | 1000.5 | 500.7 | 983.4  | 982.5  | 8  |
| 4  | 471.3  |       |        | 453.2  | E  | 885.4  | 443.2 | 868.4  | 867.4  | 7  |
| 5  | 570.3  |       |        | 552.3  | V  | 756.4  | 378.7 | 739.4  | 738.4  | 6  |
| 6  | 717.4  | 359.2 |        | 699.4  | F  | 657.3  |       | 640.3  | 639.3  | 5  |
| 7  | 864.5  | 432.7 |        | 846.4  | F  | 510.3  |       | 493.2  | 492.3  | 4  |
| 8  | 951.5  | 476.3 |        | 933.5  | S  | 363.2  |       | 346.2  | 345.2  | 3  |
| 9  | 1080.5 | 540.8 |        | 1062.5 | E  | 276.2  |       | 259.1  | 258.1  | 2  |
| 10 | 1226.6 | 613.8 | 1209.6 | 1208.6 | K  | 147.1  |       | 130.1  |        | 1  |

Gene symbol: Psmb1

Protein name: Proteasome subunit beta type 1 precursor

Protein accession numbers: IPI00113845

Peptide sequence: (K)GAVYSFDPVGSYQR(D)

Exclusive (unique to this protein): TRUE

SEQUEST XCorr score: 2.73 SEQUEST DCn score: 0.563

Fix modifications: None

Variable modifications: None

charge: 2

Observed m/z: 773.3669

Actual minus calculated peptide mass (AMU): -0.00769

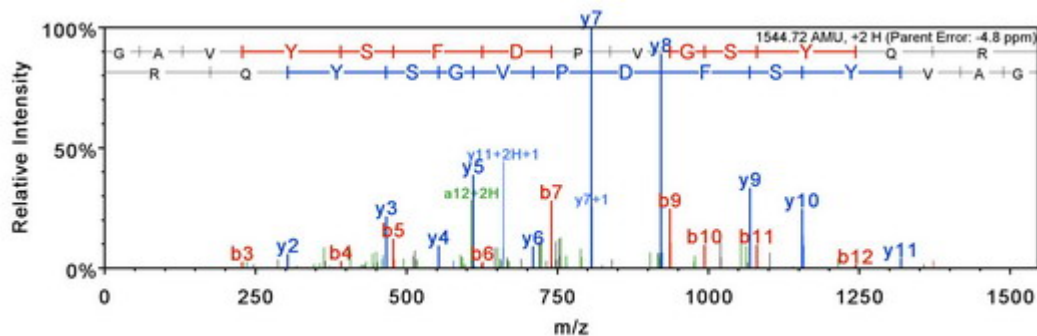

| B  | B ions | B+2H  | B-NH3  | B-H2O  | AA | Y ions | Y+2H  | Y-NH3  | Y-H2O  | Y  |
|----|--------|-------|--------|--------|----|--------|-------|--------|--------|----|
| 1  | 58.0   |       |        |        | G  | 1545.7 | 773.4 | 1528.7 | 1527.7 | 14 |
| 2  | 129.1  |       |        |        | A  | 1488.7 | 744.9 | 1471.7 | 1470.7 | 13 |
| 3  | 228.1  |       |        |        | V  | 1417.7 | 709.3 | 1400.7 | 1399.7 | 12 |
| 4  | 391.2  |       |        |        | Y  | 1318.6 | 659.8 | 1301.6 | 1300.6 | 11 |
| 5  | 478.2  |       |        | 460.2  | S  | 1155.5 | 578.3 | 1138.5 | 1137.5 | 10 |
| 6  | 625.3  | 313.2 |        | 607.3  | F  | 1068.5 | 534.8 | 1051.5 | 1050.5 | 9  |
| 7  | 740.3  | 370.7 |        | 722.3  | D  | 921.4  | 461.2 | 904.4  | 903.4  | 8  |
| 8  | 837.4  | 419.2 |        | 819.4  | P  | 806.4  | 403.7 | 789.4  | 788.4  | 7  |
| 9  | 936.5  | 468.7 |        | 918.4  | V  | 709.4  | 355.2 | 692.3  | 691.4  | 6  |
| 10 | 993.5  | 497.2 |        | 975.5  | G  | 610.3  |       | 593.3  | 592.3  | 5  |
| 11 | 1080.5 | 540.8 |        | 1062.5 | S  | 553.3  |       | 536.3  | 535.3  | 4  |
| 12 | 1243.6 | 622.3 |        | 1225.5 | Y  | 466.2  |       | 449.2  |        | 3  |
| 13 | 1371.6 | 686.3 | 1354.6 | 1353.6 | Q  | 303.2  |       | 286.2  |        | 2  |
| 14 | 1545.7 | 773.4 | 1528.7 | 1527.7 | R  | 175.1  |       | 158.1  |        | 1  |



Gene symbol: Psmc6  
 Protein name: 26S protease regulatory subunit S10B  
 Protein accession numbers: IPI00125971  
 Peptide sequence: (K)ALQSVGQIVGEVLK(Q)  
 Exclusive (unique to this protein): TRUE  
 SEQUEST XCorr score: 2.37 SEQUEST DCn score: 0.518  
 Fix modifications: None  
 Variable modifications: None  
 charge: 2 Observed m/z: 720.9257  
 Actual minus calculated peptide mass (AMU): 0.0008545

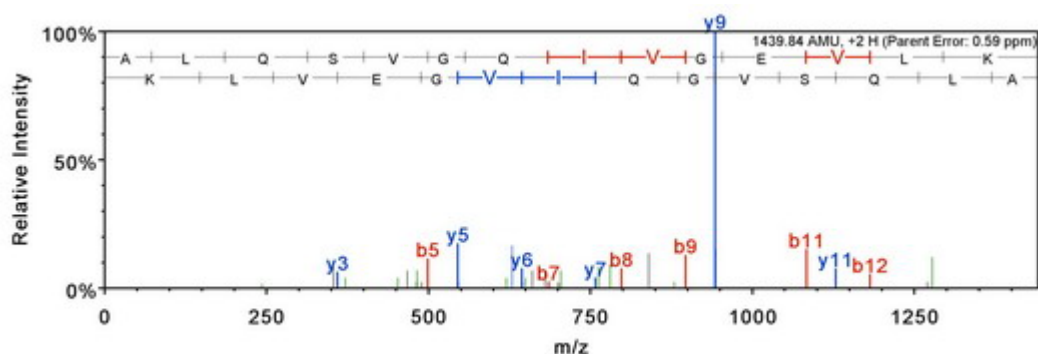

| B  | B ions | B+2H  | B-NH3  | B-H2O  | AA | Y ions | Y+2H  | Y-NH3  | Y-H2O  | Y  |
|----|--------|-------|--------|--------|----|--------|-------|--------|--------|----|
| 1  | 72.0   |       |        |        | A  | 1440.8 | 720.9 | 1423.8 | 1422.8 | 14 |
| 2  | 185.1  |       |        |        | L  | 1369.8 | 685.4 | 1352.8 | 1351.8 | 13 |
| 3  | 313.2  |       | 296.2  |        | Q  | 1256.7 | 628.9 | 1239.7 | 1238.7 | 12 |
| 4  | 400.2  |       | 383.2  | 382.2  | S  | 1128.7 | 564.8 | 1111.6 | 1110.7 | 11 |
| 5  | 499.3  |       | 482.3  | 481.3  | V  | 1041.6 | 521.3 | 1024.6 | 1023.6 | 10 |
| 6  | 556.3  | 278.7 | 539.3  | 538.3  | G  | 942.6  | 471.8 | 925.5  | 924.6  | 9  |
| 7  | 684.4  | 342.7 | 667.3  | 666.4  | Q  | 885.5  | 443.3 | 868.5  | 867.5  | 8  |
| 8  | 797.5  | 399.2 | 780.4  | 779.4  | I  | 757.5  | 379.3 | 740.5  | 739.5  | 7  |
| 9  | 896.5  | 448.8 | 879.5  | 878.5  | V  | 644.4  | 322.7 | 627.4  | 626.4  | 6  |
| 10 | 953.5  | 477.3 | 936.5  | 935.5  | G  | 545.3  |       | 528.3  | 527.3  | 5  |
| 11 | 1082.6 | 541.8 | 1065.6 | 1064.6 | E  | 488.3  |       | 471.3  | 470.3  | 4  |
| 12 | 1181.7 | 591.3 | 1164.6 | 1163.6 | V  | 359.3  |       | 342.2  |        | 3  |
| 13 | 1294.7 | 647.9 | 1277.7 | 1276.7 | L  | 260.2  |       | 243.2  |        | 2  |
| 14 | 1440.8 | 720.9 | 1423.8 | 1422.8 | K  | 147.1  |       | 130.1  |        | 1  |

Gene symbol: Psme3  
 Protein name: Proteasome activator complex subunit 3  
 Protein accession numbers: IPI00113660,IPI00649191  
 Peptide sequence: (R)TVESEAASYLDQISR(Y)  
 Exclusive (unique to this protein): TRUE  
 SEQUEST XCorr score: 2.05 SEQUEST DCn score: 0.331  
 Fix modifications: None  
 Variable modifications: None  
 charge: 2 Observed m/z: 834.9106  
 Actual minus calculated peptide mass (AMU): 0.005493

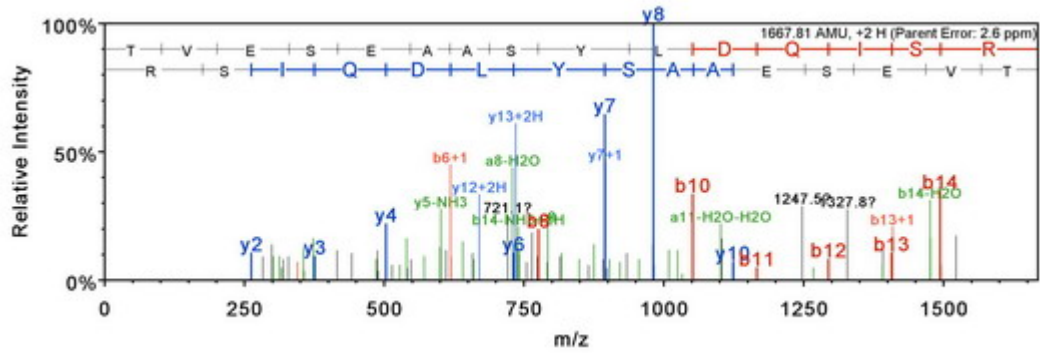

| B  | B ions | B+2H  | B-NH3  | B-H2O  | AA | Y ions | Y+2H  | Y-NH3  | Y-H2O  | Y  |
|----|--------|-------|--------|--------|----|--------|-------|--------|--------|----|
| 1  | 102.1  |       |        | 84.0   | T  | 1668.8 | 834.9 | 1651.8 | 1650.8 | 15 |
| 2  | 201.1  |       |        | 183.1  | V  | 1567.8 | 784.4 | 1550.7 | 1549.8 | 14 |
| 3  | 330.2  |       |        | 312.2  | E  | 1468.7 | 734.9 | 1451.7 | 1450.7 | 13 |
| 4  | 417.2  |       |        | 399.2  | S  | 1339.7 | 670.3 | 1322.6 | 1321.6 | 12 |
| 5  | 546.2  |       |        | 528.2  | E  | 1252.6 | 626.8 | 1235.6 | 1234.6 | 11 |
| 6  | 617.3  | 309.1 |        | 599.3  | A  | 1123.6 | 562.3 | 1106.5 | 1105.6 | 10 |
| 7  | 688.3  | 344.7 |        | 670.3  | A  | 1052.5 | 526.8 | 1035.5 | 1034.5 | 9  |
| 8  | 775.4  | 388.2 |        | 757.3  | S  | 981.5  | 491.3 | 964.5  | 963.5  | 8  |
| 9  | 938.4  | 469.7 |        | 920.4  | Y  | 894.5  | 447.7 | 877.4  | 876.5  | 7  |
| 10 | 1051.5 | 526.3 |        | 1033.5 | L  | 731.4  | 366.2 | 714.4  | 713.4  | 6  |
| 11 | 1166.5 | 583.8 |        | 1148.5 | D  | 618.3  |       | 601.3  | 600.3  | 5  |
| 12 | 1294.6 | 647.8 | 1277.5 | 1276.6 | Q  | 503.3  |       | 486.3  | 485.3  | 4  |
| 13 | 1407.7 | 704.3 | 1390.6 | 1389.7 | I  | 375.2  |       | 358.2  | 357.2  | 3  |
| 14 | 1494.7 | 747.9 | 1477.7 | 1476.7 | S  | 262.1  |       | 245.1  | 244.1  | 2  |
| 15 | 1668.8 | 834.9 | 1651.8 | 1650.8 | R  | 175.1  |       | 158.1  |        | 1  |

Gene symbol: Pycrl

Protein name: pyrroline-5-carboxylate reductase-like

Protein accession numbers: IPI00153234

Peptide sequence: (R)TDVLTPTAGTTHGLHALER(G)

Exclusive (unique to this protein): TRUE

SEQUEST XCorr score: 2.24 SEQUEST DCn score: 0.479

Fix modifications: None

Variable modifications: None

charge: 2

Observed m/z: 1001.5414

Actual minus calculated peptide mass (AMU): 0.002319

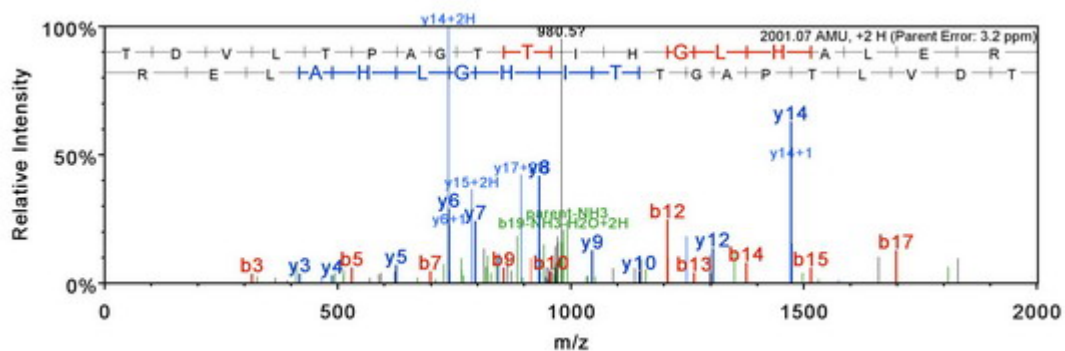

| B  | B Ions | B+2H   | B-NH3  | B-H2O  | AA | Y Ions | Y+2H   | Y-NH3  | Y-H2O  | Y  |
|----|--------|--------|--------|--------|----|--------|--------|--------|--------|----|
| 1  | 102.1  |        |        | 84.0   | T  | 2002.1 | 1001.5 | 1985.1 | 1984.1 | 19 |
| 2  | 217.1  |        |        | 199.1  | D  | 1901.0 | 951.0  | 1884.0 | 1883.0 | 18 |
| 3  | 316.2  |        |        | 298.1  | V  | 1786.0 | 893.5  | 1769.0 | 1768.0 | 17 |
| 4  | 429.2  |        |        | 411.2  | L  | 1686.9 | 844.0  | 1669.9 | 1668.9 | 16 |
| 5  | 530.3  |        |        | 512.3  | T  | 1573.9 | 787.4  | 1556.8 | 1555.8 | 15 |
| 6  | 627.3  | 314.2  |        | 609.3  | P  | 1472.8 | 736.9  | 1455.8 | 1454.8 | 14 |
| 7  | 698.4  | 349.7  |        | 680.4  | A  | 1375.7 | 688.4  | 1358.7 | 1357.7 | 13 |
| 8  | 755.4  | 378.2  |        | 737.4  | G  | 1304.7 | 652.9  | 1287.7 | 1286.7 | 12 |
| 9  | 856.4  | 428.7  |        | 838.4  | T  | 1247.7 | 624.4  | 1230.7 | 1229.7 | 11 |
| 10 | 957.5  | 479.3  |        | 939.5  | T  | 1146.6 | 573.8  | 1129.6 | 1128.6 | 10 |
| 11 | 1070.6 | 535.8  |        | 1052.6 | I  | 1045.6 | 523.3  | 1028.6 | 1027.6 | 9  |
| 12 | 1207.6 | 604.3  |        | 1189.6 | H  | 932.5  | 466.8  | 915.5  | 914.5  | 8  |
| 13 | 1264.7 | 632.8  |        | 1246.6 | G  | 795.5  | 398.2  | 778.4  | 777.4  | 7  |
| 14 | 1377.7 | 689.4  |        | 1359.7 | L  | 738.4  | 369.7  | 721.4  | 720.4  | 6  |
| 15 | 1514.8 | 757.9  |        | 1496.8 | H  | 625.3  | 313.2  | 608.3  | 607.3  | 5  |
| 16 | 1585.8 | 793.4  |        | 1567.8 | A  | 488.3  |        | 471.3  | 470.3  | 4  |
| 17 | 1698.9 | 850.0  |        | 1680.9 | L  | 417.3  |        | 400.2  | 399.2  | 3  |
| 18 | 1828.0 | 914.5  |        | 1810.0 | E  | 304.2  |        | 287.1  | 286.2  | 2  |
| 19 | 2002.1 | 1001.5 | 1985.1 | 1984.1 | R  | 175.1  |        | 158.1  |        | 1  |

Gene symbol: Qdpr

Protein name: Dihydropteridine reductase

Protein accession numbers: IPI00459279

Peptide sequence: (K)MTDSFTEQADQVTADV GK(L)

Exclusive (unique to this protein): TRUE

SEQUEST XCorr score: 2.29 SEQUEST DCn score: 0.619

Fix modifications: None

Variable modifications: None

charge: 2

Observed m/z: 971.9413

Actual minus calculated peptide mass (AMU): 0.00415

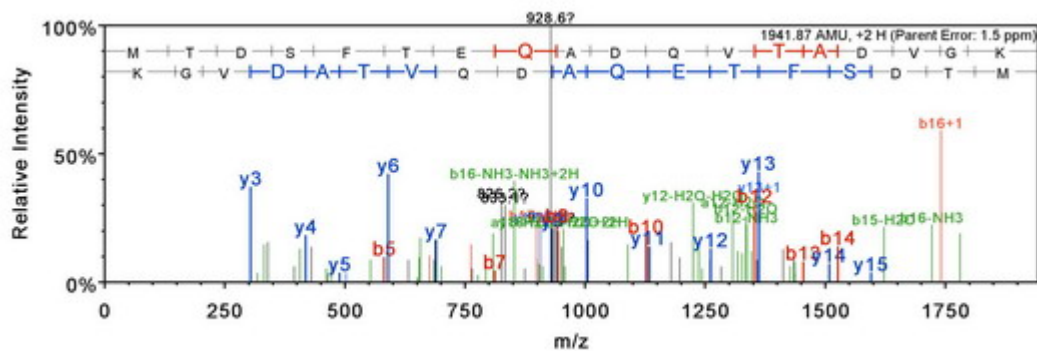

| B  | B Ions | B+2H  | B-NH3  | B-H2O  | AA | Y Ions | Y+2H  | Y-NH3  | Y-H2O  | Y  |
|----|--------|-------|--------|--------|----|--------|-------|--------|--------|----|
| 1  | 132.1  |       |        |        | M  | 1942.9 | 971.9 | 1925.8 | 1924.9 | 18 |
| 2  | 233.1  |       |        | 215.1  | T  | 1811.8 | 906.4 | 1794.8 | 1793.8 | 17 |
| 3  | 348.1  |       |        | 330.1  | D  | 1710.8 | 855.9 | 1693.8 | 1692.8 | 16 |
| 4  | 435.2  |       |        | 417.1  | S  | 1595.8 | 798.4 | 1578.7 | 1577.7 | 15 |
| 5  | 582.2  |       |        | 564.2  | F  | 1508.7 | 754.9 | 1491.7 | 1490.7 | 14 |
| 6  | 683.3  | 342.1 |        | 665.3  | T  | 1361.7 | 681.3 | 1344.6 | 1343.6 | 13 |
| 7  | 812.3  | 406.7 |        | 794.3  | E  | 1260.6 | 630.8 | 1243.6 | 1242.6 | 12 |
| 8  | 940.4  | 470.7 | 923.4  | 922.4  | Q  | 1131.6 | 566.3 | 1114.5 | 1113.5 | 11 |
| 9  | 1011.4 | 506.2 | 994.4  | 993.4  | A  | 1003.5 | 502.3 | 986.5  | 985.5  | 10 |
| 10 | 1126.4 | 563.7 | 1109.4 | 1108.4 | D  | 932.5  | 466.7 | 915.4  | 914.5  | 9  |
| 11 | 1254.5 | 627.8 | 1237.5 | 1236.5 | Q  | 817.4  | 409.2 | 800.4  | 799.4  | 8  |
| 12 | 1353.6 | 677.3 | 1336.5 | 1335.5 | V  | 689.4  | 345.2 | 672.4  | 671.4  | 7  |
| 13 | 1454.6 | 727.8 | 1437.6 | 1436.6 | T  | 590.3  | 295.7 | 573.3  | 572.3  | 6  |
| 14 | 1525.7 | 763.3 | 1508.6 | 1507.6 | A  | 489.3  |       | 472.2  | 471.3  | 5  |
| 15 | 1640.7 | 820.8 | 1623.7 | 1622.7 | D  | 418.2  |       | 401.2  | 400.2  | 4  |
| 16 | 1739.7 | 870.4 | 1722.7 | 1721.7 | V  | 303.2  |       | 286.2  |        | 3  |
| 17 | 1796.8 | 898.9 | 1779.7 | 1778.8 | G  | 204.1  |       | 187.1  |        | 2  |
| 18 | 1942.9 | 971.9 | 1925.8 | 1924.9 | K  | 147.1  |       | 130.1  |        | 1  |

Gene symbol: Rab1

Protein name: Ras-related protein Rab-1A

Protein accession numbers: IPI00114560

Peptide sequence: (K)EFADSLGIPFLETSAK(N)

Exclusive (unique to this protein): TRUE

SEQUEST XCorr score: 2.51 SEQUEST DCn score: 0.412

Fix modifications: None

Variable modifications: None

charge: 2

Observed m/z: 862.9375

Actual minus calculated peptide mass (AMU): -0.007813

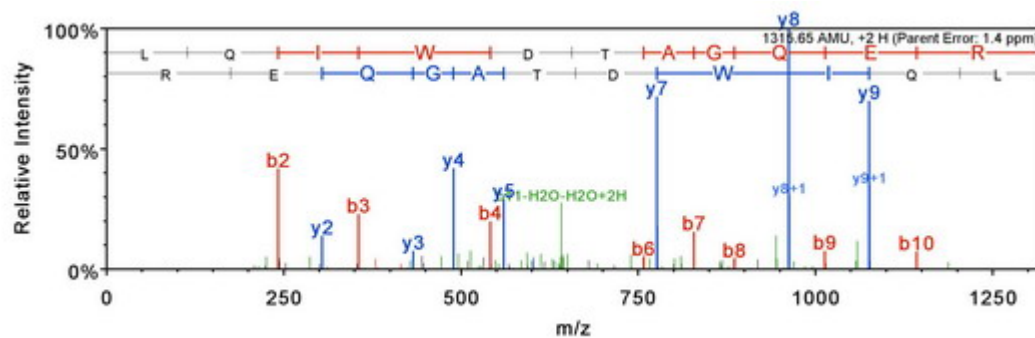

| B  | B Ions | B+2H  | B-NH3  | B-H2O  | AA | Y Ions | Y+2H  | Y-NH3  | Y-H2O  | Y  |
|----|--------|-------|--------|--------|----|--------|-------|--------|--------|----|
| 1  | 114.1  |       |        |        | L  | 1316.7 | 658.8 | 1299.6 | 1298.7 | 11 |
| 2  | 242.2  |       | 225.1  |        | Q  | 1203.6 | 602.3 | 1186.5 | 1185.6 | 10 |
| 3  | 355.2  |       | 338.2  |        | I  | 1075.5 | 538.3 | 1058.5 | 1057.5 | 9  |
| 4  | 541.3  |       | 524.3  |        | W  | 962.4  | 481.7 | 945.4  | 944.4  | 8  |
| 5  | 656.3  |       | 639.3  | 638.3  | D  | 776.4  | 388.7 | 759.3  | 758.3  | 7  |
| 6  | 757.4  | 379.2 | 740.4  | 739.4  | T  | 661.3  | 331.2 | 644.3  | 643.3  | 6  |
| 7  | 828.4  | 414.7 | 811.4  | 810.4  | A  | 560.3  |       | 543.3  | 542.3  | 5  |
| 8  | 885.5  | 443.2 | 868.4  | 867.4  | G  | 489.2  |       | 472.2  | 471.2  | 4  |
| 9  | 1013.5 | 507.3 | 996.5  | 995.5  | Q  | 432.2  |       | 415.2  | 414.2  | 3  |
| 10 | 1142.5 | 571.8 | 1125.5 | 1124.5 | E  | 304.2  |       | 287.1  | 286.2  | 2  |
| 11 | 1316.7 | 658.8 | 1299.6 | 1298.7 | R  | 175.1  |       | 158.1  |        | 1  |

Gene symbol: Rab11b

Protein name: Ras-related protein Rab-11B

Protein accession numbers: IPI00135869,IPI00651918

Peptide sequence: (R)GAVGALLVYDIAK(H)

Exclusive (unique to this protein): TRUE

SEQUEST XCorr score: 2.17 SEQUEST DCn score: 0.584

Fix modifications: None

Variable modifications: None

charge: 2

Observed m/z: 645.3774

Actual minus calculated peptide mass (AMU): -0.0001221

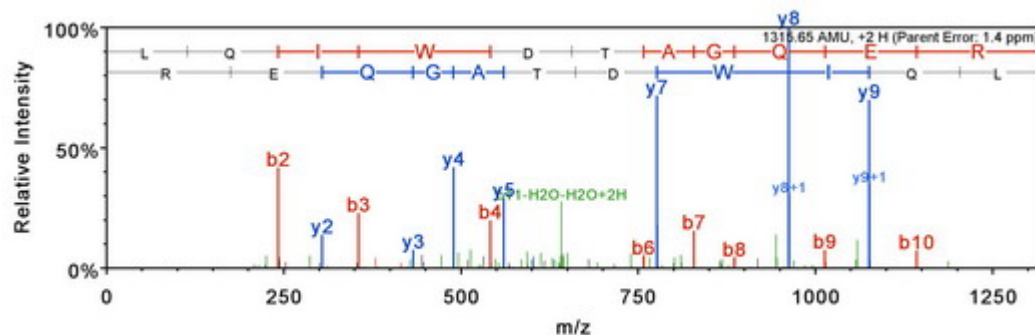

| B  | B Ions | B+2H  | B-NH3  | B-H2O  | AA | Y Ions | Y+2H  | Y-NH3  | Y-H2O  | Y  |
|----|--------|-------|--------|--------|----|--------|-------|--------|--------|----|
| 1  | 114.1  |       |        |        | L  | 1316.7 | 658.8 | 1299.6 | 1298.7 | 11 |
| 2  | 242.2  |       | 225.1  |        | Q  | 1203.6 | 602.3 | 1186.5 | 1185.6 | 10 |
| 3  | 355.2  |       | 338.2  |        | I  | 1075.5 | 538.3 | 1058.5 | 1057.5 | 9  |
| 4  | 541.3  |       | 524.3  |        | W  | 962.4  | 481.7 | 945.4  | 944.4  | 8  |
| 5  | 656.3  |       | 639.3  | 638.3  | D  | 776.4  | 388.7 | 759.3  | 758.3  | 7  |
| 6  | 757.4  | 379.2 | 740.4  | 739.4  | T  | 661.3  | 331.2 | 644.3  | 643.3  | 6  |
| 7  | 828.4  | 414.7 | 811.4  | 810.4  | A  | 560.3  |       | 543.3  | 542.3  | 5  |
| 8  | 885.5  | 443.2 | 868.4  | 867.4  | G  | 489.2  |       | 472.2  | 471.2  | 4  |
| 9  | 1013.5 | 507.3 | 996.5  | 995.5  | Q  | 432.2  |       | 415.2  | 414.2  | 3  |
| 10 | 1142.5 | 571.8 | 1125.5 | 1124.5 | E  | 304.2  |       | 287.1  | 286.2  | 2  |
| 11 | 1316.7 | 658.8 | 1299.6 | 1298.7 | R  | 175.1  |       | 158.1  |        | 1  |

Gene symbol: Rab22a

Protein name: Ras-related protein Rab-22A  
 Protein accession numbers: IPI00116729,IPI00751807  
 Peptide sequence: (K)FLIWDTAGQER(F)  
 Exclusive (unique to this protein): TRUE  
 SEQUEST XCorr score: 2.02 SEQUEST DCn score: 0.41  
 Fix modifications: None  
 Variable modifications: None  
 charge: 2 Observed m/z: 668.3349  
 Actual minus calculated peptide mass (AMU): -0.007935

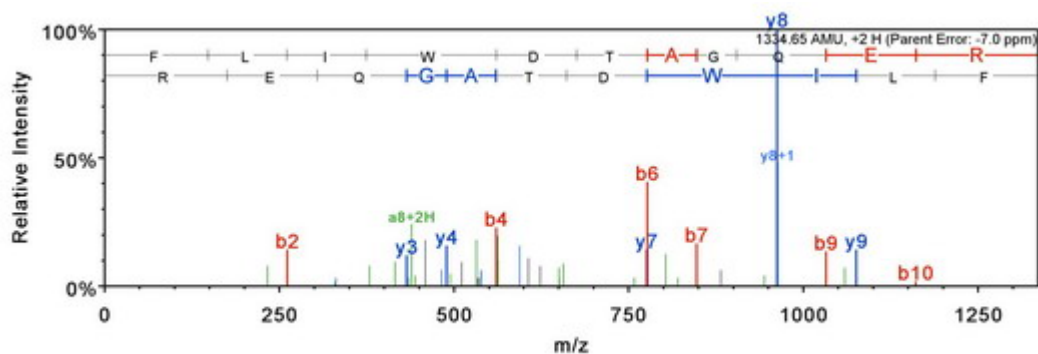

| B  | B ions | B+2H  | B-NH3  | B-H2O  | AA | Y ions | Y+2H  | Y-NH3  | Y-H2O  | Y  |
|----|--------|-------|--------|--------|----|--------|-------|--------|--------|----|
| 1  | 148.1  |       |        |        | F  | 1335.7 | 668.3 | 1318.6 | 1317.7 | 11 |
| 2  | 261.2  |       |        |        | L  | 1188.6 | 594.8 | 1171.6 | 1170.6 | 10 |
| 3  | 374.2  |       |        |        | I  | 1075.5 | 538.3 | 1058.5 | 1057.5 | 9  |
| 4  | 560.3  |       |        |        | W  | 962.4  | 481.7 | 945.4  | 944.4  | 8  |
| 5  | 675.4  |       |        | 657.3  | D  | 776.4  | 388.7 | 759.3  | 758.3  | 7  |
| 6  | 776.4  | 388.7 |        | 758.4  | T  | 661.3  | 331.2 | 644.3  | 643.3  | 6  |
| 7  | 847.4  | 424.2 |        | 829.4  | A  | 560.3  |       | 543.3  | 542.3  | 5  |
| 8  | 904.5  | 452.7 |        | 886.5  | G  | 489.2  |       | 472.2  | 471.2  | 4  |
| 9  | 1032.5 | 516.8 | 1015.5 | 1014.5 | Q  | 432.2  |       | 415.2  | 414.2  | 3  |
| 10 | 1161.6 | 581.3 | 1144.5 | 1143.5 | E  | 304.2  |       | 287.1  | 286.2  | 2  |
| 11 | 1335.7 | 668.3 | 1318.6 | 1317.7 | R  | 175.1  |       | 158.1  |        | 1  |

Gene symbol: Rab27a  
 Protein name: Ras-related protein Rab-27A  
 Protein accession numbers: IPI00112374  
 Peptide sequence: (R)IHLQLWDTAGQER(F)  
 Exclusive (unique to this protein): TRUE  
 SEQUEST XCorr score: 2.05 SEQUEST DCn score: 0.579  
 Fix modifications: None  
 Variable modifications: None  
 charge: 2 Observed m/z: 783.9012  
 Actual minus calculated peptide mass (AMU): -0.008423

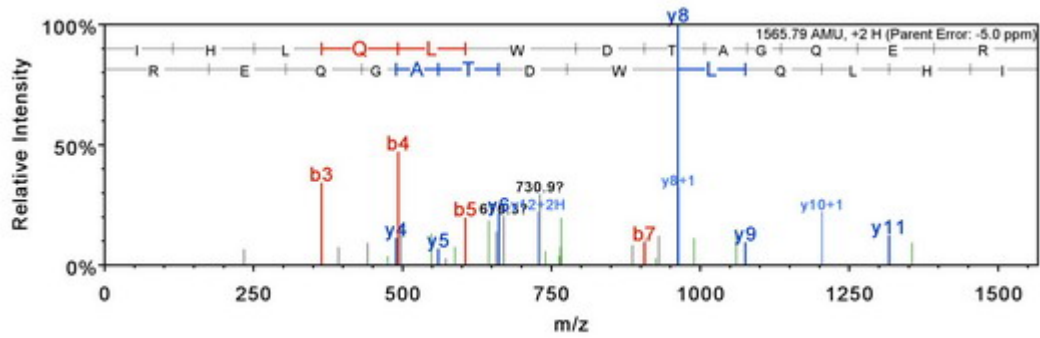

| B  | B Ions | B+2H  | B-NH3  | B-H2O  | AA | Y Ions | Y+2H  | Y-NH3  | Y-H2O  | Y  |
|----|--------|-------|--------|--------|----|--------|-------|--------|--------|----|
| 1  | 114.1  |       |        |        | I  | 1566.8 | 783.9 | 1549.8 | 1548.8 | 13 |
| 2  | 251.2  | 126.1 |        |        | H  | 1453.7 | 727.4 | 1436.7 | 1435.7 | 12 |
| 3  | 364.2  | 182.6 |        |        | L  | 1316.7 | 658.8 | 1299.6 | 1298.7 | 11 |
| 4  | 492.3  | 246.7 | 475.3  |        | Q  | 1203.6 | 602.3 | 1186.5 | 1185.6 | 10 |
| 5  | 605.4  | 303.2 | 588.4  |        | L  | 1075.5 | 538.3 | 1058.5 | 1057.5 | 9  |
| 6  | 791.5  | 396.2 | 774.4  |        | W  | 962.4  | 481.7 | 945.4  | 944.4  | 8  |
| 7  | 906.5  | 453.8 | 889.5  | 888.5  | D  | 776.4  | 388.7 | 759.3  | 758.3  | 7  |
| 8  | 1007.5 | 504.3 | 990.5  | 989.5  | T  | 661.3  | 331.2 | 644.3  | 643.3  | 6  |
| 9  | 1078.6 | 539.8 | 1061.5 | 1060.6 | A  | 560.3  |       | 543.3  | 542.3  | 5  |
| 10 | 1135.6 | 568.3 | 1118.6 | 1117.6 | G  | 489.2  |       | 472.2  | 471.2  | 4  |
| 11 | 1263.7 | 632.3 | 1246.6 | 1245.6 | Q  | 432.2  |       | 415.2  | 414.2  | 3  |
| 12 | 1392.7 | 696.9 | 1375.7 | 1374.7 | E  | 304.2  |       | 287.1  | 286.2  | 2  |
| 13 | 1566.8 | 783.9 | 1549.8 | 1548.8 | R  | 175.1  |       | 158.1  |        | 1  |

Gene symbol: Rab38

Protein name: Ras-related protein Rab-38

Protein accession numbers: IPI00154087

Peptide sequence: (R)LQLWDIAGQER(F)

Exclusive (unique to this protein): TRUE

SEQUEST XCorr score: 2.45 SEQUEST DCn score: 0.636

Fix modifications: None

Variable modifications: None

charge: 2

Observed m/z: 664.8478

Actual minus calculated peptide mass (AMU): -0.008789

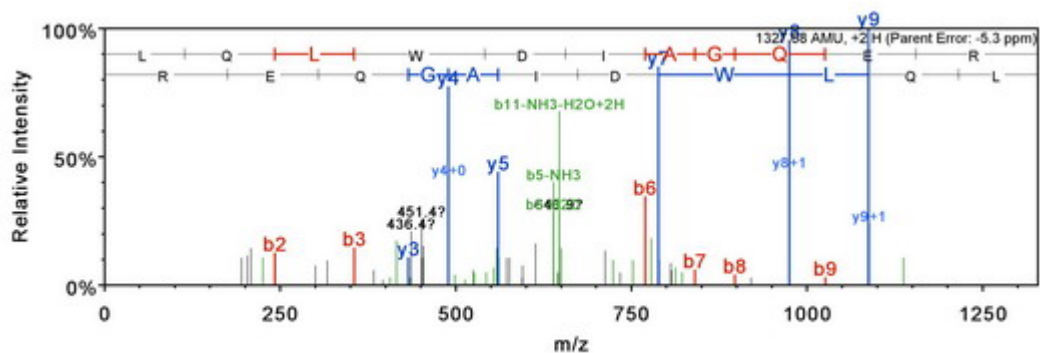

| B  | B Ions | B+2H  | B-NH3  | B-H2O  | AA | Y Ions | Y+2H  | Y-NH3  | Y-H2O  | Y  |
|----|--------|-------|--------|--------|----|--------|-------|--------|--------|----|
| 1  | 114.1  |       |        |        | L  | 1328.7 | 664.9 | 1311.7 | 1310.7 | 11 |
| 2  | 242.2  |       | 225.1  |        | Q  | 1215.6 | 608.3 | 1198.6 | 1197.6 | 10 |
| 3  | 355.2  |       | 338.2  |        | L  | 1087.5 | 544.3 | 1070.5 | 1069.5 | 9  |
| 4  | 541.3  |       | 524.3  |        | W  | 974.5  | 487.7 | 957.4  | 956.5  | 8  |
| 5  | 656.3  |       | 639.3  | 638.3  | D  | 788.4  | 394.7 | 771.4  | 770.4  | 7  |
| 6  | 769.4  | 385.2 | 752.4  | 751.4  | I  | 673.4  | 337.2 | 656.3  | 655.4  | 6  |
| 7  | 840.5  | 420.7 | 823.4  | 822.5  | A  | 560.3  |       | 543.3  | 542.3  | 5  |
| 8  | 897.5  | 449.3 | 880.5  | 879.5  | G  | 489.2  |       | 472.2  | 471.2  | 4  |
| 9  | 1025.5 | 513.3 | 1008.5 | 1007.5 | Q  | 432.2  |       | 415.2  | 414.2  | 3  |
| 10 | 1154.6 | 577.8 | 1137.6 | 1136.6 | E  | 304.2  |       | 287.1  | 286.2  | 2  |
| 11 | 1328.7 | 664.9 | 1311.7 | 1310.7 | R  | 175.1  |       | 158.1  |        | 1  |

Gene symbol: Rab5a

Protein name: Ras-related protein Rab-5A

Protein accession numbers: IPI00132410

Peptide sequence: (K)FEIWDTAGQER(Y)

Exclusive (unique to this protein): TRUE

SEQUEST XCorr score: 2.1 SEQUEST DCn score: 0.437

Fix modifications: None

Variable modifications: None

charge: 2

Observed m/z: 676.3168

Actual minus calculated peptide mass (AMU): -0.002564

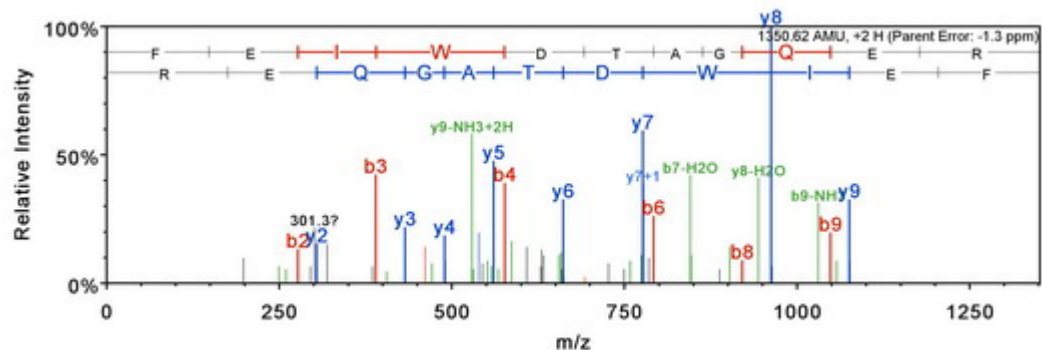

| B  | B Ions | B+2H  | B-NH3  | B-H2O  | AA | Y Ions | Y+2H  | Y-NH3  | Y-H2O  | Y  |
|----|--------|-------|--------|--------|----|--------|-------|--------|--------|----|
| 1  | 148.1  |       |        |        | F  | 1351.6 | 676.3 | 1334.6 | 1333.6 | 11 |
| 2  | 277.1  |       |        | 259.1  | E  | 1204.6 | 602.8 | 1187.5 | 1186.5 | 10 |
| 3  | 390.2  |       |        | 372.2  | I  | 1075.5 | 538.3 | 1058.5 | 1057.5 | 9  |
| 4  | 576.3  |       |        | 558.3  | W  | 962.4  | 481.7 | 945.4  | 944.4  | 8  |
| 5  | 691.3  |       |        | 673.3  | D  | 776.4  | 388.7 | 759.3  | 758.3  | 7  |
| 6  | 792.4  | 396.7 |        | 774.4  | T  | 661.3  | 331.2 | 644.3  | 643.3  | 6  |
| 7  | 863.4  | 432.2 |        | 845.4  | A  | 560.3  |       | 543.3  | 542.3  | 5  |
| 8  | 920.4  | 460.7 |        | 902.4  | G  | 489.2  |       | 472.2  | 471.2  | 4  |
| 9  | 1048.5 | 524.7 | 1031.5 | 1030.5 | Q  | 432.2  |       | 415.2  | 414.2  | 3  |
| 10 | 1177.5 | 589.3 | 1160.5 | 1159.5 | E  | 304.2  |       | 287.1  | 286.2  | 2  |
| 11 | 1351.6 | 676.3 | 1334.6 | 1333.6 | R  | 175.1  |       | 158.1  |        | 1  |



Gene symbol: Rab5b  
 Protein name: Rab5B  
 Protein accession numbers: IPI00116563,IPI00458976,IPI00849548  
 Peptide sequence: (R)GAQAIVVYDITNQETFAR(A)  
 Exclusive (unique to this protein): TRUE  
 SEQUEST XCorr score: 2.5 SEQUEST DCn score: 0.638  
 Fix modifications: None  
 Variable modifications: None  
 charge: 2 Observed m/z: 1034.0258  
 Actual minus calculated peptide mass (AMU): -0.007324

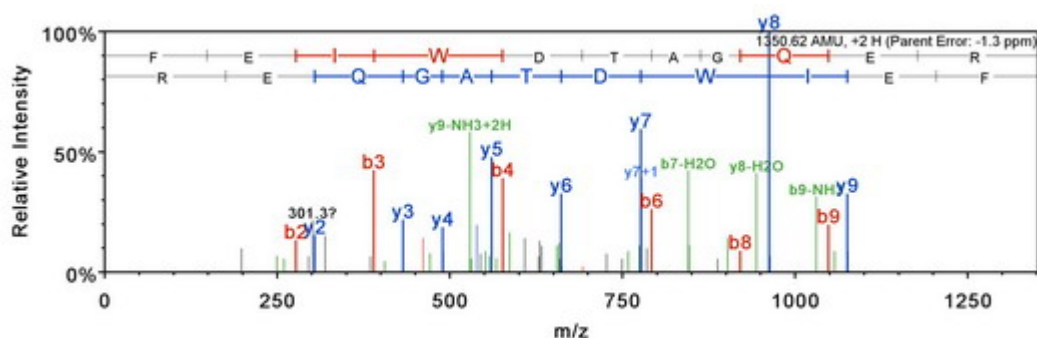

| B  | B ions | B+2H  | B-NH3  | B-H2O  | AA | Y ions | Y+2H  | Y-NH3  | Y-H2O  | Y  |
|----|--------|-------|--------|--------|----|--------|-------|--------|--------|----|
| 1  | 148.1  |       |        |        | F  | 1351.6 | 676.3 | 1334.6 | 1333.6 | 11 |
| 2  | 277.1  |       |        | 259.1  | E  | 1204.6 | 602.8 | 1187.5 | 1186.5 | 10 |
| 3  | 390.2  |       |        | 372.2  | I  | 1075.5 | 538.3 | 1058.5 | 1057.5 | 9  |
| 4  | 576.3  |       |        | 558.3  | W  | 962.4  | 481.7 | 945.4  | 944.4  | 8  |
| 5  | 691.3  |       |        | 673.3  | D  | 776.4  | 388.7 | 759.3  | 758.3  | 7  |
| 6  | 792.4  | 396.7 |        | 774.4  | T  | 661.3  | 331.2 | 644.3  | 643.3  | 6  |
| 7  | 863.4  | 432.2 |        | 845.4  | A  | 560.3  |       | 543.3  | 542.3  | 5  |
| 8  | 920.4  | 460.7 |        | 902.4  | G  | 489.2  |       | 472.2  | 471.2  | 4  |
| 9  | 1048.5 | 524.7 | 1031.5 | 1030.5 | Q  | 432.2  |       | 415.2  | 414.2  | 3  |
| 10 | 1177.5 | 589.3 | 1160.5 | 1159.5 | E  | 304.2  |       | 287.1  | 286.2  | 2  |
| 11 | 1351.6 | 676.3 | 1334.6 | 1333.6 | R  | 175.1  |       | 158.1  |        | 1  |

Gene symbol: Rac1  
 Protein name: Mammary gland RCB-0527 Jyg-MC(B) cDNA, RIKEN full-length enriched library,  
 clone:G930005L08 product:RAS-related C3 botulinum substrate 1, full insert sequence  
 Protein accession numbers: IPI00127408,IPI00761613  
 Peptide sequence: (K)PVNLGLWDTAGQEDYDR(L)  
 Exclusive (unique to this protein): TRUE  
 SEQUEST XCorr score: 2.68 SEQUEST DCn score: 0.796  
 Fix modifications: None  
 Variable modifications: None  
 charge: 2 Observed m/z: 974.9591  
 Actual minus calculated peptide mass (AMU): 0.006104

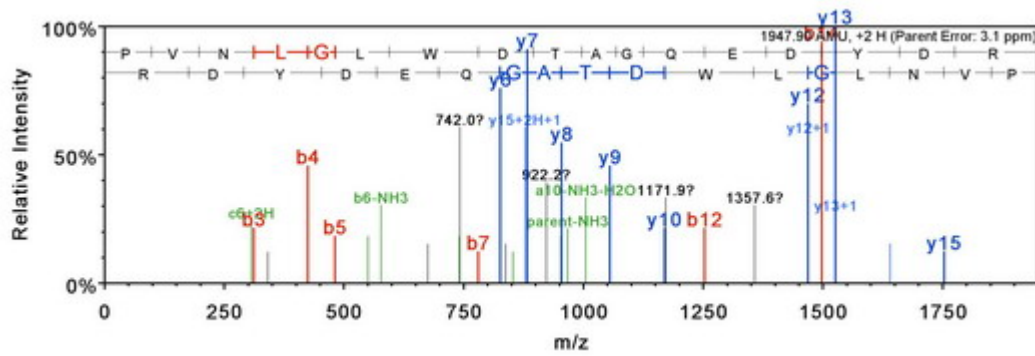

| B  | B ions | B+2H  | B-NH3  | B-H2O  | AA | Y ions | Y+2H  | Y-NH3  | Y-H2O  | Y  |
|----|--------|-------|--------|--------|----|--------|-------|--------|--------|----|
| 1  | 98.1   |       |        |        | P  | 1948.9 | 975.0 | 1931.9 | 1930.9 | 17 |
| 2  | 197.1  |       |        |        | V  | 1851.9 | 926.4 | 1834.8 | 1833.8 | 16 |
| 3  | 311.2  |       | 294.2  |        | N  | 1752.8 | 876.9 | 1735.8 | 1734.8 | 15 |
| 4  | 424.3  |       | 407.2  |        | L  | 1638.7 | 819.9 | 1621.7 | 1620.7 | 14 |
| 5  | 481.3  |       | 464.3  |        | G  | 1525.7 | 763.3 | 1508.6 | 1507.7 | 13 |
| 6  | 594.4  | 297.7 | 577.3  |        | L  | 1468.6 | 734.8 | 1451.6 | 1450.6 | 12 |
| 7  | 780.4  | 390.7 | 763.4  |        | W  | 1355.5 | 678.3 | 1338.5 | 1337.5 | 11 |
| 8  | 895.5  | 448.2 | 878.4  | 877.5  | D  | 1169.5 | 585.2 | 1152.4 | 1151.5 | 10 |
| 9  | 996.5  | 498.8 | 979.5  | 978.5  | T  | 1054.4 | 527.7 | 1037.4 | 1036.4 | 9  |
| 10 | 1067.5 | 534.3 | 1050.5 | 1049.5 | A  | 953.4  | 477.2 | 936.4  | 935.4  | 8  |
| 11 | 1124.6 | 562.8 | 1107.5 | 1106.6 | G  | 882.4  | 441.7 | 865.3  | 864.4  | 7  |
| 12 | 1252.6 | 626.8 | 1235.6 | 1234.6 | Q  | 825.3  | 413.2 | 808.3  | 807.3  | 6  |
| 13 | 1381.7 | 691.3 | 1364.7 | 1363.7 | E  | 697.3  |       | 680.3  | 679.3  | 5  |
| 14 | 1496.7 | 748.9 | 1479.7 | 1478.7 | D  | 568.2  |       | 551.2  | 550.2  | 4  |
| 15 | 1659.8 | 830.4 | 1642.7 | 1641.8 | Y  | 453.2  |       | 436.2  | 435.2  | 3  |
| 16 | 1774.8 | 887.9 | 1757.8 | 1756.8 | D  | 290.2  |       | 273.1  | 272.1  | 2  |
| 17 | 1948.9 | 975.0 | 1931.9 | 1930.9 | R  | 175.1  |       | 158.1  |        | 1  |

Gene symbol: Rad51

Protein name: DNA repair protein RAD51 homolog 1

Protein accession numbers: IPI00118524,IPI00750989,IPI00756623

Peptide sequence: (R)YGLSGSDVLDNVAYAR(G)

Exclusive (unique to this protein): TRUE

SEQUEST XCorr score: 2.28 SEQUEST DCn score: 0.634

Fix modifications: None

Variable modifications: None

charge: 2 Observed m/z: 850.4151

Actual minus calculated peptide mass (AMU): -0.006592

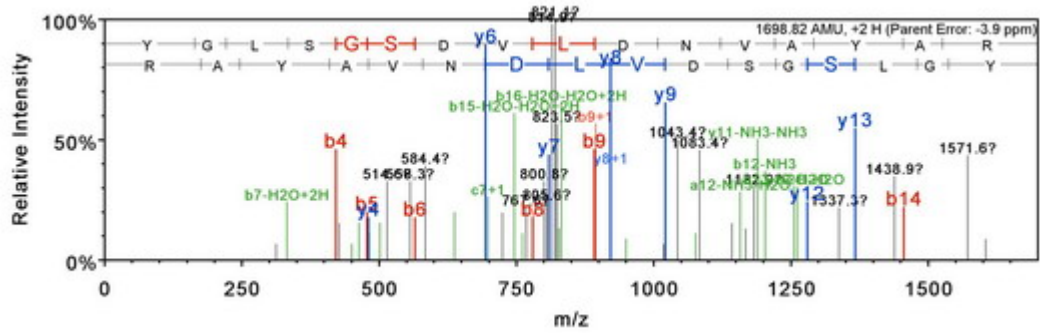

| B  | B ions | B+2H  | B-NH3  | B-H2O  | AA | Y ions | Y+2H  | Y-NH3  | Y-H2O  | Y  |
|----|--------|-------|--------|--------|----|--------|-------|--------|--------|----|
| 1  | 164.1  |       |        |        | Y  | 1699.8 | 850.4 | 1682.8 | 1681.8 | 16 |
| 2  | 221.1  |       |        |        | G  | 1536.8 | 768.9 | 1519.7 | 1518.8 | 15 |
| 3  | 334.2  |       |        |        | L  | 1479.7 | 740.4 | 1462.7 | 1461.7 | 14 |
| 4  | 421.2  |       |        | 403.2  | S  | 1366.7 | 683.8 | 1349.6 | 1348.7 | 13 |
| 5  | 478.2  |       |        | 460.2  | G  | 1279.6 | 640.3 | 1262.6 | 1261.6 | 12 |
| 6  | 565.3  | 283.1 |        | 547.3  | S  | 1222.6 | 611.8 | 1205.6 | 1204.6 | 11 |
| 7  | 680.3  | 340.7 |        | 662.3  | D  | 1135.6 | 568.3 | 1118.5 | 1117.6 | 10 |
| 8  | 779.4  | 390.2 |        | 761.4  | V  | 1020.6 | 510.8 | 1003.5 | 1002.5 | 9  |
| 9  | 892.4  | 446.7 |        | 874.4  | L  | 921.5  | 461.2 | 904.5  | 903.5  | 8  |
| 10 | 1007.5 | 504.2 |        | 989.5  | D  | 808.4  | 404.7 | 791.4  | 790.4  | 7  |
| 11 | 1121.5 | 561.3 | 1104.5 | 1103.5 | N  | 693.4  | 347.2 | 676.3  |        | 6  |
| 12 | 1220.6 | 610.8 | 1203.5 | 1202.6 | V  | 579.3  |       | 562.3  |        | 5  |
| 13 | 1291.6 | 646.3 | 1274.6 | 1273.6 | A  | 480.3  |       | 463.2  |        | 4  |
| 14 | 1454.7 | 727.8 | 1437.7 | 1436.7 | Y  | 409.2  |       | 392.2  |        | 3  |
| 15 | 1525.7 | 763.4 | 1508.7 | 1507.7 | A  | 246.2  |       | 229.1  |        | 2  |
| 16 | 1699.8 | 850.4 | 1682.8 | 1681.8 | R  | 175.1  |       | 158.1  |        | 1  |

Gene symbol: Ranbp5

Protein name: Isoform 2 of Importin beta-3

Protein accession numbers: IPI00409936,IPI00626994

Peptide sequence: (R)ATAAFILANEHNVALFK(H)

Exclusive (unique to this protein): TRUE

SEQUEST XCorr score: 2.29 SEQUEST DCn score: 0.526

Fix modifications: None

Variable modifications: None

charge: 2

Observed m/z: 915.4974

Actual minus calculated peptide mass (AMU): -0.004395

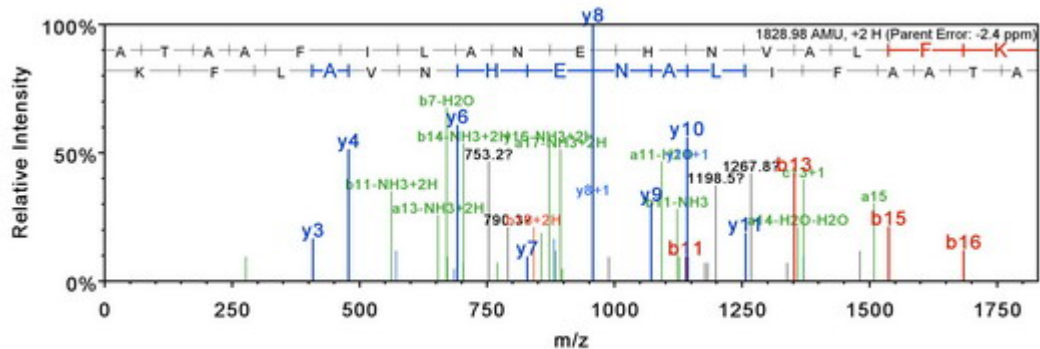

| B  | B Ions | B+2H  | B-NH3  | B-H2O  | AA | Y Ions | Y+2H  | Y-NH3  | Y-H2O  | Y  |
|----|--------|-------|--------|--------|----|--------|-------|--------|--------|----|
| 1  | 72.0   |       |        |        | A  | 1830.0 | 915.5 | 1813.0 | 1812.0 | 17 |
| 2  | 173.1  |       |        | 155.1  | T  | 1759.0 | 880.0 | 1741.9 | 1740.9 | 16 |
| 3  | 244.1  |       |        | 226.1  | A  | 1657.9 | 829.5 | 1640.9 | 1639.9 | 15 |
| 4  | 315.2  |       |        | 297.2  | A  | 1586.9 | 793.9 | 1569.8 | 1568.9 | 14 |
| 5  | 462.2  |       |        | 444.2  | F  | 1515.8 | 758.4 | 1498.8 | 1497.8 | 13 |
| 6  | 575.3  | 288.2 |        | 557.3  | I  | 1368.8 | 684.9 | 1351.7 | 1350.8 | 12 |
| 7  | 688.4  | 344.7 |        | 670.4  | L  | 1255.7 | 628.3 | 1238.7 | 1237.7 | 11 |
| 8  | 759.4  | 380.2 |        | 741.4  | A  | 1142.6 | 571.8 | 1125.6 | 1124.6 | 10 |
| 9  | 873.5  | 437.3 | 856.5  | 855.5  | N  | 1071.6 | 536.3 | 1054.5 | 1053.5 | 9  |
| 10 | 1002.5 | 501.8 | 985.5  | 984.5  | E  | 957.5  | 479.3 | 940.5  | 939.5  | 8  |
| 11 | 1139.6 | 570.3 | 1122.6 | 1121.6 | H  | 828.5  | 414.7 | 811.5  |        | 7  |
| 12 | 1253.6 | 627.3 | 1236.6 | 1235.6 | N  | 691.4  | 346.2 | 674.4  |        | 6  |
| 13 | 1352.7 | 676.9 | 1335.7 | 1334.7 | V  | 577.4  |       | 560.3  |        | 5  |
| 14 | 1423.7 | 712.4 | 1406.7 | 1405.7 | A  | 478.3  |       | 461.3  |        | 4  |
| 15 | 1536.8 | 768.9 | 1519.8 | 1518.8 | L  | 407.3  |       | 390.2  |        | 3  |
| 16 | 1683.9 | 842.5 | 1666.9 | 1665.9 | F  | 294.2  |       | 277.2  |        | 2  |
| 17 | 1830.0 | 915.5 | 1813.0 | 1812.0 | K  | 147.1  |       | 130.1  |        | 1  |

Gene symbol: Rbbp5

Protein name: NOD-derived CD11c +ve dendritic cells cDNA, RIKEN full-length enriched library, clone:F630106K17 product:retinoblastoma binding protein 5, full insert sequence

Protein accession numbers: IPI00226384

Peptide sequence: (K)GSCFLINTADRIIRVYDGR(E)

Exclusive (unique to this protein): TRUE

SEQUEST XCorr score: 2.55 SEQUEST DCn score: 0.364

Fix modifications: C3: Carbamidomethyl (+57.02)Variable modifications: None

charge: 2

Observed m/z: 1113.5671

Actual minus calculated peptide mass (AMU): -0.019052

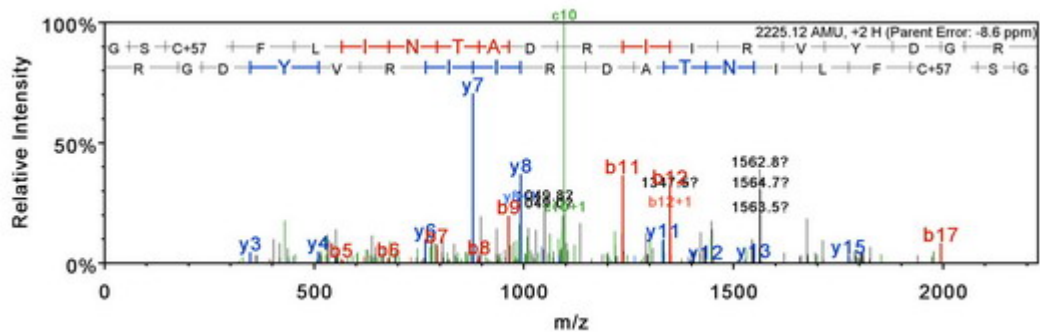

| B  | B Ions | B+2H   | B-NH3  | B-H2O  | AA   | Y Ions | Y+2H   | Y-NH3  | Y-H2O  | Y  |
|----|--------|--------|--------|--------|------|--------|--------|--------|--------|----|
| 1  | 58.0   |        |        |        | G    | 2226.2 | 1113.6 | 2209.1 | 2208.1 | 19 |
| 2  | 145.1  |        |        | 127.1  | S    | 2169.1 | 1085.1 | 2152.1 | 2151.1 | 18 |
| 3  | 305.1  |        |        | 287.1  | C+57 | 2082.1 | 1041.5 | 2065.1 | 2064.1 | 17 |
| 4  | 452.2  |        |        | 434.2  | F    | 1922.1 | 961.5  | 1905.0 | 1904.1 | 16 |
| 5  | 565.2  |        |        | 547.2  | L    | 1775.0 | 888.0  | 1758.0 | 1757.0 | 15 |
| 6  | 678.3  | 339.7  |        | 660.3  | I    | 1661.9 | 831.5  | 1644.9 | 1643.9 | 14 |
| 7  | 792.4  | 396.7  | 775.3  | 774.4  | N    | 1548.8 | 774.9  | 1531.8 | 1530.8 | 13 |
| 8  | 893.4  | 447.2  | 876.4  | 875.4  | T    | 1434.8 | 717.9  | 1417.8 | 1416.8 | 12 |
| 9  | 964.5  | 482.7  | 947.4  | 946.5  | A    | 1333.7 | 667.4  | 1316.7 | 1315.7 | 11 |
| 10 | 1079.5 | 540.3  | 1062.5 | 1061.5 | D    | 1262.7 | 631.9  | 1245.7 | 1244.7 | 10 |
| 11 | 1235.6 | 618.3  | 1218.6 | 1217.6 | R    | 1147.7 | 574.3  | 1130.6 | 1129.7 | 9  |
| 12 | 1348.7 | 674.8  | 1331.6 | 1330.7 | I    | 991.6  | 496.3  | 974.5  | 973.6  | 8  |
| 13 | 1461.8 | 731.4  | 1444.7 | 1443.7 | I    | 878.5  | 439.8  | 861.5  | 860.5  | 7  |
| 14 | 1617.9 | 809.4  | 1600.8 | 1599.8 | R    | 765.4  | 383.2  | 748.4  | 747.4  | 6  |
| 15 | 1716.9 | 859.0  | 1699.9 | 1698.9 | V    | 609.3  |        | 592.3  | 591.3  | 5  |
| 16 | 1880.0 | 940.5  | 1863.0 | 1862.0 | Y    | 510.2  |        | 493.2  | 492.2  | 4  |
| 17 | 1995.0 | 998.0  | 1978.0 | 1977.0 | D    | 347.2  |        | 330.1  | 329.2  | 3  |
| 18 | 2052.0 | 1026.5 | 2035.0 | 2034.0 | G    | 232.1  |        | 215.1  |        | 2  |
| 19 | 2226.2 | 1113.6 | 2209.1 | 2208.1 | R    | 175.1  |        | 158.1  |        | 1  |

Gene symbol: Rbpms2

Protein name: RNA-binding protein with multiple splicing 2

Protein accession numbers: IPI00121434,IPI00461350

Peptide sequence: (R)TLFVSGLPVDIKPR(E)

Exclusive (unique to this protein): TRUE

SEQUEST XCorr score: 2.2 SEQUEST DCn score: 0.735

Fix modifications: None

Variable modifications: None

charge: 2

Observed m/z: 771.4526

Actual minus calculated peptide mass (AMU): -0.0085453

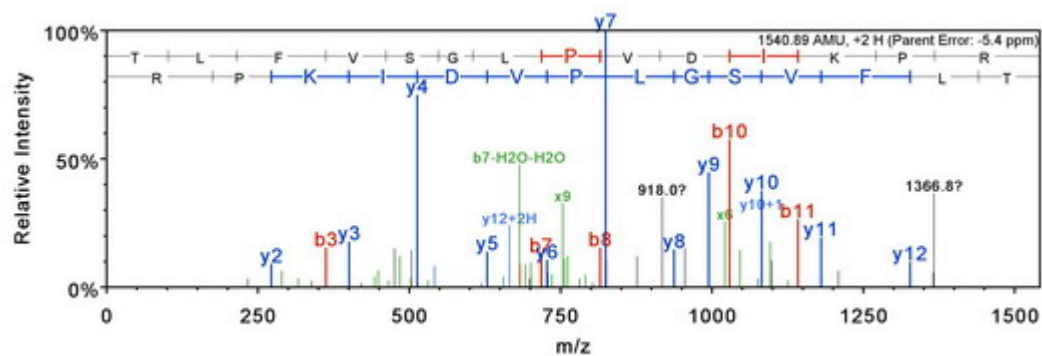

| B  | B ions | B+2H  | B-NH3  | B-H2O  | A,A | Y ions | Y+2H  | Y-NH3  | Y-H2O  | Y  |
|----|--------|-------|--------|--------|-----|--------|-------|--------|--------|----|
| 1  | 102.1  |       |        | 84.0   | T   | 1541.9 | 771.5 | 1524.9 | 1523.9 | 14 |
| 2  | 215.1  |       |        | 197.1  | L   | 1440.9 | 720.9 | 1423.8 | 1422.9 | 13 |
| 3  | 362.2  |       |        | 344.2  | F   | 1327.8 | 664.4 | 1310.8 | 1309.8 | 12 |
| 4  | 461.3  |       |        | 443.3  | V   | 1180.7 | 590.9 | 1163.7 | 1162.7 | 11 |
| 5  | 548.3  |       |        | 530.3  | S   | 1081.6 | 541.3 | 1064.6 | 1063.6 | 10 |
| 6  | 605.3  | 303.2 |        | 587.3  | G   | 994.6  | 497.8 | 977.6  | 976.6  | 9  |
| 7  | 718.4  | 359.7 |        | 700.4  | L   | 937.6  | 469.3 | 920.6  | 919.6  | 8  |
| 8  | 815.5  | 408.2 |        | 797.5  | P   | 824.5  | 412.8 | 807.5  | 806.5  | 7  |
| 9  | 914.5  | 457.8 |        | 896.5  | V   | 727.5  | 364.2 | 710.4  | 709.4  | 6  |
| 10 | 1029.6 | 515.3 |        | 1011.6 | D   | 628.4  | 314.7 | 611.4  | 610.4  | 5  |
| 11 | 1142.7 | 571.8 |        | 1124.6 | I   | 513.4  | 257.2 | 496.3  |        | 4  |
| 12 | 1270.7 | 635.9 | 1253.7 | 1252.7 | K   | 400.3  | 200.6 | 383.2  |        | 3  |
| 13 | 1367.8 | 684.4 | 1350.8 | 1349.8 | P   | 272.2  |       | 255.2  |        | 2  |
| 14 | 1541.9 | 771.5 | 1524.9 | 1523.9 | R   | 175.1  |       | 158.1  |        | 1  |

Gene symbol: Rbx1

Protein name: RING-box protein 1

Protein accession numbers: IPI00124752,IPI00849056,IPI00850857

Peptide sequence: (R)QVCPLDNREWFQK(Y)

Exclusive (unique to this protein): TRUE

SEQUEST XCorr score: 2.01 SEQUEST DCn score: 0.335

Fix modifications: C3: Carbamidomethyl (+57.02)Variable modifications: None

charge: 2

Observed m/z: 924.9404

Actual minus calculated peptide mass (AMU): 0.002564

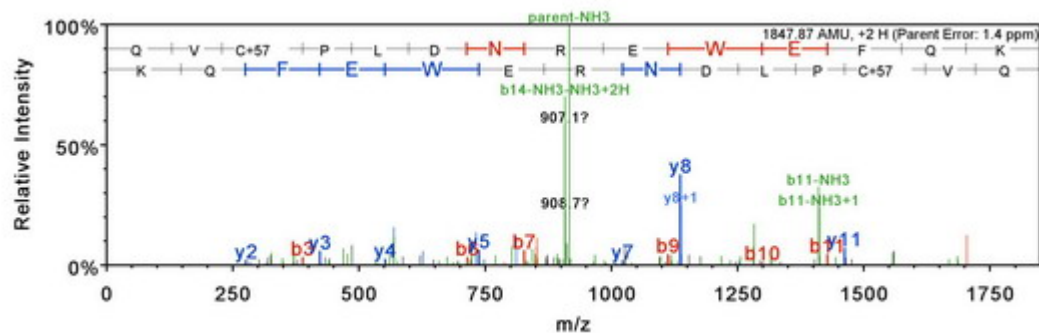

| B  | B ions | B+2H  | B-NH3  | B-H2O  | A,A  | Y ions | Y+2H  | Y-NH3  | Y-H2O  | Y  |
|----|--------|-------|--------|--------|------|--------|-------|--------|--------|----|
| 1  | 129.1  |       | 112.0  |        | Q    | 1848.9 | 924.9 | 1831.8 | 1830.9 | 14 |
| 2  | 228.1  |       | 211.1  |        | V    | 1720.8 | 860.9 | 1703.8 | 1702.8 | 13 |
| 3  | 388.2  |       | 371.1  |        | C+57 | 1621.7 | 811.4 | 1604.7 | 1603.7 | 12 |
| 4  | 485.2  |       | 468.2  |        | P    | 1461.7 | 731.4 | 1444.7 | 1443.7 | 11 |
| 5  | 598.3  |       | 581.3  |        | L    | 1364.7 | 682.8 | 1347.6 | 1346.7 | 10 |
| 6  | 713.3  | 357.2 | 696.3  | 695.3  | D    | 1251.6 | 626.3 | 1234.5 | 1233.6 | 9  |
| 7  | 827.4  | 414.2 | 810.4  | 809.4  | N    | 1136.5 | 568.8 | 1119.5 | 1118.5 | 8  |
| 8  | 983.5  | 492.2 | 966.5  | 965.5  | R    | 1022.5 | 511.8 | 1005.5 | 1004.5 | 7  |
| 9  | 1112.5 | 556.8 | 1095.5 | 1094.5 | E    | 866.4  | 433.7 | 849.4  | 848.4  | 6  |
| 10 | 1298.6 | 649.8 | 1281.6 | 1280.6 | W    | 737.4  |       | 720.3  | 719.4  | 5  |
| 11 | 1427.6 | 714.3 | 1410.6 | 1409.6 | E    | 551.3  |       | 534.3  | 533.3  | 4  |
| 12 | 1574.7 | 787.9 | 1557.7 | 1556.7 | F    | 422.2  |       | 405.2  |        | 3  |
| 13 | 1702.8 | 851.9 | 1685.7 | 1684.8 | Q    | 275.2  |       | 258.1  |        | 2  |
| 14 | 1848.9 | 924.9 | 1831.8 | 1830.9 | K    | 147.1  |       | 130.1  |        | 1  |

Gene symbol: Rdh11

Protein name: Retinol dehydrogenase 11

Protein accession numbers: IPI00136098

Peptide sequence: (R)EIQAVTGNSQVFVR(K)

Exclusive (unique to this protein): TRUE

SEQUEST XCorr score: 2.71 SEQUEST DCn score: 0.69

Fix modifications: None

Variable modifications: None

charge: 2

Observed m/z: 774.4144

Actual minus calculated peptide mass (AMU): 0.00293

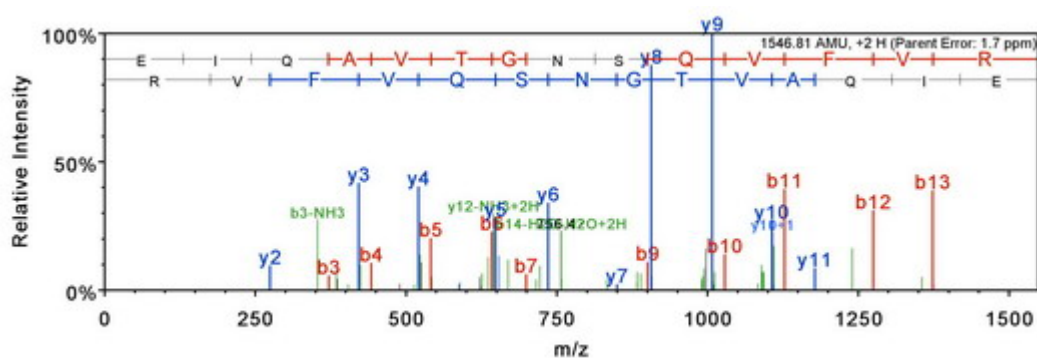

| B  | B ions | B+2H  | B-NH3  | B-H2O  | A,A | Y ions | Y+2H  | Y-NH3  | Y-H2O  | Y  |
|----|--------|-------|--------|--------|-----|--------|-------|--------|--------|----|
| 1  | 130.1  |       |        | 112.0  | E   | 1547.8 | 774.4 | 1530.8 | 1529.8 | 14 |
| 2  | 243.1  |       |        | 225.1  | I   | 1418.8 | 709.9 | 1401.8 | 1400.8 | 13 |
| 3  | 371.2  |       | 354.2  | 353.2  | Q   | 1305.7 | 653.4 | 1288.7 | 1287.7 | 12 |
| 4  | 442.2  |       | 425.2  | 424.2  | A   | 1177.6 | 589.3 | 1160.6 | 1159.6 | 11 |
| 5  | 541.3  |       | 524.3  | 523.3  | V   | 1106.6 | 553.8 | 1089.6 | 1088.6 | 10 |
| 6  | 642.4  | 321.7 | 625.3  | 624.3  | T   | 1007.5 | 504.3 | 990.5  | 989.5  | 9  |
| 7  | 699.4  | 350.2 | 682.3  | 681.4  | G   | 906.5  | 453.7 | 889.5  | 888.5  | 8  |
| 8  | 813.4  | 407.2 | 796.4  | 795.4  | N   | 849.5  | 425.2 | 832.4  | 831.5  | 7  |
| 9  | 900.4  | 450.7 | 883.4  | 882.4  | S   | 735.4  | 368.2 | 718.4  | 717.4  | 6  |
| 10 | 1028.5 | 514.8 | 1011.5 | 1010.5 | Q   | 648.4  |       | 631.4  |        | 5  |
| 11 | 1127.6 | 564.3 | 1110.5 | 1109.6 | V   | 520.3  |       | 503.3  |        | 4  |
| 12 | 1274.6 | 637.8 | 1257.6 | 1256.6 | F   | 421.3  |       | 404.2  |        | 3  |
| 13 | 1373.7 | 687.4 | 1356.7 | 1355.7 | V   | 274.2  |       | 257.2  |        | 2  |
| 14 | 1547.8 | 774.4 | 1530.8 | 1529.8 | R   | 175.1  |       | 158.1  |        | 1  |

Gene symbol: Rnf141

Protein name: NOD-derived CD11c +ve dendritic cells cDNA, RIKEN full-length enriched library, clone:F630030D05 product:ring finger protein 141, full insert sequence

Protein accession numbers: IPI00454038

Peptide sequence: (R)ESGSLTYEEFLGR(V)

Exclusive (unique to this protein): TRUE

SEQUEST XCorr score: 2.14 SEQUEST DCn score: 0.582

Fix modifications: None

Variable modifications: None

charge: 2

Observed m/z: 744.3551

Actual minus calculated peptide mass (AMU): 0.0004883

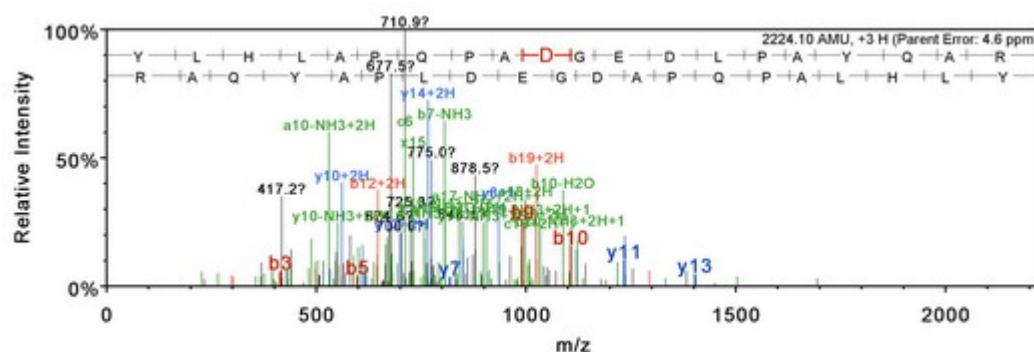

| B  | B ions | B+2H   | B-NH3  | B-H2O  | AA | Y ions | Y+2H   | Y-NH3  | Y-H2O  | Y  |
|----|--------|--------|--------|--------|----|--------|--------|--------|--------|----|
| 1  | 164.1  |        |        |        | Y  | 2225.1 | 1113.0 | 2208.1 | 2207.1 | 20 |
| 2  | 277.2  |        |        |        | L  | 2062.0 | 1031.5 | 2045.0 | 2044.0 | 19 |
| 3  | 414.2  | 207.6  |        |        | H  | 1949.0 | 975.0  | 1931.9 | 1930.9 | 18 |
| 4  | 527.3  | 264.1  |        |        | L  | 1811.9 | 906.5  | 1794.9 | 1793.9 | 17 |
| 5  | 598.3  | 299.7  |        |        | A  | 1698.8 | 849.9  | 1681.8 | 1680.8 | 16 |
| 6  | 695.4  | 348.2  |        |        | P  | 1627.8 | 814.4  | 1610.8 | 1609.8 | 15 |
| 7  | 823.5  | 412.2  | 806.4  |        | Q  | 1530.7 | 765.9  | 1513.7 | 1512.7 | 14 |
| 8  | 920.5  | 460.8  | 903.5  |        | P  | 1402.7 | 701.8  | 1385.6 | 1384.7 | 13 |
| 9  | 991.5  | 496.3  | 974.5  |        | A  | 1305.6 | 653.3  | 1288.6 | 1287.6 | 12 |
| 10 | 1106.6 | 553.8  | 1089.5 | 1088.5 | D  | 1234.6 | 617.8  | 1217.5 | 1216.6 | 11 |
| 11 | 1163.6 | 582.3  | 1146.6 | 1145.6 | G  | 1119.5 | 560.3  | 1102.5 | 1101.5 | 10 |
| 12 | 1292.6 | 646.8  | 1275.6 | 1274.6 | E  | 1062.5 | 531.8  | 1045.5 | 1044.5 | 9  |
| 13 | 1407.7 | 704.3  | 1390.6 | 1389.6 | D  | 933.5  | 467.2  | 916.5  | 915.5  | 8  |
| 14 | 1520.7 | 760.9  | 1503.7 | 1502.7 | L  | 818.5  | 409.7  | 801.4  |        | 7  |
| 15 | 1617.8 | 809.4  | 1600.8 | 1599.8 | P  | 705.4  | 353.2  | 688.3  |        | 6  |
| 16 | 1688.8 | 844.9  | 1671.8 | 1670.8 | A  | 608.3  |        | 591.3  |        | 5  |
| 17 | 1851.9 | 926.5  | 1834.9 | 1833.9 | Y  | 537.3  |        | 520.3  |        | 4  |
| 18 | 1980.0 | 990.5  | 1962.9 | 1961.9 | Q  | 374.2  |        | 357.2  |        | 3  |
| 19 | 2051.0 | 1026.0 | 2034.0 | 2033.0 | A  | 246.2  |        | 229.1  |        | 2  |
| 20 | 2225.1 | 1113.0 | 2208.1 | 2207.1 | R  | 175.1  |        | 158.1  |        | 1  |

Gene symbol: Rnf31

Protein name: Muscle protein 534 (Fragment)

Protein accession numbers: IPI00461570,IPI00468517,IPI00474602,IPI00762546,IPI00762888

Peptide sequence: (R)YLHLAPQPADGEDLPAYQAR(L)

Exclusive (unique to this protein): TRUE

SEQUEST XCorr score: 2.57 SEQUEST DCn score: 0.22

Fix modifications: None

Variable modifications: None

charge: 3

Observed m/z: 742.3751

Actual minus calculated peptide mass (AMU): 0.010253



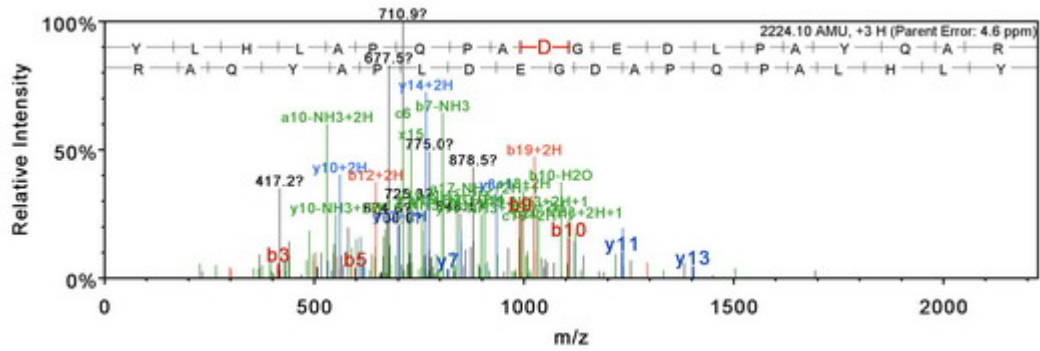

| B  | B ions | B+2H   | B-NH3  | B-H2O  | AA | Y ions | Y+2H   | Y-NH3  | Y-H2O  | Y  |
|----|--------|--------|--------|--------|----|--------|--------|--------|--------|----|
| 1  | 164.1  |        |        |        | Y  | 2225.1 | 1113.0 | 2208.1 | 2207.1 | 20 |
| 2  | 277.2  |        |        |        | L  | 2062.0 | 1031.5 | 2045.0 | 2044.0 | 19 |
| 3  | 414.2  | 207.6  |        |        | H  | 1949.0 | 975.0  | 1931.9 | 1930.9 | 18 |
| 4  | 527.3  | 264.1  |        |        | L  | 1811.9 | 906.5  | 1794.9 | 1793.9 | 17 |
| 5  | 598.3  | 299.7  |        |        | A  | 1698.8 | 849.9  | 1681.8 | 1680.8 | 16 |
| 6  | 695.4  | 348.2  |        |        | P  | 1627.8 | 814.4  | 1610.8 | 1609.8 | 15 |
| 7  | 823.5  | 412.2  | 806.4  |        | Q  | 1530.7 | 765.9  | 1513.7 | 1512.7 | 14 |
| 8  | 920.5  | 460.8  | 903.5  |        | P  | 1402.7 | 701.8  | 1385.6 | 1384.7 | 13 |
| 9  | 991.5  | 496.3  | 974.5  |        | A  | 1305.6 | 653.3  | 1288.6 | 1287.6 | 12 |
| 10 | 1106.6 | 553.8  | 1089.5 | 1088.5 | D  | 1234.6 | 617.8  | 1217.5 | 1216.6 | 11 |
| 11 | 1163.6 | 582.3  | 1146.6 | 1145.6 | G  | 1119.5 | 560.3  | 1102.5 | 1101.5 | 10 |
| 12 | 1292.6 | 646.8  | 1275.6 | 1274.6 | E  | 1062.5 | 531.8  | 1045.5 | 1044.5 | 9  |
| 13 | 1407.7 | 704.3  | 1390.6 | 1389.6 | D  | 933.5  | 467.2  | 916.5  | 915.5  | 8  |
| 14 | 1520.7 | 760.9  | 1503.7 | 1502.7 | L  | 818.5  | 409.7  | 801.4  |        | 7  |
| 15 | 1617.8 | 809.4  | 1600.8 | 1599.8 | P  | 705.4  | 353.2  | 688.3  |        | 6  |
| 16 | 1688.8 | 844.9  | 1671.8 | 1670.8 | A  | 608.3  |        | 591.3  |        | 5  |
| 17 | 1851.9 | 926.5  | 1834.9 | 1833.9 | Y  | 537.3  |        | 520.3  |        | 4  |
| 18 | 1980.0 | 990.5  | 1962.9 | 1961.9 | Q  | 374.2  |        | 357.2  |        | 3  |
| 19 | 2051.0 | 1026.0 | 2034.0 | 2033.0 | A  | 246.2  |        | 229.1  |        | 2  |
| 20 | 2225.1 | 1113.0 | 2208.1 | 2207.1 | R  | 175.1  |        | 158.1  |        | 1  |

Gene symbol: Rpa3

Protein name: Replication protein A 14 kDa subunit

Protein accession numbers: IPI00132128

Peptide sequence: (K)IINELPQFFPVGLPQHE

Exclusive (unique to this protein): TRUE

SEQUEST XCorr score: 2.11 SEQUEST DCn score: 0.655

Fix modifications: None

Variable modifications: None

charge: 2

Observed m/z: 989.5241

Actual minus calculated peptide mass (AMU): -0.003784

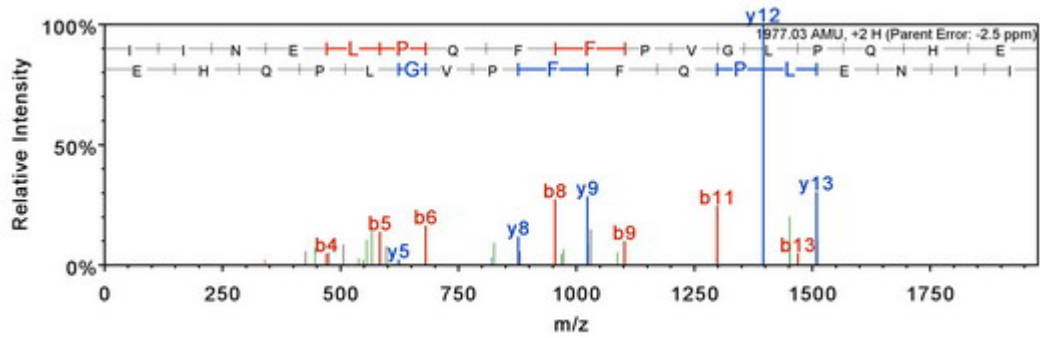

| B  | B ions | B+2H  | B-NH3  | B-H2O  | AA | Y ions | Y+2H  | Y-NH3  | Y-H2O  | Y  |
|----|--------|-------|--------|--------|----|--------|-------|--------|--------|----|
| 1  | 114.1  |       |        |        | I  | 1978.0 | 989.5 | 1961.0 | 1960.0 | 17 |
| 2  | 227.2  |       |        |        | I  | 1865.0 | 933.0 | 1847.9 | 1847.0 | 16 |
| 3  | 341.2  |       | 324.2  |        | N  | 1751.9 | 876.4 | 1734.9 | 1733.9 | 15 |
| 4  | 470.3  |       | 453.2  | 452.3  | E  | 1637.8 | 819.4 | 1620.8 | 1619.8 | 14 |
| 5  | 583.4  |       | 566.3  | 565.3  | L  | 1508.8 | 754.9 | 1491.8 | 1490.8 | 13 |
| 6  | 680.4  | 340.7 | 663.4  | 662.4  | P  | 1395.7 | 698.4 | 1378.7 | 1377.7 | 12 |
| 7  | 808.5  | 404.7 | 791.4  | 790.5  | Q  | 1298.7 | 649.8 | 1281.6 | 1280.6 | 11 |
| 8  | 955.5  | 478.3 | 938.5  | 937.5  | F  | 1170.6 | 585.8 | 1153.6 | 1152.6 | 10 |
| 9  | 1102.6 | 551.8 | 1085.6 | 1084.6 | F  | 1023.5 | 512.3 | 1006.5 | 1005.5 | 9  |
| 10 | 1199.7 | 600.3 | 1182.6 | 1181.6 | P  | 876.5  | 438.7 | 859.4  | 858.5  | 8  |
| 11 | 1298.7 | 649.9 | 1281.7 | 1280.7 | V  | 779.4  | 390.2 | 762.4  | 761.4  | 7  |
| 12 | 1355.7 | 678.4 | 1338.7 | 1337.7 | G  | 680.3  | 340.7 | 663.3  | 662.3  | 6  |
| 13 | 1468.8 | 734.9 | 1451.8 | 1450.8 | L  | 623.3  |       | 606.3  | 605.3  | 5  |
| 14 | 1565.9 | 783.4 | 1548.9 | 1547.9 | P  | 510.2  |       | 493.2  | 492.2  | 4  |
| 15 | 1693.9 | 847.5 | 1676.9 | 1675.9 | Q  | 413.2  |       | 396.2  | 395.2  | 3  |
| 16 | 1831.0 | 916.0 | 1814.0 | 1813.0 | H  | 285.1  |       |        | 267.1  | 2  |
| 17 | 1978.0 | 989.5 | 1961.0 | 1960.0 | E  | 148.1  |       |        | 130.1  | 1  |

Gene symbol: Rpe

Protein name: Unknown protein (Fragment)

Protein accession numbers: IPI00459757

Peptide sequence: (K)IGPSILNSDLANLGAELR(M)

Exclusive (unique to this protein): TRUE

SEQUEST XCorr score: 2.42 SEQUEST DCn score: 0.605

Fix modifications: C17: Carbamidomethyl (+57.02) Variable modifications: None

charge: 2

Observed m/z: 1007.0226

Actual minus calculated peptide mass (AMU): -0.0067152

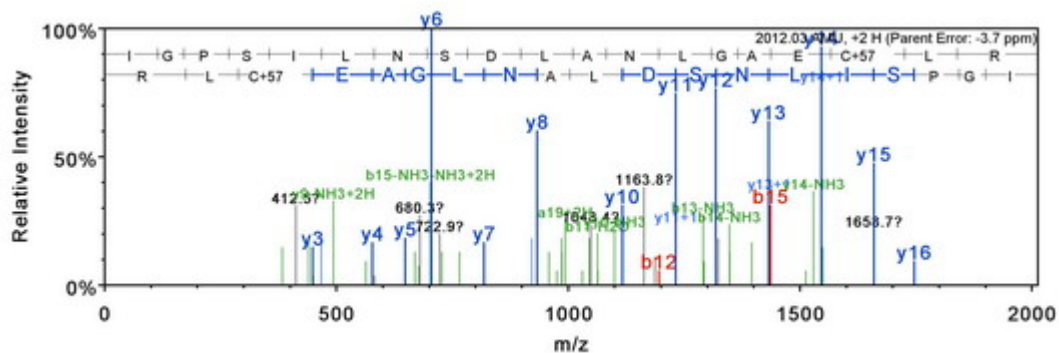

| B  | B Ions | B+2H   | B-NH3  | B-H2O  | AA   | Y Ions | Y+2H   | Y-NH3  | Y-H2O  | Y  |
|----|--------|--------|--------|--------|------|--------|--------|--------|--------|----|
| 1  | 114.1  |        |        |        | I    | 2013.0 | 1007.0 | 1996.0 | 1995.0 | 19 |
| 2  | 171.1  |        |        |        | G    | 1900.0 | 950.5  | 1882.9 | 1882.0 | 18 |
| 3  | 268.2  |        |        |        | P    | 1842.9 | 922.0  | 1825.9 | 1824.9 | 17 |
| 4  | 355.2  |        |        | 337.2  | S    | 1745.9 | 873.5  | 1728.9 | 1727.9 | 16 |
| 5  | 468.3  |        |        | 450.3  | I    | 1658.9 | 829.9  | 1641.8 | 1640.8 | 15 |
| 6  | 581.4  | 291.2  |        | 563.4  | L    | 1545.8 | 773.4  | 1528.7 | 1527.8 | 14 |
| 7  | 695.4  | 348.2  | 678.4  | 677.4  | N    | 1432.7 | 716.9  | 1415.7 | 1414.7 | 13 |
| 8  | 782.4  | 391.7  | 765.4  | 764.4  | S    | 1318.6 | 659.8  | 1301.6 | 1300.6 | 12 |
| 9  | 897.5  | 449.2  | 880.4  | 879.5  | D    | 1231.6 | 616.3  | 1214.6 | 1213.6 | 11 |
| 10 | 1010.6 | 505.8  | 993.5  | 992.5  | L    | 1116.6 | 558.8  | 1099.6 | 1098.6 | 10 |
| 11 | 1081.6 | 541.3  | 1064.6 | 1063.6 | A    | 1003.5 | 502.3  | 986.5  | 985.5  | 9  |
| 12 | 1195.6 | 598.3  | 1178.6 | 1177.6 | N    | 932.5  | 466.7  | 915.4  | 914.5  | 8  |
| 13 | 1308.7 | 654.9  | 1291.7 | 1290.7 | L    | 818.4  | 409.7  | 801.4  | 800.4  | 7  |
| 14 | 1365.7 | 683.4  | 1348.7 | 1347.7 | G    | 705.3  | 353.2  | 688.3  | 687.3  | 6  |
| 15 | 1436.8 | 718.9  | 1419.8 | 1418.8 | A    | 648.3  |        | 631.3  | 630.3  | 5  |
| 16 | 1565.8 | 783.4  | 1548.8 | 1547.8 | E    | 577.3  |        | 560.3  | 559.3  | 4  |
| 17 | 1725.9 | 863.4  | 1708.8 | 1707.8 | C+57 | 448.2  |        | 431.2  |        | 3  |
| 18 | 1838.9 | 920.0  | 1821.9 | 1820.9 | L    | 288.2  |        | 271.2  |        | 2  |
| 19 | 2013.0 | 1007.0 | 1996.0 | 1995.0 | R    | 175.1  |        | 158.1  |        | 1  |

Gene symbol: Rpl11

Protein name: 60S ribosomal protein L11

Protein accession numbers: IPI00331461,IPI00340036,IPI00474856,IPI00624735,IPI00626239

Peptide sequence: (K)VLEQLTGQTPVFSK(A)

Exclusive (unique to this protein): TRUE

SEQUEST XCorr score: 2.17 SEQUEST DCn score: 0.658

Fix modifications: None

Variable modifications: None

charge: 2

Observed m/z: 773.9287

Actual minus calculated peptide mass (AMU): 0.001343

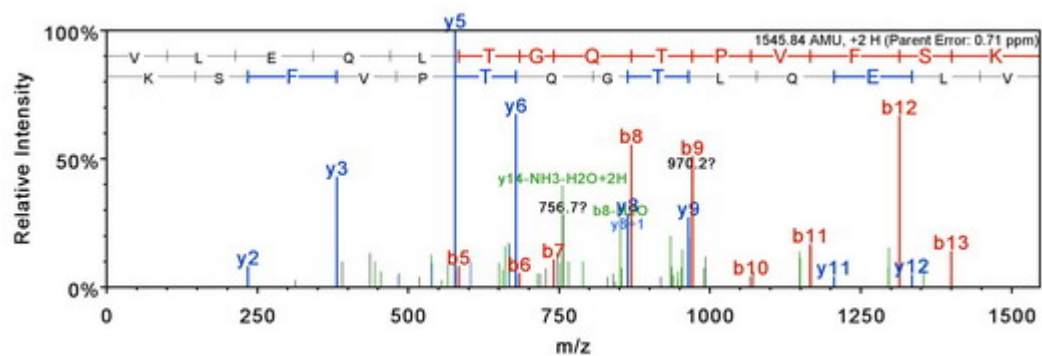

| B  | B Ions | B+2H  | B-NH3  | B-H2O  | AA | Y Ions | Y+2H  | Y-NH3  | Y-H2O  | Y  |
|----|--------|-------|--------|--------|----|--------|-------|--------|--------|----|
| 1  | 100.1  |       |        |        | V  | 1546.9 | 773.9 | 1529.8 | 1528.8 | 14 |
| 2  | 213.2  |       |        |        | L  | 1447.8 | 724.4 | 1430.8 | 1429.8 | 13 |
| 3  | 342.2  |       |        | 324.2  | E  | 1334.7 | 667.9 | 1317.7 | 1316.7 | 12 |
| 4  | 470.3  |       | 453.2  | 452.3  | Q  | 1205.7 | 603.3 | 1188.6 | 1187.6 | 11 |
| 5  | 583.4  |       | 566.3  | 565.3  | L  | 1077.6 | 539.3 | 1060.6 | 1059.6 | 10 |
| 6  | 684.4  | 342.7 | 667.4  | 666.4  | T  | 964.5  | 482.8 | 947.5  | 946.5  | 9  |
| 7  | 741.4  | 371.2 | 724.4  | 723.4  | G  | 863.5  | 432.2 | 846.4  | 845.5  | 8  |
| 8  | 869.5  | 435.2 | 852.5  | 851.5  | Q  | 806.4  | 403.7 | 789.4  | 788.4  | 7  |
| 9  | 970.5  | 485.8 | 953.5  | 952.5  | T  | 678.4  | 339.7 | 661.4  | 660.4  | 6  |
| 10 | 1067.6 | 534.3 | 1050.5 | 1049.6 | P  | 577.3  |       | 560.3  | 559.3  | 5  |
| 11 | 1166.6 | 583.8 | 1149.6 | 1148.6 | V  | 480.3  |       | 463.3  | 462.3  | 4  |
| 12 | 1313.7 | 657.4 | 1296.7 | 1295.7 | F  | 381.2  |       | 364.2  | 363.2  | 3  |
| 13 | 1400.7 | 700.9 | 1383.7 | 1382.7 | S  | 234.2  |       | 217.1  | 216.1  | 2  |
| 14 | 1546.9 | 773.9 | 1529.8 | 1528.8 | K  | 147.1  |       | 130.1  |        | 1  |

Gene symbol: Rpl13a

Protein name: 60S ribosomal protein L13a

Protein accession numbers: IPI00223217,IPI00654400

Peptide sequence: (R)CEGINISGNFYR(N)

Exclusive (unique to this protein): TRUE

SEQUEST XCorr score: 2.24 SEQUEST DCn score: 0.704

Fix modifications: C1: Carbamidomethyl (+57.02)Variable modifications: None

charge: 2

Observed m/z: 715.3269

Actual minus calculated peptide mass (AMU): -0.0074454

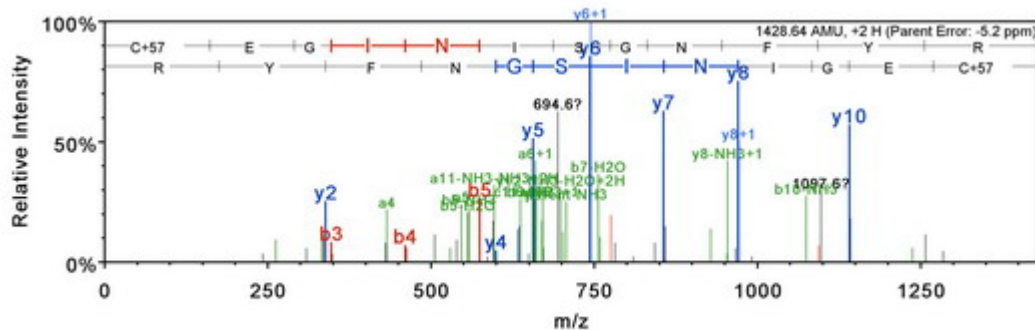

| B  | B Ions | B+2H  | B-NH3  | B-H2O  | AA   | Y Ions | Y+2H  | Y-NH3  | Y-H2O  | Y  |
|----|--------|-------|--------|--------|------|--------|-------|--------|--------|----|
| 1  | 161.0  |       |        |        | C+57 | 1429.7 | 715.3 | 1412.6 | 1411.6 | 12 |
| 2  | 290.1  |       |        | 272.1  | E    | 1269.6 | 635.3 | 1252.6 | 1251.6 | 11 |
| 3  | 347.1  |       |        | 329.1  | G    | 1140.6 | 570.8 | 1123.5 | 1122.6 | 10 |
| 4  | 460.2  |       |        | 442.2  | I    | 1083.6 | 542.3 | 1066.5 | 1065.5 | 9  |
| 5  | 574.2  |       | 557.2  | 556.2  | N    | 970.5  | 485.7 | 953.5  | 952.5  | 8  |
| 6  | 687.3  | 344.2 | 670.3  | 669.3  | I    | 856.4  | 428.7 | 839.4  | 838.4  | 7  |
| 7  | 774.4  | 387.7 | 757.3  | 756.3  | S    | 743.4  | 372.2 | 726.3  | 725.3  | 6  |
| 8  | 831.4  | 416.2 | 814.3  | 813.4  | G    | 656.3  |       | 639.3  |        | 5  |
| 9  | 945.4  | 473.2 | 928.4  | 927.4  | N    | 599.3  |       | 582.3  |        | 4  |
| 10 | 1092.5 | 546.7 | 1075.5 | 1074.5 | F    | 485.3  |       | 468.2  |        | 3  |
| 11 | 1255.5 | 628.3 | 1238.5 | 1237.5 | Y    | 338.2  |       | 321.2  |        | 2  |
| 12 | 1429.7 | 715.3 | 1412.6 | 1411.6 | R    | 175.1  |       | 158.1  |        | 1  |

Gene symbol: Rpl14  
 Protein name: 60S ribosomal protein L14  
 Protein accession numbers: IPI00133185,IPI00473728,IPI00848835  
 Peptide sequence: (K)LVAIVDVIDQNR(A)  
 Exclusive (unique to this protein): TRUE  
 SEQUEST XCorr score: 2.2 SEQUEST DCn score: 0.484  
 Fix modifications: None  
 Variable modifications: None  
 charge: 2 Observed m/z: 677.8852  
 Actual minus calculated peptide mass (AMU): -0.006958

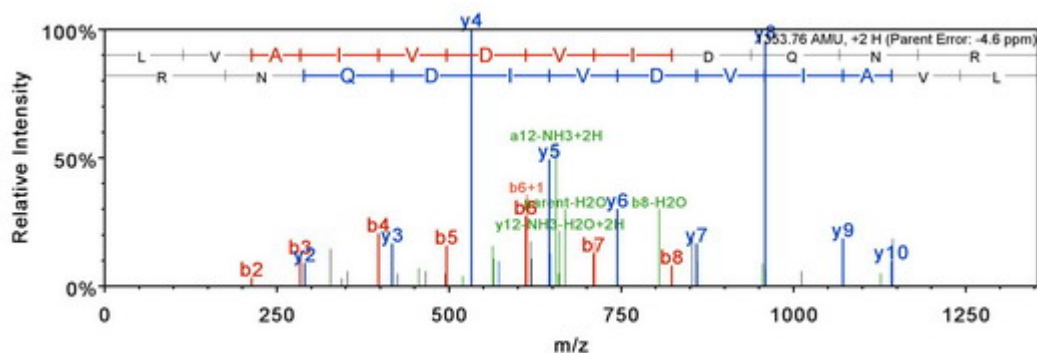

| B  | B ions | B+2H  | B-NH3  | B-H2O  | A,A | Y ions | Y+2H  | Y-NH3  | Y-H2O  | Y  |
|----|--------|-------|--------|--------|-----|--------|-------|--------|--------|----|
| 1  | 114.1  |       |        |        | L   | 1354.8 | 677.9 | 1337.7 | 1336.8 | 12 |
| 2  | 213.2  |       |        |        | V   | 1241.7 | 621.4 | 1224.7 | 1223.7 | 11 |
| 3  | 284.2  |       |        |        | A   | 1142.6 | 571.8 | 1125.6 | 1124.6 | 10 |
| 4  | 397.3  |       |        |        | I   | 1071.6 | 536.3 | 1054.5 | 1053.6 | 9  |
| 5  | 496.4  |       |        |        | V   | 958.5  | 479.8 | 941.5  | 940.5  | 8  |
| 6  | 611.4  | 306.2 |        | 593.4  | D   | 859.4  | 430.2 | 842.4  | 841.4  | 7  |
| 7  | 710.5  | 355.7 |        | 692.4  | V   | 744.4  | 372.7 | 727.4  | 726.4  | 6  |
| 8  | 823.5  | 412.3 |        | 805.5  | I   | 645.3  |       | 628.3  | 627.3  | 5  |
| 9  | 938.6  | 469.8 |        | 920.6  | D   | 532.3  |       | 515.2  | 514.2  | 4  |
| 10 | 1066.6 | 533.8 | 1049.6 | 1048.6 | Q   | 417.2  |       | 400.2  |        | 3  |
| 11 | 1180.7 | 590.8 | 1163.6 | 1162.7 | N   | 289.2  |       | 272.1  |        | 2  |
| 12 | 1354.8 | 677.9 | 1337.7 | 1336.8 | R   | 175.1  |       | 158.1  |        | 1  |

Gene symbol: Rpl19  
 Protein name: 60S ribosomal protein L19  
 Protein accession numbers:  
 IPI00122426,IPI00264398,IPI00354889,IPI00466604,IPI00648315,IPI00850221  
 Peptide sequence: (K)VWLDPNETNEIANANSR(Q)  
 Exclusive (unique to this protein): TRUE  
 SEQUEST XCorr score: 2.43 SEQUEST DCn score: 0.663  
 Fix modifications: None  
 Variable modifications: None  
 charge: 2 Observed m/z: 971.9629

Actual minus calculated peptide mass (AMU): -0.007813

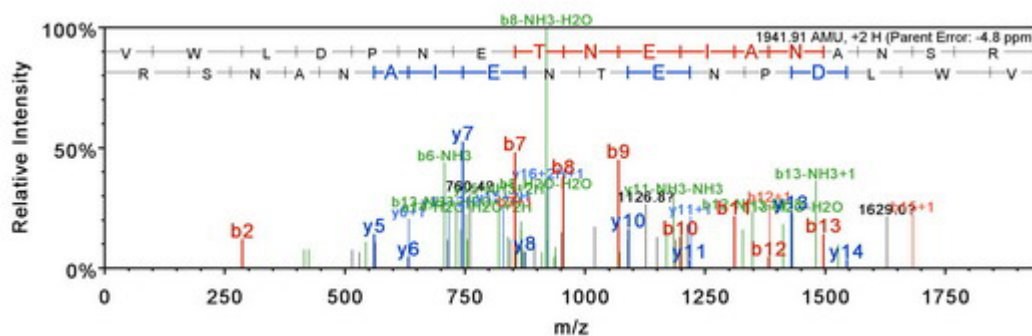

| B  | B ions | B+2H  | B-NH3  | B-H2O  | AA | Y ions | Y+2H  | Y-NH3  | Y-H2O  | Y  |
|----|--------|-------|--------|--------|----|--------|-------|--------|--------|----|
| 1  | 100.1  |       |        |        | V  | 1942.9 | 972.0 | 1925.9 | 1924.9 | 17 |
| 2  | 286.2  |       |        |        | W  | 1843.9 | 922.4 | 1826.8 | 1825.9 | 16 |
| 3  | 399.2  |       |        |        | L  | 1657.8 | 829.4 | 1640.8 | 1639.8 | 15 |
| 4  | 514.3  |       |        | 496.3  | D  | 1544.7 | 772.9 | 1527.7 | 1526.7 | 14 |
| 5  | 611.3  |       |        | 593.3  | P  | 1429.7 | 715.3 | 1412.6 | 1411.7 | 13 |
| 6  | 725.4  | 363.2 | 708.3  | 707.4  | N  | 1332.6 | 666.8 | 1315.6 | 1314.6 | 12 |
| 7  | 854.4  | 427.7 | 837.4  | 836.4  | E  | 1218.6 | 609.8 | 1201.5 | 1200.6 | 11 |
| 8  | 955.5  | 478.2 | 938.4  | 937.4  | T  | 1089.5 | 545.3 | 1072.5 | 1071.5 | 10 |
| 9  | 1069.5 | 535.3 | 1052.5 | 1051.5 | N  | 988.5  | 494.7 | 971.5  | 970.5  | 9  |
| 10 | 1198.5 | 599.8 | 1181.5 | 1180.5 | E  | 874.4  | 437.7 | 857.4  | 856.4  | 8  |
| 11 | 1311.6 | 656.3 | 1294.6 | 1293.6 | I  | 745.4  | 373.2 | 728.4  | 727.4  | 7  |
| 12 | 1382.7 | 691.8 | 1365.6 | 1364.7 | A  | 632.3  | 316.7 | 615.3  | 614.3  | 6  |
| 13 | 1496.7 | 748.9 | 1479.7 | 1478.7 | N  | 561.3  |       | 544.3  | 543.3  | 5  |
| 14 | 1567.7 | 784.4 | 1550.7 | 1549.7 | A  | 447.2  |       | 430.2  | 429.2  | 4  |
| 15 | 1681.8 | 841.4 | 1664.8 | 1663.8 | N  | 376.2  |       | 359.2  | 358.2  | 3  |
| 16 | 1768.8 | 884.9 | 1751.8 | 1750.8 | S  | 262.1  |       | 245.1  | 244.1  | 2  |
| 17 | 1942.9 | 972.0 | 1925.9 | 1924.9 | R  | 175.1  |       | 158.1  |        | 1  |

Gene symbol: Rpl23

Protein name: 60S ribosomal protein L23

Protein accession numbers: IPI00139780,IPI00849782

Peptide sequence: (R)ISLGLPVGAVINCADNTGAK(N)

Exclusive (unique to this protein): TRUE

SEQUEST XCorr score: 3.3 SEQUEST DCn score: 0.641

Fix modifications: C13: Carbamidomethyl (+57.02) Variable modifications: None

charge: 2

Observed m/z: 985.5203

Actual minus calculated peptide mass (AMU): -0.005493

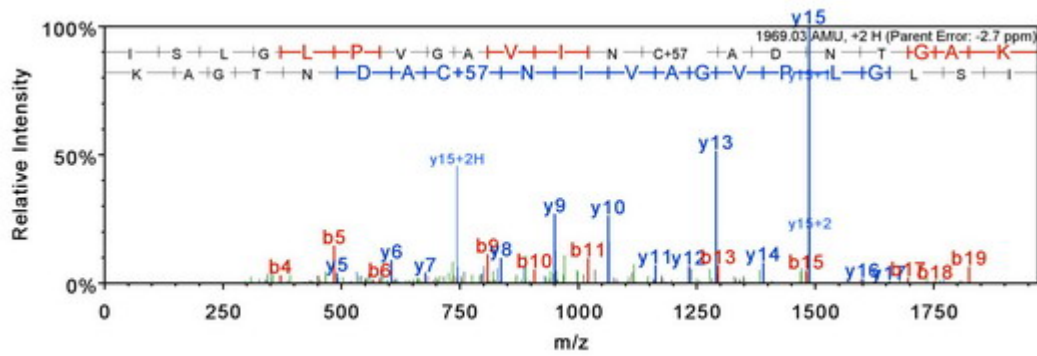

| B  | B Ions | B+2H  | B-NH3  | B-H2O  | AA   | Y Ions | Y+2H  | Y-NH3  | Y-H2O  | Y  |
|----|--------|-------|--------|--------|------|--------|-------|--------|--------|----|
| 1  | 114.1  |       |        |        | I    | 1970.0 | 985.5 | 1953.0 | 1952.0 | 20 |
| 2  | 201.1  |       |        | 183.1  | S    | 1857.0 | 929.0 | 1839.9 | 1838.9 | 19 |
| 3  | 314.2  |       |        | 296.2  | L    | 1769.9 | 885.5 | 1752.9 | 1751.9 | 18 |
| 4  | 371.2  |       |        | 353.2  | G    | 1656.8 | 828.9 | 1639.8 | 1638.8 | 17 |
| 5  | 484.3  |       |        | 466.3  | L    | 1599.8 | 800.4 | 1582.8 | 1581.8 | 16 |
| 6  | 581.4  | 291.2 |        | 563.4  | P    | 1486.7 | 743.9 | 1469.7 | 1468.7 | 15 |
| 7  | 680.4  | 340.7 |        | 662.4  | V    | 1389.7 | 695.3 | 1372.7 | 1371.7 | 14 |
| 8  | 737.5  | 369.2 |        | 719.5  | G    | 1290.6 | 645.8 | 1273.6 | 1272.6 | 13 |
| 9  | 808.5  | 404.8 |        | 790.5  | A    | 1233.6 | 617.3 | 1216.6 | 1215.6 | 12 |
| 10 | 907.6  | 454.3 |        | 889.6  | V    | 1162.5 | 581.8 | 1145.5 | 1144.5 | 11 |
| 11 | 1020.7 | 510.8 |        | 1002.6 | I    | 1063.5 | 532.3 | 1046.5 | 1045.5 | 10 |
| 12 | 1134.7 | 567.9 | 1117.7 | 1116.7 | N    | 950.4  | 475.7 | 933.4  | 932.4  | 9  |
| 13 | 1294.7 | 647.9 | 1277.7 | 1276.7 | C+57 | 836.4  | 418.7 | 819.3  | 818.4  | 8  |
| 14 | 1365.8 | 683.4 | 1348.7 | 1347.8 | A    | 676.3  | 338.7 | 659.3  | 658.3  | 7  |
| 15 | 1480.8 | 740.9 | 1463.8 | 1462.8 | D    | 605.3  | 303.2 | 588.3  | 587.3  | 6  |
| 16 | 1594.8 | 797.9 | 1577.8 | 1576.8 | N    | 490.3  |       | 473.2  | 472.3  | 5  |
| 17 | 1695.9 | 848.4 | 1678.9 | 1677.9 | T    | 376.2  |       | 359.2  | 358.2  | 4  |
| 18 | 1752.9 | 877.0 | 1735.9 | 1734.9 | G    | 275.2  |       | 258.1  |        | 3  |
| 19 | 1823.9 | 912.5 | 1806.9 | 1805.9 | A    | 218.2  |       | 201.1  |        | 2  |
| 20 | 1970.0 | 985.5 | 1953.0 | 1952.0 | K    | 147.1  |       | 130.1  |        | 1  |

Gene symbol: Rpl6

Protein name: 60S ribosomal protein L6

Protein accession numbers: IPI00313222,IPI00626312

Peptide sequence: (K)QLDSGLLLVTGPLVINR(V)

Exclusive (unique to this protein): TRUE

SEQUEST XCorr score: 2.37 SEQUEST DCn score: 0.76

Fix modifications: None

Variable modifications: None

charge: 2

Observed m/z: 904.537

Actual minus calculated peptide mass (AMU): 0.001343

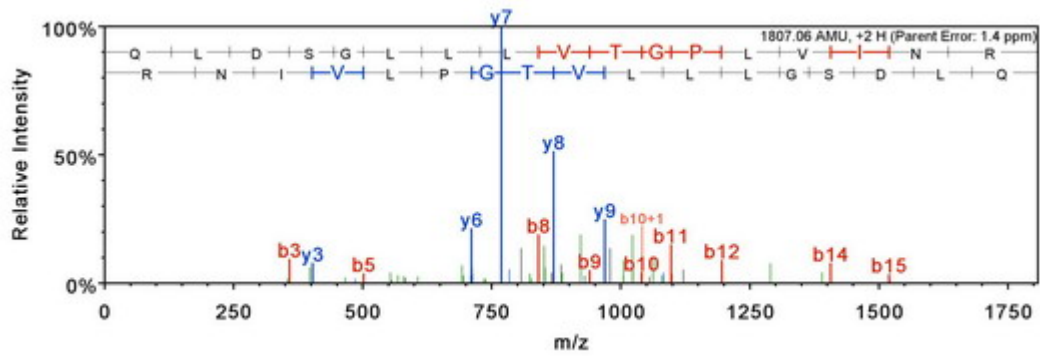

| B  | B Ions | B+2H  | B-NH3  | B-H2O  | AA | Y Ions | Y+2H  | Y-NH3  | Y-H2O  | Y  |
|----|--------|-------|--------|--------|----|--------|-------|--------|--------|----|
| 1  | 129.1  |       | 112.0  |        | Q  | 1808.1 | 904.5 | 1791.0 | 1790.1 | 17 |
| 2  | 242.2  |       | 225.1  |        | L  | 1680.0 | 840.5 | 1663.0 | 1662.0 | 16 |
| 3  | 357.2  |       | 340.2  | 339.2  | D  | 1566.9 | 784.0 | 1549.9 | 1548.9 | 15 |
| 4  | 444.2  |       | 427.2  | 426.2  | S  | 1451.9 | 726.5 | 1434.9 | 1433.9 | 14 |
| 5  | 501.2  |       | 484.2  | 483.2  | G  | 1364.9 | 682.9 | 1347.8 | 1346.9 | 13 |
| 6  | 614.3  | 307.7 | 597.3  | 596.3  | L  | 1307.8 | 654.4 | 1290.8 | 1289.8 | 12 |
| 7  | 727.4  | 364.2 | 710.4  | 709.4  | L  | 1194.8 | 597.9 | 1177.7 | 1176.8 | 11 |
| 8  | 840.5  | 420.8 | 823.5  | 822.5  | L  | 1081.7 | 541.3 | 1064.7 | 1063.7 | 10 |
| 9  | 939.6  | 470.3 | 922.5  | 921.5  | V  | 968.6  | 484.8 | 951.6  | 950.6  | 9  |
| 10 | 1040.6 | 520.8 | 1023.6 | 1022.6 | T  | 869.5  | 435.3 | 852.5  | 851.5  | 8  |
| 11 | 1097.6 | 549.3 | 1080.6 | 1079.6 | G  | 768.5  | 384.7 | 751.5  |        | 7  |
| 12 | 1194.7 | 597.8 | 1177.7 | 1176.7 | P  | 711.5  | 356.2 | 694.4  |        | 6  |
| 13 | 1307.8 | 654.4 | 1290.7 | 1289.8 | L  | 614.4  |       | 597.4  |        | 5  |
| 14 | 1406.8 | 703.9 | 1389.8 | 1388.8 | V  | 501.3  |       | 484.3  |        | 4  |
| 15 | 1519.9 | 760.5 | 1502.9 | 1501.9 | I  | 402.3  |       | 385.2  |        | 3  |
| 16 | 1634.0 | 817.5 | 1616.9 | 1615.9 | N  | 289.2  |       | 272.1  |        | 2  |
| 17 | 1808.1 | 904.5 | 1791.0 | 1790.1 | R  | 175.1  |       | 158.1  |        | 1  |

Gene symbol: Rpl9

Protein name: 60S ribosomal protein L9

Protein accession numbers: IPI00122413,IPI00407917,IPI00473762,IPI00850681

Peptide sequence: (K)TILSNQTVTDIPENVEITLK(G)

Exclusive (unique to this protein): TRUE

SEQUEST XCorr score: 2.14 SEQUEST DCn score: 0.46

Fix modifications: None

Variable modifications: None

charge: 2

Observed m/z: 1064.0779

Actual minus calculated peptide mass (AMU): -0.0070758



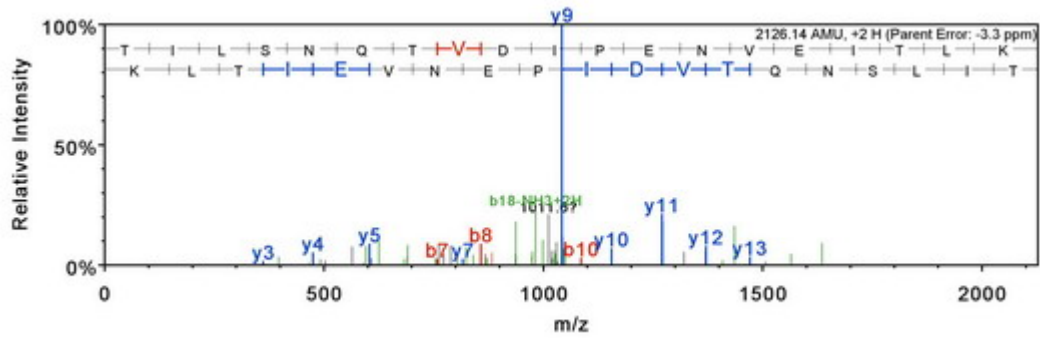

| B  | B ions | B+2H   | B-NH3  | B-H2O  | AA | Y ions | Y+2H   | Y-NH3  | Y-H2O  | Y  |
|----|--------|--------|--------|--------|----|--------|--------|--------|--------|----|
| 1  | 102.1  |        |        | 84.0   | T  | 2127.2 | 1064.1 | 2110.1 | 2109.1 | 19 |
| 2  | 215.1  |        |        | 197.1  | I  | 2026.1 | 1013.6 | 2009.1 | 2008.1 | 18 |
| 3  | 328.2  |        |        | 310.2  | L  | 1913.0 | 957.0  | 1896.0 | 1895.0 | 17 |
| 4  | 415.3  |        |        | 397.3  | S  | 1799.9 | 900.5  | 1782.9 | 1781.9 | 16 |
| 5  | 529.3  |        | 512.3  | 511.3  | N  | 1712.9 | 857.0  | 1695.9 | 1694.9 | 15 |
| 6  | 657.4  | 329.2  | 640.3  | 639.4  | Q  | 1598.9 | 799.9  | 1581.8 | 1580.9 | 14 |
| 7  | 758.4  | 379.7  | 741.4  | 740.4  | T  | 1470.8 | 735.9  | 1453.8 | 1452.8 | 13 |
| 8  | 857.5  | 429.2  | 840.5  | 839.5  | V  | 1369.8 | 685.4  | 1352.7 | 1351.8 | 12 |
| 9  | 972.5  | 486.8  | 955.5  | 954.5  | D  | 1270.7 | 635.9  | 1253.7 | 1252.7 | 11 |
| 10 | 1085.6 | 543.3  | 1068.6 | 1067.6 | I  | 1155.7 | 578.3  | 1138.6 | 1137.7 | 10 |
| 11 | 1182.6 | 591.8  | 1165.6 | 1164.6 | P  | 1042.6 | 521.8  | 1025.5 | 1024.6 | 9  |
| 12 | 1311.7 | 656.3  | 1294.7 | 1293.7 | E  | 945.5  | 473.3  | 928.5  | 927.5  | 8  |
| 13 | 1425.7 | 713.4  | 1408.7 | 1407.7 | N  | 816.5  | 408.8  | 799.5  | 798.5  | 7  |
| 14 | 1524.8 | 762.9  | 1507.8 | 1506.8 | V  | 702.4  | 351.7  | 685.4  | 684.4  | 6  |
| 15 | 1653.8 | 827.4  | 1636.8 | 1635.8 | E  | 603.4  |        | 586.4  | 585.4  | 5  |
| 16 | 1766.9 | 884.0  | 1749.9 | 1748.9 | I  | 474.3  |        | 457.3  | 456.3  | 4  |
| 17 | 1868.0 | 934.5  | 1850.9 | 1850.0 | T  | 361.3  |        | 344.2  | 343.2  | 3  |
| 18 | 1981.1 | 991.0  | 1964.0 | 1963.0 | L  | 260.2  |        | 243.2  |        | 2  |
| 19 | 2127.2 | 1064.1 | 2110.1 | 2109.1 | K  | 147.1  |        | 130.1  |        | 1  |

Gene symbol: Rps11

Protein name: Adult male cerebellum cDNA, RIKEN full-length enriched library, clone:1500004H08 product:ribosomal protein S11, full insert sequence

Protein accession numbers: IPI00117569

Peptide sequence: (R)DVQIGDIVTVGECRPLSK(T)

Exclusive (unique to this protein): TRUE

SEQUEST XCorr score: 2.13 SEQUEST DCn score: 0.67

Fix modifications: C13: Carbamidomethyl (+57.02) Variable modifications: None

charge: 2 Observed m/z: 993.5176

Actual minus calculated peptide mass (AMU): -0.005859

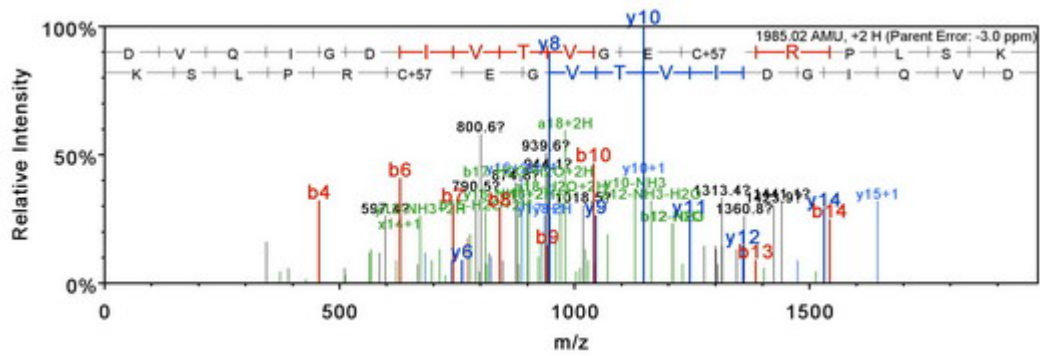

| B  | B ions | B+2H  | B-NH3  | B-H2O  | AA   | Y ions | Y+2H  | Y-NH3  | Y-H2O  | Y  |
|----|--------|-------|--------|--------|------|--------|-------|--------|--------|----|
| 1  | 116.0  |       |        | 98.0   | D    | 1986.0 | 993.5 | 1969.0 | 1968.0 | 18 |
| 2  | 215.1  |       |        | 197.1  | V    | 1871.0 | 936.0 | 1854.0 | 1853.0 | 17 |
| 3  | 343.2  |       | 326.1  | 325.2  | Q    | 1771.9 | 886.5 | 1754.9 | 1753.9 | 16 |
| 4  | 456.3  |       | 439.2  | 438.2  | I    | 1643.9 | 822.4 | 1626.9 | 1625.9 | 15 |
| 5  | 513.3  |       | 496.2  | 495.3  | G    | 1530.8 | 765.9 | 1513.8 | 1512.8 | 14 |
| 6  | 628.3  | 314.7 | 611.3  | 610.3  | D    | 1473.8 | 737.4 | 1456.8 | 1455.8 | 13 |
| 7  | 741.4  | 371.2 | 724.4  | 723.4  | I    | 1358.8 | 679.9 | 1341.7 | 1340.7 | 12 |
| 8  | 840.5  | 420.7 | 823.4  | 822.4  | V    | 1245.7 | 623.3 | 1228.6 | 1227.7 | 11 |
| 9  | 941.5  | 471.3 | 924.5  | 923.5  | T    | 1146.6 | 573.8 | 1129.6 | 1128.6 | 10 |
| 10 | 1040.6 | 520.8 | 1023.5 | 1022.6 | V    | 1045.5 | 523.3 | 1028.5 | 1027.5 | 9  |
| 11 | 1097.6 | 549.3 | 1080.6 | 1079.6 | G    | 946.5  | 473.7 | 929.5  | 928.5  | 8  |
| 12 | 1226.6 | 613.8 | 1209.6 | 1208.6 | E    | 889.5  | 445.2 | 872.4  | 871.5  | 7  |
| 13 | 1386.7 | 693.8 | 1369.6 | 1368.7 | C+57 | 760.4  | 380.7 | 743.4  | 742.4  | 6  |
| 14 | 1542.8 | 771.9 | 1525.7 | 1524.8 | R    | 600.4  | 300.7 | 583.4  | 582.4  | 5  |
| 15 | 1639.8 | 820.4 | 1622.8 | 1621.8 | P    | 444.3  |       | 427.3  | 426.3  | 4  |
| 16 | 1752.9 | 877.0 | 1735.9 | 1734.9 | L    | 347.2  |       | 330.2  | 329.2  | 3  |
| 17 | 1839.9 | 920.5 | 1822.9 | 1821.9 | S    | 234.2  |       | 217.1  | 216.1  | 2  |
| 18 | 1986.0 | 993.5 | 1969.0 | 1968.0 | K    | 147.1  |       | 130.1  |        | 1  |

Gene symbol: Rps13;EG625298

Protein name: 40S ribosomal protein S13

Protein accession numbers: IPI00125901,IPI00673997,IPI00751092

Peptide sequence: (K)GLTPSQIGVILR(D)

Exclusive (unique to this protein): TRUE

SEQUEST XCorr score: 2.56 SEQUEST DCn score: 0.48

Fix modifications: None

Variable modifications: None

charge: 2

Observed m/z: 627.3795

Actual minus calculated peptide mass (AMU): -0.007202

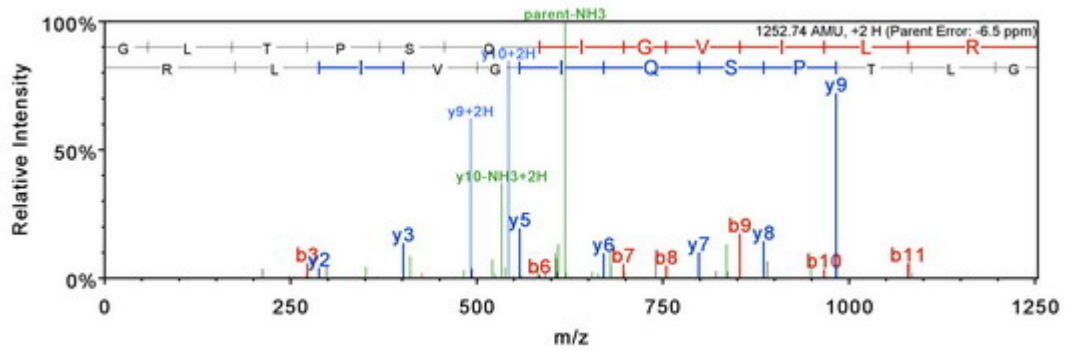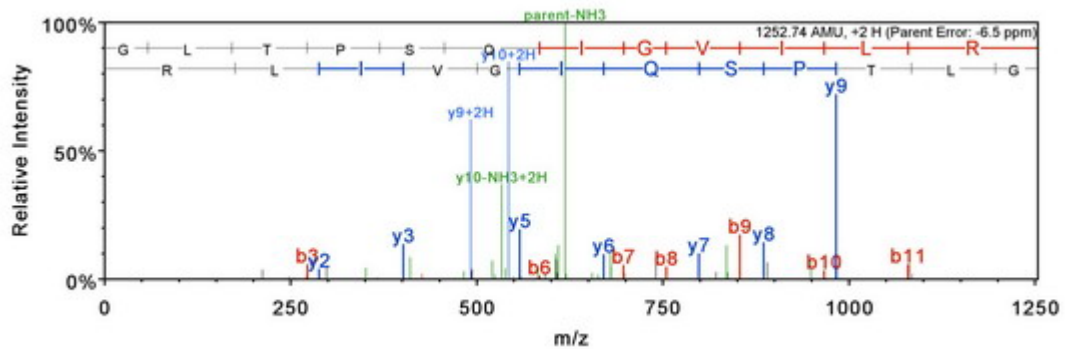

Gene symbol: Rps19

Protein name: 40S ribosomal protein S19

Protein accession numbers: IPI00113241,IPI00125787,IPI00665513

Peptide sequence: (K)ELAPYDENWFYTR(A)

Exclusive (unique to this protein): TRUE

SEQUEST XCorr score: 2.87 SEQUEST DCn score: 0.662

Fix modifications: None

Variable modifications: None

charge: 2

Observed m/z: 852.3865

Actual minus calculated peptide mass (AMU): -0.005249

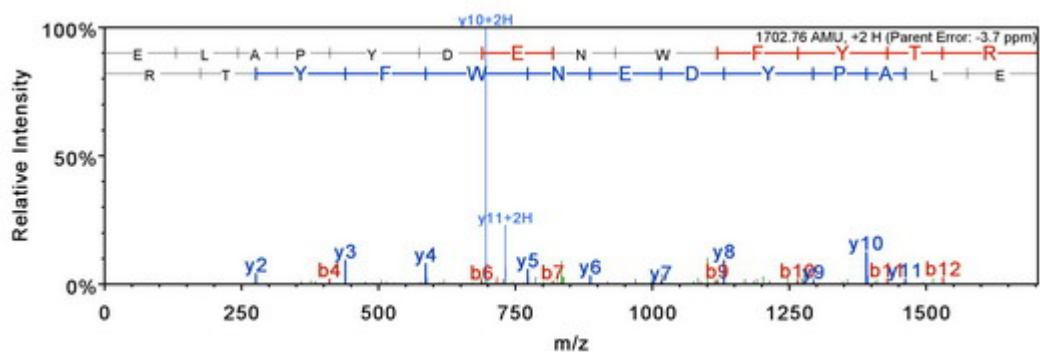

| B  | B ions | B+2H  | B-NH3  | B-H2O  | AA | Y ions | Y+2H  | Y-NH3  | Y-H2O  | Y  |
|----|--------|-------|--------|--------|----|--------|-------|--------|--------|----|
| 1  | 130.1  |       |        | 112.0  | E  | 1703.8 | 852.4 | 1686.7 | 1685.8 | 13 |
| 2  | 243.1  |       |        | 225.1  | L  | 1574.7 | 787.9 | 1557.7 | 1556.7 | 12 |
| 3  | 314.2  |       |        | 296.2  | A  | 1461.6 | 731.3 | 1444.6 | 1443.6 | 11 |
| 4  | 411.2  |       |        | 393.2  | P  | 1390.6 | 695.8 | 1373.6 | 1372.6 | 10 |
| 5  | 574.3  |       |        | 556.3  | Y  | 1293.5 | 647.3 | 1276.5 | 1275.5 | 9  |
| 6  | 689.3  | 345.2 |        | 671.3  | D  | 1130.5 | 565.8 | 1113.5 | 1112.5 | 8  |
| 7  | 818.4  | 409.7 |        | 800.4  | E  | 1015.5 | 508.2 | 998.4  | 997.5  | 7  |
| 8  | 932.4  | 466.7 | 915.4  | 914.4  | N  | 886.4  | 443.7 | 869.4  | 868.4  | 6  |
| 9  | 1118.5 | 559.7 | 1101.5 | 1100.5 | W  | 772.4  |       | 755.4  | 754.4  | 5  |
| 10 | 1265.5 | 633.3 | 1248.5 | 1247.5 | F  | 586.3  |       | 569.3  | 568.3  | 4  |
| 11 | 1428.6 | 714.8 | 1411.6 | 1410.6 | Y  | 439.2  |       | 422.2  | 421.2  | 3  |
| 12 | 1529.7 | 765.3 | 1512.6 | 1511.7 | T  | 276.2  |       | 259.1  | 258.2  | 2  |
| 13 | 1703.8 | 852.4 | 1686.7 | 1685.8 | R  | 175.1  |       | 158.1  |        | 1  |

Gene symbol: Rps20

Protein name: 40S ribosomal protein S20

Protein accession numbers: IPI00323819

Peptide sequence: (R)LIDLHSPSEIVK(Q)

Exclusive (unique to this protein): TRUE

SEQUEST XCorr score: 2.24 SEQUEST DCn score: 0.503

Fix modifications: None

Variable modifications: None

charge: 2

Observed m/z: 675.8857

Actual minus calculated peptide mass (AMU): 0.0001221

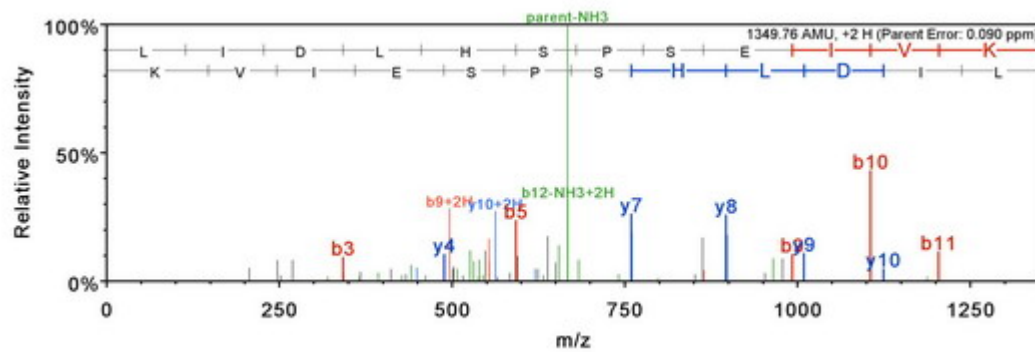

| B  | B ions | B+2H  | B-NH3  | B-H2O  | AA | Y ions | Y+2H  | Y-NH3  | Y-H2O  | Y  |
|----|--------|-------|--------|--------|----|--------|-------|--------|--------|----|
| 1  | 114.1  |       |        |        | L  | 1350.8 | 675.9 | 1333.7 | 1332.8 | 12 |
| 2  | 227.2  |       |        |        | I  | 1237.7 | 619.3 | 1220.7 | 1219.7 | 11 |
| 3  | 342.2  |       |        | 324.2  | D  | 1124.6 | 562.8 | 1107.6 | 1106.6 | 10 |
| 4  | 455.3  |       |        | 437.3  | L  | 1009.6 | 505.3 | 992.5  | 991.6  | 9  |
| 5  | 592.4  | 296.7 |        | 574.3  | H  | 896.5  | 448.8 | 879.5  | 878.5  | 8  |
| 6  | 679.4  | 340.2 |        | 661.4  | S  | 759.4  | 380.2 | 742.4  | 741.4  | 7  |
| 7  | 776.4  | 388.7 |        | 758.4  | P  | 672.4  | 336.7 | 655.4  | 654.4  | 6  |
| 8  | 863.5  | 432.2 |        | 845.5  | S  | 575.3  |       | 558.3  | 557.3  | 5  |
| 9  | 992.5  | 496.8 |        | 974.5  | E  | 488.3  |       | 471.3  | 470.3  | 4  |
| 10 | 1105.6 | 553.3 |        | 1087.6 | I  | 359.3  |       | 342.2  |        | 3  |
| 11 | 1204.7 | 602.8 |        | 1186.7 | V  | 246.2  |       | 229.2  |        | 2  |
| 12 | 1350.8 | 675.9 | 1333.7 | 1332.8 | K  | 147.1  |       | 130.1  |        | 1  |

Gene symbol: Rps23

Protein name: 11 days embryo whole body cDNA, RIKEN full-length enriched library, clone:2700086E01 product:ribosomal protein S23, full insert sequence

Protein accession numbers: IPI00131357,IPI00605025,IPI00750216,IPI00761494,IPI00762201

Peptide sequence: (K)VANVSLALYK(G)

Exclusive (unique to this protein): TRUE

SEQUEST XCorr score: 2.47 SEQUEST DCn score: 0.629

Fix modifications: None

Variable modifications: None

charge: 2

Observed m/z: 595.8579

Actual minus calculated peptide mass (AMU): -0.006958

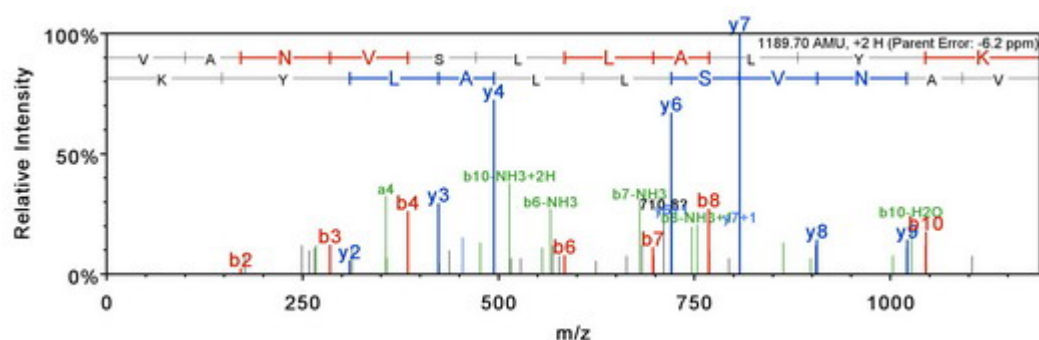

| B  | B ions | B+2H  | B-NH3  | B-H2O  | AA | Y ions | Y+2H  | Y-NH3  | Y-H2O  | Y  |
|----|--------|-------|--------|--------|----|--------|-------|--------|--------|----|
| 1  | 100.1  |       |        |        | V  | 1190.7 | 595.9 | 1173.7 | 1172.7 | 11 |
| 2  | 171.1  |       |        |        | A  | 1091.7 | 546.3 | 1074.6 | 1073.6 | 10 |
| 3  | 285.2  |       | 268.1  |        | N  | 1020.6 | 510.8 | 1003.6 | 1002.6 | 9  |
| 4  | 384.2  |       | 367.2  |        | V  | 906.6  | 453.8 | 889.5  | 888.6  | 8  |
| 5  | 471.3  |       | 454.2  | 453.3  | S  | 807.5  | 404.3 | 790.5  | 789.5  | 7  |
| 6  | 584.3  | 292.7 | 567.3  | 566.3  | L  | 720.5  | 360.7 | 703.4  |        | 6  |
| 7  | 697.4  | 349.2 | 680.4  | 679.4  | L  | 607.4  |       | 590.4  |        | 5  |
| 8  | 768.5  | 384.7 | 751.4  | 750.5  | A  | 494.3  |       | 477.3  |        | 4  |
| 9  | 881.6  | 441.3 | 864.5  | 863.5  | L  | 423.3  |       | 406.2  |        | 3  |
| 10 | 1044.6 | 522.8 | 1027.6 | 1026.6 | Y  | 310.2  |       | 293.2  |        | 2  |
| 11 | 1190.7 | 595.9 | 1173.7 | 1172.7 | K  | 147.1  |       | 130.1  |        | 1  |

Gene symbol: Rps4x

Protein name: 40S ribosomal protein S4, X isoform

Protein accession numbers: IPI00331092,IPI00662162,IPI00752798

Peptide sequence: (R)LSNIFVIGK(G)

Exclusive (unique to this protein): TRUE

SEQUEST XCorr score: 2.01 SEQUEST DCn score: 0.45

Fix modifications: None

Variable modifications: None

charge: 2

Observed m/z: 495.8017

Actual minus calculated peptide mass (AMU): -0.003296

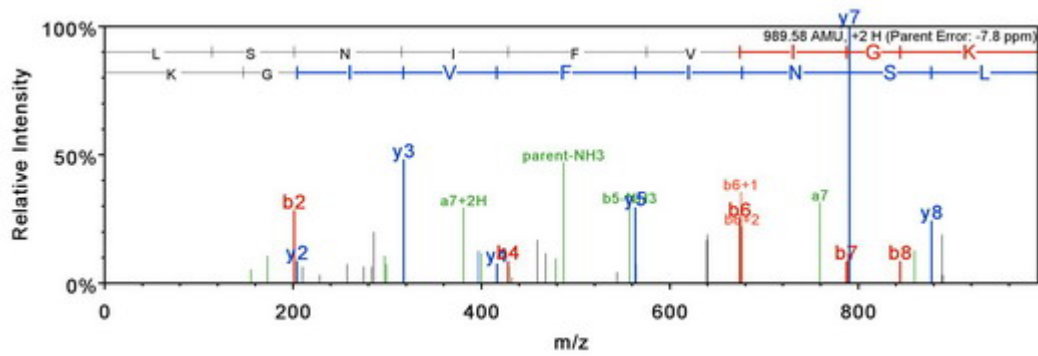

| B | B ions | B+2H  | B-NH3 | B-H2O | AA | Y ions | Y+2H  | Y-NH3 | Y-H2O | Y |
|---|--------|-------|-------|-------|----|--------|-------|-------|-------|---|
| 1 | 114.1  |       |       |       | L  | 990.6  | 495.8 | 973.6 | 972.6 | 9 |
| 2 | 201.1  |       |       | 183.1 | S  | 877.5  | 439.3 | 860.5 | 859.5 | 8 |
| 3 | 315.2  |       | 298.1 | 297.2 | N  | 790.5  | 395.8 | 773.5 |       | 7 |
| 4 | 428.3  |       | 411.2 | 410.2 | I  | 676.4  | 338.7 | 659.4 |       | 6 |
| 5 | 575.3  |       | 558.3 | 557.3 | F  | 563.4  |       | 546.3 |       | 5 |
| 6 | 674.4  | 337.7 | 657.4 | 656.4 | V  | 416.3  |       | 399.3 |       | 4 |
| 7 | 787.5  | 394.2 | 770.5 | 769.5 | I  | 317.2  |       | 300.2 |       | 3 |
| 8 | 844.5  | 422.8 | 827.5 | 826.5 | G  | 204.1  |       | 187.1 |       | 2 |
| 9 | 990.6  | 495.8 | 973.6 | 972.6 | K  | 147.1  |       | 130.1 |       | 1 |

Gene symbol: Rps5

Protein name: 40S ribosomal protein S5

Protein accession numbers: IPI00125521

Peptide sequence: (R)VNQAIWLLCTGAR(E)

Exclusive (unique to this protein): TRUE

SEQUEST XCorr score: 2.04 SEQUEST DCn score: 0.606

Fix modifications: C9: Carbamidomethyl (+57.02) Variable modifications: None

charge: 2

Observed m/z: 751.4026

Actual minus calculated peptide mass (AMU): 0.002441

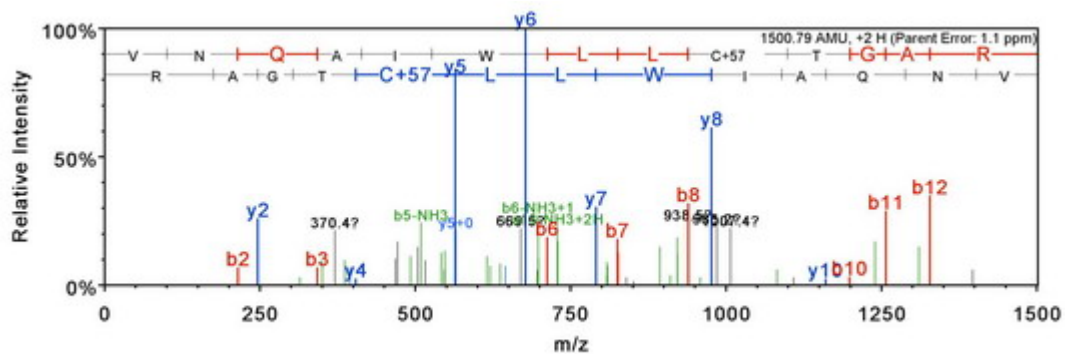

| B  | B Ions | B+2H  | B-NH3  | B-H2O  | A,A  | Y Ions | Y+2H  | Y-NH3  | Y-H2O  | Y  |
|----|--------|-------|--------|--------|------|--------|-------|--------|--------|----|
| 1  | 100.1  |       |        |        | V    | 1501.8 | 751.4 | 1484.8 | 1483.8 | 13 |
| 2  | 214.1  |       | 197.1  |        | N    | 1402.7 | 701.9 | 1385.7 | 1384.7 | 12 |
| 3  | 342.2  |       | 325.2  |        | Q    | 1288.7 | 644.9 | 1271.7 | 1270.7 | 11 |
| 4  | 413.2  |       | 396.2  |        | A    | 1160.6 | 580.8 | 1143.6 | 1142.6 | 10 |
| 5  | 526.3  |       | 509.3  |        | I    | 1089.6 | 545.3 | 1072.6 | 1071.6 | 9  |
| 6  | 712.4  | 356.7 | 695.4  |        | W    | 976.5  | 488.8 | 959.5  | 958.5  | 8  |
| 7  | 825.5  | 413.2 | 808.4  |        | L    | 790.4  | 395.7 | 773.4  | 772.4  | 7  |
| 8  | 938.6  | 469.8 | 921.5  |        | L    | 677.3  | 339.2 | 660.3  | 659.3  | 6  |
| 9  | 1098.6 | 549.8 | 1081.5 |        | C+57 | 564.3  |       | 547.2  | 546.3  | 5  |
| 10 | 1199.6 | 600.3 | 1182.6 | 1181.6 | T    | 404.2  |       | 387.2  | 386.2  | 4  |
| 11 | 1256.7 | 628.8 | 1239.6 | 1238.6 | G    | 303.2  |       | 286.2  |        | 3  |
| 12 | 1327.7 | 664.4 | 1310.7 | 1309.7 | A    | 246.2  |       | 229.1  |        | 2  |
| 13 | 1501.8 | 751.4 | 1484.8 | 1483.8 | R    | 175.1  |       | 158.1  |        | 1  |

Gene symbol: Rps9

Protein name: 40S ribosomal protein S9

Protein accession numbers: IPI00420726

Peptide sequence: (R)LFEGNALLR(R)

Exclusive (unique to this protein): TRUE

SEQUEST XCorr score: 2.12 SEQUEST DCn score: 0.445

Fix modifications: None

Variable modifications: None

charge: 2

Observed m/z: 516.7955

Actual minus calculated peptide mass (AMU): -0.0012249

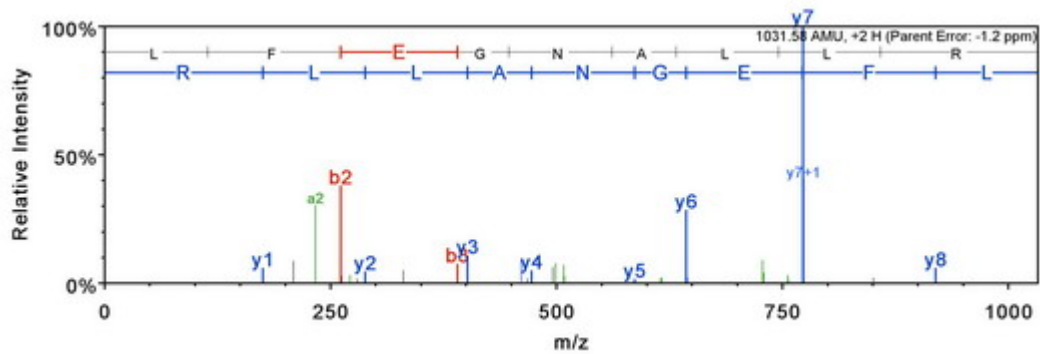

| B | B Ions | B+2H  | B-NH3  | B-H2O  | A,A | Y Ions | Y+2H  | Y-NH3  | Y-H2O  | Y |
|---|--------|-------|--------|--------|-----|--------|-------|--------|--------|---|
| 1 | 114.1  |       |        |        | L   | 1032.6 | 516.8 | 1015.6 | 1014.6 | 9 |
| 2 | 261.2  |       |        |        | F   | 919.5  | 460.3 | 902.5  | 901.5  | 8 |
| 3 | 390.2  |       |        | 372.2  | E   | 772.4  | 386.7 | 755.4  | 754.4  | 7 |
| 4 | 447.2  |       |        | 429.2  | G   | 643.4  | 322.2 | 626.4  |        | 6 |
| 5 | 561.3  |       | 544.2  | 543.3  | N   | 586.4  |       | 569.3  |        | 5 |
| 6 | 632.3  | 316.7 | 615.3  | 614.3  | A   | 472.3  |       | 455.3  |        | 4 |
| 7 | 745.4  | 373.2 | 728.4  | 727.4  | L   | 401.3  |       | 384.3  |        | 3 |
| 8 | 858.5  | 429.7 | 841.5  | 840.5  | L   | 288.2  |       | 271.2  |        | 2 |
| 9 | 1032.6 | 516.8 | 1015.6 | 1014.6 | R   | 175.1  |       | 158.1  |        | 1 |

Gene symbol: Sart3

Protein name: Isoform 1 of Squamous cell carcinoma antigen recognized by T-cells 3

Protein accession numbers: IPI00458854

Peptide sequence: (R)ALEYLQQEVEER(F)

Exclusive (unique to this protein): TRUE

SEQUEST XCorr score: 2.91 SEQUEST DCn score: 0.541

Fix modifications: None

Variable modifications: None

charge: 2

Observed m/z: 753.872

Actual minus calculated peptide mass (AMU): -0.007935

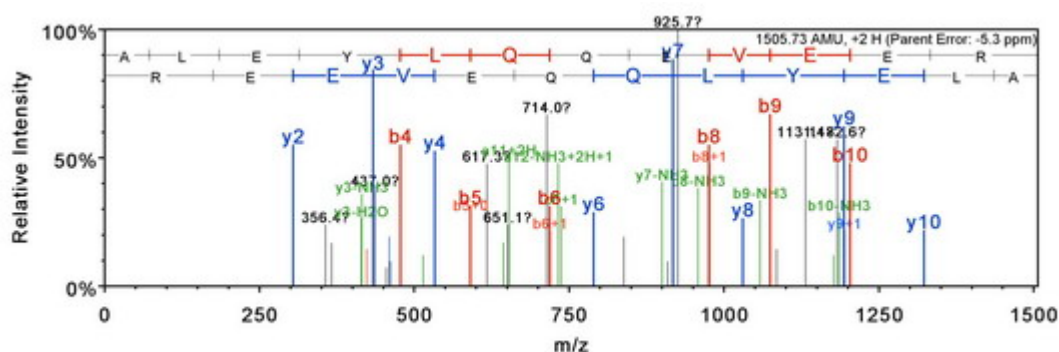

| B  | B ions | B+2H  | B-NH3  | B-H2O  | AA | Y ions | Y+2H  | Y-NH3  | Y-H2O  | Y  |
|----|--------|-------|--------|--------|----|--------|-------|--------|--------|----|
| 1  | 72.0   |       |        |        | A  | 1506.7 | 753.9 | 1489.7 | 1488.7 | 12 |
| 2  | 185.1  |       |        |        | L  | 1435.7 | 718.4 | 1418.7 | 1417.7 | 11 |
| 3  | 314.2  |       |        | 296.2  | E  | 1322.6 | 661.8 | 1305.6 | 1304.6 | 10 |
| 4  | 477.2  |       |        | 459.2  | Y  | 1193.6 | 597.3 | 1176.5 | 1175.6 | 9  |
| 5  | 590.3  |       |        | 572.3  | L  | 1030.5 | 515.8 | 1013.5 | 1012.5 | 8  |
| 6  | 718.4  | 359.7 | 701.4  | 700.4  | Q  | 917.4  | 459.2 | 900.4  | 899.4  | 7  |
| 7  | 846.4  | 423.7 | 829.4  | 828.4  | Q  | 789.4  | 395.2 | 772.4  | 771.4  | 6  |
| 8  | 975.5  | 488.2 | 958.5  | 957.5  | E  | 661.3  |       | 644.3  | 643.3  | 5  |
| 9  | 1074.5 | 537.8 | 1057.5 | 1056.5 | V  | 532.3  |       | 515.3  | 514.3  | 4  |
| 10 | 1203.6 | 602.3 | 1186.6 | 1185.6 | E  | 433.2  |       | 416.2  | 415.2  | 3  |
| 11 | 1332.6 | 666.8 | 1315.6 | 1314.6 | E  | 304.2  |       | 287.1  | 286.2  | 2  |
| 12 | 1506.7 | 753.9 | 1489.7 | 1488.7 | R  | 175.1  |       | 158.1  |        | 1  |

Gene symbol: Sdf2

Protein name: Stromal cell-derived factor 2 precursor

Protein accession numbers: IPI00123852

Peptide sequence: (R)YGSQSGQSVTVTSVDDNSYWR(I)

Exclusive (unique to this protein): TRUE

SEQUEST XCorr score: 2.56 SEQUEST DCn score: 0.811

Fix modifications: None

Variable modifications: None

charge: 2

Observed m/z: 1269.0599

Actual minus calculated peptide mass (AMU): -0.0056153



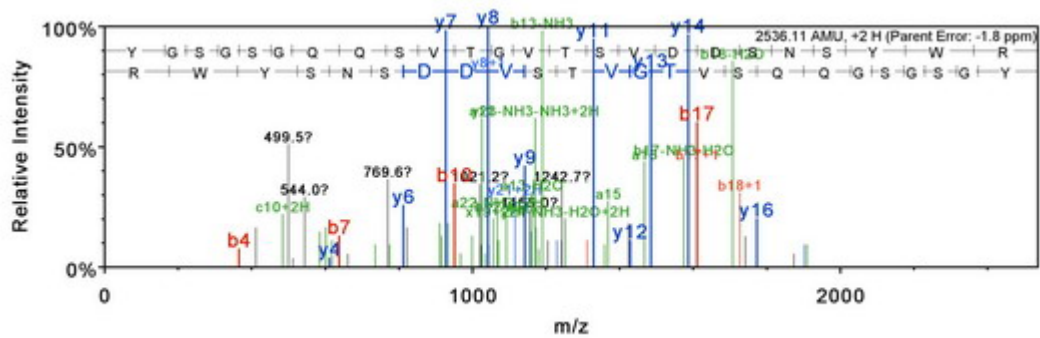

| B  | B ions | B+2H   | B-NH3  | B-H2O  | AA | Y ions | Y+2H   | Y-NH3  | Y-H2O  | Y  |
|----|--------|--------|--------|--------|----|--------|--------|--------|--------|----|
| 1  | 164.1  |        |        |        | Y  | 2537.1 | 1269.1 | 2520.1 | 2519.1 | 24 |
| 2  | 221.1  |        |        |        | G  | 2374.1 | 1187.5 | 2357.0 | 2356.0 | 23 |
| 3  | 308.1  |        |        | 290.1  | S  | 2317.0 | 1159.0 | 2300.0 | 2299.0 | 22 |
| 4  | 365.2  |        |        | 347.1  | G  | 2230.0 | 1115.5 | 2213.0 | 2212.0 | 21 |
| 5  | 452.2  |        |        | 434.2  | S  | 2173.0 | 1087.0 | 2155.9 | 2155.0 | 20 |
| 6  | 509.2  | 255.1  |        | 491.2  | G  | 2085.9 | 1043.5 | 2068.9 | 2067.9 | 19 |
| 7  | 637.3  | 319.1  | 620.2  | 619.3  | Q  | 2028.9 | 1015.0 | 2011.9 | 2010.9 | 18 |
| 8  | 765.3  | 383.2  | 748.3  | 747.3  | Q  | 1900.9 | 950.9  | 1883.8 | 1882.9 | 17 |
| 9  | 852.4  | 426.7  | 835.3  | 834.3  | S  | 1772.8 | 886.9  | 1755.8 | 1754.8 | 16 |
| 10 | 951.4  | 476.2  | 934.4  | 933.4  | V  | 1685.8 | 843.4  | 1668.8 | 1667.8 | 15 |
| 11 | 1052.5 | 526.7  | 1035.4 | 1034.5 | T  | 1586.7 | 793.9  | 1569.7 | 1568.7 | 14 |
| 12 | 1109.5 | 555.3  | 1092.5 | 1091.5 | G  | 1485.7 | 743.3  | 1468.6 | 1467.7 | 13 |
| 13 | 1208.5 | 604.8  | 1191.5 | 1190.5 | V  | 1428.6 | 714.8  | 1411.6 | 1410.6 | 12 |
| 14 | 1309.6 | 655.3  | 1292.6 | 1291.6 | T  | 1329.6 | 665.3  | 1312.5 | 1311.6 | 11 |
| 15 | 1396.6 | 698.8  | 1379.6 | 1378.6 | S  | 1228.5 | 614.8  | 1211.5 | 1210.5 | 10 |
| 16 | 1495.7 | 748.4  | 1478.7 | 1477.7 | V  | 1141.5 | 571.3  | 1124.5 | 1123.5 | 9  |
| 17 | 1610.7 | 805.9  | 1593.7 | 1592.7 | D  | 1042.4 | 521.7  | 1025.4 | 1024.4 | 8  |
| 18 | 1725.8 | 863.4  | 1708.7 | 1707.8 | D  | 927.4  | 464.2  | 910.4  | 909.4  | 7  |
| 19 | 1812.8 | 906.9  | 1795.8 | 1794.8 | S  | 812.4  | 406.7  | 795.3  | 794.4  | 6  |
| 20 | 1926.8 | 963.9  | 1909.8 | 1908.8 | N  | 725.3  |        | 708.3  | 707.3  | 5  |
| 21 | 2013.9 | 1007.4 | 1996.8 | 1995.9 | S  | 611.3  |        | 594.3  | 593.3  | 4  |
| 22 | 2176.9 | 1089.0 | 2159.9 | 2158.9 | Y  | 524.3  |        | 507.2  |        | 3  |
| 23 | 2363.0 | 1182.0 | 2346.0 | 2345.0 | W  | 361.2  |        | 344.2  |        | 2  |
| 24 | 2537.1 | 1269.1 | 2520.1 | 2519.1 | R  | 175.1  |        | 158.1  |        | 1  |

Gene symbol: Sdf211

Protein name: Stromal cell-derived factor 2-like protein 1 precursor

Protein accession numbers: IPI00227657

Peptide sequence: (K)YIGSGSGQSQSVTVGVTVSYVDLSDVSTVIGLIVSQQIGSGY

Exclusive (unique to this protein): TRUE

SEQUEST XCorr score: 2.16 SEQUEST DCn score: 0.692

Fix modifications: None

Variable modifications: None

charge: 2

Observed m/z: 1290.0579

Actual minus calculated peptide mass (AMU): 0.01587

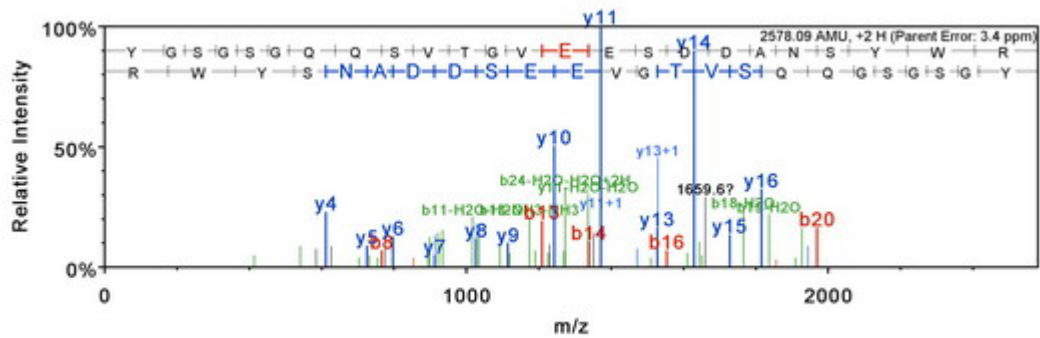

| B  | B ions | B+2H   | B-NH3  | B-H2O  | AA | Y ions | Y+2H   | Y-NH3  | Y-H2O  | Y  |
|----|--------|--------|--------|--------|----|--------|--------|--------|--------|----|
| 1  | 164.1  |        |        |        | Y  | 2579.1 | 1290.0 | 2562.1 | 2561.1 | 24 |
| 2  | 221.1  |        |        |        | G  | 2416.0 | 1208.5 | 2399.0 | 2398.0 | 23 |
| 3  | 308.1  |        |        | 290.1  | S  | 2359.0 | 1180.0 | 2342.0 | 2341.0 | 22 |
| 4  | 365.2  |        |        | 347.1  | G  | 2272.0 | 1136.5 | 2255.0 | 2254.0 | 21 |
| 5  | 452.2  |        |        | 434.2  | S  | 2215.0 | 1108.0 | 2197.9 | 2196.9 | 20 |
| 6  | 509.2  | 255.1  |        | 491.2  | G  | 2127.9 | 1064.5 | 2110.9 | 2109.9 | 19 |
| 7  | 637.3  | 319.1  | 620.2  | 619.3  | Q  | 2070.9 | 1036.0 | 2053.9 | 2052.9 | 18 |
| 8  | 765.3  | 383.2  | 748.3  | 747.3  | Q  | 1942.8 | 971.9  | 1925.8 | 1924.8 | 17 |
| 9  | 852.4  | 426.7  | 835.3  | 834.3  | S  | 1814.8 | 907.9  | 1797.8 | 1796.8 | 16 |
| 10 | 951.4  | 476.2  | 934.4  | 933.4  | V  | 1727.8 | 864.4  | 1710.7 | 1709.7 | 15 |
| 11 | 1052.5 | 526.7  | 1035.4 | 1034.5 | T  | 1628.7 | 814.9  | 1611.7 | 1610.7 | 14 |
| 12 | 1109.5 | 555.3  | 1092.5 | 1091.5 | G  | 1527.6 | 764.3  | 1510.6 | 1509.6 | 13 |
| 13 | 1208.5 | 604.8  | 1191.5 | 1190.5 | V  | 1470.6 | 735.8  | 1453.6 | 1452.6 | 12 |
| 14 | 1337.6 | 669.3  | 1320.6 | 1319.6 | E  | 1371.5 | 686.3  | 1354.5 | 1353.5 | 11 |
| 15 | 1466.6 | 733.8  | 1449.6 | 1448.6 | E  | 1242.5 | 621.8  | 1225.5 | 1224.5 | 10 |
| 16 | 1553.7 | 777.3  | 1536.7 | 1535.7 | S  | 1113.5 | 557.2  | 1096.4 | 1095.5 | 9  |
| 17 | 1668.7 | 834.9  | 1651.7 | 1650.7 | D  | 1026.4 | 513.7  | 1009.4 | 1008.4 | 8  |
| 18 | 1783.7 | 892.4  | 1766.7 | 1765.7 | D  | 911.4  | 456.2  | 894.4  | 893.4  | 7  |
| 19 | 1854.8 | 927.9  | 1837.7 | 1836.8 | A  | 796.4  | 398.7  | 779.4  | 778.4  | 6  |
| 20 | 1968.8 | 984.9  | 1951.8 | 1950.8 | N  | 725.3  |        | 708.3  | 707.3  | 5  |
| 21 | 2055.8 | 1028.4 | 2038.8 | 2037.8 | S  | 611.3  |        | 594.3  | 593.3  | 4  |
| 22 | 2218.9 | 1110.0 | 2201.9 | 2200.9 | Y  | 524.3  |        | 507.2  |        | 3  |
| 23 | 2405.0 | 1203.0 | 2388.0 | 2387.0 | W  | 361.2  |        | 344.2  |        | 2  |
| 24 | 2579.1 | 1290.0 | 2562.1 | 2561.1 | R  | 175.1  |        | 158.1  |        | 1  |

Gene symbol: Sec31a

Protein name: SEC31-like 1

Protein accession numbers: IPI00377592,IPI00850448

Peptide sequence: (R)TQACLCYICAGNVER(L)

Exclusive (unique to this protein): TRUE

SEQUEST XCorr score: 2.3 SEQUEST DCn score: 0.571

Fix modifications: C4: Carbamidomethyl (+57.02), C6: Carbamidomethyl (+57.02), C9:

Carbamidomethyl (+57.02)Variable modifications: None

charge: 2

Observed m/z: 907.9009

Actual minus calculated peptide mass (AMU): -0.004761

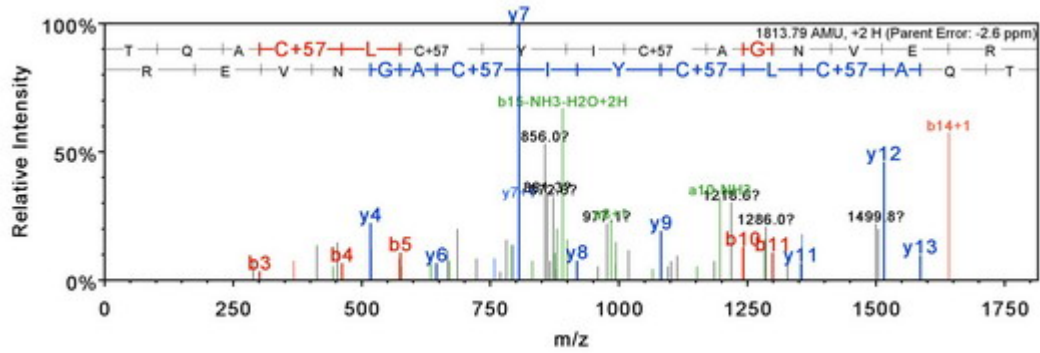

| B  | B Ions | B+2H  | B-NH3  | B-H2O  | AA   | Y Ions | Y+2H  | Y-NH3  | Y-H2O  | Y  |
|----|--------|-------|--------|--------|------|--------|-------|--------|--------|----|
| 1  | 102.1  |       |        | 84.0   | T    | 1814.8 | 907.9 | 1797.8 | 1796.8 | 15 |
| 2  | 230.1  |       | 213.1  | 212.1  | Q    | 1713.8 | 857.4 | 1696.7 | 1695.7 | 14 |
| 3  | 301.2  |       | 284.1  | 283.1  | A    | 1585.7 | 793.4 | 1568.7 | 1567.7 | 13 |
| 4  | 461.2  |       | 444.2  | 443.2  | C+57 | 1514.7 | 757.8 | 1497.6 | 1496.6 | 12 |
| 5  | 574.3  |       | 557.2  | 556.3  | L    | 1354.6 | 677.8 | 1337.6 | 1336.6 | 11 |
| 6  | 734.3  | 367.7 | 717.3  | 716.3  | C+57 | 1241.5 | 621.3 | 1224.5 | 1223.5 | 10 |
| 7  | 897.4  | 449.2 | 880.3  | 879.4  | Y    | 1081.5 | 541.3 | 1064.5 | 1063.5 | 9  |
| 8  | 1010.4 | 505.7 | 993.4  | 992.4  | I    | 918.5  | 459.7 | 901.4  | 900.4  | 8  |
| 9  | 1170.5 | 585.7 | 1153.5 | 1152.5 | C+57 | 805.4  | 403.2 | 788.3  | 787.4  | 7  |
| 10 | 1241.5 | 621.3 | 1224.5 | 1223.5 | A    | 645.3  | 323.2 | 628.3  | 627.3  | 6  |
| 11 | 1298.5 | 649.8 | 1281.5 | 1280.5 | G    | 574.3  |       | 557.3  | 556.3  | 5  |
| 12 | 1412.6 | 706.8 | 1395.5 | 1394.6 | N    | 517.3  |       | 500.3  | 499.3  | 4  |
| 13 | 1511.6 | 756.3 | 1494.6 | 1493.6 | V    | 403.2  |       | 386.2  | 385.2  | 3  |
| 14 | 1640.7 | 820.9 | 1623.7 | 1622.7 | E    | 304.2  |       | 287.1  | 286.2  | 2  |
| 15 | 1814.8 | 907.9 | 1797.8 | 1796.8 | R    | 175.1  |       | 158.1  |        | 1  |

Gene symbol: Sel11

Protein name: Isoform 1 of Sel-1 homolog precursor

Protein accession numbers: IPI00131143,IPI00224252

Peptide sequence: (R)LVANHVASDISLTGGSVVQR(I)

Exclusive (unique to this protein): TRUE

SEQUEST XCorr score: 2.14 SEQUEST DCn score: 0.545

Fix modifications: None

Variable modifications: None

charge: 2

Observed m/z: 1012.0497

Actual minus calculated peptide mass (AMU): -0.0019551

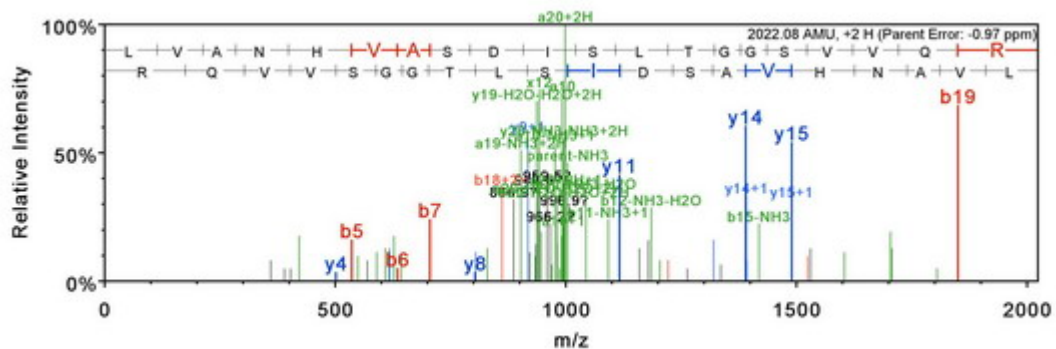

| B  | B Ions | B+2H   | B-NH3  | B-H2O  | AA | Y Ions | Y+2H   | Y-NH3  | Y-H2O  | Y  |
|----|--------|--------|--------|--------|----|--------|--------|--------|--------|----|
| 1  | 114.1  |        |        |        | L  | 2023.1 | 1012.1 | 2006.1 | 2005.1 | 20 |
| 2  | 213.2  |        |        |        | V  | 1910.0 | 955.5  | 1893.0 | 1892.0 | 19 |
| 3  | 284.2  |        |        |        | A  | 1810.9 | 906.0  | 1793.9 | 1792.9 | 18 |
| 4  | 398.2  |        | 381.2  |        | N  | 1739.9 | 870.5  | 1722.9 | 1721.9 | 17 |
| 5  | 535.3  | 268.1  | 518.3  |        | H  | 1625.9 | 813.4  | 1608.8 | 1607.9 | 16 |
| 6  | 634.4  | 317.7  | 617.3  |        | V  | 1488.8 | 744.9  | 1471.8 | 1470.8 | 15 |
| 7  | 705.4  | 353.2  | 688.4  |        | A  | 1389.7 | 695.4  | 1372.7 | 1371.7 | 14 |
| 8  | 792.4  | 396.7  | 775.4  | 774.4  | S  | 1318.7 | 659.9  | 1301.7 | 1300.7 | 13 |
| 9  | 907.5  | 454.2  | 890.4  | 889.5  | D  | 1231.7 | 616.3  | 1214.6 | 1213.7 | 12 |
| 10 | 1020.6 | 510.8  | 1003.5 | 1002.5 | I  | 1116.6 | 558.8  | 1099.6 | 1098.6 | 11 |
| 11 | 1107.6 | 554.3  | 1090.5 | 1089.6 | S  | 1003.6 | 502.3  | 986.5  | 985.5  | 10 |
| 12 | 1220.7 | 610.8  | 1203.6 | 1202.7 | L  | 916.5  | 458.8  | 899.5  | 898.5  | 9  |
| 13 | 1321.7 | 661.4  | 1304.7 | 1303.7 | T  | 803.4  | 402.2  | 786.4  | 785.4  | 8  |
| 14 | 1378.7 | 689.9  | 1361.7 | 1360.7 | G  | 702.4  | 351.7  | 685.4  | 684.4  | 7  |
| 15 | 1435.8 | 718.4  | 1418.7 | 1417.7 | G  | 645.4  | 323.2  | 628.3  | 627.4  | 6  |
| 16 | 1522.8 | 761.9  | 1505.8 | 1504.8 | S  | 588.4  |        | 571.3  | 570.3  | 5  |
| 17 | 1621.9 | 811.4  | 1604.8 | 1603.8 | V  | 501.3  |        | 484.3  |        | 4  |
| 18 | 1720.9 | 861.0  | 1703.9 | 1702.9 | V  | 402.3  |        | 385.2  |        | 3  |
| 19 | 1849.0 | 925.0  | 1832.0 | 1831.0 | Q  | 303.2  |        | 286.2  |        | 2  |
| 20 | 2023.1 | 1012.1 | 2006.1 | 2005.1 | R  | 175.1  |        | 158.1  |        | 1  |

Gene symbol: Sept2

Protein name: Septin-2

Protein accession numbers: IPI00114945

Peptide sequence: (R)LTVVDTPGYGDAINCR(D)

Exclusive (unique to this protein): TRUE

SEQUEST XCorr score: 2 SEQUEST DCn score: 0.564

Fix modifications: C15: Carbamidomethyl (+57.02) Variable modifications: None

charge: 2

Observed m/z: 875.9213

Actual minus calculated peptide mass (AMU): -0.008667

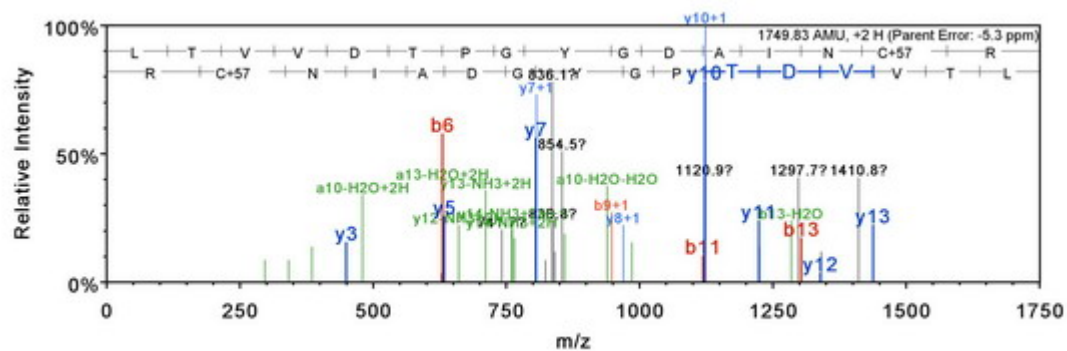

| B  | B Ions | B+2H  | B-NH3  | B-H2O  | AA   | Y Ions | Y+2H  | Y-NH3  | Y-H2O  | Y  |
|----|--------|-------|--------|--------|------|--------|-------|--------|--------|----|
| 1  | 114.1  |       |        |        | L    | 1750.8 | 875.9 | 1733.8 | 1732.8 | 16 |
| 2  | 215.1  |       |        | 197.1  | T    | 1637.8 | 819.4 | 1620.7 | 1619.8 | 15 |
| 3  | 314.2  |       |        | 296.2  | V    | 1536.7 | 768.9 | 1519.7 | 1518.7 | 14 |
| 4  | 413.3  |       |        | 395.3  | V    | 1437.6 | 719.3 | 1420.6 | 1419.6 | 13 |
| 5  | 528.3  |       |        | 510.3  | D    | 1338.6 | 669.8 | 1321.5 | 1320.6 | 12 |
| 6  | 629.4  | 315.2 |        | 611.3  | T    | 1223.5 | 612.3 | 1206.5 | 1205.5 | 11 |
| 7  | 726.4  | 363.7 |        | 708.4  | P    | 1122.5 | 561.8 | 1105.5 | 1104.5 | 10 |
| 8  | 783.4  | 392.2 |        | 765.4  | G    | 1025.5 | 513.2 | 1008.4 | 1007.4 | 9  |
| 9  | 946.5  | 473.8 |        | 928.5  | Y    | 968.4  | 484.7 | 951.4  | 950.4  | 8  |
| 10 | 1003.5 | 502.3 |        | 985.5  | G    | 805.4  | 403.2 | 788.3  | 787.4  | 7  |
| 11 | 1118.5 | 559.8 |        | 1100.5 | D    | 748.3  | 374.7 | 731.3  | 730.3  | 6  |
| 12 | 1189.6 | 595.3 |        | 1171.6 | A    | 633.3  |       | 616.3  |        | 5  |
| 13 | 1302.7 | 651.8 |        | 1284.7 | I    | 562.3  |       | 545.3  |        | 4  |
| 14 | 1416.7 | 708.9 | 1399.7 | 1398.7 | N    | 449.2  |       | 432.2  |        | 3  |
| 15 | 1576.7 | 788.9 | 1559.7 | 1558.7 | C+57 | 335.2  |       | 318.1  |        | 2  |
| 16 | 1750.8 | 875.9 | 1733.8 | 1732.8 | R    | 175.1  |       | 158.1  |        | 1  |

Gene symbol: Sfrs3

Protein name: Isoform Long of Splicing factor, arginine/serine-rich 3

Protein accession numbers:

IPI00129323,IPI00221826,IPI00346575,IPI00474970,IPI00756474,IPI00850997

Peptide sequence: (R)AFGYGPLR(S)

Exclusive (unique to this protein): TRUE

SEQUEST XCorr score: 2.05 SEQUEST DCn score: 0.368

Fix modifications: None

Variable modifications: None

charge: 2 Observed m/z: 522.2685

Actual minus calculated peptide mass (AMU): -0.002319

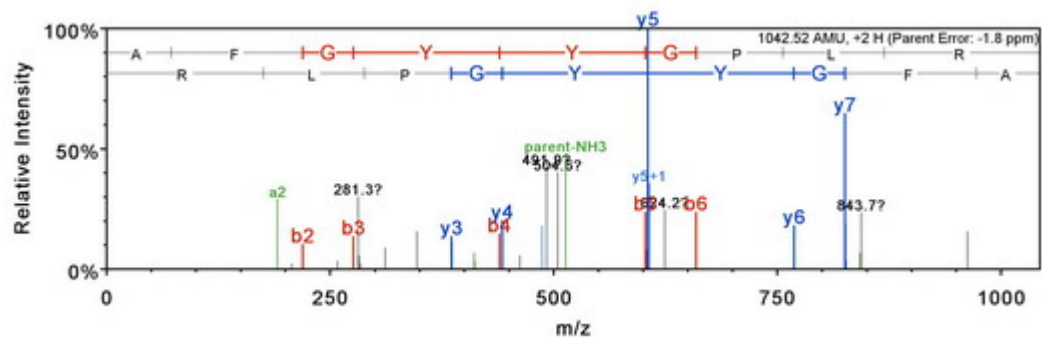

| B | B Ions | B+2H  | B-NH3  | B-H2O | AA | Y Ions | Y+2H  | Y-NH3  | Y-H2O | Y |
|---|--------|-------|--------|-------|----|--------|-------|--------|-------|---|
| 1 | 72.0   |       |        |       | A  | 1043.5 | 522.3 | 1026.5 |       | 9 |
| 2 | 219.1  |       |        |       | F  | 972.5  | 486.8 | 955.5  |       | 8 |
| 3 | 276.1  |       |        |       | G  | 825.4  | 413.2 | 808.4  |       | 7 |
| 4 | 439.2  |       |        |       | Y  | 768.4  | 384.7 | 751.4  |       | 6 |
| 5 | 602.3  |       |        |       | Y  | 605.3  |       | 588.3  |       | 5 |
| 6 | 659.3  | 330.2 |        |       | G  | 442.3  |       | 425.3  |       | 4 |
| 7 | 756.3  | 378.7 |        |       | P  | 385.3  |       | 368.2  |       | 3 |
| 8 | 869.4  | 435.2 |        |       | L  | 288.2  |       | 271.2  |       | 2 |
| 9 | 1043.5 | 522.3 | 1026.5 |       | R  | 175.1  |       | 158.1  |       | 1 |

Gene symbol: Sgms2

Protein name: Phosphatidylcholine:ceramide cholinephosphotransferase 2

Protein accession numbers: IPI00187570

Peptide sequence: (K)LNGDSQAKIQR(I)

Exclusive (unique to this protein): TRUE

SEQUEST XCorr score: 2.08 SEQUEST DCn score: 0.355

Fix modifications: None

Variable modifications: None

charge: 2

Observed m/z: 615.3288

Actual minus calculated peptide mass (AMU): -0.01062

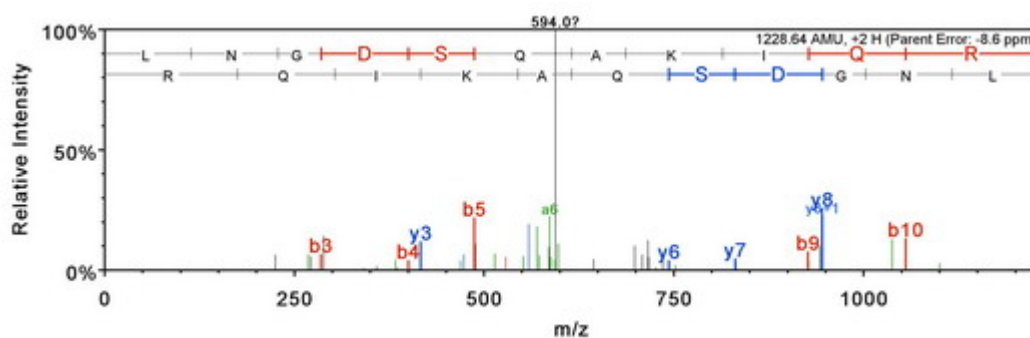

| B  | B ions | B+2H  | B-NH3  | B-H2O  | AA | Y ions | Y+2H  | Y-NH3  | Y-H2O  | Y  |
|----|--------|-------|--------|--------|----|--------|-------|--------|--------|----|
| 1  | 114.1  |       |        |        | L  | 1229.7 | 615.3 | 1212.6 | 1211.7 | 11 |
| 2  | 228.1  |       | 211.1  |        | N  | 1116.6 | 558.8 | 1099.5 | 1098.6 | 10 |
| 3  | 285.2  |       | 268.1  |        | G  | 1002.5 | 501.8 | 985.5  | 984.5  | 9  |
| 4  | 400.2  |       | 383.2  | 382.2  | D  | 945.5  | 473.3 | 928.5  | 927.5  | 8  |
| 5  | 487.2  |       | 470.2  | 469.2  | S  | 830.5  | 415.8 | 813.5  | 812.5  | 7  |
| 6  | 615.3  | 308.1 | 598.3  | 597.3  | Q  | 743.5  | 372.2 | 726.4  |        | 6  |
| 7  | 686.3  | 343.7 | 669.3  | 668.3  | A  | 615.4  | 308.2 | 598.4  |        | 5  |
| 8  | 814.4  | 407.7 | 797.4  | 796.4  | K  | 544.4  | 272.7 | 527.3  |        | 4  |
| 9  | 927.5  | 464.3 | 910.5  | 909.5  | I  | 416.3  |       | 399.2  |        | 3  |
| 10 | 1055.5 | 528.3 | 1038.5 | 1037.5 | Q  | 303.2  |       | 286.2  |        | 2  |
| 11 | 1229.7 | 615.3 | 1212.6 | 1211.7 | R  | 175.1  |       | 158.1  |        | 1  |

Gene symbol: Ski

Protein name: Sloan-Kettering viral oncogene homolog

Protein accession numbers: IPI00462772,IPI00622896

Peptide sequence: (R)SLHQELEFLR(V)

Exclusive (unique to this protein): TRUE

SEQUEST XCorr score: 2.05 SEQUEST DCn score: 0.594

Fix modifications: None

Variable modifications: None

charge: 2

Observed m/z: 636.3404

Actual minus calculated peptide mass (AMU): -0.001831

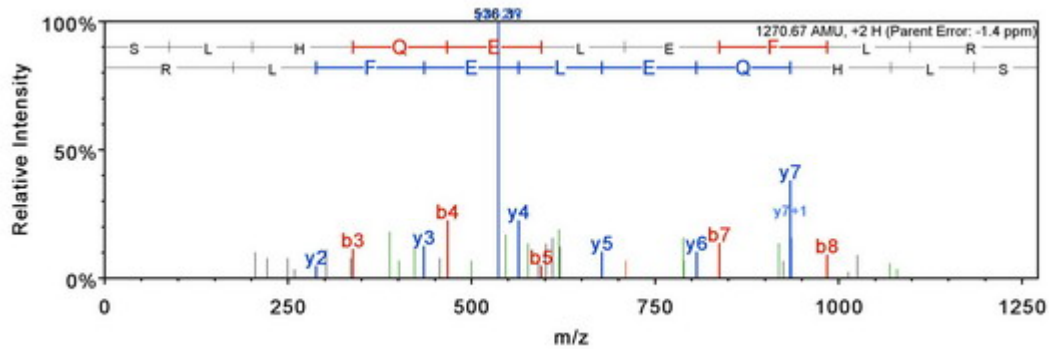

| B  | B Ions | B+2H  | B-NH3  | B-H2O  | A,A | Y Ions | Y+2H  | Y-NH3  | Y-H2O  | Y  |
|----|--------|-------|--------|--------|-----|--------|-------|--------|--------|----|
| 1  | 88.0   |       |        | 70.0   | S   | 1271.7 | 636.3 | 1254.7 | 1253.7 | 10 |
| 2  | 201.1  |       |        | 183.1  | L   | 1184.6 | 592.8 | 1167.6 | 1166.6 | 9  |
| 3  | 338.2  | 169.6 |        | 320.2  | H   | 1071.6 | 536.3 | 1054.5 | 1053.5 | 8  |
| 4  | 466.2  | 233.6 | 449.2  | 448.2  | Q   | 934.5  | 467.8 | 917.5  | 916.5  | 7  |
| 5  | 595.3  | 298.2 | 578.3  | 577.3  | E   | 806.4  | 403.7 | 789.4  | 788.4  | 6  |
| 6  | 708.4  | 354.7 | 691.3  | 690.4  | L   | 677.4  |       | 660.4  | 659.4  | 5  |
| 7  | 837.4  | 419.2 | 820.4  | 819.4  | E   | 564.3  |       | 547.3  | 546.3  | 4  |
| 8  | 984.5  | 492.7 | 967.5  | 966.5  | F   | 435.3  |       | 418.3  |        | 3  |
| 9  | 1097.6 | 549.3 | 1080.5 | 1079.5 | L   | 288.2  |       | 271.2  |        | 2  |
| 10 | 1271.7 | 636.3 | 1254.7 | 1253.7 | R   | 175.1  |       | 158.1  |        | 1  |

Gene symbol: Slc25a1

Protein name: NOD-derived CD11c +ve dendritic cells cDNA, RIKEN full-length enriched library, clone:F630026H16 product:solute carrier family 25 (mitochondrial carrier; citrate transporter), member 1, full insert sequence

Protein accession numbers: IPI00276926

Peptide sequence: (R)GLSSLLYGSIPK(A)

Exclusive (unique to this protein): TRUE

SEQUEST XCorr score: 2.37 SEQUEST DCn score: 0.549

Fix modifications: None

Variable modifications: None

charge: 2

Observed m/z: 617.8525

Actual minus calculated peptide mass (AMU): -0.007568

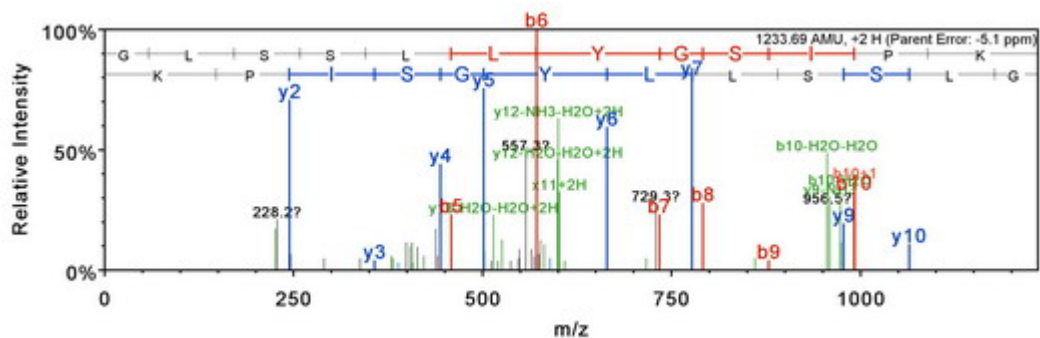

| B  | B Ions | B+2H  | B-NH3  | B-H2O  | AA | Y Ions | Y+2H  | Y-NH3  | Y-H2O  | Y  |
|----|--------|-------|--------|--------|----|--------|-------|--------|--------|----|
| 1  | 58.0   |       |        |        | G  | 1234.7 | 617.9 | 1217.7 | 1216.7 | 12 |
| 2  | 171.1  |       |        |        | L  | 1177.7 | 589.4 | 1160.7 | 1159.7 | 11 |
| 3  | 258.1  |       |        | 240.1  | S  | 1064.6 | 532.8 | 1047.6 | 1046.6 | 10 |
| 4  | 345.2  |       |        | 327.2  | S  | 977.6  | 489.3 | 960.5  | 959.6  | 9  |
| 5  | 458.3  |       |        | 440.3  | L  | 890.5  | 445.8 | 873.5  | 872.5  | 8  |
| 6  | 571.4  | 286.2 |        | 553.3  | L  | 777.5  | 389.2 | 760.4  | 759.4  | 7  |
| 7  | 734.4  | 367.7 |        | 716.4  | Y  | 664.4  | 332.7 | 647.3  | 646.4  | 6  |
| 8  | 791.4  | 396.2 |        | 773.4  | G  | 501.3  |       | 484.3  | 483.3  | 5  |
| 9  | 878.5  | 439.7 |        | 860.5  | S  | 444.3  |       | 427.3  | 426.3  | 4  |
| 10 | 991.6  | 496.3 |        | 973.5  | I  | 357.3  |       | 340.2  |        | 3  |
| 11 | 1088.6 | 544.8 |        | 1070.6 | P  | 244.2  |       | 227.1  |        | 2  |
| 12 | 1234.7 | 617.9 | 1217.7 | 1216.7 | K  | 147.1  |       | 130.1  |        | 1  |

Gene symbol: Slc25a22

Protein name: Mitochondrial glutamate carrier 1

Protein accession numbers: IPI00109275,IPI00756073

Peptide sequence: (R)GVNEDTYSGFLDCAR(K)

Exclusive (unique to this protein): TRUE

SEQUEST XCorr score: 2.53 SEQUEST DCn score: 0.65

Fix modifications: C13: Carbamidomethyl (+57.02)Variable modifications: None

charge: 2

Observed m/z: 852.3712

Actual minus calculated peptide mass (AMU): 0.0009766

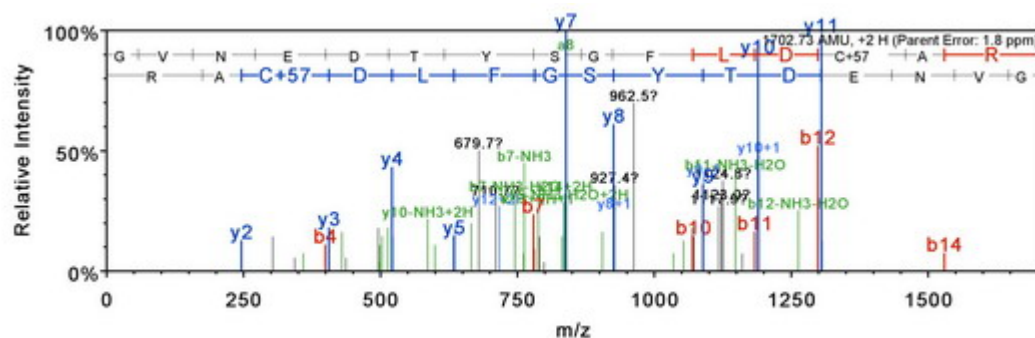

| B  | B Ions | B+2H  | B-NH3  | B-H2O  | AA   | Y Ions | Y+2H  | Y-NH3  | Y-H2O  | Y  |
|----|--------|-------|--------|--------|------|--------|-------|--------|--------|----|
| 1  | 58.0   |       |        |        | G    | 1703.7 | 852.4 | 1686.7 | 1685.7 | 15 |
| 2  | 157.1  |       |        |        | V    | 1646.7 | 823.9 | 1629.7 | 1628.7 | 14 |
| 3  | 271.1  |       | 254.1  |        | N    | 1547.6 | 774.3 | 1530.6 | 1529.6 | 13 |
| 4  | 400.2  |       | 383.2  | 382.2  | E    | 1433.6 | 717.3 | 1416.6 | 1415.6 | 12 |
| 5  | 515.2  |       | 498.2  | 497.2  | D    | 1304.6 | 652.8 | 1287.5 | 1286.5 | 11 |
| 6  | 616.3  | 308.6 | 599.2  | 598.3  | T    | 1189.5 | 595.3 | 1172.5 | 1171.5 | 10 |
| 7  | 779.3  | 390.2 | 762.3  | 761.3  | Y    | 1088.5 | 544.8 | 1071.5 | 1070.5 | 9  |
| 8  | 866.4  | 433.7 | 849.3  | 848.3  | S    | 925.4  | 463.2 | 908.4  | 907.4  | 8  |
| 9  | 923.4  | 462.2 | 906.4  | 905.4  | G    | 838.4  | 419.7 | 821.4  | 820.4  | 7  |
| 10 | 1070.4 | 535.7 | 1053.4 | 1052.4 | F    | 781.4  | 391.2 | 764.3  | 763.4  | 6  |
| 11 | 1183.5 | 592.3 | 1166.5 | 1165.5 | L    | 634.3  |       | 617.3  | 616.3  | 5  |
| 12 | 1298.5 | 649.8 | 1281.5 | 1280.5 | D    | 521.2  |       | 504.2  | 503.2  | 4  |
| 13 | 1458.6 | 729.8 | 1441.6 | 1440.6 | C+57 | 406.2  |       | 389.2  |        | 3  |
| 14 | 1529.6 | 765.3 | 1512.6 | 1511.6 | A    | 246.2  |       | 229.1  |        | 2  |
| 15 | 1703.7 | 852.4 | 1686.7 | 1685.7 | R    | 175.1  |       | 158.1  |        | 1  |



Gene symbol: Slc25a35

Protein name: Solute carrier family 25 member 35

Protein accession numbers: IPI00111884,IPI00648190

Peptide sequence: (R)MQLQGELQAPGTYQR(H)

Exclusive (unique to this protein): TRUE

SEQUEST XCorr score: 2.23 SEQUEST DCn score: 0.534

Fix modifications: None

Variable modifications: None

charge: 2

Observed m/z: 860.4302

Actual minus calculated peptide mass (AMU): 0.003418

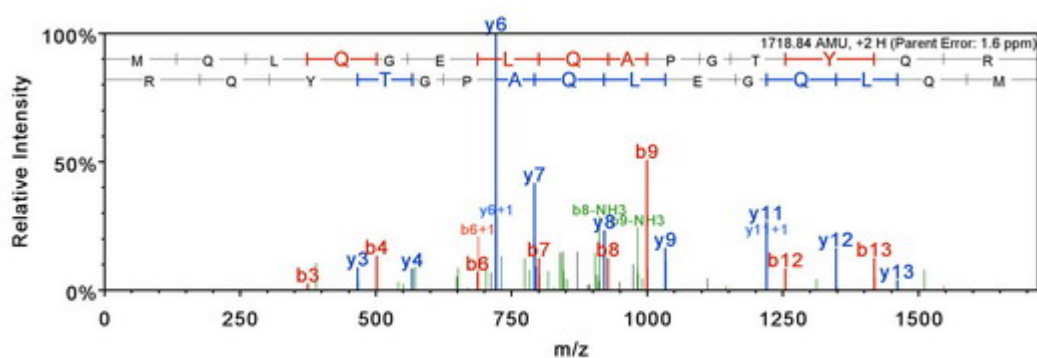

| B  | B ions | B+2H  | B-NH3  | B-H2O  | AA | Y ions | Y+2H  | Y-NH3  | Y-H2O  | Y  |
|----|--------|-------|--------|--------|----|--------|-------|--------|--------|----|
| 1  | 132.1  |       |        |        | M  | 1719.9 | 860.4 | 1702.8 | 1701.8 | 15 |
| 2  | 260.1  |       | 243.1  |        | Q  | 1588.8 | 794.9 | 1571.8 | 1570.8 | 14 |
| 3  | 373.2  |       | 356.2  |        | L  | 1460.8 | 730.9 | 1443.7 | 1442.7 | 13 |
| 4  | 501.3  |       | 484.2  |        | Q  | 1347.7 | 674.3 | 1330.6 | 1329.7 | 12 |
| 5  | 558.3  |       | 541.2  |        | G  | 1219.6 | 610.3 | 1202.6 | 1201.6 | 11 |
| 6  | 687.3  | 344.2 | 670.3  | 669.3  | E  | 1162.6 | 581.8 | 1145.6 | 1144.6 | 10 |
| 7  | 800.4  | 400.7 | 783.4  | 782.4  | L  | 1033.5 | 517.3 | 1016.5 | 1015.5 | 9  |
| 8  | 928.5  | 464.7 | 911.4  | 910.5  | Q  | 920.5  | 460.7 | 903.4  | 902.5  | 8  |
| 9  | 999.5  | 500.3 | 982.5  | 981.5  | A  | 792.4  | 396.7 | 775.4  | 774.4  | 7  |
| 10 | 1096.5 | 548.8 | 1079.5 | 1078.5 | P  | 721.4  | 361.2 | 704.3  | 703.4  | 6  |
| 11 | 1153.6 | 577.3 | 1136.5 | 1135.6 | G  | 624.3  |       | 607.3  | 606.3  | 5  |
| 12 | 1254.6 | 627.8 | 1237.6 | 1236.6 | T  | 567.3  |       | 550.3  | 549.3  | 4  |
| 13 | 1417.7 | 709.3 | 1400.7 | 1399.7 | Y  | 466.2  |       | 449.2  |        | 3  |
| 14 | 1545.7 | 773.4 | 1528.7 | 1527.7 | Q  | 303.2  |       | 286.2  |        | 2  |
| 15 | 1719.9 | 860.4 | 1702.8 | 1701.8 | R  | 175.1  |       | 158.1  |        | 1  |

Gene symbol: Slc25a4

Protein name: ADP/ATP translocase 1

Protein accession numbers: IPI00115564,IPI00676622

Peptide sequence: (R)AAYFGVYDTAK(G)

Exclusive (unique to this protein): TRUE

SEQUEST XCorr score: 2.18 SEQUEST DCn score: 0.627

Fix modifications: None

Variable modifications: None

charge: 2

Observed m/z: 603.2962

Actual minus calculated peptide mass (AMU): 0.0002441

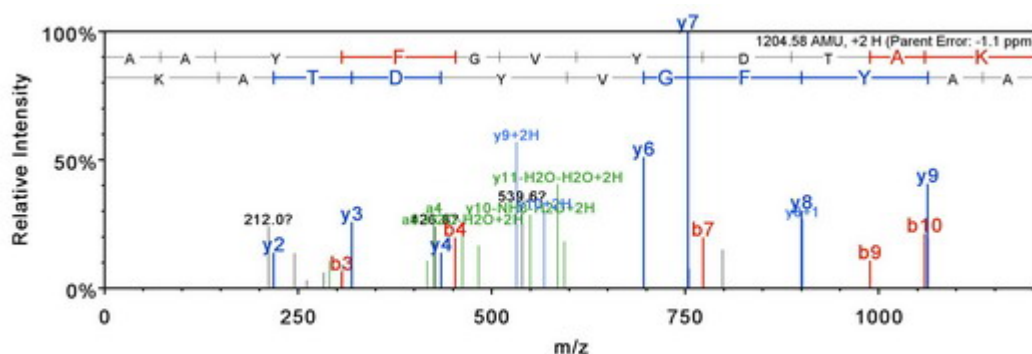

| B  | B ions | B+2H  | B-NH3  | B-H2O  | A,A | Y ions | Y+2H  | Y-NH3  | Y-H2O  | Y  |
|----|--------|-------|--------|--------|-----|--------|-------|--------|--------|----|
| 1  | 72.0   |       |        |        | A   | 1205.6 | 603.3 | 1188.6 | 1187.6 | 11 |
| 2  | 143.1  |       |        |        | A   | 1134.5 | 567.8 | 1117.5 | 1116.5 | 10 |
| 3  | 306.2  |       |        |        | Y   | 1063.5 | 532.3 | 1046.5 | 1045.5 | 9  |
| 4  | 453.2  |       |        |        | F   | 900.5  | 450.7 | 883.4  | 882.4  | 8  |
| 5  | 510.2  |       |        |        | G   | 753.4  | 377.2 | 736.4  | 735.4  | 7  |
| 6  | 609.3  | 305.2 |        |        | V   | 696.4  | 348.7 | 679.3  | 678.4  | 6  |
| 7  | 772.4  | 386.7 |        |        | Y   | 597.3  |       | 580.3  | 579.3  | 5  |
| 8  | 887.4  | 444.2 |        | 869.4  | D   | 434.2  |       | 417.2  | 416.2  | 4  |
| 9  | 988.4  | 494.7 |        | 970.4  | T   | 319.2  |       | 302.2  | 301.2  | 3  |
| 10 | 1059.5 | 530.2 |        | 1041.5 | A   | 218.2  |       | 201.1  |        | 2  |
| 11 | 1205.6 | 603.3 | 1188.6 | 1187.6 | K   | 147.1  |       | 130.1  |        | 1  |

Gene symbol: Snrpd1

Protein name: Small nuclear ribonucleoprotein Sm D1

Protein accession numbers: IPI00322749

Peptide sequence: (K)NREPVQLETLSIR(G)

Exclusive (unique to this protein): TRUE

SEQUEST XCorr score: 2.29 SEQUEST DCn score: 0.416

Fix modifications: None

Variable modifications: None

charge: 2

Observed m/z: 777.9357

Actual minus calculated peptide mass (AMU): 0.003052

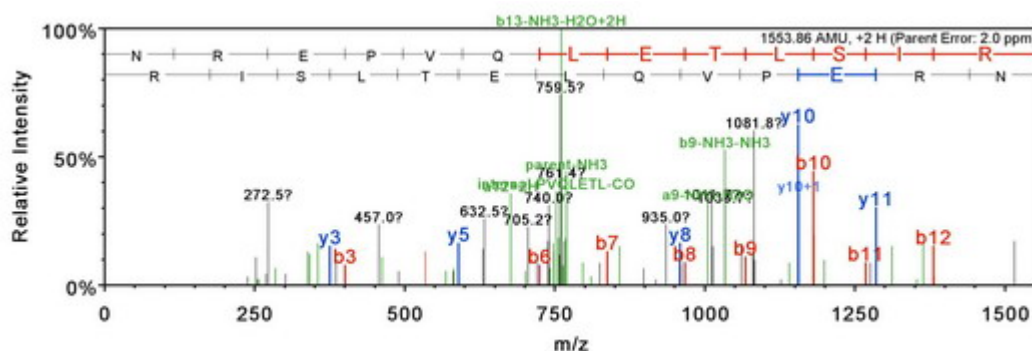

| B  | B Ions | B+2H  | B-NH3  | B-H2O  | AA | Y Ions | Y+2H  | Y-NH3  | Y-H2O  | Y  |
|----|--------|-------|--------|--------|----|--------|-------|--------|--------|----|
| 1  | 115.1  |       | 98.0   |        | N  | 1554.9 | 777.9 | 1537.8 | 1536.9 | 13 |
| 2  | 271.1  | 136.1 | 254.1  |        | R  | 1440.8 | 720.9 | 1423.8 | 1422.8 | 12 |
| 3  | 400.2  | 200.6 | 383.2  | 382.2  | E  | 1284.7 | 642.9 | 1267.7 | 1266.7 | 11 |
| 4  | 497.3  | 249.1 | 480.2  | 479.2  | P  | 1155.7 | 578.3 | 1138.7 | 1137.7 | 10 |
| 5  | 596.3  | 298.7 | 579.3  | 578.3  | V  | 1058.6 | 529.8 | 1041.6 | 1040.6 | 9  |
| 6  | 724.4  | 362.7 | 707.4  | 706.4  | Q  | 959.6  | 480.3 | 942.5  | 941.5  | 8  |
| 7  | 837.5  | 419.2 | 820.4  | 819.5  | L  | 831.5  | 416.3 | 814.5  | 813.5  | 7  |
| 8  | 966.5  | 483.8 | 949.5  | 948.5  | E  | 718.4  | 359.7 | 701.4  | 700.4  | 6  |
| 9  | 1067.5 | 534.3 | 1050.5 | 1049.5 | T  | 589.4  |       | 572.3  | 571.4  | 5  |
| 10 | 1180.6 | 590.8 | 1163.6 | 1162.6 | L  | 488.3  |       | 471.3  | 470.3  | 4  |
| 11 | 1267.7 | 634.3 | 1250.6 | 1249.7 | S  | 375.2  |       | 358.2  | 357.2  | 3  |
| 12 | 1380.8 | 690.9 | 1363.7 | 1362.7 | I  | 288.2  |       | 271.2  |        | 2  |
| 13 | 1554.9 | 777.9 | 1537.8 | 1536.9 | R  | 175.1  |       | 158.1  |        | 1  |

Gene symbol: Snrpd3

Protein name: Small nuclear ribonucleoprotein Sm D3

Protein accession numbers: IPI00119224

Peptide sequence: (R)VAQLEQVYIR(G)

Exclusive (unique to this protein): TRUE

SEQUEST XCorr score: 2.58 SEQUEST DCn score: 0.565

Fix modifications: None

Variable modifications: None

charge: 2 Observed m/z: 609.8461

Actual minus calculated peptide mass (AMU): -0.0003662

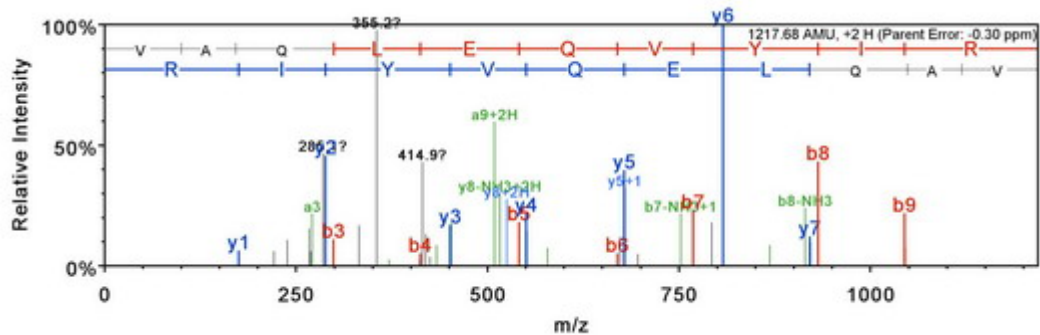

| B  | B Ions | B+2H  | B-NH3  | B-H2O  | AA | Y Ions | Y+2H  | Y-NH3  | Y-H2O  | Y  |
|----|--------|-------|--------|--------|----|--------|-------|--------|--------|----|
| 1  | 100.1  |       |        |        | V  | 1218.7 | 609.9 | 1201.7 | 1200.7 | 10 |
| 2  | 171.1  |       |        |        | A  | 1119.6 | 560.3 | 1102.6 | 1101.6 | 9  |
| 3  | 299.2  |       | 282.2  |        | Q  | 1048.6 | 524.8 | 1031.5 | 1030.6 | 8  |
| 4  | 412.3  |       | 395.2  |        | L  | 920.5  | 460.8 | 903.5  | 902.5  | 7  |
| 5  | 541.3  |       | 524.3  | 523.3  | E  | 807.4  | 404.2 | 790.4  | 789.4  | 6  |
| 6  | 669.4  | 335.2 | 652.3  | 651.4  | Q  | 678.4  |       | 661.4  |        | 5  |
| 7  | 768.4  | 384.7 | 751.4  | 750.4  | V  | 550.3  |       | 533.3  |        | 4  |
| 8  | 931.5  | 466.3 | 914.5  | 913.5  | Y  | 451.3  |       | 434.2  |        | 3  |
| 9  | 1044.6 | 522.8 | 1027.5 | 1026.6 | I  | 288.2  |       | 271.2  |        | 2  |
| 10 | 1218.7 | 609.9 | 1201.7 | 1200.7 | R  | 175.1  |       | 158.1  |        | 1  |

Gene symbol: Snx12

Protein name: 10 day old male pancreas cDNA, RIKEN full-length enriched library,  
clone:1810035A22 product:sorting nexin 12, full insert sequence

Protein accession numbers: IPI00468902,IPI00762269

Peptide sequence: (R)GDEGIFEESFIEER(R)

Exclusive (unique to this protein): TRUE

SEQUEST XCorr score: 2.05 SEQUEST DCn score: 0.707

Fix modifications: None

Variable modifications: None

charge: 2

Observed m/z: 828.8754

Actual minus calculated peptide mass (AMU): 0.003418

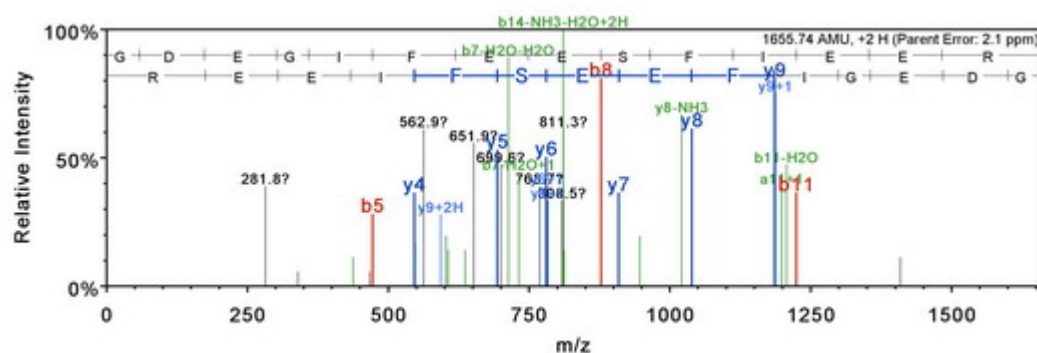

| B  | B ions | B+2H  | B-NH3  | B-H2O  | AA | Y ions | Y+2H  | Y-NH3  | Y-H2O  | Y  |
|----|--------|-------|--------|--------|----|--------|-------|--------|--------|----|
| 1  | 58.0   |       |        |        | G  | 1656.7 | 828.9 | 1639.7 | 1638.7 | 14 |
| 2  | 173.1  |       |        | 155.1  | D  | 1599.7 | 800.4 | 1582.7 | 1581.7 | 13 |
| 3  | 302.1  |       |        | 284.1  | E  | 1484.7 | 742.9 | 1467.7 | 1466.7 | 12 |
| 4  | 359.1  |       |        | 341.1  | G  | 1355.7 | 678.3 | 1338.6 | 1337.6 | 11 |
| 5  | 472.2  |       |        | 454.2  | I  | 1298.6 | 649.8 | 1281.6 | 1280.6 | 10 |
| 6  | 619.3  | 310.1 |        | 601.3  | F  | 1185.5 | 593.3 | 1168.5 | 1167.5 | 9  |
| 7  | 748.3  | 374.7 |        | 730.3  | E  | 1038.5 | 519.7 | 1021.5 | 1020.5 | 8  |
| 8  | 877.4  | 439.2 |        | 859.4  | E  | 909.4  | 455.2 | 892.4  | 891.4  | 7  |
| 9  | 964.4  | 482.7 |        | 946.4  | S  | 780.4  | 390.7 | 763.4  | 762.4  | 6  |
| 10 | 1111.5 | 556.2 |        | 1093.5 | F  | 693.4  |       | 676.3  | 675.4  | 5  |
| 11 | 1224.5 | 612.8 |        | 1206.5 | I  | 546.3  |       | 529.3  | 528.3  | 4  |
| 12 | 1353.6 | 677.3 |        | 1335.6 | E  | 433.2  |       | 416.2  | 415.2  | 3  |
| 13 | 1482.6 | 741.8 |        | 1464.6 | E  | 304.2  |       | 287.1  | 286.2  | 2  |
| 14 | 1656.7 | 828.9 | 1639.7 | 1638.7 | R  | 175.1  |       | 158.1  |        | 1  |

Gene symbol: Sod1

Protein name: Superoxide dismutase

Protein accession numbers: IPI00130589

Peptide sequence: (R)VISLSGEHSIIGR(T)

Exclusive (unique to this protein): TRUE

SEQUEST XCorr score: 2.98 SEQUEST DCn score: 0.607

Fix modifications: None

Variable modifications: None

charge: 2

Observed m/z: 684.3865

Actual minus calculated peptide mass (AMU): 0.0004883

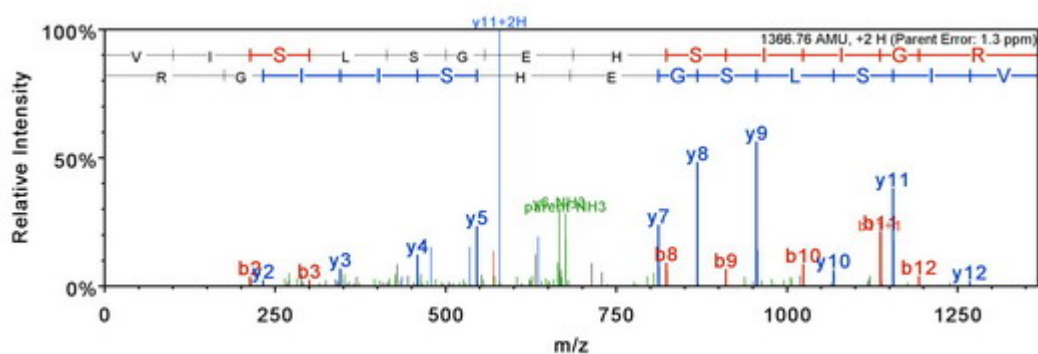

| B  | B ions | B+2H  | B-NH3  | B-H2O  | AA | Y ions | Y+2H  | Y-NH3  | Y-H2O  | Y  |
|----|--------|-------|--------|--------|----|--------|-------|--------|--------|----|
| 1  | 100.1  |       |        |        | V  | 1367.8 | 684.4 | 1350.7 | 1349.8 | 13 |
| 2  | 213.2  |       |        |        | I  | 1268.7 | 634.9 | 1251.7 | 1250.7 | 12 |
| 3  | 300.2  |       |        | 282.2  | S  | 1155.6 | 578.3 | 1138.6 | 1137.6 | 11 |
| 4  | 413.3  |       |        | 395.3  | L  | 1068.6 | 534.8 | 1051.5 | 1050.6 | 10 |
| 5  | 500.3  |       |        | 482.3  | S  | 955.5  | 478.3 | 938.5  | 937.5  | 9  |
| 6  | 557.3  | 279.2 |        | 539.3  | G  | 868.5  | 434.7 | 851.4  | 850.5  | 8  |
| 7  | 686.4  | 343.7 |        | 668.4  | E  | 811.4  | 406.2 | 794.4  | 793.4  | 7  |
| 8  | 823.4  | 412.2 |        | 805.4  | H  | 682.4  | 341.7 | 665.4  | 664.4  | 6  |
| 9  | 910.5  | 455.7 |        | 892.5  | S  | 545.3  |       | 528.3  | 527.3  | 5  |
| 10 | 1023.6 | 512.3 |        | 1005.5 | I  | 458.3  |       | 441.3  |        | 4  |
| 11 | 1136.6 | 568.8 |        | 1118.6 | I  | 345.2  |       | 328.2  |        | 3  |
| 12 | 1193.7 | 597.3 |        | 1175.6 | G  | 232.1  |       | 215.1  |        | 2  |
| 13 | 1367.8 | 684.4 | 1350.7 | 1349.8 | R  | 175.1  |       | 158.1  |        | 1  |

Gene symbol: Sox15

Protein name: SOX-15 protein

Protein accession numbers: IPI00118219

Peptide sequence: (K)RPMNAFMVWSSVQR(R)

Exclusive (unique to this protein): TRUE

SEQUEST XCorr score: 2.15 SEQUEST DCn score: 0.292

Fix modifications: None

Variable modifications: M3: Oxidation (+16.00)

charge: 2

Observed m/z: 862.9185

Actual minus calculated peptide mass (AMU): -0.0070758

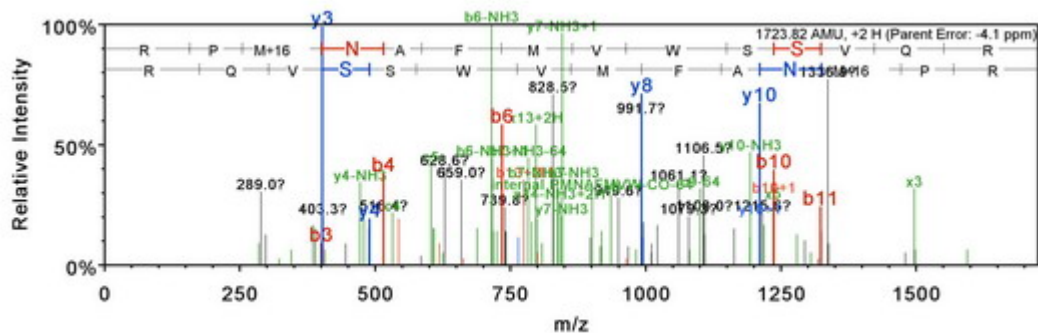

| B  | B Ions | B+2H  | B-NH3  | B-H2O  | A,A  | Y Ions | Y+2H  | Y-NH3  | Y-H2O  | Y  |
|----|--------|-------|--------|--------|------|--------|-------|--------|--------|----|
| 1  | 157.1  | 79.1  | 140.1  |        | R    | 1724.8 | 862.9 | 1707.8 | 1706.8 | 14 |
| 2  | 254.2  | 127.6 | 237.1  |        | P    | 1568.7 | 784.9 | 1551.7 | 1550.7 | 13 |
| 3  | 401.2  | 201.1 | 384.2  |        | M+16 | 1471.7 | 736.4 | 1454.7 | 1453.7 | 12 |
| 4  | 515.2  | 258.1 | 498.2  |        | N    | 1324.7 | 662.8 | 1307.6 | 1306.6 | 11 |
| 5  | 586.3  | 293.6 | 569.3  |        | A    | 1210.6 | 605.8 | 1193.6 | 1192.6 | 10 |
| 6  | 733.4  | 367.2 | 716.3  |        | F    | 1139.6 | 570.3 | 1122.5 | 1121.6 | 9  |
| 7  | 864.4  | 432.7 | 847.4  |        | M    | 992.5  | 496.8 | 975.5  | 974.5  | 8  |
| 8  | 963.5  | 482.2 | 946.4  |        | V    | 861.5  | 431.2 | 844.4  | 843.5  | 7  |
| 9  | 1149.5 | 575.3 | 1132.5 |        | W    | 762.4  | 381.7 | 745.4  | 744.4  | 6  |
| 10 | 1236.6 | 618.8 | 1219.5 | 1218.6 | S    | 576.3  |       | 559.3  | 558.3  | 5  |
| 11 | 1323.6 | 662.3 | 1306.6 | 1305.6 | S    | 489.3  |       | 472.3  | 471.3  | 4  |
| 12 | 1422.7 | 711.8 | 1405.6 | 1404.7 | V    | 402.3  |       | 385.2  |        | 3  |
| 13 | 1550.7 | 775.9 | 1533.7 | 1532.7 | Q    | 303.2  |       | 286.2  |        | 2  |
| 14 | 1724.8 | 862.9 | 1707.8 | 1706.8 | R    | 175.1  |       | 158.1  |        | 1  |

Gene symbol: Ssbp1

Protein name: single-stranded DNA binding protein 1 isoform 1

Protein accession numbers: IPI00408243

Peptide sequence: (R)QATTIADNIIFLSDQTK(E)

Exclusive (unique to this protein): TRUE

SEQUEST XCorr score: 2.12 SEQUEST DCn score: 0.341

Fix modifications: None

Variable modifications: None

charge: 2

Observed m/z: 996.5334

Actual minus calculated peptide mass (AMU): -0.0067152

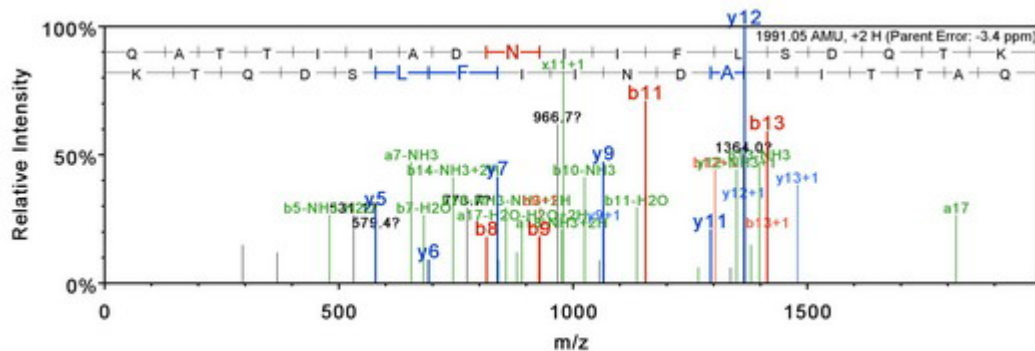

| B  | B Ions | B+2H  | B-NH3  | B-H2O  | AA | Y Ions | Y+2H  | Y-NH3  | Y-H2O  | Y  |
|----|--------|-------|--------|--------|----|--------|-------|--------|--------|----|
| 1  | 129.1  |       | 112.0  |        | Q  | 1992.1 | 996.5 | 1975.0 | 1974.1 | 18 |
| 2  | 200.1  |       | 183.1  |        | A  | 1864.0 | 932.5 | 1847.0 | 1846.0 | 17 |
| 3  | 301.2  |       | 284.1  | 283.1  | T  | 1793.0 | 897.0 | 1775.9 | 1775.0 | 16 |
| 4  | 402.2  |       | 385.2  | 384.2  | T  | 1691.9 | 846.5 | 1674.9 | 1673.9 | 15 |
| 5  | 515.3  |       | 498.3  | 497.3  | I  | 1590.9 | 795.9 | 1573.9 | 1572.9 | 14 |
| 6  | 628.4  | 314.7 | 611.3  | 610.4  | I  | 1477.8 | 739.4 | 1460.8 | 1459.8 | 13 |
| 7  | 699.4  | 350.2 | 682.4  | 681.4  | A  | 1364.7 | 682.9 | 1347.7 | 1346.7 | 12 |
| 8  | 814.4  | 407.7 | 797.4  | 796.4  | D  | 1293.7 | 647.3 | 1276.6 | 1275.7 | 11 |
| 9  | 928.5  | 464.7 | 911.5  | 910.5  | N  | 1178.6 | 589.8 | 1161.6 | 1160.6 | 10 |
| 10 | 1041.6 | 521.3 | 1024.5 | 1023.6 | I  | 1064.6 | 532.8 | 1047.6 | 1046.6 | 9  |
| 11 | 1154.6 | 577.8 | 1137.6 | 1136.6 | I  | 951.5  | 476.3 | 934.5  | 933.5  | 8  |
| 12 | 1301.7 | 651.4 | 1284.7 | 1283.7 | F  | 838.4  | 419.7 | 821.4  | 820.4  | 7  |
| 13 | 1414.8 | 707.9 | 1397.8 | 1396.8 | L  | 691.4  | 346.2 | 674.3  | 673.4  | 6  |
| 14 | 1501.8 | 751.4 | 1484.8 | 1483.8 | S  | 578.3  |       | 561.3  | 560.3  | 5  |
| 15 | 1616.9 | 808.9 | 1599.8 | 1598.8 | D  | 491.3  |       | 474.2  | 473.2  | 4  |
| 16 | 1744.9 | 873.0 | 1727.9 | 1726.9 | Q  | 376.2  |       | 359.2  | 358.2  | 3  |
| 17 | 1846.0 | 923.5 | 1828.9 | 1828.0 | T  | 248.2  |       | 231.1  | 230.2  | 2  |
| 18 | 1992.1 | 996.5 | 1975.0 | 1974.1 | K  | 147.1  |       | 130.1  |        | 1  |

Gene symbol: Ssr4

Protein name: 10 day old male pancreas cDNA, RIKEN full-length enriched library, clone:1810061C01 product:signal sequence receptor, delta, full insert sequence

Protein accession numbers: IPI00122346

Peptide sequence: (R)FFDEESYSLLR(K)

Exclusive (unique to this protein): TRUE

SEQUEST XCorr score: 2.48 SEQUEST DCn score: 0.649

Fix modifications: None

Variable modifications: None

charge: 2

Observed m/z: 703.3366

Actual minus calculated peptide mass (AMU): 0.001343

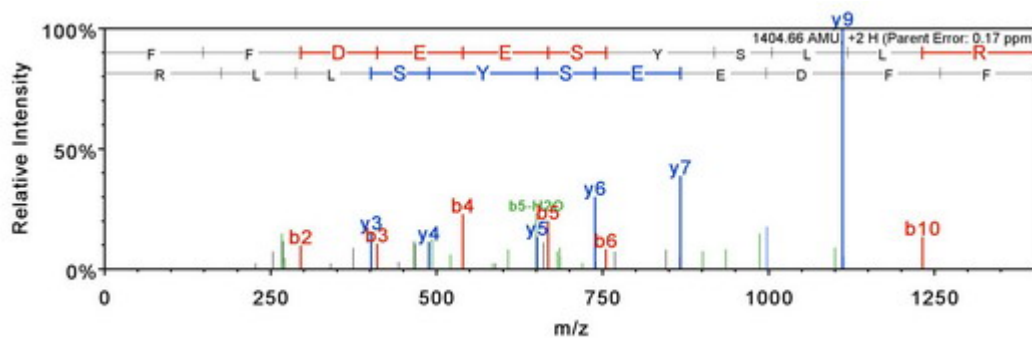

| B  | B Ions | B+2H  | B-NH3  | B-H2O  | AA | Y Ions | Y+2H  | Y-NH3  | Y-H2O  | Y  |
|----|--------|-------|--------|--------|----|--------|-------|--------|--------|----|
| 1  | 148.1  |       |        |        | F  | 1405.7 | 703.3 | 1388.6 | 1387.7 | 11 |
| 2  | 295.1  |       |        |        | F  | 1258.6 | 629.8 | 1241.6 | 1240.6 | 10 |
| 3  | 410.2  |       |        | 392.2  | D  | 1111.5 | 556.3 | 1094.5 | 1093.5 | 9  |
| 4  | 539.2  |       |        | 521.2  | E  | 996.5  | 498.8 | 979.5  | 978.5  | 8  |
| 5  | 668.3  |       |        | 650.3  | E  | 867.5  | 434.2 | 850.4  | 849.5  | 7  |
| 6  | 755.3  | 378.2 |        | 737.3  | S  | 738.4  | 369.7 | 721.4  | 720.4  | 6  |
| 7  | 918.4  | 459.7 |        | 900.3  | Y  | 651.4  |       | 634.4  | 633.4  | 5  |
| 8  | 1005.4 | 503.2 |        | 987.4  | S  | 488.3  |       | 471.3  | 470.3  | 4  |
| 9  | 1118.5 | 559.7 |        | 1100.5 | L  | 401.3  |       | 384.3  |        | 3  |
| 10 | 1231.5 | 616.3 |        | 1213.5 | L  | 288.2  |       | 271.2  |        | 2  |
| 11 | 1405.7 | 703.3 | 1388.6 | 1387.7 | R  | 175.1  |       | 158.1  |        | 1  |

Gene symbol: Stip1

Protein name: Stress-induced-phosphoprotein 1

Protein accession numbers: IPI00121514

Peptide sequence: (R)LAYINPDLALEEK(N)

Exclusive (unique to this protein): TRUE

SEQUEST XCorr score: 2.47 SEQUEST DCn score: 0.469

Fix modifications: None

Variable modifications: None

charge: 2

Observed m/z: 744.8987

Actual minus calculated peptide mass (AMU): -0.005493

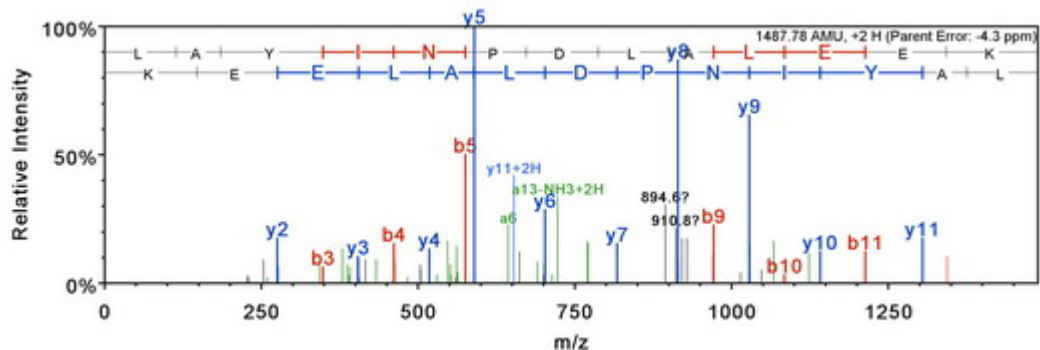

| B  | B Ions | B+2H  | B-NH3  | B-H2O  | AA | Y Ions | Y+2H  | Y-NH3  | Y-H2O  | Y  |
|----|--------|-------|--------|--------|----|--------|-------|--------|--------|----|
| 1  | 114.1  |       |        |        | L  | 1488.8 | 744.9 | 1471.8 | 1470.8 | 13 |
| 2  | 185.1  |       |        |        | A  | 1375.7 | 688.4 | 1358.7 | 1357.7 | 12 |
| 3  | 348.2  |       |        |        | Y  | 1304.7 | 652.8 | 1287.7 | 1286.7 | 11 |
| 4  | 461.3  |       |        |        | I  | 1141.6 | 571.3 | 1124.6 | 1123.6 | 10 |
| 5  | 575.3  |       | 558.3  |        | N  | 1028.5 | 514.8 | 1011.5 | 1010.5 | 9  |
| 6  | 672.4  | 336.7 | 655.4  |        | P  | 914.5  | 457.8 | 897.5  | 896.5  | 8  |
| 7  | 787.4  | 394.2 | 770.4  | 769.4  | D  | 817.4  | 409.2 | 800.4  | 799.4  | 7  |
| 8  | 900.5  | 450.8 | 883.5  | 882.5  | L  | 702.4  | 351.7 | 685.4  | 684.4  | 6  |
| 9  | 971.5  | 486.3 | 954.5  | 953.5  | A  | 589.3  |       | 572.3  | 571.3  | 5  |
| 10 | 1084.6 | 542.8 | 1067.6 | 1066.6 | L  | 518.3  |       | 501.3  | 500.3  | 4  |
| 11 | 1213.7 | 607.3 | 1196.6 | 1195.6 | E  | 405.2  |       | 388.2  | 387.2  | 3  |
| 12 | 1342.7 | 671.9 | 1325.7 | 1324.7 | E  | 276.2  |       | 259.1  | 258.1  | 2  |
| 13 | 1488.8 | 744.9 | 1471.8 | 1470.8 | K  | 147.1  |       | 130.1  |        | 1  |



Gene symbol: Stx12

Protein name: Syntaxin-12

Protein accession numbers: IPI00111416

Peptide sequence: (R)DFNSIIQTCSGNIQR(I)

Exclusive (unique to this protein): TRUE

SEQUEST XCorr score: 2.41 SEQUEST DCn score: 0.433

Fix modifications: C9: Carbamidomethyl (+57.02) Variable modifications: None  
charge: 2 Observed m/z: 876.9184

Actual minus calculated peptide mass (AMU): -0.005127

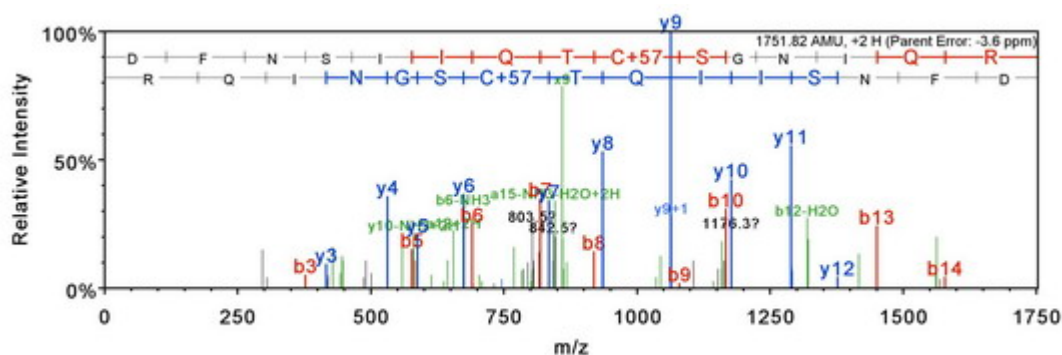

| B  | B ions | B+2H  | B-NH3  | B-H2O  | AA   | Y ions | Y+2H  | Y-NH3  | Y-H2O  | Y  |
|----|--------|-------|--------|--------|------|--------|-------|--------|--------|----|
| 1  | 116.0  |       |        | 98.0   | D    | 1752.8 | 876.9 | 1735.8 | 1734.8 | 15 |
| 2  | 263.1  |       |        | 245.1  | F    | 1637.8 | 819.4 | 1620.8 | 1619.8 | 14 |
| 3  | 377.2  |       | 360.1  | 359.1  | N    | 1490.7 | 745.9 | 1473.7 | 1472.7 | 13 |
| 4  | 464.2  |       | 447.2  | 446.2  | S    | 1376.7 | 688.9 | 1359.7 | 1358.7 | 12 |
| 5  | 577.3  |       | 560.2  | 559.3  | I    | 1289.7 | 645.3 | 1272.6 | 1271.7 | 11 |
| 6  | 690.4  | 345.7 | 673.3  | 672.3  | I    | 1176.6 | 588.8 | 1159.5 | 1158.6 | 10 |
| 7  | 818.4  | 409.7 | 801.4  | 800.4  | Q    | 1063.5 | 532.3 | 1046.5 | 1045.5 | 9  |
| 8  | 919.5  | 460.2 | 902.4  | 901.4  | T    | 935.4  | 468.2 | 918.4  | 917.4  | 8  |
| 9  | 1079.5 | 540.3 | 1062.5 | 1061.5 | C+57 | 834.4  | 417.7 | 817.4  | 816.4  | 7  |
| 10 | 1166.5 | 583.8 | 1149.5 | 1148.5 | S    | 674.4  | 337.7 | 657.3  | 656.4  | 6  |
| 11 | 1223.5 | 612.3 | 1206.5 | 1205.5 | G    | 587.3  |       | 570.3  |        | 5  |
| 12 | 1337.6 | 669.3 | 1320.5 | 1319.6 | N    | 530.3  |       | 513.3  |        | 4  |
| 13 | 1450.7 | 725.8 | 1433.6 | 1432.7 | I    | 416.3  |       | 399.2  |        | 3  |
| 14 | 1578.7 | 789.9 | 1561.7 | 1560.7 | Q    | 303.2  |       | 286.2  |        | 2  |
| 15 | 1752.8 | 876.9 | 1735.8 | 1734.8 | R    | 175.1  |       | 158.1  |        | 1  |

Gene symbol: Surf4

Protein name: Surfeit locus protein 4

Protein accession numbers: IPI00133249

Peptide sequence: (R)LCLISTFLEDGIR(M)

Exclusive (unique to this protein): TRUE

SEQUEST XCorr score: 2.21 SEQUEST DCn score: 0.64

Fix modifications: C2: Carbamidomethyl (+57.02) Variable modifications: None  
charge: 2 Observed m/z: 768.9055

Actual minus calculated peptide mass (AMU): -0.006836

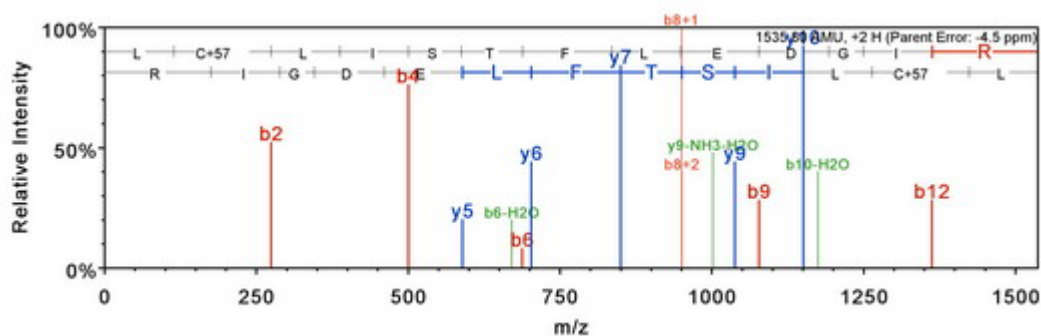

| B  | B ions | B+2H  | B-NH3  | B-H2O  | AA   | Y ions | Y+2H  | Y-NH3  | Y-H2O  | Y  |
|----|--------|-------|--------|--------|------|--------|-------|--------|--------|----|
| 1  | 114.1  |       |        |        | L    | 1536.8 | 768.9 | 1519.8 | 1518.8 | 13 |
| 2  | 274.1  |       |        |        | C+57 | 1423.7 | 712.4 | 1406.7 | 1405.7 | 12 |
| 3  | 387.2  |       |        |        | L    | 1263.7 | 632.4 | 1246.7 | 1245.7 | 11 |
| 4  | 500.3  |       |        |        | I    | 1150.6 | 575.8 | 1133.6 | 1132.6 | 10 |
| 5  | 587.3  |       |        | 569.3  | S    | 1037.5 | 519.3 | 1020.5 | 1019.5 | 9  |
| 6  | 688.4  | 344.7 |        | 670.4  | T    | 950.5  | 475.8 | 933.5  | 932.5  | 8  |
| 7  | 835.4  | 418.2 |        | 817.4  | F    | 849.5  | 425.2 | 832.4  | 831.4  | 7  |
| 8  | 948.5  | 474.8 |        | 930.5  | L    | 702.4  | 351.7 | 685.4  | 684.4  | 6  |
| 9  | 1077.6 | 539.3 |        | 1059.6 | E    | 589.3  |       | 572.3  | 571.3  | 5  |
| 10 | 1192.6 | 596.8 |        | 1174.6 | D    | 460.3  |       | 443.2  | 442.2  | 4  |
| 11 | 1249.6 | 625.3 |        | 1231.6 | G    | 345.2  |       | 328.2  |        | 3  |
| 12 | 1362.7 | 681.9 |        | 1344.7 | I    | 288.2  |       | 271.2  |        | 2  |
| 13 | 1536.8 | 768.9 | 1519.8 | 1518.8 | R    | 175.1  |       | 158.1  |        | 1  |

Gene symbol: Tatdn2

Protein name: Activated spleen cDNA, RIKEN full-length enriched library, clone:F830011G01  
 product:similar to Putative deoxyribonuclease KIAA0218

Protein accession numbers: IPI00622729,IPI00762372

Peptide sequence: (R)HPKAVAFGEMGLDYSHK(C)

Exclusive (unique to this protein): TRUE

SEQUEST XCorr score: 2.04 SEQUEST DCn score: 0.377

Fix modifications: None

Variable modifications: None

charge: 2

Observed m/z: 943.9716

Actual minus calculated peptide mass (AMU): 0.01285

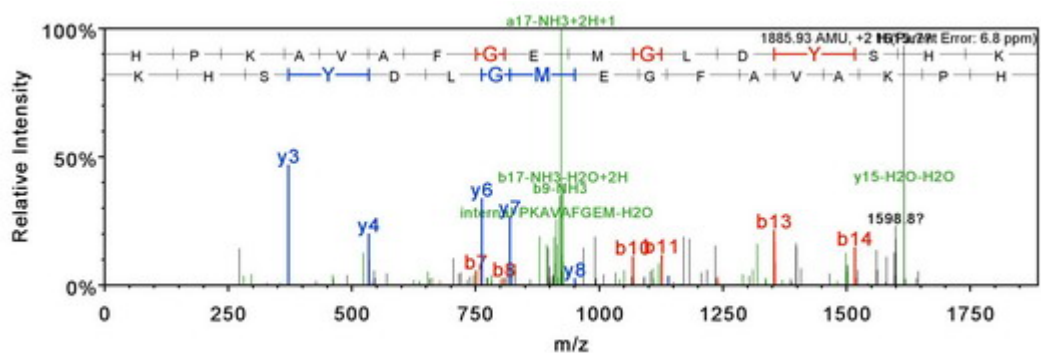

| B  | B Ions | B+2H  | B-NH3  | B-H2O  | AA | Y Ions | Y+2H  | Y-NH3  | Y-H2O  | Y  |
|----|--------|-------|--------|--------|----|--------|-------|--------|--------|----|
| 1  | 138.1  | 69.5  |        |        | H  | 1886.9 | 944.0 | 1869.9 | 1868.9 | 17 |
| 2  | 235.1  | 118.1 |        |        | P  | 1749.9 | 875.4 | 1732.8 | 1731.9 | 16 |
| 3  | 363.2  | 182.1 | 346.2  |        | K  | 1652.8 | 826.9 | 1635.8 | 1634.8 | 15 |
| 4  | 434.3  | 217.6 | 417.2  |        | A  | 1524.7 | 762.9 | 1507.7 | 1506.7 | 14 |
| 5  | 533.3  | 267.2 | 516.3  |        | V  | 1453.7 | 727.3 | 1436.7 | 1435.7 | 13 |
| 6  | 604.4  | 302.7 | 587.3  |        | A  | 1354.6 | 677.8 | 1337.6 | 1336.6 | 12 |
| 7  | 751.4  | 376.2 | 734.4  |        | F  | 1283.6 | 642.3 | 1266.5 | 1265.6 | 11 |
| 8  | 808.5  | 404.7 | 791.4  |        | G  | 1136.5 | 568.8 | 1119.5 | 1118.5 | 10 |
| 9  | 937.5  | 469.3 | 920.5  | 919.5  | E  | 1079.5 | 540.3 | 1062.5 | 1061.5 | 9  |
| 10 | 1068.5 | 534.8 | 1051.5 | 1050.5 | M  | 950.4  | 475.7 | 933.4  | 932.4  | 8  |
| 11 | 1125.5 | 563.3 | 1108.5 | 1107.5 | G  | 819.4  | 410.2 | 802.4  | 801.4  | 7  |
| 12 | 1238.6 | 619.8 | 1221.6 | 1220.6 | L  | 762.4  | 381.7 | 745.4  | 744.4  | 6  |
| 13 | 1353.7 | 677.3 | 1336.6 | 1335.7 | D  | 649.3  | 325.2 | 632.3  | 631.3  | 5  |
| 14 | 1516.7 | 758.9 | 1499.7 | 1498.7 | Y  | 534.3  | 267.6 | 517.2  | 516.3  | 4  |
| 15 | 1603.8 | 802.4 | 1586.7 | 1585.8 | S  | 371.2  | 186.1 | 354.2  | 353.2  | 3  |
| 16 | 1740.8 | 870.9 | 1723.8 | 1722.8 | H  | 284.2  | 142.6 | 267.1  |        | 2  |
| 17 | 1886.9 | 944.0 | 1869.9 | 1868.9 | K  | 147.1  |       | 130.1  |        | 1  |

Gene symbol: Tbcc

Protein name: Tubulin-specific chaperone C

Protein accession numbers: IPI00122348

Peptide sequence: (R)QGQAALAQLQAVLTER(R)

Exclusive (unique to this protein): TRUE

SEQUEST XCorr score: 2.28 SEQUEST DCn score: 0.468

Fix modifications: None

Variable modifications: None

charge: 2

Observed m/z: 848.9725

Actual minus calculated peptide mass (AMU): 0.002319

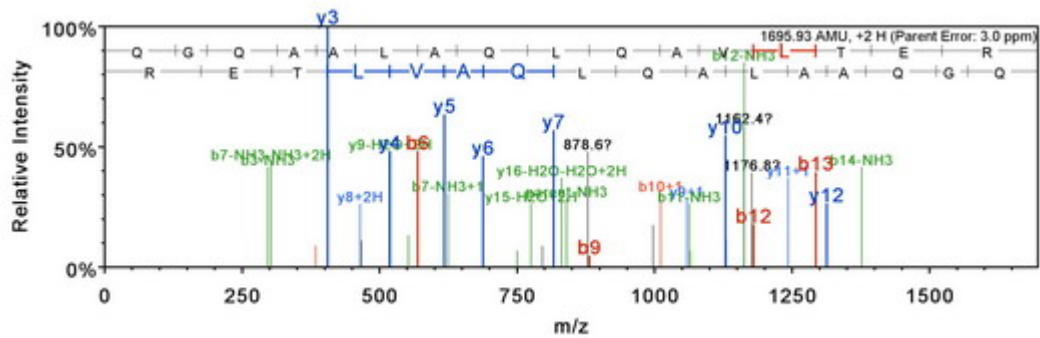

| B  | B Ions | B+2H  | B-NH3  | B-H2O  | AA | Y Ions | Y+2H  | Y-NH3  | Y-H2O  | Y  |
|----|--------|-------|--------|--------|----|--------|-------|--------|--------|----|
| 1  | 129.1  |       | 112.0  |        | Q  | 1696.9 | 849.0 | 1679.9 | 1678.9 | 16 |
| 2  | 186.1  |       | 169.1  |        | G  | 1568.9 | 784.9 | 1551.9 | 1550.9 | 15 |
| 3  | 314.2  |       | 297.1  |        | Q  | 1511.9 | 756.4 | 1494.8 | 1493.8 | 14 |
| 4  | 385.2  |       | 368.2  |        | A  | 1383.8 | 692.4 | 1366.8 | 1365.8 | 13 |
| 5  | 456.2  |       | 439.2  |        | A  | 1312.8 | 656.9 | 1295.7 | 1294.8 | 12 |
| 6  | 569.3  | 285.2 | 552.3  |        | L  | 1241.7 | 621.4 | 1224.7 | 1223.7 | 11 |
| 7  | 640.3  | 320.7 | 623.3  |        | A  | 1128.6 | 564.8 | 1111.6 | 1110.6 | 10 |
| 8  | 768.4  | 384.7 | 751.4  |        | Q  | 1057.6 | 529.3 | 1040.6 | 1039.6 | 9  |
| 9  | 881.5  | 441.3 | 864.5  |        | L  | 929.5  | 465.3 | 912.5  | 911.5  | 8  |
| 10 | 1009.5 | 505.3 | 992.5  |        | Q  | 816.5  | 408.7 | 799.4  | 798.5  | 7  |
| 11 | 1080.6 | 540.8 | 1063.5 |        | A  | 688.4  | 344.7 | 671.4  | 670.4  | 6  |
| 12 | 1179.7 | 590.3 | 1162.6 |        | V  | 617.4  |       | 600.3  | 599.4  | 5  |
| 13 | 1292.7 | 646.9 | 1275.7 |        | L  | 518.3  |       | 501.3  | 500.3  | 4  |
| 14 | 1393.8 | 697.4 | 1376.8 | 1375.8 | T  | 405.2  |       | 388.2  | 387.2  | 3  |
| 15 | 1522.8 | 761.9 | 1505.8 | 1504.8 | E  | 304.2  |       | 287.1  | 286.2  | 2  |
| 16 | 1696.9 | 849.0 | 1679.9 | 1678.9 | R  | 175.1  |       | 158.1  |        | 1  |

Gene symbol: Tceb2

Protein name: Transcription elongation factor B polypeptide 2

Protein accession numbers: IPI00131224

Peptide sequence: (R)PQAPATVGLAFR(A)

Exclusive (unique to this protein): TRUE

SEQUEST XCorr score: 2.12 SEQUEST DCn score: 0.749

Fix modifications: None

Variable modifications: None

charge: 2

Observed m/z: 614.3461

Actual minus calculated peptide mass (AMU): -0.0007324

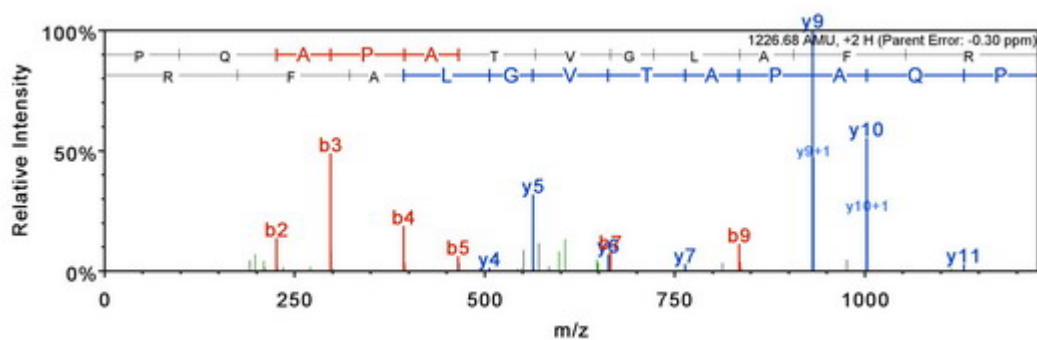

| B  | B Ions | B+2H  | B-NH3  | B-H2O  | AA | Y Ions | Y+2H  | Y-NH3  | Y-H2O  | Y  |
|----|--------|-------|--------|--------|----|--------|-------|--------|--------|----|
| 1  | 98.1   |       |        |        | P  | 1227.7 | 614.4 | 1210.7 | 1209.7 | 12 |
| 2  | 226.1  |       | 209.1  |        | Q  | 1130.6 | 565.8 | 1113.6 | 1112.6 | 11 |
| 3  | 297.2  |       | 280.1  |        | A  | 1002.6 | 501.8 | 985.6  | 984.6  | 10 |
| 4  | 394.2  |       | 377.2  |        | P  | 931.5  | 466.3 | 914.5  | 913.5  | 9  |
| 5  | 465.3  |       | 448.2  |        | A  | 834.5  | 417.8 | 817.5  | 816.5  | 8  |
| 6  | 566.3  | 283.7 | 549.3  | 548.3  | T  | 763.5  | 382.2 | 746.4  | 745.4  | 7  |
| 7  | 665.4  | 333.2 | 648.3  | 647.4  | V  | 662.4  | 331.7 | 645.4  |        | 6  |
| 8  | 722.4  | 361.7 | 705.4  | 704.4  | G  | 563.3  |       | 546.3  |        | 5  |
| 9  | 835.5  | 418.2 | 818.4  | 817.5  | L  | 506.3  |       | 489.3  |        | 4  |
| 10 | 906.5  | 453.8 | 889.5  | 888.5  | A  | 393.2  |       | 376.2  |        | 3  |
| 11 | 1053.6 | 527.3 | 1036.5 | 1035.6 | F  | 322.2  |       | 305.2  |        | 2  |
| 12 | 1227.7 | 614.4 | 1210.7 | 1209.7 | R  | 175.1  |       | 158.1  |        | 1  |

Gene symbol: Tc11b1

Protein name: TCL1B1 protein

Protein accession numbers: IPI00116164

Peptide sequence: (R)NIYWATDGTGTHWR(L)

Exclusive (unique to this protein): TRUE

SEQUEST XCorr score: 2.86 SEQUEST DCn score: 0.591

Fix modifications: None

Variable modifications: None

charge: 2

Observed m/z: 760.3546

Actual minus calculated peptide mass (AMU): -0.006958

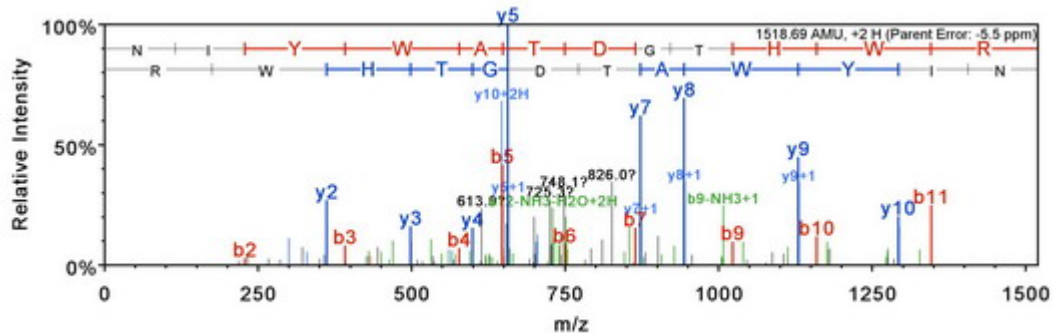

| B  | B Ions | B+2H  | B-NH3  | B-H2O  | AA | Y Ions | Y+2H  | Y-NH3  | Y-H2O  | Y  |
|----|--------|-------|--------|--------|----|--------|-------|--------|--------|----|
| 1  | 115.1  |       | 98.0   |        | N  | 1519.7 | 760.4 | 1502.7 | 1501.7 | 12 |
| 2  | 228.1  |       | 211.1  |        | I  | 1405.7 | 703.3 | 1388.6 | 1387.7 | 11 |
| 3  | 391.2  |       | 374.2  |        | Y  | 1292.6 | 646.8 | 1275.5 | 1274.6 | 10 |
| 4  | 577.3  |       | 560.3  |        | W  | 1129.5 | 565.3 | 1112.5 | 1111.5 | 9  |
| 5  | 648.3  |       | 631.3  |        | A  | 943.4  | 472.2 | 926.4  | 925.4  | 8  |
| 6  | 749.4  | 375.2 | 732.3  | 731.4  | T  | 872.4  | 436.7 | 855.4  | 854.4  | 7  |
| 7  | 864.4  | 432.7 | 847.4  | 846.4  | D  | 771.4  | 386.2 | 754.3  | 753.3  | 6  |
| 8  | 921.4  | 461.2 | 904.4  | 903.4  | G  | 656.3  | 328.7 | 639.3  | 638.3  | 5  |
| 9  | 1022.5 | 511.7 | 1005.4 | 1004.5 | T  | 599.3  | 300.2 | 582.3  | 581.3  | 4  |
| 10 | 1159.5 | 580.3 | 1142.5 | 1141.5 | H  | 498.3  | 249.6 | 481.2  |        | 3  |
| 11 | 1345.6 | 673.3 | 1328.6 | 1327.6 | W  | 361.2  |       | 344.2  |        | 2  |
| 12 | 1519.7 | 760.4 | 1502.7 | 1501.7 | R  | 175.1  |       | 158.1  |        | 1  |

Gene symbol: Tc1b2

Protein name: TCL1B2 protein

Protein accession numbers: IPI00116165

Peptide sequence: (R)LLPQVLISTGPGFYEDEHHR(L)

Exclusive (unique to this protein): TRUE

SEQUEST XCorr score: 2.05 SEQUEST DCn score: 0.597

Fix modifications: None

Variable modifications: None

charge: 2

Observed m/z: 1154.5868

Actual minus calculated peptide mass (AMU): -0.0070758

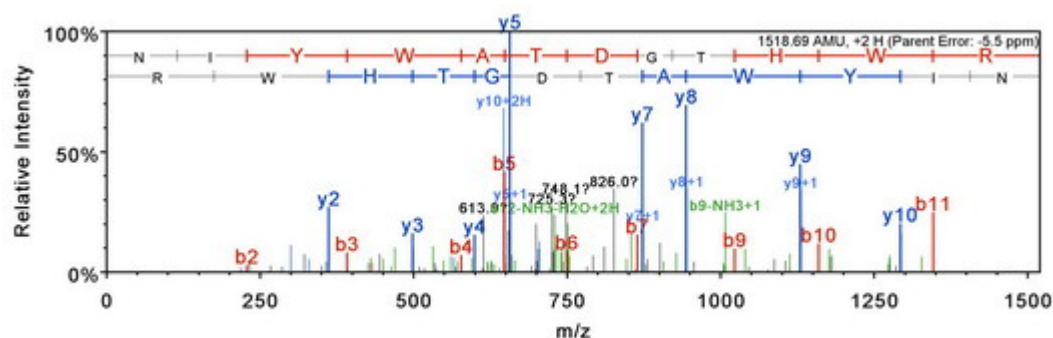

| B  | B ions | B+2H  | B-NH3  | B-H2O  | AA | Y ions | Y+2H  | Y-NH3  | Y-H2O  | Y  |
|----|--------|-------|--------|--------|----|--------|-------|--------|--------|----|
| 1  | 115.1  |       | 98.0   |        | N  | 1519.7 | 760.4 | 1502.7 | 1501.7 | 12 |
| 2  | 228.1  |       | 211.1  |        | I  | 1405.7 | 703.3 | 1388.6 | 1387.7 | 11 |
| 3  | 391.2  |       | 374.2  |        | Y  | 1292.6 | 646.8 | 1275.5 | 1274.6 | 10 |
| 4  | 577.3  |       | 560.3  |        | W  | 1129.5 | 565.3 | 1112.5 | 1111.5 | 9  |
| 5  | 648.3  |       | 631.3  |        | A  | 943.4  | 472.2 | 926.4  | 925.4  | 8  |
| 6  | 749.4  | 375.2 | 732.3  | 731.4  | T  | 872.4  | 436.7 | 855.4  | 854.4  | 7  |
| 7  | 864.4  | 432.7 | 847.4  | 846.4  | D  | 771.4  | 386.2 | 754.3  | 753.3  | 6  |
| 8  | 921.4  | 461.2 | 904.4  | 903.4  | G  | 656.3  | 328.7 | 639.3  | 638.3  | 5  |
| 9  | 1022.5 | 511.7 | 1005.4 | 1004.5 | T  | 599.3  | 300.2 | 582.3  | 581.3  | 4  |
| 10 | 1159.5 | 580.3 | 1142.5 | 1141.5 | H  | 498.3  | 249.6 | 481.2  |        | 3  |
| 11 | 1345.6 | 673.3 | 1328.6 | 1327.6 | W  | 361.2  |       | 344.2  |        | 2  |
| 12 | 1519.7 | 760.4 | 1502.7 | 1501.7 | R  | 175.1  |       | 158.1  |        | 1  |

Gene symbol: Them2

Protein name: Thioesterase superfamily member 2

Protein accession numbers: IPI00132958

Peptide sequence: (K)TLAFASVDLTNK(T)

Exclusive (unique to this protein): TRUE

SEQUEST XCorr score: 3.04 SEQUEST DCn score: 0.587

Fix modifications: None

Variable modifications: None

charge: 2

Observed m/z: 640.3446

Actual minus calculated peptide mass (AMU): -0.008423

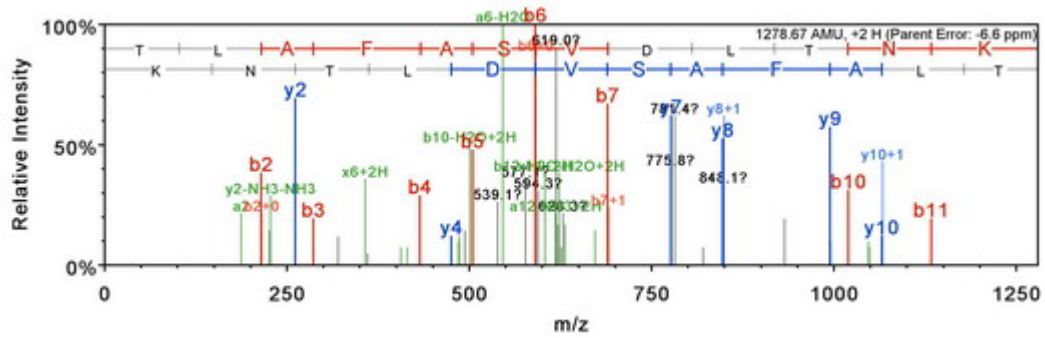

| B  | B Ions | B+2H  | B-NH3  | B-H2O  | A,A | Y Ions | Y+2H  | Y-NH3  | Y-H2O  | Y  |
|----|--------|-------|--------|--------|-----|--------|-------|--------|--------|----|
| 1  | 102.1  |       |        | 84.0   | T   | 1279.7 | 640.4 | 1262.7 | 1261.7 | 12 |
| 2  | 215.1  |       |        | 197.1  | L   | 1178.6 | 589.8 | 1161.6 | 1160.6 | 11 |
| 3  | 286.2  |       |        | 268.2  | A   | 1065.6 | 533.3 | 1048.5 | 1047.5 | 10 |
| 4  | 433.3  |       |        | 415.2  | F   | 994.5  | 497.8 | 977.5  | 976.5  | 9  |
| 5  | 504.3  |       |        | 486.3  | A   | 847.5  | 424.2 | 830.4  | 829.4  | 8  |
| 6  | 591.3  | 296.2 |        | 573.3  | S   | 776.4  | 388.7 | 759.4  | 758.4  | 7  |
| 7  | 690.4  | 345.7 |        | 672.4  | V   | 689.4  | 345.2 | 672.4  | 671.4  | 6  |
| 8  | 805.4  | 403.2 |        | 787.4  | D   | 590.3  |       | 573.3  | 572.3  | 5  |
| 9  | 918.5  | 459.8 |        | 900.5  | L   | 475.3  |       | 458.3  | 457.3  | 4  |
| 10 | 1019.5 | 510.3 |        | 1001.5 | T   | 362.2  |       | 345.2  | 344.2  | 3  |
| 11 | 1133.6 | 567.3 | 1116.6 | 1115.6 | N   | 261.2  |       | 244.1  |        | 2  |
| 12 | 1279.7 | 640.4 | 1262.7 | 1261.7 | K   | 147.1  |       | 130.1  |        | 1  |

Gene symbol: Timm44

Protein name: Import inner membrane translocase subunit TIM44, mitochondrial precursor

Protein accession numbers: IPI00135068

Peptide sequence: (K)ELDESVLGQTGPYR(R)

Exclusive (unique to this protein): TRUE

SEQUEST XCorr score: 2.02 SEQUEST DCn score: 0.557

Fix modifications: None

Variable modifications: None

charge: 2

Observed m/z: 782.3824

Actual minus calculated peptide mass (AMU): -0.008667

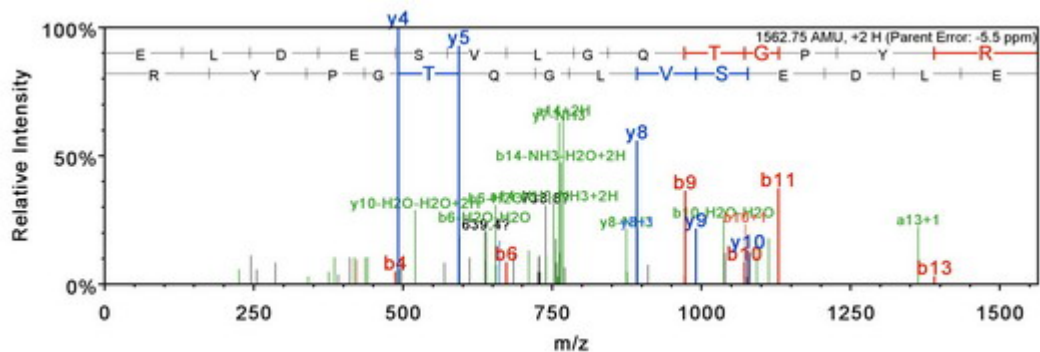

| B  | B Ions | B+2H  | B-NH3  | B-H2O  | A,A | Y Ions | Y+2H  | Y-NH3  | Y-H2O  | Y  |
|----|--------|-------|--------|--------|-----|--------|-------|--------|--------|----|
| 1  | 130.1  |       |        | 112.0  | E   | 1563.8 | 782.4 | 1546.7 | 1545.8 | 14 |
| 2  | 243.1  |       |        | 225.1  | L   | 1434.7 | 717.9 | 1417.7 | 1416.7 | 13 |
| 3  | 358.2  |       |        | 340.2  | D   | 1321.6 | 661.3 | 1304.6 | 1303.6 | 12 |
| 4  | 487.2  |       |        | 469.2  | E   | 1206.6 | 603.8 | 1189.6 | 1188.6 | 11 |
| 5  | 574.2  |       |        | 556.2  | S   | 1077.6 | 539.3 | 1060.5 | 1059.6 | 10 |
| 6  | 673.3  | 337.2 |        | 655.3  | V   | 990.5  | 495.8 | 973.5  | 972.5  | 9  |
| 7  | 786.4  | 393.7 |        | 768.4  | L   | 891.5  | 446.2 | 874.4  | 873.5  | 8  |
| 8  | 843.4  | 422.2 |        | 825.4  | G   | 778.4  | 389.7 | 761.4  | 760.4  | 7  |
| 9  | 971.5  | 486.2 | 954.4  | 953.5  | Q   | 721.4  | 361.2 | 704.3  | 703.4  | 6  |
| 10 | 1072.5 | 536.8 | 1055.5 | 1054.5 | T   | 593.3  |       | 576.3  | 575.3  | 5  |
| 11 | 1129.5 | 565.3 | 1112.5 | 1111.5 | G   | 492.3  |       | 475.2  |        | 4  |
| 12 | 1226.6 | 613.8 | 1209.6 | 1208.6 | P   | 435.2  |       | 418.2  |        | 3  |
| 13 | 1389.7 | 695.3 | 1372.6 | 1371.6 | Y   | 338.2  |       | 321.2  |        | 2  |
| 14 | 1563.8 | 782.4 | 1546.7 | 1545.8 | R   | 175.1  |       | 158.1  |        | 1  |

Gene symbol: Tmem109

Protein name: Transmembrane protein 109 precursor

Protein accession numbers: IPI00153101

Peptide sequence: (K)ETSADILTQIGR(S)

Exclusive (unique to this protein): TRUE

SEQUEST XCorr score: 2.17 SEQUEST DCn score: 0.482

Fix modifications: None

Variable modifications: None

charge: 2

Observed m/z: 652.3472

Actual minus calculated peptide mass (AMU): 0.0004883

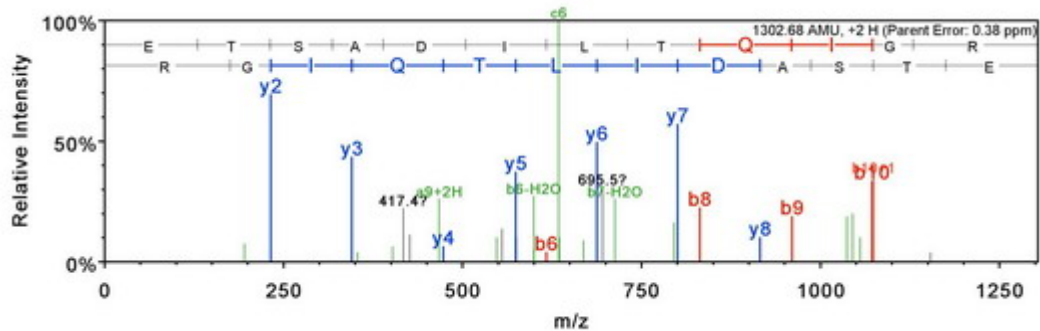

| B  | B Ions | B+2H  | B-NH3  | B-H2O  | A,A | Y Ions | Y+2H  | Y-NH3  | Y-H2O  | Y  |
|----|--------|-------|--------|--------|-----|--------|-------|--------|--------|----|
| 1  | 130.1  |       |        | 112.0  | E   | 1303.7 | 652.4 | 1286.7 | 1285.7 | 12 |
| 2  | 231.1  |       |        | 213.1  | T   | 1174.6 | 587.8 | 1157.6 | 1156.6 | 11 |
| 3  | 318.1  |       |        | 300.1  | S   | 1073.6 | 537.3 | 1056.6 | 1055.6 | 10 |
| 4  | 389.2  |       |        | 371.2  | A   | 986.6  | 493.8 | 969.5  | 968.6  | 9  |
| 5  | 504.2  |       |        | 486.2  | D   | 915.5  | 458.3 | 898.5  | 897.5  | 8  |
| 6  | 617.3  | 309.1 |        | 599.3  | I   | 800.5  | 400.8 | 783.5  | 782.5  | 7  |
| 7  | 730.4  | 365.7 |        | 712.4  | L   | 687.4  | 344.2 | 670.4  | 669.4  | 6  |
| 8  | 831.4  | 416.2 |        | 813.4  | T   | 574.3  |       | 557.3  | 556.3  | 5  |
| 9  | 959.5  | 480.2 | 942.4  | 941.5  | Q   | 473.3  |       | 456.3  |        | 4  |
| 10 | 1072.5 | 536.8 | 1055.5 | 1054.5 | I   | 345.2  |       | 328.2  |        | 3  |
| 11 | 1129.6 | 565.3 | 1112.5 | 1111.6 | G   | 232.1  |       | 215.1  |        | 2  |
| 12 | 1303.7 | 652.4 | 1286.7 | 1285.7 | R   | 175.1  |       | 158.1  |        | 1  |



Gene symbol: Tmem11

Protein name: Transmembrane protein 11

Protein accession numbers: IPI00222447

Peptide sequence: (R)LPLHTLSSTPVVLR(K)

Exclusive (unique to this protein): TRUE

SEQUEST XCorr score: 2.23 SEQUEST DCn score: 0.577

Fix modifications: None

Variable modifications: None

charge: 2

Observed m/z: 867.0162

Actual minus calculated peptide mass (AMU): -0.008057

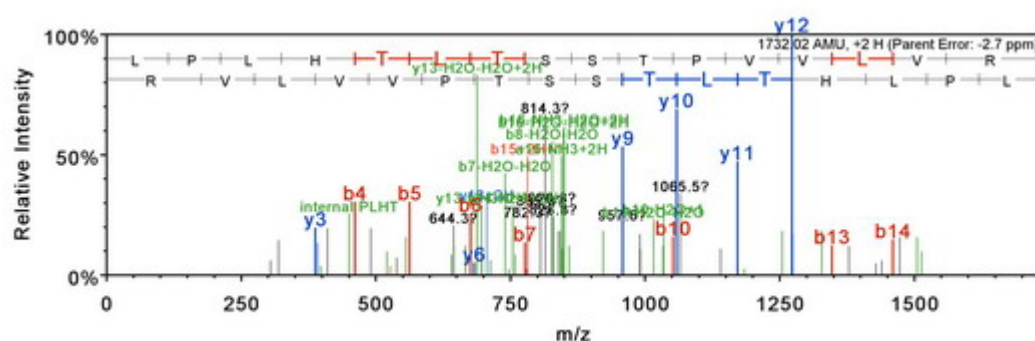

| B  | B ions | B+2H  | B-NH3  | B-H2O  | A,A | Y ions | Y+2H  | Y-NH3  | Y-H2O  | Y  |
|----|--------|-------|--------|--------|-----|--------|-------|--------|--------|----|
| 1  | 114.1  |       |        |        | L   | 1733.0 | 867.0 | 1716.0 | 1715.0 | 16 |
| 2  | 211.1  |       |        |        | P   | 1620.0 | 810.5 | 1602.9 | 1601.9 | 15 |
| 3  | 324.2  |       |        |        | L   | 1522.9 | 762.0 | 1505.9 | 1504.9 | 14 |
| 4  | 461.3  | 231.2 |        |        | H   | 1409.8 | 705.4 | 1392.8 | 1391.8 | 13 |
| 5  | 562.3  | 281.7 |        | 544.3  | T   | 1272.8 | 636.9 | 1255.7 | 1254.7 | 12 |
| 6  | 675.4  | 338.2 |        | 657.4  | L   | 1171.7 | 586.4 | 1154.7 | 1153.7 | 11 |
| 7  | 776.5  | 388.7 |        | 758.5  | T   | 1058.6 | 529.8 | 1041.6 | 1040.6 | 10 |
| 8  | 863.5  | 432.3 |        | 845.5  | S   | 957.6  | 479.3 | 940.6  | 939.6  | 9  |
| 9  | 950.5  | 475.8 |        | 932.5  | S   | 870.5  | 435.8 | 853.5  | 852.5  | 8  |
| 10 | 1051.6 | 526.3 |        | 1033.6 | T   | 783.5  | 392.3 | 766.5  | 765.5  | 7  |
| 11 | 1148.6 | 574.8 |        | 1130.6 | P   | 682.5  | 341.7 | 665.4  |        | 6  |
| 12 | 1247.7 | 624.4 |        | 1229.7 | V   | 585.4  |       | 568.4  |        | 5  |
| 13 | 1346.8 | 673.9 |        | 1328.8 | V   | 486.3  |       | 469.3  |        | 4  |
| 14 | 1459.9 | 730.4 |        | 1441.8 | L   | 387.3  |       | 370.3  |        | 3  |
| 15 | 1558.9 | 780.0 |        | 1540.9 | V   | 274.2  |       | 257.2  |        | 2  |
| 16 | 1733.0 | 867.0 | 1716.0 | 1715.0 | R   | 175.1  |       | 158.1  |        | 1  |

Gene symbol: Tmem14c

Protein name: Transmembrane protein 14C

Protein accession numbers: IPI00132768

Peptide sequence: (K)VGISLLSPPHP

Exclusive (unique to this protein): TRUE

SEQUEST XCorr score: 2.22 SEQUEST DCn score: 0.487

Fix modifications: None

Variable modifications: None

charge: 2

Observed m/z: 553.8102

Actual minus calculated peptide mass (AMU): -0.0085453

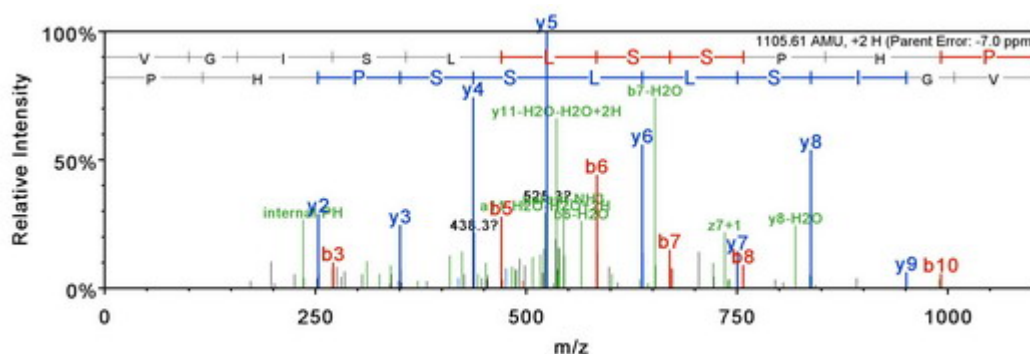

| B  | B ions | B+2H  | B-NH3 | B-H2O  | A,A | Y ions | Y+2H  | Y-NH3 | Y-H2O  | Y  |
|----|--------|-------|-------|--------|-----|--------|-------|-------|--------|----|
| 1  | 100.1  |       |       |        | V   | 1106.6 | 553.8 |       | 1088.6 | 11 |
| 2  | 157.1  |       |       |        | G   | 1007.6 | 504.3 |       | 989.5  | 10 |
| 3  | 270.2  |       |       |        | I   | 950.5  | 475.8 |       | 932.5  | 9  |
| 4  | 357.2  |       |       | 339.2  | S   | 837.5  | 419.2 |       | 819.4  | 8  |
| 5  | 470.3  |       |       | 452.3  | L   | 750.4  | 375.7 |       | 732.4  | 7  |
| 6  | 583.4  | 292.2 |       | 565.4  | L   | 637.3  | 319.2 |       | 619.3  | 6  |
| 7  | 670.4  | 335.7 |       | 652.4  | S   | 524.3  |       |       | 506.2  | 5  |
| 8  | 757.5  | 379.2 |       | 739.4  | S   | 437.2  |       |       | 419.2  | 4  |
| 9  | 854.5  | 427.8 |       | 836.5  | P   | 350.2  |       |       |        | 3  |
| 10 | 991.6  | 496.3 |       | 973.6  | H   | 253.1  |       |       |        | 2  |
| 11 | 1106.6 | 553.8 |       | 1088.6 | P   | 116.1  |       |       |        | 1  |

Gene symbol: Tmem66

Protein name: transmembrane protein 66

Protein accession numbers: IPI00469002

Peptide sequence: (K)TVVSCGYESSL(G)

Exclusive (unique to this protein): TRUE

SEQUEST XCorr score: 2.2 SEQUEST DCn score: 0.545

Fix modifications: C5: Carbamidomethyl (+57.02) Variable modifications: None

charge: 2

Observed m/z: 1060.9805

Actual minus calculated peptide mass (AMU): 0.008789

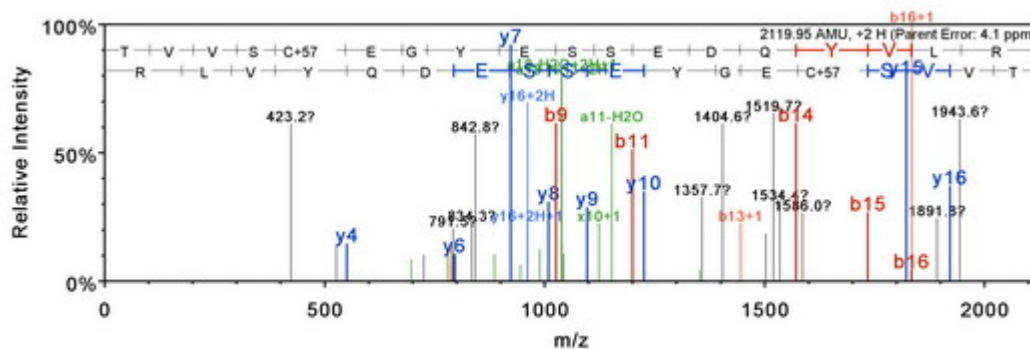

| B  | B Ions | B+2H   | B-NH3  | B-H2O  | AA   | Y Ions | Y+2H   | Y-NH3  | Y-H2O  | Y  |
|----|--------|--------|--------|--------|------|--------|--------|--------|--------|----|
| 1  | 102.1  |        |        | 84.0   | T    | 2120.9 | 1061.0 | 2103.9 | 2102.9 | 18 |
| 2  | 201.1  |        |        | 183.1  | V    | 2019.9 | 1010.5 | 2002.9 | 2001.9 | 17 |
| 3  | 300.2  |        |        | 282.2  | V    | 1920.8 | 960.9  | 1903.8 | 1902.8 | 16 |
| 4  | 387.2  |        |        | 369.2  | S    | 1821.8 | 911.4  | 1804.7 | 1803.8 | 15 |
| 5  | 547.3  |        |        | 529.2  | C+57 | 1734.7 | 867.9  | 1717.7 | 1716.7 | 14 |
| 6  | 676.3  | 338.7  |        | 658.3  | E    | 1574.7 | 787.9  | 1557.7 | 1556.7 | 13 |
| 7  | 733.3  | 367.2  |        | 715.3  | G    | 1445.7 | 723.3  | 1428.6 | 1427.6 | 12 |
| 8  | 896.4  | 448.7  |        | 878.4  | Y    | 1388.6 | 694.8  | 1371.6 | 1370.6 | 11 |
| 9  | 1025.4 | 513.2  |        | 1007.4 | E    | 1225.6 | 613.3  | 1208.5 | 1207.6 | 10 |
| 10 | 1112.5 | 556.7  |        | 1094.5 | S    | 1096.5 | 548.8  | 1079.5 | 1078.5 | 9  |
| 11 | 1199.5 | 600.3  |        | 1181.5 | S    | 1009.5 | 505.3  | 992.5  | 991.5  | 8  |
| 12 | 1328.5 | 664.8  |        | 1310.5 | E    | 922.5  | 461.7  | 905.4  | 904.5  | 7  |
| 13 | 1443.6 | 722.3  |        | 1425.5 | D    | 793.4  | 397.2  | 776.4  | 775.4  | 6  |
| 14 | 1571.6 | 786.3  | 1554.6 | 1553.6 | Q    | 678.4  |        | 661.4  |        | 5  |
| 15 | 1734.7 | 867.8  | 1717.7 | 1716.7 | Y    | 550.3  |        | 533.3  |        | 4  |
| 16 | 1833.8 | 917.4  | 1816.7 | 1815.7 | V    | 387.3  |        | 370.3  |        | 3  |
| 17 | 1946.8 | 973.9  | 1929.8 | 1928.8 | L    | 288.2  |        | 271.2  |        | 2  |
| 18 | 2120.9 | 1061.0 | 2103.9 | 2102.9 | R    | 175.1  |        | 158.1  |        | 1  |

Gene symbol: Tom111

Protein name: Isoform 1 of TOM1-like protein 1

Protein accession numbers: IPI00124710,IPI00230596,IPI00649476

Peptide sequence: (K)MNVKVMTAILMENTPGSENHEDIELLR(K)

Exclusive (unique to this protein): TRUE

SEQUEST XCorr score: 2.59 SEQUEST DCn score: 0.348

Fix modifications: None

Variable modifications: M1: Oxidation (+16.00), M6: Oxidation (+16.00)

charge: 3 Observed m/z: 1039.5105

Actual minus calculated peptide mass (AMU): 0.0092755

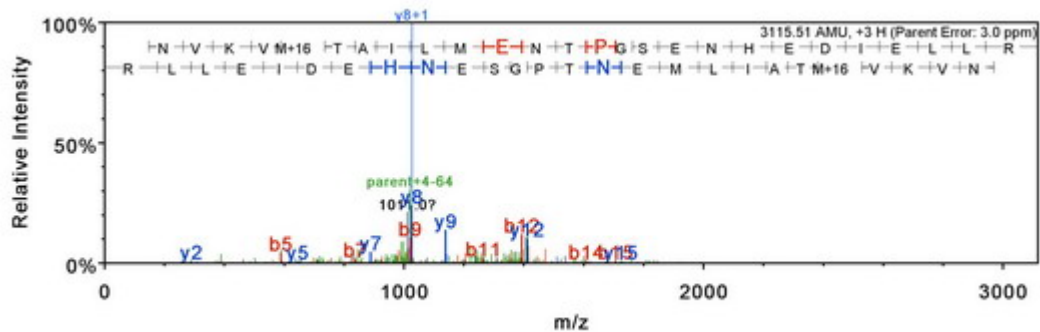

| B  | B Ions | B+2H   | B-NH3  | B-H2O  | AA   | Y Ions | Y+2H   | Y-NH3  | Y-H2O  | Y  |
|----|--------|--------|--------|--------|------|--------|--------|--------|--------|----|
| 1  | 148.0  |        |        |        | M+16 | 3116.5 | 1558.8 | 3099.5 | 3098.5 | 27 |
| 2  | 262.1  |        | 245.1  |        | N    | 2969.5 | 1485.2 | 2952.4 | 2951.5 | 26 |
| 3  | 361.2  |        | 344.1  |        | V    | 2855.4 | 1428.2 | 2838.4 | 2837.4 | 25 |
| 4  | 489.3  | 245.1  | 472.2  |        | K    | 2756.4 | 1378.7 | 2739.3 | 2738.3 | 24 |
| 5  | 588.3  | 294.7  | 571.3  |        | V    | 2628.3 | 1314.6 | 2611.2 | 2610.3 | 23 |
| 6  | 735.4  | 368.2  | 718.3  |        | M+16 | 2529.2 | 1265.1 | 2512.2 | 2511.2 | 22 |
| 7  | 836.4  | 418.7  | 819.4  | 818.4  | T    | 2382.2 | 1191.6 | 2365.1 | 2364.2 | 21 |
| 8  | 907.4  | 454.2  | 890.4  | 889.4  | A    | 2281.1 | 1141.1 | 2264.1 | 2263.1 | 20 |
| 9  | 1020.5 | 510.8  | 1003.5 | 1002.5 | I    | 2210.1 | 1105.5 | 2193.1 | 2192.1 | 19 |
| 10 | 1133.6 | 567.3  | 1116.6 | 1115.6 | L    | 2097.0 | 1049.0 | 2080.0 | 2079.0 | 18 |
| 11 | 1264.7 | 632.8  | 1247.6 | 1246.6 | M    | 1983.9 | 992.5  | 1966.9 | 1965.9 | 17 |
| 12 | 1393.7 | 697.4  | 1376.7 | 1375.7 | E    | 1852.9 | 926.9  | 1835.8 | 1834.9 | 16 |
| 13 | 1507.7 | 754.4  | 1490.7 | 1489.7 | N    | 1723.8 | 862.4  | 1706.8 | 1705.8 | 15 |
| 14 | 1608.8 | 804.9  | 1591.8 | 1590.8 | T    | 1609.8 | 805.4  | 1592.8 | 1591.8 | 14 |
| 15 | 1705.8 | 853.4  | 1688.8 | 1687.8 | P    | 1508.7 | 754.9  | 1491.7 | 1490.7 | 13 |
| 16 | 1762.9 | 881.9  | 1745.8 | 1744.8 | G    | 1411.7 | 706.3  | 1394.7 | 1393.7 | 12 |
| 17 | 1849.9 | 925.5  | 1832.9 | 1831.9 | S    | 1354.7 | 677.8  | 1337.6 | 1336.7 | 11 |
| 18 | 1978.9 | 990.0  | 1961.9 | 1960.9 | E    | 1267.6 | 634.3  | 1250.6 | 1249.6 | 10 |
| 19 | 2093.0 | 1047.0 | 2075.9 | 2075.0 | N    | 1138.6 | 569.8  | 1121.6 | 1120.6 | 9  |
| 20 | 2230.0 | 1115.5 | 2213.0 | 2212.0 | H    | 1024.5 | 512.8  | 1007.5 | 1006.5 | 8  |
| 21 | 2359.1 | 1180.0 | 2342.1 | 2341.1 | E    | 887.5  | 444.3  | 870.5  | 869.5  | 7  |
| 22 | 2474.1 | 1237.5 | 2457.1 | 2456.1 | D    | 758.4  | 379.7  | 741.4  | 740.4  | 6  |
| 23 | 2587.2 | 1294.1 | 2570.2 | 2569.2 | I    | 643.4  |        | 626.4  | 625.4  | 5  |
| 24 | 2716.2 | 1358.6 | 2699.2 | 2698.2 | E    | 530.3  |        | 513.3  | 512.3  | 4  |
| 25 | 2829.3 | 1415.2 | 2812.3 | 2811.3 | L    | 401.3  |        | 384.3  |        | 3  |
| 26 | 2942.4 | 1471.7 | 2925.4 | 2924.4 | L    | 288.2  |        | 271.2  |        | 2  |
| 27 | 3116.5 | 1558.8 | 3099.5 | 3098.5 | R    | 175.1  |        | 158.1  |        | 1  |

Gene symbol: Tpd52

Protein name: Tumor protein D52

Protein accession numbers: IPI00408626,IPI00473743,IPI00622606,IPI00622833,IPI00625441

Peptide sequence: (K)ASAAFSSVGSVITK(K)

Exclusive (unique to this protein): TRUE

SEQUEST XCorr score: 2.55 SEQUEST DCn score: 0.551

Fix modifications: None

Variable modifications: None

charge: 2

Observed m/z: 662.8588

Actual minus calculated peptide mass (AMU): -0.001465

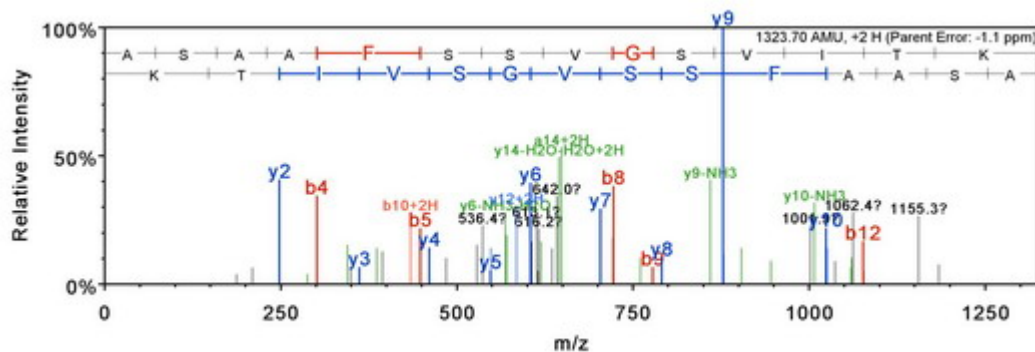

| B  | B Ions | B+2H  | B-NH3  | B-H2O  | A,A | Y Ions | Y+2H  | Y-NH3  | Y-H2O  | Y  |
|----|--------|-------|--------|--------|-----|--------|-------|--------|--------|----|
| 1  | 72.0   |       |        |        | A   | 1324.7 | 662.9 | 1307.7 | 1306.7 | 14 |
| 2  | 159.1  |       |        | 141.1  | S   | 1253.7 | 627.3 | 1236.7 | 1235.7 | 13 |
| 3  | 230.1  |       |        | 212.1  | A   | 1166.6 | 583.8 | 1149.6 | 1148.6 | 12 |
| 4  | 301.2  |       |        | 283.1  | A   | 1095.6 | 548.3 | 1078.6 | 1077.6 | 11 |
| 5  | 448.2  |       |        | 430.2  | F   | 1024.6 | 512.8 | 1007.5 | 1006.6 | 10 |
| 6  | 535.3  | 268.1 |        | 517.2  | S   | 877.5  | 439.3 | 860.5  | 859.5  | 9  |
| 7  | 622.3  | 311.7 |        | 604.3  | S   | 790.5  | 395.7 | 773.4  | 772.5  | 8  |
| 8  | 721.4  | 361.2 |        | 703.3  | V   | 703.4  | 352.2 | 686.4  | 685.4  | 7  |
| 9  | 778.4  | 389.7 |        | 760.4  | G   | 604.4  | 302.7 | 587.3  | 586.4  | 6  |
| 10 | 865.4  | 433.2 |        | 847.4  | S   | 547.4  |       | 530.3  | 529.3  | 5  |
| 11 | 964.5  | 482.7 |        | 946.5  | V   | 460.3  |       | 443.3  | 442.3  | 4  |
| 12 | 1077.6 | 539.3 |        | 1059.5 | I   | 361.3  |       | 344.2  | 343.2  | 3  |
| 13 | 1178.6 | 589.8 |        | 1160.6 | T   | 248.2  |       | 231.1  | 230.2  | 2  |
| 14 | 1324.7 | 662.9 | 1307.7 | 1306.7 | K   | 147.1  |       | 130.1  |        | 1  |

Gene symbol: Tpi1

Protein name: Triosephosphate isomerase

Protein accession numbers: IPI00467833

Peptide sequence: (K)DLGATWVVLGHSER(R)

Exclusive (unique to this protein): TRUE

SEQUEST XCorr score: 2.6 SEQUEST DCn score: 0.731

Fix modifications: None

Variable modifications: None

charge: 2

Observed m/z: 770.3953

Actual minus calculated peptide mass (AMU): -0.009399

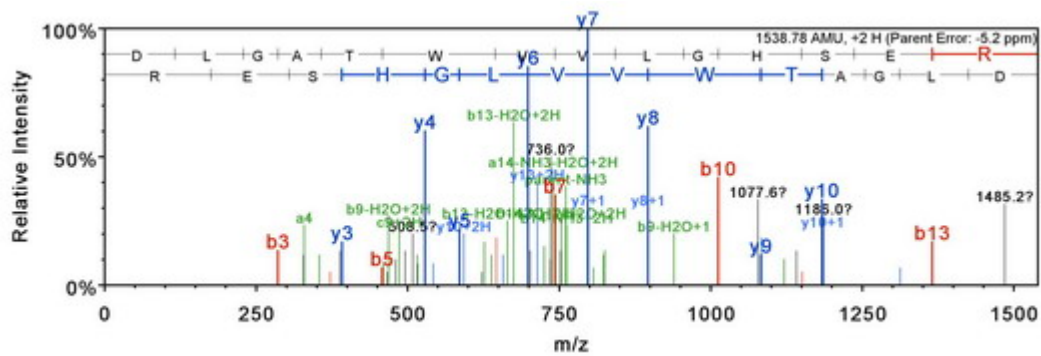

| B  | B Ions | B+2H  | B-NH3  | B-H2O  | A,A | Y Ions | Y+2H  | Y-NH3  | Y-H2O  | Y  |
|----|--------|-------|--------|--------|-----|--------|-------|--------|--------|----|
| 1  | 116.0  |       |        | 98.0   | D   | 1539.8 | 770.4 | 1522.8 | 1521.8 | 14 |
| 2  | 229.1  |       |        | 211.1  | L   | 1424.8 | 712.9 | 1407.7 | 1406.8 | 13 |
| 3  | 286.1  |       |        | 268.1  | G   | 1311.7 | 656.3 | 1294.7 | 1293.7 | 12 |
| 4  | 357.2  |       |        | 339.2  | A   | 1254.7 | 627.8 | 1237.6 | 1236.7 | 11 |
| 5  | 458.2  |       |        | 440.2  | T   | 1183.6 | 592.3 | 1166.6 | 1165.6 | 10 |
| 6  | 644.3  | 322.7 |        | 626.3  | W   | 1082.6 | 541.8 | 1065.5 | 1064.6 | 9  |
| 7  | 743.4  | 372.2 |        | 725.4  | V   | 896.5  | 448.8 | 879.5  | 878.5  | 8  |
| 8  | 842.4  | 421.7 |        | 824.4  | V   | 797.4  | 399.2 | 780.4  | 779.4  | 7  |
| 9  | 955.5  | 478.3 |        | 937.5  | L   | 698.4  | 349.7 | 681.3  | 680.4  | 6  |
| 10 | 1012.6 | 506.8 |        | 994.5  | G   | 585.3  | 293.1 | 568.3  | 567.3  | 5  |
| 11 | 1149.6 | 575.3 |        | 1131.6 | H   | 528.3  | 264.6 | 511.2  | 510.2  | 4  |
| 12 | 1236.6 | 618.8 |        | 1218.6 | S   | 391.2  |       | 374.2  | 373.2  | 3  |
| 13 | 1365.7 | 683.3 |        | 1347.7 | E   | 304.2  |       | 287.1  | 286.2  | 2  |
| 14 | 1539.8 | 770.4 | 1522.8 | 1521.8 | R   | 175.1  |       | 158.1  |        | 1  |

Gene symbol: Tsfm

Protein name: Elongation factor Ts, mitochondrial precursor

Protein accession numbers: IPI00113052

Peptide sequence: (K)GFLNSSELSLAAGPDR(E)

Exclusive (unique to this protein): TRUE

SEQUEST XCorr score: 2.4 SEQUEST DCn score: 0.577

Fix modifications: None

Variable modifications: None

charge: 2 Observed m/z: 881.9363

Actual minus calculated peptide mass (AMU): 0.0035358

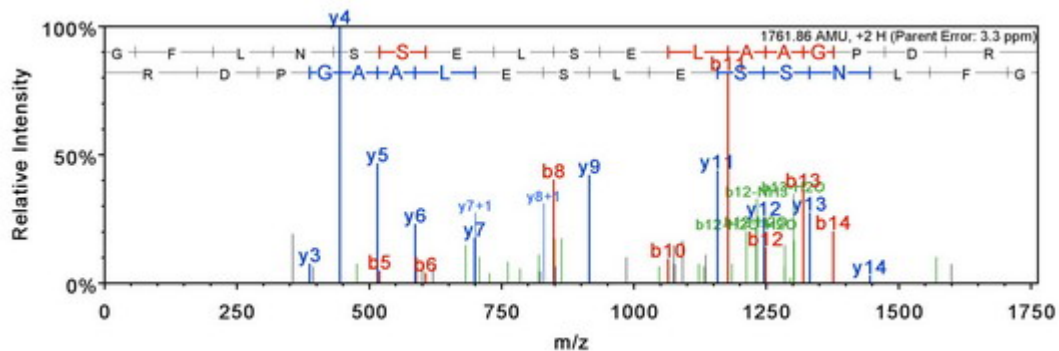

| B  | B ions | B+2H  | B-NH3  | B-H2O  | AA | Y ions | Y+2H  | Y-NH3  | Y-H2O  | Y  |
|----|--------|-------|--------|--------|----|--------|-------|--------|--------|----|
| 1  | 58.0   |       |        |        | G  | 1762.9 | 881.9 | 1745.8 | 1744.9 | 17 |
| 2  | 205.1  |       |        |        | F  | 1705.8 | 853.4 | 1688.8 | 1687.8 | 16 |
| 3  | 318.2  |       |        |        | L  | 1558.8 | 779.9 | 1541.7 | 1540.8 | 15 |
| 4  | 432.2  |       | 415.2  |        | N  | 1445.7 | 723.4 | 1428.7 | 1427.7 | 14 |
| 5  | 519.3  |       | 502.2  | 501.3  | S  | 1331.6 | 666.3 | 1314.6 | 1313.6 | 13 |
| 6  | 606.3  | 303.7 | 589.3  | 588.3  | S  | 1244.6 | 622.8 | 1227.6 | 1226.6 | 12 |
| 7  | 735.3  | 368.2 | 718.3  | 717.3  | E  | 1157.6 | 579.3 | 1140.5 | 1139.6 | 11 |
| 8  | 848.4  | 424.7 | 831.4  | 830.4  | L  | 1028.5 | 514.8 | 1011.5 | 1010.5 | 10 |
| 9  | 935.5  | 468.2 | 918.4  | 917.4  | S  | 915.5  | 458.2 | 898.4  | 897.4  | 9  |
| 10 | 1064.5 | 532.8 | 1047.5 | 1046.5 | E  | 828.4  | 414.7 | 811.4  | 810.4  | 8  |
| 11 | 1177.6 | 589.3 | 1160.5 | 1159.6 | L  | 699.4  | 350.2 | 682.4  | 681.4  | 7  |
| 12 | 1248.6 | 624.8 | 1231.6 | 1230.6 | A  | 586.3  | 293.7 | 569.3  | 568.3  | 6  |
| 13 | 1319.7 | 660.3 | 1302.6 | 1301.6 | A  | 515.3  |       | 498.2  | 497.3  | 5  |
| 14 | 1376.7 | 688.8 | 1359.6 | 1358.7 | G  | 444.2  |       | 427.2  | 426.2  | 4  |
| 15 | 1473.7 | 737.4 | 1456.7 | 1455.7 | P  | 387.2  |       | 370.2  | 369.2  | 3  |
| 16 | 1588.8 | 794.9 | 1571.7 | 1570.7 | D  | 290.2  |       | 273.1  | 272.1  | 2  |
| 17 | 1762.9 | 881.9 | 1745.8 | 1744.9 | R  | 175.1  |       | 158.1  |        | 1  |

Gene symbol: Tufm

Protein name: Isoform 1 of Elongation factor Tu, mitochondrial precursor

Protein accession numbers: IPI00274407,IPI00460132,IPI00625588

Peptide sequence: (K)LLDAVDITYIPVPT(R)

Exclusive (unique to this protein): TRUE

SEQUEST XCorr score: 2.23 SEQUEST DCn score: 0.45

Fix modifications: None

Variable modifications: None

charge: 2

Observed m/z: 786.9321

Actual minus calculated peptide mass (AMU): -0.00769

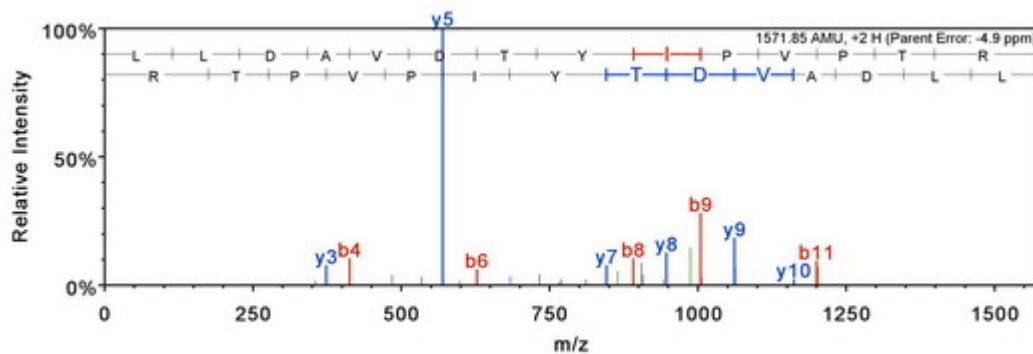

| B  | B ions | B+2H  | B-NH3  | B-H2O  | AA | Y ions | Y+2H  | Y-NH3  | Y-H2O  | Y  |
|----|--------|-------|--------|--------|----|--------|-------|--------|--------|----|
| 1  | 114.1  |       |        |        | L  | 1572.9 | 786.9 | 1555.8 | 1554.9 | 14 |
| 2  | 227.2  |       |        |        | L  | 1459.8 | 730.4 | 1442.8 | 1441.8 | 13 |
| 3  | 342.2  |       |        | 324.2  | D  | 1346.7 | 673.9 | 1329.7 | 1328.7 | 12 |
| 4  | 413.2  |       |        | 395.2  | A  | 1231.7 | 616.3 | 1214.6 | 1213.7 | 11 |
| 5  | 512.3  |       |        | 494.3  | V  | 1160.6 | 580.8 | 1143.6 | 1142.6 | 10 |
| 6  | 627.3  | 314.2 |        | 609.3  | D  | 1061.6 | 531.3 | 1044.5 | 1043.5 | 9  |
| 7  | 728.4  | 364.7 |        | 710.4  | T  | 946.5  | 473.8 | 929.5  | 928.5  | 8  |
| 8  | 891.5  | 446.2 |        | 873.4  | Y  | 845.5  | 423.3 | 828.5  | 827.5  | 7  |
| 9  | 1004.5 | 502.8 |        | 986.5  | I  | 682.4  | 341.7 | 665.4  | 664.4  | 6  |
| 10 | 1101.6 | 551.3 |        | 1083.6 | P  | 569.3  |       | 552.3  | 551.3  | 5  |
| 11 | 1200.7 | 600.8 |        | 1182.6 | V  | 472.3  |       | 455.3  | 454.3  | 4  |
| 12 | 1297.7 | 649.4 |        | 1279.7 | P  | 373.2  |       | 356.2  | 355.2  | 3  |
| 13 | 1398.8 | 699.9 |        | 1380.7 | T  | 276.2  |       | 259.1  | 258.2  | 2  |
| 14 | 1572.9 | 786.9 | 1555.8 | 1554.9 | R  | 175.1  |       | 158.1  |        | 1  |

Gene symbol: Txndc5

Protein name: Thioredoxin domain-containing protein 5 precursor

Protein accession numbers: IPI00163011

Peptide sequence: (R)DLDSLHSFVLR(Q)

Exclusive (unique to this protein): TRUE

SEQUEST XCorr score: 2.02 SEQUEST DCn score: 0.608

Fix modifications: None

Variable modifications: None

charge: 2

Observed m/z: 651.3428

Actual minus calculated peptide mass (AMU): -0.00769

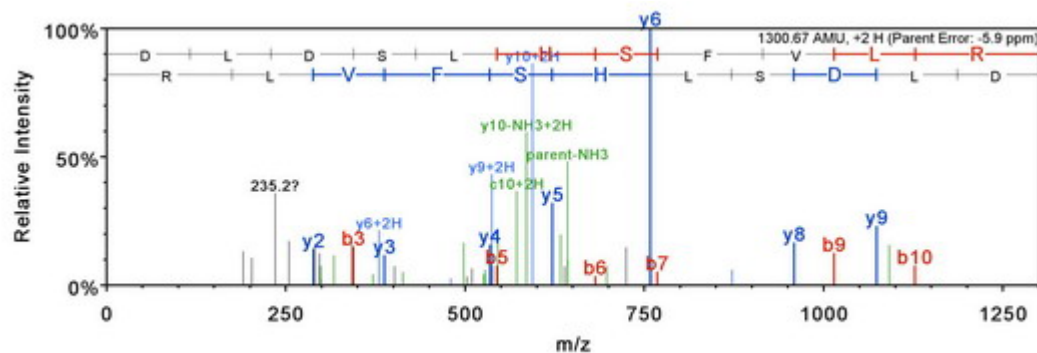

| B  | B ions | B+2H  | B-NH3  | B-H2O  | AA | Y ions | Y+2H  | Y-NH3  | Y-H2O  | Y  |
|----|--------|-------|--------|--------|----|--------|-------|--------|--------|----|
| 1  | 116.0  |       |        | 98.0   | D  | 1301.7 | 651.4 | 1284.7 | 1283.7 | 11 |
| 2  | 229.1  |       |        | 211.1  | L  | 1186.7 | 593.8 | 1169.6 | 1168.7 | 10 |
| 3  | 344.2  |       |        | 326.1  | D  | 1073.6 | 537.3 | 1056.5 | 1055.6 | 9  |
| 4  | 431.2  |       |        | 413.2  | S  | 958.6  | 479.8 | 941.5  | 940.5  | 8  |
| 5  | 544.3  |       |        | 526.3  | L  | 871.5  | 436.3 | 854.5  | 853.5  | 7  |
| 6  | 681.3  | 341.2 |        | 663.3  | H  | 758.4  | 379.7 | 741.4  | 740.4  | 6  |
| 7  | 768.4  | 384.7 |        | 750.3  | S  | 621.4  |       | 604.4  | 603.4  | 5  |
| 8  | 915.4  | 458.2 |        | 897.4  | F  | 534.3  |       | 517.3  |        | 4  |
| 9  | 1014.5 | 507.8 |        | 996.5  | V  | 387.3  |       | 370.3  |        | 3  |
| 10 | 1127.6 | 564.3 |        | 1109.6 | L  | 288.2  |       | 271.2  |        | 2  |
| 11 | 1301.7 | 651.4 | 1284.7 | 1283.7 | R  | 175.1  |       | 158.1  |        | 1  |



Gene symbol: Txn12  
 Protein name: Thioredoxin-like protein 2  
 Protein accession numbers: IPI00315550  
 Peptide sequence: (R)GDLVGGLDIVK(E)  
 Exclusive (unique to this protein): TRUE  
 SEQUEST XCorr score: 2.18 SEQUEST DCn score: 0.307  
 Fix modifications: None  
 Variable modifications: None  
 charge: 2 Observed m/z: 543.3113  
 Actual minus calculated peptide mass (AMU): -0.006226

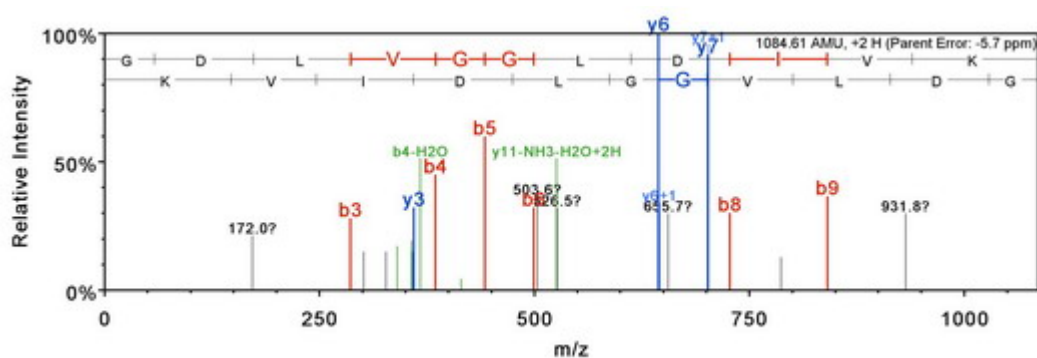

| B  | B ions | B+2H  | B-NH3  | B-H2O  | AA | Y ions | Y+2H  | Y-NH3  | Y-H2O  | Y  |
|----|--------|-------|--------|--------|----|--------|-------|--------|--------|----|
| 1  | 58.0   |       |        |        | G  | 1085.6 | 543.3 | 1068.6 | 1067.6 | 11 |
| 2  | 173.1  |       |        | 155.1  | D  | 1028.6 | 514.8 | 1011.6 | 1010.6 | 10 |
| 3  | 286.1  |       |        | 268.1  | L  | 913.6  | 457.3 | 896.6  | 895.6  | 9  |
| 4  | 385.2  |       |        | 367.2  | V  | 800.5  | 400.8 | 783.5  | 782.5  | 8  |
| 5  | 442.2  |       |        | 424.2  | G  | 701.4  | 351.2 | 684.4  | 683.4  | 7  |
| 6  | 499.3  | 250.1 |        | 481.2  | G  | 644.4  | 322.7 | 627.4  | 626.4  | 6  |
| 7  | 612.3  | 306.7 |        | 594.3  | L  | 587.4  |       | 570.4  | 569.4  | 5  |
| 8  | 727.4  | 364.2 |        | 709.4  | D  | 474.3  |       | 457.3  | 456.3  | 4  |
| 9  | 840.5  | 420.7 |        | 822.4  | I  | 359.3  |       | 342.2  |        | 3  |
| 10 | 939.5  | 470.3 |        | 921.5  | V  | 246.2  |       | 229.2  |        | 2  |
| 11 | 1085.6 | 543.3 | 1068.6 | 1067.6 | K  | 147.1  |       | 130.1  |        | 1  |

Gene symbol: Ube112  
 Protein name: Ubiquitin-activating enzyme E1-like protein 2  
 Protein accession numbers: IPI00226815  
 Peptide sequence: (K)ALQLLHCFPLETR(L)  
 Exclusive (unique to this protein): TRUE  
 SEQUEST XCorr score: 2.3 SEQUEST DCn score: 0.652  
 Fix modifications: C7: Carbamidomethyl (+57.02) Variable modifications: None  
 charge: 2 Observed m/z: 799.4271  
 Actual minus calculated peptide mass (AMU): -0.0063456

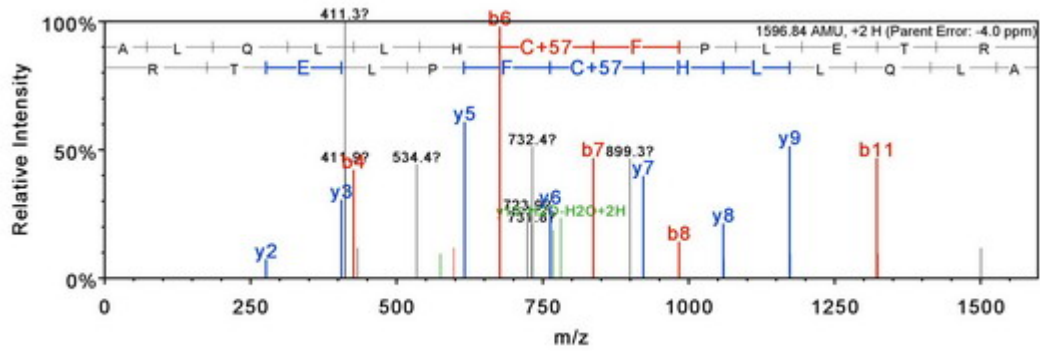

| B  | B Ions | B+2H  | B-NH <sub>3</sub> | B-H <sub>2</sub> O | A,A  | Y Ions | Y+2H  | Y-NH <sub>3</sub> | Y-H <sub>2</sub> O | Y  |
|----|--------|-------|-------------------|--------------------|------|--------|-------|-------------------|--------------------|----|
| 1  | 72.0   |       |                   |                    | A    | 1597.9 | 799.4 | 1580.8            | 1579.8             | 13 |
| 2  | 185.1  |       |                   |                    | L    | 1526.8 | 763.9 | 1509.8            | 1508.8             | 12 |
| 3  | 313.2  |       | 296.2             |                    | Q    | 1413.7 | 707.4 | 1396.7            | 1395.7             | 11 |
| 4  | 426.3  |       | 409.3             |                    | L    | 1285.7 | 643.3 | 1268.7            | 1267.7             | 10 |
| 5  | 539.4  |       | 522.3             |                    | L    | 1172.6 | 586.8 | 1155.6            | 1154.6             | 9  |
| 6  | 676.4  | 338.7 | 659.4             |                    | H    | 1059.5 | 530.3 | 1042.5            | 1041.5             | 8  |
| 7  | 836.5  | 418.7 | 819.4             |                    | C+57 | 922.5  | 461.7 | 905.4             | 904.4              | 7  |
| 8  | 983.5  | 492.3 | 966.5             |                    | F    | 762.4  | 381.7 | 745.4             | 744.4              | 6  |
| 9  | 1080.6 | 540.8 | 1063.5            |                    | P    | 615.4  |       | 598.3             | 597.3              | 5  |
| 10 | 1193.7 | 597.3 | 1176.6            |                    | L    | 518.3  |       | 501.3             | 500.3              | 4  |
| 11 | 1322.7 | 661.9 | 1305.7            | 1304.7             | E    | 405.2  |       | 388.2             | 387.2              | 3  |
| 12 | 1423.7 | 712.4 | 1406.7            | 1405.7             | T    | 276.2  |       | 259.1             | 258.2              | 2  |
| 13 | 1597.9 | 799.4 | 1580.8            | 1579.8             | R    | 175.1  |       | 158.1             |                    | 1  |

Gene symbol: Ube2g1

Protein name: Ubiquitin-conjugating enzyme E2 G1

Protein accession numbers: IPI00310850

Peptide sequence: (K)NPVEGFSAAGLDDNDLYR(W)

Exclusive (unique to this protein): TRUE

SEQUEST XCorr score: 2.3 SEQUEST DCn score: 0.581

Fix modifications: None

Variable modifications: None

charge: 2 Observed m/z: 997.973

Actual minus calculated peptide mass (AMU): -0.007935

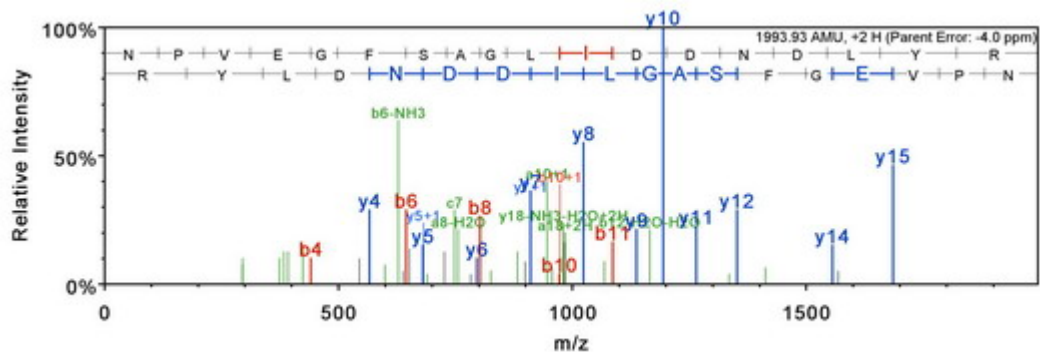

| B  | B Ions | B+2H  | B-NH3  | B-H2O  | AA | Y Ions | Y+2H  | Y-NH3  | Y-H2O  | Y  |
|----|--------|-------|--------|--------|----|--------|-------|--------|--------|----|
| 1  | 115.1  |       | 98.0   |        | N  | 1995.0 | 998.0 | 1977.9 | 1976.9 | 18 |
| 2  | 212.1  |       | 195.1  |        | P  | 1880.9 | 941.0 | 1863.9 | 1862.9 | 17 |
| 3  | 311.2  |       | 294.2  |        | V  | 1783.9 | 892.4 | 1766.8 | 1765.8 | 16 |
| 4  | 440.2  |       | 423.2  | 422.2  | E  | 1684.8 | 842.9 | 1667.8 | 1666.8 | 15 |
| 5  | 497.2  |       | 480.2  | 479.2  | G  | 1555.7 | 778.4 | 1538.7 | 1537.7 | 14 |
| 6  | 644.3  | 322.7 | 627.3  | 626.3  | F  | 1498.7 | 749.9 | 1481.7 | 1480.7 | 13 |
| 7  | 731.3  | 366.2 | 714.3  | 713.3  | S  | 1351.7 | 676.3 | 1334.6 | 1333.6 | 12 |
| 8  | 802.4  | 401.7 | 785.4  | 784.4  | A  | 1264.6 | 632.8 | 1247.6 | 1246.6 | 11 |
| 9  | 859.4  | 430.2 | 842.4  | 841.4  | G  | 1193.6 | 597.3 | 1176.5 | 1175.6 | 10 |
| 10 | 972.5  | 486.7 | 955.5  | 954.5  | L  | 1136.6 | 568.8 | 1119.5 | 1118.5 | 9  |
| 11 | 1085.6 | 543.3 | 1068.5 | 1067.5 | I  | 1023.5 | 512.2 | 1006.5 | 1005.5 | 8  |
| 12 | 1200.6 | 600.8 | 1183.6 | 1182.6 | D  | 910.4  | 455.7 | 893.4  | 892.4  | 7  |
| 13 | 1315.6 | 658.3 | 1298.6 | 1297.6 | D  | 795.4  | 398.2 | 778.3  | 777.4  | 6  |
| 14 | 1429.7 | 715.3 | 1412.6 | 1411.7 | N  | 680.3  |       | 663.3  | 662.3  | 5  |
| 15 | 1544.7 | 772.9 | 1527.7 | 1526.7 | D  | 566.3  |       | 549.3  | 548.3  | 4  |
| 16 | 1657.8 | 829.4 | 1640.7 | 1639.8 | L  | 451.3  |       | 434.2  |        | 3  |
| 17 | 1820.8 | 910.9 | 1803.8 | 1802.8 | Y  | 338.2  |       | 321.2  |        | 2  |
| 18 | 1995.0 | 998.0 | 1977.9 | 1976.9 | R  | 175.1  |       | 158.1  |        | 1  |

Gene symbol: Ube2n

Protein name: Ubiquitin-conjugating enzyme E2 N

Protein accession numbers: IPI00165854,IPI00850217

Peptide sequence: (R)LLAEPVPGIK(A)

Exclusive (unique to this protein): TRUE

SEQUEST XCorr score: 2.08 SEQUEST DCn score: 0.944

Fix modifications: None

Variable modifications: None

charge: 2

Observed m/z: 518.824

Actual minus calculated peptide mass (AMU): -0.0008545

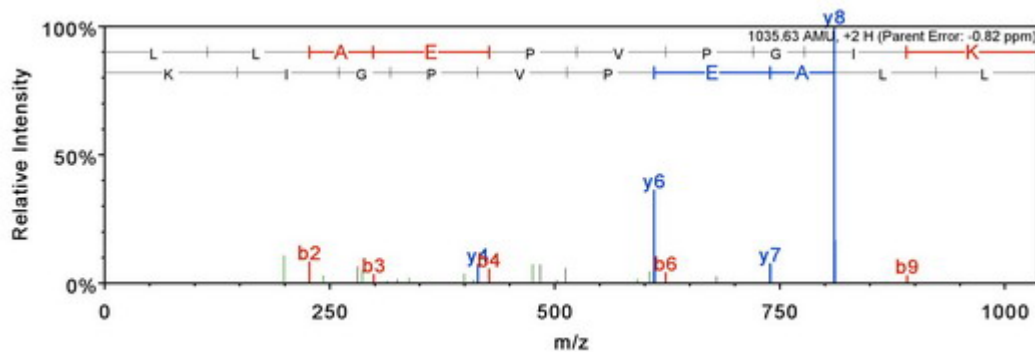

| B  | B ions | B+2H  | B-NH3  | B-H2O  | A,A | Y ions | Y+2H  | Y-NH3  | Y-H2O  | Y  |
|----|--------|-------|--------|--------|-----|--------|-------|--------|--------|----|
| 1  | 114.1  |       |        |        | L   | 1036.6 | 518.8 | 1019.6 | 1018.6 | 10 |
| 2  | 227.2  |       |        |        | L   | 923.6  | 462.3 | 906.5  | 905.6  | 9  |
| 3  | 298.2  |       |        |        | A   | 810.5  | 405.7 | 793.5  | 792.5  | 8  |
| 4  | 427.3  |       |        | 409.3  | E   | 739.4  | 370.2 | 722.4  | 721.4  | 7  |
| 5  | 524.3  |       |        | 506.3  | P   | 610.4  | 305.7 | 593.4  |        | 6  |
| 6  | 623.4  | 312.2 |        | 605.4  | V   | 513.3  |       | 496.3  |        | 5  |
| 7  | 720.4  | 360.7 |        | 702.4  | P   | 414.3  |       | 397.3  |        | 4  |
| 8  | 777.5  | 389.2 |        | 759.4  | G   | 317.2  |       | 300.2  |        | 3  |
| 9  | 890.5  | 445.8 |        | 872.5  | I   | 260.2  |       | 243.2  |        | 2  |
| 10 | 1036.6 | 518.8 | 1019.6 | 1018.6 | K   | 147.1  |       | 130.1  |        | 1  |

Gene symbol: Ube2s

Protein name: Ubiquitin-conjugating enzyme E2 S

Protein accession numbers: IPI00121891

Peptide sequence: (R)DWTAELGIR(H)

Exclusive (unique to this protein): TRUE

SEQUEST XCorr score: 2.08 SEQUEST DCn score: 0.405

Fix modifications: None

Variable modifications: None

charge: 2

Observed m/z: 530.7747

Actual minus calculated peptide mass (AMU): -0.001465

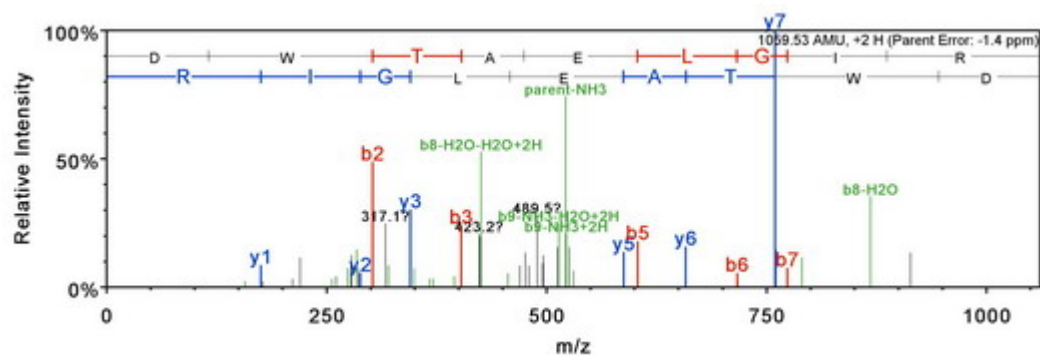

| B | B ions | B+2H  | B-NH3  | B-H2O  | A,A | Y ions | Y+2H  | Y-NH3  | Y-H2O  | Y |
|---|--------|-------|--------|--------|-----|--------|-------|--------|--------|---|
| 1 | 116.0  |       |        | 98.0   | D   | 1060.5 | 530.8 | 1043.5 | 1042.5 | 9 |
| 2 | 302.1  |       |        | 284.1  | W   | 945.5  | 473.3 | 928.5  | 927.5  | 8 |
| 3 | 403.2  |       |        | 385.2  | T   | 759.4  | 380.2 | 742.4  | 741.4  | 7 |
| 4 | 474.2  |       |        | 456.2  | A   | 658.4  | 329.7 | 641.4  | 640.4  | 6 |
| 5 | 603.2  |       |        | 585.2  | E   | 587.4  |       | 570.3  | 569.3  | 5 |
| 6 | 716.3  | 358.7 |        | 698.3  | L   | 458.3  |       | 441.3  |        | 4 |
| 7 | 773.4  | 387.2 |        | 755.3  | G   | 345.2  |       | 328.2  |        | 3 |
| 8 | 886.4  | 443.7 |        | 868.4  | I   | 288.2  |       | 271.2  |        | 2 |
| 9 | 1060.5 | 530.8 | 1043.5 | 1042.5 | R   | 175.1  |       | 158.1  |        | 1 |

Gene symbol: Ubxd2

Protein name: UBX domain-containing protein 2

Protein accession numbers: IPI00165799,IPI00719854

Peptide sequence: (R)LLDLELAPSASVLLPAGR(P)

Exclusive (unique to this protein): TRUE

SEQUEST XCorr score: 2.05 SEQUEST DCn score: 0.672

Fix modifications: None

Variable modifications: None

charge: 2

Observed m/z: 967.5669

Actual minus calculated peptide mass (AMU): -0.006958

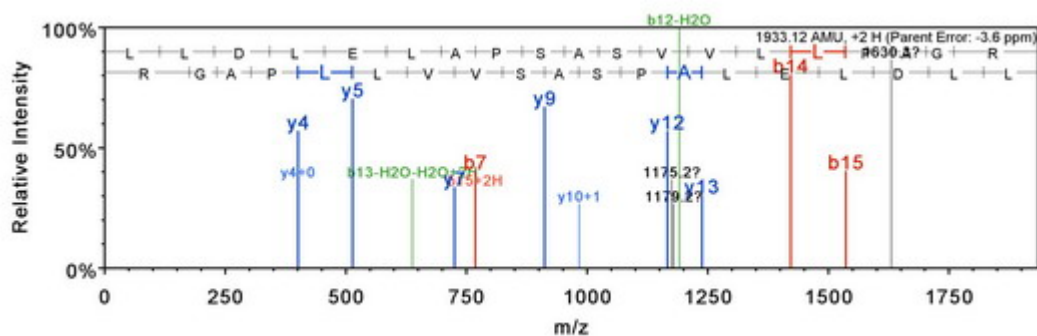

| B  | B ions | B+2H  | B-NH3  | B-H2O  | AA | Y ions | Y+2H  | Y-NH3  | Y-H2O  | Y  |
|----|--------|-------|--------|--------|----|--------|-------|--------|--------|----|
| 1  | 114.1  |       |        |        | L  | 1934.1 | 967.6 | 1917.1 | 1916.1 | 19 |
| 2  | 227.2  |       |        |        | L  | 1821.1 | 911.0 | 1804.0 | 1803.0 | 18 |
| 3  | 342.2  |       |        | 324.2  | D  | 1708.0 | 854.5 | 1690.9 | 1690.0 | 17 |
| 4  | 455.3  |       |        | 437.3  | L  | 1592.9 | 797.0 | 1575.9 | 1574.9 | 16 |
| 5  | 584.3  |       |        | 566.3  | E  | 1479.9 | 740.4 | 1462.8 | 1461.8 | 15 |
| 6  | 697.4  | 349.2 |        | 679.4  | L  | 1350.8 | 675.9 | 1333.8 | 1332.8 | 14 |
| 7  | 768.5  | 384.7 |        | 750.4  | A  | 1237.7 | 619.4 | 1220.7 | 1219.7 | 13 |
| 8  | 865.5  | 433.3 |        | 847.5  | P  | 1166.7 | 583.9 | 1149.7 | 1148.7 | 12 |
| 9  | 952.5  | 476.8 |        | 934.5  | S  | 1069.6 | 535.3 | 1052.6 | 1051.6 | 11 |
| 10 | 1023.6 | 512.3 |        | 1005.6 | A  | 982.6  | 491.8 | 965.6  | 964.6  | 10 |
| 11 | 1110.6 | 555.8 |        | 1092.6 | S  | 911.6  | 456.3 | 894.5  | 893.6  | 9  |
| 12 | 1209.7 | 605.3 |        | 1191.7 | V  | 824.5  | 412.8 | 807.5  |        | 8  |
| 13 | 1308.7 | 654.9 |        | 1290.7 | V  | 725.5  | 363.2 | 708.4  |        | 7  |
| 14 | 1421.8 | 711.4 |        | 1403.8 | L  | 626.4  | 313.7 | 609.4  |        | 6  |
| 15 | 1534.9 | 768.0 |        | 1516.9 | L  | 513.3  |       | 496.3  |        | 5  |
| 16 | 1632.0 | 816.5 |        | 1614.0 | P  | 400.2  |       | 383.2  |        | 4  |
| 17 | 1703.0 | 852.0 |        | 1685.0 | A  | 303.2  |       | 286.2  |        | 3  |
| 18 | 1760.0 | 880.5 |        | 1742.0 | G  | 232.1  |       | 215.1  |        | 2  |
| 19 | 1934.1 | 967.6 | 1917.1 | 1916.1 | R  | 175.1  |       | 158.1  |        | 1  |

Gene symbol: Upp1

Protein name: Uridine phosphorylase 1

Protein accession numbers: IPI00323353

Peptide sequence: (K)AAVVCVTLDDR(L)

Exclusive (unique to this protein): TRUE

SEQUEST XCorr score: 2.42 SEQUEST DCn score: 0.584

Fix modifications: C5: Carbamidomethyl (+57.02) Variable modifications: None

charge: 2

Observed m/z: 608.8397

Actual minus calculated peptide mass (AMU): -0.0009766

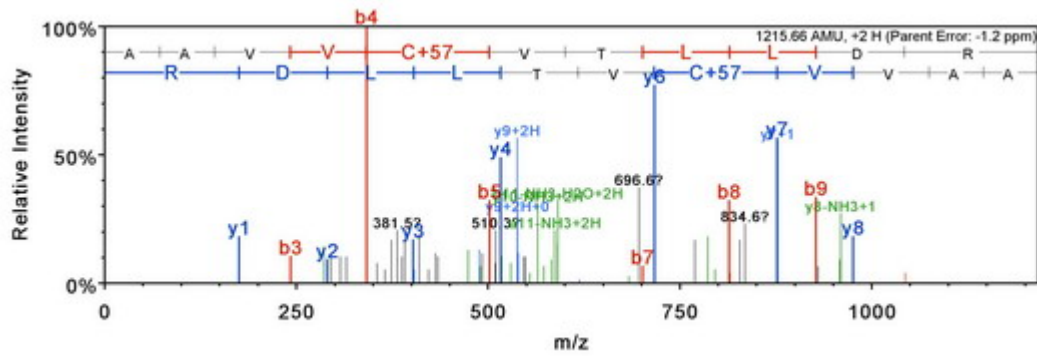

| B  | B Ions | B+2H  | B-NH3  | B-H2O  | AA   | Y Ions | Y+2H  | Y-NH3  | Y-H2O  | Y  |
|----|--------|-------|--------|--------|------|--------|-------|--------|--------|----|
| 1  | 72.0   |       |        |        | A    | 1216.7 | 608.8 | 1199.7 | 1198.7 | 11 |
| 2  | 143.1  |       |        |        | A    | 1145.6 | 573.3 | 1128.6 | 1127.6 | 10 |
| 3  | 242.2  |       |        |        | V    | 1074.6 | 537.8 | 1057.6 | 1056.6 | 9  |
| 4  | 341.2  |       |        |        | V    | 975.5  | 488.3 | 958.5  | 957.5  | 8  |
| 5  | 501.3  |       |        |        | C+57 | 876.5  | 438.7 | 859.4  | 858.5  | 7  |
| 6  | 600.3  | 300.7 |        |        | V    | 716.4  | 358.7 | 699.4  | 698.4  | 6  |
| 7  | 701.4  | 351.2 |        | 683.4  | T    | 617.4  |       | 600.3  | 599.4  | 5  |
| 8  | 814.5  | 407.7 |        | 796.4  | L    | 516.3  |       | 499.3  | 498.3  | 4  |
| 9  | 927.5  | 464.3 |        | 909.5  | L    | 403.2  |       | 386.2  | 385.2  | 3  |
| 10 | 1042.6 | 521.8 |        | 1024.5 | D    | 290.2  |       | 273.1  | 272.1  | 2  |
| 11 | 1216.7 | 608.8 | 1199.7 | 1198.7 | R    | 175.1  |       | 158.1  |        | 1  |

Gene symbol: Uqcrc1

Protein name: Ubiquinol-cytochrome-c reductase complex core protein 1, mitochondrial precursor

Protein accession numbers: IPI00111885,IPI00653598

Peptide sequence: (R)NALVSHLDGTTTPVCEDIGR(S)

Exclusive (unique to this protein): TRUE

SEQUEST XCorr score: 2.56 SEQUEST DCn score: 0.509

Fix modifications: C14: Carbamidomethyl (+57.02)Variable modifications: None

charge: 3

Observed m/z: 685.3353

Actual minus calculated peptide mass (AMU): -0.007568

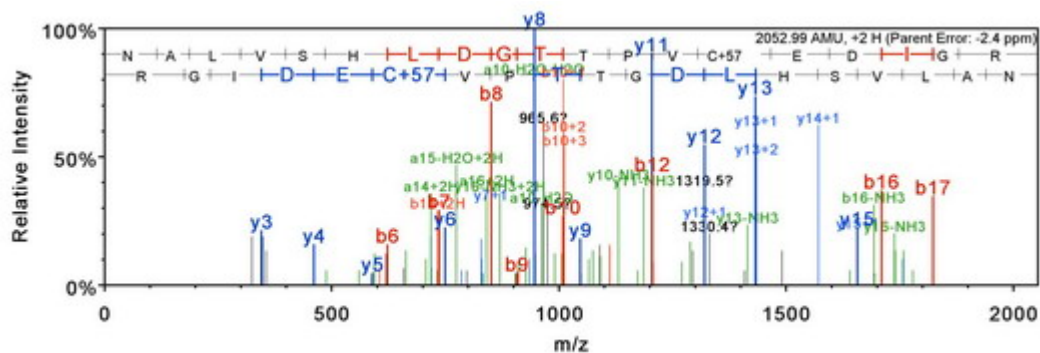

| B  | B Ions | B+2H   | B-NH3  | B-H2O  | AA   | Y Ions | Y+2H   | Y-NH3  | Y-H2O  | Y  |
|----|--------|--------|--------|--------|------|--------|--------|--------|--------|----|
| 1  | 115.1  |        | 98.0   |        | N    | 2054.0 | 1027.5 | 2037.0 | 2036.0 | 19 |
| 2  | 186.1  |        | 169.1  |        | A    | 1940.0 | 970.5  | 1922.9 | 1921.9 | 18 |
| 3  | 299.2  |        | 282.2  |        | L    | 1868.9 | 935.0  | 1851.9 | 1850.9 | 17 |
| 4  | 398.2  |        | 381.2  |        | V    | 1755.8 | 878.4  | 1738.8 | 1737.8 | 16 |
| 5  | 485.3  |        | 468.3  | 467.3  | S    | 1656.8 | 828.9  | 1639.7 | 1638.8 | 15 |
| 6  | 622.3  | 311.7  | 605.3  | 604.3  | H    | 1569.7 | 785.4  | 1552.7 | 1551.7 | 14 |
| 7  | 735.4  | 368.2  | 718.4  | 717.4  | L    | 1432.7 | 716.8  | 1415.7 | 1414.7 | 13 |
| 8  | 850.4  | 425.7  | 833.4  | 832.4  | D    | 1319.6 | 660.3  | 1302.6 | 1301.6 | 12 |
| 9  | 907.5  | 454.2  | 890.4  | 889.5  | G    | 1204.6 | 602.8  | 1187.5 | 1186.5 | 11 |
| 10 | 1008.5 | 504.8  | 991.5  | 990.5  | T    | 1147.5 | 574.3  | 1130.5 | 1129.5 | 10 |
| 11 | 1109.6 | 555.3  | 1092.5 | 1091.5 | T    | 1046.5 | 523.8  | 1029.5 | 1028.5 | 9  |
| 12 | 1206.6 | 603.8  | 1189.6 | 1188.6 | P    | 945.5  | 473.2  | 928.4  | 927.4  | 8  |
| 13 | 1305.7 | 653.3  | 1288.7 | 1287.7 | V    | 848.4  | 424.7  | 831.4  | 830.4  | 7  |
| 14 | 1465.7 | 733.4  | 1448.7 | 1447.7 | C+57 | 749.3  | 375.2  | 732.3  | 731.3  | 6  |
| 15 | 1594.8 | 797.9  | 1577.7 | 1576.7 | E    | 589.3  |        | 572.3  | 571.3  | 5  |
| 16 | 1709.8 | 855.4  | 1692.8 | 1691.8 | D    | 460.3  |        | 443.2  | 442.2  | 4  |
| 17 | 1822.9 | 911.9  | 1805.8 | 1804.9 | I    | 345.2  |        | 328.2  |        | 3  |
| 18 | 1879.9 | 940.5  | 1862.9 | 1861.9 | G    | 232.1  |        | 215.1  |        | 2  |
| 19 | 2054.0 | 1027.5 | 2037.0 | 2036.0 | R    | 175.1  |        | 158.1  |        | 1  |

Gene symbol: Uqcrcq

Protein name: Ubiquinol-cytochrome c reductase complex ubiquinone-binding protein QP-C

Protein accession numbers: IPI00224210

Peptide sequence: (R)HVISYSLSPFEQR(A)

Exclusive (unique to this protein): TRUE

SEQUEST XCorr score: 2.66 SEQUEST DCn score: 0.553

Fix modifications: None

Variable modifications: None

charge: 2

Observed m/z: 781.8987

Actual minus calculated peptide mass (AMU): -0.0070758

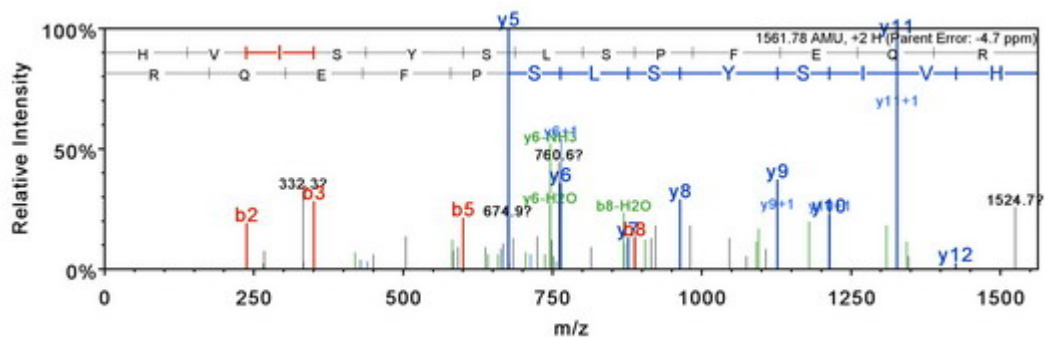

| B  | B Ions | B+2H  | B-NH3  | B-H2O  | AA | Y Ions | Y+2H  | Y-NH3  | Y-H2O  | Y  |
|----|--------|-------|--------|--------|----|--------|-------|--------|--------|----|
| 1  | 138.1  | 69.5  |        |        | H  | 1562.8 | 781.9 | 1545.8 | 1544.8 | 13 |
| 2  | 237.1  | 119.1 |        |        | V  | 1425.7 | 713.4 | 1408.7 | 1407.7 | 12 |
| 3  | 350.2  | 175.6 |        |        | I  | 1326.7 | 663.8 | 1309.6 | 1308.7 | 11 |
| 4  | 437.3  | 219.1 |        | 419.2  | S  | 1213.6 | 607.3 | 1196.6 | 1195.6 | 10 |
| 5  | 600.3  | 300.7 |        | 582.3  | Y  | 1126.5 | 563.8 | 1109.5 | 1108.5 | 9  |
| 6  | 687.4  | 344.2 |        | 669.3  | S  | 963.5  | 482.3 | 946.5  | 945.5  | 8  |
| 7  | 800.4  | 400.7 |        | 782.4  | L  | 876.5  | 438.7 | 859.4  | 858.5  | 7  |
| 8  | 887.5  | 444.2 |        | 869.5  | S  | 763.4  | 382.2 | 746.4  | 745.4  | 6  |
| 9  | 984.5  | 492.8 |        | 966.5  | P  | 676.3  |       | 659.3  | 658.3  | 5  |
| 10 | 1131.6 | 566.3 |        | 1113.6 | F  | 579.3  |       | 562.3  | 561.3  | 4  |
| 11 | 1260.6 | 630.8 |        | 1242.6 | E  | 432.2  |       | 415.2  | 414.2  | 3  |
| 12 | 1388.7 | 694.9 | 1371.7 | 1370.7 | Q  | 303.2  |       | 286.2  |        | 2  |
| 13 | 1562.8 | 781.9 | 1545.8 | 1544.8 | R  | 175.1  |       | 158.1  |        | 1  |

Gene symbol: Usp15

Protein name: Isoform 1 of Ubiquitin carboxyl-terminal hydrolase 15

Protein accession numbers: IPI00154012,IPI00403342

Peptide sequence: (R)QDTFSGTGFFPLDR(E)

Exclusive (unique to this protein): TRUE

SEQUEST XCorr score: 2.19 SEQUEST DCn score: 0.609

Fix modifications: None

Variable modifications: None

charge: 2 Observed m/z: 794.3739

Actual minus calculated peptide mass (AMU): -0.004639

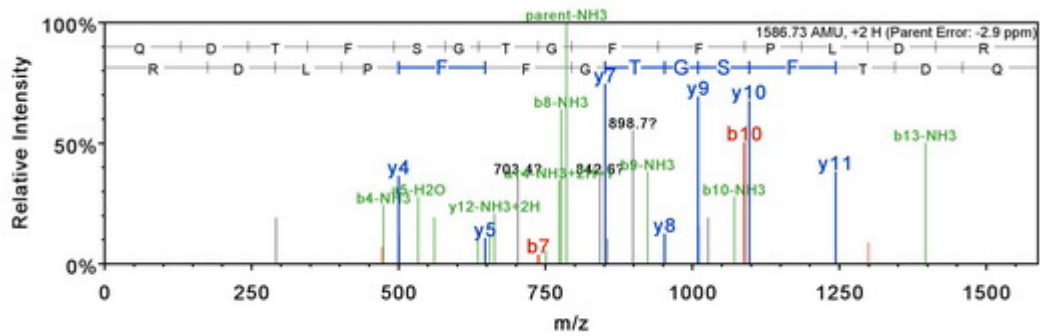



| B  | B Ions | B+2H  | B-NH3  | B-H2O  | AA | Y Ions | Y+2H  | Y-NH3  | Y-H2O  | Y  |
|----|--------|-------|--------|--------|----|--------|-------|--------|--------|----|
| 1  | 129.1  |       | 112.0  |        | Q  | 1587.7 | 794.4 | 1570.7 | 1569.7 | 14 |
| 2  | 244.1  |       | 227.1  | 226.1  | D  | 1459.7 | 730.4 | 1442.7 | 1441.7 | 13 |
| 3  | 345.1  |       | 328.1  | 327.1  | T  | 1344.7 | 672.8 | 1327.6 | 1326.7 | 12 |
| 4  | 492.2  |       | 475.2  | 474.2  | F  | 1243.6 | 622.3 | 1226.6 | 1225.6 | 11 |
| 5  | 579.2  |       | 562.2  | 561.2  | S  | 1096.5 | 548.8 | 1079.5 | 1078.5 | 10 |
| 6  | 636.3  | 318.6 | 619.2  | 618.3  | G  | 1009.5 | 505.3 | 992.5  | 991.5  | 9  |
| 7  | 737.3  | 369.2 | 720.3  | 719.3  | T  | 952.5  | 476.8 | 935.5  | 934.5  | 8  |
| 8  | 794.3  | 397.7 | 777.3  | 776.3  | G  | 851.4  | 426.2 | 834.4  | 833.4  | 7  |
| 9  | 941.4  | 471.2 | 924.4  | 923.4  | F  | 794.4  | 397.7 | 777.4  | 776.4  | 6  |
| 10 | 1088.5 | 544.7 | 1071.4 | 1070.5 | F  | 647.4  |       | 630.3  | 629.3  | 5  |
| 11 | 1185.5 | 593.3 | 1168.5 | 1167.5 | P  | 500.3  |       | 483.3  | 482.3  | 4  |
| 12 | 1298.6 | 649.8 | 1281.6 | 1280.6 | L  | 403.2  |       | 386.2  | 385.2  | 3  |
| 13 | 1413.6 | 707.3 | 1396.6 | 1395.6 | D  | 290.2  |       | 273.1  | 272.1  | 2  |
| 14 | 1587.7 | 794.4 | 1570.7 | 1569.7 | R  | 175.1  |       | 158.1  |        | 1  |

Gene symbol: Usp19

Protein name: 16 days embryo kidney cDNA, RIKEN full-length enriched library, clone:I920015N15 product:ubiquitin specific protease 19, full insert sequence

Protein accession numbers: IPI00420483,IPI00457619,IPI00762408

Peptide sequence: (R)LEDVDAAFTDTDCVVR(L)

Exclusive (unique to this protein): TRUE

SEQUEST XCorr score: 2.03 SEQUEST DCn score: 0.709

Fix modifications: C13: Carbamidomethyl (+57.02)Variable modifications: None

charge: 2

Observed m/z: 913.4135

Actual minus calculated peptide mass (AMU): -0.008789

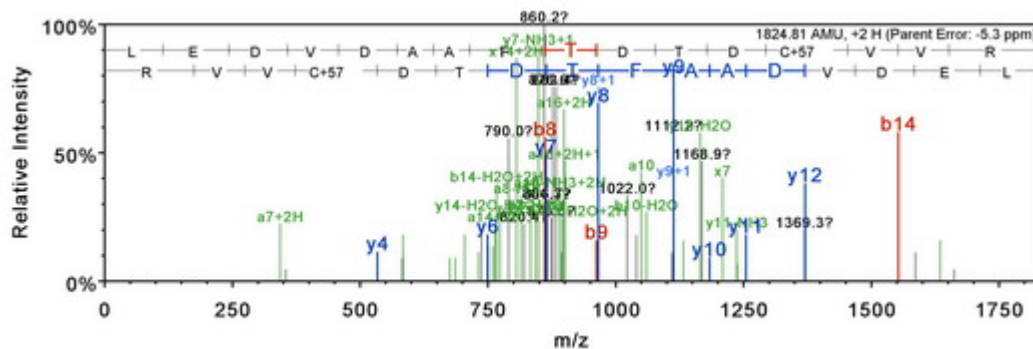

| B  | B Ions | B+2H  | B-NH3  | B-H2O  | AA   | Y Ions | Y+2H  | Y-NH3  | Y-H2O  | Y  |
|----|--------|-------|--------|--------|------|--------|-------|--------|--------|----|
| 1  | 114.1  |       |        |        | L    | 1825.8 | 913.4 | 1808.8 | 1807.8 | 16 |
| 2  | 243.1  |       |        | 225.1  | E    | 1712.7 | 856.9 | 1695.7 | 1694.7 | 15 |
| 3  | 358.2  |       |        | 340.2  | D    | 1583.7 | 792.4 | 1566.7 | 1565.7 | 14 |
| 4  | 457.2  |       |        | 439.2  | V    | 1468.7 | 734.8 | 1451.7 | 1450.7 | 13 |
| 5  | 572.3  |       |        | 554.3  | D    | 1369.6 | 685.3 | 1352.6 | 1351.6 | 12 |
| 6  | 643.3  | 322.2 |        | 625.3  | A    | 1254.6 | 627.8 | 1237.5 | 1236.6 | 11 |
| 7  | 714.3  | 357.7 |        | 696.3  | A    | 1183.5 | 592.3 | 1166.5 | 1165.5 | 10 |
| 8  | 861.4  | 431.2 |        | 843.4  | F    | 1112.5 | 556.8 | 1095.5 | 1094.5 | 9  |
| 9  | 962.5  | 481.7 |        | 944.4  | T    | 965.4  | 483.2 | 948.4  | 947.4  | 8  |
| 10 | 1077.5 | 539.2 |        | 1059.5 | D    | 864.4  | 432.7 | 847.4  | 846.4  | 7  |
| 11 | 1178.5 | 589.8 |        | 1160.5 | T    | 749.4  | 375.2 | 732.3  | 731.4  | 6  |
| 12 | 1293.5 | 647.3 |        | 1275.5 | D    | 648.3  |       | 631.3  | 630.3  | 5  |
| 13 | 1453.6 | 727.3 |        | 1435.6 | C+57 | 533.3  |       | 516.3  |        | 4  |
| 14 | 1552.7 | 776.8 |        | 1534.6 | V    | 373.3  |       | 356.2  |        | 3  |
| 15 | 1651.7 | 826.4 |        | 1633.7 | V    | 274.2  |       | 257.2  |        | 2  |
| 16 | 1825.8 | 913.4 | 1808.8 | 1807.8 | R    | 175.1  |       | 158.1  |        | 1  |

Gene symbol: Usp9x

Protein name: Ubiquitin specific peptidase 9, X chromosome

Protein accession numbers: IPI00798468

Peptide sequence: (R)FSEYLLLECP(A)SAEVR(G)

Exclusive (unique to this protein): TRUE

SEQUEST XCorr score: 2.12 SEQUEST DCn score: 0.548

Fix modifications: C8: Carbamidomethyl (+57.02) Variable modifications: None

charge: 2

Observed m/z: 850.4008

Actual minus calculated peptide mass (AMU): -0.0063456

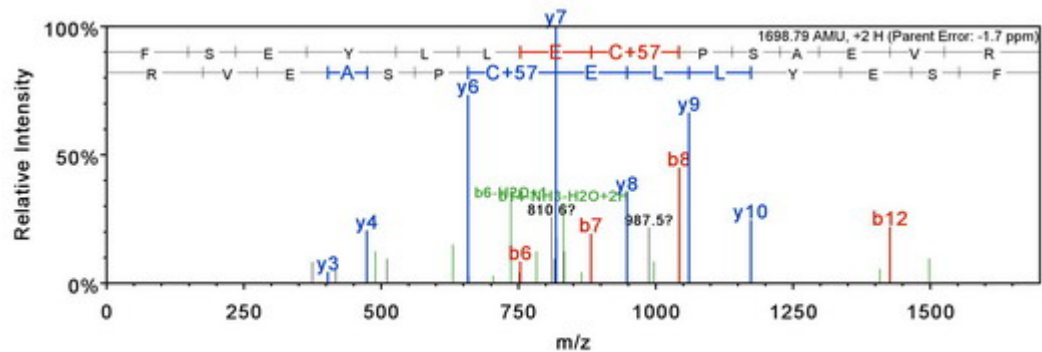

| B  | B Ions | B+2H  | B-NH3  | B-H2O  | AA   | Y Ions | Y+2H  | Y-NH3  | Y-H2O  | Y  |
|----|--------|-------|--------|--------|------|--------|-------|--------|--------|----|
| 1  | 148.1  |       |        |        | F    | 1699.8 | 850.4 | 1682.8 | 1681.8 | 14 |
| 2  | 235.1  |       |        | 217.1  | S    | 1552.7 | 776.9 | 1535.7 | 1534.7 | 13 |
| 3  | 364.2  |       |        | 346.1  | E    | 1465.7 | 733.4 | 1448.7 | 1447.7 | 12 |
| 4  | 527.2  |       |        | 509.2  | Y    | 1336.7 | 668.8 | 1319.6 | 1318.7 | 11 |
| 5  | 640.3  |       |        | 622.3  | L    | 1173.6 | 587.3 | 1156.6 | 1155.6 | 10 |
| 6  | 753.4  | 377.2 |        | 735.4  | L    | 1060.5 | 530.8 | 1043.5 | 1042.5 | 9  |
| 7  | 882.4  | 441.7 |        | 864.4  | E    | 947.4  | 474.2 | 930.4  | 929.4  | 8  |
| 8  | 1042.5 | 521.7 |        | 1024.4 | C+57 | 818.4  | 409.7 | 801.4  | 800.4  | 7  |
| 9  | 1139.5 | 570.3 |        | 1121.5 | P    | 658.4  | 329.7 | 641.3  | 640.3  | 6  |
| 10 | 1226.5 | 613.8 |        | 1208.5 | S    | 561.3  |       | 544.3  | 543.3  | 5  |
| 11 | 1297.6 | 649.3 |        | 1279.6 | A    | 474.3  |       | 457.2  | 456.3  | 4  |
| 12 | 1426.6 | 713.8 |        | 1408.6 | E    | 403.2  |       | 386.2  | 385.2  | 3  |
| 13 | 1525.7 | 763.4 |        | 1507.7 | V    | 274.2  |       | 257.2  |        | 2  |
| 14 | 1699.8 | 850.4 | 1682.8 | 1681.8 | R    | 175.1  |       | 158.1  |        | 1  |

Gene symbol: Utp14b;Acsl3

Protein name: UTP14, U3 small nucleolar ribonucleoprotein, homolog B

Protein accession numbers: IPI00345617

Peptide sequence: (K)LLEAVSSLGR(K)

Exclusive (unique to this protein): TRUE

SEQUEST XCorr score: 2.04 SEQUEST DCn score: 0.37

Fix modifications: None

Variable modifications: None

charge: 2

Observed m/z: 522.8011

Actual minus calculated peptide mass (AMU): -0.011149

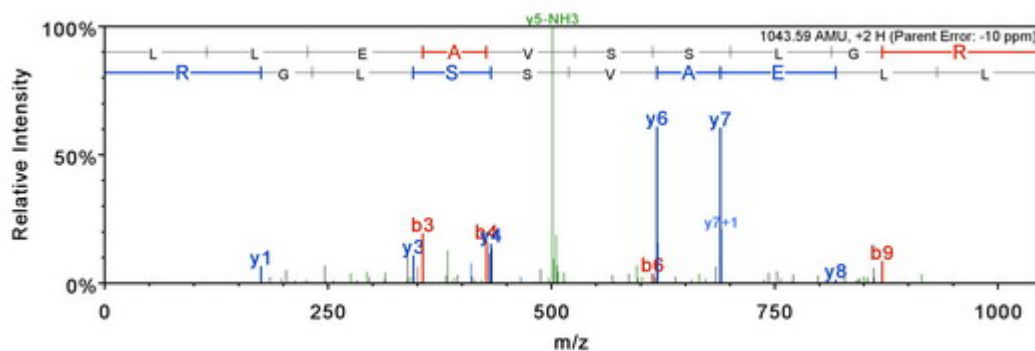

| B  | B Ions | B+2H  | B-NH3  | B-H2O  | AA | Y Ions | Y+2H  | Y-NH3  | Y-H2O  | Y  |
|----|--------|-------|--------|--------|----|--------|-------|--------|--------|----|
| 1  | 114.1  |       |        |        | L  | 1044.6 | 522.8 | 1027.6 | 1026.6 | 10 |
| 2  | 227.2  |       |        |        | L  | 931.5  | 466.3 | 914.5  | 913.5  | 9  |
| 3  | 356.2  |       |        | 338.2  | E  | 818.4  | 409.7 | 801.4  | 800.4  | 8  |
| 4  | 427.3  |       |        | 409.3  | A  | 689.4  | 345.2 | 672.4  | 671.4  | 7  |
| 5  | 526.3  |       |        | 508.3  | V  | 618.4  | 309.7 | 601.3  | 600.4  | 6  |
| 6  | 613.4  | 307.2 |        | 595.4  | S  | 519.3  |       | 502.3  | 501.3  | 5  |
| 7  | 700.4  | 350.7 |        | 682.4  | S  | 432.3  |       | 415.2  | 414.3  | 4  |
| 8  | 813.5  | 407.2 |        | 795.5  | L  | 345.2  |       | 328.2  |        | 3  |
| 9  | 870.5  | 435.8 |        | 852.5  | G  | 232.1  |       | 215.1  |        | 2  |
| 10 | 1044.6 | 522.8 | 1027.6 | 1026.6 | R  | 175.1  |       | 158.1  |        | 1  |

Gene symbol: Vat1

Protein name: Synaptic vesicle membrane protein VAT-1 homolog

Protein accession numbers: IPI00126072

Peptide sequence: (R)PAVPPAPGPGQLTLR(V)

Exclusive (unique to this protein): TRUE

SEQUEST XCorr score: 2.05 SEQUEST DCn score: 0.688

Fix modifications: None

Variable modifications: None

charge: 2

Observed m/z: 735.9225

Actual minus calculated peptide mass (AMU): -0.006226

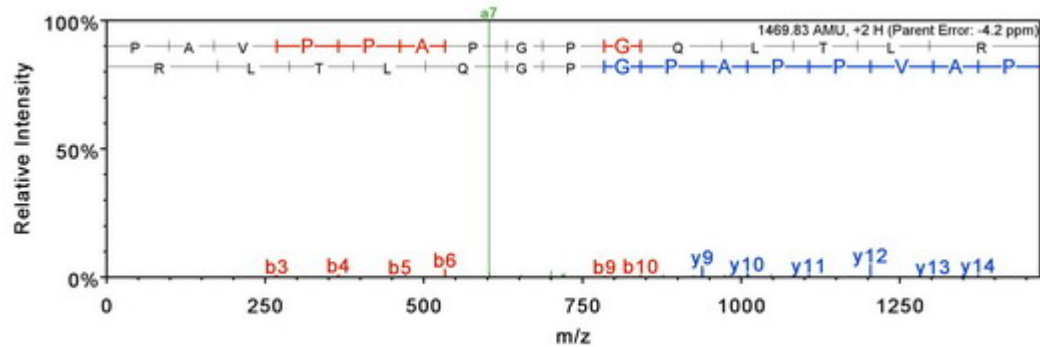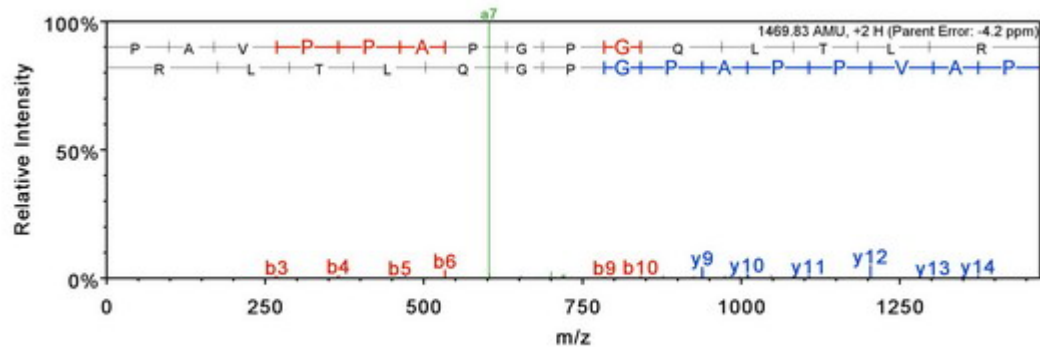

Gene symbol: Vdac1

Protein name: Isoform PI-VDAC1 of Voltage-dependent anion-selective channel protein 1

Protein accession numbers: IPI00122549,IPI00230540

Peptide sequence: (R)WTEYGLTFTEK(W)

Exclusive (unique to this protein): TRUE

SEQUEST XCorr score: 2.35 SEQUEST DCn score: 0.544

Fix modifications: None

Variable modifications: None

charge: 2

Observed m/z: 687.8332

Actual minus calculated peptide mass (AMU): 0.0003662

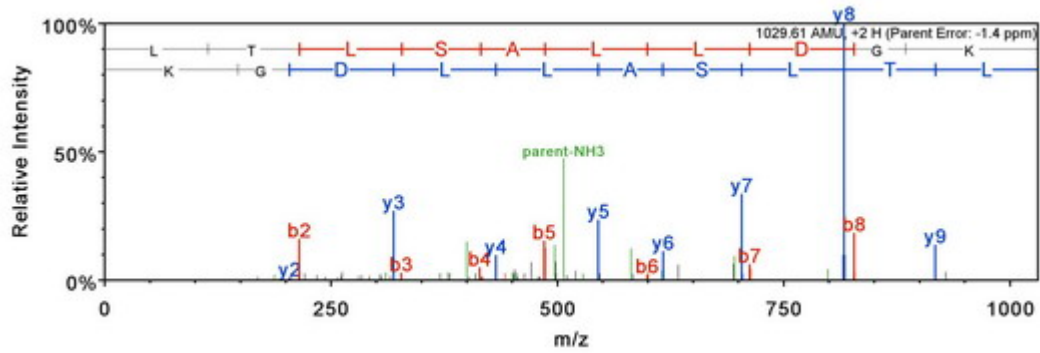

| B  | B Ions | B+2H  | B-NH3  | B-H2O  | A,A | Y Ions | Y+2H  | Y-NH3  | Y-H2O  | Y  |
|----|--------|-------|--------|--------|-----|--------|-------|--------|--------|----|
| 1  | 114.1  |       |        |        | L   | 1030.6 | 515.8 | 1013.6 | 1012.6 | 10 |
| 2  | 215.1  |       |        | 197.1  | T   | 917.5  | 459.3 | 900.5  | 899.5  | 9  |
| 3  | 328.2  |       |        | 310.2  | L   | 816.5  | 408.8 | 799.5  | 798.5  | 8  |
| 4  | 415.3  |       |        | 397.3  | S   | 703.4  | 352.2 | 686.4  | 685.4  | 7  |
| 5  | 486.3  |       |        | 468.3  | A   | 616.4  | 308.7 | 599.3  | 598.4  | 6  |
| 6  | 599.4  | 300.2 |        | 581.4  | L   | 545.3  |       | 528.3  | 527.3  | 5  |
| 7  | 712.5  | 356.7 |        | 694.5  | L   | 432.3  |       | 415.2  | 414.2  | 4  |
| 8  | 827.5  | 414.3 |        | 809.5  | D   | 319.2  |       | 302.1  | 301.2  | 3  |
| 9  | 884.5  | 442.8 |        | 866.5  | G   | 204.1  |       | 187.1  |        | 2  |
| 10 | 1030.6 | 515.8 | 1013.6 | 1012.6 | K   | 147.1  |       | 130.1  |        | 1  |

Gene symbol: Vkorc1

Protein name: Vitamin K epoxide reductase complex subunit 1

Protein accession numbers: IPI00133579

Peptide sequence: (R)ALCDVGTALSL(V)

Exclusive (unique to this protein): TRUE

SEQUEST XCorr score: 2.16 SEQUEST DCn score: 0.693

Fix modifications: C3: Carbamidomethyl (+57.02), C11: Carbamidomethyl (+57.02) Variable modifications: None

charge: 2

Observed m/z: 705.3284

Actual minus calculated peptide mass (AMU): -0.0028056

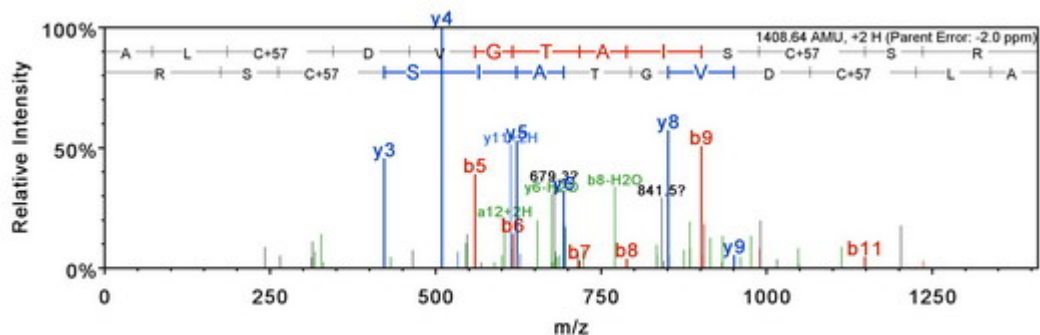

| B  | B Ions | B+2H  | B-NH3  | B-H2O  | A,A  | Y Ions | Y+2H  | Y-NH3  | Y-H2O  | Y  |
|----|--------|-------|--------|--------|------|--------|-------|--------|--------|----|
| 1  | 72.0   |       |        |        | A    | 1409.7 | 705.3 | 1392.6 | 1391.6 | 13 |
| 2  | 185.1  |       |        |        | L    | 1338.6 | 669.8 | 1321.6 | 1320.6 | 12 |
| 3  | 345.2  |       |        |        | C+57 | 1225.5 | 613.3 | 1208.5 | 1207.5 | 11 |
| 4  | 460.2  |       |        | 442.2  | D    | 1065.5 | 533.3 | 1048.5 | 1047.5 | 10 |
| 5  | 559.3  |       |        | 541.2  | V    | 950.5  | 475.7 | 933.5  | 932.5  | 9  |
| 6  | 616.3  | 308.6 |        | 598.3  | G    | 851.4  | 426.2 | 834.4  | 833.4  | 8  |
| 7  | 717.3  | 359.2 |        | 699.3  | T    | 794.4  | 397.7 | 777.4  | 776.4  | 7  |
| 8  | 788.4  | 394.7 |        | 770.4  | A    | 693.3  | 347.2 | 676.3  | 675.3  | 6  |
| 9  | 901.5  | 451.2 |        | 883.4  | I    | 622.3  |       | 605.3  | 604.3  | 5  |
| 10 | 988.5  | 494.7 |        | 970.5  | S    | 509.2  |       | 492.2  | 491.2  | 4  |
| 11 | 1148.5 | 574.8 |        | 1130.5 | C+57 | 422.2  |       | 405.2  | 404.2  | 3  |
| 12 | 1235.5 | 618.3 |        | 1217.5 | S    | 262.1  |       | 245.1  | 244.1  | 2  |
| 13 | 1409.7 | 705.3 | 1392.6 | 1391.6 | R    | 175.1  |       | 158.1  |        | 1  |

Gene symbol: Vps26a

Protein name: Isoform 2 of Vacuolar protein sorting-associated protein 26A

Protein accession numbers: IPI00329942

Peptide sequence: (K)EITGIGPSTTTTETETIAK(Y)

Exclusive (unique to this protein): TRUE

SEQUEST XCorr score: 2.55 SEQUEST DCn score: 0.736

Fix modifications: None

Variable modifications: None

charge: 2 Observed m/z: 924.9728

Actual minus calculated peptide mass (AMU): -0.006958

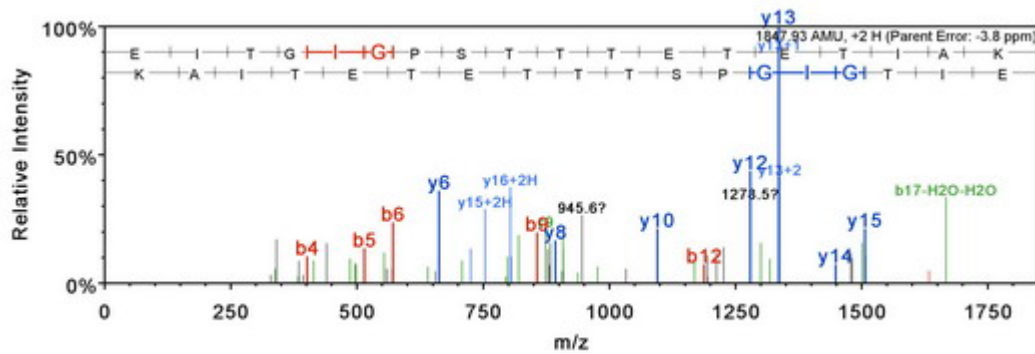

| B  | B Ions | B+2H  | B-NH3  | B-H2O  | AA | Y Ions | Y+2H  | Y-NH3  | Y-H2O  | Y  |
|----|--------|-------|--------|--------|----|--------|-------|--------|--------|----|
| 1  | 130.1  |       |        | 112.0  | E  | 1848.9 | 925.0 | 1831.9 | 1830.9 | 18 |
| 2  | 243.1  |       |        | 225.1  | I  | 1719.9 | 860.5 | 1702.9 | 1701.9 | 17 |
| 3  | 344.2  |       |        | 326.2  | T  | 1606.8 | 803.9 | 1589.8 | 1588.8 | 16 |
| 4  | 401.2  |       |        | 383.2  | G  | 1505.8 | 753.4 | 1488.7 | 1487.8 | 15 |
| 5  | 514.3  |       |        | 496.3  | I  | 1448.8 | 724.9 | 1431.7 | 1430.7 | 14 |
| 6  | 571.3  | 286.2 |        | 553.3  | G  | 1335.7 | 668.3 | 1318.6 | 1317.7 | 13 |
| 7  | 668.4  | 334.7 |        | 650.4  | P  | 1278.6 | 639.8 | 1261.6 | 1260.6 | 12 |
| 8  | 755.4  | 378.2 |        | 737.4  | S  | 1181.6 | 591.3 | 1164.6 | 1163.6 | 11 |
| 9  | 856.4  | 428.7 |        | 838.4  | T  | 1094.6 | 547.8 | 1077.5 | 1076.5 | 10 |
| 10 | 957.5  | 479.3 |        | 939.5  | T  | 993.5  | 497.3 | 976.5  | 975.5  | 9  |
| 11 | 1058.5 | 529.8 |        | 1040.5 | T  | 892.5  | 446.7 | 875.4  | 874.5  | 8  |
| 12 | 1187.6 | 594.3 |        | 1169.6 | E  | 791.4  | 396.2 | 774.4  | 773.4  | 7  |
| 13 | 1288.6 | 644.8 |        | 1270.6 | T  | 662.4  | 331.7 | 645.4  | 644.4  | 6  |
| 14 | 1417.7 | 709.3 |        | 1399.7 | E  | 561.3  |       | 544.3  | 543.3  | 5  |
| 15 | 1518.7 | 759.9 |        | 1500.7 | T  | 432.3  |       | 415.3  | 414.3  | 4  |
| 16 | 1631.8 | 816.4 |        | 1613.8 | I  | 331.2  |       | 314.2  |        | 3  |
| 17 | 1702.8 | 851.9 |        | 1684.8 | A  | 218.2  |       | 201.1  |        | 2  |
| 18 | 1848.9 | 925.0 | 1831.9 | 1830.9 | K  | 147.1  |       | 130.1  |        | 1  |

Gene symbol: Vps29

Protein name: Isoform 1 of Vacuolar protein sorting-associated protein 29

Protein accession numbers: IPI00136936,IPI00230513

Peptide sequence: (R)GDFDENLNYPEQK(V)

Exclusive (unique to this protein): TRUE

SEQUEST XCorr score: 2.07 SEQUEST DCn score: 0.473

Fix modifications: None

Variable modifications: None

charge: 2

Observed m/z: 784.8494

Actual minus calculated peptide mass (AMU): 0.003784

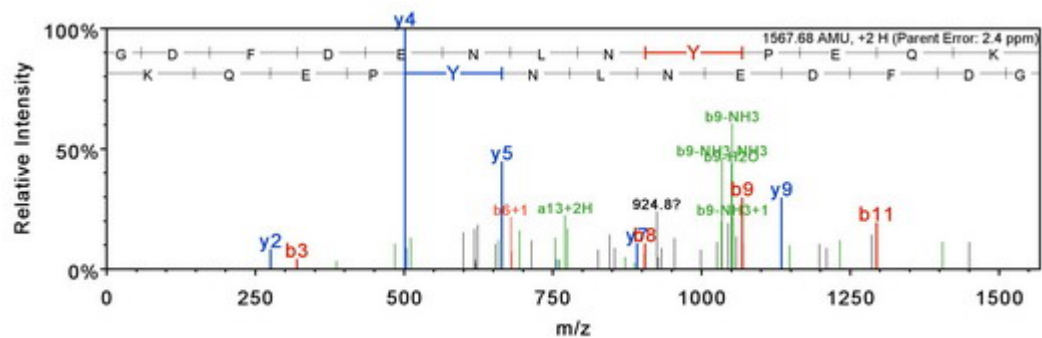

| B  | B Ions | B+2H  | B-NH3  | B-H2O  | A,A | Y Ions | Y+2H  | Y-NH3  | Y-H2O  | Y  |
|----|--------|-------|--------|--------|-----|--------|-------|--------|--------|----|
| 1  | 58.0   |       |        |        | G   | 1568.7 | 784.9 | 1551.7 | 1550.7 | 13 |
| 2  | 173.1  |       |        | 155.1  | D   | 1511.7 | 756.3 | 1494.6 | 1493.7 | 12 |
| 3  | 320.1  |       |        | 302.1  | F   | 1396.6 | 698.8 | 1379.6 | 1378.6 | 11 |
| 4  | 435.2  |       |        | 417.1  | D   | 1249.6 | 625.3 | 1232.5 | 1231.6 | 10 |
| 5  | 564.2  |       |        | 546.2  | E   | 1134.5 | 567.8 | 1117.5 | 1116.5 | 9  |
| 6  | 678.2  | 339.6 | 661.2  | 660.2  | N   | 1005.5 | 503.3 | 988.5  | 987.5  | 8  |
| 7  | 791.3  | 396.2 | 774.3  | 773.3  | L   | 891.5  | 446.2 | 874.4  | 873.5  | 7  |
| 8  | 905.4  | 453.2 | 888.3  | 887.4  | N   | 778.4  | 389.7 | 761.4  | 760.4  | 6  |
| 9  | 1068.4 | 534.7 | 1051.4 | 1050.4 | Y   | 664.3  |       | 647.3  | 646.3  | 5  |
| 10 | 1165.5 | 583.2 | 1148.5 | 1147.5 | P   | 501.3  |       | 484.2  | 483.3  | 4  |
| 11 | 1294.5 | 647.8 | 1277.5 | 1276.5 | E   | 404.2  |       | 387.2  | 386.2  | 3  |
| 12 | 1422.6 | 711.8 | 1405.5 | 1404.6 | Q   | 275.2  |       | 258.1  |        | 2  |
| 13 | 1568.7 | 784.9 | 1551.7 | 1550.7 | K   | 147.1  |       | 130.1  |        | 1  |

Gene symbol: Vps4a

Protein name: Vacuolar protein sorting-associated protein 4A

Protein accession numbers: IPI00312172

Peptide sequence: (K)TEGYSGADISIIVR(D)

Exclusive (unique to this protein): TRUE

SEQUEST XCorr score: 2.36 SEQUEST DCn score: 0.188

Fix modifications: None

Variable modifications: None

charge: 2 Observed m/z: 740.8904

Actual minus calculated peptide mass (AMU): 0.0081757

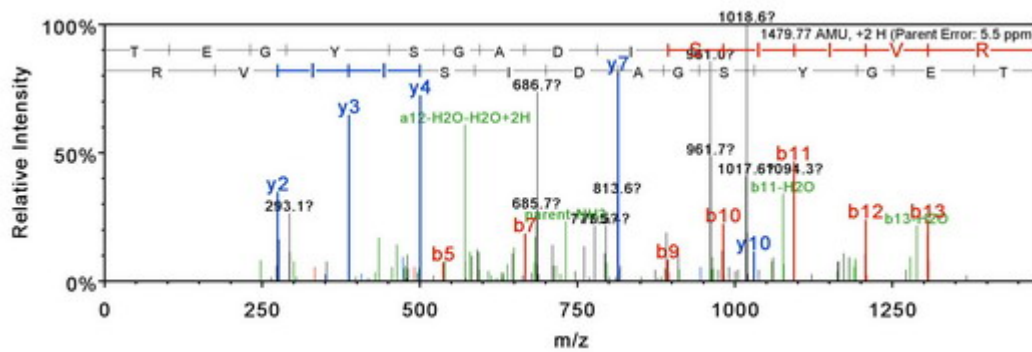



| B  | B Ions | B+2H  | B-NH3  | B-H2O  | AA | Y Ions | Y+2H  | Y-NH3  | Y-H2O  | Y  |
|----|--------|-------|--------|--------|----|--------|-------|--------|--------|----|
| 1  | 102.1  |       |        | 84.0   | T  | 1480.8 | 740.9 | 1463.7 | 1462.8 | 14 |
| 2  | 231.1  |       |        | 213.1  | E  | 1379.7 | 690.4 | 1362.7 | 1361.7 | 13 |
| 3  | 288.1  |       |        | 270.1  | G  | 1250.7 | 625.8 | 1233.7 | 1232.7 | 12 |
| 4  | 451.2  |       |        | 433.2  | Y  | 1193.7 | 597.3 | 1176.6 | 1175.6 | 11 |
| 5  | 538.2  |       |        | 520.2  | S  | 1030.6 | 515.8 | 1013.6 | 1012.6 | 10 |
| 6  | 595.2  | 298.1 |        | 577.2  | G  | 943.6  | 472.3 | 926.5  | 925.6  | 9  |
| 7  | 666.3  | 333.6 |        | 648.3  | A  | 886.5  | 443.8 | 869.5  | 868.5  | 8  |
| 8  | 781.3  | 391.2 |        | 763.3  | D  | 815.5  | 408.3 | 798.5  | 797.5  | 7  |
| 9  | 894.4  | 447.7 |        | 876.4  | I  | 700.5  | 350.7 | 683.5  | 682.5  | 6  |
| 10 | 981.4  | 491.2 |        | 963.4  | S  | 587.4  |       | 570.4  | 569.4  | 5  |
| 11 | 1094.5 | 547.8 |        | 1076.5 | I  | 500.4  |       | 483.3  |        | 4  |
| 12 | 1207.6 | 604.3 |        | 1189.6 | I  | 387.3  |       | 370.3  |        | 3  |
| 13 | 1306.7 | 653.8 |        | 1288.6 | V  | 274.2  |       | 257.2  |        | 2  |
| 14 | 1480.8 | 740.9 | 1463.7 | 1462.8 | R  | 175.1  |       | 158.1  |        | 1  |

Gene symbol: Ykt6

Protein name: Synaptobrevin homolog YKT6

Protein accession numbers: IPI00453771

Peptide sequence: (R)SDSLAGVVIADSEYPSR(V)

Exclusive (unique to this protein): TRUE

SEQUEST XCorr score: 2.96 SEQUEST DCn score: 0.538

Fix modifications: None

Variable modifications: None

charge: 2 Observed m/z: 883.4303

Actual minus calculated peptide mass (AMU): -0.008301

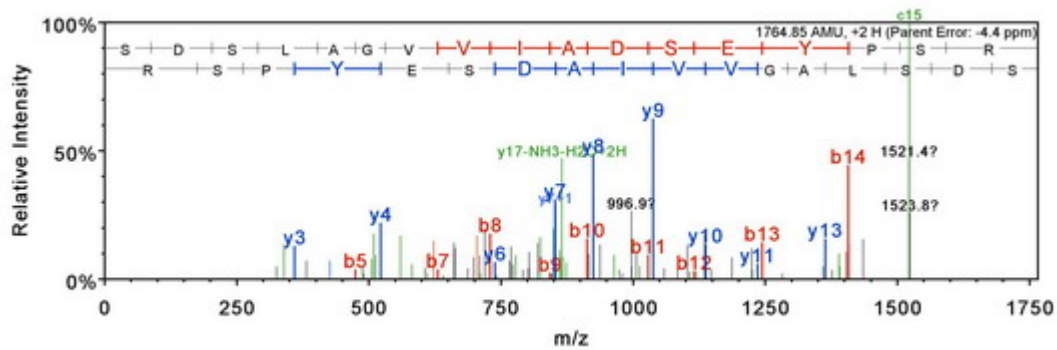

| B  | B Ions | B+2H  | B-NH3  | B-H2O  | AA | Y Ions | Y+2H  | Y-NH3  | Y-H2O  | Y  |
|----|--------|-------|--------|--------|----|--------|-------|--------|--------|----|
| 1  | 88.0   |       |        | 70.0   | S  | 1765.9 | 883.4 | 1748.8 | 1747.9 | 17 |
| 2  | 203.1  |       |        | 185.1  | D  | 1678.8 | 839.9 | 1661.8 | 1660.8 | 16 |
| 3  | 290.1  |       |        | 272.1  | S  | 1563.8 | 782.4 | 1546.8 | 1545.8 | 15 |
| 4  | 403.2  |       |        | 385.2  | L  | 1476.8 | 738.9 | 1459.7 | 1458.8 | 14 |
| 5  | 474.2  |       |        | 456.2  | A  | 1363.7 | 682.4 | 1346.7 | 1345.7 | 13 |
| 6  | 531.2  | 266.1 |        | 513.2  | G  | 1292.7 | 646.8 | 1275.6 | 1274.6 | 12 |
| 7  | 630.3  | 315.7 |        | 612.3  | V  | 1235.6 | 618.3 | 1218.6 | 1217.6 | 11 |
| 8  | 729.4  | 365.2 |        | 711.4  | V  | 1136.6 | 568.8 | 1119.5 | 1118.5 | 10 |
| 9  | 842.5  | 421.7 |        | 824.5  | I  | 1037.5 | 519.3 | 1020.5 | 1019.5 | 9  |
| 10 | 913.5  | 457.3 |        | 895.5  | A  | 924.4  | 462.7 | 907.4  | 906.4  | 8  |
| 11 | 1028.5 | 514.8 |        | 1010.5 | D  | 853.4  | 427.2 | 836.3  | 835.4  | 7  |
| 12 | 1115.6 | 558.3 |        | 1097.5 | S  | 738.3  | 369.7 | 721.3  | 720.3  | 6  |
| 13 | 1244.6 | 622.8 |        | 1226.6 | E  | 651.3  |       | 634.3  | 633.3  | 5  |
| 14 | 1407.7 | 704.3 |        | 1389.7 | Y  | 522.3  |       | 505.2  | 504.3  | 4  |
| 15 | 1504.7 | 752.9 |        | 1486.7 | P  | 359.2  |       | 342.2  | 341.2  | 3  |
| 16 | 1591.8 | 796.4 |        | 1573.7 | S  | 262.1  |       | 245.1  | 244.1  | 2  |
| 17 | 1765.9 | 883.4 | 1748.8 | 1747.9 | R  | 175.1  |       | 158.1  |        | 1  |

Gene symbol: Zar1

Protein name: Zygote arrest 1

Protein accession numbers: IPI00280501

Peptide sequence: (R)SEEGDVQAAGQAGWEQQPPPEDR(N)

Exclusive (unique to this protein): TRUE

SEQUEST XCorr score: 2.47 SEQUEST DCn score: 0.742

Fix modifications: None

Variable modifications: None

charge: 2

Observed m/z: 1241.0485

Actual minus calculated peptide mass (AMU): -0.0031752

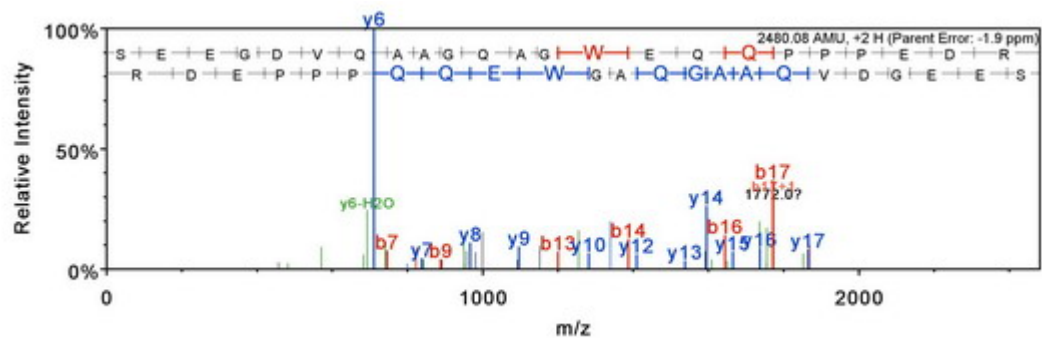

| B  | B Ions | B+2H   | B-NH3  | B-H2O  | A,A | Y Ions | Y+2H   | Y-NH3  | Y-H2O  | Y  |
|----|--------|--------|--------|--------|-----|--------|--------|--------|--------|----|
| 1  | 88.0   |        |        | 70.0   | S   | 2481.1 | 1241.0 | 2464.1 | 2463.1 | 23 |
| 2  | 217.1  |        |        | 199.1  | E   | 2394.1 | 1197.5 | 2377.0 | 2376.1 | 22 |
| 3  | 346.1  |        |        | 328.1  | E   | 2265.0 | 1133.0 | 2248.0 | 2247.0 | 21 |
| 4  | 403.2  |        |        | 385.1  | G   | 2136.0 | 1068.5 | 2118.9 | 2118.0 | 20 |
| 5  | 518.2  |        |        | 500.2  | D   | 2078.9 | 1040.0 | 2061.9 | 2060.9 | 19 |
| 6  | 617.2  | 309.1  |        | 599.2  | V   | 1963.9 | 982.5  | 1946.9 | 1945.9 | 18 |
| 7  | 745.3  | 373.2  | 728.3  | 727.3  | Q   | 1864.9 | 932.9  | 1847.8 | 1846.9 | 17 |
| 8  | 816.3  | 408.7  | 799.3  | 798.3  | A   | 1736.8 | 868.9  | 1719.8 | 1718.8 | 16 |
| 9  | 887.4  | 444.2  | 870.4  | 869.4  | A   | 1665.8 | 833.4  | 1648.7 | 1647.8 | 15 |
| 10 | 944.4  | 472.7  | 927.4  | 926.4  | G   | 1594.7 | 797.9  | 1577.7 | 1576.7 | 14 |
| 11 | 1072.5 | 536.7  | 1055.4 | 1054.4 | Q   | 1537.7 | 769.4  | 1520.7 | 1519.7 | 13 |
| 12 | 1143.5 | 572.3  | 1126.5 | 1125.5 | A   | 1409.7 | 705.3  | 1392.6 | 1391.6 | 12 |
| 13 | 1200.5 | 600.8  | 1183.5 | 1182.5 | G   | 1338.6 | 669.8  | 1321.6 | 1320.6 | 11 |
| 14 | 1386.6 | 693.8  | 1369.6 | 1368.6 | W   | 1281.6 | 641.3  | 1264.6 | 1263.6 | 10 |
| 15 | 1515.6 | 758.3  | 1498.6 | 1497.6 | E   | 1095.5 | 548.3  | 1078.5 | 1077.5 | 9  |
| 16 | 1643.7 | 822.4  | 1626.7 | 1625.7 | Q   | 966.5  | 483.7  | 949.4  | 948.5  | 8  |
| 17 | 1771.8 | 886.4  | 1754.7 | 1753.7 | Q   | 838.4  | 419.7  | 821.4  | 820.4  | 7  |
| 18 | 1868.8 | 934.9  | 1851.8 | 1850.8 | P   | 710.4  | 355.7  | 693.3  | 692.3  | 6  |
| 19 | 1965.9 | 983.4  | 1948.8 | 1947.9 | P   | 613.3  |        | 596.3  | 595.3  | 5  |
| 20 | 2062.9 | 1032.0 | 2045.9 | 2044.9 | P   | 516.2  |        | 499.2  | 498.2  | 4  |
| 21 | 2192.0 | 1096.5 | 2174.9 | 2173.9 | E   | 419.2  |        | 402.2  | 401.2  | 3  |
| 22 | 2307.0 | 1154.0 | 2290.0 | 2289.0 | D   | 290.2  |        | 273.1  | 272.1  | 2  |
| 23 | 2481.1 | 1241.0 | 2464.1 | 2463.1 | R   | 175.1  |        | 158.1  |        | 1  |

Gene symbol: Zp1

Protein name: Zona pellucida sperm-binding protein 1 precursor

Protein accession numbers: IPI00310464

Peptide sequence: (K)TFSSYYQGSDYPLVR(L)

Exclusive (unique to this protein): TRUE

SEQUEST XCorr score: 2.25 SEQUEST DCn score: 0.603

Fix modifications: None

Variable modifications: None

charge: 2

Observed m/z: 891.9179

Actual minus calculated peptide mass (AMU): -0.005859

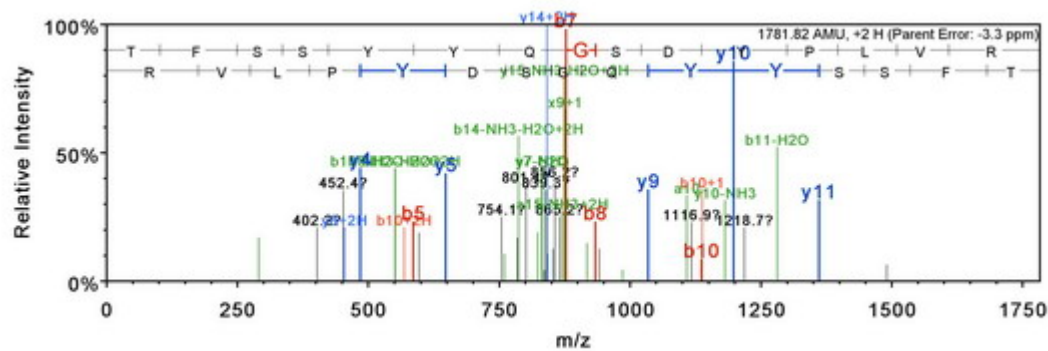

| B  | B Ions | B+2H  | B-NH3  | B-H2O  | AA | Y Ions | Y+2H  | Y-NH3  | Y-H2O  | Y  |
|----|--------|-------|--------|--------|----|--------|-------|--------|--------|----|
| 1  | 102.1  |       |        | 84.0   | T  | 1782.8 | 891.9 | 1765.8 | 1764.8 | 15 |
| 2  | 249.1  |       |        | 231.1  | F  | 1681.8 | 841.4 | 1664.8 | 1663.8 | 14 |
| 3  | 336.2  |       |        | 318.2  | S  | 1534.7 | 767.9 | 1517.7 | 1516.7 | 13 |
| 4  | 423.2  |       |        | 405.2  | S  | 1447.7 | 724.4 | 1430.7 | 1429.7 | 12 |
| 5  | 586.3  |       |        | 568.2  | Y  | 1360.7 | 680.8 | 1343.6 | 1342.6 | 11 |
| 6  | 749.3  | 375.2 |        | 731.3  | Y  | 1197.6 | 599.3 | 1180.6 | 1179.6 | 10 |
| 7  | 877.4  | 439.2 | 860.4  | 859.4  | Q  | 1034.5 | 517.8 | 1017.5 | 1016.5 | 9  |
| 8  | 934.4  | 467.7 | 917.4  | 916.4  | G  | 906.5  | 453.7 | 889.4  | 888.5  | 8  |
| 9  | 1021.4 | 511.2 | 1004.4 | 1003.4 | S  | 849.5  | 425.2 | 832.4  | 831.4  | 7  |
| 10 | 1136.5 | 568.7 | 1119.4 | 1118.4 | D  | 762.4  | 381.7 | 745.4  | 744.4  | 6  |
| 11 | 1299.5 | 650.3 | 1282.5 | 1281.5 | Y  | 647.4  |       | 630.4  |        | 5  |
| 12 | 1396.6 | 698.8 | 1379.5 | 1378.6 | P  | 484.3  |       | 467.3  |        | 4  |
| 13 | 1509.7 | 755.3 | 1492.6 | 1491.6 | L  | 387.3  |       | 370.3  |        | 3  |
| 14 | 1608.7 | 804.9 | 1591.7 | 1590.7 | V  | 274.2  |       | 257.2  |        | 2  |
| 15 | 1782.8 | 891.9 | 1765.8 | 1764.8 | R  | 175.1  |       | 158.1  |        | 1  |

Gene symbol: Zp3

Protein name: Zona pellucida sperm-binding protein 3 precursor

Protein accession numbers: IPI00114128

Peptide sequence: (K)LVQPGDLTLGSEGCQPR(V)

Exclusive (unique to this protein): TRUE

SEQUEST XCorr score: 2.48 SEQUEST DCn score: 0.672

Fix modifications: C14: Carbamidomethyl (+57.02) Variable modifications: None

charge: 2

Observed m/z: 913.9554

Actual minus calculated peptide mass (AMU): -0.004517

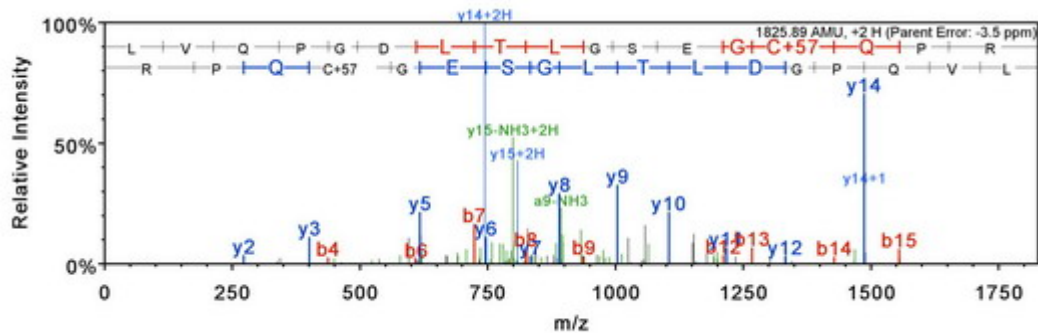

| B  | B ions | B+2H  | B-NH3  | B-H2O  | AA   | Y ions | Y+2H  | Y-NH3  | Y-H2O  | Y  |
|----|--------|-------|--------|--------|------|--------|-------|--------|--------|----|
| 1  | 114.1  |       |        |        | L    | 1826.9 | 914.0 | 1809.9 | 1808.9 | 17 |
| 2  | 213.2  |       |        |        | V    | 1713.8 | 857.4 | 1696.8 | 1695.8 | 16 |
| 3  | 341.2  |       | 324.2  |        | Q    | 1614.8 | 807.9 | 1597.7 | 1596.7 | 15 |
| 4  | 438.3  |       | 421.3  |        | P    | 1486.7 | 743.9 | 1469.7 | 1468.7 | 14 |
| 5  | 495.3  |       | 478.3  |        | G    | 1389.6 | 695.3 | 1372.6 | 1371.6 | 13 |
| 6  | 610.3  | 305.7 | 593.3  | 592.3  | D    | 1332.6 | 666.8 | 1315.6 | 1314.6 | 12 |
| 7  | 723.4  | 362.2 | 706.4  | 705.4  | L    | 1217.6 | 609.3 | 1200.6 | 1199.6 | 11 |
| 8  | 824.5  | 412.7 | 807.4  | 806.4  | T    | 1104.5 | 552.8 | 1087.5 | 1086.5 | 10 |
| 9  | 937.5  | 469.3 | 920.5  | 919.5  | L    | 1003.5 | 502.2 | 986.4  | 985.5  | 9  |
| 10 | 994.6  | 497.8 | 977.5  | 976.6  | G    | 890.4  | 445.7 | 873.4  | 872.4  | 8  |
| 11 | 1081.6 | 541.3 | 1064.6 | 1063.6 | S    | 833.4  | 417.2 | 816.3  | 815.4  | 7  |
| 12 | 1210.6 | 605.8 | 1193.6 | 1192.6 | E    | 746.3  | 373.7 | 729.3  | 728.3  | 6  |
| 13 | 1267.7 | 634.3 | 1250.6 | 1249.6 | G    | 617.3  |       | 600.3  |        | 5  |
| 14 | 1427.7 | 714.4 | 1410.7 | 1409.7 | C+57 | 560.3  |       | 543.2  |        | 4  |
| 15 | 1555.7 | 778.4 | 1538.7 | 1537.7 | Q    | 400.2  |       | 383.2  |        | 3  |
| 16 | 1652.8 | 826.9 | 1635.8 | 1634.8 | P    | 272.2  |       | 255.2  |        | 2  |
| 17 | 1826.9 | 914.0 | 1809.9 | 1808.9 | R    | 175.1  |       | 158.1  |        | 1  |
